# Supplementary material for: LncRNA Snhg3 aggravates hepatic steatosis via PPARγ signaling
Source: eLife journal article supplement (doi:10.7554/elife.96988), 2024-05-13

Figure 5E  
repeat 1.

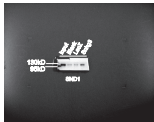

2.

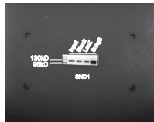

3.

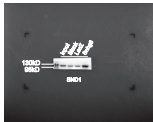

Supplement: fig5-data3 [file elife-96988-fig5-data3-v1.pdf]
