# Supplementary material for: LncRNA Snhg3 aggravates hepatic steatosis via PPARγ signaling
Source: eLife journal article supplement (doi:10.7554/elife.96988), 2024-05-13

# Figure 5M

1

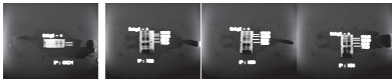

2

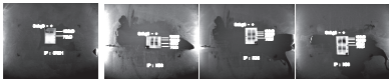

Supplement: fig5-data15 [file elife-96988-fig5-data15-v1.pdf]
