# Supplementary material for: LncRNA Snhg3 aggravates hepatic steatosis via PPARγ signaling
Source: eLife journal article supplement (doi:10.7554/elife.96988), 2024-05-13

Figure 6D

1 .

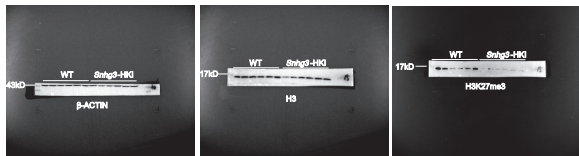

1 .

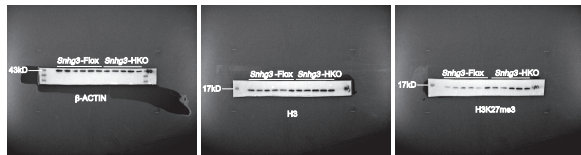

Supplement: fig6-data7 [file elife-96988-fig6-data7-v1.pdf]
