# Supplementary material for: LncRNA Snhg3 aggravates hepatic steatosis via PPARγ signaling
Source: eLife journal article supplement (doi:10.7554/elife.96988), 2024-05-13

Figure 7G

MPH

1.

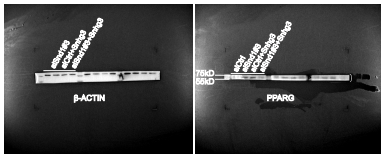

2.

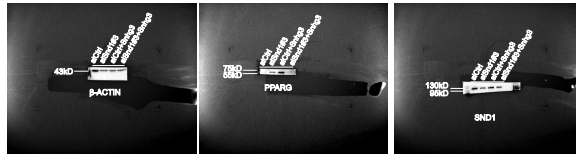

3.

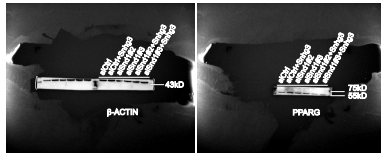

4.

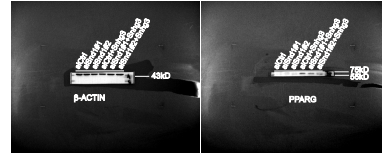

Hepa1-6 cells

1.

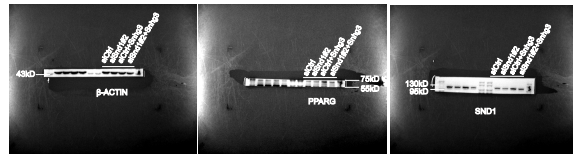

2.

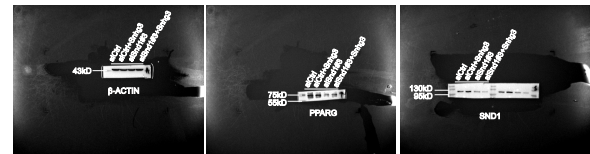

3.

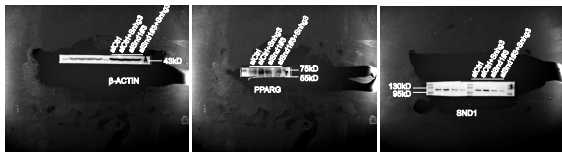

4.

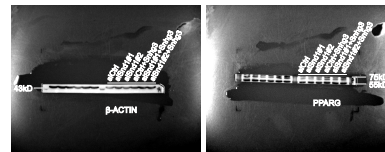

5.

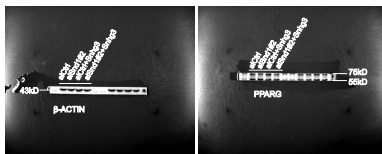

6.

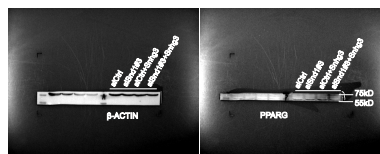

Supplement: fig7-data7 [file elife-96988-fig7-data7-v1.pdf]
