# Supplementary material for: LncRNA Snhg3 aggravates hepatic steatosis via PPARγ signaling
Source: eLife. 2024 Oct 22;13:RP96988. doi: 10.7554/eLife.96988 (PMC11495842; doi:10.7554/eLife.96988)
Supplement: Figure 4—source data 2. [file elife-96988-fig4-data2.xls]

## Sheet: log2FC>2
chr	start	end	length	signal value	fold change	p-value	Benjamini-Hochberg FDR	peak name
chr18	42290400	42290600	200	220.377	4.00015	0.000310441	0.540015	chip2_peak_5399
chr14	8078100	8078300	200	196.693	4.00024	0.000405446	1	chip1_peak_2570
chr12	110827100	110827400	300	196.694	4.00026	0.000586011	1	chip1_peak_3786
chr2	158007000	158007200	200	196.703	4.00044	0.000821119	1	chip1_peak_5469
chr12	46641400	46641600	200	220.406	4.00067	0.000705529	0.633391	chip2_peak_10840
chr15	59213200	59213400	200	196.717	4.00074	0.000719314	1	chip1_peak_4715
chr6	136553400	136553600	200	220.412	4.00079	0.000684677	0.631413	chip2_peak_10540
chr11	62313300	62313500	200	220.455	4.00157	0.000441636	0.586251	chip2_peak_7159
chr19	30874000	30874200	200	220.483	4.00208	0.000525682	0.60409	chip2_peak_8326
chr13	23889100	23889300	200	220.498	4.00235	0.000134924	0.420946	chip2_peak_2910
chr4	140436200	140436400	200	196.808	4.00258	7.17012e-05	1	chip1_peak_513
chr1	42705600	42705800	200	220.536	4.00305	0.000244854	0.505427	chip2_peak_4488
chr14	74929600	74929800	200	220.547	4.00325	0.000134574	0.420265	chip2_peak_2906
chr15	7165500	7165700	200	196.85	4.00345	0.000944041	1	chip1_peak_6411
chr7	126942800	126943000	200	220.562	4.00351	0.000959607	0.657711	chip2_peak_14340
chr7	98369800	98370000	200	196.892	4.0043	0.000613658	1	chip1_peak_3986
chr6	19296300	19296500	200	220.609	4.00436	0.000495798	0.598657	chip2_peak_7919
chr11	104521800	104522100	300	220.63	4.00475	0.000296907	0.533462	chip2_peak_5220
chr13	21937000	21937400	400	220.634	4.00482	4.41972e-08	0.00465176	chip2_peak_67
chr2	131217800	131218000	200	196.929	4.00505	2.40858e-05	0.935351	chip1_peak_225
chr5	43102000	43102400	400	220.649	4.00509	2.51627e-05	0.213367	chip2_peak_1007
chr15	25592000	25592200	200	196.941	4.00529	0.000929205	1	chip1_peak_6285
chr1	194991400	194991600	200	220.665	4.00537	0.000547992	0.608109	chip2_peak_8669
chr17	47651400	47651600	200	220.672	4.0055	0.000727365	0.63839	chip2_peak_11092
chr3	131257000	131257200	200	220.675	4.00556	0.000205948	0.483028	chip2_peak_3947
chr16	33187900	33188200	300	196.982	4.00612	0.000603244	1	chip1_peak_3922
chr8	92427800	92428000	200	220.712	4.00624	0.000742419	0.638827	chip2_peak_11335
chr8	69368800	69369000	200	220.762	4.00715	0.000623391	0.623754	chip2_peak_9681
chr6	102952600	102952800	200	220.767	4.00723	0.000946038	0.656668	chip2_peak_14146
chr2	39332600	39332800	200	220.767	4.00723	0.000955017	0.657417	chip2_peak_14278
chr6	25781000	25781200	200	220.791	4.00767	0.000168307	0.450142	chip2_peak_3427
chr11	45631900	45632100	200	197.091	4.00833	0.0007113	1	chip1_peak_4668
chr13	106916700	106916900	200	220.842	4.00859	0.000738508	0.638733	chip2_peak_11273
chr3	98244000	98244200	200	197.11	4.00872	0.000501248	1	chip1_peak_3194
chr5	114439900	114440100	200	197.11	4.00873	0.000934615	1	chip1_peak_6337
chr3	152723300	152723500	200	220.85	4.00873	0.000623503	0.623754	chip2_peak_9682
chr8	123240600	123240800	200	197.136	4.00926	0.000998827	1	chip1_peak_6816
chr2	60856800	60857100	300	197.147	4.00948	0.000218345	1	chip1_peak_1389
chr1	34859100	34859300	200	220.892	4.0095	0.000907548	0.65458	chip2_peak_13594
chr11	63922900	63923100	200	197.196	4.01047	0.000140551	1	chip1_peak_914
chr8	109716200	109716400	200	220.951	4.01057	0.000618482	0.622723	chip2_peak_9614
chr11	82141100	82141300	200	220.979	4.01108	0.000785882	0.643976	chip2_peak_11900
chr9	105401900	105402100	200	220.995	4.01137	0.000949731	0.656758	chip2_peak_14207
chr1	131960200	131960500	300	197.251	4.01159	0.000757748	1	chip1_peak_5002
chr4	119919700	119919900	200	221.044	4.01226	0.000932246	0.654719	chip2_peak_13980
chr6	112740000	112740200	200	221.046	4.0123	9.20122e-05	0.365957	chip2_peak_2261
chr6	27883900	27884100	200	221.06	4.01256	7.07908e-05	0.335892	chip2_peak_1867
chr11	16714700	16714900	200	197.304	4.01268	0.000137021	1	chip1_peak_894
chr13	24173900	24174100	200	221.072	4.01277	0.000236786	0.501062	chip2_peak_4382
chr9	45979400	45979600	200	197.31	4.0128	0.000703841	1	chip1_peak_4599
chr6	107698500	107698700	200	221.096	4.01321	0.000995701	0.659594	chip2_peak_14853
chr11	113269800	113270000	200	197.34	4.0134	0.000900155	1	chip1_peak_6045
chr1	59775900	59776100	200	197.341	4.01342	0.000894298	1	chip1_peak_5997
chr16	92348700	92349100	400	221.114	4.01353	0.000208282	0.485208	chip2_peak_3970
chr2	51719200	51719400	200	221.116	4.01356	0.000440125	0.585745	chip2_peak_7138
chr11	106908600	106908800	200	197.365	4.01391	0.000261781	1	chip1_peak_1665
chr19	46091200	46091400	200	197.37	4.01402	0.000319329	1	chip1_peak_2009
chr12	110410600	110410900	300	221.145	4.0141	7.14253e-05	0.336702	chip2_peak_1884
chr7	122414600	122414900	300	221.193	4.01496	0.000797739	0.645299	chip2_peak_12077
chr5	134193700	134193900	200	221.217	4.0154	0.000778263	0.643976	chip2_peak_11779
chr16	16307700	16308100	400	221.223	4.01551	2.99038e-05	0.230452	chip2_peak_1113
chr17	3119400	3119600	200	221.227	4.01558	0.000574523	0.612507	chip2_peak_9050
chr15	73429300	73429500	200	221.234	4.0157	0.000990436	0.658878	chip2_peak_14787
chr7	43477700	43477900	200	221.234	4.0157	0.000990436	0.658878	chip2_peak_14788
chr6	101348700	101348900	200	221.259	4.01617	0.000703973	0.633103	chip2_peak_10824
chr4	128184800	128185000	200	197.483	4.01631	0.000701822	1	chip1_peak_4583
chr1	8184900	8185100	200	221.274	4.01644	0.000927488	0.65458	chip2_peak_13905
chr11	33934800	33935100	300	197.491	4.01648	0.000928977	1	chip1_peak_6283
chr19	41789600	41789800	200	221.296	4.01683	0.000387599	0.569636	chip2_peak_6434
chr5	33918700	33919000	300	221.311	4.0171	0.000254366	0.512067	chip2_peak_4617
chr1	131329300	131329500	200	221.325	4.01735	0.000325871	0.549001	chip2_peak_5586
chr5	96535600	96535800	200	197.544	4.01754	0.000211784	1	chip1_peak_1343
chr7	98922900	98923100	200	197.555	4.01778	0.000790257	1	chip1_peak_5262
chr1	116570000	116570200	200	221.349	4.01779	0.000504457	0.599984	chip2_peak_8033
chr12	69781200	69781400	200	197.568	4.01804	0.000789801	1	chip1_peak_5255
chr16	14181300	14181500	200	197.568	4.01805	0.000784671	1	chip1_peak_5212
chr1	152856900	152857100	200	197.569	4.01807	0.000779574	1	chip1_peak_5170
chr12	64037000	64037200	200	197.569	4.01807	0.000832541	1	chip1_peak_5555
chr19	53553400	53553600	200	221.366	4.01809	0.000128897	0.412917	chip2_peak_2834
chr16	17056000	17056200	200	221.371	4.01819	0.000985199	0.658415	chip2_peak_14714
chr15	98709100	98709300	200	197.582	4.01833	0.000890603	1	chip1_peak_5970
chr10	21452100	21452300	200	197.583	4.01835	0.000884809	1	chip1_peak_5930
chr11	88168900	88169100	200	197.585	4.01838	0.000779364	1	chip1_peak_5164
chr15	59332500	59332800	300	197.607	4.01884	0.00027382	1	chip1_peak_1742
chr8	47825600	47825800	200	221.435	4.01936	0.000551865	0.609269	chip2_peak_8718
chr9	100084700	100084900	200	221.44	4.01944	0.000982591	0.658053	chip2_peak_14681
chr1	189344300	189344500	200	221.47	4.01999	0.000389889	0.569938	chip2_peak_6473
chr3	64981900	64982100	200	221.492	4.02039	0.000295752	0.532796	chip2_peak_5203
chr6	71428900	71429100	200	221.496	4.02046	0.000421695	0.580852	chip2_peak_6890
chr9	119734100	119734300	200	221.496	4.02046	0.000657184	0.628032	chip2_peak_10157
chr7	68297400	68297600	200	221.497	4.02049	0.000550414	0.609223	chip2_peak_8690
chr14	74762700	74763000	300	221.54	4.02126	0.000177946	0.458948	chip2_peak_3567
chr1	132148200	132148600	400	197.732	4.02138	0.00021761	1	chip1_peak_1385
chr12	21340000	21340300	300	221.547	4.02139	0.000431918	0.583311	chip2_peak_7029
chr18	16765100	16765300	200	197.742	4.02158	0.000977949	1	chip1_peak_6654
chr12	40751900	40752100	200	221.559	4.02161	0.000548968	0.608737	chip2_peak_8675
chr11	25860200	25860400	200	221.587	4.02211	0.000431936	0.583311	chip2_peak_7031
chr4	125003000	125003200	200	221.591	4.02219	0.00021042	0.485669	chip2_peak_4007
chr1	119160700	119161000	300	221.598	4.02232	0.000151381	0.437287	chip2_peak_3156
chr15	30216000	30216300	300	221.601	4.02236	0.000301733	0.535644	chip2_peak_5279
chr15	26552000	26552200	200	221.614	4.02261	0.000419489	0.580397	chip2_peak_6855
chr7	130642000	130642200	200	197.805	4.02286	0.000781435	1	chip1_peak_5185
chr11	76819600	76819800	200	197.805	4.02287	0.00077636	1	chip1_peak_5135
chr6	72318700	72318900	200	221.628	4.02287	0.000715232	0.635167	chip2_peak_10956
chr17	26646700	26646900	200	221.642	4.02311	7.20825e-05	0.337407	chip2_peak_1902
chr7	57358100	57358400	300	221.649	4.02325	0.000182961	0.464414	chip2_peak_3630
chr12	103203100	103203300	200	197.825	4.02326	0.000881155	1	chip1_peak_5896
chr11	20065700	20065900	200	197.825	4.02326	0.000881155	1	chip1_peak_5897
chr4	136321600	136321800	200	197.825	4.02326	0.000881155	1	chip1_peak_5898
chr5	15462600	15462800	200	221.673	4.02368	0.00041839	0.579689	chip2_peak_6849
chr17	45681800	45682000	200	197.858	4.02394	0.000976518	1	chip1_peak_6645
chr13	95635700	95635900	200	197.94	4.02561	0.000670885	1	chip1_peak_4379
chr3	89015100	89015300	200	221.783	4.02567	0.000692386	0.632282	chip2_peak_10650
chr6	86685300	86685500	200	197.963	4.02607	0.000150394	1	chip1_peak_965
chr7	34968400	34968700	300	221.807	4.0261	0.000483132	0.594394	chip2_peak_7768
chr9	63881200	63881500	300	221.81	4.02616	0.000443111	0.586859	chip2_peak_7179
chr6	120495200	120495400	200	221.814	4.02623	0.000405107	0.573945	chip2_peak_6686
chr13	42133000	42133200	200	197.994	4.02671	0.000150129	1	chip1_peak_964
chr19	41508000	41508200	200	197.998	4.02678	0.000817626	1	chip1_peak_5448
chr4	153450000	153450200	200	221.854	4.02697	0.000530187	0.605076	chip2_peak_8391
chr9	61827500	61827700	200	198.009	4.02702	0.000182904	1	chip1_peak_1156
chr15	83481500	83481700	200	221.863	4.02713	0.000387775	0.569636	chip2_peak_6437
chr9	43201600	43201800	200	198.018	4.02719	0.000884373	1	chip1_peak_5919
chr17	43758400	43758600	200	198.018	4.02719	0.000681353	1	chip1_peak_4463
chr15	66270400	66270600	200	221.869	4.02723	0.000777032	0.643976	chip2_peak_11760
chr12	112255800	112256100	300	221.873	4.0273	0.000304289	0.536517	chip2_peak_5318
chr14	66816600	66816800	200	198.042	4.02768	0.00077316	1	chip1_peak_5111
chr8	124717300	124717500	200	198.052	4.02788	0.000178694	1	chip1_peak_1129
chr7	35672700	35672900	200	198.067	4.02819	0.000871809	1	chip1_peak_5825
chr6	38784300	38784500	200	198.067	4.02819	0.000871809	1	chip1_peak_5826
chr1	121439600	121439900	300	221.993	4.02948	0.000356812	0.56046	chip2_peak_6024
chr16	48996000	48996200	200	221.995	4.02952	0.000592015	0.617171	chip2_peak_9265
chr14	12100200	12100500	300	222.006	4.02972	9.10132e-06	0.127638	chip2_peak_600
chr6	97921700	97921900	200	198.156	4.02999	0.000683951	1	chip1_peak_4475
chr11	95279600	95279800	200	222.023	4.03003	0.000797141	0.645299	chip2_peak_12067
chr11	79223800	79224000	200	198.159	4.03005	7.45101e-05	1	chip1_peak_523
chr7	28420100	28420300	200	222.03	4.03015	0.000254634	0.512137	chip2_peak_4622
chr6	51175500	51175700	200	222.058	4.03066	0.000590458	0.617162	chip2_peak_9242
chr15	8638900	8639100	200	198.241	4.03174	0.000977003	1	chip1_peak_6648
chr6	73387000	73387200	200	222.12	4.0318	0.000588906	0.616903	chip2_peak_9219
chr13	60286000	60286200	200	222.146	4.03226	0.000590565	0.617171	chip2_peak_9243
chr12	51815800	51816000	200	222.153	4.03239	0.000769469	0.643615	chip2_peak_11660
chr17	51587900	51588100	200	222.153	4.03239	0.000769469	0.643615	chip2_peak_11661
chr11	109580900	109581100	200	222.176	4.03281	0.000748813	0.639926	chip2_peak_11423
chr7	77860000	77860200	200	222.178	4.03284	0.000954742	0.657417	chip2_peak_14267
chr5	35075100	35075400	300	198.297	4.03288	0.000249151	1	chip1_peak_1586
chr11	113680700	113681000	300	222.19	4.03306	0.000815005	0.646726	chip2_peak_12325
chr8	116832600	116832800	200	222.207	4.03336	0.000475795	0.592903	chip2_peak_7663
chr17	32715800	32716000	200	222.213	4.03348	0.00097921	0.658047	chip2_peak_14625
chr1	53055900	53056200	300	198.337	4.03368	0.000501365	1	chip1_peak_3197
chr6	140470800	140471200	400	198.341	4.03376	0.000394606	1	chip1_peak_2485
chr11	4754800	4755000	200	222.245	4.03405	0.000320545	0.546023	chip2_peak_5521
chr4	3777700	3777900	200	198.356	4.03406	0.00020145	1	chip1_peak_1278
chr18	4675200	4675400	200	222.285	4.03478	0.000765416	0.64317	chip2_peak_11606
chr5	139959500	139959900	400	222.286	4.0348	1.99889e-05	0.191543	chip2_peak_881
chr3	124228000	124228200	200	222.302	4.03509	0.000319707	0.545479	chip2_peak_5513
chr14	33953200	33953400	200	222.307	4.03519	0.00074487	0.639086	chip2_peak_11369
chr18	42121600	42121800	200	222.307	4.03519	0.00074487	0.639086	chip2_peak_11370
chr15	27792900	27793100	200	222.315	4.03534	0.000105968	0.384489	chip2_peak_2492
chr6	38826900	38827100	200	222.321	4.03544	0.000290871	0.531461	chip2_peak_5120
chr4	148293300	148293600	300	222.333	4.03566	0.000618537	0.622723	chip2_peak_9616
chr3	123759300	123759500	200	222.334	4.03567	0.000746974	0.639428	chip2_peak_11401
chr5	119974500	119974700	200	198.451	4.036	0.000419599	1	chip1_peak_2672
chr17	88041400	88041600	200	222.377	4.03646	0.000290112	0.531461	chip2_peak_5105
chr1	6330500	6330700	200	222.396	4.0368	0.000282407	0.528259	chip2_peak_4994
chr18	70093900	70094100	200	222.42	4.03724	0.000971458	0.657711	chip2_peak_14516
chr6	108619300	108619500	200	222.42	4.03724	0.000971458	0.657711	chip2_peak_14517
chr8	108134600	108134800	200	222.42	4.03724	0.000971458	0.657711	chip2_peak_14518
chr9	72170300	72170500	200	222.439	4.03758	0.000740948	0.638827	chip2_peak_11310
chr7	66399100	66399300	200	222.442	4.03763	0.000882759	0.651913	chip2_peak_13278
chr3	108327700	108327900	200	222.484	4.03839	0.000553169	0.609845	chip2_peak_8732
chr1	90824900	90825100	200	222.489	4.03849	0.000968889	0.657711	chip2_peak_14479
chr5	20924500	20924700	200	222.509	4.03886	0.000880426	0.651913	chip2_peak_13240
chr2	85045900	85046100	200	222.512	4.0389	0.0009428	0.65602	chip2_peak_14114
chr8	109668600	109669000	400	222.557	4.03972	9.75519e-06	0.133104	chip2_peak_618
chr15	30940300	30940500	200	222.558	4.03974	0.000966326	0.657711	chip2_peak_14437
chr19	21847000	21847200	200	222.558	4.03974	0.000966326	0.657711	chip2_peak_14438
chr3	135385400	135385600	200	198.657	4.04019	0.000752098	1	chip1_peak_4959
chr5	129602300	129602500	200	222.598	4.04047	0.000816614	0.646865	chip2_peak_12348
chr12	29181100	29181300	200	222.603	4.04055	0.000477877	0.592997	chip2_peak_7697
chr2	68002400	68002700	300	198.686	4.04077	8.67383e-05	1	chip1_peak_609
chr5	45220800	45221000	200	222.64	4.04123	0.000686388	0.631413	chip2_peak_10569
chr6	104914900	104915100	200	222.649	4.0414	0.000937821	0.655357	chip2_peak_14049
chr16	8689900	8690100	200	222.658	4.04156	0.000172406	0.45392	chip2_peak_3490
chr13	55284800	55285100	300	198.733	4.04173	0.000125582	1	chip1_peak_824
chr2	31970700	31971000	300	198.752	4.04213	0.000475675	1	chip1_peak_3034
chr3	83980000	83980200	200	198.766	4.04241	0.000334656	1	chip1_peak_2109
chr5	33752800	33753000	200	222.732	4.0429	0.000388874	0.569818	chip2_peak_6452
chr4	12016300	12016500	200	222.77	4.04359	0.000682778	0.631012	chip2_peak_10518
chr4	56036600	56036800	200	222.773	4.04364	0.000398474	0.572401	chip2_peak_6592
chr5	27197500	27197700	200	222.79	4.04396	0.000507454	0.600207	chip2_peak_8081
chr14	30478800	30479000	200	198.85	4.04411	0.000672382	1	chip1_peak_4394
chr11	88566600	88566800	200	198.851	4.04414	0.000660096	1	chip1_peak_4303
chr5	35394200	35394400	200	198.894	4.04501	0.00074414	1	chip1_peak_4897
chr4	10706600	10706800	200	222.852	4.04508	0.000506123	0.600109	chip2_peak_8062
chr16	24549700	24550100	400	198.9	4.04512	0.000824065	1	chip1_peak_5486
chr9	9034600	9034800	200	222.864	4.0453	6.82733e-05	0.332482	chip2_peak_1814
chr2	117347000	117347200	200	222.89	4.04576	0.00080553	0.646243	chip2_peak_12172
chr19	41377800	41378000	200	198.941	4.04597	6.03409e-05	1	chip1_peak_442
chr3	58521500	58521700	200	222.914	4.04621	0.000288059	0.530927	chip2_peak_5068
chr5	117100300	117100500	200	198.984	4.04685	0.00032412	1	chip1_peak_2039
chr5	65483500	65483700	200	222.954	4.04694	0.000210561	0.485669	chip2_peak_4011
chr6	114375600	114375800	200	198.999	4.04715	0.000945669	1	chip1_peak_6421
chr17	74605400	74605600	200	222.975	4.04731	0.000503471	0.599984	chip2_peak_8016
chr13	108312200	108312400	200	223	4.04777	0.000504887	0.599984	chip2_peak_8041
chr2	84878000	84878200	200	223.01	4.04795	0.000444867	0.587523	chip2_peak_7201
chr8	64725600	64725800	200	199.049	4.04815	0.00072968	1	chip1_peak_4784
chr8	64726500	64726800	300	199.058	4.04834	6.25729e-07	0.124185	chip1_peak_34
chr1	179545200	179545500	300	223.043	4.04855	0.000126356	0.410169	chip2_peak_2794
chr11	43599700	43599900	200	223.048	4.04864	0.000657508	0.628032	chip2_peak_10162
chr5	141746800	141747000	200	199.082	4.04883	0.000927384	1	chip1_peak_6266
chr10	114794100	114794400	300	223.068	4.049	0.00038949	0.569818	chip2_peak_6465
chr16	44300600	44300800	200	223.098	4.04955	0.000500833	0.599984	chip2_peak_7973
chr8	54076400	54076600	200	223.101	4.0496	0.000605793	0.619602	chip2_peak_9461
chr4	32240400	32240600	200	199.131	4.04983	0.000736269	1	chip1_peak_4846
chrX	151999100	151999300	200	223.124	4.05001	0.000126196	0.410169	chip2_peak_2792
chr4	123903300	123903500	200	199.158	4.05038	0.000602371	1	chip1_peak_3916
chr16	24184300	24184600	300	199.163	4.05049	0.000166461	1	chip1_peak_1050
chr1	38491300	38491500	200	223.164	4.05074	0.000563731	0.610954	chip2_peak_8891
chr9	45240500	45240700	200	199.201	4.05126	0.000320541	1	chip1_peak_2015
chr9	119819900	119820100	200	223.242	4.05215	0.000652332	0.627287	chip2_peak_10097
chr11	75756200	75756400	200	199.27	4.05265	0.000722158	1	chip1_peak_4738
chr11	102902300	102902500	200	199.272	4.0527	0.000731622	1	chip1_peak_4807
chr2	31033300	31033600	300	199.304	4.05335	0.000377794	1	chip1_peak_2391
chr19	47443700	47443900	200	199.332	4.05392	0.000461069	1	chip1_peak_2939
chr16	14318000	14318200	200	199.335	4.05398	0.000567887	1	chip1_peak_3658
chr13	71258000	71258200	200	199.339	4.05405	0.000813996	1	chip1_peak_5422
chr12	105873800	105874000	200	223.359	4.05428	0.000304533	0.536517	chip2_peak_5325
chr11	61359700	61359900	200	223.38	4.05466	0.000732595	0.638436	chip2_peak_11179
chr2	130394000	130394300	300	223.383	4.05472	0.000735889	0.638436	chip2_peak_11233
chrX	139585000	139585200	200	223.384	4.05473	0.000398165	0.572401	chip2_peak_6585
chr5	130296500	130296700	200	223.431	4.05558	6.46599e-05	0.326674	chip2_peak_1745
chr13	41223800	41224100	300	223.432	4.05561	0.000448749	0.587543	chip2_peak_7256
chr1	180821100	180821300	200	223.461	4.05613	0.00082512	0.648074	chip2_peak_12466
chr14	65477500	65477700	200	223.473	4.05634	0.000302947	0.535938	chip2_peak_5301
chr1	43088000	43088200	200	223.496	4.05677	0.000196698	0.476309	chip2_peak_3812
chr17	31408900	31409100	200	199.478	4.05688	0.000276333	1	chip1_peak_1760
chr3	65062800	65063000	200	223.512	4.05706	0.000728741	0.638436	chip2_peak_11117
chr11	24363900	24364100	200	199.498	4.05729	0.000120491	1	chip1_peak_791
chr4	153500700	153500900	200	199.508	4.05749	0.00071919	1	chip1_peak_4714
chr10	44026000	44026200	200	223.562	4.05796	0.000395049	0.571518	chip2_peak_6542
chr1	14076800	14077000	200	223.567	4.05805	0.000929677	0.654701	chip2_peak_13938
chr10	82221300	82221600	300	223.572	4.05815	0.000266357	0.519631	chip2_peak_4786
chr7	72100400	72100600	200	199.568	4.05872	0.000816167	1	chip1_peak_5436
chr19	45439100	45439300	200	223.621	4.05904	0.000394015	0.571052	chip2_peak_6532
chr1	189011800	189012000	200	223.622	4.05905	0.000709321	0.633965	chip2_peak_10886
chr9	14652700	14653000	300	223.626	4.05912	0.000698074	0.632414	chip2_peak_10742
chr7	92094200	92094400	200	223.654	4.05963	7.44979e-05	0.340649	chip2_peak_1941
chr9	117535900	117536100	200	223.66	4.05975	0.000795448	0.645141	chip2_peak_12044
chr12	100872700	100872900	200	199.643	4.06024	0.000919852	1	chip1_peak_6205
chr4	106969600	106970100	500	199.655	4.06049	3.3632e-05	1	chip1_peak_282
chr6	140243400	140243600	200	199.655	4.06049	0.000907674	1	chip1_peak_6117
chr7	135053700	135053900	200	223.736	4.06113	0.000500447	0.599984	chip2_peak_7969
chr9	118415500	118415700	200	223.741	4.06122	9.97339e-05	0.378066	chip2_peak_2386
chr6	115734300	115734500	200	199.727	4.06196	0.000136752	1	chip1_peak_891
chr4	101820800	101821000	200	199.736	4.06212	0.000311898	1	chip1_peak_1953
chr8	114065300	114065600	300	199.746	4.06233	0.000337943	1	chip1_peak_2134
chr15	78970700	78970900	200	223.813	4.06252	0.000380518	0.56801	chip2_peak_6339
chr11	81828400	81828600	200	199.755	4.06253	0.000732607	1	chip1_peak_4815
chr9	116264600	116264800	200	199.757	4.06256	0.000711179	1	chip1_peak_4665
chr17	26786400	26786600	200	199.757	4.06256	0.000856574	1	chip1_peak_5714
chr19	16044700	16044900	200	199.771	4.06284	0.000706376	1	chip1_peak_4623
chr2	169085000	169085200	200	223.843	4.06306	0.000919891	0.65458	chip2_peak_13766
chr3	112096700	112096900	200	223.859	4.06335	0.00089514	0.652624	chip2_peak_13468
chr8	124114200	124114400	200	223.859	4.06335	0.00089514	0.652624	chip2_peak_13469
chr7	138706400	138706600	200	199.799	4.06341	0.000890233	1	chip1_peak_5963
chr1	160509800	160510100	300	199.801	4.06346	0.000581942	1	chip1_peak_3747
chr18	56455000	56455200	200	199.802	4.06348	0.000351057	1	chip1_peak_2220
chr9	74853600	74853800	200	199.81	4.06365	0.000807526	1	chip1_peak_5388
chr1	10162200	10162500	300	199.812	4.06367	0.000519014	1	chip1_peak_3322
chr2	91015200	91015400	200	199.822	4.06387	0.000801817	1	chip1_peak_5346
chr8	33639400	33639600	200	199.824	4.06391	0.000807061	1	chip1_peak_5384
chr6	22323000	22323200	200	199.828	4.064	0.000241886	1	chip1_peak_1547
chr19	9037800	9038000	200	199.835	4.06415	0.000796394	1	chip1_peak_5306
chr5	112044100	112044300	200	223.912	4.06431	0.000917461	0.65458	chip2_peak_13728
chr9	110072900	110073100	200	223.922	4.0645	0.00049652	0.598657	chip2_peak_7931
chr18	65301600	65301800	200	223.926	4.06457	0.000162622	0.443866	chip2_peak_3355
chr7	142985400	142985600	200	223.927	4.0646	0.00094405	0.656297	chip2_peak_14129
chr8	85562300	85562500	200	223.938	4.06479	0.000206063	0.483028	chip2_peak_3948
chr1	25185600	25185800	200	223.943	4.06488	0.000226423	0.493627	chip2_peak_4258
chr1	106546100	106546300	200	223.945	4.06491	0.000368451	0.564481	chip2_peak_6180
chr3	130807900	130808200	300	199.88	4.06506	0.000467422	1	chip1_peak_2977
chr4	120968900	120969100	200	199.882	4.06511	0.000561186	1	chip1_peak_3617
chrX	139868300	139868500	200	223.956	4.06512	0.000188072	0.467912	chip2_peak_3703
chr11	76485800	76486200	400	223.959	4.06518	0.000868093	0.651913	chip2_peak_13035
chr15	32187700	32187900	200	199.891	4.06528	0.000910099	1	chip1_peak_6133
chr16	33319100	33319300	200	199.903	4.06553	0.000104975	1	chip1_peak_724
chr1	132698100	132698300	200	199.915	4.06577	0.000758549	1	chip1_peak_5011
chr19	38995800	38996000	200	199.915	4.06577	0.000838867	1	chip1_peak_5600
chr2	34485400	34485600	200	199.916	4.06579	0.00034906	1	chip1_peak_2211
chr11	102373300	102373500	200	223.997	4.06587	0.000481994	0.593867	chip2_peak_7754
chr1	66446000	66446200	200	223.997	4.06587	0.000481994	0.593867	chip2_peak_7755
chr18	38797000	38797200	200	224.038	4.0666	0.000351782	0.558025	chip2_peak_5963
chr8	106560100	106560300	200	224.038	4.06661	7.21311e-05	0.337407	chip2_peak_1904
chr4	35837500	35837700	200	224.039	4.06663	0.000920231	0.65458	chip2_peak_13769
chr1	152381500	152381700	200	224.046	4.06674	0.000493921	0.598392	chip2_peak_7892
chr4	136444600	136444900	300	199.982	4.06714	0.000281651	1	chip1_peak_1776
chr7	99538200	99538400	200	199.994	4.06738	0.000981404	1	chip1_peak_6683
chr13	25727700	25728000	300	224.083	4.06742	0.000326919	0.549872	chip2_peak_5598
chr16	32420300	32420500	200	200.001	4.06752	0.000268894	1	chip1_peak_1712
chr5	64294500	64294700	200	224.1	4.06772	0.00037867	0.567617	chip2_peak_6309
chr18	52018000	52018200	200	224.107	4.06786	0.000492626	0.598121	chip2_peak_7872
chr19	57739400	57739600	200	224.12	4.0681	0.000479471	0.593161	chip2_peak_7717
chr5	21933800	21934000	200	224.12	4.0681	0.000479471	0.593161	chip2_peak_7718
chr1	159896700	159896900	200	224.12	4.0681	0.000479471	0.593161	chip2_peak_7719
chr7	144758600	144758800	200	200.074	4.06901	0.000508973	1	chip1_peak_3252
chr2	71610800	71611200	400	200.076	4.06906	0.000321194	1	chip1_peak_2019
chr10	110912100	110912400	300	200.109	4.06972	0.00017313	1	chip1_peak_1093
chr10	63701800	63702000	200	224.212	4.06976	0.000785443	0.643976	chip2_peak_11889
chr13	101786900	101787100	200	200.139	4.07033	0.000900452	1	chip1_peak_6052
chr12	103450000	103450200	200	200.147	4.07049	0.000649122	1	chip1_peak_4233
chr8	128270700	128270900	200	200.149	4.07053	0.00062204	1	chip1_peak_4047
chr11	119643600	119643800	200	200.202	4.0716	0.000431473	1	chip1_peak_2743
chr13	102584300	102584600	300	224.315	4.07163	0.000396235	0.571533	chip2_peak_6562
chr16	20151000	20151200	200	224.317	4.07166	0.000584966	0.616289	chip2_peak_9160
chr7	125813800	125814000	200	224.323	4.07177	0.000820363	0.64753	chip2_peak_12399
chr5	19370000	19370200	200	224.323	4.07177	0.000820363	0.64753	chip2_peak_12400
chr9	102500200	102500400	200	224.323	4.07177	0.000820363	0.64753	chip2_peak_12401
chr14	121327200	121327400	200	224.324	4.0718	0.00010693	0.385999	chip2_peak_2504
chr15	31185700	31185900	200	224.331	4.07192	0.000598133	0.617901	chip2_peak_9358
chr15	74348300	74348500	200	200.226	4.07209	0.000798425	1	chip1_peak_5318
chr9	75610900	75611100	200	200.233	4.07224	0.000700775	1	chip1_peak_4569
chr10	120646800	120647000	200	224.355	4.07235	2.46615e-05	0.211419	chip2_peak_995
chr15	77085500	77085700	200	224.39	4.073	0.000818199	0.647209	chip2_peak_12368
chr4	148658700	148658900	200	224.405	4.07327	0.000624541	0.623835	chip2_peak_9703
chr10	128815300	128815500	200	200.286	4.07332	0.000553667	1	chip1_peak_3574
chr1	120250600	120250900	300	224.411	4.07338	0.000108693	0.386654	chip2_peak_2546
chr5	113309600	113309800	200	200.302	4.07365	0.000985639	1	chip1_peak_6712
chr7	113036900	113037100	200	200.308	4.07377	0.00079007	1	chip1_peak_5259
chr10	87750400	87750700	300	224.453	4.07414	0.00065832	0.628032	chip2_peak_10178
chr6	115076900	115077100	200	224.473	4.0745	0.00044086	0.586004	chip2_peak_7149
chr14	57859600	57859800	200	224.484	4.0747	0.000157337	0.441282	chip2_peak_3261
chr18	68224300	68224500	200	224.492	4.07484	7.21262e-05	0.337407	chip2_peak_1903
chr18	44616900	44617200	300	224.509	4.07515	0.000463861	0.590485	chip2_peak_7492
chr8	13611800	13612000	200	200.392	4.07547	0.000995208	1	chip1_peak_6789
chr9	46236700	46236900	200	224.534	4.0756	0.000439706	0.585682	chip2_peak_7133
chr5	38415400	38415600	200	224.535	4.07562	0.000621263	0.623354	chip2_peak_9652
chr1	99748800	99749000	200	224.535	4.07562	0.000621263	0.623354	chip2_peak_9653
chr11	18895600	18895800	200	224.542	4.07576	0.000895577	0.65264	chip2_peak_13473
chr8	14216700	14217000	300	200.42	4.07604	0.000678725	1	chip1_peak_4442
chr8	120238400	120238600	200	224.56	4.07607	0.000440941	0.586004	chip2_peak_7150
chr5	75152800	75153000	200	224.58	4.07644	0.00011652	0.399132	chip2_peak_2652
chr11	51470900	51471300	400	200.444	4.07652	0.000242525	1	chip1_peak_1550
chr19	4459000	4459200	200	224.594	4.07669	0.000811744	0.646352	chip2_peak_12283
chr11	118511700	118511900	200	200.459	4.07684	0.000251695	1	chip1_peak_1604
chr2	79414600	79414800	200	224.607	4.07693	0.000377256	0.567343	chip2_peak_6294
chr11	62493200	62493500	300	224.618	4.07712	8.18597e-05	0.348548	chip2_peak_2091
chr8	53988700	53988900	200	224.623	4.07723	0.000869189	0.651913	chip2_peak_13043
chr6	65156300	65156500	200	224.644	4.0776	0.00028708	0.530577	chip2_peak_5054
chr9	113695900	113696100	200	224.651	4.07773	0.000116541	0.399132	chip2_peak_2653
chr2	178287400	178287700	300	224.658	4.07786	0.000248617	0.507706	chip2_peak_4544
chr1	79683300	79683500	200	224.676	4.07819	0.000366251	0.563399	chip2_peak_6154
chr8	61278900	61279100	200	224.691	4.07845	0.000811895	0.646371	chip2_peak_12287
chr15	83512800	83513000	200	200.539	4.07847	0.000232926	1	chip1_peak_1491
chr7	98063200	98063400	200	200.563	4.07896	0.000130342	1	chip1_peak_849
chr18	35036700	35036900	200	200.611	4.07994	0.000871076	1	chip1_peak_5816
chr5	23795200	23795400	200	200.616	4.08003	0.000539901	1	chip1_peak_3471
chr15	64116200	64116400	200	200.636	4.08044	0.000326064	1	chip1_peak_2058
chr12	105649700	105649900	200	224.804	4.0805	0.000150815	0.437113	chip2_peak_3146
chr5	34409300	34409500	200	200.642	4.08055	0.000978234	1	chip1_peak_6659
chr13	75766400	75766600	200	224.826	4.08091	5.33841e-05	0.299212	chip2_peak_1574
chr9	68304100	68304300	200	224.844	4.08124	0.000373328	0.566295	chip2_peak_6237
chr2	6097900	6098200	300	224.864	4.08159	0.000271996	0.52388	chip2_peak_4848
chr12	4989200	4989400	200	224.871	4.08173	0.000890738	0.651913	chip2_peak_13413
chr1	178389400	178389600	200	200.705	4.08184	0.000766517	1	chip1_peak_5075
chr10	62872700	62872900	200	224.897	4.0822	0.000234541	0.500012	chip2_peak_4352
chr15	86305600	86305800	200	224.928	4.08275	0.000432308	0.583311	chip2_peak_7035
chr16	78474600	78474800	200	224.928	4.08275	0.000571904	0.61146	chip2_peak_9024
chr16	70414900	70415100	200	200.76	4.08296	0.000600894	1	chip1_peak_3899
chr11	34274300	34274500	200	200.769	4.08315	0.00059298	1	chip1_peak_3848
chr16	7150400	7150600	200	200.783	4.08342	0.000875899	1	chip1_peak_5854
chr10	40244100	40244300	200	200.79	4.08357	0.000872067	1	chip1_peak_5828
chr3	45056800	45057100	300	224.98	4.08371	0.000533675	0.605729	chip2_peak_8438
chr3	82945500	82945700	200	200.802	4.08381	0.000868061	1	chip1_peak_5805
chr10	42410700	42410900	200	224.989	4.08387	0.000880381	0.651913	chip2_peak_13236
chr5	107689900	107690100	200	224.989	4.08387	0.000880381	0.651913	chip2_peak_13237
chr2	178630700	178630900	200	200.818	4.08413	0.000443575	1	chip1_peak_2813
chr11	103239700	103240000	300	225.027	4.08456	0.000126804	0.410496	chip2_peak_2805
chr3	30015600	30015800	200	200.842	4.08463	0.000672917	1	chip1_peak_4398
chr2	4553800	4554000	200	225.031	4.08463	0.000799746	0.645695	chip2_peak_12096
chr8	122740500	122740700	200	225.036	4.08472	0.000516508	0.601848	chip2_peak_8209
chr10	83062400	83062600	200	225.058	4.08513	0.000878058	0.651913	chip2_peak_13194
chr5	45779700	45779900	200	225.058	4.08513	0.000878058	0.651913	chip2_peak_13195
chr5	74121100	74121300	200	225.058	4.08513	0.000949878	0.656758	chip2_peak_14211
chr18	77095100	77095300	200	225.072	4.08538	0.000472865	0.592894	chip2_peak_7610
chr7	114222200	114222500	300	225.075	4.08542	0.000128739	0.412778	chip2_peak_2832
chr3	115723200	115723500	300	225.075	4.08544	0.000521003	0.602808	chip2_peak_8263
chr5	140166300	140166500	200	200.898	4.08577	0.000293898	1	chip1_peak_1844
chr9	73130800	73131000	200	200.898	4.08577	0.000306114	1	chip1_peak_1910
chr15	54071800	54072000	200	225.127	4.08638	0.000875741	0.651913	chip2_peak_13161
chr9	3218900	3219100	200	225.127	4.08638	0.000875741	0.651913	chip2_peak_13162
chr12	102893700	102893900	200	225.143	4.08667	0.000119276	0.402332	chip2_peak_2697
chr9	24431700	24431900	200	225.165	4.08706	0.000692925	0.632282	chip2_peak_10657
chr7	34923700	34923900	200	225.183	4.08738	0.000619047	0.622723	chip2_peak_9628
chr9	92148100	92148300	200	225.183	4.08738	0.000619047	0.622723	chip2_peak_9629
chr2	116367000	116367300	300	225.195	4.0876	0.000232385	0.498621	chip2_peak_4322
chr16	21304700	21304900	200	225.196	4.08763	0.000470392	0.592894	chip2_peak_7571
chr4	129910600	129910800	200	200.995	4.08774	0.000598434	1	chip1_peak_3882
chr17	78283000	78283200	200	201.015	4.08814	0.000355068	1	chip1_peak_2244
chr18	68198300	68198500	200	201.04	4.08865	0.000600389	1	chip1_peak_3894
chr4	125493100	125493300	200	225.266	4.08889	0.000456638	0.589025	chip2_peak_7391
chr2	134802500	134802700	200	201.054	4.08893	0.000854666	1	chip1_peak_5705
chr6	83769100	83769400	300	225.271	4.08899	0.000356537	0.56046	chip2_peak_6015
chr18	84961600	84961800	200	225.276	4.08907	0.000736382	0.638436	chip2_peak_11240
chr10	21332000	21332200	200	201.085	4.08958	0.000674532	1	chip1_peak_4407
chr1	69433700	69433900	200	201.093	4.08973	0.000738624	1	chip1_peak_4858
chr1	92332400	92332600	200	201.123	4.09033	0.000583198	1	chip1_peak_3758
chr3	62801200	62801400	200	225.348	4.09038	0.000842603	0.649182	chip2_peak_12702
chr10	76349100	76349300	200	225.37	4.09079	0.00024573	0.505525	chip2_peak_4506
chr7	114505400	114505700	300	225.371	4.09081	6.01904e-05	0.316528	chip2_peak_1673
chr9	63980600	63980800	200	225.376	4.09089	0.000559986	0.610954	chip2_peak_8829
chr1	144104400	144104600	200	225.385	4.09106	0.00059774	0.617901	chip2_peak_9354
chr17	74965200	74965400	200	225.395	4.09124	0.000873757	0.651913	chip2_peak_13118
chr3	101444600	101444800	200	201.18	4.0915	0.000760441	1	chip1_peak_5026
chr5	88400200	88400400	200	225.416	4.09161	0.000455527	0.588741	chip2_peak_7376
chr4	129025300	129025500	200	225.424	4.09177	0.00032194	0.546824	chip2_peak_5535
chr4	139088100	139088300	200	225.429	4.09185	0.000456869	0.589166	chip2_peak_7394
chr3	52954200	52954400	200	225.44	4.09205	0.000558516	0.610884	chip2_peak_8810
chr11	106020100	106020300	200	225.45	4.09223	0.00059617	0.617639	chip2_peak_9331
chr6	54280500	54280700	200	201.234	4.0926	0.000285232	1	chip1_peak_1797
chr16	94150500	94150700	200	201.266	4.09324	0.00081064	1	chip1_peak_5404
chr4	137119000	137119200	200	201.301	4.09395	0.000946648	1	chip1_peak_6426
chr2	179805200	179805400	200	225.562	4.09427	0.000854279	0.650894	chip2_peak_12866
chr7	141659500	141659700	200	201.33	4.09455	0.000250895	1	chip1_peak_1599
chr1	187272100	187272300	200	225.595	4.09486	0.000753866	0.64033	chip2_peak_11492
chr5	32227800	32228000	200	225.607	4.09508	0.000594716	0.617552	chip2_peak_9306
chr7	112766800	112767100	300	225.616	4.09525	0.000926092	0.65458	chip2_peak_13874
chr11	79690200	79690500	300	225.635	4.09559	1.73481e-05	0.180636	chip2_peak_810
chr4	48114700	48114900	200	225.643	4.09574	0.000591488	0.617171	chip2_peak_9253
chr8	56202500	56202700	200	225.644	4.09576	0.000274197	0.524803	chip2_peak_4880
chr19	52627200	52627400	200	225.652	4.0959	0.000788222	0.643989	chip2_peak_11941
chrX	73736100	73736400	300	225.68	4.09641	3.00948e-05	0.230977	chip2_peak_1119
chr4	96627200	96627400	200	225.682	4.09644	0.000781202	0.643976	chip2_peak_11819
chr5	103929300	103929500	200	225.682	4.09644	0.000837167	0.64881	chip2_peak_12637
chr16	41510900	41511300	400	225.685	4.0965	2.47898e-05	0.211852	chip2_peak_998
chr16	16989200	16989400	200	201.436	4.0967	0.000884502	1	chip1_peak_5923
chr19	12603000	12603200	200	201.456	4.09711	0.000654642	1	chip1_peak_4266
chr16	52152500	52152700	200	225.72	4.09713	0.000776947	0.643976	chip2_peak_11756
chr3	18374900	18375100	200	225.72	4.09713	0.000776947	0.643976	chip2_peak_11757
chr9	49617500	49617700	200	225.72	4.09713	0.000776947	0.643976	chip2_peak_11758
chr11	18696700	18696900	200	201.459	4.09717	0.000585889	1	chip1_peak_3782
chr6	145235100	145235300	200	201.459	4.09717	0.000585889	1	chip1_peak_3783
chr5	147929300	147929500	200	201.459	4.09717	0.000585889	1	chip1_peak_3784
chr18	12433900	12434100	200	201.484	4.09767	0.000138808	1	chip1_peak_901
chr15	96909100	96909300	200	201.512	4.09826	0.000883346	1	chip1_peak_5911
chr11	102835600	102835800	200	225.787	4.09836	0.000416603	0.578849	chip2_peak_6827
chr13	97782100	97782300	200	225.788	4.09836	0.000774901	0.643976	chip2_peak_11724
chr12	118791600	118791800	200	225.797	4.09854	5.04968e-05	0.292898	chip2_peak_1515
chr5	28375100	28375300	200	201.542	4.09887	0.00031233	1	chip1_peak_1958
chr17	72049800	72050000	200	225.816	4.09888	0.000143339	0.429035	chip2_peak_3050
chr5	13515300	13515500	200	225.833	4.09919	0.00065627	0.628007	chip2_peak_10148
chr16	35428900	35429100	200	201.558	4.0992	0.000297306	1	chip1_peak_1864
chr12	75589800	75590100	300	225.834	4.0992	0.000641198	0.625985	chip2_peak_9934
chr9	66846400	66846600	200	201.588	4.09979	0.000737364	1	chip1_peak_4849
chr12	39906800	39907000	200	201.588	4.09979	0.000757224	1	chip1_peak_4999
chr4	107631300	107631500	200	201.591	4.09985	0.000122878	1	chip1_peak_806
chr13	23972700	23973000	300	201.602	4.10008	0.000588902	1	chip1_peak_3818
chr3	116788900	116789100	200	201.603	4.1001	0.000458622	1	chip1_peak_2919
chr10	60087400	60087600	200	225.901	4.10042	0.0008232	0.647825	chip2_peak_12438
chr7	18880600	18880800	200	225.953	4.10137	0.000438349	0.585292	chip2_peak_7114
chr4	115775100	115775300	200	225.966	4.1016	9.23784e-05	0.365957	chip2_peak_2270
chr12	75734000	75734200	200	225.979	4.10183	0.000222873	0.491951	chip2_peak_4198
chr14	93034900	93035300	400	225.984	4.10193	0.000142923	0.42873	chip2_peak_3042
chr1	58305800	58306100	300	226.013	4.10246	0.000889577	0.651913	chip2_peak_13393
chr5	138197800	138198000	200	201.729	4.10267	0.000559922	1	chip1_peak_3611
chr17	78972800	78973000	200	226.027	4.10271	9.82455e-05	0.375853	chip2_peak_2359
chr12	104187800	104188000	200	201.744	4.10297	0.000761901	1	chip1_peak_5040
chr14	45488100	45488300	200	201.757	4.10324	0.000316014	1	chip1_peak_1982
chr15	76623400	76623600	200	201.765	4.10339	2.6893e-06	0.316011	chip1_peak_68
chr4	129280300	129280600	300	201.769	4.10347	0.000763746	1	chip1_peak_5058
chr9	37052500	37052700	200	226.099	4.10402	0.000452726	0.58805	chip2_peak_7335
chr3	106974200	106974400	200	226.108	4.10417	0.000820992	0.647586	chip2_peak_12404
chr15	16491300	16491500	200	201.846	4.10504	0.000641531	1	chip1_peak_4177
chr11	45303100	45303400	300	226.265	4.10702	0.000192459	0.472291	chip2_peak_3760
chr11	59178600	59178800	200	226.266	4.10704	0.000236605	0.501027	chip2_peak_4380
chr15	15868200	15868400	200	201.96	4.10737	0.000931653	1	chip1_peak_6307
chr7	49698800	49699000	200	226.285	4.10739	0.000449182	0.587543	chip2_peak_7269
chr1	187465800	187466100	300	201.965	4.10747	0.000616171	1	chip1_peak_4000
chr12	67735000	67735200	200	226.324	4.10811	0.000667136	0.628727	chip2_peak_10302
chr9	62706800	62707000	200	202.051	4.10922	0.000747351	1	chip1_peak_4922
chr10	61386700	61386900	200	202.051	4.10922	0.000955797	1	chip1_peak_6491
chr3	107083700	107083900	200	226.389	4.10928	0.000589498	0.61714	chip2_peak_9225
chr14	122054100	122054300	200	202.06	4.1094	0.000726781	1	chip1_peak_4767
chr7	123117300	123117500	200	226.407	4.1096	0.000534589	0.605729	chip2_peak_8456
chr7	55999300	55999500	200	202.071	4.10963	0.000721872	1	chip1_peak_4735
chr18	76285100	76285300	200	226.412	4.1097	0.000833761	0.648347	chip2_peak_12590
chr5	102846600	102846800	200	226.412	4.1097	0.000833761	0.648347	chip2_peak_12591
chr13	76833700	76833900	200	202.1	4.1102	0.000623887	1	chip1_peak_4063
chr3	51844200	51844400	200	226.47	4.11075	0.00053319	0.605729	chip2_peak_8433
chr13	18226000	18226200	200	226.481	4.11095	0.000922702	0.65458	chip2_peak_13816
chr4	40963600	40963800	200	226.483	4.11098	0.000492725	0.598121	chip2_peak_7875
chr14	59214100	59214300	200	226.52	4.11165	0.000898001	0.653326	chip2_peak_13494
chr14	121617700	121617900	200	226.531	4.11185	0.000574525	0.612507	chip2_peak_9051
chr12	103157400	103157600	200	226.534	4.11191	0.000432644	0.583311	chip2_peak_7043
chr12	34280300	34280500	200	202.194	4.11212	0.000854376	1	chip1_peak_5703
chr11	121287800	121288100	300	202.2	4.11224	4.71238e-05	1	chip1_peak_362
chr18	67650800	67651000	200	226.562	4.11243	0.000255934	0.512807	chip2_peak_4644
chr8	12257000	12257200	200	202.213	4.11252	0.000921785	1	chip1_peak_6220
chr4	8521600	8521800	200	226.586	4.11285	0.000569222	0.611324	chip2_peak_8982
chr12	28710600	28710800	200	226.611	4.11331	0.00036492	0.562551	chip2_peak_6142
chr11	53748700	53749000	300	202.282	4.1139	2.00251e-05	0.886225	chip1_peak_192
chr6	90775000	90775300	300	202.284	4.11395	0.000494476	1	chip1_peak_3153
chr14	121080700	121080900	200	202.302	4.11432	0.000719108	1	chip1_peak_4713
chr13	41640100	41640400	300	202.307	4.11443	0.000355777	1	chip1_peak_2252
chr2	25035000	25035300	300	202.347	4.11522	0.000783241	1	chip1_peak_5204
chr17	35643700	35643900	200	226.725	4.11538	0.000102577	0.380181	chip2_peak_2441
chr10	12857100	12857300	200	226.728	4.11543	0.000343612	0.556193	chip2_peak_5832
chr17	31338000	31338200	200	202.363	4.11556	0.000212891	1	chip1_peak_1353
chr13	99698700	99699000	300	202.368	4.11566	0.000541582	1	chip1_peak_3489
chr16	13639500	13639800	300	226.742	4.11568	0.000572928	0.611939	chip2_peak_9033
chr19	41584700	41584900	200	202.385	4.11601	0.000604943	1	chip1_peak_3933
chr19	50483500	50483700	200	226.779	4.11636	0.000564756	0.610954	chip2_peak_8907
chr17	83933300	83933500	200	202.412	4.11655	0.000635676	1	chip1_peak_4145
chr10	57663800	57664000	200	202.438	4.11709	0.000545648	1	chip1_peak_3522
chr6	115862400	115862700	300	226.834	4.11736	7.4061e-05	0.340649	chip2_peak_1932
chr11	78380800	78381000	200	226.844	4.11754	0.000563275	0.610954	chip2_peak_8879
chr13	111435400	111435600	200	226.859	4.1178	0.000397848	0.572401	chip2_peak_6581
chr13	9533100	9533300	200	226.862	4.11787	0.000798036	0.645299	chip2_peak_12080
chr1	55700200	55700400	200	226.876	4.11812	0.00064073	0.625985	chip2_peak_9919
chr12	7751800	7752000	200	226.914	4.1188	0.000891305	0.651991	chip2_peak_13423
chr10	83917500	83917700	200	226.938	4.11924	0.000563381	0.610954	chip2_peak_8882
chr14	124480800	124481000	200	226.938	4.11924	0.000173528	0.455657	chip2_peak_3499
chr16	38449500	38449700	200	226.943	4.11934	0.000775501	0.643976	chip2_peak_11732
chr3	107669300	107669500	200	226.947	4.11941	0.000397923	0.572401	chip2_peak_6582
chr10	107311900	107312100	200	202.553	4.11942	0.000631679	1	chip1_peak_4124
chr6	71971700	71972000	300	202.564	4.11965	0.000352142	1	chip1_peak_2228
chr3	133317000	133317200	200	202.571	4.11979	0.000610809	1	chip1_peak_3968
chr19	10898100	10898300	200	202.574	4.11985	0.000817325	1	chip1_peak_5444
chr2	127439000	127439200	200	226.982	4.12004	0.000739769	0.638827	chip2_peak_11285
chr14	105483300	105483600	300	226.997	4.12032	3.79729e-05	0.257699	chip2_peak_1280
chr1	159547100	159547400	300	227.003	4.12042	0.000701225	0.632997	chip2_peak_10780
chr17	28156500	28156700	200	227.013	4.1206	0.000741861	0.638827	chip2_peak_11322
chr3	26849000	26849200	200	227.013	4.1206	0.000741861	0.638827	chip2_peak_11323
chr15	74349600	74349800	200	227.053	4.12133	0.000502872	0.599984	chip2_peak_8006
chr14	98874900	98875200	300	202.652	4.12143	0.000396249	1	chip1_peak_2496
chr9	64246100	64246300	200	202.657	4.12154	0.000550982	1	chip1_peak_3561
chr13	54864200	54864500	300	202.661	4.12161	0.000367827	1	chip1_peak_2322
chr7	98515800	98516000	200	202.661	4.12163	0.000482218	1	chip1_peak_3071
chr11	98813500	98813700	200	227.08	4.12183	0.00073991	0.638827	chip2_peak_11289
chr1	179352500	179353000	500	227.095	4.12209	4.46776e-05	0.277318	chip2_peak_1407
chr11	5847700	5847900	200	202.685	4.12211	0.00099323	1	chip1_peak_6774
chr1	129500200	129500500	300	227.097	4.12213	0.000431843	0.583311	chip2_peak_7026
chr14	65042200	65042400	200	227.112	4.12239	0.000811778	0.646352	chip2_peak_12285
chr8	118858400	118858600	200	227.112	4.12241	0.000394864	0.57143	chip2_peak_6540
chr15	59312200	59312400	200	202.714	4.12271	0.000896498	1	chip1_peak_6016
chr10	127783900	127784100	200	202.728	4.12298	0.000895981	1	chip1_peak_6010
chr5	105882400	105882600	200	202.73	4.12303	0.000704315	1	chip1_peak_4601
chr7	83069500	83069700	200	227.148	4.12306	0.000737964	0.638649	chip2_peak_11266
chr12	99320600	99320800	200	227.239	4.12472	0.000999594	0.66033	chip2_peak_14899
chr10	111360200	111360400	200	227.25	4.1249	0.000807508	0.646243	chip2_peak_12197
chr2	32493000	32493200	200	202.835	4.12516	0.000898393	1	chip1_peak_6028
chr4	63422300	63422500	200	227.275	4.12536	0.000121481	0.404202	chip2_peak_2732
chr16	53062000	53062200	200	227.284	4.12552	0.000734087	0.638436	chip2_peak_11200
chr2	172742700	172743100	400	202.865	4.12577	0.000401926	1	chip1_peak_2542
chr8	26393600	26393800	200	227.317	4.12613	0.00078375	0.643976	chip2_peak_11852
chr6	126007800	126008000	200	202.894	4.12636	0.000548734	1	chip1_peak_3541
chr7	70175900	70176100	200	202.896	4.12639	0.00054135	1	chip1_peak_3484
chr17	87567800	87568000	200	227.348	4.12669	0.000964803	0.657711	chip2_peak_14416
chr17	62764500	62764700	200	227.352	4.12675	0.000732157	0.638436	chip2_peak_11171
chr15	78511000	78511200	200	227.352	4.12675	0.000732157	0.638436	chip2_peak_11172
chrX	47220200	47220600	400	227.358	4.12686	0.000249697	0.508444	chip2_peak_4559
chr14	79160200	79160400	200	227.388	4.12741	0.000803262	0.646243	chip2_peak_12134
chr16	50551400	50551600	200	227.401	4.12764	0.000515235	0.601701	chip2_peak_8189
chr10	128427000	128427200	200	202.964	4.12777	0.000729506	1	chip1_peak_4783
chr2	52285900	52286100	200	202.981	4.12813	0.0008865	1	chip1_peak_5935
chr2	133509200	133509400	200	227.436	4.12829	0.000368569	0.564481	chip2_peak_6181
chr6	35036100	35036300	200	227.447	4.12849	0.000252442	0.510693	chip2_peak_4593
chr18	31881300	31881500	200	227.455	4.12862	0.00077963	0.643976	chip2_peak_11797
chr5	60179800	60180000	200	227.455	4.12863	0.000991698	0.659157	chip2_peak_14803
chr13	102847500	102847700	200	203.028	4.12909	0.000610105	1	chip1_peak_3963
chr11	107683100	107683300	200	227.491	4.12929	0.000959718	0.657711	chip2_peak_14342
chr13	107882000	107882200	200	203.04	4.12932	0.000905454	1	chip1_peak_6092
chr12	106288700	106288900	200	203.04	4.12932	0.000909136	1	chip1_peak_6127
chr5	142122700	142123000	300	227.5	4.12945	0.00024849	0.507706	chip2_peak_4541
chr6	45273400	45273600	200	227.502	4.12948	0.000245108	0.505458	chip2_peak_4493
chr7	28636500	28636700	200	227.524	4.12988	0.000962441	0.657711	chip2_peak_14379
chr1	103857800	103858000	200	227.527	4.12994	0.000488892	0.596917	chip2_peak_7830
chr6	71486800	71487000	200	203.071	4.12995	0.000203711	1	chip1_peak_1292
chr11	69555800	69556000	200	203.076	4.13007	0.000793882	1	chip1_peak_5290
chr5	112440900	112441100	200	203.094	4.13043	0.000907195	1	chip1_peak_6109
chr9	113812300	113812500	200	227.565	4.13061	0.000455522	0.588741	chip2_peak_7375
chr1	191357900	191358100	200	227.605	4.13134	0.000152745	0.437748	chip2_peak_3185
chr4	56177400	56177600	200	227.609	4.13142	5.51503e-05	0.302147	chip2_peak_1608
chr9	35338900	35339200	300	203.16	4.13177	0.000539994	1	chip1_peak_3473
chr2	29960000	29960300	300	203.177	4.13211	0.000118532	1	chip1_peak_786
chr3	153582500	153582700	200	227.651	4.13219	0.000918605	0.65458	chip2_peak_13743
chr12	104913100	104913300	200	203.193	4.13243	0.000126044	1	chip1_peak_827
chr4	141903500	141903700	200	227.667	4.13248	0.000957369	0.65748	chip2_peak_14313
chr12	71828300	71828500	200	203.204	4.13266	0.000616732	1	chip1_peak_4004
chr11	79265500	79265800	300	203.205	4.13269	0.000105961	1	chip1_peak_728
chr13	40640400	40640700	300	227.697	4.13302	0.000294549	0.532796	chip2_peak_5174
chr4	133857900	133858100	200	227.719	4.13343	1.7639e-05	0.181871	chip2_peak_818
chr1	59083100	59083300	200	203.246	4.13352	0.000529158	1	chip1_peak_3393
chr7	119933300	119933700	400	227.737	4.13374	0.000459833	0.589885	chip2_peak_7431
chr14	101040400	101040600	200	227.738	4.13377	0.000902561	0.653838	chip2_peak_13553
chr7	43440500	43440800	300	203.26	4.1338	4.78734e-05	1	chip1_peak_370
chr3	121741500	121741700	200	227.741	4.13382	0.000842865	0.649182	chip2_peak_12706
chr5	28064700	28064900	200	203.271	4.13402	0.000607615	1	chip1_peak_3953
chr3	116686400	116686600	200	203.271	4.13402	0.000955587	1	chip1_peak_6489
chr7	71330600	71330800	200	203.285	4.13431	0.000569932	1	chip1_peak_3671
chr17	26388100	26388400	300	227.773	4.13439	0.000877718	0.651913	chip2_peak_13189
chr8	17331600	17331900	300	227.776	4.13445	8.43356e-05	0.352626	chip2_peak_2136
chr10	79059500	79059700	200	227.79	4.13471	0.00055699	0.610648	chip2_peak_8787
chr5	14914900	14915200	300	227.803	4.13495	0.000346786	0.556528	chip2_peak_5886
chr5	139094000	139094200	200	203.321	4.13504	0.000827249	1	chip1_peak_5518
chr12	108893000	108893300	300	203.327	4.13516	3.81727e-05	1	chip1_peak_304
chr2	59859500	59859700	200	227.842	4.13565	0.000465608	0.591537	chip2_peak_7508
chr9	117899400	117899600	200	203.358	4.1358	0.000839829	1	chip1_peak_5603
chr11	29870100	29870300	200	203.364	4.13593	0.000533475	1	chip1_peak_3423
chr16	30900500	30900700	200	203.415	4.13695	0.0006849	1	chip1_peak_4481
chr11	69688800	69689000	200	203.421	4.13708	0.000689371	1	chip1_peak_4512
chr3	3513600	3513800	200	227.95	4.13762	0.000895442	0.65264	chip2_peak_13472
chr13	96578800	96579000	200	203.454	4.13775	0.000178033	1	chip1_peak_1123
chr4	125658500	125658700	200	227.99	4.13833	0.000593094	0.617171	chip2_peak_9285
chr4	131859400	131859700	300	203.487	4.13842	0.000344208	1	chip1_peak_2173
chr17	34806500	34806700	200	227.999	4.1385	0.00028874	0.530927	chip2_peak_5085
chr14	16412000	16412200	200	228.002	4.13855	0.000307734	0.538329	chip2_peak_5363
chr6	37259000	37259200	200	228.002	4.13855	0.000307734	0.538329	chip2_peak_5364
chr13	23771900	23772100	200	203.514	4.13896	0.000605136	1	chip1_peak_3936
chr5	28864400	28864600	200	228.045	4.13933	0.000536438	0.605729	chip2_peak_8493
chr11	84347900	84348100	200	203.541	4.13952	0.000256823	1	chip1_peak_1630
chr12	102656200	102656600	400	203.565	4.14	4.27038e-05	1	chip1_peak_333
chr6	146997100	146997400	300	228.084	4.14004	0.000233454	0.498924	chip2_peak_4339
chr9	110640500	110640700	200	203.573	4.14016	0.000859956	1	chip1_peak_5742
chr9	40873900	40874100	200	228.098	4.1403	0.000785927	0.643976	chip2_peak_11904
chr18	80603000	80603200	200	228.107	4.14046	0.000372027	0.566295	chip2_peak_6219
chr13	88184800	88185000	200	203.596	4.14064	0.000736408	1	chip1_peak_4847
chr6	60720100	60720300	200	228.121	4.14072	0.000589989	0.61714	chip2_peak_9233
chr1	131999100	131999300	200	203.602	4.14076	0.000531302	1	chip1_peak_3411
chr16	26693000	26693200	200	203.678	4.14229	0.000123467	1	chip1_peak_813
chr15	43253500	43253800	300	228.209	4.14231	0.000128352	0.412336	chip2_peak_2828
chr18	20871300	20871600	300	228.223	4.14256	0.000126469	0.410169	chip2_peak_2799
chr4	63388800	63389100	300	203.696	4.14267	0.000620418	1	chip1_peak_4034
chr1	81384800	81385000	200	228.243	4.14294	0.000704413	0.633199	chip2_peak_10828
chr9	48275000	48275200	200	228.27	4.14341	8.17557e-05	0.348548	chip2_peak_2088
chr15	100797800	100798000	200	203.741	4.14359	0.000252514	1	chip1_peak_1609
chr2	164884500	164884700	200	228.296	4.14389	0.000283069	0.52899	chip2_peak_4999
chr1	82636600	82636800	200	203.77	4.14418	8.23573e-05	1	chip1_peak_572
chr2	91699800	91700200	400	203.778	4.14433	3.62015e-05	1	chip1_peak_295
chr11	54108100	54108400	300	203.787	4.14451	0.000256769	1	chip1_peak_1629
chr11	117459500	117459700	200	203.808	4.14495	0.000487671	1	chip1_peak_3104
chr16	18194000	18194200	200	203.808	4.14495	0.000896244	1	chip1_peak_6014
chr4	139080500	139080700	200	203.82	4.14519	0.000223396	1	chip1_peak_1426
chr5	16136700	16137000	300	228.395	4.14569	0.000294576	0.532796	chip2_peak_5176
chr10	105260800	105261100	300	228.397	4.14572	4.98463e-05	0.290485	chip2_peak_1508
chr1	91051200	91051500	300	203.85	4.1458	0.000287398	1	chip1_peak_1810
chr1	91821300	91821500	200	203.892	4.14666	0.000595007	1	chip1_peak_3861
chr9	63101900	63102100	200	203.892	4.14666	0.000595007	1	chip1_peak_3862
chr1	20985100	20985300	200	228.483	4.14729	0.000212525	0.486247	chip2_peak_4040
chr11	35724200	35724400	200	228.527	4.14808	0.000748238	0.63967	chip2_peak_11420
chr1	135970200	135970400	200	228.534	4.14822	0.000768878	0.643615	chip2_peak_11648
chr8	41406100	41406300	200	228.542	4.14836	0.000593642	0.617261	chip2_peak_9295
chr10	79963100	79963300	200	228.565	4.14877	0.000212566	0.486247	chip2_peak_4041
chr11	82783200	82783400	200	204.022	4.14929	0.000290975	1	chip1_peak_1830
chr17	73230500	73230700	200	228.595	4.14933	0.000746271	0.639361	chip2_peak_11390
chr14	22729700	22729900	200	228.595	4.14933	0.000862643	0.651913	chip2_peak_12950
chr6	92077400	92077800	400	228.596	4.14933	0.000297728	0.533621	chip2_peak_5235
chr12	25129900	25130100	200	204.058	4.15004	0.000248467	1	chip1_peak_1582
chr16	33211500	33211700	200	204.064	4.15016	0.000250071	1	chip1_peak_1593
chr12	73097500	73097700	200	228.662	4.15053	0.000677115	0.630166	chip2_peak_10444
chr7	67981700	67981900	200	228.664	4.15057	0.00074431	0.639086	chip2_peak_11358
chr7	96944100	96944300	200	228.664	4.15057	0.00074431	0.639086	chip2_peak_11359
chr1	184957600	184957800	200	228.664	4.15057	0.00074431	0.639086	chip2_peak_11360
chr11	76289800	76290000	200	204.115	4.15119	0.00058115	1	chip1_peak_3746
chr3	144679000	144679200	200	228.7	4.15123	0.000549792	0.608948	chip2_peak_8683
chr5	7971000	7971200	200	204.119	4.15127	0.000721927	1	chip1_peak_4736
chr9	21305500	21305700	200	228.733	4.15182	0.000742353	0.638827	chip2_peak_11332
chr10	20036700	20037000	300	228.744	4.15202	0.00017005	0.451572	chip2_peak_3459
chr11	29727400	29727600	200	228.749	4.15212	0.000916124	0.65458	chip2_peak_13706
chr9	71682100	71682300	200	228.783	4.15273	0.000918722	0.65458	chip2_peak_13747
chr13	89661900	89662100	200	228.798	4.153	0.00020143	0.479254	chip2_peak_3888
chr12	12232900	12233100	200	228.802	4.15307	0.000740402	0.638827	chip2_peak_11300
chr6	34325200	34325500	300	204.209	4.15311	0.000655307	1	chip1_peak_4270
chr1	34297100	34297300	200	204.224	4.1534	0.000787494	1	chip1_peak_5235
chr17	35518400	35518600	200	204.231	4.15356	0.000745674	1	chip1_peak_4909
chr1	133706600	133706800	200	204.231	4.15356	0.000745674	1	chip1_peak_4910
chr10	121075100	121075300	200	204.237	4.15367	0.000437472	1	chip1_peak_2776
chr2	108752800	108753000	200	228.855	4.15404	0.000345332	0.556491	chip2_peak_5856
chr9	42040100	42040300	200	204.272	4.15438	0.000795143	1	chip1_peak_5296
chr17	81185100	81185300	200	228.926	4.15533	0.000913886	0.65458	chip2_peak_13669
chr16	17260600	17260800	200	204.338	4.15572	0.000216014	1	chip1_peak_1376
chr11	103961100	103961300	200	204.364	4.15626	0.000973081	1	chip1_peak_6626
chr17	47181900	47182100	200	204.366	4.1563	0.000582554	1	chip1_peak_3750
chr16	90164600	90164800	200	204.366	4.1563	0.000582554	1	chip1_peak_3751
chr12	41238900	41239100	200	204.392	4.15682	0.0001887	1	chip1_peak_1184
chr4	130750500	130750700	200	204.392	4.15683	0.000672343	1	chip1_peak_4393
chr2	4156700	4156900	200	204.404	4.15707	0.000191138	1	chip1_peak_1196
chr12	70587500	70587700	200	204.405	4.15709	0.000840781	1	chip1_peak_5612
chr3	36531700	36531900	200	229.052	4.15761	0.000953232	0.657377	chip2_peak_14249
chr8	85675200	85675400	200	229.091	4.15832	0.000804836	0.646243	chip2_peak_12162
chr4	80946300	80946600	300	204.476	4.15854	0.000793882	1	chip1_peak_5291
chr18	27610300	27610500	200	229.125	4.15894	0.00085707	0.651578	chip2_peak_12895
chr3	43275200	43275400	200	229.127	4.15898	0.000970759	0.657711	chip2_peak_14497
chr12	100788100	100788400	300	204.513	4.15929	0.000945882	1	chip1_peak_6423
chr14	21776800	21777000	200	229.15	4.15939	0.000390293	0.569938	chip2_peak_6478
chr6	134373400	134373700	300	229.151	4.15942	0.000866485	0.651913	chip2_peak_13012
chr7	100023200	100023400	200	204.541	4.15985	0.000651985	1	chip1_peak_4252
chr7	90924300	90924500	200	229.198	4.16026	0.000599576	0.618135	chip2_peak_9380
chr7	79194500	79194700	200	229.211	4.1605	0.000655585	0.628007	chip2_peak_10137
chr9	15723000	15723200	200	229.213	4.16053	0.000361063	0.561464	chip2_peak_6085
chr9	43141100	43141600	500	204.595	4.16094	0.000226663	1	chip1_peak_1453
chr11	117889900	117890100	200	204.601	4.16107	0.000680799	1	chip1_peak_4456
chr16	31763600	31763800	200	204.641	4.1619	6.95261e-05	1	chip1_peak_500
chr3	138569800	138570000	200	229.321	4.1625	0.000858646	0.651912	chip2_peak_12910
chr1	143959000	143959200	200	229.337	4.16279	0.00085032	0.649876	chip2_peak_12819
chr15	34135800	34136000	200	229.345	4.16293	0.0009631	0.657711	chip2_peak_14392
chr12	45256300	45256500	200	204.703	4.16314	0.000993566	1	chip1_peak_6778
chr13	49173600	49173800	200	229.37	4.16338	0.000921248	0.65458	chip2_peak_13789
chr10	116550500	116550800	300	229.372	4.16342	4.6919e-06	0.0855004	chip2_peak_441
chr5	92665800	92666000	200	229.378	4.16353	0.000119917	0.402501	chip2_peak_2708
chr1	36892100	36892400	300	229.403	4.16398	0.000420317	0.580502	chip2_peak_6871
chr13	69673300	69673500	200	204.783	4.16477	0.000493279	1	chip1_peak_3141
chr7	99508900	99509100	200	204.783	4.16477	0.00064512	1	chip1_peak_4202
chr13	12176100	12176400	300	229.473	4.16526	0.000578042	0.614078	chip2_peak_9088
chr10	69617100	69617300	200	204.809	4.16531	9.01598e-05	1	chip1_peak_629
chr5	60129300	60129500	200	229.505	4.16584	0.000560519	0.610954	chip2_peak_8837
chr2	60204300	60204600	300	229.508	4.16588	0.000152465	0.437748	chip2_peak_3175
chr4	45858700	45858900	200	204.84	4.16594	0.000990452	1	chip1_peak_6751
chr2	13387400	13387600	200	229.52	4.16612	0.000367376	0.563998	chip2_peak_6168
chr6	90650800	90651000	200	204.874	4.16662	0.000725435	1	chip1_peak_4759
chr16	31205000	31205200	200	204.905	4.16725	0.00018365	1	chip1_peak_1159
chr14	57807200	57807500	300	229.626	4.16804	0.000440673	0.585964	chip2_peak_7147
chr6	34900400	34900700	300	229.635	4.16819	0.000217577	0.490794	chip2_peak_4098
chr4	47301200	47301400	200	204.994	4.16906	0.000559012	1	chip1_peak_3602
chr10	82244400	82244700	300	229.741	4.17013	0.000610456	0.621526	chip2_peak_9510
chr13	68553500	68553700	200	229.769	4.17063	0.000209808	0.485665	chip2_peak_3997
chr14	21666000	21666200	200	229.776	4.17076	0.00093872	0.655357	chip2_peak_14061
chr1	184070700	184070900	200	229.78	4.17083	9.3908e-05	0.367129	chip2_peak_2309
chr15	53566400	53566600	200	229.785	4.17092	0.000340204	0.55516	chip2_peak_5781
chr15	32613700	32613900	200	229.793	4.17107	0.000151126	0.437269	chip2_peak_3153
chr5	143498600	143498800	200	229.819	4.17154	0.000732142	0.638436	chip2_peak_11170
chr18	35136400	35136600	200	205.126	4.17176	0.000601943	1	chip1_peak_3911
chr19	42681100	42681300	200	229.838	4.17189	0.000466173	0.591673	chip2_peak_7517
chr13	54099200	54099400	200	229.841	4.17194	0.000557167	0.610648	chip2_peak_8792
chr7	84193900	84194100	200	229.888	4.17279	0.000730219	0.638436	chip2_peak_11136
chr6	127611000	127611300	300	229.897	4.17295	0.000158108	0.441979	chip2_peak_3270
chr5	13619500	13619700	200	229.9	4.17301	0.000425671	0.581881	chip2_peak_6938
chr3	29354400	29354600	200	229.9	4.17301	0.000425671	0.581881	chip2_peak_6939
chr1	176137400	176137600	200	229.936	4.17365	0.000876869	0.651913	chip2_peak_13175
chr4	131691800	131692000	200	229.937	4.17368	0.000389292	0.569818	chip2_peak_6461
chr4	44397200	44397400	200	205.23	4.17387	0.000553138	1	chip1_peak_3571
chr7	108404200	108404400	200	229.955	4.17401	0.000974173	0.65784	chip2_peak_14562
chr19	56406200	56406400	200	205.264	4.17457	0.000205876	1	chip1_peak_1308
chr5	37194400	37194600	200	230.011	4.17502	0.000706903	0.633695	chip2_peak_10856
chr3	60607300	60607500	200	230.013	4.17506	0.000660427	0.628307	chip2_peak_10205
chr2	48426000	48426200	200	230.026	4.17529	0.000423452	0.58156	chip2_peak_6908
chr4	120231900	120232100	200	230.046	4.17566	0.000261756	0.516943	chip2_peak_4718
chr5	118280200	118280400	200	205.322	4.17573	0.000967783	1	chip1_peak_6576
chr2	155268900	155269100	200	230.079	4.17625	0.000872259	0.651913	chip2_peak_13098
chr1	118910800	118911000	200	230.08	4.17627	0.000705047	0.633285	chip2_peak_10835
chr12	5418300	5418500	200	230.087	4.1764	0.00028843	0.530927	chip2_peak_5072
chr13	110827800	110828300	500	230.116	4.17693	1.98737e-05	0.191543	chip2_peak_877
chr8	45769400	45769600	200	205.394	4.1772	0.000494561	1	chip1_peak_3154
chr4	96443300	96443500	200	230.15	4.17755	0.000869964	0.651913	chip2_peak_13057
chr7	117903200	117903400	200	230.182	4.17813	0.00042243	0.580855	chip2_peak_6900
chr3	151843000	151843200	200	205.485	4.17904	0.000699342	1	chip1_peak_4560
chr2	18096900	18097100	200	230.256	4.17948	0.000870135	0.651913	chip2_peak_13063
chr2	20298800	20299000	200	230.256	4.17948	0.000870135	0.651913	chip2_peak_13064
chr9	103970400	103970700	300	205.509	4.17954	0.000121663	1	chip1_peak_797
chr3	155716700	155716900	200	230.275	4.17981	0.000957367	0.65748	chip2_peak_14312
chr11	98891800	98892000	200	230.328	4.18078	0.000867845	0.651913	chip2_peak_13027
chr13	5345700	5345900	200	230.348	4.18113	0.000954844	0.657417	chip2_peak_14271
chr9	77959200	77959400	200	230.348	4.18113	0.000954844	0.657417	chip2_peak_14272
chr8	29104200	29104400	200	230.402	4.18213	0.000926692	0.65458	chip2_peak_13882
chr9	44270100	44270300	200	230.403	4.18215	0.000736969	0.638436	chip2_peak_11254
chr6	58930800	58931000	200	230.411	4.18229	9.09058e-05	0.364661	chip2_peak_2242
chr6	100948600	100948800	200	205.663	4.18266	0.000625093	1	chip1_peak_4075
chr6	56705900	56706100	200	230.449	4.18297	0.000552735	0.609623	chip2_peak_8726
chr6	81953800	81954000	200	230.449	4.18297	0.000552735	0.609623	chip2_peak_8727
chr3	110142200	110142500	300	230.451	4.183	5.38882e-05	0.299705	chip2_peak_1584
chr2	102940500	102940700	200	230.463	4.18323	0.000646353	0.626533	chip2_peak_10007
chr3	135797600	135797800	200	205.696	4.18335	0.00054525	1	chip1_peak_3518
chr18	64100900	64101100	200	230.475	4.18344	0.000924252	0.65458	chip2_peak_13839
chr6	135562700	135562900	200	205.705	4.18353	0.000548799	1	chip1_peak_3543
chr3	108681900	108682100	200	230.486	4.18365	0.000376083	0.566684	chip2_peak_6285
chr11	118125500	118125700	200	230.545	4.18471	0.000135723	0.42223	chip2_peak_2920
chr4	136076600	136076800	200	230.547	4.18476	0.000921818	0.65458	chip2_peak_13798
chr17	88012000	88012200	200	230.62	4.18607	0.000919391	0.65458	chip2_peak_13760
chr2	98294200	98294400	200	230.62	4.18607	0.000919391	0.65458	chip2_peak_13761
chr11	55252400	55252600	200	230.695	4.18744	0.00053235	0.605593	chip2_peak_8421
chr9	73328800	73329100	300	230.712	4.18775	0.000125411	0.4096	chip2_peak_2777
chr9	103597100	103597300	200	230.728	4.18804	0.000919572	0.65458	chip2_peak_13763
chr7	114027600	114027800	200	230.743	4.18831	0.000240179	0.502729	chip2_peak_4430
chr3	118849400	118849700	300	230.756	4.18855	0.00012507	0.409308	chip2_peak_2770
chr4	149053800	149054100	300	230.764	4.18868	8.50142e-05	0.354491	chip2_peak_2143
chr13	41410200	41410500	300	205.97	4.18891	0.000155738	1	chip1_peak_983
chr17	84675700	84675900	200	205.975	4.18902	0.000407286	1	chip1_peak_2580
chr17	86282800	86283000	200	230.802	4.18939	0.00044628	0.587543	chip2_peak_7226
chr9	100817300	100817500	200	230.834	4.18997	0.000923139	0.65458	chip2_peak_13830
chr1	158147700	158147900	200	230.835	4.18997	0.000637132	0.625463	chip2_peak_9875
chr15	96907200	96907400	200	230.839	4.19005	0.000979685	0.658047	chip2_peak_14637
chr1	131042600	131042800	200	230.84	4.19007	0.000360386	0.561037	chip2_peak_6078
chr3	37465500	37465700	200	230.866	4.19055	0.000445115	0.587523	chip2_peak_7207
chr8	77252700	77253000	300	206.061	4.19076	0.000758361	1	chip1_peak_5008
chr16	59923300	59923600	300	230.881	4.19081	0.000351566	0.557938	chip2_peak_5961
chr17	85319100	85319400	300	230.934	4.19177	0.000642625	0.626238	chip2_peak_9955
chr1	181463500	181463700	200	230.936	4.19182	0.000781745	0.643976	chip2_peak_11823
chr7	135061300	135061500	200	230.936	4.19182	0.000982426	0.658053	chip2_peak_14677
chr17	55137200	55137400	200	230.966	4.19235	0.000700876	0.632933	chip2_peak_10776
chr14	13966400	13966600	200	230.975	4.19252	0.000535615	0.605729	chip2_peak_8477
chr3	75534200	75534400	200	206.194	4.19348	0.000194856	1	chip1_peak_1225
chr2	166378800	166379100	300	231.035	4.1936	0.000697455	0.632319	chip2_peak_10732
chr4	125017600	125017800	200	231.035	4.19362	0.00047514	0.592903	chip2_peak_7652
chr2	77114700	77114900	200	231.07	4.19424	0.000875557	0.651913	chip2_peak_13159
chr12	83941100	83941300	200	231.07	4.19424	0.000454892	0.588612	chip2_peak_7366
chr18	35756000	35756200	200	206.251	4.19464	0.000674474	1	chip1_peak_4406
chr19	59902000	59902200	200	231.1	4.19479	0.000473899	0.592894	chip2_peak_7630
chr1	135797000	135797200	200	231.104	4.19486	0.000697204	0.632319	chip2_peak_10726
chr9	84792300	84792500	200	231.133	4.19538	0.000404425	0.573783	chip2_peak_6677
chr16	83131600	83131800	200	231.152	4.19573	0.000676731	0.63011	chip2_peak_10437
chr18	57760700	57760900	200	231.152	4.19573	0.000676731	0.63011	chip2_peak_10438
chr7	139767300	139767500	200	231.152	4.19573	0.00086142	0.651913	chip2_peak_12940
chr10	111119300	111119500	200	231.187	4.19637	0.000347281	0.556528	chip2_peak_5894
chr1	157635300	157635500	200	231.196	4.19652	0.000192575	0.472291	chip2_peak_3763
chr2	29785700	29786100	400	231.224	4.19705	0.000231319	0.498091	chip2_peak_4310
chr12	44310800	44311000	200	231.242	4.19736	0.000693552	0.632282	chip2_peak_10669
chr18	77798000	77798200	200	231.242	4.19736	0.000693552	0.632282	chip2_peak_10670
chr8	24415200	24415400	200	231.242	4.19736	0.000693552	0.632282	chip2_peak_10671
chr11	111890200	111890400	200	206.415	4.19797	0.000421644	1	chip1_peak_2688
chr6	47468700	47468900	200	206.423	4.19814	0.000171841	1	chip1_peak_1084
chr16	82957600	82957800	200	231.289	4.19822	0.000673187	0.629228	chip2_peak_10399
chr14	62231600	62231800	200	231.321	4.1988	0.000401271	0.573141	chip2_peak_6631
chr4	108800500	108800700	200	231.358	4.19947	0.000671423	0.62898	chip2_peak_10377
chr9	121015700	121015900	200	231.358	4.19947	0.000671423	0.62898	chip2_peak_10378
chr2	51009700	51009900	200	231.404	4.2003	0.000264743	0.51929	chip2_peak_4754
chr5	114368600	114368800	200	206.532	4.20035	0.000166314	1	chip1_peak_1048
chr1	7133000	7133200	200	231.408	4.20038	0.00083055	0.648173	chip2_peak_12546
chr5	121325900	121326100	200	206.543	4.20058	0.000593522	1	chip1_peak_3854
chr4	105150800	105151000	200	206.584	4.20141	0.000397962	1	chip1_peak_2508
chr3	65431300	65431500	200	231.479	4.20166	0.000510738	0.600566	chip2_peak_8132
chr6	56039100	56039300	200	231.479	4.20167	0.000828367	0.648074	chip2_peak_12514
chr7	72464900	72465100	200	231.495	4.20197	0.000886607	0.651913	chip2_peak_13347
chr17	57200600	57200900	300	206.62	4.20214	0.000425868	1	chip1_peak_2714
chr4	24492600	24492800	200	231.515	4.20233	0.000830715	0.648173	chip2_peak_12550
chr5	139969900	139970100	200	231.536	4.2027	0.000400293	0.572901	chip2_peak_6615
chr2	121409700	121409900	200	206.649	4.20273	0.000364483	1	chip1_peak_2305
chr18	54867300	54867500	200	231.551	4.20297	0.00082619	0.648074	chip2_peak_12477
chr7	46406400	46406800	400	231.578	4.20346	0.000155712	0.440023	chip2_peak_3233
chr18	68042500	68042700	200	231.583	4.20356	5.63597e-05	0.305094	chip2_peak_1628
chr13	119415600	119415800	200	206.694	4.20365	0.000518156	1	chip1_peak_3316
chr13	119329800	119330000	200	231.604	4.20394	0.000945142	0.656626	chip2_peak_14138
chr1	37067800	37068000	200	206.794	4.20568	0.000522824	1	chip1_peak_3350
chr5	80954900	80955200	300	231.719	4.20602	0.000756688	0.641155	chip2_peak_11523
chr5	67678000	67678200	200	231.722	4.20608	0.000324292	0.548562	chip2_peak_5562
chr14	30684700	30684900	200	206.816	4.20611	0.000263766	1	chip1_peak_1678
chrX	106635000	106635200	200	231.725	4.20614	0.000615566	0.622234	chip2_peak_9578
chr7	125739900	125740100	200	206.82	4.2062	8.02279e-05	1	chip1_peak_557
chr19	42356300	42356500	200	206.822	4.20624	0.000921705	1	chip1_peak_6219
chr5	111972400	111972600	200	206.822	4.20624	0.000860092	1	chip1_peak_5745
chr17	36893100	36893300	200	231.742	4.20645	0.000525078	0.604058	chip2_peak_8314
chr17	72256200	72256500	300	231.744	4.20648	0.000168079	0.450142	chip2_peak_3420
chr10	67702600	67702800	200	231.77	4.20696	0.000494792	0.598413	chip2_peak_7905
chr14	35993300	35993500	200	231.774	4.20701	0.000993229	0.659169	chip2_peak_14822
chr14	75469900	75470100	200	231.775	4.20705	0.000906747	0.65458	chip2_peak_13581
chr3	146350000	146350200	200	231.785	4.20723	0.000968608	0.657711	chip2_peak_14472
chr4	107238300	107238600	300	206.875	4.20732	0.000667145	1	chip1_peak_4347
chr1	20937200	20937400	200	231.801	4.20752	0.000822018	0.647586	chip2_peak_12425
chr5	31703800	31704000	200	231.808	4.20765	0.000523706	0.603429	chip2_peak_8301
chr6	5108900	5109100	200	231.827	4.20799	0.000615688	0.622234	chip2_peak_9580
chr7	130726400	130726600	200	206.917	4.20818	0.000448854	1	chip1_peak_2845
chr6	72395300	72395500	200	206.919	4.20821	0.000447488	1	chip1_peak_2833
chr19	10791100	10791300	200	231.851	4.20842	0.000508379	0.600207	chip2_peak_8096
chr10	84901600	84901800	200	231.86	4.20858	0.000991167	0.659038	chip2_peak_14797
chr9	28780900	28781100	200	231.865	4.20868	0.000539607	0.60642	chip2_peak_8550
chr4	49086300	49086500	200	231.884	4.20903	0.000671162	0.62898	chip2_peak_10371
chr16	85988500	85988700	200	231.895	4.20922	0.000877718	0.651913	chip2_peak_13190
chr11	61256400	61256600	200	231.895	4.20922	0.000391827	0.570156	chip2_peak_6503
chr9	45947300	45947500	200	206.991	4.20967	0.000454249	1	chip1_peak_2887
chr12	86306200	86306400	200	206.991	4.20969	0.000376642	1	chip1_peak_2385
chr6	120989200	120989400	200	231.924	4.20974	9.24464e-05	0.365957	chip2_peak_2276
chr3	126356300	126356500	200	206.998	4.20983	0.000767463	1	chip1_peak_5077
chr4	109672100	109672300	200	207.019	4.21026	0.00067081	1	chip1_peak_4378
chr4	116563500	116563800	300	231.96	4.21041	6.30751e-05	0.323262	chip2_peak_1718
chr2	117450400	117450600	200	231.965	4.21049	0.00059736	0.617901	chip2_peak_9347
chr16	24444200	24444400	200	207.032	4.21052	0.000588872	1	chip1_peak_3817
chr12	17101300	17101500	200	231.967	4.21053	0.00087541	0.651913	chip2_peak_13153
chr6	6415400	6415600	200	231.967	4.21053	0.00087541	0.651913	chip2_peak_13154
chr4	131518600	131518800	200	231.967	4.21053	0.00087541	0.651913	chip2_peak_13155
chr8	16243100	16243300	200	231.967	4.21053	0.00087541	0.651913	chip2_peak_13156
chr8	48137900	48138200	300	231.968	4.21054	0.000838155	0.648817	chip2_peak_12654
chr6	46990600	46990800	200	231.97	4.21057	0.000839946	0.648968	chip2_peak_12679
chr8	57755300	57755500	200	232.004	4.2112	0.000877894	0.651913	chip2_peak_13193
chr5	106615300	106615500	200	232.012	4.21135	0.000272491	0.524018	chip2_peak_4858
chr13	30138500	30138700	200	232.04	4.21185	0.000873109	0.651913	chip2_peak_13110
chr1	93243000	93243300	300	232.053	4.21209	3.94319e-05	0.262373	chip2_peak_1305
chr4	142823000	142823200	200	232.112	4.21316	0.000870813	0.651913	chip2_peak_13078
chr8	22042200	22042400	200	207.164	4.2132	0.000880009	1	chip1_peak_5886
chr15	6601000	6601200	200	207.224	4.21443	0.000543229	1	chip1_peak_3501
chr1	191282000	191282200	200	232.212	4.21497	0.000838324	0.648839	chip2_peak_12657
chr15	82124800	82125100	300	207.281	4.21558	0.000396452	1	chip1_peak_2497
chr14	59730000	59730200	200	232.25	4.21567	0.000862718	0.651913	chip2_peak_12952
chr15	53289200	53289400	200	207.317	4.21631	0.000929679	1	chip1_peak_6290
chr12	29176600	29176900	300	207.317	4.21632	0.000189509	1	chip1_peak_1189
chr11	6273000	6273200	200	232.293	4.21645	0.000213347	0.486873	chip2_peak_4053
chr1	65044200	65044500	300	207.324	4.21646	9.85726e-05	1	chip1_peak_681
chr8	11291300	11291500	200	232.3	4.21657	0.000682038	0.630901	chip2_peak_10508
chr6	127613600	127613800	200	207.333	4.21663	0.000239205	1	chip1_peak_1530
chr3	105965900	105966100	200	232.365	4.21775	0.000450235	0.587543	chip2_peak_7293
chr5	80884700	80884900	200	232.388	4.21818	0.000663976	0.628601	chip2_peak_10258
chr16	38489200	38489400	200	207.409	4.21818	0.000650895	1	chip1_peak_4243
chr16	7060800	7061000	200	232.391	4.21822	0.00046258	0.59009	chip2_peak_7478
chr15	80487100	80487300	200	207.413	4.21826	0.000571416	1	chip1_peak_3679
chr8	124670500	124670700	200	207.413	4.21826	0.000571416	1	chip1_peak_3680
chr11	104405000	104405200	200	207.439	4.2188	0.000158535	1	chip1_peak_1002
chr15	74368800	74369000	200	232.43	4.21893	0.00081374	0.646571	chip2_peak_12311
chr4	150342000	150342200	200	232.43	4.21893	0.000815724	0.646726	chip2_peak_12336
chr3	100446700	100446900	200	207.462	4.21926	0.000111933	1	chip1_peak_758
chr7	81287500	81287700	200	232.455	4.21939	0.000461373	0.590049	chip2_peak_7454
chr16	48302700	48302900	200	232.457	4.21943	0.000662236	0.628307	chip2_peak_10229
chr6	127876000	127876200	200	232.499	4.22018	0.000642803	0.626273	chip2_peak_9958
chr5	67843900	67844100	200	232.506	4.2203	0.000225029	0.492927	chip2_peak_4229
chr17	66549200	66549400	200	232.527	4.22068	0.000660502	0.628307	chip2_peak_10206
chr5	24914400	24914600	200	207.534	4.22073	0.000311327	1	chip1_peak_1946
chr3	95169900	95170100	200	207.553	4.22111	0.000475929	1	chip1_peak_3039
chr3	103608300	103608500	200	232.558	4.22125	0.000375368	0.566396	chip2_peak_6275
chr7	129801100	129801400	300	232.572	4.22151	0.000493221	0.598162	chip2_peak_7884
chr15	66185700	66186000	300	232.621	4.2224	0.000613029	0.621962	chip2_peak_9539
chr13	18744400	18744600	200	232.623	4.22244	0.000445557	0.587543	chip2_peak_7214
chr18	51270700	51270900	200	207.637	4.22282	0.000496615	1	chip1_peak_3168
chr9	70215300	70215500	200	207.637	4.22282	0.000528992	1	chip1_peak_3392
chr13	12574100	12574300	200	207.655	4.22318	0.000853977	1	chip1_peak_5700
chr10	24301600	24301800	200	232.685	4.22356	0.000232682	0.498621	chip2_peak_4328
chr9	91914200	91914400	200	232.705	4.22392	0.000637768	0.62564	chip2_peak_9883
chr6	115805400	115805600	200	232.712	4.22405	0.000611092	0.621802	chip2_peak_9514
chr14	64695200	64695500	300	232.769	4.22509	0.000865561	0.651913	chip2_peak_12997
chr15	26748600	26748800	200	232.774	4.22517	0.000636098	0.625405	chip2_peak_9861
chr15	54871200	54871400	200	232.784	4.22535	0.000704648	0.633235	chip2_peak_10831
chr6	84393600	84393800	200	232.844	4.22645	0.000488664	0.596736	chip2_peak_7826
chr1	70917800	70918100	300	232.873	4.22696	8.68098e-06	0.124164	chip2_peak_586
chr9	116540000	116540200	200	232.876	4.22703	0.000812885	0.646411	chip2_peak_12300
chr2	76884000	76884200	200	232.885	4.22718	0.000330522	0.551824	chip2_peak_5644
chr4	155901000	155901200	200	232.904	4.22753	0.000501452	0.599984	chip2_peak_7981
chr15	83256200	83256400	200	207.87	4.22756	0.000206093	1	chip1_peak_1310
chr7	123046500	123046700	200	232.912	4.22767	0.000870247	0.651913	chip2_peak_13066
chr6	142422300	142422500	200	232.921	4.22785	2.36031e-05	0.207433	chip2_peak_971
chr1	191074900	191075100	200	207.885	4.22786	0.000494608	1	chip1_peak_3155
chr16	72904500	72904700	200	207.892	4.228	0.00056448	1	chip1_peak_3638
chr2	28690700	28690900	200	232.961	4.22857	0.000482714	0.594394	chip2_peak_7761
chr10	44428700	44428900	200	232.984	4.22899	0.00086796	0.651913	chip2_peak_13031
chr9	27326800	27327300	500	233.002	4.22931	0.000146974	0.433253	chip2_peak_3096
chr14	10761600	10761800	200	233.035	4.22991	0.000337792	0.553803	chip2_peak_5752
chr10	112742700	112742900	200	233.057	4.23032	0.00086568	0.651913	chip2_peak_13002
chr2	44715700	44715900	200	233.057	4.23032	0.00086568	0.651913	chip2_peak_13003
chr2	145306700	145307000	300	233.075	4.23063	0.000237491	0.50133	chip2_peak_4388
chr8	46049400	46049700	300	233.082	4.23077	0.00014551	0.430922	chip2_peak_3081
chr5	31131000	31131200	200	233.097	4.23103	0.000336914	0.553604	chip2_peak_5735
chr15	58887500	58887700	200	208.047	4.23116	0.000218269	1	chip1_peak_1388
chr5	112051100	112051300	200	208.048	4.23118	0.000532924	1	chip1_peak_3420
chr3	102112400	102112700	300	233.106	4.2312	0.000342173	0.556009	chip2_peak_5800
chr13	100711800	100712000	200	233.17	4.23236	0.000837985	0.648817	chip2_peak_12651
chr2	28076400	28076600	200	233.204	4.23298	0.000612778	0.621921	chip2_peak_9535
chr12	107110700	107110900	200	208.159	4.23344	0.000639012	1	chip1_peak_4166
chr3	83107800	83108000	200	233.243	4.23368	0.000835785	0.648364	chip2_peak_12625
chr13	76003300	76003600	300	233.282	4.23439	0.000396172	0.571518	chip2_peak_6558
chr8	68091500	68091700	200	233.294	4.23461	0.000581812	0.614629	chip2_peak_9138
chr18	64551200	64551400	200	208.224	4.23476	0.000421672	1	chip1_peak_2689
chr3	30748200	30748400	200	208.236	4.235	0.000633034	1	chip1_peak_4132
chr12	88799800	88800000	200	233.353	4.23568	0.000835955	0.648365	chip2_peak_12627
chr6	70077200	70077500	300	233.355	4.23572	0.000332732	0.551899	chip2_peak_5679
chr16	29820500	29820700	200	233.365	4.2359	0.000169387	0.450948	chip2_peak_3449
chr1	187255000	187255200	200	208.285	4.236	7.31911e-05	1	chip1_peak_519
chr9	67821100	67821400	300	208.302	4.23634	0.000584936	1	chip1_peak_3771
chr5	53771100	53771300	200	233.39	4.23635	0.00094765	0.656668	chip2_peak_14174
chr3	125093700	125094000	300	233.421	4.23691	0.000634173	0.625263	chip2_peak_9833
chr11	64977600	64977800	200	233.435	4.23718	0.000646517	0.626538	chip2_peak_10008
chr11	62819400	62819600	200	233.46	4.23762	0.000829219	0.648139	chip2_peak_12531
chr6	20039100	20039300	200	233.46	4.23762	0.000829219	0.648139	chip2_peak_12532
chr9	89276400	89276600	200	233.477	4.23793	0.000168514	0.450142	chip2_peak_3435
chr4	57268800	57269000	200	208.389	4.23811	0.000641794	1	chip1_peak_4180
chr2	135018900	135019100	200	233.501	4.23838	0.000430016	0.583172	chip2_peak_6998
chr1	134435700	134435900	200	233.503	4.23841	0.000881606	0.651913	chip2_peak_13262
chr5	111219200	111219400	200	233.504	4.23842	0.0002482	0.507706	chip2_peak_4537
chr16	86586100	86586400	300	233.511	4.23854	5.13566e-05	0.294625	chip2_peak_1533
chr15	81237200	81237400	200	208.426	4.23886	5.42712e-05	1	chip1_peak_410
chr9	55183000	55183200	200	233.532	4.23894	0.000827042	0.648074	chip2_peak_12492
chr17	86610900	86611100	200	208.455	4.23946	0.000417264	1	chip1_peak_2659
chr11	101964300	101964500	200	208.471	4.23978	0.000962524	1	chip1_peak_6545
chr5	5269400	5269600	200	233.588	4.23995	0.000201227	0.479105	chip2_peak_3884
chr4	47803800	47804000	200	233.597	4.24011	0.00044065	0.585964	chip2_peak_7146
chr8	26960800	26961000	200	233.604	4.24024	0.000799781	0.645695	chip2_peak_12097
chr2	92952400	92952600	200	233.613	4.2404	0.000940193	0.655535	chip2_peak_14084
chr7	71784300	71784500	200	208.534	4.24106	0.000611703	1	chip1_peak_3975
chr13	9768600	9768800	200	233.673	4.24149	0.000632371	0.624864	chip2_peak_9807
chr9	83109300	83109500	200	233.673	4.24149	0.000632371	0.624864	chip2_peak_9808
chr6	83307000	83307200	200	233.713	4.24222	0.000697278	0.632319	chip2_peak_10729
chr17	28144600	28144800	200	208.614	4.24268	0.000195808	1	chip1_peak_1233
chr18	76356500	76356700	200	233.742	4.24275	0.000630717	0.624864	chip2_peak_9785
chr18	17983200	17983400	200	233.742	4.24275	0.00055612	0.610384	chip2_peak_8776
chr11	84425300	84425500	200	208.634	4.2431	0.000517592	1	chip1_peak_3310
chr3	103794000	103794200	200	233.764	4.24314	0.000727251	0.63839	chip2_peak_11089
chr6	32871500	32871700	200	233.79	4.24361	8.73779e-05	0.357971	chip2_peak_2189
chr19	5375400	5375800	400	233.806	4.2439	1.03428e-05	0.137386	chip2_peak_632
chr4	104788100	104788300	200	208.704	4.24453	0.000197556	1	chip1_peak_1250
chr1	23108300	23108500	200	208.711	4.24466	0.000556565	1	chip1_peak_3590
chr9	22088400	22088600	200	208.749	4.24543	0.000149962	1	chip1_peak_962
chr14	104896900	104897100	200	208.749	4.24543	0.000479335	1	chip1_peak_3059
chr8	46368100	46368300	200	233.927	4.2461	0.000618585	0.622723	chip2_peak_9617
chr9	33183700	33184000	300	233.932	4.24619	0.000124444	0.40913	chip2_peak_2760
chr13	26047400	26047600	200	233.949	4.24651	0.00062578	0.623841	chip2_peak_9720
chr1	89844200	89844400	200	233.949	4.24651	0.00062578	0.623841	chip2_peak_9721
chr6	146763600	146763800	200	208.807	4.24662	0.000765211	1	chip1_peak_5067
chr6	145052200	145052400	200	208.836	4.24721	0.000747483	1	chip1_peak_4926
chr9	118665300	118665500	200	208.836	4.24721	0.000412992	1	chip1_peak_2619
chr14	48457800	48458100	300	233.991	4.24726	0.000650725	0.62698	chip2_peak_10077
chr17	10307800	10308000	200	233.991	4.24726	0.000123416	0.407426	chip2_peak_2749
chr5	38497300	38497500	200	234	4.24743	0.000324355	0.548562	chip2_peak_5563
chr8	82418700	82418900	200	208.881	4.24811	0.000470085	1	chip1_peak_3001
chr18	73635200	73635500	300	234.051	4.24835	4.55865e-05	0.279241	chip2_peak_1425
chr12	54438000	54438300	300	234.071	4.24873	0.000154156	0.438551	chip2_peak_3207
chr3	60467800	60468000	200	208.955	4.24963	0.000416596	1	chip1_peak_2653
chr3	100835500	100835700	200	208.986	4.25025	0.000474319	1	chip1_peak_3026
chr6	56721900	56722100	200	234.215	4.25132	0.000312465	0.540282	chip2_peak_5427
chr7	141874800	141875100	300	209.047	4.25149	0.000528367	1	chip1_peak_3386
chr17	32519900	32520100	200	234.228	4.25157	5.07547e-05	0.293644	chip2_peak_1520
chr4	129909700	129909900	200	209.068	4.25192	0.000408677	1	chip1_peak_2592
chr14	25018100	25018300	200	209.071	4.25198	0.000405935	1	chip1_peak_2571
chr9	79286700	79286900	200	234.276	4.25244	0.000311654	0.540282	chip2_peak_5412
chr8	22901000	22901200	200	234.276	4.25244	0.000311654	0.540282	chip2_peak_5413
chr8	77499600	77499800	200	234.286	4.25261	0.000772078	0.643976	chip2_peak_11689
chr5	35434600	35434800	200	209.116	4.2529	0.000905914	1	chip1_peak_6096
chr12	79523400	79523700	300	209.138	4.25334	0.000320145	1	chip1_peak_2014
chr5	149954500	149954700	200	234.352	4.25382	0.000745305	0.639178	chip2_peak_11377
chr16	16422500	16422800	300	234.372	4.25417	0.000300027	0.534741	chip2_peak_5263
chr6	127921200	127921400	200	234.384	4.2544	0.000555511	0.610384	chip2_peak_8762
chr8	105548800	105549100	300	209.208	4.25477	0.000206866	1	chip1_peak_1316
chr15	40579600	40579800	200	234.412	4.25491	0.000824355	0.647942	chip2_peak_12459
chrX	48462300	48462500	200	209.223	4.25507	0.000469356	1	chip1_peak_2995
chr10	25950200	25950400	200	209.223	4.25507	0.000469356	1	chip1_peak_2996
chr4	11375200	11375400	200	234.426	4.25516	0.000590756	0.617171	chip2_peak_9245
chr12	99689400	99689600	200	234.458	4.25575	0.00016102	0.442487	chip2_peak_3332
chr6	145439600	145439800	200	209.263	4.25589	0.000860199	1	chip1_peak_5746
chr3	156283600	156283800	200	234.485	4.25623	0.000822192	0.647586	chip2_peak_12428
chr8	77569300	77569500	200	234.485	4.25623	0.000822192	0.647586	chip2_peak_12429
chr8	90821100	90821300	200	234.485	4.25623	0.000822192	0.647586	chip2_peak_12430
chr6	145463700	145463900	200	209.313	4.2569	0.000825768	1	chip1_peak_5501
chr16	49909500	49909700	200	234.552	4.25745	0.000382808	0.568576	chip2_peak_6373
chr1	104604400	104604600	200	209.343	4.25752	0.000747176	1	chip1_peak_4920
chr4	128937700	128937900	200	209.343	4.25752	0.000801058	1	chip1_peak_5342
chr16	3836000	3836200	200	234.558	4.25755	0.000820035	0.64742	chip2_peak_12396
chr7	92475600	92475800	200	234.564	4.25767	0.000847301	0.649849	chip2_peak_12767
chr1	157343700	157343900	200	234.569	4.25775	7.81105e-05	0.344608	chip2_peak_2021
chr15	98061300	98061500	200	234.588	4.2581	0.000551172	0.609269	chip2_peak_8702
chr12	34906100	34906300	200	234.59	4.25814	0.000795909	0.64519	chip2_peak_12052
chr14	33078200	33078400	200	209.394	4.25855	0.000524155	1	chip1_peak_3360
chr15	27986800	27987000	200	209.398	4.25863	0.000166251	1	chip1_peak_1047
chr10	18451400	18451600	200	234.663	4.25945	0.000793822	0.645125	chip2_peak_12019
chr17	46397100	46397300	200	234.692	4.25999	0.000551285	0.609269	chip2_peak_8704
chr1	37271600	37271900	300	234.711	4.26034	0.000204665	0.48183	chip2_peak_3929
chr5	45706700	45707000	300	209.492	4.26055	0.000407852	1	chip1_peak_2585
chr10	114228200	114228400	200	234.735	4.26077	0.000791741	0.644502	chip2_peak_11994
chr1	95324600	95324800	200	234.735	4.26077	0.000791741	0.644502	chip2_peak_11995
chr6	32890800	32891000	200	234.767	4.26135	0.000218173	0.490794	chip2_peak_4112
chr17	71027100	71027300	200	234.771	4.26142	0.000902368	0.653817	chip2_peak_13550
chr18	77055900	77056100	200	234.776	4.26152	0.000813599	0.646522	chip2_peak_12308
chr8	121058600	121058800	200	234.79	4.26177	0.000636243	0.625405	chip2_peak_9863
chr12	5129000	5129200	200	209.561	4.26195	0.00060203	1	chip1_peak_3912
chr17	72177400	72177600	200	209.561	4.26195	0.000923796	1	chip1_peak_6240
chr1	131423800	131424000	200	234.822	4.26235	0.000102869	0.380202	chip2_peak_2449
chr18	77540000	77540300	300	234.831	4.26251	0.000121491	0.404202	chip2_peak_2733
chr4	130034300	130034500	200	234.831	4.26252	0.00040753	0.575064	chip2_peak_6717
chr13	103464200	103464400	200	234.845	4.26277	0.000899998	0.653544	chip2_peak_13516
chr11	75104600	75104800	200	234.845	4.26277	0.000899998	0.653544	chip2_peak_13517
chr12	89124800	89125000	200	234.846	4.26279	0.000791904	0.644502	chip2_peak_11997
chr1	74701600	74701800	200	234.857	4.26298	0.000121762	0.404612	chip2_peak_2735
chr7	40459000	40459200	200	234.885	4.26349	0.000586916	0.616533	chip2_peak_9191
chr7	127102800	127103000	200	234.896	4.26369	0.00040647	0.574901	chip2_peak_6696
chr4	151825700	151825900	200	209.668	4.26413	0.000582765	1	chip1_peak_3753
chr12	105353300	105353600	300	209.693	4.26464	0.00013921	1	chip1_peak_906
chr12	31532400	31532600	200	234.954	4.26474	0.000607685	0.620411	chip2_peak_9475
chr15	37980600	37980900	300	234.981	4.26524	0.000278806	0.525819	chip2_peak_4953
chr16	11078000	11078200	200	234.997	4.26553	0.000461578	0.590049	chip2_peak_7458
chr9	45238200	45238500	300	209.74	4.26559	7.21144e-05	1	chip1_peak_517
chr16	90182100	90182300	200	235.034	4.2662	0.00089782	0.65332	chip2_peak_13491
chr2	131672800	131673000	200	235.034	4.2662	0.00089782	0.65332	chip2_peak_13492
chr1	39618600	39618800	200	235.034	4.2662	0.00089782	0.65332	chip2_peak_13493
chr17	90171300	90171500	200	235.064	4.26674	0.000785693	0.643976	chip2_peak_11892
chr4	140891500	140891700	200	235.064	4.26674	0.000785693	0.643976	chip2_peak_11893
chr7	144107800	144108000	200	209.81	4.26702	0.000664792	1	chip1_peak_4334
chr1	80558200	80558600	400	235.087	4.26715	0.000559623	0.610954	chip2_peak_8825
chr15	7885300	7885500	200	235.089	4.26719	0.000933178	0.654834	chip2_peak_13991
chr16	81387700	81387900	200	209.823	4.26728	0.000450589	1	chip1_peak_2857
chr6	77548700	77548900	200	209.823	4.26728	0.000961339	1	chip1_peak_6535
chr11	61123500	61123700	200	235.096	4.26732	0.000599166	0.618135	chip2_peak_9375
chr9	6263400	6263700	300	235.158	4.26845	0.000238262	0.501574	chip2_peak_4403
chr13	55762800	55763000	200	235.165	4.26857	0.000597601	0.617901	chip2_peak_9349
chr2	149087800	149088000	200	235.165	4.26857	0.000597601	0.617901	chip2_peak_9350
chr14	47324100	47324400	300	235.176	4.26878	0.000360958	0.561464	chip2_peak_6083
chr4	95629900	95630200	300	235.207	4.26933	3.75649e-05	0.256404	chip2_peak_1272
chr7	4838000	4838200	200	209.944	4.26974	0.000584195	1	chip1_peak_3763
chr11	84250800	84251000	200	209.954	4.26994	0.000182848	1	chip1_peak_1155
chr4	149596100	149596400	300	235.247	4.27006	0.000203945	0.481124	chip2_peak_3923
chr8	107590800	107591000	200	235.261	4.27032	0.000800952	0.645897	chip2_peak_12114
chr7	116360400	116360600	200	209.979	4.27044	0.000185211	1	chip1_peak_1166
chr5	150585400	150585600	200	235.276	4.27058	0.000184796	0.465107	chip2_peak_3657
chr13	63190800	63191100	300	209.995	4.27077	0.000870714	1	chip1_peak_5815
chr11	49267800	49268000	200	235.336	4.27168	0.000306649	0.537402	chip2_peak_5354
chr5	21029200	21029400	200	210.074	4.27239	0.000234298	1	chip1_peak_1504
chr2	31159600	31159800	200	235.377	4.27243	0.00043334	0.583845	chip2_peak_7048
chr7	78082000	78082300	300	235.387	4.2726	0.000691726	0.632282	chip2_peak_10634
chr8	15138200	15138400	200	210.088	4.27267	0.000891022	1	chip1_peak_5974
chr7	39536300	39536500	200	235.393	4.27272	0.00029856	0.534126	chip2_peak_5244
chr3	105754700	105755000	300	210.144	4.27381	0.000776779	1	chip1_peak_5139
chr18	84485100	84485300	200	235.513	4.27489	0.000996835	0.659819	chip2_peak_14869
chr16	58511800	58512000	200	235.547	4.27551	0.000747286	0.639428	chip2_peak_11409
chr14	120158800	120159000	200	235.578	4.27608	0.000530536	0.605076	chip2_peak_8393
chr12	4835500	4835700	200	235.595	4.27638	0.000174072	0.456356	chip2_peak_3504
chr18	56653900	56654100	200	235.644	4.27727	0.000225971	0.493419	chip2_peak_4249
chr12	100921100	100921400	300	235.669	4.27772	0.00013971	0.425478	chip2_peak_2991
chr16	33326200	33326500	300	210.35	4.278	0.000298543	1	chip1_peak_1870
chr11	76503500	76503800	300	210.392	4.27886	0.000588377	1	chip1_peak_3810
chr16	31341900	31342100	200	235.782	4.27977	0.000526397	0.604209	chip2_peak_8333
chr9	46025000	46025300	300	210.449	4.28	0.000154382	1	chip1_peak_979
chr15	4063100	4063300	200	235.8	4.2801	0.000285467	0.529829	chip2_peak_5029
chr14	74959800	74960100	300	235.805	4.28018	0.000274205	0.524803	chip2_peak_4881
chr9	119135800	119136100	300	235.805	4.28019	0.000109038	0.387241	chip2_peak_2551
chr9	72439300	72439500	200	210.471	4.28045	0.000372889	1	chip1_peak_2358
chr11	88897500	88897900	400	235.826	4.28057	3.03515e-07	0.0164787	chip2_peak_141
chr12	54567900	54568100	200	235.88	4.28156	0.000402018	0.573254	chip2_peak_6643
chr14	73322900	73323100	200	235.912	4.28214	0.000780949	0.643976	chip2_peak_11816
chr7	114114100	114114300	200	235.933	4.28252	0.000580462	0.614375	chip2_peak_9122
chr9	70348000	70348200	200	235.938	4.2826	0.000757988	0.641657	chip2_peak_11535
chr13	17412400	17412700	300	235.95	4.28282	5.4583e-06	0.0948991	chip2_peak_467
chr4	101673300	101673500	200	236.029	4.28425	0.000862972	0.651913	chip2_peak_12957
chr7	144380400	144380600	200	210.673	4.28457	0.000519528	1	chip1_peak_3325
chr11	18573000	18573200	200	236.058	4.28479	0.000776863	0.643976	chip2_peak_11754
chr1	158089100	158089300	200	236.083	4.28523	0.000754024	0.64033	chip2_peak_11495
chr12	56977800	56978000	200	210.716	4.28543	0.000371394	1	chip1_peak_2349
chr11	84815400	84815600	200	236.123	4.28596	0.000756161	0.641155	chip2_peak_11513
chr18	75841600	75841800	200	236.204	4.28744	0.000396821	0.572112	chip2_peak_6565
chr15	9121400	9121700	300	210.821	4.28758	0.000742798	1	chip1_peak_4889
chr18	84193300	84193500	200	210.828	4.28771	0.000416038	1	chip1_peak_2645
chr19	58400900	58401100	200	210.831	4.28777	0.000278651	1	chip1_peak_1765
chr6	139616300	139616500	200	236.227	4.28784	0.000857056	0.651578	chip2_peak_12894
chr2	7904200	7904400	200	210.837	4.28791	0.000377162	1	chip1_peak_2388
chr4	9581500	9581700	200	236.249	4.28826	0.000992704	0.659169	chip2_peak_14815
chr14	40554600	40554800	200	236.268	4.28859	0.000752207	0.640016	chip2_peak_11470
chr2	92809500	92809700	200	236.291	4.28902	0.000286265	0.530369	chip2_peak_5041
chr11	93986000	93986400	400	236.373	4.2905	0.000327896	0.55008	chip2_peak_5614
chr18	70436600	70436800	200	236.375	4.29054	0.000852568	0.650317	chip2_peak_12851
chr8	87982700	87983000	300	236.421	4.29138	0.000348116	0.556528	chip2_peak_5913
chr19	6843800	6844100	300	211.082	4.29287	0.000192823	1	chip1_peak_1207
chr9	122886100	122886300	200	211.101	4.29327	0.000248275	1	chip1_peak_1581
chr14	103726500	103726700	200	236.541	4.29355	7.79367e-05	0.344468	chip2_peak_2018
chr5	54888300	54888500	200	236.565	4.29399	0.000850511	0.649876	chip2_peak_12825
chr3	54045700	54045900	200	236.565	4.29399	0.000850511	0.649876	chip2_peak_12826
chr12	49034800	49035100	300	236.59	4.29444	6.25974e-05	0.322835	chip2_peak_1709
chr7	100561700	100561900	200	211.162	4.29451	0.000629524	1	chip1_peak_4107
chr10	67090600	67090800	200	236.595	4.29454	0.000166338	0.449063	chip2_peak_3395
chr2	6603700	6603900	200	236.61	4.2948	0.000290684	0.531461	chip2_peak_5116
chr9	87993400	87993600	200	236.623	4.29505	0.000959262	0.657711	chip2_peak_14335
chr19	58327800	58328000	200	211.231	4.29592	0.000813969	1	chip1_peak_5421
chr12	56439300	56439500	200	211.244	4.29617	0.000483639	1	chip1_peak_3081
chr19	42041200	42041400	200	211.259	4.29648	0.000490078	1	chip1_peak_3118
chr8	37948600	37948800	200	236.768	4.29768	0.000991367	0.659073	chip2_peak_14799
chr5	34395800	34396000	200	236.778	4.29785	0.000134289	0.419972	chip2_peak_2901
chr2	135168800	135169000	200	236.796	4.29817	0.000756504	0.641155	chip2_peak_11518
chr10	91001500	91001800	300	236.82	4.29862	6.64708e-05	0.330466	chip2_peak_1777
chr4	84540500	84540700	200	236.833	4.29885	0.000133944	0.419744	chip2_peak_2896
chr12	38393100	38393500	400	236.835	4.29888	9.16396e-05	0.365775	chip2_peak_2256
chr4	152205400	152205600	200	236.84	4.29898	0.000505393	0.600109	chip2_peak_8046
chr3	143078100	143078300	200	236.845	4.29907	0.000988763	0.658794	chip2_peak_14765
chr9	27432100	27432300	200	236.845	4.29907	0.000988763	0.658794	chip2_peak_14766
chr2	93718300	93718500	200	211.398	4.29932	0.000978466	1	chip1_peak_6662
chr16	34056300	34056500	200	211.403	4.29942	0.000568912	1	chip1_peak_3664
chr7	97593300	97593500	200	236.893	4.29995	2.97138e-05	0.230109	chip2_peak_1109
chr17	12516900	12517100	200	211.432	4.3	0.000626988	1	chip1_peak_4089
chr9	29834900	29835100	200	236.922	4.30046	0.000986166	0.658559	chip2_peak_14724
chr7	29347800	29348100	300	211.466	4.30069	0.000259904	1	chip1_peak_1649
chr8	17764900	17765100	200	211.475	4.30088	0.000865917	1	chip1_peak_5784
chr10	122807600	122807800	200	236.976	4.30144	0.000502764	0.599984	chip2_peak_8003
chr17	46142600	46142900	300	211.517	4.30174	3.68619e-05	1	chip1_peak_298
chr3	38360200	38360500	300	236.997	4.30183	0.000150618	0.437113	chip2_peak_3139
chr15	96150300	96150500	200	236.998	4.30185	0.000983577	0.65817	chip2_peak_14690
chr6	127567800	127568000	200	236.998	4.30185	0.000983577	0.65817	chip2_peak_14691
chr4	25656900	25657100	200	236.998	4.30185	0.000983577	0.65817	chip2_peak_14692
chr4	104753200	104753400	200	236.998	4.30185	0.000983577	0.65817	chip2_peak_14693
chr1	129299000	129299200	200	236.998	4.30185	0.000983577	0.65817	chip2_peak_14694
chr6	8817200	8817400	200	237.016	4.30217	0.000865544	0.651913	chip2_peak_12996
chr11	75693900	75694100	200	211.553	4.30246	0.000171038	1	chip1_peak_1077
chr9	98579400	98579600	200	237.043	4.30267	0.000501455	0.599984	chip2_peak_7982
chr7	79449200	79449500	300	237.071	4.30317	0.000586147	0.616497	chip2_peak_9177
chr19	53279800	53280000	200	237.075	4.30324	0.000980994	0.658047	chip2_peak_14652
chr3	137490700	137490900	200	237.075	4.30324	0.000980994	0.658047	chip2_peak_14653
chr2	161810300	161810500	200	237.075	4.30324	0.000980994	0.658047	chip2_peak_14654
chr3	54005700	54005900	200	237.133	4.3043	0.000249769	0.508444	chip2_peak_4562
chr12	7752100	7752300	200	237.149	4.30459	0.000242514	0.504143	chip2_peak_4460
chr2	145591200	145591400	200	237.149	4.30459	0.000554376	0.610103	chip2_peak_8747
chr1	12373100	12373300	200	237.15	4.3046	0.00050156	0.599984	chip2_peak_7985
chr11	70220200	70220400	200	237.184	4.30523	0.000153637	0.438492	chip2_peak_3198
chr18	68697600	68697900	300	211.71	4.30566	0.000589841	1	chip1_peak_3826
chr6	119435300	119435900	600	211.724	4.30594	1.56533e-05	0.778712	chip1_peak_168
chr9	100645600	100645800	200	237.267	4.30673	0.000892984	0.65225	chip2_peak_13440
chr19	38925400	38925600	200	237.271	4.30681	0.000978626	0.658047	chip2_peak_14613
chr16	20234700	20235000	300	237.275	4.30688	0.000152511	0.437748	chip2_peak_3178
chr8	25429800	25430000	200	237.287	4.30709	0.000551489	0.609269	chip2_peak_8710
chr18	74716700	74716900	200	237.339	4.30804	7.48795e-05	0.340671	chip2_peak_1953
chr15	83776300	83776500	200	237.34	4.30806	0.000741832	0.638827	chip2_peak_11320
chr5	38542700	38543000	300	237.343	4.30811	8.80203e-05	0.359002	chip2_peak_2198
chr13	113939700	113939900	200	211.841	4.30832	0.000546497	1	chip1_peak_3526
chr13	14675300	14675500	200	237.362	4.30845	0.000368009	0.564165	chip2_peak_6174
chr14	121794100	121794300	200	237.362	4.30845	0.000368009	0.564165	chip2_peak_6175
chr18	80373400	80373600	200	237.373	4.30865	0.000533947	0.605729	chip2_peak_8442
chr8	77104000	77104200	200	237.39	4.30896	0.000278457	0.525819	chip2_peak_4944
chr11	98279100	98279300	200	237.399	4.30913	0.000153146	0.437869	chip2_peak_3191
chr3	87355100	87355300	200	237.468	4.31037	0.000406709	0.574901	chip2_peak_6706
chr9	22812300	22812500	200	237.503	4.31101	0.000913925	0.65458	chip2_peak_13671
chr11	72402400	72402600	200	211.999	4.31153	0.000403716	1	chip1_peak_2555
chr12	81969100	81969400	300	212.036	4.31228	0.000661189	1	chip1_peak_4307
chr8	80701900	80702100	200	237.583	4.31247	0.000760465	0.64238	chip2_peak_11552
chr3	24982400	24982600	200	237.596	4.31269	0.000896873	0.653052	chip2_peak_13485
chr16	42103400	42103600	200	237.608	4.31291	0.000816222	0.646745	chip2_peak_12344
chr2	170348200	170348400	200	237.608	4.31291	0.000816222	0.646745	chip2_peak_12345
chr12	50365200	50365400	200	237.624	4.31322	0.000213278	0.486873	chip2_peak_4051
chr5	124904500	124904700	200	237.63	4.31332	8.1798e-05	0.348548	chip2_peak_2089
chr18	81821600	81821800	200	212.102	4.31364	0.000967531	1	chip1_peak_6575
chr7	96417200	96417400	200	237.682	4.31427	0.000265425	0.519631	chip2_peak_4765
chr9	35102200	35102400	200	212.134	4.31429	0.000401141	1	chip1_peak_2531
chr9	102190300	102190600	300	237.695	4.3145	0.00013534	0.421666	chip2_peak_2915
chr6	33020100	33020300	200	237.73	4.31514	0.000402501	0.573254	chip2_peak_6653
chr1	39849300	39849500	200	237.761	4.31569	0.000937885	0.655357	chip2_peak_14050
chr11	3504400	3504600	200	237.785	4.31613	0.000346907	0.556528	chip2_peak_5888
chr4	53933200	53933400	200	212.232	4.31628	0.000530036	1	chip1_peak_3401
chr3	58684100	58684400	300	212.237	4.31638	0.000318897	1	chip1_peak_2006
chr4	149467400	149467600	200	237.806	4.31652	0.00065667	0.628032	chip2_peak_10153
chr5	74858500	74858800	300	237.831	4.31696	0.000773484	0.643976	chip2_peak_11706
chr6	140666700	140666900	200	237.847	4.31725	0.000248715	0.507706	chip2_peak_4548
chr4	114644700	114644900	200	237.861	4.31752	0.000400413	0.572901	chip2_peak_6618
chr11	105279300	105279500	200	237.88	4.31785	0.000156919	0.441108	chip2_peak_3253
chr5	106991400	106991600	200	212.31	4.31787	6.61887e-05	1	chip1_peak_479
chr14	120310400	120310700	300	212.312	4.31791	0.000257739	1	chip1_peak_1637
chr8	107895300	107895500	200	237.891	4.31806	0.00015238	0.437748	chip2_peak_3174
chr10	43943800	43944000	200	237.909	4.31839	0.000438724	0.585428	chip2_peak_7121
chr11	104310000	104310200	200	237.927	4.31871	0.000399374	0.572668	chip2_peak_6605
chr8	30993500	30993700	200	237.931	4.31879	0.000305249	0.536799	chip2_peak_5333
chr1	185685600	185685800	200	212.368	4.31905	0.000460597	1	chip1_peak_2930
chr13	37775500	37775700	200	212.369	4.31905	0.000781692	1	chip1_peak_5189
chr1	173963100	173963300	200	237.947	4.31908	0.000810001	0.646243	chip2_peak_12251
chr2	145518300	145518500	200	237.979	4.31965	0.000805594	0.646243	chip2_peak_12173
chr11	61260500	61260700	200	238.011	4.32023	0.000107145	0.386017	chip2_peak_2507
chr3	117988700	117988900	200	238.041	4.32078	0.00068678	0.631542	chip2_peak_10574
chr1	105745200	105745500	300	238.057	4.32106	0.000576513	0.613453	chip2_peak_9071
chr10	35267700	35267900	200	238.091	4.32169	0.000878183	0.651913	chip2_peak_13196
chr19	43720000	43720200	200	212.499	4.3217	0.00054485	1	chip1_peak_3514
chr11	72056100	72056300	200	212.499	4.3217	0.000922258	1	chip1_peak_6224
chr11	20712200	20712400	200	212.525	4.32222	0.000558518	1	chip1_peak_3598
chr6	112470700	112470900	200	238.17	4.32311	0.000480219	0.593193	chip2_peak_7734
chr14	16999800	17000100	300	238.178	4.32327	0.000133546	0.419337	chip2_peak_2890
chr11	79240100	79240300	200	212.603	4.32382	0.000122486	1	chip1_peak_802
chr11	3505200	3505400	200	238.236	4.32432	0.000697538	0.632319	chip2_peak_10734
chr6	8077700	8077900	200	238.237	4.32434	0.00047897	0.593161	chip2_peak_7710
chr12	103986900	103987100	200	212.634	4.32445	0.000993118	1	chip1_peak_6772
chr12	116635300	116635500	200	238.297	4.32543	0.000294955	0.532796	chip2_peak_5186
chr4	116331400	116331600	200	238.305	4.32557	0.000477724	0.592997	chip2_peak_7693
chr10	19870200	19870400	200	238.309	4.32564	0.000695716	0.632319	chip2_peak_10703
chr11	59736100	59736300	200	212.701	4.3258	0.000204553	1	chip1_peak_1299
chr10	4236500	4236700	200	212.703	4.32586	0.000807224	1	chip1_peak_5387
chr9	61335300	61335500	200	212.708	4.32596	0.000210801	1	chip1_peak_1334
chr4	89395600	89395800	200	238.346	4.32632	0.000939114	0.655357	chip2_peak_14066
chr9	89436900	89437100	200	238.346	4.32632	0.000939114	0.655357	chip2_peak_14067
chr7	29075900	29076100	200	238.351	4.3264	0.000637578	0.625544	chip2_peak_9881
chr15	84955700	84955900	200	238.365	4.32666	0.000280281	0.526737	chip2_peak_4971
chr9	103422800	103423000	200	238.368	4.32672	0.000244304	0.505427	chip2_peak_4480
chr12	29411900	29412100	200	238.373	4.32681	0.000476482	0.592918	chip2_peak_7675
chr14	46781700	46781900	200	212.753	4.32687	0.000909399	1	chip1_peak_6128
chr9	119037500	119037700	200	238.377	4.32687	0.000833963	0.648347	chip2_peak_12596
chr13	10174000	10174200	200	238.423	4.32771	0.000936651	0.655321	chip2_peak_14033
chr9	42211600	42211900	300	238.451	4.32821	0.000483081	0.594394	chip2_peak_7766
chr4	137555500	137555700	200	238.459	4.32836	0.000261309	0.516359	chip2_peak_4715
chr9	88349800	88350000	200	238.498	4.32907	0.000518516	0.602542	chip2_peak_8225
chr6	146406800	146407000	200	212.911	4.33007	0.000260456	1	chip1_peak_1654
chr1	144493200	144493400	200	238.56	4.3302	0.00025213	0.510656	chip2_peak_4589
chr19	36962500	36962700	200	212.922	4.3303	0.00015962	1	chip1_peak_1006
chr6	147032600	147032800	200	238.572	4.33041	0.000525368	0.60409	chip2_peak_8320
chr4	36530400	36530600	200	238.576	4.33049	0.000931746	0.654719	chip2_peak_13967
chr16	23229800	23230000	200	212.935	4.33056	0.000995859	1	chip1_peak_6795
chr6	54311600	54311800	200	212.935	4.33056	0.000995859	1	chip1_peak_6796
chr7	109891000	109891200	200	238.586	4.33068	0.000958292	0.657618	chip2_peak_14326
chr12	33385500	33385700	200	212.959	4.33105	0.000897406	1	chip1_peak_6022
chr6	143213900	143214100	200	238.622	4.33132	0.000708425	0.633695	chip2_peak_10878
chr2	156106200	156106500	300	238.624	4.33136	0.000305009	0.536793	chip2_peak_5330
chr6	140744500	140744700	200	212.997	4.33184	0.000451258	1	chip1_peak_2860
chr16	32741200	32741400	200	238.651	4.33185	0.000508667	0.600294	chip2_peak_8101
chr2	58832700	58832900	200	238.653	4.33188	0.000929304	0.654701	chip2_peak_13935
chr9	103738100	103738400	300	213.015	4.33219	0.000202084	1	chip1_peak_1283
chr9	114831400	114831600	200	213.035	4.33259	0.000506152	1	chip1_peak_3231
chr15	88965500	88965700	200	238.697	4.33269	0.000931948	0.654719	chip2_peak_13972
chr2	180684000	180684200	200	213.08	4.33351	0.000983149	1	chip1_peak_6696
chr4	140619900	140620100	200	213.099	4.33391	0.000234026	1	chip1_peak_1501
chr1	93289500	93289700	200	213.114	4.3342	0.000392238	1	chip1_peak_2472
chr4	104791900	104792100	200	213.122	4.33437	0.000253388	1	chip1_peak_1613
chr19	46406900	46407100	200	213.127	4.33448	0.000137195	1	chip1_peak_895
chr14	113404000	113404200	200	238.8	4.33456	0.0008941	0.652391	chip2_peak_13455
chr3	135178500	135178700	200	238.811	4.33476	0.000397087	0.57225	chip2_peak_6568
chr6	128038800	128039000	200	213.148	4.3349	0.00094469	1	chip1_peak_6416
chr11	23261000	23261200	200	213.23	4.33657	0.000577387	1	chip1_peak_3720
chr17	14381200	14381500	300	238.911	4.33657	0.000430922	0.583172	chip2_peak_7015
chr18	84014200	84014500	300	213.234	4.33664	0.000311232	1	chip1_peak_1944
chr17	64292700	64292900	200	238.952	4.33731	0.000383505	0.568576	chip2_peak_6383
chr9	41441000	41441200	200	238.952	4.33731	0.000383505	0.568576	chip2_peak_6385
chr14	77288400	77288600	200	238.995	4.33809	0.000832265	0.648327	chip2_peak_12570
chr2	25651000	25651200	200	213.329	4.33858	0.000953107	1	chip1_peak_6476
chr3	95505800	95506000	200	213.336	4.33872	0.000187055	1	chip1_peak_1174
chr8	110685700	110685900	200	239.04	4.33891	0.000342368	0.556009	chip2_peak_5805
chr1	19389800	19390000	200	213.35	4.33901	0.00098488	1	chip1_peak_6706
chr15	11113000	11113200	200	213.365	4.33931	0.000648826	1	chip1_peak_4231
chr10	50738200	50738400	200	239.064	4.33935	0.00062715	0.623987	chip2_peak_9744
chr7	27922300	27922500	200	213.369	4.33939	0.000390673	1	chip1_peak_2462
chr1	121562500	121562800	300	239.078	4.33961	0.000188553	0.468312	chip2_peak_3711
chr3	118017900	118018200	300	239.1	4.34	0.000724383	0.637245	chip2_peak_11061
chr18	12992600	12992800	200	239.138	4.34068	0.000773329	0.643976	chip2_peak_11703
chr18	72698800	72699000	200	239.181	4.34147	0.000775525	0.643976	chip2_peak_11734
chr19	40686600	40686800	200	213.474	4.34154	0.000448225	1	chip1_peak_2841
chr16	33462400	33462600	200	213.482	4.34168	0.000441897	1	chip1_peak_2802
chr19	31762200	31762400	200	239.214	4.34207	0.000889463	0.651913	chip2_peak_13390
chr1	87285400	87285600	200	239.222	4.34222	0.000234594	0.500032	chip2_peak_4354
chr13	113856000	113856200	200	213.518	4.34243	0.000560519	1	chip1_peak_3612
chr11	47305100	47305400	300	239.236	4.34246	0.000138841	0.425286	chip2_peak_2969
chr11	45249300	45249500	200	239.248	4.34268	0.000796934	0.645299	chip2_peak_12066
chr2	161071800	161072000	200	239.281	4.34328	0.000197732	0.476986	chip2_peak_3830
chr10	37256800	37257100	300	239.295	4.34353	0.000540774	0.606678	chip2_peak_8565
chr7	34664000	34664200	200	213.588	4.34385	0.00024322	1	chip1_peak_1555
chr1	46022600	46022800	200	239.32	4.344	0.000624019	0.623754	chip2_peak_9693
chr7	29490200	29490400	200	213.612	4.34433	0.000255014	1	chip1_peak_1622
chr19	58281500	58281700	200	213.612	4.34433	0.00035222	1	chip1_peak_2229
chr4	139618100	139618300	200	213.612	4.34433	0.000407594	1	chip1_peak_2583
chr17	30231400	30231600	200	213.628	4.34466	0.000949263	1	chip1_peak_6443
chr6	84591700	84591900	200	213.628	4.34466	0.000949263	1	chip1_peak_6444
chr10	20119900	20120100	200	213.655	4.34521	0.000731775	1	chip1_peak_4810
chr1	175446100	175446300	200	239.409	4.34561	0.000585422	0.616408	chip2_peak_9166
chr2	144397300	144397500	200	239.414	4.3457	0.000258482	0.514825	chip2_peak_4674
chr2	91626000	91626200	200	213.694	4.34601	5.35448e-05	1	chip1_peak_403
chr7	37750000	37750200	200	213.782	4.34779	0.000296046	1	chip1_peak_1858
chr5	48169000	48169200	200	239.535	4.34789	0.000619151	0.622723	chip2_peak_9632
chr4	106418800	106419100	300	239.544	4.34806	0.000436543	0.584866	chip2_peak_7086
chr7	72307400	72307600	200	213.806	4.34828	0.000327541	1	chip1_peak_2070
chr13	112866900	112867100	200	239.584	4.34878	0.000664428	0.628686	chip2_peak_10262
chr1	13245600	13245800	200	239.635	4.34971	0.000453964	0.588348	chip2_peak_7354
chr1	193721400	193721600	200	239.641	4.34981	0.000249732	0.508444	chip2_peak_4561
chr11	8396400	8396600	200	213.906	4.35031	0.000939278	1	chip1_peak_6371
chr15	63718000	63718200	200	213.931	4.35082	0.000951889	1	chip1_peak_6468
chr15	31805900	31806100	200	213.931	4.35082	0.000965915	1	chip1_peak_6565
chr17	67312300	67312600	300	239.699	4.35088	0.000599888	0.618135	chip2_peak_9386
chr5	113177300	113177500	200	239.705	4.35098	0.000371802	0.566295	chip2_peak_6215
chr12	101954500	101954700	200	213.943	4.35107	0.00032551	1	chip1_peak_2052
chr1	19863500	19863700	200	239.718	4.35122	0.000721905	0.636385	chip2_peak_11040
chr13	69017700	69017900	200	239.718	4.35122	0.000503128	0.599984	chip2_peak_8011
chr7	75616700	75616900	200	213.96	4.35141	0.00096497	1	chip1_peak_6559
chr2	92412500	92412700	200	239.753	4.35186	0.00014324	0.428927	chip2_peak_3048
chr14	67781800	67782000	200	213.994	4.3521	5.30089e-05	1	chip1_peak_400
chr4	147923800	147924000	200	239.793	4.35257	5.36489e-05	0.299335	chip2_peak_1581
chr10	39020700	39020900	200	214.021	4.35264	0.000634001	1	chip1_peak_4138
chr13	43242400	43242600	200	239.848	4.35358	0.000892032	0.652032	chip2_peak_13433
chr1	186034900	186035100	200	239.848	4.35358	0.00092172	0.65458	chip2_peak_13796
chr1	82974100	82974300	200	214.08	4.35385	0.000900392	1	chip1_peak_6050
chr12	14649100	14649300	200	239.865	4.35388	0.000200087	0.478533	chip2_peak_3865
chr6	148615500	148615700	200	239.874	4.35404	0.000690838	0.632282	chip2_peak_10623
chr9	58897600	58897800	200	239.879	4.35413	0.000964096	0.657711	chip2_peak_14406
chr3	9815200	9815400	200	239.879	4.35415	0.00079167	0.644502	chip2_peak_11991
chr6	89277600	89277800	200	239.89	4.35434	4.41281e-05	0.276659	chip2_peak_1392
chr16	95915000	95915400	400	214.119	4.35465	0.00035865	1	chip1_peak_2269
chr2	86029000	86029300	300	214.121	4.35469	6.97794e-05	1	chip1_peak_503
chr16	91914300	91914700	400	214.124	4.35475	0.000158047	1	chip1_peak_1001
chr6	17919900	17920100	200	239.917	4.35482	0.000659386	0.628179	chip2_peak_10192
chr2	48943900	48944100	200	239.97	4.3558	0.000964325	0.657711	chip2_peak_14411
chr7	132642500	132642700	200	239.989	4.35614	0.000657667	0.628032	chip2_peak_10163
chr12	47975000	47975200	200	240.001	4.35636	0.000978064	0.658047	chip2_peak_14608
chr9	32038900	32039100	200	214.209	4.35648	0.000941878	1	chip1_peak_6390
chr11	53726600	53726800	200	214.232	4.35694	0.000948055	1	chip1_peak_6433
chr12	8725000	8725200	200	240.039	4.35704	0.000378362	0.567617	chip2_peak_6304
chr13	97252500	97252700	200	240.07	4.35762	0.000305767	0.537011	chip2_peak_5340
chr11	17126600	17126800	200	240.078	4.35775	0.000885045	0.651913	chip2_peak_13318
chr2	12367700	12367900	200	240.082	4.35783	0.00018591	0.465605	chip2_peak_3674
chr15	10567400	10567600	200	214.308	4.35849	0.00032713	1	chip1_peak_2066
chr10	105595100	105595300	200	240.123	4.35858	0.000887563	0.651913	chip2_peak_13359
chr7	57616800	57617000	200	240.133	4.35874	0.000495333	0.598657	chip2_peak_7913
chr16	81929600	81929800	200	240.135	4.35879	0.000480847	0.593474	chip2_peak_7741
chr3	28799000	28799300	300	214.326	4.35885	0.000601101	1	chip1_peak_3904
chr10	77949900	77950200	300	214.339	4.35913	0.000334813	1	chip1_peak_2112
chrX	74073900	74074100	200	240.181	4.35963	0.000981729	0.658047	chip2_peak_14664
chr11	20449200	20449400	200	240.181	4.35963	0.000981729	0.658047	chip2_peak_14665
chr10	126824500	126824700	200	240.181	4.35963	0.000981729	0.658047	chip2_peak_14666
chr5	12972900	12973100	200	240.181	4.35963	0.000981729	0.658047	chip2_peak_14667
chr5	122495700	122495900	200	214.374	4.35984	6.13328e-05	1	chip1_peak_452
chr1	56659700	56659900	200	240.2	4.35997	0.00088524	0.651913	chip2_peak_13321
chr7	13307700	13307900	200	240.202	4.36	0.000992141	0.659169	chip2_peak_14808
chr4	127738100	127738300	200	240.236	4.36063	0.000756168	0.641155	chip2_peak_11514
chr2	52526300	52526600	300	214.423	4.36083	0.000341586	1	chip1_peak_2157
chr14	55919100	55919300	200	240.26	4.36105	0.000979156	0.658047	chip2_peak_14622
chr7	96293200	96293400	200	240.26	4.36105	0.000979156	0.658047	chip2_peak_14623
chr6	127013100	127013300	200	240.26	4.36105	0.000979156	0.658047	chip2_peak_14624
chr15	88785000	88785300	300	240.294	4.36167	3.24879e-06	0.0690996	chip2_peak_372
chr9	31129500	31130000	500	240.304	4.36185	6.80903e-05	0.332202	chip2_peak_1807
chr13	73670100	73670400	300	240.315	4.36206	0.000505959	0.600109	chip2_peak_8055
chr2	6863700	6864100	400	240.338	4.36247	0.000106633	0.3858	chip2_peak_2498
chr3	110085900	110086100	200	240.338	4.36247	0.00097659	0.658047	chip2_peak_14592
chr17	6026300	6026600	300	214.511	4.36261	6.08165e-05	1	chip1_peak_447
chr11	46232200	46232400	200	214.511	4.36262	0.000938087	1	chip1_peak_6365
chr11	100069100	100069300	200	240.37	4.36305	0.000362596	0.56189	chip2_peak_6104
chr5	140951900	140952100	200	240.385	4.36332	0.000979372	0.658047	chip2_peak_14629
chr10	41834200	41834400	200	214.552	4.36346	0.000892072	1	chip1_peak_5981
chr10	129304500	129304700	200	240.396	4.36353	0.000275781	0.525089	chip2_peak_4907
chr19	26480100	26480300	200	240.416	4.36389	0.000974031	0.65784	chip2_peak_14557
chr3	81029300	81029500	200	240.416	4.36389	0.000974031	0.65784	chip2_peak_14558
chr16	7232700	7233000	300	214.58	4.36401	0.000298611	1	chip1_peak_1871
chr13	108240100	108240400	300	240.425	4.36406	0.000184234	0.46509	chip2_peak_3646
chr1	179633700	179634000	300	240.432	4.36417	7.08505e-05	0.335892	chip2_peak_1868
chr7	28122000	28122200	200	240.435	4.36423	0.000617219	0.622723	chip2_peak_9597
chr14	31384000	31384200	200	214.593	4.36428	0.00019895	1	chip1_peak_1258
chr3	67216200	67216500	300	240.442	4.36436	0.000709693	0.63409	chip2_peak_10889
chr11	76662900	76663200	300	214.61	4.36463	0.000486907	1	chip1_peak_3101
chr16	61461400	61461600	200	240.465	4.36477	0.000595877	0.617577	chip2_peak_9324
chr3	127946900	127947100	200	240.465	4.36477	0.000595877	0.617577	chip2_peak_9325
chr13	103301800	103302000	200	240.475	4.36496	0.000362675	0.56189	chip2_peak_6106
chr1	149683100	149683300	200	240.494	4.36531	0.000971479	0.657711	chip2_peak_14520
chr6	124938000	124938200	200	240.508	4.36556	9.02565e-05	0.362885	chip2_peak_2234
chr2	102871800	102872000	200	214.662	4.36569	0.000932736	1	chip1_peak_6316
chr6	53042300	53042500	200	240.519	4.36575	0.000736596	0.638436	chip2_peak_11246
chr16	5972600	5972900	300	240.528	4.36593	0.000403123	0.573505	chip2_peak_6659
chr5	111686900	111687100	200	214.688	4.36622	0.000932809	1	chip1_peak_6318
chr4	100756600	100756800	200	214.695	4.36636	0.000368467	1	chip1_peak_2331
chr5	60379000	60379200	200	240.563	4.36656	0.000738686	0.638766	chip2_peak_11276
chr16	17423500	17423900	400	214.713	4.36673	8.0027e-05	1	chip1_peak_554
chr9	56579200	56579500	300	214.722	4.36691	0.00033101	1	chip1_peak_2088
chr4	128207800	128208000	200	240.593	4.3671	0.000734673	0.638436	chip2_peak_11211
chr1	183219300	183219500	200	240.619	4.36758	0.000971694	0.657711	chip2_peak_14522
chr16	90646200	90646400	200	240.638	4.36791	0.000736758	0.638436	chip2_peak_11250
chr6	38612500	38612700	200	240.675	4.36859	0.000322126	0.546824	chip2_peak_5538
chr1	131671100	131671300	200	240.679	4.36866	0.000591235	0.617171	chip2_peak_9250
chr5	35118700	35118900	200	214.813	4.36877	0.000934314	1	chip1_peak_6331
chr5	74947700	74947900	200	214.813	4.36877	0.000934314	1	chip1_peak_6332
chr8	119362300	119362500	200	214.813	4.36877	0.000934314	1	chip1_peak_6333
chr6	38794300	38794500	200	214.836	4.36923	0.000366181	1	chip1_peak_2314
chr9	50976000	50976200	200	240.722	4.36945	0.000610814	0.621705	chip2_peak_9512
chr8	25798400	25798600	200	240.751	4.36996	0.000589696	0.61714	chip2_peak_9229
chr11	109864600	109864900	300	214.903	4.37059	0.000261518	1	chip1_peak_1663
chr19	8781000	8781200	200	214.932	4.37119	0.000916398	1	chip1_peak_6177
chr3	99547200	99547400	200	214.932	4.37119	0.000916398	1	chip1_peak_6178
chr5	67668700	67669000	300	240.825	4.37131	3.8862e-05	0.259921	chip2_peak_1298
chr5	28918700	28918900	200	240.848	4.37173	0.0002374	0.50133	chip2_peak_4387
chr6	50296000	50296200	200	240.859	4.37193	0.000634586	0.625263	chip2_peak_9842
chr19	27581900	27582100	200	240.861	4.37196	0.000731004	0.638436	chip2_peak_11155
chr11	20080900	20081100	200	240.897	4.37261	0.000432537	0.583311	chip2_peak_7040
chr1	75764800	75765100	300	240.915	4.37294	0.00053186	0.60535	chip2_peak_8417
chr6	124279700	124280000	300	215.025	4.37307	0.000265902	1	chip1_peak_1691
chr19	8358700	8358900	200	215.026	4.3731	0.000477588	1	chip1_peak_3053
chr15	51182500	51182700	200	240.932	4.37324	0.000632933	0.624864	chip2_peak_9818
chr6	82823400	82823700	300	240.966	4.37386	0.00015238	0.437748	chip2_peak_3173
chr11	70637000	70637200	200	241.004	4.37456	0.000631285	0.624864	chip2_peak_9796
chr3	158047400	158047600	200	241.048	4.37536	0.000760067	0.642318	chip2_peak_11551
chr7	40496300	40496500	200	241.072	4.3758	0.000478112	0.592997	chip2_peak_7703
chr13	20058400	20058600	200	241.076	4.37587	0.00062964	0.624864	chip2_peak_9764
chr2	18170900	18171100	200	241.079	4.37591	0.000648668	0.626682	chip2_peak_10045
chr5	110701700	110702100	400	241.079	4.37592	6.30196e-05	0.323178	chip2_peak_1717
chr7	103636900	103637100	200	241.089	4.3761	0.0001491	0.436408	chip2_peak_3116
chr5	25402200	25402500	300	215.205	4.37673	0.00012694	1	chip1_peak_830
chr6	119558100	119558300	200	215.235	4.37734	0.000912717	1	chip1_peak_6147
chr2	12350100	12350300	200	215.235	4.37734	0.000912717	1	chip1_peak_6148
chr2	118691900	118692100	200	215.235	4.37734	0.000912717	1	chip1_peak_6149
chr5	148484700	148485000	300	215.236	4.37736	0.000213852	1	chip1_peak_1358
chr15	38306300	38306500	200	215.249	4.37764	0.000378113	1	chip1_peak_2395
chr7	117510900	117511200	300	241.192	4.37797	6.96983e-05	0.333582	chip2_peak_1852
chr4	69115700	69115900	200	241.207	4.37825	0.00046173	0.590049	chip2_peak_7460
chr17	87016800	87017000	200	241.221	4.3785	0.000626365	0.623884	chip2_peak_9733
chr19	47350700	47350900	200	215.323	4.37913	0.00098258	1	chip1_peak_6689
chr7	135176200	135176400	200	241.263	4.37927	0.000667016	0.628727	chip2_peak_10300
chr19	40958000	40958200	200	241.294	4.37982	0.000624734	0.623835	chip2_peak_9707
chr9	89912500	89912800	300	241.301	4.37995	7.88269e-05	0.344821	chip2_peak_2034
chr5	42904300	42904500	200	215.366	4.38001	0.000932525	1	chip1_peak_6313
chr18	66298900	66299100	200	241.332	4.38052	0.000359608	0.560808	chip2_peak_6063
chr12	54806600	54806800	200	241.338	4.38062	0.000626504	0.623931	chip2_peak_9735
chr16	14458900	14459100	200	241.347	4.38079	0.000690114	0.632282	chip2_peak_10615
chr13	53770200	53770400	200	241.348	4.38081	0.000473167	0.592894	chip2_peak_7616
chr2	20697100	20697300	200	241.365	4.38111	0.000900971	0.653784	chip2_peak_13526
chr8	40638700	40638900	200	241.41	4.38193	0.000942892	0.656034	chip2_peak_14117
chr14	104537200	104537400	200	241.417	4.38206	0.000471939	0.592894	chip2_peak_7595
chr18	33988400	33988600	200	241.417	4.38206	0.000471939	0.592894	chip2_peak_7596
chr13	89549500	89549700	200	241.46	4.38284	0.000347324	0.556528	chip2_peak_5896
chr19	10723800	10724000	200	215.514	4.38302	0.000903132	1	chip1_peak_6072
chr1	166285800	166286000	200	215.514	4.38302	0.000903132	1	chip1_peak_6073
chr4	140984200	140984400	200	215.562	4.384	0.000349048	1	chip1_peak_2209
chr6	56904600	56904800	200	241.53	4.38411	0.000119647	0.402501	chip2_peak_2702
chr19	38691200	38691400	200	215.614	4.38505	0.000452514	1	chip1_peak_2873
chr6	5186300	5186500	200	241.584	4.38508	0.000421311	0.580785	chip2_peak_6885
chr15	27889600	27889900	300	241.606	4.38549	0.000577493	0.613825	chip2_peak_9082
chr15	100131600	100131800	200	215.649	4.38577	0.000103685	1	chip1_peak_710
chr5	63315200	63315400	200	241.691	4.38704	0.00036653	0.563638	chip2_peak_6156
chr1	91122200	91122400	200	215.715	4.3871	0.000253224	1	chip1_peak_1612
chr13	66896500	66896700	200	215.72	4.38721	0.000401144	1	chip1_peak_2532
chr4	135233300	135233500	200	215.72	4.38721	0.000401144	1	chip1_peak_2533
chr15	13516500	13516700	200	241.714	4.38745	0.000932537	0.654764	chip2_peak_13984
chr13	108161600	108161800	200	215.776	4.38834	0.000348742	1	chip1_peak_2204
chr3	28010800	28011000	200	215.784	4.38851	0.000932784	1	chip1_peak_6317
chr19	16308800	16309000	200	215.793	4.38869	0.000893651	1	chip1_peak_5993
chr9	62909900	62910100	200	241.791	4.38884	0.000619582	0.622954	chip2_peak_9635
chr10	92204100	92204300	200	241.792	4.38886	0.000930097	0.654701	chip2_peak_13944
chr7	80796500	80796700	200	241.792	4.38886	0.000930097	0.654701	chip2_peak_13945
chr5	118366600	118366800	200	241.792	4.38886	0.000930097	0.654701	chip2_peak_13946
chr7	115255000	115255200	200	215.818	4.3892	0.000899509	1	chip1_peak_6035
chr9	96837900	96838100	200	215.818	4.3892	0.000899509	1	chip1_peak_6036
chr8	92225100	92225300	200	215.818	4.3892	0.000899509	1	chip1_peak_6037
chr9	103789600	103789800	200	241.84	4.38974	0.000932746	0.654794	chip2_peak_13988
chr17	5802800	5803100	300	215.847	4.3898	0.000509878	1	chip1_peak_3260
chrX	53270300	53270500	200	241.87	4.39028	0.000927664	0.65458	chip2_peak_13907
chr2	9805900	9806100	200	241.87	4.39028	0.000927664	0.65458	chip2_peak_13908
chr5	140566900	140567100	200	215.896	4.39078	0.000344349	1	chip1_peak_2175
chr18	90508300	90508600	300	215.901	4.39089	0.000908655	1	chip1_peak_6124
chr4	100159900	100160100	200	241.918	4.39116	0.000930306	0.654701	chip2_peak_13951
chr1	100729200	100729400	200	241.918	4.39116	0.000930306	0.654701	chip2_peak_13952
chr15	100514600	100514800	200	241.924	4.39126	7.8061e-05	0.34457	chip2_peak_2020
chr11	106377900	106378100	200	215.93	4.39148	0.000516625	1	chip1_peak_3306
chr5	42417900	42418100	200	241.948	4.3917	0.000925237	0.65458	chip2_peak_13859
chr4	85151800	85152000	200	241.948	4.3917	0.000925237	0.65458	chip2_peak_13860
chr12	69365100	69365300	200	215.962	4.39213	0.000396974	1	chip1_peak_2504
chr1	13014900	13015100	200	241.974	4.39217	0.000699828	0.632506	chip2_peak_10765
chr9	8227200	8227400	200	241.995	4.39256	0.000372902	0.566295	chip2_peak_6232
chr7	80614200	80614500	300	215.986	4.39261	0.000194342	1	chip1_peak_1218
chr11	36549900	36550100	200	242.027	4.39312	0.000922817	0.65458	chip2_peak_13818
chr18	64018500	64018700	200	242.027	4.39312	0.000922817	0.65458	chip2_peak_13819
chr3	51005500	51005700	200	242.027	4.39312	0.000922817	0.65458	chip2_peak_13820
chr7	60899300	60899500	200	216.034	4.39359	0.000791696	1	chip1_peak_5276
chr4	107567600	107567800	200	216.04	4.39372	5.39701e-05	1	chip1_peak_407
chr1	15585200	15585400	200	216.072	4.39437	0.000884273	1	chip1_peak_5918
chr5	45788000	45788200	200	216.097	4.39488	0.000890068	1	chip1_peak_5959
chr13	98596400	98596600	200	242.124	4.39489	0.000563393	0.610954	chip2_peak_8884
chr1	153858400	153858600	200	242.14	4.39517	0.000256711	0.513301	chip2_peak_4658
chr13	81302100	81302300	200	242.153	4.39542	0.000923025	0.65458	chip2_peak_13825
chr9	37013200	37013400	200	242.153	4.39542	0.000923025	0.65458	chip2_peak_13826
chr2	104753200	104753400	200	216.137	4.39568	0.000985112	1	chip1_peak_6708
chr7	39945000	39945200	200	242.177	4.39585	0.000719287	0.636033	chip2_peak_11007
chr11	116072200	116072400	200	242.18	4.39591	4.34968e-05	0.273855	chip2_peak_1385
chr7	128200200	128200400	200	242.196	4.39619	0.000561928	0.610954	chip2_peak_8860
chr9	106358100	106358300	200	242.196	4.39619	0.000561928	0.610954	chip2_peak_8861
chr11	11223600	11223800	200	242.231	4.39684	0.000128191	0.412336	chip2_peak_2823
chr7	105771800	105772000	200	242.279	4.39771	0.000667172	0.628727	chip2_peak_10303
chr14	60368000	60368300	300	216.238	4.39775	0.000611703	1	chip1_peak_3974
chr17	63107400	63107600	200	242.288	4.39786	0.000621186	0.623354	chip2_peak_9650
chr18	35185700	35186000	300	216.261	4.39821	0.00021612	1	chip1_peak_1377
chr6	117280900	117281100	200	216.294	4.39889	0.000292602	1	chip1_peak_1837
chr2	160656600	160656800	200	242.41	4.40008	0.000912797	0.65458	chip2_peak_13656
chr1	169963100	169963300	200	216.367	4.40037	0.000140735	1	chip1_peak_915
chr15	6576900	6577100	200	242.426	4.40037	0.000454372	0.588451	chip2_peak_7360
chr10	76556600	76556800	200	216.371	4.40044	0.000392946	1	chip1_peak_2477
chr8	128408200	128408400	200	216.384	4.40072	0.000564438	1	chip1_peak_3637
chr13	99716800	99717000	200	216.401	4.40107	0.000975018	1	chip1_peak_6634
chr4	6057700	6057900	200	242.469	4.40115	0.000601541	0.618548	chip2_peak_9408
chr9	98232700	98232900	200	242.486	4.40146	0.000998268	0.660034	chip2_peak_14884
chrX	53015500	53015700	200	242.496	4.40165	0.000598281	0.617901	chip2_peak_9359
chr13	80973200	80973400	200	242.496	4.40165	0.000598281	0.617901	chip2_peak_9360
chr11	79406100	79406300	200	242.496	4.40165	0.000598281	0.617901	chip2_peak_9361
chr1	186051800	186052000	200	242.496	4.40165	0.000598281	0.617901	chip2_peak_9362
chr19	46873000	46873200	200	216.45	4.40206	0.000824145	1	chip1_peak_5487
chr18	32230200	32230500	300	216.458	4.40222	0.00040542	1	chip1_peak_2569
chr11	16989300	16989700	400	216.475	4.40256	0.000209422	1	chip1_peak_1330
chr7	138040700	138040900	200	242.564	4.40288	0.00045202	0.587882	chip2_peak_7322
chr9	122263700	122263900	200	242.564	4.40288	0.00045202	0.587882	chip2_peak_7323
chr12	111072800	111073000	200	216.54	4.40387	0.000713327	1	chip1_peak_4680
chr18	67928000	67928200	200	242.619	4.40388	0.00028536	0.529829	chip2_peak_5027
chr2	134546700	134546900	200	216.543	4.40395	0.000875218	1	chip1_peak_5849
chr2	79348700	79348900	200	242.623	4.40395	0.000437677	0.585063	chip2_peak_7106
chr10	120741400	120741600	200	242.633	4.40412	0.000814687	0.646726	chip2_peak_12320
chr10	29297000	29297200	200	242.633	4.40413	0.000450848	0.587797	chip2_peak_7303
chr19	20954300	20954500	200	242.633	4.40413	0.000450848	0.587797	chip2_peak_7304
chr4	109360700	109360900	200	216.602	4.40515	0.000996864	1	chip1_peak_6806
chr18	66399300	66399500	200	242.692	4.4052	0.000436543	0.584866	chip2_peak_7085
chr3	92534200	92534400	200	242.692	4.4052	0.000436543	0.584866	chip2_peak_7087
chr9	18509400	18509600	200	242.71	4.40552	0.000403552	0.573505	chip2_peak_6665
chr3	123343900	123344200	300	242.744	4.40615	4.23446e-05	0.270347	chip2_peak_1367
chr6	29235000	29235200	200	216.684	4.40681	0.000890079	1	chip1_peak_5961
chr2	73057700	73058000	300	242.781	4.40682	0.000210471	0.485669	chip2_peak_4009
chr19	46315600	46315800	200	216.697	4.40707	0.000853963	1	chip1_peak_5699
chr14	57573900	57574100	200	242.829	4.40768	0.00030447	0.536517	chip2_peak_5324
chr19	32015500	32015700	200	242.831	4.40773	0.000593761	0.617261	chip2_peak_9296
chr5	41796300	41796500	200	216.758	4.40831	0.000991182	1	chip1_peak_6757
chr12	41581800	41582000	200	216.785	4.40887	0.000854315	1	chip1_peak_5701
chr10	108835300	108835500	200	242.904	4.40905	0.000592217	0.617171	chip2_peak_9269
chr18	73939400	73939600	200	242.904	4.40905	0.000592217	0.617171	chip2_peak_9270
chr13	100041300	100041500	200	242.913	4.40921	0.000400426	0.572901	chip2_peak_6619
chr11	59038600	59038800	200	242.913	4.40921	0.000400426	0.572901	chip2_peak_6620
chr1	89693400	89693600	200	216.808	4.40934	0.000879316	1	chip1_peak_5876
chr14	108692500	108692700	200	242.927	4.40946	0.000449882	0.587543	chip2_peak_7284
chr11	50672300	50672500	200	216.822	4.40963	0.00086604	1	chip1_peak_5785
chr12	13513400	13513600	200	242.947	4.40984	0.000294087	0.532796	chip2_peak_5168
chr13	18098600	18098800	200	242.949	4.40986	0.000862677	0.651913	chip2_peak_12951
chr7	79872600	79872800	200	242.969	4.41023	0.000124654	0.409308	chip2_peak_2762
chr8	54928100	54928300	200	242.988	4.41057	0.00049195	0.598121	chip2_peak_7861
chr2	132000300	132000500	200	216.916	4.41153	0.000992868	1	chip1_peak_6770
chr7	129761400	129761600	200	216.918	4.41157	0.00083774	1	chip1_peak_5588
chr8	116069500	116069800	300	243.086	4.41235	0.000113323	0.3939	chip2_peak_2609
chr6	22289700	22290100	400	243.116	4.4129	0.000132027	0.417161	chip2_peak_2874
chr16	77000600	77000800	200	243.143	4.41338	0.000740068	0.638827	chip2_peak_11290
chr7	110127600	110127800	200	217.009	4.41343	0.00028544	1	chip1_peak_1800
chr15	11794300	11794500	200	243.159	4.41368	0.000398446	0.572401	chip2_peak_6591
chr5	74947400	74947600	200	217.044	4.41414	0.000980773	1	chip1_peak_6674
chr3	157020200	157020400	200	243.195	4.41433	0.000614505	0.622176	chip2_peak_9557
chr10	126390700	126390900	200	217.071	4.41469	0.00098721	1	chip1_peak_6728
chr11	84252700	84252900	200	217.087	4.41501	0.000473516	1	chip1_peak_3022
chr6	98293600	98293800	200	217.088	4.41503	0.000543691	1	chip1_peak_3505
chr7	77147600	77147800	200	243.246	4.41526	0.000885886	0.651913	chip2_peak_13335
chr9	69027200	69027400	200	243.286	4.41599	0.000213422	0.48688	chip2_peak_4055
chrX	10291500	10291700	200	217.141	4.4161	0.000948671	1	chip1_peak_6439
chr10	82809300	82809500	200	243.324	4.41668	0.000883572	0.651913	chip2_peak_13291
chr7	37110400	37110600	200	243.324	4.41668	0.000883572	0.651913	chip2_peak_13292
chr2	11965400	11965600	200	243.324	4.41668	0.000883572	0.651913	chip2_peak_13293
chr1	91830300	91830500	200	243.325	4.4167	0.000555854	0.610384	chip2_peak_8771
chr2	25642500	25642700	200	243.348	4.41711	0.000212873	0.486524	chip2_peak_4047
chr9	116941800	116942000	200	217.196	4.41722	0.000828963	1	chip1_peak_5530
chr8	47334400	47334600	200	217.198	4.41728	0.000356626	1	chip1_peak_2256
chr3	37748600	37748900	300	243.393	4.41792	0.000221525	0.491606	chip2_peak_4174
chr2	28387200	28387400	200	217.232	4.41795	0.000697026	1	chip1_peak_4546
chr10	79826100	79826300	200	217.236	4.41803	0.000324752	1	chip1_peak_2043
chr18	6166700	6166900	200	243.403	4.4181	0.000881264	0.651913	chip2_peak_13245
chr3	97175600	97175800	200	243.403	4.4181	0.000881264	0.651913	chip2_peak_13246
chr9	113092700	113092900	200	243.403	4.4181	0.000881264	0.651913	chip2_peak_13247
chr13	50471200	50471400	200	217.242	4.41815	0.00032694	1	chip1_peak_2065
chr11	94930500	94930800	300	243.444	4.41885	0.000200816	0.478582	chip2_peak_3879
chr17	35720500	35720700	200	243.453	4.41902	1.69306e-05	0.17862	chip2_peak_799
chr18	7235300	7235500	200	243.455	4.41905	0.000107447	0.386054	chip2_peak_2515
chr1	149844700	149844900	200	243.481	4.41952	0.000878963	0.651913	chip2_peak_13207
chr11	44929600	44929800	200	243.53	4.42042	0.000881466	0.651913	chip2_peak_13257
chr14	46972000	46972200	200	217.369	4.42075	0.000841984	1	chip1_peak_5620
chr1	180876800	180877000	200	217.369	4.42075	0.000841984	1	chip1_peak_5621
chr13	26744800	26745000	200	243.567	4.42108	0.000685215	0.631413	chip2_peak_10550
chr4	58577000	58577200	200	217.396	4.4213	0.000847499	1	chip1_peak_5659
chr9	107921500	107921700	200	217.396	4.4213	0.000888167	1	chip1_peak_5948
chr8	79052000	79052200	200	217.398	4.42133	0.000423434	1	chip1_peak_2704
chr14	24272200	24272500	300	217.399	4.42135	0.000628799	1	chip1_peak_4100
chr6	145735300	145735500	200	243.627	4.42217	0.000784013	0.643976	chip2_peak_11867
chr4	123574900	123575100	200	243.642	4.42245	0.000591814	0.617171	chip2_peak_9259
chr3	122173300	122173500	200	217.455	4.4225	0.000321469	1	chip1_peak_2020
chr16	5828500	5828700	200	243.659	4.42275	0.00014305	0.428886	chip2_peak_3044
chr1	139804800	139805100	300	217.469	4.42277	0.000459687	1	chip1_peak_2925
chr7	24568500	24568700	200	243.66	4.42278	0.000752766	0.640016	chip2_peak_11480
chr4	118392200	118392400	200	217.472	4.42284	0.00038694	1	chip1_peak_2435
chr14	86827400	86827600	200	217.501	4.42343	0.000825653	1	chip1_peak_5500
chr10	118881200	118881400	200	243.699	4.42348	0.00057298	0.611939	chip2_peak_9035
chr4	95382200	95382400	200	243.74	4.42423	0.000871704	0.651913	chip2_peak_13086
chr1	178467600	178467800	200	243.78	4.42494	0.000431843	0.583311	chip2_peak_7027
chr10	102825200	102825400	200	243.78	4.42495	0.000779931	0.643976	chip2_peak_11799
chr12	29358600	29358800	200	217.596	4.42536	0.000772018	1	chip1_peak_5105
chr14	20076900	20077100	200	243.818	4.42563	0.000809674	0.646243	chip2_peak_12245
chr18	64746600	64746800	200	217.633	4.4261	0.000959744	1	chip1_peak_6527
chr7	49758500	49758700	200	243.844	4.42611	0.000570008	0.611324	chip2_peak_8992
chr6	126472000	126472200	200	243.844	4.42611	0.000570008	0.611324	chip2_peak_8993
chr15	32590700	32591100	400	243.853	4.42627	3.80063e-05	0.257699	chip2_peak_1282
chr10	75626000	75626300	300	243.86	4.42641	0.000175739	0.457371	chip2_peak_3528
chr9	100636500	100636700	200	243.861	4.42642	0.000587214	0.616533	chip2_peak_9197
chr14	114007000	114007200	200	217.661	4.42668	0.000966042	1	chip1_peak_6567
chr3	127759900	127760100	200	217.661	4.42668	0.000966042	1	chip1_peak_6568
chr11	110041200	110041400	200	217.676	4.42698	0.000838622	1	chip1_peak_5597
chr19	47060900	47061100	200	217.676	4.42698	0.000838622	1	chip1_peak_5598
chr12	32916700	32916900	200	243.916	4.42743	0.000568528	0.611314	chip2_peak_8964
chr11	5144700	5144900	200	243.916	4.42743	0.000568528	0.611314	chip2_peak_8965
chr17	76434500	76434700	200	243.916	4.42743	0.000568528	0.611314	chip2_peak_8966
chr2	120936300	120936500	200	243.918	4.42745	0.00042961	0.583172	chip2_peak_6992
chr12	70470000	70470200	200	217.716	4.4278	0.000884376	1	chip1_peak_5920
chr7	88347400	88347600	200	243.982	4.42862	0.000778076	0.643976	chip2_peak_11777
chr3	106133100	106133300	200	243.989	4.42874	0.000567052	0.611314	chip2_peak_8940
chr2	128468800	128469000	200	217.816	4.42984	0.000960542	1	chip1_peak_6531
chr1	164006700	164006900	200	244.059	4.43001	0.000776049	0.643976	chip2_peak_11744
chr1	66712500	66712700	200	244.061	4.43005	0.00056558	0.610957	chip2_peak_8921
chr8	112502000	112502300	300	217.844	4.43041	0.000305314	1	chip1_peak_1905
chr11	3525900	3526100	200	244.089	4.43055	0.000156346	0.440559	chip2_peak_3244
chr17	46698400	46698600	200	244.099	4.43075	4.18154e-05	0.268839	chip2_peak_1354
chr9	42934800	42935000	200	244.134	4.43137	0.000570544	0.611324	chip2_peak_9003
chr7	45296700	45296900	200	244.173	4.43209	7.68708e-05	0.343319	chip2_peak_1994
chr16	24817200	24817500	300	217.934	4.43224	0.000260112	1	chip1_peak_1650
chr7	137817100	137817300	200	217.948	4.43251	0.000955907	1	chip1_peak_6493
chr8	35004400	35004600	200	217.948	4.43251	0.000955907	1	chip1_peak_6494
chr16	24426800	24427000	200	217.959	4.43273	0.000364242	1	chip1_peak_2303
chr5	96619000	96619300	300	217.961	4.43278	0.000335236	1	chip1_peak_2115
chr16	96384700	96384900	200	218.017	4.43392	0.000914111	1	chip1_peak_6161
chr11	88612600	88612800	200	244.292	4.43424	0.000609822	0.621113	chip2_peak_9505
chr10	93095700	93095900	200	244.31	4.43456	0.000159574	0.442487	chip2_peak_3301
chr18	42537200	42537400	200	244.311	4.43458	0.00037962	0.567779	chip2_peak_6323
chrX	13350000	13350200	200	218.065	4.43491	0.000813962	1	chip1_peak_5420
chr14	66795300	66795500	200	244.33	4.43494	0.000644272	0.626297	chip2_peak_9981
chr12	79446100	79446400	300	218.074	4.43508	0.000260438	1	chip1_peak_1653
chr9	111248400	111248600	200	218.093	4.43548	0.000819292	1	chip1_peak_5457
chr17	34045800	34046000	200	244.37	4.43566	0.00076965	0.643615	chip2_peak_11666
chr14	57982100	57982400	300	244.371	4.43568	7.71934e-05	0.343746	chip2_peak_2002
chr1	7175900	7176200	300	218.142	4.43646	9.05068e-05	1	chip1_peak_634
chr8	125883500	125883700	200	244.446	4.43704	0.000377661	0.567493	chip2_peak_6296
chr8	4305300	4305500	200	244.471	4.4375	0.000363384	0.56197	chip2_peak_6118
chr5	148974900	148975200	300	218.22	4.43806	0.000227247	1	chip1_peak_1457
chr17	45991800	45992000	200	218.225	4.43816	0.000883375	1	chip1_peak_5912
chr2	124130200	124130400	200	244.512	4.43824	0.000277481	0.525612	chip2_peak_4933
chr14	11752300	11752600	300	244.568	4.43926	0.000289219	0.531461	chip2_peak_5089
chr5	25472000	25472200	200	218.372	4.44115	0.000810718	1	chip1_peak_5405
chr14	59738400	59738600	200	218.401	4.44173	0.000816026	1	chip1_peak_5435
chr12	107854700	107854900	200	244.735	4.44228	0.000404168	0.573783	chip2_peak_6672
chr11	51287700	51287900	200	218.435	4.44243	0.000943199	1	chip1_peak_6403
chr19	32190900	32191100	200	218.445	4.44263	0.000468945	1	chip1_peak_2992
chr4	135199400	135199600	200	244.759	4.44272	0.000140445	0.426765	chip2_peak_2999
chr19	6087300	6087500	200	218.45	4.44273	0.000903811	1	chip1_peak_6077
chr4	127525600	127525800	200	244.779	4.44308	0.000841642	0.649182	chip2_peak_12686
chr9	58201400	58201600	200	244.815	4.44373	0.000145031	0.430411	chip2_peak_3075
chr13	71114300	71114600	300	244.868	4.4447	0.000135431	0.421757	chip2_peak_2917
chr3	9326600	9326900	300	244.892	4.44513	0.000687063	0.631661	chip2_peak_10576
chr8	80854500	80854800	300	244.898	4.44525	0.000659242	0.628179	chip2_peak_10188
chr6	48071400	48071600	200	244.951	4.44621	0.000611723	0.621856	chip2_peak_9520
chr9	3179900	3180100	200	244.986	4.44683	0.000839643	0.648953	chip2_peak_12670
chr15	3551000	3551200	200	218.688	4.44756	0.000828119	1	chip1_peak_5525
chr11	33747500	33747700	200	218.692	4.44766	0.000930112	1	chip1_peak_6295
chr14	64038900	64039100	200	245.047	4.44794	0.000718932	0.635996	chip2_peak_11002
chr3	104305900	104306100	200	218.71	4.44802	0.000483632	1	chip1_peak_3080
chr17	15831200	15831400	200	245.08	4.44855	0.000843238	0.649182	chip2_peak_12714
chr11	96153200	96153400	200	245.119	4.44926	0.000544522	0.60739	chip2_peak_8613
chr1	58503800	58504000	200	245.119	4.44926	0.000544522	0.60739	chip2_peak_8614
chr1	71257900	71258100	200	245.119	4.44926	0.000544522	0.60739	chip2_peak_8615
chr8	42211100	42211300	200	245.128	4.44943	0.000744927	0.639095	chip2_peak_11371
chr13	9722500	9722700	200	245.133	4.44951	0.000442309	0.586253	chip2_peak_7172
chr6	81164900	81165100	200	245.142	4.44967	0.000835271	0.648364	chip2_peak_12616
chr16	71040000	71040200	200	245.143	4.44969	0.000560949	0.610954	chip2_peak_8846
chr6	8378400	8378600	200	245.143	4.44969	0.000560949	0.610954	chip2_peak_8847
chr5	17776900	17777100	200	245.143	4.44969	0.000560949	0.610954	chip2_peak_8848
chr11	83790400	83790600	200	218.808	4.45001	0.000303036	1	chip1_peak_1893
chr5	119955000	119955200	200	245.205	4.45082	0.000742988	0.639	chip2_peak_11343
chr8	41190500	41190700	200	218.854	4.45095	0.000664521	1	chip1_peak_4330
chr10	71155600	71155800	200	245.255	4.45172	0.000745101	0.639163	chip2_peak_11373
chr19	41260200	41260400	200	245.264	4.45189	0.000541701	0.607022	chip2_peak_8572
chr8	122623700	122623900	200	218.911	4.4521	0.000440303	1	chip1_peak_2792
chr13	24236600	24236800	200	245.282	4.45221	0.000741054	0.638827	chip2_peak_11313
chr2	130729500	130729700	200	245.282	4.45221	0.000741054	0.638827	chip2_peak_11314
chr2	166973600	166973800	200	218.917	4.45222	0.000317095	1	chip1_peak_1993
chr1	72760800	72761000	200	245.288	4.45233	0.000558043	0.610822	chip2_peak_8804
chr13	29933500	29933800	300	245.302	4.45257	0.000403358	0.573505	chip2_peak_6663
chr4	104728900	104729100	200	218.96	4.45309	0.000799044	1	chip1_peak_5326
chr18	65522400	65522700	300	245.336	4.4532	0.000513508	0.601126	chip2_peak_8171
chr15	42959600	42959800	200	245.336	4.4532	0.000540297	0.606545	chip2_peak_8559
chr14	62953400	62953600	200	245.336	4.4532	0.000540297	0.606545	chip2_peak_8560
chr19	37998400	37998600	200	218.966	4.45322	0.00058911	1	chip1_peak_3821
chrX	136183100	136183500	400	245.343	4.45332	7.49034e-05	0.340671	chip2_peak_1954
chr9	54549400	54549600	200	245.349	4.45343	0.000529174	0.60498	chip2_peak_8378
chr14	67877900	67878100	200	218.979	4.45349	0.000920367	1	chip1_peak_6210
chr4	108904700	108904900	200	218.979	4.45349	0.000920367	1	chip1_peak_6211
chr2	122345700	122345900	200	245.358	4.4536	0.000739126	0.638827	chip2_peak_11280
chr11	50330700	50330900	200	245.434	4.45498	0.000575018	0.612626	chip2_peak_9059
chr9	56436000	56436300	300	219.066	4.45526	0.000351148	1	chip1_peak_2221
chr6	118773100	118773300	200	219.078	4.45549	0.000303876	1	chip1_peak_1898
chr11	86398700	86398900	200	219.14	4.45677	0.000257558	1	chip1_peak_1634
chr5	20764700	20764900	200	245.562	4.45729	0.000737375	0.638483	chip2_peak_11259
chr3	159263300	159263500	200	245.562	4.45729	0.000737375	0.638483	chip2_peak_11260
chr7	43584800	43585000	200	245.563	4.45732	8.29265e-05	0.350434	chip2_peak_2110
chr9	77597300	77597500	200	245.577	4.45757	0.000323193	0.547727	chip2_peak_5551
chr16	5312900	5313100	200	219.185	4.45767	0.000262802	1	chip1_peak_1671
chr10	96202800	96203300	500	245.621	4.45836	1.0439e-06	0.035573	chip2_peak_234
chr5	100847900	100848100	200	245.625	4.45843	0.000739903	0.638827	chip2_peak_11288
chr8	117238900	117239100	200	219.266	4.45933	0.000910727	1	chip1_peak_6137
chr8	10027200	10027400	200	245.711	4.46001	0.000613836	0.622103	chip2_peak_9549
chr11	80852200	80852400	200	245.714	4.46005	0.000264488	0.519255	chip2_peak_4749
chr12	71853100	71853400	300	219.307	4.46016	0.000417586	1	chip1_peak_2663
chr5	131593000	131593200	200	245.76	4.46089	0.000649912	0.626722	chip2_peak_10065
chr15	79018100	79018300	200	245.786	4.46135	0.000612243	0.621921	chip2_peak_9526
chr17	84097700	84097900	200	245.791	4.46145	8.65872e-05	0.356464	chip2_peak_2176
chr4	8789300	8789600	300	219.372	4.46149	0.000164917	1	chip1_peak_1039
chr17	62775200	62775400	200	245.811	4.46181	6.67823e-05	0.331137	chip2_peak_1782
chr8	111307700	111307900	200	245.815	4.46188	0.000462642	0.59009	chip2_peak_7479
chr3	115750800	115751000	200	219.396	4.46197	0.000893051	1	chip1_peak_5987
chr7	132080700	132080900	200	219.406	4.46218	0.00089914	1	chip1_peak_6033
chr1	175596900	175597200	300	245.835	4.46225	1.53177e-05	0.171142	chip2_peak_748
chr11	40600900	40601100	200	245.883	4.46312	0.000811174	0.646319	chip2_peak_12274
chr2	69020400	69020600	200	245.9	4.46342	0.000220049	0.491396	chip2_peak_4149
chr7	130965100	130965400	300	245.902	4.46346	0.000285252	0.529829	chip2_peak_5026
chr14	27628300	27628600	300	245.93	4.46397	0.000436995	0.585047	chip2_peak_7090
chr2	39406800	39407000	200	245.949	4.46433	0.000242091	0.504004	chip2_peak_4453
chr1	88451000	88451200	200	245.961	4.46454	0.000809062	0.646243	chip2_peak_12229
chr9	62192800	62193000	200	245.963	4.46458	5.74706e-05	0.308534	chip2_peak_1640
chr16	32882800	32883000	200	245.979	4.46487	0.000129737	0.41347	chip2_peak_2846
chr19	21514200	21514400	200	246.013	4.46548	0.000811366	0.64632	chip2_peak_12278
chr12	17344100	17344300	200	219.584	4.46579	0.000905103	1	chip1_peak_6084
chr1	109247700	109248000	300	246.035	4.46588	4.18275e-05	0.268839	chip2_peak_1355
chr10	18922800	18923000	200	219.591	4.46593	0.000535542	1	chip1_peak_3438
chr7	40242100	40242300	200	246.051	4.46618	0.000143583	0.4292	chip2_peak_3054
chr11	79119400	79119600	200	219.623	4.46659	0.000588524	1	chip1_peak_3811
chr15	10251400	10251600	200	219.685	4.46784	0.000777549	1	chip1_peak_5147
chr5	35186800	35187000	200	219.685	4.46784	0.000777549	1	chip1_peak_5148
chrX	129599700	129599900	200	246.148	4.46793	0.000175791	0.457371	chip2_peak_3532
chr7	101087900	101088200	300	246.154	4.46805	0.000271982	0.52388	chip2_peak_4846
chr18	78111100	78111300	200	219.702	4.4682	0.000981159	1	chip1_peak_6678
chr15	88726300	88726600	300	246.217	4.46918	0.000222547	0.491951	chip2_peak_4191
chr2	49323500	49323800	300	219.778	4.46974	0.000496211	1	chip1_peak_3165
chr18	9822400	9822600	200	219.849	4.47118	0.00043923	1	chip1_peak_2784
chr2	29572900	29573100	200	246.336	4.47134	0.00052368	0.603429	chip2_peak_8300
chr17	33770000	33770200	200	219.877	4.47174	0.000442086	1	chip1_peak_2803
chr6	134390000	134390200	200	246.39	4.47232	0.000256295	0.512846	chip2_peak_4655
chr8	83283400	83283600	200	219.949	4.47321	0.000850894	1	chip1_peak_5676
chr8	19236700	19236900	200	246.467	4.47372	0.00051886	0.602542	chip2_peak_8233
chr4	68067700	68067900	200	246.477	4.4739	0.000711542	0.634214	chip2_peak_10911
chr15	97495300	97495500	200	219.984	4.47393	0.00087396	1	chip1_peak_5840
chr9	51381100	51381300	200	220.012	4.47449	0.00073949	1	chip1_peak_4867
chr11	100053900	100054100	200	246.553	4.47529	0.000709693	0.63409	chip2_peak_10888
chr2	168962000	168962200	200	246.63	4.47668	0.000707849	0.633695	chip2_peak_10867
chr16	8468800	8469000	200	220.123	4.47675	0.000463447	1	chip1_peak_2949
chr6	106107400	106107600	200	246.643	4.47692	0.00053174	0.605315	chip2_peak_8415
chr16	11213400	11213700	300	246.684	4.47765	0.000375287	0.566396	chip2_peak_6271
chr17	84322400	84322600	200	246.716	4.47824	0.000630052	0.624864	chip2_peak_9769
chr8	75267000	75267200	200	220.22	4.47873	0.000998324	1	chip1_peak_6814
chr1	106737500	106737800	300	246.745	4.47877	0.000769207	0.643615	chip2_peak_11654
chr1	75670600	75670800	200	220.228	4.47888	0.000873171	1	chip1_peak_5834
chr13	24587700	24587900	200	220.233	4.47899	0.000377949	1	chip1_peak_2394
chr11	79780300	79780500	200	220.233	4.47899	0.000907392	1	chip1_peak_6112
chr6	107280700	107280900	200	246.758	4.479	0.000708017	0.633695	chip2_peak_10869
chr11	116160400	116160600	200	246.782	4.47943	4.11081e-05	0.267732	chip2_peak_1334
chr10	69655900	69656100	200	246.783	4.47946	0.000704175	0.633199	chip2_peak_10825
chr7	100414100	100414300	200	246.786	4.47952	0.000972141	0.657783	chip2_peak_14532
chr4	39179200	39179400	200	246.786	4.47952	0.000972141	0.657783	chip2_peak_14533
chr13	21184300	21184500	200	220.281	4.47997	0.000907216	1	chip1_peak_6110
chr6	147581600	147581800	200	246.812	4.47998	0.000346683	0.556528	chip2_peak_5884
chr11	72457600	72457800	200	246.812	4.47998	0.000299999	0.534741	chip2_peak_5262
chr16	92453800	92454000	200	246.829	4.48029	0.000899098	0.653544	chip2_peak_13502
chr11	55322800	55323000	200	246.829	4.48029	0.000512179	0.600571	chip2_peak_8157
chr2	96450800	96451000	200	246.846	4.48059	0.000959396	0.657711	chip2_peak_14336
chr3	155362100	155362300	200	246.86	4.48085	0.000702345	0.633103	chip2_peak_10797
chr2	38722900	38723200	300	220.325	4.48085	0.000945072	1	chip1_peak_6419
chr9	51317200	51317400	200	246.867	4.48099	0.000969604	0.657711	chip2_peak_14491
chr14	45606900	45607100	200	220.347	4.48132	0.000746845	1	chip1_peak_4919
chr2	132605700	132605900	200	220.351	4.4814	0.000741378	1	chip1_peak_4882
chr18	35156400	35156700	300	246.89	4.4814	0.00040958	0.575728	chip2_peak_6745
chr11	113561300	113561800	500	246.891	4.48142	0.000379974	0.567848	chip2_peak_6330
chr7	30224000	30224200	200	220.365	4.48168	0.000842527	1	chip1_peak_5628
chr3	108790600	108790800	200	246.911	4.48178	0.000704343	0.633199	chip2_peak_10826
chr1	6278200	6278400	200	246.911	4.48178	0.000704343	0.633199	chip2_peak_10827
chr1	68102600	68103000	400	246.918	4.48191	9.94455e-05	0.377565	chip2_peak_2378
chr5	17007100	17007300	200	246.949	4.48247	0.000967075	0.657711	chip2_peak_14442
chr13	40852800	40853000	200	220.43	4.48299	0.000635969	1	chip1_peak_4148
chr16	78338900	78339100	200	220.441	4.48321	0.000956965	1	chip1_peak_6506
chr1	183335700	183336000	300	247.019	4.48374	0.000551289	0.609269	chip2_peak_8705
chr1	169242700	169243000	300	247.027	4.48389	0.000265631	0.519631	chip2_peak_4769
chr4	145051500	145051700	200	220.495	4.48431	0.000247843	1	chip1_peak_1578
chr15	28643100	28643400	300	247.064	4.48456	0.000576843	0.613469	chip2_peak_9075
chr15	11815800	11816000	200	247.111	4.48542	0.000962036	0.657711	chip2_peak_14373
chr4	46059700	46059900	200	247.159	4.48628	0.000168463	0.450142	chip2_peak_3433
chr13	42651100	42651300	200	220.6	4.48646	0.000867258	1	chip1_peak_5796
chr7	98910500	98910700	200	220.6	4.48646	0.000867258	1	chip1_peak_5797
chr6	125696900	125697100	200	220.6	4.48646	0.000867258	1	chip1_peak_5798
chr8	49696500	49696700	200	247.171	4.4865	0.000100071	0.378312	chip2_peak_2390
chr4	23496500	23496700	200	247.181	4.48668	0.000776821	0.643976	chip2_peak_11752
chr13	111753900	111754100	200	220.63	4.48706	0.000978561	1	chip1_peak_6663
chr1	181853200	181853400	200	247.21	4.48721	0.000136554	0.422994	chip2_peak_2932
chr13	40970500	40970700	200	220.641	4.48729	0.000738632	1	chip1_peak_4859
chr7	97405800	97406000	200	220.641	4.48729	0.000738632	1	chip1_peak_4860
chr15	26473600	26473800	200	247.217	4.48733	0.00058502	0.616298	chip2_peak_9161
chr8	85883100	85883400	300	247.307	4.48897	0.000136604	0.422994	chip2_peak_2935
chr2	76672100	76672300	200	247.318	4.48917	0.000113007	0.393335	chip2_peak_2605
chr6	83393500	83393800	300	220.76	4.48971	0.000466954	1	chip1_peak_2974
chr16	87397900	87398100	200	220.798	4.49047	0.000265839	1	chip1_peak_1690
chr9	88242900	88243100	200	220.798	4.49047	0.000266817	1	chip1_peak_1698
chr15	95945000	95945200	200	247.394	4.49055	2.99481e-05	0.230501	chip2_peak_1115
chr1	91121800	91122100	300	220.812	4.49077	0.000606533	1	chip1_peak_3944
chr14	71243100	71243300	200	247.408	4.4908	0.000179694	0.460709	chip2_peak_3588
chr8	61631700	61631900	200	247.416	4.49094	0.000770777	0.643974	chip2_peak_11675
chr5	100199600	100199800	200	247.454	4.49163	0.00051662	0.601926	chip2_peak_8210
chr3	33315300	33315500	200	247.471	4.49194	0.000274206	0.524803	chip2_peak_4882
chr9	65936800	65937000	200	220.876	4.49206	0.000389375	1	chip1_peak_2456
chr12	57186100	57186300	200	247.532	4.49305	0.000375211	0.566396	chip2_peak_6269
chr11	62565800	62566000	200	247.549	4.49336	0.000149476	0.436803	chip2_peak_3121
chr16	44348200	44348400	200	220.944	4.49346	0.000659763	1	chip1_peak_4299
chr8	61032500	61032700	200	220.969	4.49395	0.000740943	1	chip1_peak_4878
chr12	31392100	31392300	200	220.984	4.49426	0.000740522	1	chip1_peak_4875
chr10	39620400	39620600	200	220.984	4.49426	0.000740522	1	chip1_peak_4876
chr6	67294200	67294400	200	247.613	4.49453	0.000151906	0.437748	chip2_peak_3164
chr15	71980500	71980700	200	221.013	4.49485	0.000841554	1	chip1_peak_5617
chr16	37903200	37903400	200	247.655	4.49529	0.000243691	0.505125	chip2_peak_4475
chr2	109131400	109131700	300	247.717	4.4964	0.000395854	0.571518	chip2_peak_6553
chr10	56106100	56106400	300	247.726	4.49657	7.04089e-05	0.33556	chip2_peak_1861
chr4	32416300	32416600	300	247.742	4.49687	0.000702513	0.633103	chip2_peak_10798
chr12	91789400	91789600	200	247.757	4.49713	0.000944018	0.656297	chip2_peak_14125
chr10	89327400	89327700	300	247.815	4.49819	5.27054e-05	0.297477	chip2_peak_1561
chr15	10584800	10585000	200	221.241	4.4995	0.000274287	1	chip1_peak_1743
chr16	86877400	86877600	200	221.256	4.49979	0.000978284	1	chip1_peak_6660
chr7	141159500	141159700	200	221.263	4.49994	0.0007328	1	chip1_peak_4819
chr6	125534500	125534700	200	221.263	4.49994	0.0007328	1	chip1_peak_4820
chr5	134399200	134399400	200	247.914	4.49998	0.000289882	0.531461	chip2_peak_5099
chr7	57422200	57422400	200	221.269	4.50006	0.000276063	1	chip1_peak_1759
chr1	172146900	172147100	200	247.96	4.50082	0.000753034	0.640029	chip2_peak_11486
chr10	125294000	125294200	200	247.998	4.50151	0.000506713	0.600186	chip2_peak_8066
chr1	72735000	72735300	300	248.029	4.50208	3.98869e-05	0.263968	chip2_peak_1311
chr8	3176900	3177200	300	221.428	4.50329	0.000370772	1	chip1_peak_2347
chr2	101964000	101964200	200	248.121	4.50374	0.000451155	0.587844	chip2_peak_7309
chr4	13768200	13768400	200	248.132	4.50394	0.000672673	0.629228	chip2_peak_10391
chr8	47200500	47200800	300	248.138	4.50404	0.000309675	0.539232	chip2_peak_5393
chr7	66131100	66131300	200	248.138	4.50405	0.000380187	0.56789	chip2_peak_6332
chr9	122809000	122809200	200	221.478	4.50431	0.000692633	1	chip1_peak_4525
chr7	12480800	12481000	200	248.162	4.50449	0.000925831	0.65458	chip2_peak_13867
chr13	34150400	34150600	200	248.208	4.50533	0.000670928	0.62898	chip2_peak_10365
chr8	48777200	48777400	200	221.543	4.50563	0.000725161	1	chip1_peak_4757
chr7	74457100	74457300	200	248.235	4.50581	0.000815691	0.646726	chip2_peak_12335
chr4	136959700	136959900	200	248.244	4.50597	0.000923419	0.65458	chip2_peak_13832
chr15	57662600	57662800	200	221.598	4.50675	0.000829682	1	chip1_peak_5535
chr9	87962300	87962500	200	248.298	4.50696	0.000265457	0.519631	chip2_peak_4766
chr4	4333100	4333300	200	248.315	4.50726	0.000231531	0.498153	chip2_peak_4313
chr3	41476700	41476900	200	221.632	4.50744	0.000835119	1	chip1_peak_5571
chr8	30252700	30252900	200	221.632	4.50744	0.000835119	1	chip1_peak_5572
chr6	134381900	134382100	200	248.325	4.50744	0.000133951	0.419744	chip2_peak_2897
chr12	70875900	70876100	200	248.325	4.50744	0.000921014	0.65458	chip2_peak_13781
chr14	54197700	54197900	200	248.337	4.50767	0.000671091	0.62898	chip2_peak_10367
chr2	72764100	72764300	200	221.69	4.50862	0.000802387	1	chip1_peak_5349
chr1	106663100	106663300	200	221.69	4.50862	0.000852836	1	chip1_peak_5691
chr6	109300900	109301100	200	248.414	4.50906	0.00066935	0.628727	chip2_peak_10337
chr2	113776500	113776700	200	248.414	4.50906	0.00066935	0.628727	chip2_peak_10338
chr8	104043100	104043400	300	248.414	4.50907	0.000525078	0.604058	chip2_peak_8315
chr5	121292600	121292800	200	248.424	4.50925	0.000767167	0.64339	chip2_peak_11629
chr5	89020500	89020700	200	221.726	4.50936	0.000962003	1	chip1_peak_6542
chr10	88467400	88467600	200	248.462	4.50993	0.000921238	0.65458	chip2_peak_13788
chr13	97993600	97993800	200	248.487	4.51039	0.000916223	0.65458	chip2_peak_13707
chr11	93578100	93578300	200	248.495	4.51054	0.000263417	0.517972	chip2_peak_4740
chr3	99352400	99352700	300	248.529	4.51115	0.000594954	0.617552	chip2_peak_9311
chr3	98329700	98330100	400	221.841	4.51169	2.76146e-05	0.977685	chip1_peak_251
chr19	24301700	24301900	200	248.569	4.51188	0.000349898	0.556847	chip2_peak_5944
chr6	27648100	27648300	200	248.58	4.51208	0.00013272	0.417995	chip2_peak_2880
chr10	107277500	107277700	200	221.865	4.51219	0.000352893	1	chip1_peak_2234
chr5	29222800	29223000	200	248.59	4.51226	0.000946748	0.656668	chip2_peak_14160
chr11	102891900	102892100	200	221.885	4.51258	0.000821022	1	chip1_peak_5468
chr4	108640400	108640700	300	248.608	4.51259	0.000288482	0.530927	chip2_peak_5073
chr12	98457900	98458100	200	248.625	4.51288	0.000916447	0.65458	chip2_peak_13712
chr4	6808900	6809100	200	248.625	4.51288	0.000916447	0.65458	chip2_peak_13713
chr11	23144500	23144700	200	221.919	4.51328	0.000826401	1	chip1_peak_5507
chr8	126463100	126463300	200	221.919	4.51328	0.000826401	1	chip1_peak_5508
chr12	77948900	77949100	200	221.921	4.51333	0.000703906	1	chip1_peak_4600
chr8	26474900	26475100	200	248.654	4.51342	0.00061214	0.621921	chip2_peak_9525
chr7	65311000	65311200	200	248.673	4.51377	0.000556024	0.610384	chip2_peak_8773
chr2	152590300	152590500	200	221.964	4.51419	9.98572e-05	1	chip1_peak_690
chr11	87070400	87070600	200	248.706	4.51436	0.000914061	0.65458	chip2_peak_13674
chr5	78824100	78824300	200	248.706	4.51436	0.000914061	0.65458	chip2_peak_13675
chr3	130827900	130828100	200	248.713	4.5145	0.000738189	0.638649	chip2_peak_11268
chr3	138996500	138996700	200	248.713	4.5145	0.000738189	0.638649	chip2_peak_11269
chr12	17037100	17037300	200	222.021	4.51535	0.000951943	1	chip1_peak_6470
chr7	45160800	45161000	200	248.765	4.51543	0.000240497	0.502815	chip2_peak_4434
chr19	56018400	56018600	200	222.041	4.51577	0.000810389	1	chip1_peak_5401
chr2	117569700	117569900	200	222.065	4.51626	0.000582973	1	chip1_peak_3755
chr12	4988800	4989100	300	248.813	4.51631	0.000367426	0.563998	chip2_peak_6169
chr13	34418400	34418600	200	248.822	4.51647	0.000553151	0.609845	chip2_peak_8731
chr11	91363500	91363700	200	248.846	4.5169	0.000738369	0.638716	chip2_peak_11271
chr13	104027600	104027800	200	248.87	4.51734	0.000734361	0.638436	chip2_peak_11206
chr3	31124500	31124700	200	222.126	4.5175	0.000786389	1	chip1_peak_5226
chr3	42943900	42944100	200	248.897	4.51783	0.000981275	0.658047	chip2_peak_14657
chr3	144117500	144117700	200	248.897	4.51783	0.000981275	0.658047	chip2_peak_14658
chr8	63237700	63237900	200	248.91	4.51807	0.000475462	0.592903	chip2_peak_7657
chr14	79501600	79501800	200	222.21	4.51919	0.000305814	1	chip1_peak_1909
chr13	77061900	77062200	300	248.998	4.51966	0.000152784	0.437748	chip2_peak_3186
chr18	76033600	76033800	200	222.234	4.51968	0.00070113	1	chip1_peak_4574
chr6	7125900	7126100	200	222.234	4.51968	0.00070113	1	chip1_peak_4575
chr18	20757500	20757900	400	249.001	4.51971	0.00012085	0.404097	chip2_peak_2718
chr8	38812900	38813100	200	249.049	4.52059	0.000644675	0.626459	chip2_peak_9985
chr2	181177000	181177200	200	249.062	4.52083	0.000976168	0.658047	chip2_peak_14584
chr3	71568100	71568300	200	249.08	4.52116	0.000732634	0.638436	chip2_peak_11180
chr14	12677600	12677800	200	222.313	4.5213	0.000754792	1	chip1_peak_4980
chr2	119663800	119664100	300	249.16	4.5226	0.000664476	0.628686	chip2_peak_10263
chr10	95442700	95442900	200	222.385	4.52275	0.000911186	1	chip1_peak_6138
chr11	67059500	67059700	200	249.19	4.52315	0.000651978	0.627124	chip2_peak_10094
chr4	152472700	152472900	200	249.267	4.52455	0.000703782	0.633103	chip2_peak_10820
chr9	77230200	77230400	200	222.494	4.52497	0.000740321	1	chip1_peak_4873
chr3	108712700	108713000	300	249.327	4.52563	0.000291114	0.531461	chip2_peak_5125
chr19	26113500	26113700	200	249.383	4.52665	0.000210835	0.485693	chip2_peak_4018
chr14	73161000	73161400	400	222.59	4.52693	0.000207966	1	chip1_peak_1318
chr2	69137200	69137400	200	222.594	4.527	0.000271726	1	chip1_peak_1728
chr7	92527900	92528200	300	249.418	4.5273	0.000404582	0.573783	chip2_peak_6679
chr4	140639400	140639600	200	222.627	4.52767	0.000931617	1	chip1_peak_6304
chr4	77237300	77237500	200	222.629	4.52772	0.000793122	1	chip1_peak_5284
chr2	145157700	145157900	200	222.645	4.52804	0.000685042	1	chip1_peak_4483
chr11	72735000	72735200	200	222.664	4.52842	0.00080421	1	chip1_peak_5362
chr8	117589400	117589600	200	222.692	4.529	0.000635602	1	chip1_peak_4144
chr2	38769000	38769200	200	249.521	4.52916	0.000122627	0.405901	chip2_peak_2743
chr14	100805300	100805600	300	249.524	4.52921	0.000503598	0.599984	chip2_peak_8018
chr16	44980000	44980200	200	249.556	4.5298	0.000939418	0.655357	chip2_peak_14076
chr17	83194500	83194700	200	249.556	4.5298	0.00064096	0.625985	chip2_peak_9926
chr4	45608900	45609100	200	222.778	4.53074	0.000753015	1	chip1_peak_4967
chr11	68493700	68493900	200	222.784	4.53087	0.000788636	1	chip1_peak_5245
chr9	50135400	50135600	200	249.629	4.53111	0.000574825	0.612626	chip2_peak_9054
chr1	19365500	19365700	200	249.674	4.53193	0.00088201	0.651913	chip2_peak_13268
chr2	23192900	23193100	200	222.845	4.53211	0.000449441	1	chip1_peak_2850
chr9	77503700	77503900	200	249.694	4.5323	0.000259302	0.515683	chip2_peak_4682
chr8	118070300	118070500	200	249.694	4.5323	0.000259302	0.515683	chip2_peak_4683
chr11	61669400	61669700	300	222.886	4.53294	0.000338735	1	chip1_peak_2143
chr5	38395300	38395500	200	249.744	4.5332	0.000281219	0.526832	chip2_peak_4986
chr11	121220100	121220300	200	249.755	4.53341	0.000879717	0.651913	chip2_peak_13222
chr11	65515900	65516100	200	222.915	4.53354	0.000826541	1	chip1_peak_5510
chr5	24812600	24812800	200	222.92	4.53363	0.000573695	1	chip1_peak_3694
chr2	102739600	102739800	200	222.92	4.53363	0.000890465	1	chip1_peak_5967
chr8	123446600	123446800	200	222.92	4.53363	0.000947465	1	chip1_peak_6428
chr15	53301000	53301200	200	222.922	4.53367	0.000921885	1	chip1_peak_6221
chr1	100817500	100817700	200	222.93	4.53384	0.000790199	1	chip1_peak_5260
chr6	121464900	121465100	200	222.93	4.53384	0.000792626	1	chip1_peak_5281
chr6	31786600	31786900	300	222.941	4.53406	0.0007238	1	chip1_peak_4746
chr18	33332400	33332600	200	222.944	4.53412	0.000254599	1	chip1_peak_1620
chr18	35359400	35359600	200	222.944	4.53412	0.000254599	1	chip1_peak_1621
chr8	88424100	88424300	200	249.799	4.53419	0.000223772	0.492572	chip2_peak_4210
chr6	37231300	37231500	200	222.95	4.53425	0.000392129	1	chip1_peak_2470
chr4	47366000	47366200	200	222.95	4.53425	0.000623766	1	chip1_peak_4062
chr14	21637900	21638100	200	249.837	4.53488	0.000877429	0.651913	chip2_peak_13180
chr12	30360900	30361200	300	249.84	4.53494	0.00023073	0.49783	chip2_peak_4300
chr8	27387700	27387900	200	249.848	4.53509	0.000249836	0.508456	chip2_peak_4563
chr10	76437200	76437400	200	222.999	4.53525	0.000764654	1	chip1_peak_5065
chr11	83807300	83807500	200	223.045	4.53617	0.000904	1	chip1_peak_6080
chr3	94319100	94319300	200	249.928	4.53654	0.000222627	0.491951	chip2_peak_4192
chr2	130220500	130220700	200	249.929	4.53656	0.00042457	0.581881	chip2_peak_6917
chr11	52248000	52248200	200	249.963	4.53718	0.000342649	0.556009	chip2_peak_5811
chr17	81278700	81278900	200	249.975	4.5374	0.000877647	0.651913	chip2_peak_13187
chr4	37676900	37677100	200	249.993	4.53773	0.000634503	0.625263	chip2_peak_9838
[truncated: 4,811 more rows]

## Sheet: WT
chr	start	end	length	signal value	fold change	p-value	Benjamini-Hochberg FDR	peak name
chr14	8078100	8078300	200	196.693	4.00024	0.000405446	1	chip1_peak_2570
chr12	110827100	110827400	300	196.694	4.00026	0.000586011	1	chip1_peak_3786
chr2	158007000	158007200	200	196.703	4.00044	0.000821119	1	chip1_peak_5469
chr15	59213200	59213400	200	196.717	4.00074	0.000719314	1	chip1_peak_4715
chr4	140436200	140436400	200	196.808	4.00258	7.17012e-05	1	chip1_peak_513
chr15	7165500	7165700	200	196.85	4.00345	0.000944041	1	chip1_peak_6411
chr7	98369800	98370000	200	196.892	4.0043	0.000613658	1	chip1_peak_3986
chr2	131217800	131218000	200	196.929	4.00505	2.40858e-05	0.935351	chip1_peak_225
chr15	25592000	25592200	200	196.941	4.00529	0.000929205	1	chip1_peak_6285
chr16	33187900	33188200	300	196.982	4.00612	0.000603244	1	chip1_peak_3922
chr11	45631900	45632100	200	197.091	4.00833	0.0007113	1	chip1_peak_4668
chr3	98244000	98244200	200	197.11	4.00872	0.000501248	1	chip1_peak_3194
chr5	114439900	114440100	200	197.11	4.00873	0.000934615	1	chip1_peak_6337
chr8	123240600	123240800	200	197.136	4.00926	0.000998827	1	chip1_peak_6816
chr2	60856800	60857100	300	197.147	4.00948	0.000218345	1	chip1_peak_1389
chr11	63922900	63923100	200	197.196	4.01047	0.000140551	1	chip1_peak_914
chr1	131960200	131960500	300	197.251	4.01159	0.000757748	1	chip1_peak_5002
chr11	16714700	16714900	200	197.304	4.01268	0.000137021	1	chip1_peak_894
chr9	45979400	45979600	200	197.31	4.0128	0.000703841	1	chip1_peak_4599
chr11	113269800	113270000	200	197.34	4.0134	0.000900155	1	chip1_peak_6045
chr1	59775900	59776100	200	197.341	4.01342	0.000894298	1	chip1_peak_5997
chr11	106908600	106908800	200	197.365	4.01391	0.000261781	1	chip1_peak_1665
chr19	46091200	46091400	200	197.37	4.01402	0.000319329	1	chip1_peak_2009
chr4	128184800	128185000	200	197.483	4.01631	0.000701822	1	chip1_peak_4583
chr11	33934800	33935100	300	197.491	4.01648	0.000928977	1	chip1_peak_6283
chr5	96535600	96535800	200	197.544	4.01754	0.000211784	1	chip1_peak_1343
chr7	98922900	98923100	200	197.555	4.01778	0.000790257	1	chip1_peak_5262
chr12	69781200	69781400	200	197.568	4.01804	0.000789801	1	chip1_peak_5255
chr16	14181300	14181500	200	197.568	4.01805	0.000784671	1	chip1_peak_5212
chr1	152856900	152857100	200	197.569	4.01807	0.000779574	1	chip1_peak_5170
chr12	64037000	64037200	200	197.569	4.01807	0.000832541	1	chip1_peak_5555
chr15	98709100	98709300	200	197.582	4.01833	0.000890603	1	chip1_peak_5970
chr10	21452100	21452300	200	197.583	4.01835	0.000884809	1	chip1_peak_5930
chr11	88168900	88169100	200	197.585	4.01838	0.000779364	1	chip1_peak_5164
chr15	59332500	59332800	300	197.607	4.01884	0.00027382	1	chip1_peak_1742
chr1	132148200	132148600	400	197.732	4.02138	0.00021761	1	chip1_peak_1385
chr18	16765100	16765300	200	197.742	4.02158	0.000977949	1	chip1_peak_6654
chr7	130642000	130642200	200	197.805	4.02286	0.000781435	1	chip1_peak_5185
chr11	76819600	76819800	200	197.805	4.02287	0.00077636	1	chip1_peak_5135
chr12	103203100	103203300	200	197.825	4.02326	0.000881155	1	chip1_peak_5896
chr11	20065700	20065900	200	197.825	4.02326	0.000881155	1	chip1_peak_5897
chr4	136321600	136321800	200	197.825	4.02326	0.000881155	1	chip1_peak_5898
chr17	45681800	45682000	200	197.858	4.02394	0.000976518	1	chip1_peak_6645
chr13	95635700	95635900	200	197.94	4.02561	0.000670885	1	chip1_peak_4379
chr6	86685300	86685500	200	197.963	4.02607	0.000150394	1	chip1_peak_965
chr13	42133000	42133200	200	197.994	4.02671	0.000150129	1	chip1_peak_964
chr19	41508000	41508200	200	197.998	4.02678	0.000817626	1	chip1_peak_5448
chr9	61827500	61827700	200	198.009	4.02702	0.000182904	1	chip1_peak_1156
chr9	43201600	43201800	200	198.018	4.02719	0.000884373	1	chip1_peak_5919
chr17	43758400	43758600	200	198.018	4.02719	0.000681353	1	chip1_peak_4463
chr14	66816600	66816800	200	198.042	4.02768	0.00077316	1	chip1_peak_5111
chr8	124717300	124717500	200	198.052	4.02788	0.000178694	1	chip1_peak_1129
chr7	35672700	35672900	200	198.067	4.02819	0.000871809	1	chip1_peak_5825
chr6	38784300	38784500	200	198.067	4.02819	0.000871809	1	chip1_peak_5826
chr6	97921700	97921900	200	198.156	4.02999	0.000683951	1	chip1_peak_4475
chr11	79223800	79224000	200	198.159	4.03005	7.45101e-05	1	chip1_peak_523
chr15	8638900	8639100	200	198.241	4.03174	0.000977003	1	chip1_peak_6648
chr5	35075100	35075400	300	198.297	4.03288	0.000249151	1	chip1_peak_1586
chr1	53055900	53056200	300	198.337	4.03368	0.000501365	1	chip1_peak_3197
chr6	140470800	140471200	400	198.341	4.03376	0.000394606	1	chip1_peak_2485
chr4	3777700	3777900	200	198.356	4.03406	0.00020145	1	chip1_peak_1278
chr5	119974500	119974700	200	198.451	4.036	0.000419599	1	chip1_peak_2672
chr3	135385400	135385600	200	198.657	4.04019	0.000752098	1	chip1_peak_4959
chr2	68002400	68002700	300	198.686	4.04077	8.67383e-05	1	chip1_peak_609
chr13	55284800	55285100	300	198.733	4.04173	0.000125582	1	chip1_peak_824
chr2	31970700	31971000	300	198.752	4.04213	0.000475675	1	chip1_peak_3034
chr3	83980000	83980200	200	198.766	4.04241	0.000334656	1	chip1_peak_2109
chr14	30478800	30479000	200	198.85	4.04411	0.000672382	1	chip1_peak_4394
chr11	88566600	88566800	200	198.851	4.04414	0.000660096	1	chip1_peak_4303
chr5	35394200	35394400	200	198.894	4.04501	0.00074414	1	chip1_peak_4897
chr16	24549700	24550100	400	198.9	4.04512	0.000824065	1	chip1_peak_5486
chr19	41377800	41378000	200	198.941	4.04597	6.03409e-05	1	chip1_peak_442
chr5	117100300	117100500	200	198.984	4.04685	0.00032412	1	chip1_peak_2039
chr6	114375600	114375800	200	198.999	4.04715	0.000945669	1	chip1_peak_6421
chr8	64725600	64725800	200	199.049	4.04815	0.00072968	1	chip1_peak_4784
chr8	64726500	64726800	300	199.058	4.04834	6.25729e-07	0.124185	chip1_peak_34
chr5	141746800	141747000	200	199.082	4.04883	0.000927384	1	chip1_peak_6266
chr4	32240400	32240600	200	199.131	4.04983	0.000736269	1	chip1_peak_4846
chr4	123903300	123903500	200	199.158	4.05038	0.000602371	1	chip1_peak_3916
chr16	24184300	24184600	300	199.163	4.05049	0.000166461	1	chip1_peak_1050
chr9	45240500	45240700	200	199.201	4.05126	0.000320541	1	chip1_peak_2015
chr11	75756200	75756400	200	199.27	4.05265	0.000722158	1	chip1_peak_4738
chr11	102902300	102902500	200	199.272	4.0527	0.000731622	1	chip1_peak_4807
chr2	31033300	31033600	300	199.304	4.05335	0.000377794	1	chip1_peak_2391
chr19	47443700	47443900	200	199.332	4.05392	0.000461069	1	chip1_peak_2939
chr16	14318000	14318200	200	199.335	4.05398	0.000567887	1	chip1_peak_3658
chr13	71258000	71258200	200	199.339	4.05405	0.000813996	1	chip1_peak_5422
chr17	31408900	31409100	200	199.478	4.05688	0.000276333	1	chip1_peak_1760
chr11	24363900	24364100	200	199.498	4.05729	0.000120491	1	chip1_peak_791
chr4	153500700	153500900	200	199.508	4.05749	0.00071919	1	chip1_peak_4714
chr7	72100400	72100600	200	199.568	4.05872	0.000816167	1	chip1_peak_5436
chr12	100872700	100872900	200	199.643	4.06024	0.000919852	1	chip1_peak_6205
chr4	106969600	106970100	500	199.655	4.06049	3.3632e-05	1	chip1_peak_282
chr6	140243400	140243600	200	199.655	4.06049	0.000907674	1	chip1_peak_6117
chr6	115734300	115734500	200	199.727	4.06196	0.000136752	1	chip1_peak_891
chr4	101820800	101821000	200	199.736	4.06212	0.000311898	1	chip1_peak_1953
chr8	114065300	114065600	300	199.746	4.06233	0.000337943	1	chip1_peak_2134
chr11	81828400	81828600	200	199.755	4.06253	0.000732607	1	chip1_peak_4815
chr9	116264600	116264800	200	199.757	4.06256	0.000711179	1	chip1_peak_4665
chr17	26786400	26786600	200	199.757	4.06256	0.000856574	1	chip1_peak_5714
chr19	16044700	16044900	200	199.771	4.06284	0.000706376	1	chip1_peak_4623
chr7	138706400	138706600	200	199.799	4.06341	0.000890233	1	chip1_peak_5963
chr1	160509800	160510100	300	199.801	4.06346	0.000581942	1	chip1_peak_3747
chr18	56455000	56455200	200	199.802	4.06348	0.000351057	1	chip1_peak_2220
chr9	74853600	74853800	200	199.81	4.06365	0.000807526	1	chip1_peak_5388
chr1	10162200	10162500	300	199.812	4.06367	0.000519014	1	chip1_peak_3322
chr2	91015200	91015400	200	199.822	4.06387	0.000801817	1	chip1_peak_5346
chr8	33639400	33639600	200	199.824	4.06391	0.000807061	1	chip1_peak_5384
chr6	22323000	22323200	200	199.828	4.064	0.000241886	1	chip1_peak_1547
chr19	9037800	9038000	200	199.835	4.06415	0.000796394	1	chip1_peak_5306
chr3	130807900	130808200	300	199.88	4.06506	0.000467422	1	chip1_peak_2977
chr4	120968900	120969100	200	199.882	4.06511	0.000561186	1	chip1_peak_3617
chr15	32187700	32187900	200	199.891	4.06528	0.000910099	1	chip1_peak_6133
chr16	33319100	33319300	200	199.903	4.06553	0.000104975	1	chip1_peak_724
chr1	132698100	132698300	200	199.915	4.06577	0.000758549	1	chip1_peak_5011
chr19	38995800	38996000	200	199.915	4.06577	0.000838867	1	chip1_peak_5600
chr2	34485400	34485600	200	199.916	4.06579	0.00034906	1	chip1_peak_2211
chr4	136444600	136444900	300	199.982	4.06714	0.000281651	1	chip1_peak_1776
chr7	99538200	99538400	200	199.994	4.06738	0.000981404	1	chip1_peak_6683
chr16	32420300	32420500	200	200.001	4.06752	0.000268894	1	chip1_peak_1712
chr7	144758600	144758800	200	200.074	4.06901	0.000508973	1	chip1_peak_3252
chr2	71610800	71611200	400	200.076	4.06906	0.000321194	1	chip1_peak_2019
chr10	110912100	110912400	300	200.109	4.06972	0.00017313	1	chip1_peak_1093
chr13	101786900	101787100	200	200.139	4.07033	0.000900452	1	chip1_peak_6052
chr12	103450000	103450200	200	200.147	4.07049	0.000649122	1	chip1_peak_4233
chr8	128270700	128270900	200	200.149	4.07053	0.00062204	1	chip1_peak_4047
chr11	119643600	119643800	200	200.202	4.0716	0.000431473	1	chip1_peak_2743
chr15	74348300	74348500	200	200.226	4.07209	0.000798425	1	chip1_peak_5318
chr9	75610900	75611100	200	200.233	4.07224	0.000700775	1	chip1_peak_4569
chr10	128815300	128815500	200	200.286	4.07332	0.000553667	1	chip1_peak_3574
chr5	113309600	113309800	200	200.302	4.07365	0.000985639	1	chip1_peak_6712
chr7	113036900	113037100	200	200.308	4.07377	0.00079007	1	chip1_peak_5259
chr8	13611800	13612000	200	200.392	4.07547	0.000995208	1	chip1_peak_6789
chr8	14216700	14217000	300	200.42	4.07604	0.000678725	1	chip1_peak_4442
chr11	51470900	51471300	400	200.444	4.07652	0.000242525	1	chip1_peak_1550
chr11	118511700	118511900	200	200.459	4.07684	0.000251695	1	chip1_peak_1604
chr15	83512800	83513000	200	200.539	4.07847	0.000232926	1	chip1_peak_1491
chr7	98063200	98063400	200	200.563	4.07896	0.000130342	1	chip1_peak_849
chr18	35036700	35036900	200	200.611	4.07994	0.000871076	1	chip1_peak_5816
chr5	23795200	23795400	200	200.616	4.08003	0.000539901	1	chip1_peak_3471
chr15	64116200	64116400	200	200.636	4.08044	0.000326064	1	chip1_peak_2058
chr5	34409300	34409500	200	200.642	4.08055	0.000978234	1	chip1_peak_6659
chr1	178389400	178389600	200	200.705	4.08184	0.000766517	1	chip1_peak_5075
chr16	70414900	70415100	200	200.76	4.08296	0.000600894	1	chip1_peak_3899
chr11	34274300	34274500	200	200.769	4.08315	0.00059298	1	chip1_peak_3848
chr16	7150400	7150600	200	200.783	4.08342	0.000875899	1	chip1_peak_5854
chr10	40244100	40244300	200	200.79	4.08357	0.000872067	1	chip1_peak_5828
chr3	82945500	82945700	200	200.802	4.08381	0.000868061	1	chip1_peak_5805
chr2	178630700	178630900	200	200.818	4.08413	0.000443575	1	chip1_peak_2813
chr3	30015600	30015800	200	200.842	4.08463	0.000672917	1	chip1_peak_4398
chr5	140166300	140166500	200	200.898	4.08577	0.000293898	1	chip1_peak_1844
chr9	73130800	73131000	200	200.898	4.08577	0.000306114	1	chip1_peak_1910
chr4	129910600	129910800	200	200.995	4.08774	0.000598434	1	chip1_peak_3882
chr17	78283000	78283200	200	201.015	4.08814	0.000355068	1	chip1_peak_2244
chr18	68198300	68198500	200	201.04	4.08865	0.000600389	1	chip1_peak_3894
chr2	134802500	134802700	200	201.054	4.08893	0.000854666	1	chip1_peak_5705
chr10	21332000	21332200	200	201.085	4.08958	0.000674532	1	chip1_peak_4407
chr1	69433700	69433900	200	201.093	4.08973	0.000738624	1	chip1_peak_4858
chr1	92332400	92332600	200	201.123	4.09033	0.000583198	1	chip1_peak_3758
chr3	101444600	101444800	200	201.18	4.0915	0.000760441	1	chip1_peak_5026
chr6	54280500	54280700	200	201.234	4.0926	0.000285232	1	chip1_peak_1797
chr16	94150500	94150700	200	201.266	4.09324	0.00081064	1	chip1_peak_5404
chr4	137119000	137119200	200	201.301	4.09395	0.000946648	1	chip1_peak_6426
chr7	141659500	141659700	200	201.33	4.09455	0.000250895	1	chip1_peak_1599
chr16	16989200	16989400	200	201.436	4.0967	0.000884502	1	chip1_peak_5923
chr19	12603000	12603200	200	201.456	4.09711	0.000654642	1	chip1_peak_4266
chr11	18696700	18696900	200	201.459	4.09717	0.000585889	1	chip1_peak_3782
chr6	145235100	145235300	200	201.459	4.09717	0.000585889	1	chip1_peak_3783
chr5	147929300	147929500	200	201.459	4.09717	0.000585889	1	chip1_peak_3784
chr18	12433900	12434100	200	201.484	4.09767	0.000138808	1	chip1_peak_901
chr15	96909100	96909300	200	201.512	4.09826	0.000883346	1	chip1_peak_5911
chr5	28375100	28375300	200	201.542	4.09887	0.00031233	1	chip1_peak_1958
chr16	35428900	35429100	200	201.558	4.0992	0.000297306	1	chip1_peak_1864
chr9	66846400	66846600	200	201.588	4.09979	0.000737364	1	chip1_peak_4849
chr12	39906800	39907000	200	201.588	4.09979	0.000757224	1	chip1_peak_4999
chr4	107631300	107631500	200	201.591	4.09985	0.000122878	1	chip1_peak_806
chr13	23972700	23973000	300	201.602	4.10008	0.000588902	1	chip1_peak_3818
chr3	116788900	116789100	200	201.603	4.1001	0.000458622	1	chip1_peak_2919
chr5	138197800	138198000	200	201.729	4.10267	0.000559922	1	chip1_peak_3611
chr12	104187800	104188000	200	201.744	4.10297	0.000761901	1	chip1_peak_5040
chr14	45488100	45488300	200	201.757	4.10324	0.000316014	1	chip1_peak_1982
chr15	76623400	76623600	200	201.765	4.10339	2.6893e-06	0.316011	chip1_peak_68
chr4	129280300	129280600	300	201.769	4.10347	0.000763746	1	chip1_peak_5058
chr15	16491300	16491500	200	201.846	4.10504	0.000641531	1	chip1_peak_4177
chr15	15868200	15868400	200	201.96	4.10737	0.000931653	1	chip1_peak_6307
chr1	187465800	187466100	300	201.965	4.10747	0.000616171	1	chip1_peak_4000
chr9	62706800	62707000	200	202.051	4.10922	0.000747351	1	chip1_peak_4922
chr10	61386700	61386900	200	202.051	4.10922	0.000955797	1	chip1_peak_6491
chr14	122054100	122054300	200	202.06	4.1094	0.000726781	1	chip1_peak_4767
chr7	55999300	55999500	200	202.071	4.10963	0.000721872	1	chip1_peak_4735
chr13	76833700	76833900	200	202.1	4.1102	0.000623887	1	chip1_peak_4063
chr12	34280300	34280500	200	202.194	4.11212	0.000854376	1	chip1_peak_5703
chr11	121287800	121288100	300	202.2	4.11224	4.71238e-05	1	chip1_peak_362
chr8	12257000	12257200	200	202.213	4.11252	0.000921785	1	chip1_peak_6220
chr11	53748700	53749000	300	202.282	4.1139	2.00251e-05	0.886225	chip1_peak_192
chr6	90775000	90775300	300	202.284	4.11395	0.000494476	1	chip1_peak_3153
chr14	121080700	121080900	200	202.302	4.11432	0.000719108	1	chip1_peak_4713
chr13	41640100	41640400	300	202.307	4.11443	0.000355777	1	chip1_peak_2252
chr2	25035000	25035300	300	202.347	4.11522	0.000783241	1	chip1_peak_5204
chr17	31338000	31338200	200	202.363	4.11556	0.000212891	1	chip1_peak_1353
chr13	99698700	99699000	300	202.368	4.11566	0.000541582	1	chip1_peak_3489
chr19	41584700	41584900	200	202.385	4.11601	0.000604943	1	chip1_peak_3933
chr17	83933300	83933500	200	202.412	4.11655	0.000635676	1	chip1_peak_4145
chr10	57663800	57664000	200	202.438	4.11709	0.000545648	1	chip1_peak_3522
chr10	107311900	107312100	200	202.553	4.11942	0.000631679	1	chip1_peak_4124
chr6	71971700	71972000	300	202.564	4.11965	0.000352142	1	chip1_peak_2228
chr3	133317000	133317200	200	202.571	4.11979	0.000610809	1	chip1_peak_3968
chr19	10898100	10898300	200	202.574	4.11985	0.000817325	1	chip1_peak_5444
chr14	98874900	98875200	300	202.652	4.12143	0.000396249	1	chip1_peak_2496
chr9	64246100	64246300	200	202.657	4.12154	0.000550982	1	chip1_peak_3561
chr13	54864200	54864500	300	202.661	4.12161	0.000367827	1	chip1_peak_2322
chr7	98515800	98516000	200	202.661	4.12163	0.000482218	1	chip1_peak_3071
chr11	5847700	5847900	200	202.685	4.12211	0.00099323	1	chip1_peak_6774
chr15	59312200	59312400	200	202.714	4.12271	0.000896498	1	chip1_peak_6016
chr10	127783900	127784100	200	202.728	4.12298	0.000895981	1	chip1_peak_6010
chr5	105882400	105882600	200	202.73	4.12303	0.000704315	1	chip1_peak_4601
chr2	32493000	32493200	200	202.835	4.12516	0.000898393	1	chip1_peak_6028
chr2	172742700	172743100	400	202.865	4.12577	0.000401926	1	chip1_peak_2542
chr6	126007800	126008000	200	202.894	4.12636	0.000548734	1	chip1_peak_3541
chr7	70175900	70176100	200	202.896	4.12639	0.00054135	1	chip1_peak_3484
chr10	128427000	128427200	200	202.964	4.12777	0.000729506	1	chip1_peak_4783
chr2	52285900	52286100	200	202.981	4.12813	0.0008865	1	chip1_peak_5935
chr13	102847500	102847700	200	203.028	4.12909	0.000610105	1	chip1_peak_3963
chr13	107882000	107882200	200	203.04	4.12932	0.000905454	1	chip1_peak_6092
chr12	106288700	106288900	200	203.04	4.12932	0.000909136	1	chip1_peak_6127
chr6	71486800	71487000	200	203.071	4.12995	0.000203711	1	chip1_peak_1292
chr11	69555800	69556000	200	203.076	4.13007	0.000793882	1	chip1_peak_5290
chr5	112440900	112441100	200	203.094	4.13043	0.000907195	1	chip1_peak_6109
chr9	35338900	35339200	300	203.16	4.13177	0.000539994	1	chip1_peak_3473
chr2	29960000	29960300	300	203.177	4.13211	0.000118532	1	chip1_peak_786
chr12	104913100	104913300	200	203.193	4.13243	0.000126044	1	chip1_peak_827
chr12	71828300	71828500	200	203.204	4.13266	0.000616732	1	chip1_peak_4004
chr11	79265500	79265800	300	203.205	4.13269	0.000105961	1	chip1_peak_728
chr1	59083100	59083300	200	203.246	4.13352	0.000529158	1	chip1_peak_3393
chr7	43440500	43440800	300	203.26	4.1338	4.78734e-05	1	chip1_peak_370
chr5	28064700	28064900	200	203.271	4.13402	0.000607615	1	chip1_peak_3953
chr3	116686400	116686600	200	203.271	4.13402	0.000955587	1	chip1_peak_6489
chr7	71330600	71330800	200	203.285	4.13431	0.000569932	1	chip1_peak_3671
chr5	139094000	139094200	200	203.321	4.13504	0.000827249	1	chip1_peak_5518
chr12	108893000	108893300	300	203.327	4.13516	3.81727e-05	1	chip1_peak_304
chr9	117899400	117899600	200	203.358	4.1358	0.000839829	1	chip1_peak_5603
chr11	29870100	29870300	200	203.364	4.13593	0.000533475	1	chip1_peak_3423
chr16	30900500	30900700	200	203.415	4.13695	0.0006849	1	chip1_peak_4481
chr11	69688800	69689000	200	203.421	4.13708	0.000689371	1	chip1_peak_4512
chr13	96578800	96579000	200	203.454	4.13775	0.000178033	1	chip1_peak_1123
chr4	131859400	131859700	300	203.487	4.13842	0.000344208	1	chip1_peak_2173
chr13	23771900	23772100	200	203.514	4.13896	0.000605136	1	chip1_peak_3936
chr11	84347900	84348100	200	203.541	4.13952	0.000256823	1	chip1_peak_1630
chr12	102656200	102656600	400	203.565	4.14	4.27038e-05	1	chip1_peak_333
chr9	110640500	110640700	200	203.573	4.14016	0.000859956	1	chip1_peak_5742
chr13	88184800	88185000	200	203.596	4.14064	0.000736408	1	chip1_peak_4847
chr1	131999100	131999300	200	203.602	4.14076	0.000531302	1	chip1_peak_3411
chr16	26693000	26693200	200	203.678	4.14229	0.000123467	1	chip1_peak_813
chr4	63388800	63389100	300	203.696	4.14267	0.000620418	1	chip1_peak_4034
chr15	100797800	100798000	200	203.741	4.14359	0.000252514	1	chip1_peak_1609
chr1	82636600	82636800	200	203.77	4.14418	8.23573e-05	1	chip1_peak_572
chr2	91699800	91700200	400	203.778	4.14433	3.62015e-05	1	chip1_peak_295
chr11	54108100	54108400	300	203.787	4.14451	0.000256769	1	chip1_peak_1629
chr11	117459500	117459700	200	203.808	4.14495	0.000487671	1	chip1_peak_3104
chr16	18194000	18194200	200	203.808	4.14495	0.000896244	1	chip1_peak_6014
chr4	139080500	139080700	200	203.82	4.14519	0.000223396	1	chip1_peak_1426
chr1	91051200	91051500	300	203.85	4.1458	0.000287398	1	chip1_peak_1810
chr1	91821300	91821500	200	203.892	4.14666	0.000595007	1	chip1_peak_3861
chr9	63101900	63102100	200	203.892	4.14666	0.000595007	1	chip1_peak_3862
chr11	82783200	82783400	200	204.022	4.14929	0.000290975	1	chip1_peak_1830
chr12	25129900	25130100	200	204.058	4.15004	0.000248467	1	chip1_peak_1582
chr16	33211500	33211700	200	204.064	4.15016	0.000250071	1	chip1_peak_1593
chr11	76289800	76290000	200	204.115	4.15119	0.00058115	1	chip1_peak_3746
chr5	7971000	7971200	200	204.119	4.15127	0.000721927	1	chip1_peak_4736
chr6	34325200	34325500	300	204.209	4.15311	0.000655307	1	chip1_peak_4270
chr1	34297100	34297300	200	204.224	4.1534	0.000787494	1	chip1_peak_5235
chr17	35518400	35518600	200	204.231	4.15356	0.000745674	1	chip1_peak_4909
chr1	133706600	133706800	200	204.231	4.15356	0.000745674	1	chip1_peak_4910
chr10	121075100	121075300	200	204.237	4.15367	0.000437472	1	chip1_peak_2776
chr9	42040100	42040300	200	204.272	4.15438	0.000795143	1	chip1_peak_5296
chr16	17260600	17260800	200	204.338	4.15572	0.000216014	1	chip1_peak_1376
chr11	103961100	103961300	200	204.364	4.15626	0.000973081	1	chip1_peak_6626
chr17	47181900	47182100	200	204.366	4.1563	0.000582554	1	chip1_peak_3750
chr16	90164600	90164800	200	204.366	4.1563	0.000582554	1	chip1_peak_3751
chr12	41238900	41239100	200	204.392	4.15682	0.0001887	1	chip1_peak_1184
chr4	130750500	130750700	200	204.392	4.15683	0.000672343	1	chip1_peak_4393
chr2	4156700	4156900	200	204.404	4.15707	0.000191138	1	chip1_peak_1196
chr12	70587500	70587700	200	204.405	4.15709	0.000840781	1	chip1_peak_5612
chr4	80946300	80946600	300	204.476	4.15854	0.000793882	1	chip1_peak_5291
chr12	100788100	100788400	300	204.513	4.15929	0.000945882	1	chip1_peak_6423
chr7	100023200	100023400	200	204.541	4.15985	0.000651985	1	chip1_peak_4252
chr9	43141100	43141600	500	204.595	4.16094	0.000226663	1	chip1_peak_1453
chr11	117889900	117890100	200	204.601	4.16107	0.000680799	1	chip1_peak_4456
chr16	31763600	31763800	200	204.641	4.1619	6.95261e-05	1	chip1_peak_500
chr12	45256300	45256500	200	204.703	4.16314	0.000993566	1	chip1_peak_6778
chr13	69673300	69673500	200	204.783	4.16477	0.000493279	1	chip1_peak_3141
chr7	99508900	99509100	200	204.783	4.16477	0.00064512	1	chip1_peak_4202
chr10	69617100	69617300	200	204.809	4.16531	9.01598e-05	1	chip1_peak_629
chr4	45858700	45858900	200	204.84	4.16594	0.000990452	1	chip1_peak_6751
chr6	90650800	90651000	200	204.874	4.16662	0.000725435	1	chip1_peak_4759
chr16	31205000	31205200	200	204.905	4.16725	0.00018365	1	chip1_peak_1159
chr4	47301200	47301400	200	204.994	4.16906	0.000559012	1	chip1_peak_3602
chr18	35136400	35136600	200	205.126	4.17176	0.000601943	1	chip1_peak_3911
chr4	44397200	44397400	200	205.23	4.17387	0.000553138	1	chip1_peak_3571
chr19	56406200	56406400	200	205.264	4.17457	0.000205876	1	chip1_peak_1308
chr5	118280200	118280400	200	205.322	4.17573	0.000967783	1	chip1_peak_6576
chr8	45769400	45769600	200	205.394	4.1772	0.000494561	1	chip1_peak_3154
chr3	151843000	151843200	200	205.485	4.17904	0.000699342	1	chip1_peak_4560
chr9	103970400	103970700	300	205.509	4.17954	0.000121663	1	chip1_peak_797
chr6	100948600	100948800	200	205.663	4.18266	0.000625093	1	chip1_peak_4075
chr3	135797600	135797800	200	205.696	4.18335	0.00054525	1	chip1_peak_3518
chr6	135562700	135562900	200	205.705	4.18353	0.000548799	1	chip1_peak_3543
chr13	41410200	41410500	300	205.97	4.18891	0.000155738	1	chip1_peak_983
chr17	84675700	84675900	200	205.975	4.18902	0.000407286	1	chip1_peak_2580
chr8	77252700	77253000	300	206.061	4.19076	0.000758361	1	chip1_peak_5008
chr3	75534200	75534400	200	206.194	4.19348	0.000194856	1	chip1_peak_1225
chr18	35756000	35756200	200	206.251	4.19464	0.000674474	1	chip1_peak_4406
chr11	111890200	111890400	200	206.415	4.19797	0.000421644	1	chip1_peak_2688
chr6	47468700	47468900	200	206.423	4.19814	0.000171841	1	chip1_peak_1084
chr5	114368600	114368800	200	206.532	4.20035	0.000166314	1	chip1_peak_1048
chr5	121325900	121326100	200	206.543	4.20058	0.000593522	1	chip1_peak_3854
chr4	105150800	105151000	200	206.584	4.20141	0.000397962	1	chip1_peak_2508
chr17	57200600	57200900	300	206.62	4.20214	0.000425868	1	chip1_peak_2714
chr2	121409700	121409900	200	206.649	4.20273	0.000364483	1	chip1_peak_2305
chr13	119415600	119415800	200	206.694	4.20365	0.000518156	1	chip1_peak_3316
chr1	37067800	37068000	200	206.794	4.20568	0.000522824	1	chip1_peak_3350
chr14	30684700	30684900	200	206.816	4.20611	0.000263766	1	chip1_peak_1678
chr7	125739900	125740100	200	206.82	4.2062	8.02279e-05	1	chip1_peak_557
chr19	42356300	42356500	200	206.822	4.20624	0.000921705	1	chip1_peak_6219
chr5	111972400	111972600	200	206.822	4.20624	0.000860092	1	chip1_peak_5745
chr4	107238300	107238600	300	206.875	4.20732	0.000667145	1	chip1_peak_4347
chr7	130726400	130726600	200	206.917	4.20818	0.000448854	1	chip1_peak_2845
chr6	72395300	72395500	200	206.919	4.20821	0.000447488	1	chip1_peak_2833
chr9	45947300	45947500	200	206.991	4.20967	0.000454249	1	chip1_peak_2887
chr12	86306200	86306400	200	206.991	4.20969	0.000376642	1	chip1_peak_2385
chr3	126356300	126356500	200	206.998	4.20983	0.000767463	1	chip1_peak_5077
chr4	109672100	109672300	200	207.019	4.21026	0.00067081	1	chip1_peak_4378
chr16	24444200	24444400	200	207.032	4.21052	0.000588872	1	chip1_peak_3817
chr8	22042200	22042400	200	207.164	4.2132	0.000880009	1	chip1_peak_5886
chr15	6601000	6601200	200	207.224	4.21443	0.000543229	1	chip1_peak_3501
chr15	82124800	82125100	300	207.281	4.21558	0.000396452	1	chip1_peak_2497
chr15	53289200	53289400	200	207.317	4.21631	0.000929679	1	chip1_peak_6290
chr12	29176600	29176900	300	207.317	4.21632	0.000189509	1	chip1_peak_1189
chr1	65044200	65044500	300	207.324	4.21646	9.85726e-05	1	chip1_peak_681
chr6	127613600	127613800	200	207.333	4.21663	0.000239205	1	chip1_peak_1530
chr16	38489200	38489400	200	207.409	4.21818	0.000650895	1	chip1_peak_4243
chr15	80487100	80487300	200	207.413	4.21826	0.000571416	1	chip1_peak_3679
chr8	124670500	124670700	200	207.413	4.21826	0.000571416	1	chip1_peak_3680
chr11	104405000	104405200	200	207.439	4.2188	0.000158535	1	chip1_peak_1002
chr3	100446700	100446900	200	207.462	4.21926	0.000111933	1	chip1_peak_758
chr5	24914400	24914600	200	207.534	4.22073	0.000311327	1	chip1_peak_1946
chr3	95169900	95170100	200	207.553	4.22111	0.000475929	1	chip1_peak_3039
chr18	51270700	51270900	200	207.637	4.22282	0.000496615	1	chip1_peak_3168
chr9	70215300	70215500	200	207.637	4.22282	0.000528992	1	chip1_peak_3392
chr13	12574100	12574300	200	207.655	4.22318	0.000853977	1	chip1_peak_5700
chr15	83256200	83256400	200	207.87	4.22756	0.000206093	1	chip1_peak_1310
chr1	191074900	191075100	200	207.885	4.22786	0.000494608	1	chip1_peak_3155
chr16	72904500	72904700	200	207.892	4.228	0.00056448	1	chip1_peak_3638
chr15	58887500	58887700	200	208.047	4.23116	0.000218269	1	chip1_peak_1388
chr5	112051100	112051300	200	208.048	4.23118	0.000532924	1	chip1_peak_3420
chr12	107110700	107110900	200	208.159	4.23344	0.000639012	1	chip1_peak_4166
chr18	64551200	64551400	200	208.224	4.23476	0.000421672	1	chip1_peak_2689
chr3	30748200	30748400	200	208.236	4.235	0.000633034	1	chip1_peak_4132
chr1	187255000	187255200	200	208.285	4.236	7.31911e-05	1	chip1_peak_519
chr9	67821100	67821400	300	208.302	4.23634	0.000584936	1	chip1_peak_3771
chr4	57268800	57269000	200	208.389	4.23811	0.000641794	1	chip1_peak_4180
chr15	81237200	81237400	200	208.426	4.23886	5.42712e-05	1	chip1_peak_410
chr17	86610900	86611100	200	208.455	4.23946	0.000417264	1	chip1_peak_2659
chr11	101964300	101964500	200	208.471	4.23978	0.000962524	1	chip1_peak_6545
chr7	71784300	71784500	200	208.534	4.24106	0.000611703	1	chip1_peak_3975
chr17	28144600	28144800	200	208.614	4.24268	0.000195808	1	chip1_peak_1233
chr11	84425300	84425500	200	208.634	4.2431	0.000517592	1	chip1_peak_3310
chr4	104788100	104788300	200	208.704	4.24453	0.000197556	1	chip1_peak_1250
chr1	23108300	23108500	200	208.711	4.24466	0.000556565	1	chip1_peak_3590
chr9	22088400	22088600	200	208.749	4.24543	0.000149962	1	chip1_peak_962
chr14	104896900	104897100	200	208.749	4.24543	0.000479335	1	chip1_peak_3059
chr6	146763600	146763800	200	208.807	4.24662	0.000765211	1	chip1_peak_5067
chr6	145052200	145052400	200	208.836	4.24721	0.000747483	1	chip1_peak_4926
chr9	118665300	118665500	200	208.836	4.24721	0.000412992	1	chip1_peak_2619
chr8	82418700	82418900	200	208.881	4.24811	0.000470085	1	chip1_peak_3001
chr3	60467800	60468000	200	208.955	4.24963	0.000416596	1	chip1_peak_2653
chr3	100835500	100835700	200	208.986	4.25025	0.000474319	1	chip1_peak_3026
chr7	141874800	141875100	300	209.047	4.25149	0.000528367	1	chip1_peak_3386
chr4	129909700	129909900	200	209.068	4.25192	0.000408677	1	chip1_peak_2592
chr14	25018100	25018300	200	209.071	4.25198	0.000405935	1	chip1_peak_2571
chr5	35434600	35434800	200	209.116	4.2529	0.000905914	1	chip1_peak_6096
chr12	79523400	79523700	300	209.138	4.25334	0.000320145	1	chip1_peak_2014
chr8	105548800	105549100	300	209.208	4.25477	0.000206866	1	chip1_peak_1316
chrX	48462300	48462500	200	209.223	4.25507	0.000469356	1	chip1_peak_2995
chr10	25950200	25950400	200	209.223	4.25507	0.000469356	1	chip1_peak_2996
chr6	145439600	145439800	200	209.263	4.25589	0.000860199	1	chip1_peak_5746
chr6	145463700	145463900	200	209.313	4.2569	0.000825768	1	chip1_peak_5501
chr1	104604400	104604600	200	209.343	4.25752	0.000747176	1	chip1_peak_4920
chr4	128937700	128937900	200	209.343	4.25752	0.000801058	1	chip1_peak_5342
chr14	33078200	33078400	200	209.394	4.25855	0.000524155	1	chip1_peak_3360
chr15	27986800	27987000	200	209.398	4.25863	0.000166251	1	chip1_peak_1047
chr5	45706700	45707000	300	209.492	4.26055	0.000407852	1	chip1_peak_2585
chr12	5129000	5129200	200	209.561	4.26195	0.00060203	1	chip1_peak_3912
chr17	72177400	72177600	200	209.561	4.26195	0.000923796	1	chip1_peak_6240
chr4	151825700	151825900	200	209.668	4.26413	0.000582765	1	chip1_peak_3753
chr12	105353300	105353600	300	209.693	4.26464	0.00013921	1	chip1_peak_906
chr9	45238200	45238500	300	209.74	4.26559	7.21144e-05	1	chip1_peak_517
chr7	144107800	144108000	200	209.81	4.26702	0.000664792	1	chip1_peak_4334
chr16	81387700	81387900	200	209.823	4.26728	0.000450589	1	chip1_peak_2857
chr6	77548700	77548900	200	209.823	4.26728	0.000961339	1	chip1_peak_6535
chr7	4838000	4838200	200	209.944	4.26974	0.000584195	1	chip1_peak_3763
chr11	84250800	84251000	200	209.954	4.26994	0.000182848	1	chip1_peak_1155
chr7	116360400	116360600	200	209.979	4.27044	0.000185211	1	chip1_peak_1166
chr13	63190800	63191100	300	209.995	4.27077	0.000870714	1	chip1_peak_5815
chr5	21029200	21029400	200	210.074	4.27239	0.000234298	1	chip1_peak_1504
chr8	15138200	15138400	200	210.088	4.27267	0.000891022	1	chip1_peak_5974
chr3	105754700	105755000	300	210.144	4.27381	0.000776779	1	chip1_peak_5139
chr16	33326200	33326500	300	210.35	4.278	0.000298543	1	chip1_peak_1870
chr11	76503500	76503800	300	210.392	4.27886	0.000588377	1	chip1_peak_3810
chr9	46025000	46025300	300	210.449	4.28	0.000154382	1	chip1_peak_979
chr9	72439300	72439500	200	210.471	4.28045	0.000372889	1	chip1_peak_2358
chr7	144380400	144380600	200	210.673	4.28457	0.000519528	1	chip1_peak_3325
chr12	56977800	56978000	200	210.716	4.28543	0.000371394	1	chip1_peak_2349
chr15	9121400	9121700	300	210.821	4.28758	0.000742798	1	chip1_peak_4889
chr18	84193300	84193500	200	210.828	4.28771	0.000416038	1	chip1_peak_2645
chr19	58400900	58401100	200	210.831	4.28777	0.000278651	1	chip1_peak_1765
chr2	7904200	7904400	200	210.837	4.28791	0.000377162	1	chip1_peak_2388
chr19	6843800	6844100	300	211.082	4.29287	0.000192823	1	chip1_peak_1207
chr9	122886100	122886300	200	211.101	4.29327	0.000248275	1	chip1_peak_1581
chr7	100561700	100561900	200	211.162	4.29451	0.000629524	1	chip1_peak_4107
chr19	58327800	58328000	200	211.231	4.29592	0.000813969	1	chip1_peak_5421
chr12	56439300	56439500	200	211.244	4.29617	0.000483639	1	chip1_peak_3081
chr19	42041200	42041400	200	211.259	4.29648	0.000490078	1	chip1_peak_3118
chr2	93718300	93718500	200	211.398	4.29932	0.000978466	1	chip1_peak_6662
chr16	34056300	34056500	200	211.403	4.29942	0.000568912	1	chip1_peak_3664
chr17	12516900	12517100	200	211.432	4.3	0.000626988	1	chip1_peak_4089
chr7	29347800	29348100	300	211.466	4.30069	0.000259904	1	chip1_peak_1649
chr8	17764900	17765100	200	211.475	4.30088	0.000865917	1	chip1_peak_5784
chr17	46142600	46142900	300	211.517	4.30174	3.68619e-05	1	chip1_peak_298
chr11	75693900	75694100	200	211.553	4.30246	0.000171038	1	chip1_peak_1077
chr18	68697600	68697900	300	211.71	4.30566	0.000589841	1	chip1_peak_3826
chr6	119435300	119435900	600	211.724	4.30594	1.56533e-05	0.778712	chip1_peak_168
chr13	113939700	113939900	200	211.841	4.30832	0.000546497	1	chip1_peak_3526
chr11	72402400	72402600	200	211.999	4.31153	0.000403716	1	chip1_peak_2555
chr12	81969100	81969400	300	212.036	4.31228	0.000661189	1	chip1_peak_4307
chr18	81821600	81821800	200	212.102	4.31364	0.000967531	1	chip1_peak_6575
chr9	35102200	35102400	200	212.134	4.31429	0.000401141	1	chip1_peak_2531
chr4	53933200	53933400	200	212.232	4.31628	0.000530036	1	chip1_peak_3401
chr3	58684100	58684400	300	212.237	4.31638	0.000318897	1	chip1_peak_2006
chr5	106991400	106991600	200	212.31	4.31787	6.61887e-05	1	chip1_peak_479
chr14	120310400	120310700	300	212.312	4.31791	0.000257739	1	chip1_peak_1637
chr1	185685600	185685800	200	212.368	4.31905	0.000460597	1	chip1_peak_2930
chr13	37775500	37775700	200	212.369	4.31905	0.000781692	1	chip1_peak_5189
chr19	43720000	43720200	200	212.499	4.3217	0.00054485	1	chip1_peak_3514
chr11	72056100	72056300	200	212.499	4.3217	0.000922258	1	chip1_peak_6224
chr11	20712200	20712400	200	212.525	4.32222	0.000558518	1	chip1_peak_3598
chr11	79240100	79240300	200	212.603	4.32382	0.000122486	1	chip1_peak_802
chr12	103986900	103987100	200	212.634	4.32445	0.000993118	1	chip1_peak_6772
chr11	59736100	59736300	200	212.701	4.3258	0.000204553	1	chip1_peak_1299
chr10	4236500	4236700	200	212.703	4.32586	0.000807224	1	chip1_peak_5387
chr9	61335300	61335500	200	212.708	4.32596	0.000210801	1	chip1_peak_1334
chr14	46781700	46781900	200	212.753	4.32687	0.000909399	1	chip1_peak_6128
chr6	146406800	146407000	200	212.911	4.33007	0.000260456	1	chip1_peak_1654
chr19	36962500	36962700	200	212.922	4.3303	0.00015962	1	chip1_peak_1006
chr16	23229800	23230000	200	212.935	4.33056	0.000995859	1	chip1_peak_6795
chr6	54311600	54311800	200	212.935	4.33056	0.000995859	1	chip1_peak_6796
chr12	33385500	33385700	200	212.959	4.33105	0.000897406	1	chip1_peak_6022
chr6	140744500	140744700	200	212.997	4.33184	0.000451258	1	chip1_peak_2860
chr9	103738100	103738400	300	213.015	4.33219	0.000202084	1	chip1_peak_1283
chr9	114831400	114831600	200	213.035	4.33259	0.000506152	1	chip1_peak_3231
chr2	180684000	180684200	200	213.08	4.33351	0.000983149	1	chip1_peak_6696
chr4	140619900	140620100	200	213.099	4.33391	0.000234026	1	chip1_peak_1501
chr1	93289500	93289700	200	213.114	4.3342	0.000392238	1	chip1_peak_2472
chr4	104791900	104792100	200	213.122	4.33437	0.000253388	1	chip1_peak_1613
chr19	46406900	46407100	200	213.127	4.33448	0.000137195	1	chip1_peak_895
chr6	128038800	128039000	200	213.148	4.3349	0.00094469	1	chip1_peak_6416
chr11	23261000	23261200	200	213.23	4.33657	0.000577387	1	chip1_peak_3720
chr18	84014200	84014500	300	213.234	4.33664	0.000311232	1	chip1_peak_1944
chr2	25651000	25651200	200	213.329	4.33858	0.000953107	1	chip1_peak_6476
chr3	95505800	95506000	200	213.336	4.33872	0.000187055	1	chip1_peak_1174
chr1	19389800	19390000	200	213.35	4.33901	0.00098488	1	chip1_peak_6706
chr15	11113000	11113200	200	213.365	4.33931	0.000648826	1	chip1_peak_4231
chr7	27922300	27922500	200	213.369	4.33939	0.000390673	1	chip1_peak_2462
chr19	40686600	40686800	200	213.474	4.34154	0.000448225	1	chip1_peak_2841
chr16	33462400	33462600	200	213.482	4.34168	0.000441897	1	chip1_peak_2802
chr13	113856000	113856200	200	213.518	4.34243	0.000560519	1	chip1_peak_3612
chr7	34664000	34664200	200	213.588	4.34385	0.00024322	1	chip1_peak_1555
chr7	29490200	29490400	200	213.612	4.34433	0.000255014	1	chip1_peak_1622
chr19	58281500	58281700	200	213.612	4.34433	0.00035222	1	chip1_peak_2229
chr4	139618100	139618300	200	213.612	4.34433	0.000407594	1	chip1_peak_2583
chr17	30231400	30231600	200	213.628	4.34466	0.000949263	1	chip1_peak_6443
chr6	84591700	84591900	200	213.628	4.34466	0.000949263	1	chip1_peak_6444
chr10	20119900	20120100	200	213.655	4.34521	0.000731775	1	chip1_peak_4810
chr2	91626000	91626200	200	213.694	4.34601	5.35448e-05	1	chip1_peak_403
chr7	37750000	37750200	200	213.782	4.34779	0.000296046	1	chip1_peak_1858
chr7	72307400	72307600	200	213.806	4.34828	0.000327541	1	chip1_peak_2070
chr11	8396400	8396600	200	213.906	4.35031	0.000939278	1	chip1_peak_6371
chr15	63718000	63718200	200	213.931	4.35082	0.000951889	1	chip1_peak_6468
chr15	31805900	31806100	200	213.931	4.35082	0.000965915	1	chip1_peak_6565
chr12	101954500	101954700	200	213.943	4.35107	0.00032551	1	chip1_peak_2052
chr7	75616700	75616900	200	213.96	4.35141	0.00096497	1	chip1_peak_6559
chr14	67781800	67782000	200	213.994	4.3521	5.30089e-05	1	chip1_peak_400
chr10	39020700	39020900	200	214.021	4.35264	0.000634001	1	chip1_peak_4138
chr1	82974100	82974300	200	214.08	4.35385	0.000900392	1	chip1_peak_6050
chr16	95915000	95915400	400	214.119	4.35465	0.00035865	1	chip1_peak_2269
chr2	86029000	86029300	300	214.121	4.35469	6.97794e-05	1	chip1_peak_503
chr16	91914300	91914700	400	214.124	4.35475	0.000158047	1	chip1_peak_1001
chr9	32038900	32039100	200	214.209	4.35648	0.000941878	1	chip1_peak_6390
chr11	53726600	53726800	200	214.232	4.35694	0.000948055	1	chip1_peak_6433
chr15	10567400	10567600	200	214.308	4.35849	0.00032713	1	chip1_peak_2066
chr3	28799000	28799300	300	214.326	4.35885	0.000601101	1	chip1_peak_3904
chr10	77949900	77950200	300	214.339	4.35913	0.000334813	1	chip1_peak_2112
chr5	122495700	122495900	200	214.374	4.35984	6.13328e-05	1	chip1_peak_452
chr2	52526300	52526600	300	214.423	4.36083	0.000341586	1	chip1_peak_2157
chr17	6026300	6026600	300	214.511	4.36261	6.08165e-05	1	chip1_peak_447
chr11	46232200	46232400	200	214.511	4.36262	0.000938087	1	chip1_peak_6365
chr10	41834200	41834400	200	214.552	4.36346	0.000892072	1	chip1_peak_5981
chr16	7232700	7233000	300	214.58	4.36401	0.000298611	1	chip1_peak_1871
chr14	31384000	31384200	200	214.593	4.36428	0.00019895	1	chip1_peak_1258
chr11	76662900	76663200	300	214.61	4.36463	0.000486907	1	chip1_peak_3101
chr2	102871800	102872000	200	214.662	4.36569	0.000932736	1	chip1_peak_6316
chr5	111686900	111687100	200	214.688	4.36622	0.000932809	1	chip1_peak_6318
chr4	100756600	100756800	200	214.695	4.36636	0.000368467	1	chip1_peak_2331
chr16	17423500	17423900	400	214.713	4.36673	8.0027e-05	1	chip1_peak_554
chr9	56579200	56579500	300	214.722	4.36691	0.00033101	1	chip1_peak_2088
chr5	35118700	35118900	200	214.813	4.36877	0.000934314	1	chip1_peak_6331
chr5	74947700	74947900	200	214.813	4.36877	0.000934314	1	chip1_peak_6332
chr8	119362300	119362500	200	214.813	4.36877	0.000934314	1	chip1_peak_6333
chr6	38794300	38794500	200	214.836	4.36923	0.000366181	1	chip1_peak_2314
chr11	109864600	109864900	300	214.903	4.37059	0.000261518	1	chip1_peak_1663
chr19	8781000	8781200	200	214.932	4.37119	0.000916398	1	chip1_peak_6177
chr3	99547200	99547400	200	214.932	4.37119	0.000916398	1	chip1_peak_6178
chr6	124279700	124280000	300	215.025	4.37307	0.000265902	1	chip1_peak_1691
chr19	8358700	8358900	200	215.026	4.3731	0.000477588	1	chip1_peak_3053
chr5	25402200	25402500	300	215.205	4.37673	0.00012694	1	chip1_peak_830
chr6	119558100	119558300	200	215.235	4.37734	0.000912717	1	chip1_peak_6147
chr2	12350100	12350300	200	215.235	4.37734	0.000912717	1	chip1_peak_6148
chr2	118691900	118692100	200	215.235	4.37734	0.000912717	1	chip1_peak_6149
chr5	148484700	148485000	300	215.236	4.37736	0.000213852	1	chip1_peak_1358
chr15	38306300	38306500	200	215.249	4.37764	0.000378113	1	chip1_peak_2395
chr19	47350700	47350900	200	215.323	4.37913	0.00098258	1	chip1_peak_6689
chr5	42904300	42904500	200	215.366	4.38001	0.000932525	1	chip1_peak_6313
chr19	10723800	10724000	200	215.514	4.38302	0.000903132	1	chip1_peak_6072
chr1	166285800	166286000	200	215.514	4.38302	0.000903132	1	chip1_peak_6073
chr4	140984200	140984400	200	215.562	4.384	0.000349048	1	chip1_peak_2209
chr19	38691200	38691400	200	215.614	4.38505	0.000452514	1	chip1_peak_2873
chr15	100131600	100131800	200	215.649	4.38577	0.000103685	1	chip1_peak_710
chr1	91122200	91122400	200	215.715	4.3871	0.000253224	1	chip1_peak_1612
chr13	66896500	66896700	200	215.72	4.38721	0.000401144	1	chip1_peak_2532
chr4	135233300	135233500	200	215.72	4.38721	0.000401144	1	chip1_peak_2533
chr13	108161600	108161800	200	215.776	4.38834	0.000348742	1	chip1_peak_2204
chr3	28010800	28011000	200	215.784	4.38851	0.000932784	1	chip1_peak_6317
chr19	16308800	16309000	200	215.793	4.38869	0.000893651	1	chip1_peak_5993
chr7	115255000	115255200	200	215.818	4.3892	0.000899509	1	chip1_peak_6035
chr9	96837900	96838100	200	215.818	4.3892	0.000899509	1	chip1_peak_6036
chr8	92225100	92225300	200	215.818	4.3892	0.000899509	1	chip1_peak_6037
chr17	5802800	5803100	300	215.847	4.3898	0.000509878	1	chip1_peak_3260
chr5	140566900	140567100	200	215.896	4.39078	0.000344349	1	chip1_peak_2175
chr18	90508300	90508600	300	215.901	4.39089	0.000908655	1	chip1_peak_6124
chr11	106377900	106378100	200	215.93	4.39148	0.000516625	1	chip1_peak_3306
chr12	69365100	69365300	200	215.962	4.39213	0.000396974	1	chip1_peak_2504
chr7	80614200	80614500	300	215.986	4.39261	0.000194342	1	chip1_peak_1218
chr7	60899300	60899500	200	216.034	4.39359	0.000791696	1	chip1_peak_5276
chr4	107567600	107567800	200	216.04	4.39372	5.39701e-05	1	chip1_peak_407
chr1	15585200	15585400	200	216.072	4.39437	0.000884273	1	chip1_peak_5918
chr5	45788000	45788200	200	216.097	4.39488	0.000890068	1	chip1_peak_5959
chr2	104753200	104753400	200	216.137	4.39568	0.000985112	1	chip1_peak_6708
chr14	60368000	60368300	300	216.238	4.39775	0.000611703	1	chip1_peak_3974
chr18	35185700	35186000	300	216.261	4.39821	0.00021612	1	chip1_peak_1377
chr6	117280900	117281100	200	216.294	4.39889	0.000292602	1	chip1_peak_1837
chr1	169963100	169963300	200	216.367	4.40037	0.000140735	1	chip1_peak_915
chr10	76556600	76556800	200	216.371	4.40044	0.000392946	1	chip1_peak_2477
chr8	128408200	128408400	200	216.384	4.40072	0.000564438	1	chip1_peak_3637
chr13	99716800	99717000	200	216.401	4.40107	0.000975018	1	chip1_peak_6634
chr19	46873000	46873200	200	216.45	4.40206	0.000824145	1	chip1_peak_5487
chr18	32230200	32230500	300	216.458	4.40222	0.00040542	1	chip1_peak_2569
chr11	16989300	16989700	400	216.475	4.40256	0.000209422	1	chip1_peak_1330
chr12	111072800	111073000	200	216.54	4.40387	0.000713327	1	chip1_peak_4680
chr2	134546700	134546900	200	216.543	4.40395	0.000875218	1	chip1_peak_5849
chr4	109360700	109360900	200	216.602	4.40515	0.000996864	1	chip1_peak_6806
chr6	29235000	29235200	200	216.684	4.40681	0.000890079	1	chip1_peak_5961
chr19	46315600	46315800	200	216.697	4.40707	0.000853963	1	chip1_peak_5699
chr5	41796300	41796500	200	216.758	4.40831	0.000991182	1	chip1_peak_6757
chr12	41581800	41582000	200	216.785	4.40887	0.000854315	1	chip1_peak_5701
chr1	89693400	89693600	200	216.808	4.40934	0.000879316	1	chip1_peak_5876
chr11	50672300	50672500	200	216.822	4.40963	0.00086604	1	chip1_peak_5785
chr2	132000300	132000500	200	216.916	4.41153	0.000992868	1	chip1_peak_6770
chr7	129761400	129761600	200	216.918	4.41157	0.00083774	1	chip1_peak_5588
chr7	110127600	110127800	200	217.009	4.41343	0.00028544	1	chip1_peak_1800
chr5	74947400	74947600	200	217.044	4.41414	0.000980773	1	chip1_peak_6674
chr10	126390700	126390900	200	217.071	4.41469	0.00098721	1	chip1_peak_6728
chr11	84252700	84252900	200	217.087	4.41501	0.000473516	1	chip1_peak_3022
chr6	98293600	98293800	200	217.088	4.41503	0.000543691	1	chip1_peak_3505
chrX	10291500	10291700	200	217.141	4.4161	0.000948671	1	chip1_peak_6439
chr9	116941800	116942000	200	217.196	4.41722	0.000828963	1	chip1_peak_5530
chr8	47334400	47334600	200	217.198	4.41728	0.000356626	1	chip1_peak_2256
chr2	28387200	28387400	200	217.232	4.41795	0.000697026	1	chip1_peak_4546
chr10	79826100	79826300	200	217.236	4.41803	0.000324752	1	chip1_peak_2043
chr13	50471200	50471400	200	217.242	4.41815	0.00032694	1	chip1_peak_2065
chr14	46972000	46972200	200	217.369	4.42075	0.000841984	1	chip1_peak_5620
chr1	180876800	180877000	200	217.369	4.42075	0.000841984	1	chip1_peak_5621
chr4	58577000	58577200	200	217.396	4.4213	0.000847499	1	chip1_peak_5659
chr9	107921500	107921700	200	217.396	4.4213	0.000888167	1	chip1_peak_5948
chr8	79052000	79052200	200	217.398	4.42133	0.000423434	1	chip1_peak_2704
chr14	24272200	24272500	300	217.399	4.42135	0.000628799	1	chip1_peak_4100
chr3	122173300	122173500	200	217.455	4.4225	0.000321469	1	chip1_peak_2020
chr1	139804800	139805100	300	217.469	4.42277	0.000459687	1	chip1_peak_2925
chr4	118392200	118392400	200	217.472	4.42284	0.00038694	1	chip1_peak_2435
chr14	86827400	86827600	200	217.501	4.42343	0.000825653	1	chip1_peak_5500
chr12	29358600	29358800	200	217.596	4.42536	0.000772018	1	chip1_peak_5105
chr18	64746600	64746800	200	217.633	4.4261	0.000959744	1	chip1_peak_6527
chr14	114007000	114007200	200	217.661	4.42668	0.000966042	1	chip1_peak_6567
chr3	127759900	127760100	200	217.661	4.42668	0.000966042	1	chip1_peak_6568
chr11	110041200	110041400	200	217.676	4.42698	0.000838622	1	chip1_peak_5597
chr19	47060900	47061100	200	217.676	4.42698	0.000838622	1	chip1_peak_5598
chr12	70470000	70470200	200	217.716	4.4278	0.000884376	1	chip1_peak_5920
chr2	128468800	128469000	200	217.816	4.42984	0.000960542	1	chip1_peak_6531
chr8	112502000	112502300	300	217.844	4.43041	0.000305314	1	chip1_peak_1905
chr16	24817200	24817500	300	217.934	4.43224	0.000260112	1	chip1_peak_1650
chr7	137817100	137817300	200	217.948	4.43251	0.000955907	1	chip1_peak_6493
chr8	35004400	35004600	200	217.948	4.43251	0.000955907	1	chip1_peak_6494
chr16	24426800	24427000	200	217.959	4.43273	0.000364242	1	chip1_peak_2303
chr5	96619000	96619300	300	217.961	4.43278	0.000335236	1	chip1_peak_2115
chr16	96384700	96384900	200	218.017	4.43392	0.000914111	1	chip1_peak_6161
chrX	13350000	13350200	200	218.065	4.43491	0.000813962	1	chip1_peak_5420
chr12	79446100	79446400	300	218.074	4.43508	0.000260438	1	chip1_peak_1653
chr9	111248400	111248600	200	218.093	4.43548	0.000819292	1	chip1_peak_5457
chr1	7175900	7176200	300	218.142	4.43646	9.05068e-05	1	chip1_peak_634
chr5	148974900	148975200	300	218.22	4.43806	0.000227247	1	chip1_peak_1457
chr17	45991800	45992000	200	218.225	4.43816	0.000883375	1	chip1_peak_5912
chr5	25472000	25472200	200	218.372	4.44115	0.000810718	1	chip1_peak_5405
chr14	59738400	59738600	200	218.401	4.44173	0.000816026	1	chip1_peak_5435
chr11	51287700	51287900	200	218.435	4.44243	0.000943199	1	chip1_peak_6403
chr19	32190900	32191100	200	218.445	4.44263	0.000468945	1	chip1_peak_2992
chr19	6087300	6087500	200	218.45	4.44273	0.000903811	1	chip1_peak_6077
chr15	3551000	3551200	200	218.688	4.44756	0.000828119	1	chip1_peak_5525
chr11	33747500	33747700	200	218.692	4.44766	0.000930112	1	chip1_peak_6295
chr3	104305900	104306100	200	218.71	4.44802	0.000483632	1	chip1_peak_3080
chr11	83790400	83790600	200	218.808	4.45001	0.000303036	1	chip1_peak_1893
chr8	41190500	41190700	200	218.854	4.45095	0.000664521	1	chip1_peak_4330
chr8	122623700	122623900	200	218.911	4.4521	0.000440303	1	chip1_peak_2792
chr2	166973600	166973800	200	218.917	4.45222	0.000317095	1	chip1_peak_1993
chr4	104728900	104729100	200	218.96	4.45309	0.000799044	1	chip1_peak_5326
chr19	37998400	37998600	200	218.966	4.45322	0.00058911	1	chip1_peak_3821
chr14	67877900	67878100	200	218.979	4.45349	0.000920367	1	chip1_peak_6210
chr4	108904700	108904900	200	218.979	4.45349	0.000920367	1	chip1_peak_6211
chr9	56436000	56436300	300	219.066	4.45526	0.000351148	1	chip1_peak_2221
chr6	118773100	118773300	200	219.078	4.45549	0.000303876	1	chip1_peak_1898
chr11	86398700	86398900	200	219.14	4.45677	0.000257558	1	chip1_peak_1634
chr16	5312900	5313100	200	219.185	4.45767	0.000262802	1	chip1_peak_1671
chr8	117238900	117239100	200	219.266	4.45933	0.000910727	1	chip1_peak_6137
chr12	71853100	71853400	300	219.307	4.46016	0.000417586	1	chip1_peak_2663
chr4	8789300	8789600	300	219.372	4.46149	0.000164917	1	chip1_peak_1039
chr3	115750800	115751000	200	219.396	4.46197	0.000893051	1	chip1_peak_5987
chr7	132080700	132080900	200	219.406	4.46218	0.00089914	1	chip1_peak_6033
chr12	17344100	17344300	200	219.584	4.46579	0.000905103	1	chip1_peak_6084
chr10	18922800	18923000	200	219.591	4.46593	0.000535542	1	chip1_peak_3438
chr11	79119400	79119600	200	219.623	4.46659	0.000588524	1	chip1_peak_3811
chr15	10251400	10251600	200	219.685	4.46784	0.000777549	1	chip1_peak_5147
chr5	35186800	35187000	200	219.685	4.46784	0.000777549	1	chip1_peak_5148
chr18	78111100	78111300	200	219.702	4.4682	0.000981159	1	chip1_peak_6678
chr2	49323500	49323800	300	219.778	4.46974	0.000496211	1	chip1_peak_3165
chr18	9822400	9822600	200	219.849	4.47118	0.00043923	1	chip1_peak_2784
chr17	33770000	33770200	200	219.877	4.47174	0.000442086	1	chip1_peak_2803
chr8	83283400	83283600	200	219.949	4.47321	0.000850894	1	chip1_peak_5676
chr15	97495300	97495500	200	219.984	4.47393	0.00087396	1	chip1_peak_5840
chr9	51381100	51381300	200	220.012	4.47449	0.00073949	1	chip1_peak_4867
chr16	8468800	8469000	200	220.123	4.47675	0.000463447	1	chip1_peak_2949
chr8	75267000	75267200	200	220.22	4.47873	0.000998324	1	chip1_peak_6814
chr1	75670600	75670800	200	220.228	4.47888	0.000873171	1	chip1_peak_5834
chr13	24587700	24587900	200	220.233	4.47899	0.000377949	1	chip1_peak_2394
chr11	79780300	79780500	200	220.233	4.47899	0.000907392	1	chip1_peak_6112
chr13	21184300	21184500	200	220.281	4.47997	0.000907216	1	chip1_peak_6110
chr2	38722900	38723200	300	220.325	4.48085	0.000945072	1	chip1_peak_6419
chr14	45606900	45607100	200	220.347	4.48132	0.000746845	1	chip1_peak_4919
chr2	132605700	132605900	200	220.351	4.4814	0.000741378	1	chip1_peak_4882
chr7	30224000	30224200	200	220.365	4.48168	0.000842527	1	chip1_peak_5628
chr13	40852800	40853000	200	220.43	4.48299	0.000635969	1	chip1_peak_4148
chr16	78338900	78339100	200	220.441	4.48321	0.000956965	1	chip1_peak_6506
chr4	145051500	145051700	200	220.495	4.48431	0.000247843	1	chip1_peak_1578
chr13	42651100	42651300	200	220.6	4.48646	0.000867258	1	chip1_peak_5796
chr7	98910500	98910700	200	220.6	4.48646	0.000867258	1	chip1_peak_5797
chr6	125696900	125697100	200	220.6	4.48646	0.000867258	1	chip1_peak_5798
chr13	111753900	111754100	200	220.63	4.48706	0.000978561	1	chip1_peak_6663
chr13	40970500	40970700	200	220.641	4.48729	0.000738632	1	chip1_peak_4859
chr7	97405800	97406000	200	220.641	4.48729	0.000738632	1	chip1_peak_4860
chr6	83393500	83393800	300	220.76	4.48971	0.000466954	1	chip1_peak_2974
chr16	87397900	87398100	200	220.798	4.49047	0.000265839	1	chip1_peak_1690
chr9	88242900	88243100	200	220.798	4.49047	0.000266817	1	chip1_peak_1698
chr1	91121800	91122100	300	220.812	4.49077	0.000606533	1	chip1_peak_3944
chr9	65936800	65937000	200	220.876	4.49206	0.000389375	1	chip1_peak_2456
chr16	44348200	44348400	200	220.944	4.49346	0.000659763	1	chip1_peak_4299
chr8	61032500	61032700	200	220.969	4.49395	0.000740943	1	chip1_peak_4878
chr12	31392100	31392300	200	220.984	4.49426	0.000740522	1	chip1_peak_4875
chr10	39620400	39620600	200	220.984	4.49426	0.000740522	1	chip1_peak_4876
chr15	71980500	71980700	200	221.013	4.49485	0.000841554	1	chip1_peak_5617
chr15	10584800	10585000	200	221.241	4.4995	0.000274287	1	chip1_peak_1743
chr16	86877400	86877600	200	221.256	4.49979	0.000978284	1	chip1_peak_6660
chr7	141159500	141159700	200	221.263	4.49994	0.0007328	1	chip1_peak_4819
chr6	125534500	125534700	200	221.263	4.49994	0.0007328	1	chip1_peak_4820
chr7	57422200	57422400	200	221.269	4.50006	0.000276063	1	chip1_peak_1759
chr8	3176900	3177200	300	221.428	4.50329	0.000370772	1	chip1_peak_2347
chr9	122809000	122809200	200	221.478	4.50431	0.000692633	1	chip1_peak_4525
chr8	48777200	48777400	200	221.543	4.50563	0.000725161	1	chip1_peak_4757
chr15	57662600	57662800	200	221.598	4.50675	0.000829682	1	chip1_peak_5535
chr3	41476700	41476900	200	221.632	4.50744	0.000835119	1	chip1_peak_5571
chr8	30252700	30252900	200	221.632	4.50744	0.000835119	1	chip1_peak_5572
chr2	72764100	72764300	200	221.69	4.50862	0.000802387	1	chip1_peak_5349
chr1	106663100	106663300	200	221.69	4.50862	0.000852836	1	chip1_peak_5691
chr5	89020500	89020700	200	221.726	4.50936	0.000962003	1	chip1_peak_6542
chr3	98329700	98330100	400	221.841	4.51169	2.76146e-05	0.977685	chip1_peak_251
chr10	107277500	107277700	200	221.865	4.51219	0.000352893	1	chip1_peak_2234
chr11	102891900	102892100	200	221.885	4.51258	0.000821022	1	chip1_peak_5468
chr11	23144500	23144700	200	221.919	4.51328	0.000826401	1	chip1_peak_5507
chr8	126463100	126463300	200	221.919	4.51328	0.000826401	1	chip1_peak_5508
chr12	77948900	77949100	200	221.921	4.51333	0.000703906	1	chip1_peak_4600
chr2	152590300	152590500	200	221.964	4.51419	9.98572e-05	1	chip1_peak_690
chr12	17037100	17037300	200	222.021	4.51535	0.000951943	1	chip1_peak_6470
chr19	56018400	56018600	200	222.041	4.51577	0.000810389	1	chip1_peak_5401
chr2	117569700	117569900	200	222.065	4.51626	0.000582973	1	chip1_peak_3755
chr3	31124500	31124700	200	222.126	4.5175	0.000786389	1	chip1_peak_5226
chr14	79501600	79501800	200	222.21	4.51919	0.000305814	1	chip1_peak_1909
chr18	76033600	76033800	200	222.234	4.51968	0.00070113	1	chip1_peak_4574
chr6	7125900	7126100	200	222.234	4.51968	0.00070113	1	chip1_peak_4575
chr14	12677600	12677800	200	222.313	4.5213	0.000754792	1	chip1_peak_4980
chr10	95442700	95442900	200	222.385	4.52275	0.000911186	1	chip1_peak_6138
chr9	77230200	77230400	200	222.494	4.52497	0.000740321	1	chip1_peak_4873
chr14	73161000	73161400	400	222.59	4.52693	0.000207966	1	chip1_peak_1318
chr2	69137200	69137400	200	222.594	4.527	0.000271726	1	chip1_peak_1728
chr4	140639400	140639600	200	222.627	4.52767	0.000931617	1	chip1_peak_6304
chr4	77237300	77237500	200	222.629	4.52772	0.000793122	1	chip1_peak_5284
chr2	145157700	145157900	200	222.645	4.52804	0.000685042	1	chip1_peak_4483
chr11	72735000	72735200	200	222.664	4.52842	0.00080421	1	chip1_peak_5362
chr8	117589400	117589600	200	222.692	4.529	0.000635602	1	chip1_peak_4144
chr4	45608900	45609100	200	222.778	4.53074	0.000753015	1	chip1_peak_4967
chr11	68493700	68493900	200	222.784	4.53087	0.000788636	1	chip1_peak_5245
chr2	23192900	23193100	200	222.845	4.53211	0.000449441	1	chip1_peak_2850
chr11	61669400	61669700	300	222.886	4.53294	0.000338735	1	chip1_peak_2143
chr11	65515900	65516100	200	222.915	4.53354	0.000826541	1	chip1_peak_5510
chr5	24812600	24812800	200	222.92	4.53363	0.000573695	1	chip1_peak_3694
chr2	102739600	102739800	200	222.92	4.53363	0.000890465	1	chip1_peak_5967
chr8	123446600	123446800	200	222.92	4.53363	0.000947465	1	chip1_peak_6428
chr15	53301000	53301200	200	222.922	4.53367	0.000921885	1	chip1_peak_6221
chr1	100817500	100817700	200	222.93	4.53384	0.000790199	1	chip1_peak_5260
chr6	121464900	121465100	200	222.93	4.53384	0.000792626	1	chip1_peak_5281
chr6	31786600	31786900	300	222.941	4.53406	0.0007238	1	chip1_peak_4746
chr18	33332400	33332600	200	222.944	4.53412	0.000254599	1	chip1_peak_1620
chr18	35359400	35359600	200	222.944	4.53412	0.000254599	1	chip1_peak_1621
chr6	37231300	37231500	200	222.95	4.53425	0.000392129	1	chip1_peak_2470
chr4	47366000	47366200	200	222.95	4.53425	0.000623766	1	chip1_peak_4062
chr10	76437200	76437400	200	222.999	4.53525	0.000764654	1	chip1_peak_5065
chr11	83807300	83807500	200	223.045	4.53617	0.000904	1	chip1_peak_6080
chr2	45068100	45068400	300	223.159	4.5385	4.16957e-05	1	chip1_peak_329
chr2	39168900	39169200	300	223.181	4.53895	0.00024749	1	chip1_peak_1575
chr6	39984200	39984400	200	223.217	4.53967	0.000781964	1	chip1_peak_5195
chr10	76633500	76633700	200	223.237	4.54009	0.000675248	1	chip1_peak_4412
chr18	42228900	42229100	200	223.253	4.54041	0.000787085	1	chip1_peak_5232
chr18	56483700	56483900	200	223.392	4.54324	0.000906575	1	chip1_peak_6100
chr19	10353200	10353400	200	223.46	4.54463	0.000250858	1	chip1_peak_1598
chr2	85196700	85196900	200	223.486	4.54515	0.000725943	1	chip1_peak_4763
chr5	32285900	32286100	200	223.531	4.54607	0.000667849	1	chip1_peak_4351
chr2	141894300	141894500	200	223.531	4.54607	0.000667849	1	chip1_peak_4352
chr19	38913200	38913400	200	223.54	4.54624	0.000778885	1	chip1_peak_5158
chr9	31293500	31293700	200	223.54	4.54624	0.000778885	1	chip1_peak_5159
chr4	139737200	139737400	200	223.552	4.54649	0.000672595	1	chip1_peak_4395
chr5	114117200	114117400	200	223.565	4.54676	0.000107181	1	chip1_peak_737
chr15	58818900	58819200	300	223.586	4.54719	0.000457405	1	chip1_peak_2908
chr1	171977300	171977500	200	223.588	4.54721	0.000504624	1	chip1_peak_3221
chr5	77179000	77179200	200	223.633	4.54813	0.00088523	1	chip1_peak_5932
chr8	93732300	93732500	200	223.658	4.54865	0.00076381	1	chip1_peak_5059
chr15	71553300	71553500	200	223.732	4.55015	0.000868291	1	chip1_peak_5807
chr9	103280100	103280300	200	223.75	4.55052	2.05692e-05	0.891438	chip1_peak_196
chr11	3511100	3511300	200	223.924	4.55406	0.000648141	1	chip1_peak_4221
chr6	54687400	54687600	200	223.944	4.55447	0.000755858	1	chip1_peak_4988
chr6	98376200	98376400	200	223.944	4.55447	0.000755858	1	chip1_peak_4989
chr4	152552100	152552300	200	223.96	4.55479	0.000761002	1	chip1_peak_5034
chr14	29770000	29770200	200	223.982	4.55523	0.000887756	1	chip1_peak_5944
chr15	103537400	103537700	300	224.038	4.55638	0.00014715	1	chip1_peak_949
chr4	132003500	132003700	200	224.045	4.55651	0.000242647	1	chip1_peak_1553
chr12	77794400	77794600	200	224.089	4.55742	0.000973997	1	chip1_peak_6630
chr3	132858600	132858800	200	224.126	4.55816	0.000658314	1	chip1_peak_4288
chr5	60649800	60650000	200	224.166	4.55898	0.000637245	1	chip1_peak_4156
chr13	38734200	38734400	200	224.219	4.56005	0.000645765	1	chip1_peak_4209
chr11	74560500	74560700	200	224.23	4.56028	0.000907127	1	chip1_peak_6108
chr8	106609200	106609400	200	224.24	4.56049	0.000650353	1	chip1_peak_4238
chr7	141066100	141066300	200	224.247	4.56062	0.00076198	1	chip1_peak_5042
chr5	53450700	53450900	200	224.277	4.56123	0.000878498	1	chip1_peak_5869
chr2	102141900	102142100	200	224.285	4.56139	0.000758013	1	chip1_peak_5004
chr14	79397300	79397500	200	224.296	4.56162	0.000256679	1	chip1_peak_1628
chr2	100370300	100370500	200	224.313	4.56196	0.000241705	1	chip1_peak_1546
chr15	77135000	77135200	200	224.396	4.56365	0.00086147	1	chip1_peak_5753
chr1	39347000	39347200	200	224.401	4.56375	0.000743348	1	chip1_peak_4891
chr13	36174300	36174500	200	224.412	4.56398	0.000208114	1	chip1_peak_1319
chr2	28412100	28412500	400	224.447	4.56469	0.000361768	1	chip1_peak_2286
chr16	91521700	91521900	200	224.55	4.56678	0.000239221	1	chip1_peak_1531
chr14	24209200	24209400	200	224.609	4.56798	0.00098763	1	chip1_peak_6734
chr10	31215500	31215700	200	224.69	4.56963	0.000852493	1	chip1_peak_5688
chr2	181196100	181196300	200	224.743	4.57072	0.000309552	1	chip1_peak_1931
chr4	43138000	43138200	200	224.747	4.5708	0.000863934	1	chip1_peak_5770
chr5	44237200	44237400	200	224.858	4.57306	0.000742324	1	chip1_peak_4888
chr8	76958200	76958400	200	224.916	4.57424	0.000857359	1	chip1_peak_5720
chr6	88235700	88235900	200	224.99	4.57574	0.000732921	1	chip1_peak_4824
chr14	77395200	77395400	200	225	4.57594	0.000843135	1	chip1_peak_5632
chr19	12774600	12774800	200	225	4.57594	0.000843135	1	chip1_peak_5633
chr2	181424000	181424300	300	225.017	4.57629	0.000282554	1	chip1_peak_1784
chr5	92451700	92451900	200	225.067	4.5773	0.00027068	1	chip1_peak_1722
chr9	100433900	100434100	200	225.068	4.57732	0.000585038	1	chip1_peak_3773
chr1	76847100	76847300	200	225.13	4.57859	0.000634068	1	chip1_peak_4139
chr3	107490500	107490700	200	225.175	4.57949	0.000227384	1	chip1_peak_1459
chr18	32324600	32324800	200	225.192	4.57984	0.000971268	1	chip1_peak_6607
chr2	78436400	78436600	200	225.192	4.57984	0.000971268	1	chip1_peak_6608
chr2	102042000	102042200	200	225.192	4.57984	0.000971268	1	chip1_peak_6609
chr8	113050300	113050600	300	225.234	4.58071	0.000250017	1	chip1_peak_1591
chr1	159230500	159230700	200	225.277	4.58157	0.000725303	1	chip1_peak_4758
chr1	40256300	40256500	200	225.286	4.58177	0.00041559	1	chip1_peak_2643
chr7	109011000	109011200	200	225.316	4.58237	0.00073005	1	chip1_peak_4789
chr7	116897700	116897900	200	225.337	4.58279	0.00084603	1	chip1_peak_5652
chr6	48547000	48547200	200	225.34	4.58286	0.000309773	1	chip1_peak_1934
chr9	63344800	63345100	300	225.394	4.58396	0.000519207	1	chip1_peak_3323
chr8	95185600	95185800	200	225.496	4.58603	0.000880187	1	chip1_peak_5888
chr2	148529600	148529800	200	225.563	4.5874	0.000717767	1	chip1_peak_4705
chr14	11687900	11688100	200	225.586	4.58786	0.000225092	1	chip1_peak_1440
chr5	99592500	99592700	200	225.619	4.58853	0.0007934	1	chip1_peak_5287
chr9	74712500	74712700	200	225.627	4.5887	0.000788515	1	chip1_peak_5241
chr1	170375600	170375900	300	225.727	4.59073	0.000216906	1	chip1_peak_1380
chr15	86919700	86919900	200	225.793	4.59206	0.000946669	1	chip1_peak_6427
chr16	23424800	23425000	200	225.814	4.59249	0.000463614	1	chip1_peak_2951
chr1	28751800	28752000	200	225.865	4.59354	0.00070991	1	chip1_peak_4649
chr6	37452100	37452300	200	225.889	4.59401	0.000406515	1	chip1_peak_2573
chr15	83970300	83970500	200	226.002	4.59631	0.000701142	1	chip1_peak_4576
chr5	84416200	84416400	200	226.057	4.59744	0.000865555	1	chip1_peak_5782
chr14	118592500	118592700	200	226.111	4.59853	0.000606438	1	chip1_peak_3941
chrX	52137900	52138100	200	226.126	4.59883	0.000627243	1	chip1_peak_4091
chr16	24045000	24045200	200	226.135	4.59902	0.000610743	1	chip1_peak_3967
chr13	43506700	43506900	200	226.192	4.60019	0.000707137	1	chip1_peak_4629
chr9	70754500	70754700	200	226.192	4.60019	0.000881437	1	chip1_peak_5901
chr17	7271900	7272100	200	226.279	4.60195	0.00093535	1	chip1_peak_6345
chr15	77353200	77353500	300	226.291	4.60219	0.000265822	1	chip1_peak_1688
chr6	121786900	121787100	200	226.413	4.60468	0.000814343	1	chip1_peak_5424
chr6	144937600	144937800	200	226.414	4.6047	0.000604415	1	chip1_peak_3928
chr5	7984200	7984500	300	226.429	4.60499	0.000328792	1	chip1_peak_2076
chr18	38728400	38728600	200	226.457	4.60557	0.000584763	1	chip1_peak_3769
chr10	27656400	27656600	200	226.497	4.60638	0.000588581	1	chip1_peak_3812
chr11	98378400	98378600	200	226.511	4.60667	0.000211343	1	chip1_peak_1338
chr10	100484500	100484700	200	226.582	4.6081	0.000925608	1	chip1_peak_6256
chr5	97383500	97383700	200	226.628	4.60906	0.000862117	1	chip1_peak_5759
chr5	114329200	114329400	200	226.709	4.61069	0.000597818	1	chip1_peak_3880
chr11	68805800	68806000	200	226.896	4.61449	0.000683776	1	chip1_peak_4474
chr12	71577900	71578100	200	226.896	4.61449	0.000742871	1	chip1_peak_4890
chr2	102434700	102434900	200	226.922	4.61502	0.000688639	1	chip1_peak_4509
chr15	38606200	38606400	200	226.937	4.61534	0.00068825	1	chip1_peak_4507
chr15	51897700	51897900	200	226.988	4.61637	0.000710781	1	chip1_peak_4662
chr3	27502300	27502500	200	226.99	4.61641	0.000605097	1	chip1_peak_3935
chr3	102269900	102270100	200	227.003	4.61667	0.000797502	1	chip1_peak_5313
chr8	63861500	63861800	300	227.07	4.61804	0.000157269	1	chip1_peak_993
chr3	107755500	107755700	200	227.139	4.61945	0.000588305	1	chip1_peak_3809
chr15	64120400	64120600	200	227.143	4.61953	0.000255688	1	chip1_peak_1627
chr7	30943200	30943500	300	227.16	4.61986	0.000621862	1	chip1_peak_4044
chr11	6351100	6351300	200	227.182	4.62032	0.000676686	1	chip1_peak_4426
chr4	107363600	107363800	200	227.182	4.62032	0.000676686	1	chip1_peak_4427
chr8	91702600	91702800	200	227.182	4.62032	0.000676686	1	chip1_peak_4428
chr16	14146900	14147100	200	227.215	4.62099	0.000213029	1	chip1_peak_1354
chr11	96337700	96337900	200	227.224	4.62117	0.000681113	1	chip1_peak_4459
chr17	45604900	45605100	200	227.224	4.62117	0.000681113	1	chip1_peak_4460
chr4	88335600	88335800	200	227.224	4.62117	0.000681113	1	chip1_peak_4461
chr2	166017700	166017900	200	227.274	4.62219	3.29724e-05	1	chip1_peak_279
chr6	8456800	8457000	200	227.415	4.62505	0.000559642	1	chip1_peak_3607
chr12	113065800	113066000	200	227.459	4.62595	0.000178907	1	chip1_peak_1133
chr6	8559300	8559500	200	227.469	4.62614	0.000669672	1	chip1_peak_4363
chr11	106742000	106742200	200	227.469	4.62614	0.000973508	1	chip1_peak_6629
chr5	35619000	35619200	200	227.511	4.62701	0.000674053	1	chip1_peak_4403
chr4	100360200	100360400	200	227.511	4.62701	0.000674053	1	chip1_peak_4404
chr1	84776700	84776900	200	227.511	4.62701	0.000674053	1	chip1_peak_4405
chr2	48974000	48974200	200	227.57	4.62822	0.000631243	1	chip1_peak_4122
chr4	58506900	58507100	200	227.599	4.6288	0.000843292	1	chip1_peak_5636
chr19	32119200	32119400	200	227.63	4.62943	0.000568423	1	chip1_peak_3661
chr6	67245700	67245900	200	227.665	4.63013	0.000107869	1	chip1_peak_738
chr2	165001100	165001400	300	227.707	4.631	0.000425907	1	chip1_peak_2715
chr5	106528700	106528900	200	227.713	4.63112	0.00057587	1	chip1_peak_3706
chr11	32733300	32733600	300	227.75	4.63187	0.000298127	1	chip1_peak_1867
chr6	35377200	35377400	200	227.768	4.63223	0.000776184	1	chip1_peak_5134
chr11	78430200	78430400	200	227.795	4.63278	0.000206083	1	chip1_peak_1309
chr15	96712200	96712400	200	227.915	4.63523	0.0006835	1	chip1_peak_4471
chr16	26062600	26062800	200	227.917	4.63527	0.000595095	1	chip1_peak_3866
chr2	134846200	134846400	200	227.969	4.63632	0.000662945	1	chip1_peak_4321
chr3	132132600	132132800	200	227.971	4.63636	0.000882171	1	chip1_peak_5909
chr14	17760900	17761100	200	228.009	4.63713	0.000222967	1	chip1_peak_1422
chr16	23011300	23011500	200	228.035	4.63767	0.000140413	1	chip1_peak_913
chr11	22993900	22994100	200	228.044	4.63785	0.000617284	1	chip1_peak_4010
chr18	70601600	70601800	200	228.063	4.63823	0.000768129	1	chip1_peak_5085
chr11	55248100	55248300	200	228.171	4.64043	0.000753276	1	chip1_peak_4969
chr15	39831700	39831900	200	228.212	4.64127	0.000651817	1	chip1_peak_4250
chr1	45354600	45354800	200	228.391	4.64491	0.000735377	1	chip1_peak_4837
chr14	23839300	23839500	200	228.531	4.64774	0.00062408	1	chip1_peak_4065
chr11	115371500	115371700	200	228.592	4.64899	0.000909421	1	chip1_peak_6129
chr4	22448200	22448400	200	228.625	4.64967	0.000903562	1	chip1_peak_6076
chr8	91707200	91707400	200	228.647	4.65011	0.000937204	1	chip1_peak_6359
chr6	38448500	38448700	200	228.845	4.65414	0.000929966	1	chip1_peak_6292
chr7	111633900	111634100	200	228.877	4.65478	0.000226632	1	chip1_peak_1452
chr12	109571900	109572100	200	228.933	4.65592	0.000630172	1	chip1_peak_4112
chr10	26191800	26192000	200	229.069	4.6587	0.000989339	1	chip1_peak_6744
chr13	51730800	51731000	200	229.132	4.65998	0.000517228	1	chip1_peak_3308
chr2	152835000	152835200	200	229.235	4.66206	0.00080691	1	chip1_peak_5382
chr1	150272000	150272200	200	229.248	4.66233	0.000583152	1	chip1_peak_3757
chr11	5468100	5468300	200	229.248	4.66233	0.000746222	1	chip1_peak_4917
chr1	138277100	138277300	200	229.329	4.66399	0.000834891	1	chip1_peak_5569
chr7	79163200	79163400	200	229.36	4.66462	0.000222018	1	chip1_peak_1416
chr11	121418900	121419100	200	229.371	4.66484	0.000257875	1	chip1_peak_1638
chr17	70653400	70653600	200	229.377	4.66496	0.00084037	1	chip1_peak_5607
chr18	21143300	21143500	200	229.521	4.66788	0.000616862	1	chip1_peak_4006
chr18	43042400	43042600	200	229.521	4.66788	0.000616862	1	chip1_peak_4007
chr10	60919700	60919900	200	229.527	4.66801	0.000872162	1	chip1_peak_5830
chr7	88473500	88473700	200	229.544	4.66836	0.000621051	1	chip1_peak_4039
chr12	41473200	41473400	200	229.59	4.66928	0.000639205	1	chip1_peak_4168
chr9	80204300	80204500	200	229.631	4.67013	0.00082623	1	chip1_peak_5506
chr11	110074900	110075100	200	229.679	4.6711	0.000831651	1	chip1_peak_5544
chr9	23357900	23358100	200	229.679	4.6711	0.000831651	1	chip1_peak_5545
chr6	126120900	126121100	200	229.729	4.67211	0.00072422	1	chip1_peak_4752
chr5	140074400	140074600	200	229.763	4.6728	0.000943137	1	chip1_peak_6401
chr17	31730000	31730200	200	229.831	4.67419	0.000614633	1	chip1_peak_3990
chr7	125760500	125760700	200	229.831	4.67419	0.000614633	1	chip1_peak_3991
chr4	135112200	135112400	200	229.851	4.67459	0.000985843	1	chip1_peak_6716
chr7	67559900	67560100	200	229.9	4.6756	0.000456435	1	chip1_peak_2899
chr5	28302200	28302400	200	229.903	4.67566	0.000220379	1	chip1_peak_1406
chr2	169885300	169885500	200	229.927	4.67615	0.000521797	1	chip1_peak_3340
chr16	70769100	70769300	200	229.927	4.67615	0.000820928	1	chip1_peak_5467
chr4	53837600	53837800	200	229.958	4.67678	0.000862793	1	chip1_peak_5762
chr11	110068600	110068800	200	229.972	4.67706	0.000525202	1	chip1_peak_3367
chr8	105674300	105674500	200	230.009	4.6778	0.000217627	1	chip1_peak_1386
chr8	67694500	67694700	200	230.115	4.67996	2.1134e-05	0.896405	chip1_peak_201
chr1	171007000	171007200	200	230.117	4.68001	0.000893535	1	chip1_peak_5992
chr12	4347600	4347800	200	230.117	4.68001	0.000901717	1	chip1_peak_6058
chr11	77906700	77906900	200	230.126	4.6802	0.00070288	1	chip1_peak_4588
chr10	5564600	5564900	300	230.144	4.68056	0.000943711	1	chip1_peak_6408
chr10	84336200	84336400	200	230.164	4.68096	0.000612261	1	chip1_peak_3978
chr15	85240500	85240800	300	230.181	4.68131	0.000514944	1	chip1_peak_3291
chr9	67826900	67827100	200	230.206	4.68182	0.000516418	1	chip1_peak_3303
chr1	187530800	187531000	200	230.251	4.68273	0.000519787	1	chip1_peak_3328
chr1	178664700	178664900	200	230.284	4.6834	0.000515482	1	chip1_peak_3295
chr19	47270900	47271200	300	230.289	4.68351	0.00026412	1	chip1_peak_1681
chr15	77585500	77585700	200	230.296	4.68365	0.000523179	1	chip1_peak_3353
chr4	128089300	128089500	200	230.296	4.68365	0.000523179	1	chip1_peak_3354
chr2	24655300	24655500	200	230.415	4.68606	0.000804182	1	chip1_peak_5361
chr10	101493300	101493500	200	230.451	4.68679	0.000605938	1	chip1_peak_3939
chr14	30701500	30701700	200	230.57	4.68923	0.000110865	1	chip1_peak_753
chr3	36957400	36957600	200	230.574	4.68931	0.000598294	1	chip1_peak_3881
chr8	124611700	124611900	200	230.58	4.68943	0.000501264	1	chip1_peak_3195
chr9	42647400	42647600	200	230.664	4.69112	0.000330813	1	chip1_peak_2087
chr2	45807800	45808000	200	230.696	4.69179	0.000511267	1	chip1_peak_3270
chr1	91039900	91040100	200	230.709	4.69204	0.000976388	1	chip1_peak_6643
chr3	111268900	111269100	200	230.766	4.69321	0.000801072	1	chip1_peak_5343
chr3	36639700	36639900	200	230.855	4.69502	0.000512452	1	chip1_peak_3276
chr2	28173900	28174100	200	230.861	4.69514	0.00059212	1	chip1_peak_3840
chr7	109445600	109445800	200	230.908	4.6961	0.00059599	1	chip1_peak_3872
chr7	19839300	19839600	300	230.943	4.69681	0.000529311	1	chip1_peak_3395
chr5	45538600	45538800	200	231.017	4.69831	0.000569602	1	chip1_peak_3669
chr4	150026700	150026900	200	231.022	4.6984	0.000509302	1	chip1_peak_3254
chr6	25299100	25299400	300	231.024	4.69846	0.000617029	1	chip1_peak_4009
chr11	22918700	22918900	200	231.183	4.7017	0.000677099	1	chip1_peak_4432
chr3	76044900	76045100	200	231.195	4.70194	0.000589841	1	chip1_peak_3827
chr14	22818200	22818600	400	231.206	4.70214	0.000652306	1	chip1_peak_4254
chr9	34843200	34843400	200	231.254	4.70314	0.000500791	1	chip1_peak_3188
chr11	79868600	79868800	200	231.273	4.70351	0.000864876	1	chip1_peak_5775
chr5	144203500	144203800	300	231.343	4.70494	0.000472917	1	chip1_peak_3017
chr12	111242900	111243200	300	231.375	4.70558	0.000362914	1	chip1_peak_2291
chr14	87069400	87069600	200	231.395	4.70599	0.000753504	1	chip1_peak_4971
chr1	176232100	176232400	300	231.448	4.70708	0.000584763	1	chip1_peak_3770
chr7	117103200	117103400	200	231.449	4.7071	0.000561121	1	chip1_peak_3616
chr6	83625700	83625900	200	231.471	4.70754	0.000822041	1	chip1_peak_5474
chr18	38840400	38840600	200	231.548	4.7091	0.000661509	1	chip1_peak_4311
chr8	41356200	41356400	200	231.578	4.70972	0.000572514	1	chip1_peak_3686
chr2	19562200	19562400	200	231.596	4.71009	0.000201915	1	chip1_peak_1281
chr11	61597500	61597800	300	231.617	4.71051	0.000214608	1	chip1_peak_1365
chr1	54552100	54552300	200	231.679	4.71178	0.000386702	1	chip1_peak_2432
chr9	21438300	21438500	200	231.688	4.71196	0.0001235	1	chip1_peak_814
chr14	113843800	113844000	200	231.787	4.71398	0.000756989	1	chip1_peak_4996
chr16	92639600	92639800	200	231.88	4.71586	0.000653365	1	chip1_peak_4259
chr19	57927400	57927700	300	231.896	4.71618	0.000237352	1	chip1_peak_1517
chr8	122420500	122420700	200	231.902	4.71631	0.000202499	1	chip1_peak_1286
chr1	122471500	122471800	300	232.144	4.72123	0.000576379	1	chip1_peak_3709
chr17	72780800	72781000	200	232.166	4.72167	0.000583145	1	chip1_peak_3756
chr6	77343100	77343300	200	232.166	4.72167	0.000825036	1	chip1_peak_5496
chr3	149923900	149924100	200	232.166	4.72167	0.000838921	1	chip1_peak_5601
chr6	16968400	16968600	200	232.178	4.72191	0.000564581	1	chip1_peak_3639
chr1	187050000	187050200	200	232.178	4.72191	0.000564581	1	chip1_peak_3640
chr4	63362900	63363100	200	232.388	4.7262	0.000491589	1	chip1_peak_3129
chr15	83206100	83206300	200	232.422	4.72689	0.000750438	1	chip1_peak_4950
chr2	72373100	72373300	200	232.45	4.72745	0.000169827	1	chip1_peak_1067
chr4	99840700	99840900	200	232.455	4.72755	0.000657895	1	chip1_peak_4284
chr11	114988100	114988300	200	232.474	4.72794	0.000540617	1	chip1_peak_3476
chr9	67852200	67852400	200	232.474	4.72794	0.000540617	1	chip1_peak_3477
chr11	35815700	35816000	300	232.486	4.72819	0.000176251	1	chip1_peak_1112
chr1	187574200	187574400	200	232.529	4.72907	0.000562103	1	chip1_peak_3623
chr4	33265700	33265900	200	232.529	4.72907	0.000991157	1	chip1_peak_6756
chr16	77592400	77592600	200	232.535	4.72918	0.000645568	1	chip1_peak_4207
chr17	32430600	32431000	400	232.584	4.73018	9.23876e-05	1	chip1_peak_641
chr2	103634200	103634400	200	232.599	4.73048	0.000733453	1	chip1_peak_4826
chr5	65694000	65694300	300	232.602	4.73056	0.000174402	1	chip1_peak_1103
chr18	24113900	24114100	200	232.607	4.73065	0.000102202	1	chip1_peak_702
chr3	142767200	142767400	200	232.745	4.73346	0.000164942	1	chip1_peak_1040
chr3	100172000	100172200	200	232.766	4.73388	0.000552704	1	chip1_peak_3569
chr15	57230700	57230900	200	232.83	4.73519	0.000472379	1	chip1_peak_3012
chr18	38388300	38388600	300	232.843	4.73545	0.00024166	1	chip1_peak_1545
chr5	110465200	110465400	200	232.845	4.73548	0.000638553	1	chip1_peak_4162
chr12	71763500	71763700	200	232.936	4.73734	0.000847627	1	chip1_peak_5661
chr3	52245900	52246100	200	233.103	4.74074	0.00055059	1	chip1_peak_3555
chr6	22186300	22186500	200	233.103	4.74074	0.000624912	1	chip1_peak_4073
chr4	69639500	69639700	200	233.103	4.74074	0.000701633	1	chip1_peak_4581
chr2	137772200	137772400	200	233.109	4.74087	0.000467527	1	chip1_peak_2979
chr10	61379400	61379600	200	233.198	4.74267	0.000458546	1	chip1_peak_2917
chr2	129874800	129875000	200	233.388	4.74654	0.000705162	1	chip1_peak_4612
chr7	125098100	125098300	200	233.718	4.75323	0.000698038	1	chip1_peak_4550
chr2	6699400	6699600	200	233.767	4.75423	0.000528946	1	chip1_peak_3391
chr16	33878500	33878700	200	233.796	4.75483	0.000532534	1	chip1_peak_3417
chr4	149918600	149918800	200	233.796	4.75483	0.000532534	1	chip1_peak_3418
chr17	83813700	83814000	300	233.804	4.75499	0.000167321	1	chip1_peak_1056
chr2	27156500	27156700	200	233.81	4.75511	0.000627302	1	chip1_peak_4093
chr10	4165900	4166100	200	233.848	4.75588	0.000536013	1	chip1_peak_3440
chr1	61770600	61770800	200	233.848	4.75588	0.000536013	1	chip1_peak_3441
chr2	164943600	164943800	200	233.87	4.75634	0.000443539	1	chip1_peak_2812
chr6	14436100	14436300	200	233.917	4.75729	0.000249245	1	chip1_peak_1588
chr14	96382200	96382400	200	234.074	4.76048	0.000181812	1	chip1_peak_1147
chr11	24209100	24209300	200	234.074	4.76048	0.000210045	1	chip1_peak_1332
chr4	48126800	48127000	200	234.162	4.76227	0.00085783	1	chip1_peak_5724
chr17	46557600	46557800	200	234.223	4.76352	0.000520301	1	chip1_peak_3330
chr6	117957500	117957700	200	234.223	4.76352	0.000520301	1	chip1_peak_3331
chr6	136848800	136849000	200	234.327	4.76564	0.000413031	1	chip1_peak_2620
chr7	30704800	30705000	200	234.392	4.76694	0.000445881	1	chip1_peak_2824
chr8	70119600	70119800	200	234.516	4.76947	0.000362056	1	chip1_peak_2287
chr7	81611400	81611700	300	234.674	4.77268	0.000363139	1	chip1_peak_2293
chr9	55439200	55439400	200	234.722	4.77366	0.000444188	1	chip1_peak_2815
chr2	166909600	166909900	300	234.807	4.7754	0.000451723	1	chip1_peak_2863
chr10	39870800	39871000	200	234.866	4.77659	0.000584748	1	chip1_peak_3768
chr6	142835900	142836100	200	234.879	4.77686	0.000516478	1	chip1_peak_3304
chr2	88904900	88905100	200	234.879	4.77686	0.000516478	1	chip1_peak_3305
chr2	28531500	28531700	200	234.888	4.77705	0.000687771	1	chip1_peak_4499
chr17	72409700	72409900	200	234.996	4.77923	0.000840206	1	chip1_peak_5605
chr1	100497900	100498100	200	235.081	4.78097	0.000237785	1	chip1_peak_1523
chr15	82099600	82099800	200	235.097	4.78129	0.00055463	1	chip1_peak_3577
chr8	111646400	111646600	200	235.199	4.78337	0.000300558	1	chip1_peak_1879
chr2	179179200	179179500	300	235.258	4.78457	0.00031575	1	chip1_peak_1981
chr9	68725800	68726000	200	235.306	4.78553	0.000782904	1	chip1_peak_5201
chr16	95427000	95427200	200	235.399	4.78742	0.000226391	1	chip1_peak_1450
chr10	119929300	119929500	200	235.44	4.78827	0.000288047	1	chip1_peak_1814
chr5	129144600	129144800	200	235.447	4.78841	0.000432472	1	chip1_peak_2749
chr1	133506300	133506600	300	235.536	4.79021	0.000123954	1	chip1_peak_819
chr6	38565900	38566100	200	235.571	4.79093	0.000170675	1	chip1_peak_1074
chr8	26871700	26871900	200	235.616	4.79183	0.000774831	1	chip1_peak_5127
chr4	125562700	125562900	200	235.681	4.79316	4.16166e-05	1	chip1_peak_327
chr1	151780000	151780200	200	235.689	4.79333	0.000559306	1	chip1_peak_3605
chr18	5988900	5989200	300	235.699	4.79354	0.000876423	1	chip1_peak_5856
chr7	90022700	90022900	200	235.718	4.79392	0.000414181	1	chip1_peak_2638
chr4	134943100	134943300	200	235.722	4.79401	0.000752518	1	chip1_peak_4964
chr3	68868200	68868400	200	235.742	4.7944	0.000427806	1	chip1_peak_2726
chr19	34737800	34738100	300	235.753	4.79463	0.000505226	1	chip1_peak_3226
chr9	89886500	89886700	200	235.756	4.79469	0.000613043	1	chip1_peak_3981
chr2	4893300	4893500	200	235.848	4.79656	0.000305123	1	chip1_peak_1903
chr18	73962800	73963000	200	235.857	4.79674	0.000574349	1	chip1_peak_3697
chr4	133731000	133731200	200	235.908	4.79779	0.000871535	1	chip1_peak_5821
chr13	45945900	45946200	300	235.954	4.79872	0.00015524	1	chip1_peak_982
chr11	106095800	106096000	200	235.968	4.799	0.00075275	1	chip1_peak_4965
chr19	57513300	57513500	200	236.021	4.80008	0.000423427	1	chip1_peak_2702
chr18	12536600	12536800	200	236.021	4.80008	0.000423427	1	chip1_peak_2703
chr18	20864500	20864700	200	236.021	4.80008	0.000735875	1	chip1_peak_4843
chr12	103608600	103608800	200	236.046	4.80058	0.000212876	1	chip1_peak_1352
chr16	94606900	94607100	200	236.081	4.80129	0.000415408	1	chip1_peak_2641
chr2	72133100	72133300	200	236.126	4.80221	0.000485815	1	chip1_peak_3094
chr9	103029000	103029200	200	236.134	4.80238	0.000418116	1	chip1_peak_2667
chr3	131572600	131572800	200	236.14	4.8025	0.000191573	1	chip1_peak_1200
chr2	69255300	69255600	300	236.219	4.80411	0.000457276	1	chip1_peak_2904
chr10	76144300	76144500	200	236.299	4.80573	0.000656949	1	chip1_peak_4280
chr16	16864900	16865100	200	236.31	4.80596	0.000207481	1	chip1_peak_1317
chr4	68422600	68422900	300	236.357	4.80692	6.53335e-05	1	chip1_peak_473
chr4	114977300	114977500	200	236.413	4.80805	0.000413839	1	chip1_peak_2631
chr12	57380900	57381100	200	236.413	4.80805	0.00058445	1	chip1_peak_3766
chr11	116963700	116963900	200	236.506	4.80995	0.000551929	1	chip1_peak_3565
chr1	91918700	91918900	200	236.627	4.8124	0.000165928	1	chip1_peak_1045
chr8	122481400	122481700	300	236.679	4.81346	0.000255301	1	chip1_peak_1624
chr7	91460700	91460900	200	236.746	4.81483	0.000412277	1	chip1_peak_2614
chr7	109725700	109725900	200	236.766	4.81523	0.000222155	1	chip1_peak_1418
chr10	126912400	126912600	200	236.787	4.81567	0.000482267	1	chip1_peak_3072
chr19	47934200	47934400	200	236.925	4.81846	0.000161213	1	chip1_peak_1021
chr3	36174800	36175000	200	237.006	4.82012	0.00056084	1	chip1_peak_3615
chrY	90808600	90809100	500	237.057	4.82116	2.4804e-05	0.944058	chip1_peak_231
chr2	128467600	128467800	200	237.535	4.83087	0.000578084	1	chip1_peak_3729
chr4	105749000	105749200	200	237.576	4.8317	0.000723816	1	chip1_peak_4747
chr2	153919500	153919700	200	237.603	4.83226	0.000576672	1	chip1_peak_3711
chr1	175902100	175902300	200	237.621	4.83262	0.000900449	1	chip1_peak_6051
chr5	66096500	66096700	200	237.64	4.833	0.000392203	1	chip1_peak_2471
chr10	12706200	12706500	300	237.675	4.83372	7.73435e-05	1	chip1_peak_536
chr15	7197200	7197400	200	237.715	4.83453	0.000674767	1	chip1_peak_4409
chr4	46318500	46318700	200	237.742	4.83509	0.000963824	1	chip1_peak_6553
chr12	116346700	116346900	200	237.747	4.83518	0.000630609	1	chip1_peak_4115
chr10	3565000	3565200	200	237.997	4.84026	0.000698392	1	chip1_peak_4553
chr17	84939800	84940000	200	238.005	4.84042	0.000619729	1	chip1_peak_4031
chr16	77069200	77069500	300	238.009	4.84051	6.49885e-05	1	chip1_peak_471
chr9	64445100	64445400	300	238.021	4.84076	0.00019285	1	chip1_peak_1209
chr15	72767700	72768000	300	238.09	4.84216	0.000549939	1	chip1_peak_3553
chr3	59577900	59578100	200	238.212	4.84464	0.000443017	1	chip1_peak_2808
chr2	68067500	68067700	200	238.226	4.84491	0.000572349	1	chip1_peak_3685
chr14	21631800	21632100	300	238.255	4.84552	0.000396887	1	chip1_peak_2501
chr7	142482900	142483100	200	238.337	4.84719	0.000707513	1	chip1_peak_4632
chr1	135511900	135512100	200	238.393	4.84832	0.000455302	1	chip1_peak_2894
chr3	98648700	98648900	200	238.454	4.84955	0.000173063	1	chip1_peak_1091
chr1	170311400	170311600	200	238.547	4.85146	0.000427311	1	chip1_peak_2724
chr17	34927600	34927800	200	238.633	4.8532	0.000599888	1	chip1_peak_3891
chr10	62798000	62798200	200	238.646	4.85346	0.000819718	1	chip1_peak_5461
chr8	84407600	84407900	300	238.698	4.85453	0.000359083	1	chip1_peak_2274
chr9	53314400	53314600	200	238.771	4.85601	0.000441758	1	chip1_peak_2801
chr9	80117300	80117500	200	238.826	4.85713	0.000390587	1	chip1_peak_2461
chr3	123839000	123839300	300	238.929	4.85921	0.000562187	1	chip1_peak_3624
chr7	97310100	97310300	200	239.061	4.8619	0.000494037	1	chip1_peak_3145
chr18	51116600	51116900	300	239.082	4.86233	0.00022878	1	chip1_peak_1468
chr18	77148200	77148400	200	239.094	4.86257	0.00044021	1	chip1_peak_2790
chr4	105828800	105829000	200	239.094	4.86257	0.00044021	1	chip1_peak_2791
chr18	23885600	23885800	200	239.111	4.86291	0.000149505	1	chip1_peak_960
chr4	95628000	95628300	300	239.116	4.86302	0.000421134	1	chip1_peak_2683
chr13	113965300	113965600	300	239.246	4.86567	0.000281902	1	chip1_peak_1781
chr1	57420900	57421100	200	239.261	4.86597	0.000206522	1	chip1_peak_1314
chr6	148858600	148858800	200	239.338	4.86754	0.000607986	1	chip1_peak_3956
chr3	80105800	80106000	200	239.344	4.86765	0.000222095	1	chip1_peak_1417
chr14	30959100	30959300	200	239.353	4.86784	0.000450723	1	chip1_peak_2859
chr12	91783500	91783700	200	239.492	4.87068	0.000407393	1	chip1_peak_2582
chr6	34602300	34602500	200	239.492	4.87068	0.000556669	1	chip1_peak_3591
chr11	69129400	69129700	300	239.727	4.87545	0.000152035	1	chip1_peak_969
chr2	66408600	66408800	200	239.727	4.87545	0.000434086	1	chip1_peak_2755
chr7	125881700	125881900	200	239.735	4.87562	0.000178875	1	chip1_peak_1132
chr3	28807900	28808100	200	239.777	4.87646	0.000121864	1	chip1_peak_800
chr6	126123200	126123400	200	239.829	4.87753	0.000364993	1	chip1_peak_2308
chr15	77238400	77238600	200	239.841	4.87778	0.000355689	1	chip1_peak_2250
chr7	81563700	81563900	200	239.926	4.8795	0.000498072	1	chip1_peak_3175
chr15	51420900	51421100	200	240.014	4.88128	0.000588082	1	chip1_peak_3805
chr1	78662900	78663100	200	240.086	4.88275	0.00042142	1	chip1_peak_2687
chr3	103795000	103795200	200	240.178	4.88463	0.000354363	1	chip1_peak_2238
chr17	25180300	25180500	200	240.36	4.88832	0.000406576	1	chip1_peak_2574
chr13	71427300	71427600	300	240.39	4.88893	0.000773815	1	chip1_peak_5117
chr10	122002800	122003000	200	240.472	4.89059	0.000422691	1	chip1_peak_2696
chr7	29427100	29427300	200	240.723	4.8957	0.000481521	1	chip1_peak_3066
chr17	3485400	3485600	200	240.765	4.89656	0.000687034	1	chip1_peak_4494
chr7	45031500	45031700	200	240.779	4.89685	0.000563789	1	chip1_peak_3631
chr11	117515600	117515800	200	240.854	4.89837	0.000138985	1	chip1_peak_903
chr1	82359800	82360000	200	240.912	4.89955	0.000489429	1	chip1_peak_3113
chr12	57248500	57248700	200	240.914	4.8996	0.000117073	1	chip1_peak_780
chr5	24998900	24999100	200	241.025	4.90184	0.000564021	1	chip1_peak_3632
chr1	182530500	182530700	200	241.087	4.90312	0.00048645	1	chip1_peak_3097
chr1	170995200	170995500	300	241.094	4.90326	0.00092323	1	chip1_peak_6237
chr12	106216500	106216700	200	241.127	4.90392	0.00089052	1	chip1_peak_5969
chr3	148960700	148961000	300	241.192	4.90525	3.89153e-05	1	chip1_peak_309
chr4	149655700	149655900	200	241.266	4.90674	0.000781813	1	chip1_peak_5192
chr4	7316100	7316300	200	241.293	4.9073	0.000560608	1	chip1_peak_3613
chr9	65742500	65742700	200	241.293	4.9073	0.000904793	1	chip1_peak_6083
chr3	96546700	96546900	200	241.382	4.90911	0.000481488	1	chip1_peak_3065
chr1	152637100	152637300	200	241.406	4.90959	0.000992488	1	chip1_peak_6767
chr6	91714100	91714300	200	241.456	4.91062	0.000631047	1	chip1_peak_4118
chr2	180111300	180111500	200	241.495	4.9114	0.000507325	1	chip1_peak_3243
chr5	45487800	45488000	200	241.511	4.91173	0.000653294	1	chip1_peak_4257
chr6	90710300	90710500	200	241.547	4.91246	3.23206e-05	1	chip1_peak_274
chr16	24990600	24990800	200	241.579	4.91312	0.000775455	1	chip1_peak_5132
chr1	37627500	37627700	200	241.587	4.91328	0.00050713	1	chip1_peak_3240
chr11	8902900	8903100	200	241.587	4.91328	0.000729099	1	chip1_peak_4780
chr6	29710600	29710800	200	241.689	4.91535	0.000505801	1	chip1_peak_3228
chr9	96531500	96531700	200	241.743	4.91644	0.000400433	1	chip1_peak_2527
chr2	133766700	133766900	200	241.743	4.91644	0.000958079	1	chip1_peak_6513
chr1	160656800	160657100	300	241.841	4.91844	0.000700708	1	chip1_peak_4568
chr6	100883800	100884000	200	241.877	4.91917	0.000156509	1	chip1_peak_988
chr5	81722000	81722200	200	241.881	4.91926	0.000670136	1	chip1_peak_4368
chr19	7009500	7009800	300	241.971	4.92109	9.92616e-05	1	chip1_peak_684
chr11	84229900	84230200	300	242.029	4.92228	0.000103037	1	chip1_peak_704
chr10	52303600	52303800	200	242.087	4.92344	9.47709e-05	1	chip1_peak_656
chr7	129521900	129522100	200	242.093	4.92356	0.000692357	1	chip1_peak_4524
chr6	91244500	91244800	300	242.184	4.92542	0.000274935	1	chip1_peak_1748
chr12	28915400	28915600	200	242.192	4.92558	0.000533124	1	chip1_peak_3422
chr6	51588000	51588200	200	242.244	4.92665	0.000467981	1	chip1_peak_2986
chr4	139645900	139646100	200	242.25	4.92677	0.000541034	1	chip1_peak_3480
chr15	83071500	83071700	200	242.283	4.92743	0.000859536	1	chip1_peak_5735
chr4	107591000	107591200	200	242.38	4.9294	0.000458449	1	chip1_peak_2916
chr10	111623500	111623700	200	242.44	4.93062	0.000349058	1	chip1_peak_2210
chr13	19037200	19037400	200	242.445	4.93073	0.000387328	1	chip1_peak_2440
chr13	112833400	112833700	300	242.479	4.93142	7.9106e-05	1	chip1_peak_546
chr14	54789400	54789600	200	242.578	4.93343	0.000765411	1	chip1_peak_5069
chr10	81325800	81326100	300	242.596	4.93379	3.26716e-05	1	chip1_peak_276
chr4	139364300	139364500	200	242.644	4.93478	0.000453045	1	chip1_peak_2878
chr1	132264800	132265100	300	242.73	4.93652	0.000199654	1	chip1_peak_1265
chr6	118119000	118119200	200	242.938	4.94076	0.000491332	1	chip1_peak_3127
chr16	24384800	24385000	200	243.017	4.94237	0.000379498	1	chip1_peak_2397
chr18	10570300	10570500	200	243.059	4.94322	0.000382067	1	chip1_peak_2412
chr17	46014800	46015000	200	243.501	4.9522	0.000376104	1	chip1_peak_2380
chr14	34977100	34977300	200	243.538	4.95295	0.000418305	1	chip1_peak_2668
chr4	138946000	138946200	200	243.575	4.9537	0.000310108	1	chip1_peak_1936
chr16	35478300	35478500	200	243.601	4.95425	0.000362151	1	chip1_peak_2288
chr8	87994200	87994400	200	243.702	4.9563	0.000440166	1	chip1_peak_2789
chr2	84833900	84834100	200	243.706	4.95637	0.00065768	1	chip1_peak_4282
chr7	73405000	73405200	200	243.826	4.95882	0.000167167	1	chip1_peak_1054
chr6	137093000	137093200	200	243.916	4.96064	0.000717888	1	chip1_peak_4706
chr5	89358000	89358200	200	243.933	4.96098	0.00088848	1	chip1_peak_5950
chr2	153560000	153560200	200	243.98	4.96195	0.000305538	1	chip1_peak_1907
chr14	100144100	100144300	200	244.089	4.96416	0.000314326	1	chip1_peak_1971
chr11	31670100	31670300	200	244.135	4.96509	0.00034405	1	chip1_peak_2171
chr14	118293900	118294200	300	244.268	4.96781	0.000338708	1	chip1_peak_2142
chr11	101537700	101537900	200	244.285	4.96814	0.000926473	1	chip1_peak_6262
chrX	134750700	134750900	200	244.365	4.96978	0.000306472	1	chip1_peak_1913
chr8	44764800	44765100	300	244.37	4.96988	0.000528138	1	chip1_peak_3384
chr15	102067300	102067500	200	244.388	4.97024	0.000202155	1	chip1_peak_1284
chr13	105049100	105049300	200	244.443	4.97136	0.000366952	1	chip1_peak_2318
chr18	74032500	74032700	200	244.539	4.97332	0.000118138	1	chip1_peak_785
chr14	23952300	23952500	200	244.6	4.97455	0.000993691	1	chip1_peak_6780
chr9	111745800	111746000	200	244.644	4.97544	0.000303371	1	chip1_peak_1896
chr6	16802300	16802500	200	244.656	4.9757	0.000494277	1	chip1_peak_3149
chr13	112995100	112995400	300	244.897	4.98059	0.000409607	1	chip1_peak_2596
chr15	85283100	85283300	200	244.964	4.98197	0.000747438	1	chip1_peak_4925
chr13	74114600	74114800	200	244.993	4.98255	0.000623488	1	chip1_peak_4061
chr12	73754500	73754700	200	245.009	4.98287	0.000683181	1	chip1_peak_4470
chr1	172335000	172335200	200	245.018	4.98306	8.26926e-05	1	chip1_peak_579
chr4	88742700	88742900	200	245.226	4.98728	0.000427164	1	chip1_peak_2722
chr7	98493600	98493800	200	245.226	4.98729	0.000134218	1	chip1_peak_869
chr6	145921200	145921700	500	245.27	4.98817	0.000220968	1	chip1_peak_1409
chr9	45071800	45072000	200	245.319	4.98918	0.000453119	1	chip1_peak_2879
chr5	34818900	34819100	200	245.334	4.98948	0.000439574	1	chip1_peak_2786
chr6	96247100	96247300	200	245.348	4.98977	0.000487181	1	chip1_peak_3102
chr5	72467900	72468100	200	245.363	4.99007	0.000412228	1	chip1_peak_2613
chr19	34598600	34598800	200	245.572	4.99432	0.000134628	1	chip1_peak_872
chr7	66657900	66658200	300	245.576	4.99441	0.00020884	1	chip1_peak_1327
chr5	139236200	139236500	300	245.637	4.99565	0.000199193	1	chip1_peak_1259
chr16	92645400	92645600	200	245.657	4.99604	0.000408048	1	chip1_peak_2589
chr16	17048400	17048700	300	245.736	4.99766	0.000195761	1	chip1_peak_1232
chr4	63097000	63097200	200	245.763	4.99821	0.000196354	1	chip1_peak_1237
chr2	143998000	143998200	200	245.865	5.00028	0.00013058	1	chip1_peak_850
chr17	14137400	14137700	300	245.918	5.00137	0.00059626	1	chip1_peak_3873
chr8	34782200	34782400	200	245.951	5.00202	0.000482655	1	chip1_peak_3074
chr8	61075500	61075700	200	245.978	5.00258	0.000284006	1	chip1_peak_1789
chr6	116279200	116279400	200	246.105	5.00516	0.000909857	1	chip1_peak_6132
chr2	68927700	68927900	200	246.405	5.01127	0.000336384	1	chip1_peak_2126
chr15	84185000	84185200	200	246.481	5.01281	0.000416834	1	chip1_peak_2657
chr3	98085600	98085800	200	246.602	5.01527	0.000237524	1	chip1_peak_1519
chr10	13867700	13867900	200	246.642	5.01608	0.000398906	1	chip1_peak_2515
chr6	54484800	54485200	400	246.699	5.01725	9.75326e-05	1	chip1_peak_673
chr6	84491100	84491300	200	246.714	5.01754	0.000393379	1	chip1_peak_2478
chr9	103712600	103712900	300	246.755	5.01838	0.000194613	1	chip1_peak_1222
chr8	46328500	46328800	300	246.842	5.02015	0.000240654	1	chip1_peak_1536
chr4	8826600	8826800	200	247.071	5.02481	0.000689716	1	chip1_peak_4515
chr16	33807300	33807500	200	247.279	5.02904	0.000472279	1	chip1_peak_3010
chr13	90720700	90720900	200	247.434	5.03219	0.000324323	1	chip1_peak_2040
chr1	39788000	39788200	200	247.479	5.0331	0.000266459	1	chip1_peak_1696
chr15	83739600	83739900	300	247.656	5.03671	0.000681839	1	chip1_peak_4466
chr7	24515000	24515300	300	247.846	5.04056	0.000311353	1	chip1_peak_1947
chr2	167720500	167720700	200	247.863	5.04092	0.000943413	1	chip1_peak_6405
chr2	11413700	11413900	200	247.875	5.04116	0.000581131	1	chip1_peak_3745
chr2	166612000	166612200	200	247.911	5.04189	6.85278e-05	1	chip1_peak_494
chr9	100462400	100462600	200	247.956	5.04281	0.000821893	1	chip1_peak_5473
chr5	140463600	140463800	200	247.999	5.04369	0.000309548	1	chip1_peak_1930
chr8	123734400	123734600	200	248.003	5.04377	0.000999967	1	chip1_peak_6829
chr2	30128600	30128800	200	248.065	5.04502	0.000375423	1	chip1_peak_2373
chr11	109045700	109045900	200	248.264	5.04908	0.000983241	1	chip1_peak_6697
chr4	105858700	105858900	200	248.292	5.04964	0.000569258	1	chip1_peak_3667
chr15	59149800	59150000	200	248.359	5.051	0.000860913	1	chip1_peak_5749
chr16	32956500	32956700	200	248.446	5.05277	0.000520966	1	chip1_peak_3334
chr18	35403700	35404000	300	248.495	5.05376	0.000247843	1	chip1_peak_1577
chr10	45847900	45848100	200	248.632	5.05656	0.000972653	1	chip1_peak_6618
chr5	124481900	124482100	200	248.632	5.05656	0.000972653	1	chip1_peak_6619
chr3	102271900	102272100	200	248.632	5.05656	0.000972653	1	chip1_peak_6620
chr2	72650500	72650700	200	248.642	5.05676	0.000380325	1	chip1_peak_2401
chr2	5604800	5605000	200	248.643	5.05679	0.000313366	1	chip1_peak_1963
chr1	84053800	84054000	200	248.643	5.05679	0.000313366	1	chip1_peak_1964
chr6	125226600	125226800	200	248.738	5.0587	0.000889385	1	chip1_peak_5958
chr16	22945800	22946000	200	248.885	5.0617	0.000706559	1	chip1_peak_4626
chr15	34477000	34477200	200	249.071	5.06548	0.000969087	1	chip1_peak_6589
chr10	60427700	60427900	200	249.09	5.06587	0.000382669	1	chip1_peak_2414
chr3	33411300	33411600	300	249.148	5.06705	0.000269931	1	chip1_peak_1719
chr3	27942700	27942900	200	249.201	5.06812	0.000460435	1	chip1_peak_2928
chr13	98196500	98196700	200	249.294	5.07002	0.000989236	1	chip1_peak_6743
chr7	112313300	112313500	200	249.295	5.07004	0.00025848	1	chip1_peak_1642
chr13	41137700	41137900	200	249.42	5.07258	8.15452e-05	1	chip1_peak_564
chr10	84091600	84091900	300	249.455	5.07329	0.000571607	1	chip1_peak_3682
chr5	105533000	105533200	200	249.489	5.07398	0.000407847	1	chip1_peak_2584
chr7	45620000	45620200	200	249.517	5.07455	0.00079321	1	chip1_peak_5285
chr2	152919300	152919500	200	249.554	5.07531	0.000972701	1	chip1_peak_6621
chr8	122042400	122042600	200	249.623	5.0767	0.000300132	1	chip1_peak_1877
chr2	32868400	32868600	200	249.882	5.08197	0.000131506	1	chip1_peak_852
chr16	10670600	10670800	200	249.924	5.08283	0.000962241	1	chip1_peak_6544
chr19	21453200	21453500	300	250.028	5.08495	0.000447773	1	chip1_peak_2837
chr11	97393500	97393700	200	250.147	5.08737	0.000272052	1	chip1_peak_1730
chr4	99639800	99640000	200	250.367	5.09185	0.00095873	1	chip1_peak_6514
chr2	48712600	48712800	200	250.426	5.09304	0.000905516	1	chip1_peak_6094
chr3	127798100	127798300	200	250.677	5.09816	0.000924492	1	chip1_peak_6249
chr7	132352400	132352700	300	250.754	5.09971	0.00049107	1	chip1_peak_3124
chr7	29488400	29488600	200	250.756	5.09975	0.00081518	1	chip1_peak_5427
chr2	31278200	31278400	200	250.819	5.10103	0.000472931	1	chip1_peak_3019
chr17	5319500	5319800	300	250.846	5.10158	0.00011629	1	chip1_peak_775
chr4	72121100	72121300	200	251.076	5.10625	0.000240133	1	chip1_peak_1534
chr1	75012300	75012600	300	251.174	5.10825	0.000125921	1	chip1_peak_826
chr16	32859800	32860000	200	251.175	5.10828	9.05315e-05	1	chip1_peak_636
chr6	39089300	39089500	200	251.185	5.10848	0.000927444	1	chip1_peak_6267
chr6	87527500	87527700	200	251.185	5.10848	0.000927444	1	chip1_peak_6268
chr12	83837600	83837800	200	251.279	5.1104	0.00093358	1	chip1_peak_6325
chr12	112311400	112311600	200	251.279	5.1104	0.00093358	1	chip1_peak_6326
chr2	166226700	166226900	200	251.404	5.11294	0.000405202	1	chip1_peak_2567
chr14	55787800	55788000	200	251.429	5.11344	0.000239274	1	chip1_peak_1532
chr10	18591300	18591500	200	251.505	5.11499	0.000339461	1	chip1_peak_2148
chr5	37048500	37048700	200	251.525	5.11539	0.000579442	1	chip1_peak_3741
chr3	138023000	138023200	200	251.536	5.11562	0.000918002	1	chip1_peak_6188
chr2	86832100	86832300	200	251.585	5.11661	0.00090026	1	chip1_peak_6048
chr14	103034500	103034800	300	251.6	5.11691	0.000297578	1	chip1_peak_1865
chr2	27061200	27061400	200	251.608	5.11708	0.000177191	1	chip1_peak_1117
chrX	13144500	13144700	200	251.631	5.11754	0.000924076	1	chip1_peak_6244
chr4	135690300	135690500	200	251.665	5.11825	9.72057e-05	1	chip1_peak_670
chr6	114248700	114248900	200	251.815	5.12128	0.000224292	1	chip1_peak_1435
chr3	142142000	142142200	200	251.887	5.12275	0.00090866	1	chip1_peak_6125
chr11	76922100	76922300	200	251.943	5.12389	0.000104014	1	chip1_peak_712
chr4	3656000	3656200	200	251.982	5.12469	0.000914673	1	chip1_peak_6165
chr16	24287800	24288000	200	252.063	5.12633	0.000314206	1	chip1_peak_1970
chr9	79238200	79238500	300	252.107	5.12722	0.000927732	1	chip1_peak_6269
chr4	129979400	129979600	200	252.15	5.12811	0.000326134	1	chip1_peak_2059
chr3	149113400	149113700	300	252.169	5.12849	0.000273105	1	chip1_peak_1740
chr4	41072100	41072400	300	252.223	5.12959	0.000202499	1	chip1_peak_1287
chr16	18140900	18141100	200	252.23	5.12973	0.000298225	1	chip1_peak_1868
chr4	134182200	134182400	200	252.273	5.13061	0.000267359	1	chip1_peak_1702
chr7	129608800	129609000	200	252.334	5.13184	0.00090537	1	chip1_peak_6088
chr4	138840500	138840700	200	252.334	5.13184	0.00090537	1	chip1_peak_6089
chr1	190280100	190280300	200	252.334	5.13184	0.00090537	1	chip1_peak_6090
chr15	85947600	85947800	200	252.372	5.13262	0.000685336	1	chip1_peak_4486
chr14	73592100	73592500	400	252.484	5.13489	0.000233884	1	chip1_peak_1500
chr15	98459600	98459800	200	252.73	5.13989	0.000999577	1	chip1_peak_6825
chr12	81724800	81725100	300	252.781	5.14093	0.000304134	1	chip1_peak_1899
chr3	116199300	116199500	200	252.797	5.14127	0.000884877	1	chip1_peak_5931
chr12	81866000	81866200	200	252.894	5.14324	0.000890732	1	chip1_peak_5972
chr16	31008800	31009000	200	253.005	5.1455	0.000584151	1	chip1_peak_3761
chr1	68259800	68260000	200	253.113	5.1477	0.000852856	1	chip1_peak_5693
chr10	107278700	107278900	200	253.207	5.14961	0.000314509	1	chip1_peak_1973
chr12	74516000	74516200	200	253.246	5.15039	0.000881684	1	chip1_peak_5904
chr9	37004500	37004800	300	253.377	5.15306	0.000422415	1	chip1_peak_2693
chr1	170408000	170408200	200	253.462	5.15479	0.0008442	1	chip1_peak_5639
chr14	117763200	117763400	200	253.518	5.15593	0.000866516	1	chip1_peak_5791
chr16	78299500	78299700	200	253.597	5.15752	0.000217328	1	chip1_peak_1383
chr4	151502100	151502300	200	253.597	5.15754	0.000872733	1	chip1_peak_5831
chr1	186555500	186555700	200	253.647	5.15854	0.000441476	1	chip1_peak_2799
chr6	146667000	146667200	200	253.649	5.15858	0.00099237	1	chip1_peak_6766
chr4	140032200	140032600	400	253.696	5.15954	2.26278e-05	0.899228	chip1_peak_220
chr2	26369400	26369600	200	253.73	5.16023	0.000400045	1	chip1_peak_2522
chr12	56874000	56874200	200	253.795	5.16157	0.000578199	1	chip1_peak_3730
chr6	91168400	91168600	200	253.806	5.16179	0.000867447	1	chip1_peak_5799
chr5	144649200	144649400	200	253.811	5.16189	0.000835636	1	chip1_peak_5576
chr14	116169200	116169400	200	253.884	5.16337	0.000355273	1	chip1_peak_2246
chr7	25024700	25024900	200	253.932	5.16435	5.42467e-05	1	chip1_peak_409
chr17	63685300	63685600	300	253.933	5.16437	0.000435898	1	chip1_peak_2771
chr2	135267100	135267300	200	253.968	5.16507	0.000863399	1	chip1_peak_5765
chr2	48190100	48190300	200	254.078	5.16731	0.000982719	1	chip1_peak_6692
chr10	26713600	26713800	200	254.223	5.17027	0.000976327	1	chip1_peak_6642
chr11	119840100	119840300	200	254.265	5.17111	0.000303314	1	chip1_peak_1895
chr12	71771100	71771300	200	254.367	5.17318	0.000217248	1	chip1_peak_1381
chr8	46687800	46688000	200	254.467	5.17523	0.000827598	1	chip1_peak_5521
chr9	60468200	60468400	200	254.518	5.17626	0.000208264	1	chip1_peak_1320
chr5	45841800	45842000	200	254.595	5.17784	0.000548172	1	chip1_peak_3537
chr2	70976200	70976400	200	254.646	5.17887	0.000232497	1	chip1_peak_1488
chr15	87660800	87661000	200	254.647	5.17888	0.000992007	1	chip1_peak_6761
chr6	41761500	41761700	200	254.647	5.17888	0.000992007	1	chip1_peak_6762
chr17	68190400	68190600	200	254.717	5.18031	0.000813829	1	chip1_peak_5419
chr1	122889800	122890000	200	254.779	5.18158	0.000835334	1	chip1_peak_5574
chr4	138122400	138122600	200	254.779	5.18158	0.000866579	1	chip1_peak_5792
chr17	53666400	53666600	200	254.913	5.18429	0.000249082	1	chip1_peak_1585
chr8	91022200	91022400	200	255.054	5.18716	7.5798e-05	1	chip1_peak_530
chr19	42082800	42083000	200	255.062	5.18732	6.48921e-05	1	chip1_peak_469
chr16	10353800	10354000	200	255.092	5.18793	0.000211663	1	chip1_peak_1342
chr19	14571600	14571800	200	255.107	5.18825	0.000547978	1	chip1_peak_3536
chr15	58055000	58055200	200	255.13	5.18871	0.000826872	1	chip1_peak_5514
chr8	75616100	75616300	200	255.13	5.18871	0.000826872	1	chip1_peak_5515
chr15	28170700	28170900	200	255.13	5.18871	0.000828999	1	chip1_peak_5531
chr9	121313300	121313500	200	255.13	5.18871	0.000920177	1	chip1_peak_6208
chr4	136318500	136318800	300	255.163	5.18937	0.000203996	1	chip1_peak_1295
chr7	100702400	100702600	200	255.167	5.18945	0.000810916	1	chip1_peak_5407
chr8	114031800	114032000	200	255.21	5.19034	0.000254156	1	chip1_peak_1618
chr12	113325100	113325300	200	255.231	5.19077	0.000832344	1	chip1_peak_5551
chr2	125672100	125672300	200	255.267	5.1915	0.000134466	1	chip1_peak_870
chr14	55870400	55870600	200	255.457	5.19535	0.000291187	1	chip1_peak_1833
chr11	119354100	119354300	200	255.528	5.1968	7.98884e-05	1	chip1_peak_552
chr12	8273300	8273500	200	255.83	5.20294	7.40626e-05	1	chip1_peak_522
chr5	149093300	149093500	200	255.914	5.20465	0.000977504	1	chip1_peak_6652
chr11	33608600	33608800	200	255.914	5.20465	0.000312503	1	chip1_peak_1959
chr6	72980900	72981100	200	255.949	5.20536	0.000956285	1	chip1_peak_6498
chr3	9764700	9765000	300	255.999	5.20637	2.75351e-05	0.977408	chip1_peak_250
chr4	104765300	104765500	200	256.013	5.20666	0.000711503	1	chip1_peak_4673
chr19	37548900	37549100	200	256.123	5.2089	0.000336255	1	chip1_peak_2123
chr16	24788400	24788600	200	256.172	5.2099	0.000194359	1	chip1_peak_1219
chr11	88624700	88624900	200	256.192	5.21031	0.000289203	1	chip1_peak_1822
chr5	37193600	37193800	200	256.225	5.21097	0.000602213	1	chip1_peak_3913
chr18	46670800	46671000	200	256.311	5.21273	0.000946592	1	chip1_peak_6425
chr7	30765400	30765600	200	256.391	5.21436	0.000797181	1	chip1_peak_5310
chr3	144592300	144592500	200	256.398	5.2145	0.000526889	1	chip1_peak_3378
chr10	30164300	30164500	200	256.494	5.21644	0.000959417	1	chip1_peak_6518
chr10	55833800	55834000	200	256.494	5.21644	0.000959417	1	chip1_peak_6519
chr1	172345600	172345800	200	256.494	5.21644	0.000959417	1	chip1_peak_6520
chr7	130142200	130142400	200	256.513	5.21684	0.00033507	1	chip1_peak_2114
chr17	8280500	8280700	200	256.514	5.21685	0.000280853	1	chip1_peak_1771
chr13	114055600	114055900	300	256.573	5.21806	3.24295e-05	1	chip1_peak_275
chr19	54619100	54619300	200	256.59	5.21839	0.000965771	1	chip1_peak_6563
chr5	37361900	37362100	200	256.618	5.21898	0.000912337	1	chip1_peak_6143
chr7	108408400	108408700	300	256.646	5.21954	0.000745778	1	chip1_peak_4911
chr18	64371600	64371800	200	256.653	5.21969	8.29454e-05	1	chip1_peak_580
chr2	163815000	163815200	200	256.666	5.21994	0.000730481	1	chip1_peak_4794
chr8	17198300	17198600	300	256.688	5.2204	0.000340687	1	chip1_peak_2153
chr2	122768600	122768800	200	256.694	5.22053	0.0009186	1	chip1_peak_6194
chr9	66580500	66580700	200	256.773	5.22213	0.000773907	1	chip1_peak_5120
chr10	86333300	86333500	200	256.857	5.22384	0.000949697	1	chip1_peak_6450
chr13	52162100	52162300	200	256.957	5.22587	0.000281762	1	chip1_peak_1779
chr3	144409000	144409200	200	257.038	5.22751	0.000760637	1	chip1_peak_5031
chr3	147023800	147024000	200	257.038	5.22751	0.000760637	1	chip1_peak_5032
chr9	29205100	29205300	200	257.038	5.22751	0.000760637	1	chip1_peak_5033
chr10	126899400	126899600	200	257.221	5.23123	0.00094008	1	chip1_peak_6380
chr11	95426700	95426900	200	257.229	5.2314	0.00019605	1	chip1_peak_1236
chr6	89330000	89330200	200	257.233	5.23147	0.000907281	1	chip1_peak_6111
chr13	28657600	28657900	300	257.296	5.23275	0.000454201	1	chip1_peak_2886
chr1	140104900	140105100	200	257.331	5.23347	0.000966067	1	chip1_peak_6569
chr3	143442400	143442600	200	257.338	5.23362	0.000876901	1	chip1_peak_5858
chr13	41172100	41172300	200	257.416	5.2352	0.000900101	1	chip1_peak_6043
chr12	111462000	111462300	300	257.512	5.23715	0.000451774	1	chip1_peak_2865
chr8	22755100	22755300	200	257.587	5.23867	0.000576782	1	chip1_peak_3713
chr13	83529600	83529800	200	257.613	5.23921	0.000912583	1	chip1_peak_6144
chr12	41575300	41575500	200	257.613	5.23921	0.000912583	1	chip1_peak_6145
chr13	108403600	108403800	200	257.633	5.23961	0.000948728	1	chip1_peak_6440
chr15	34385900	34386100	200	257.881	5.24465	0.000329333	1	chip1_peak_2078
chr3	33472100	33472400	300	257.947	5.24599	0.00010455	1	chip1_peak_715
chr17	10158200	10158400	200	257.995	5.24697	0.000902858	1	chip1_peak_6068
chr8	90663600	90663800	200	257.995	5.24697	0.000902858	1	chip1_peak_6069
chr11	4296000	4296200	200	258.023	5.24754	0.000760433	1	chip1_peak_5025
chr6	114015300	114015600	300	258.082	5.24874	0.000391097	1	chip1_peak_2465
chr4	155483800	155484000	200	258.11	5.24931	0.000765888	1	chip1_peak_5071
chr5	32244100	32244300	200	258.129	5.2497	0.000877319	1	chip1_peak_5861
chr7	144085700	144085900	200	258.2	5.25115	0.000635293	1	chip1_peak_4142
chr12	37994800	37995000	200	258.28	5.25277	0.000225493	1	chip1_peak_1443
chr2	30706600	30706800	200	258.28	5.25277	0.000225493	1	chip1_peak_1444
chr14	69785900	69786200	300	258.324	5.25367	0.000707904	1	chip1_peak_4635
chr5	99254900	99255100	200	258.326	5.25371	0.000870273	1	chip1_peak_5814
chr11	45345300	45345500	200	258.357	5.25434	0.000893732	1	chip1_peak_5995
chr13	51868200	51868400	200	258.469	5.25661	0.00028647	1	chip1_peak_1803
chr11	107717600	107717800	200	258.713	5.26159	0.00086782	1	chip1_peak_5802
chr4	88698700	88698900	200	258.713	5.26159	0.00086782	1	chip1_peak_5803
chr2	45482900	45483200	300	258.773	5.2628	0.000638893	1	chip1_peak_4164
chr15	73581900	73582100	200	258.792	5.26319	0.000441699	1	chip1_peak_2800
chr7	114082600	114082800	200	258.832	5.26399	0.00075011	1	chip1_peak_4946
chr7	136554700	136554900	200	258.832	5.26399	0.00075011	1	chip1_peak_4947
chr9	119616200	119616400	200	258.832	5.26399	0.00075011	1	chip1_peak_4948
chr11	52276200	52276400	200	258.832	5.26399	0.000774365	1	chip1_peak_5121
chrX	100815500	100815700	200	258.91	5.26559	0.00089669	1	chip1_peak_6017
chr16	42028500	42028700	200	258.91	5.26559	0.00089669	1	chip1_peak_6018
chr6	137333600	137333800	200	258.91	5.26559	0.00089669	1	chip1_peak_6019
chr15	68264000	68264200	200	258.933	5.26605	0.000740697	1	chip1_peak_4877
chr5	21007500	21007700	200	259.087	5.26918	0.000752226	1	chip1_peak_4960
chr11	95497300	95497600	300	259.091	5.26926	0.000768606	1	chip1_peak_5089
chr11	114665900	114666100	200	259.159	5.27065	0.000218007	1	chip1_peak_1387
chr4	32985500	32985700	200	259.274	5.27298	0.000887636	1	chip1_peak_5942
chr3	55789200	55789400	200	259.378	5.2751	0.000174837	1	chip1_peak_1106
chr2	31422600	31422800	200	259.511	5.27781	0.000729275	1	chip1_peak_4781
chr14	54223400	54223600	200	259.535	5.27829	0.000819527	1	chip1_peak_5458
chr17	45892000	45892200	200	259.659	5.28082	0.000861713	1	chip1_peak_5755
chr15	76641300	76641500	200	259.659	5.28082	0.000861713	1	chip1_peak_5756
chr3	72649800	72650000	200	259.659	5.28082	0.000861713	1	chip1_peak_5757
chr15	81166600	81166800	200	259.725	5.28217	0.000484949	1	chip1_peak_3092
chr17	12242800	12243000	200	259.744	5.28254	0.000730661	1	chip1_peak_4798
chr5	127864300	127864500	200	259.744	5.28254	0.000730661	1	chip1_peak_4799
chr8	41456800	41457000	200	259.812	5.28393	0.000532198	1	chip1_peak_3416
chr14	14781300	14781500	200	259.854	5.28477	0.000873389	1	chip1_peak_5837
chr18	12477100	12477300	200	260.083	5.28945	0.000295937	1	chip1_peak_1857
chr6	94650900	94651200	300	260.115	5.29009	0.000151532	1	chip1_peak_968
chr1	75684700	75684900	200	260.217	5.29217	0.000864582	1	chip1_peak_5772
chr3	55238900	55239100	200	260.264	5.29313	0.000692661	1	chip1_peak_4526
chr8	106650800	106651000	200	260.54	5.29873	0.000240949	1	chip1_peak_1538
chr7	90686400	90686600	200	260.58	5.29956	0.000855868	1	chip1_peak_5711
chr14	34048300	34048500	200	260.599	5.29993	0.000839349	1	chip1_peak_5602
chr7	142755300	142755500	200	260.613	5.30023	0.000919021	1	chip1_peak_6196
chr15	27188600	27188900	300	260.628	5.30052	0.000573494	1	chip1_peak_3689
chr15	67487900	67488100	200	260.842	5.30487	0.000204272	1	chip1_peak_1296
chr17	6181400	6181700	300	260.846	5.30496	0.00022713	1	chip1_peak_1456
chr17	25393900	25394100	200	260.932	5.30671	0.00030887	1	chip1_peak_1928
chr19	42431200	42431400	200	260.954	5.30716	0.00027142	1	chip1_peak_1727
chr5	29624700	29624900	200	260.998	5.30806	0.000986945	1	chip1_peak_6723
chr6	14720100	14720400	300	261.099	5.3101	0.000631322	1	chip1_peak_4123
chr9	21398600	21398800	200	261.244	5.31304	0.000940611	1	chip1_peak_6383
chr8	122363100	122363300	200	261.262	5.31343	0.000349244	1	chip1_peak_2213
chr10	12712300	12712500	200	261.319	5.31459	0.000847202	1	chip1_peak_5656
chr17	59558700	59558900	200	261.323	5.31466	0.000903955	1	chip1_peak_6079
chr4	48085900	48086100	200	261.604	5.32037	0.000792855	1	chip1_peak_5282
chr7	75114400	75114600	200	261.705	5.32243	0.000820266	1	chip1_peak_5464
chr15	47321000	47321200	200	261.868	5.32574	0.000661271	1	chip1_peak_4309
chr7	43915800	43916000	200	261.887	5.32613	0.000825292	1	chip1_peak_5497
chr5	135059100	135059300	200	261.902	5.32644	0.000166372	1	chip1_peak_1049
chr13	96633200	96633400	200	261.902	5.32644	0.000275554	1	chip1_peak_1755
chr11	87865600	87865900	300	261.947	5.32736	0.000148526	1	chip1_peak_954
chr9	61953800	61954000	200	261.964	5.3277	0.000784884	1	chip1_peak_5217
chr2	61493000	61493200	200	261.967	5.32776	0.000782941	1	chip1_peak_5202
chr2	69273500	69273700	200	261.977	5.32796	3.98809e-05	1	chip1_peak_318
chr5	92861600	92861900	300	262.011	5.32865	0.000211618	1	chip1_peak_1341
chr13	9744900	9745100	200	262.251	5.33353	0.000196409	1	chip1_peak_1238
chr3	108502700	108503000	300	262.269	5.3339	0.000142073	1	chip1_peak_920
chr8	115681000	115681200	200	262.318	5.3349	0.000794206	1	chip1_peak_5294
chr16	74832700	74832900	200	262.33	5.33514	0.000658975	1	chip1_peak_4295
chr13	45280900	45281100	200	262.407	5.3367	0.000275626	1	chip1_peak_1756
chr11	75912300	75912500	200	262.432	5.33721	0.000676353	1	chip1_peak_4419
chr10	126957100	126957300	200	262.432	5.33721	0.000676353	1	chip1_peak_4420
chr1	71098200	71098400	200	262.432	5.33721	0.000676353	1	chip1_peak_4421
chr13	59651600	59651800	200	262.432	5.33721	0.000984055	1	chip1_peak_6703
chr2	91355000	91355200	200	262.488	5.33836	9.88371e-05	1	chip1_peak_683
chr8	122577900	122578100	200	262.502	5.33864	0.000588092	1	chip1_peak_3806
chr3	84341600	84341800	200	262.634	5.34131	0.00080834	1	chip1_peak_5394
chr3	100431000	100431200	200	262.634	5.34131	0.000929525	1	chip1_peak_6289
chr15	38654400	38654600	200	262.634	5.34131	0.000964442	1	chip1_peak_6556
chr5	36442800	36443000	200	262.709	5.34285	0.00027289	1	chip1_peak_1738
chr6	38908300	38908500	200	262.825	5.3452	0.000347669	1	chip1_peak_2196
chr1	121592700	121593000	300	262.911	5.34695	0.000539915	1	chip1_peak_3472
chr11	88714100	88714300	200	263.007	5.34891	0.00078479	1	chip1_peak_5213
chr14	63474700	63474900	200	263.007	5.34891	0.00078479	1	chip1_peak_5214
chr1	139965800	139966000	200	263.018	5.34913	0.000989348	1	chip1_peak_6745
chr6	7949300	7949500	200	263.213	5.3531	0.000963654	1	chip1_peak_6551
chr2	85717200	85717400	200	263.369	5.35627	0.000776913	1	chip1_peak_5143
chr8	92614600	92614800	200	263.369	5.35627	0.000776913	1	chip1_peak_5144
chr14	74859600	74859800	200	263.385	5.35659	0.000157419	1	chip1_peak_995
chr6	91788600	91788800	200	263.418	5.35726	0.000835696	1	chip1_peak_5578
chr6	145733000	145733200	200	263.47	5.35832	0.000225953	1	chip1_peak_1447
chr18	80700800	80701000	200	263.577	5.3605	0.000787443	1	chip1_peak_5234
chr14	54526400	54526600	200	263.61	5.36117	0.000928827	1	chip1_peak_6280
chr14	67877100	67877300	200	263.84	5.36584	0.000624711	1	chip1_peak_4070
chr6	39348000	39348200	200	263.9	5.36707	0.000104946	1	chip1_peak_723
chr12	56795300	56795500	200	263.94	5.36789	0.000779544	1	chip1_peak_5167
chr5	8159900	8160100	200	263.94	5.36789	0.000779544	1	chip1_peak_5168
chr2	38357200	38357400	200	263.94	5.36789	0.000779544	1	chip1_peak_5169
chr10	76542100	76542300	200	264.194	5.37305	0.000737376	1	chip1_peak_4850
chr5	72192300	72192500	200	264.199	5.37316	0.000746071	1	chip1_peak_4916
chr17	47120300	47120500	200	264.304	5.37528	0.000771727	1	chip1_peak_5103
chr3	54352200	54352400	200	264.309	5.37539	0.000756854	1	chip1_peak_4995
chr4	143356600	143356800	200	264.333	5.37588	0.000720003	1	chip1_peak_4721
chr1	9132700	9132900	200	264.333	5.37588	0.000720003	1	chip1_peak_4722
chr7	80352800	80353000	200	264.35	5.37622	0.000450025	1	chip1_peak_2852
chr5	111282900	111283100	200	264.417	5.37759	0.000950283	1	chip1_peak_6453
chr6	107048500	107048700	200	264.448	5.37822	0.000892444	1	chip1_peak_5983
chr17	25520200	25520400	200	264.668	5.3827	0.000308615	1	chip1_peak_1926
chr19	8646600	8646900	300	264.687	5.38308	0.000558814	1	chip1_peak_3601
chr7	98140100	98140300	200	264.869	5.38678	0.000147881	1	chip1_peak_951
chr1	118850100	118850300	200	264.9	5.3874	0.000455745	1	chip1_peak_2895
chr13	86050700	86051000	300	264.907	5.38755	0.000723309	1	chip1_peak_4741
chr2	73080300	73080600	300	264.931	5.38804	0.000141447	1	chip1_peak_918
chr9	94520100	94520300	200	264.959	5.38861	0.000629154	1	chip1_peak_4104
chr16	23372400	23372600	200	264.96	5.38863	0.000954233	1	chip1_peak_6481
chr15	75412800	75413000	200	265.05	5.39045	0.000621286	1	chip1_peak_4040
chr1	153920700	153921000	300	265.083	5.39112	5.90266e-05	1	chip1_peak_437
chr9	43600900	43601100	200	265.213	5.39376	0.000606545	1	chip1_peak_3945
chr9	70775200	70775400	200	265.247	5.39446	0.000751823	1	chip1_peak_4957
chr1	21274200	21274400	200	265.294	5.39542	0.00071506	1	chip1_peak_4688
chr1	16759500	16759700	200	265.329	5.39614	0.000622531	1	chip1_peak_4051
chr10	83549800	83550000	200	265.333	5.39621	0.000988301	1	chip1_peak_6736
chrX	98908600	98908800	200	265.415	5.39788	0.000969123	1	chip1_peak_6590
chr18	76660900	76661100	200	265.443	5.39846	0.000645701	1	chip1_peak_4208
chr2	152753700	152753900	200	265.561	5.40086	0.000923716	1	chip1_peak_6239
chr1	160557600	160557800	200	265.562	5.40087	0.00060049	1	chip1_peak_3895
chr11	4933400	4933600	200	265.61	5.40185	0.000744299	1	chip1_peak_4899
chr9	27015000	27015200	200	265.651	5.40269	0.000592986	1	chip1_peak_3849
chr13	98732400	98732600	200	265.681	5.40329	0.000616315	1	chip1_peak_4001
chr12	104744600	104744800	200	265.764	5.40498	0.000285124	1	chip1_peak_1795
chr5	20996400	20996600	200	265.77	5.4051	0.000608611	1	chip1_peak_3957
chr18	67909300	67909600	300	265.812	5.40595	0.000273444	1	chip1_peak_1741
chr9	45402400	45402600	200	266.139	5.41261	0.000906094	1	chip1_peak_6098
chr1	80177100	80177300	200	266.242	5.41469	0.000606533	1	chip1_peak_3943
chr2	49713000	49713200	200	266.242	5.41469	0.000835553	1	chip1_peak_5575
chr4	95758900	95759100	200	266.289	5.41566	0.000242556	1	chip1_peak_1552
chr15	81757000	81757200	200	266.349	5.41688	0.000765377	1	chip1_peak_5068
chr1	135227000	135227200	200	266.352	5.41694	0.000738409	1	chip1_peak_4855
chr15	64271600	64271800	200	266.4	5.41791	0.000852996	1	chip1_peak_5695
chr11	79945800	79946000	200	266.426	5.41843	0.000350749	1	chip1_peak_2218
chr18	38701700	38701900	200	266.701	5.42403	0.000854721	1	chip1_peak_5706
chr5	36120200	36120500	300	266.787	5.42577	0.000122739	1	chip1_peak_805
chr5	128198200	128198400	200	266.796	5.42596	0.000451978	1	chip1_peak_2870
chr16	10409500	10409700	200	266.819	5.42644	0.000579239	1	chip1_peak_3736
chr2	178304600	178304800	200	266.937	5.42883	0.000822853	1	chip1_peak_5478
chr8	16072200	16072400	200	267.076	5.43166	0.000846166	1	chip1_peak_5653
chr1	71872500	71872700	200	267.255	5.4353	0.00056631	1	chip1_peak_3651
chr3	129597700	129597900	200	267.296	5.43613	0.000951553	1	chip1_peak_6465
chr10	61006600	61006800	200	267.3	5.43622	0.000710338	1	chip1_peak_4657
chr14	23776500	23776700	200	267.3	5.43622	0.000710338	1	chip1_peak_4658
chr6	128468300	128468500	200	267.3	5.43622	0.000710338	1	chip1_peak_4659
chr4	152872000	152872200	200	267.3	5.43622	0.000710338	1	chip1_peak_4660
chr1	98915400	98915600	200	267.3	5.43622	0.000710338	1	chip1_peak_4661
chr2	165068800	165069100	300	267.444	5.43915	0.000251326	1	chip1_peak_1600
chr7	66983600	66983800	200	267.451	5.43928	0.000837701	1	chip1_peak_5585
chr4	133773800	133774000	200	267.451	5.43928	0.000837701	1	chip1_peak_5586
chr17	70826700	70826900	200	267.657	5.44347	0.000689711	1	chip1_peak_4514
chr6	48997800	48998000	200	267.727	5.44491	0.000732807	1	chip1_peak_4821
chr4	63416100	63416300	200	267.837	5.44715	0.000632173	1	chip1_peak_4128
chr4	121007800	121008000	200	267.857	5.44754	0.000579257	1	chip1_peak_3737
chr8	122091600	122091800	200	267.857	5.44754	0.000579257	1	chip1_peak_3738
chr18	35313000	35313200	200	267.86	5.44761	0.000699443	1	chip1_peak_4561
chr18	80414900	80415100	200	268.027	5.451	0.000696235	1	chip1_peak_4541
chr6	103511800	103512000	200	268.049	5.45144	0.000824379	1	chip1_peak_5488
chr5	28009100	28009300	200	268.208	5.45468	0.000573494	1	chip1_peak_3690
chr6	17786300	17786500	200	268.243	5.4554	0.000692093	1	chip1_peak_4523
chr1	165153200	165153400	200	268.321	5.45698	0.000549279	1	chip1_peak_3550
chr9	29743400	29743600	200	268.345	5.45747	0.00079323	1	chip1_peak_5286
chr18	60914900	60915100	200	268.381	5.4582	0.000703056	1	chip1_peak_4591
chr1	194665200	194665400	200	268.445	5.4595	0.00055292	1	chip1_peak_3570
chr15	41231900	41232100	200	268.467	5.45994	0.000424372	1	chip1_peak_2706
chr4	8475900	8476100	200	268.559	5.46183	0.000567791	1	chip1_peak_3657
chr1	124596200	124596400	200	268.607	5.46279	0.000685195	1	chip1_peak_4484
chr4	46742600	46742800	200	268.701	5.46471	0.000656561	1	chip1_peak_4277
chr7	28886600	28886800	200	268.746	5.46563	0.000346664	1	chip1_peak_2191
chr6	72527200	72527400	200	268.769	5.46609	0.000564423	1	chip1_peak_3636
chr12	25688200	25688500	300	268.845	5.46763	0.000709499	1	chip1_peak_4646
chr13	25927400	25927600	200	268.994	5.47068	0.000555132	1	chip1_peak_3580
chr3	132883400	132883600	200	269.074	5.4723	0.000522468	1	chip1_peak_3345
chr6	94995500	94995700	200	269.084	5.47251	0.00032663	1	chip1_peak_2064
chr2	38239900	38240100	200	269.125	5.47332	0.000243215	1	chip1_peak_1554
chr9	123067600	123067800	200	269.177	5.47439	0.000827209	1	chip1_peak_5517
chr10	96985400	96985600	200	269.262	5.47612	0.000789906	1	chip1_peak_5257
chr3	27889400	27889600	200	269.281	5.47651	0.000764472	1	chip1_peak_5064
chr19	57835000	57835200	200	269.364	5.4782	0.000549322	1	chip1_peak_3551
chr8	93938500	93938700	200	269.364	5.4782	0.000590431	1	chip1_peak_3830
chr4	129419600	129419800	200	269.464	5.48023	0.000924732	1	chip1_peak_6251
chr7	50469600	50469800	200	269.491	5.48077	0.000897695	1	chip1_peak_6024
chr10	79723300	79723500	200	269.511	5.48119	0.00018443	1	chip1_peak_1164
chr2	179783400	179783600	200	269.538	5.48172	0.000120504	1	chip1_peak_792
chr13	115687500	115687700	200	269.703	5.48508	0.000672309	1	chip1_peak_4391
chr7	89559600	89559800	200	269.715	5.48533	0.000543868	1	chip1_peak_3507
chr15	101482600	101482800	200	269.715	5.48533	0.000652165	1	chip1_peak_4253
chr2	168620100	168620300	200	269.806	5.48719	0.000182619	1	chip1_peak_1153
chr4	44178600	44178800	200	269.842	5.48791	0.000547476	1	chip1_peak_3532
chr11	52643800	52644000	200	269.842	5.48791	0.000937897	1	chip1_peak_6362
chr11	61071200	61071400	200	269.867	5.48843	0.000922449	1	chip1_peak_6231
chr17	47814700	47814900	200	270.008	5.49129	0.000986873	1	chip1_peak_6722
chr1	170531600	170531800	200	270.026	5.49166	0.000206439	1	chip1_peak_1313
chr1	20756800	20757000	200	270.051	5.49217	0.000528138	1	chip1_peak_3383
chr11	9002800	9003200	400	270.053	5.49221	0.00020068	1	chip1_peak_1270
chr14	96513500	96513700	200	270.065	5.49245	0.000645306	1	chip1_peak_4205
chr8	66780400	66780600	200	270.065	5.49245	0.000645306	1	chip1_peak_4206
chr9	14015400	14015600	200	270.065	5.49245	0.000898355	1	chip1_peak_6027
chr2	6052900	6053100	200	270.066	5.49247	0.000538472	1	chip1_peak_3463
chr18	34793400	34793600	200	270.089	5.49294	0.000148367	1	chip1_peak_953
chr17	10353900	10354100	200	270.146	5.4941	0.000779394	1	chip1_peak_5166
chr13	103826900	103827100	200	270.172	5.49462	0.000447212	1	chip1_peak_2830
chr17	49165000	49165200	200	270.185	5.49489	0.000940201	1	chip1_peak_6381
chr1	144510300	144510500	200	270.274	5.49669	0.000750515	1	chip1_peak_4951
chr1	182055700	182055900	200	270.279	5.49681	0.000732549	1	chip1_peak_4814
chr2	10117000	10117300	300	270.321	5.49766	0.000226272	1	chip1_peak_1449
chr18	84000800	84001000	200	270.405	5.49936	0.000766107	1	chip1_peak_5073
chr3	138267900	138268100	200	270.542	5.50214	0.000961581	1	chip1_peak_6536
chr11	115205800	115206000	200	270.654	5.50443	0.000235766	1	chip1_peak_1508
chr11	52802300	52802500	200	270.66	5.50455	0.00064756	1	chip1_peak_4220
chr9	63845400	63845600	200	270.66	5.50455	0.000900009	1	chip1_peak_6042
chr2	165365700	165365900	200	270.66	5.50455	0.000928274	1	chip1_peak_6275
chr2	55234200	55234500	300	270.668	5.5047	0.000669877	1	chip1_peak_4365
chr15	96745500	96745700	200	270.752	5.50642	0.00012012	1	chip1_peak_790
chr16	85703200	85703400	200	270.783	5.50704	0.00014635	1	chip1_peak_942
chr1	152048300	152048500	200	270.976	5.51098	0.000524726	1	chip1_peak_3364
chr5	136099900	136100100	200	271.023	5.51194	0.000641128	1	chip1_peak_4174
chr1	163666400	163666600	200	271.023	5.51194	0.000641128	1	chip1_peak_4175
chr9	74319200	74319400	200	271.299	5.51754	0.000288556	1	chip1_peak_1817
chr6	80916400	80916600	200	271.367	5.51893	0.000622558	1	chip1_peak_4053
chr14	54961000	54961200	200	271.472	5.52107	0.000180055	1	chip1_peak_1139
chr9	110946800	110947000	200	271.667	5.52502	0.00024115	1	chip1_peak_1541
chr7	101696200	101696400	200	271.678	5.52525	0.000726981	1	chip1_peak_4769
chr13	90088800	90089000	200	271.708	5.52586	0.000288993	1	chip1_peak_1821
chr9	120988300	120988500	200	271.808	5.5279	0.0005178	1	chip1_peak_3314
chr7	36713200	36713400	200	271.808	5.5279	0.000592151	1	chip1_peak_3841
chr11	54654900	54655100	200	271.889	5.52955	0.000743981	1	chip1_peak_4894
chr1	59289100	59289300	200	271.889	5.52955	0.000743981	1	chip1_peak_4895
chr4	151703800	151704000	200	271.966	5.53112	0.000624745	1	chip1_peak_4071
chr15	81006100	81006300	200	272.01	5.532	0.000513008	1	chip1_peak_3280
chr11	98957500	98957700	200	272.124	5.53433	0.00073171	1	chip1_peak_4809
chr6	6232900	6233100	200	272.313	5.53817	0.000124492	1	chip1_peak_821
chr5	123384200	123384400	200	272.33	5.53851	0.000618551	1	chip1_peak_4019
chr5	62491700	62491900	200	272.369	5.53931	0.000509651	1	chip1_peak_3256
chr9	119908800	119909000	200	272.376	5.53945	0.000622896	1	chip1_peak_4055
chr2	150794700	150794900	200	272.485	5.54166	0.000210213	1	chip1_peak_1333
chr8	41197700	41198100	400	272.503	5.54204	5.92564e-05	1	chip1_peak_439
chr3	28096400	28096600	200	272.607	5.54416	0.000920072	1	chip1_peak_6207
chr13	24381700	24381900	200	272.666	5.54536	0.000857863	1	chip1_peak_5725
chr10	116461500	116461700	200	272.669	5.54541	0.00060065	1	chip1_peak_3896
chr8	84105700	84105900	200	272.697	5.54598	0.000113331	1	chip1_peak_765
chr8	82233000	82233300	300	272.794	5.54795	0.000266831	1	chip1_peak_1699
chr4	100382700	100382900	200	272.895	5.55001	0.000622467	1	chip1_peak_4050
chr5	20557200	20557400	200	272.958	5.55129	0.000709357	1	chip1_peak_4643
chr14	11946500	11946700	200	273.04	5.55295	0.000537309	1	chip1_peak_3455
chr9	45806600	45806800	200	273.057	5.55329	0.000874949	1	chip1_peak_5846
chr9	119750400	119750700	300	273.082	5.55382	0.000220772	1	chip1_peak_1407
chr11	68380600	68380800	200	273.249	5.55721	0.000758546	1	chip1_peak_5009
chr2	170022000	170022200	200	273.309	5.55843	0.000491163	1	chip1_peak_3126
chr10	4685200	4685400	200	273.309	5.55843	0.000588628	1	chip1_peak_3813
chr1	176870500	176870700	200	273.331	5.55888	0.00010971	1	chip1_peak_746
chr19	38208500	38208700	200	273.354	5.55933	0.000577317	1	chip1_peak_3719
chr9	83952500	83952700	200	273.393	5.56014	0.000588816	1	chip1_peak_3816
chr18	59173800	59174000	200	273.47	5.56169	0.000705932	1	chip1_peak_4619
chr7	127325700	127325900	200	273.593	5.56419	0.000160943	1	chip1_peak_1019
chr2	116197800	116198000	200	273.61	5.56454	0.000567707	1	chip1_peak_3656
chr1	10194100	10194300	200	273.633	5.56502	0.00047699	1	chip1_peak_3049
chr13	51842200	51842400	200	273.7	5.56638	0.00012984	1	chip1_peak_845
chr10	107953700	107953900	200	273.775	5.5679	0.000616661	1	chip1_peak_4003
chr15	78235600	78235800	200	273.794	5.56828	0.00064172	1	chip1_peak_4179
chr12	72366100	72366300	200	273.794	5.56828	0.000917123	1	chip1_peak_6182
chr5	64747300	64747500	200	273.983	5.57213	0.000472284	1	chip1_peak_3011
chr14	27959700	27959900	200	274.155	5.57562	0.000335722	1	chip1_peak_2118
chr16	20514000	20514200	200	274.242	5.57741	0.000717089	1	chip1_peak_4700
chr16	7098000	7098200	200	274.3	5.57857	0.000146882	1	chip1_peak_945
chr14	66247600	66247800	200	274.353	5.57965	0.000907018	1	chip1_peak_6107
chr8	124607900	124608100	200	274.382	5.58025	0.000973213	1	chip1_peak_6628
chr15	79423900	79424100	200	274.442	5.58146	0.000106613	1	chip1_peak_733
chr16	4392000	4392300	300	274.464	5.58192	0.000290147	1	chip1_peak_1826
chr2	150315400	150315600	200	274.57	5.58408	0.00047396	1	chip1_peak_3023
chr3	153946000	153946200	200	274.574	5.58415	0.000977361	1	chip1_peak_6651
chr11	117035200	117035400	200	274.746	5.58766	0.000651943	1	chip1_peak_4251
chr18	5042800	5043000	200	274.835	5.58946	0.000680743	1	chip1_peak_4455
chr1	53341700	53341900	200	274.905	5.59088	0.000547799	1	chip1_peak_3535
chr9	63056900	63057200	300	274.944	5.59168	0.000158647	1	chip1_peak_1003
chr2	104499500	104499700	200	275.11	5.59505	0.000932729	1	chip1_peak_6315
chr13	117226400	117226600	200	275.161	5.59609	0.000100862	1	chip1_peak_696
chr2	6715800	6716000	200	275.335	5.59963	0.000678871	1	chip1_peak_4443
chr5	123415300	123415500	200	275.464	5.60226	0.000531075	1	chip1_peak_3410
chr5	119144800	119145000	200	275.472	5.60241	0.000792883	1	chip1_peak_5283
chr2	144375400	144375600	200	275.575	5.6045	0.000218774	1	chip1_peak_1391
chr12	103612600	103612800	200	275.599	5.605	0.000465255	1	chip1_peak_2956
chr15	19828500	19828700	200	275.69	5.60684	0.000972157	1	chip1_peak_6615
chr5	65888400	65888600	200	275.71	5.60725	0.000873299	1	chip1_peak_5835
chr17	43083000	43083200	200	275.73	5.60766	0.000671796	1	chip1_peak_4390
chr11	3788100	3788300	200	275.832	5.60973	0.000457389	1	chip1_peak_2907
chr7	114804500	114804800	300	275.848	5.61006	0.000636081	1	chip1_peak_4150
chr7	79106200	79106400	200	275.885	5.61081	0.000269437	1	chip1_peak_1715
chr13	9382700	9382900	200	275.948	5.6121	0.000537553	1	chip1_peak_3457
chr5	75854800	75855000	200	276.053	5.61423	0.000558688	1	chip1_peak_3600
chr11	118668300	118668500	200	276.053	5.61423	0.0006301	1	chip1_peak_4111
chr5	65811100	65811300	200	276.248	5.6182	0.000173476	1	chip1_peak_1097
chr2	72193300	72193500	200	276.379	5.62086	0.000542558	1	chip1_peak_3498
chr3	101028000	101028200	200	276.417	5.62162	0.00055318	1	chip1_peak_3572
chr12	41060300	41060600	300	276.465	5.6226	0.000495967	1	chip1_peak_3163
chr14	48057600	48057900	300	276.505	5.62343	0.000106609	1	chip1_peak_732
chr7	14526700	14526900	200	276.509	5.62351	0.000146306	1	chip1_peak_941
chr18	58537700	58537900	200	276.552	5.62438	0.000497685	1	chip1_peak_3172
chr11	52277300	52277500	200	276.552	5.62438	0.00065489	1	chip1_peak_4268
chr16	76783700	76783900	200	276.555	5.62443	0.000867642	1	chip1_peak_5801
chr1	181370200	181370400	200	276.624	5.62585	0.000774557	1	chip1_peak_5122
chr8	75077200	75077400	200	276.672	5.62682	0.000451417	1	chip1_peak_2861
chr4	127863500	127863700	200	276.727	5.62793	0.000625834	1	chip1_peak_4081
chr14	25791700	25792000	300	276.755	5.62851	0.000321508	1	chip1_peak_2022
chr7	10494700	10494900	200	277.024	5.63397	0.000620762	1	chip1_peak_4037
chr10	115339100	115339300	200	277.05	5.63451	0.000735578	1	chip1_peak_4841
chr6	35032400	35032600	200	277.078	5.63507	0.000648245	1	chip1_peak_4227
chr2	5395600	5395800	200	277.078	5.63507	0.000648245	1	chip1_peak_4228
chr1	182694800	182695000	200	277.215	5.63786	0.000431015	1	chip1_peak_2742
chr8	34386500	34386800	300	277.299	5.63957	0.000521439	1	chip1_peak_3335
chr5	144519200	144519400	200	277.303	5.63965	0.000637593	1	chip1_peak_4158
chr13	73073600	73073800	200	277.394	5.64151	0.000845483	1	chip1_peak_5648
chr1	140018700	140018900	200	277.514	5.64395	0.000509878	1	chip1_peak_3259
chr12	65221900	65222200	300	277.774	5.64923	0.000622558	1	chip1_peak_4052
chr3	145737700	145737900	200	277.814	5.65004	0.000432568	1	chip1_peak_2750
chr2	130192100	130192300	200	277.955	5.65291	0.000435445	1	chip1_peak_2762
chr7	141043800	141044000	200	277.985	5.65351	0.000139114	1	chip1_peak_905
chr3	148913200	148913400	200	278.136	5.65658	0.000113882	1	chip1_peak_766
chr12	83273700	83273900	200	278.164	5.65717	0.000428324	1	chip1_peak_2733
chr8	70109400	70109600	200	278.343	5.6608	0.000834233	1	chip1_peak_5566
chr2	15697300	15697500	200	278.349	5.66093	0.000801941	1	chip1_peak_5348
chr16	31361100	31361300	200	278.378	5.66151	0.000163625	1	chip1_peak_1033
chr11	103329500	103329700	200	278.47	5.66338	0.000523118	1	chip1_peak_3352
chr15	59581100	59581300	200	278.658	5.6672	0.000426945	1	chip1_peak_2718
chr7	114039900	114040100	200	278.658	5.6672	0.000426945	1	chip1_peak_2719
chr7	132028100	132028300	200	278.658	5.6672	0.000426945	1	chip1_peak_2720
chr18	12291200	12291400	200	278.75	5.66908	0.000135637	1	chip1_peak_878
chr7	64417400	64417600	200	278.787	5.66983	0.000618932	1	chip1_peak_4024
chr15	79607300	79607500	200	278.787	5.66983	0.000624604	1	chip1_peak_4069
chr12	84497100	84497300	200	278.883	5.67178	0.000975179	1	chip1_peak_6636
chr6	39339600	39339800	200	279.05	5.67517	0.000514944	1	chip1_peak_3292
chr9	59094000	59094200	200	279.069	5.67557	0.000493503	1	chip1_peak_3143
chr11	90121900	90122100	200	279.075	5.67569	0.000417512	1	chip1_peak_2661
chr17	9899400	9899600	200	279.075	5.67569	0.000417512	1	chip1_peak_2662
chr14	34576300	34576500	200	279.076	5.67572	0.000489922	1	chip1_peak_3115
chr15	30887200	30887400	200	279.176	5.67774	0.000613308	1	chip1_peak_3982
chr1	39273100	39273300	200	279.183	5.67788	0.000109908	1	chip1_peak_748
chr15	84410500	84410700	200	279.196	5.67815	0.000612979	1	chip1_peak_3979
chr18	78133200	78133500	300	279.299	5.68025	0.000472379	1	chip1_peak_3013
chr7	79743900	79744100	200	279.361	5.6815	0.0007545	1	chip1_peak_4975
chr3	100211700	100211900	200	279.368	5.68164	0.000238728	1	chip1_peak_1528
chr11	94189100	94189300	200	279.426	5.68282	0.000413423	1	chip1_peak_2624
chr11	64353500	64353700	200	279.436	5.68302	0.000749255	1	chip1_peak_4939
chr7	142485700	142485900	200	279.454	5.6834	0.000812138	1	chip1_peak_5413
chr15	100069900	100070100	200	279.57	5.68575	0.000416174	1	chip1_peak_2650
chr9	65533700	65533900	200	279.57	5.68575	0.000416174	1	chip1_peak_2651
chr5	15778100	15778300	200	279.571	5.68577	0.000606951	1	chip1_peak_3948
chr7	127302100	127302400	300	279.816	5.69077	0.000196591	1	chip1_peak_1242
chr1	178490300	178490600	300	279.923	5.69293	0.000347421	1	chip1_peak_2194
chr14	68022800	68023100	300	280.078	5.69608	0.000368461	1	chip1_peak_2329
chr19	29711300	29711500	200	280.089	5.69631	0.000490343	1	chip1_peak_3119
chr5	148724700	148724900	200	280.097	5.69648	0.000397399	1	chip1_peak_2506
chr8	86760400	86760600	200	280.292	5.70043	0.000588214	1	chip1_peak_3808
chr5	23766400	23766600	200	280.292	5.70043	0.000786017	1	chip1_peak_5224
chr2	69303800	69304000	200	280.336	5.70134	0.000403004	1	chip1_peak_2552
chr3	138257800	138258000	200	280.356	5.70175	0.00049701	1	chip1_peak_3169
chr19	24717400	24717800	400	280.447	5.70359	7.19305e-05	1	chip1_peak_516
chr12	31426100	31426300	200	280.469	5.70403	0.000157422	1	chip1_peak_996
chr2	14821500	14821700	200	280.497	5.70461	0.000933877	1	chip1_peak_6327
chr17	45510400	45510600	200	280.833	5.71145	0.000401721	1	chip1_peak_2540
chr9	13427500	13427700	200	281.005	5.71495	0.000142827	1	chip1_peak_924
chr6	31558000	31558200	200	281.083	5.71653	0.00048732	1	chip1_peak_3103
chr12	30741600	30741800	200	281.108	5.71703	0.000733575	1	chip1_peak_4827
chr1	32932500	32932700	200	281.256	5.72004	0.000122328	1	chip1_peak_801
chr16	11652400	11652700	300	281.272	5.72038	0.00015488	1	chip1_peak_981
chr18	30398000	30398200	200	281.293	5.72081	0.000580038	1	chip1_peak_3743
chr2	14858300	14858500	200	281.408	5.72313	0.000736236	1	chip1_peak_4845
chr5	37311200	37311400	200	281.714	5.72936	0.000200856	1	chip1_peak_1273
chr9	25327200	25327400	200	281.773	5.73056	0.00068843	1	chip1_peak_4508
chr11	51673900	51674200	300	282.008	5.73534	0.000579324	1	chip1_peak_3739
chr7	93323900	93324100	200	282.135	5.73792	0.000475517	1	chip1_peak_3033
chr4	154531700	154531900	200	282.258	5.74043	0.000399421	1	chip1_peak_2519
chr4	143059100	143059300	200	282.502	5.74539	0.000555843	1	chip1_peak_3585
chr8	114259800	114260100	300	282.608	5.74754	0.000353759	1	chip1_peak_2237
chr13	56228100	56228300	200	282.773	5.75089	0.000465552	1	chip1_peak_2959
chr4	109046600	109046800	200	282.79	5.75125	9.25501e-05	1	chip1_peak_644
chr7	137750900	137751200	300	282.85	5.75246	0.000250195	1	chip1_peak_1594
chr1	62198600	62198800	200	282.876	5.753	0.00096182	1	chip1_peak_6539
chr10	128637700	128637900	200	283.136	5.75828	0.000461006	1	chip1_peak_2934
chr16	24270200	24270400	200	283.136	5.75828	0.000461006	1	chip1_peak_2935
chr15	52580000	52580200	200	283.136	5.75828	0.000461006	1	chip1_peak_2936
chr3	61096600	61096800	200	283.136	5.75828	0.000461006	1	chip1_peak_2937
chr12	73848300	73848600	300	283.137	5.75831	0.000810465	1	chip1_peak_5403
chr16	46415400	46415600	200	283.17	5.75898	0.000376363	1	chip1_peak_2381
chr19	53852000	53852300	300	283.401	5.76367	2.95514e-05	0.993526	chip1_peak_262
chr2	112260000	112260200	200	283.5	5.76568	0.000456506	1	chip1_peak_2900
chr16	35285100	35285300	200	283.5	5.76568	0.000790785	1	chip1_peak_5267
chr8	91542700	91542900	200	283.579	5.7673	0.000368079	1	chip1_peak_2327
chr4	149575800	149576100	300	283.601	5.76773	0.000201559	1	chip1_peak_1279
chr2	91703500	91703700	200	283.906	5.77394	9.26934e-05	1	chip1_peak_645
chr6	146314400	146314600	200	283.909	5.77401	0.000152839	1	chip1_peak_974
chr15	84794800	84795000	200	284.243	5.7808	0.000616591	1	chip1_peak_4002
chr15	34678300	34678500	200	284.269	5.78133	0.000639465	1	chip1_peak_4169
chr14	34515900	34516100	200	284.3	5.78195	0.000758271	1	chip1_peak_5007
chr1	144270100	144270300	200	284.434	5.78468	0.000348099	1	chip1_peak_2200
chr6	53322400	53322600	200	284.443	5.78486	0.000445041	1	chip1_peak_2818
chr3	36655800	36656000	200	284.443	5.78486	0.000445041	1	chip1_peak_2819
chr11	5570200	5570400	200	284.651	5.78909	0.000357251	1	chip1_peak_2262
chr7	81052800	81053000	200	284.804	5.79221	0.00049351	1	chip1_peak_3144
chr6	17356200	17356400	200	285.002	5.79622	0.000534196	1	chip1_peak_3427
chr13	17888600	17888800	200	285.189	5.80004	0.000943503	1	chip1_peak_6406
chr6	116180400	116180600	200	285.233	5.80093	5.23212e-05	1	chip1_peak_394
chr2	31952700	31952900	200	285.349	5.80328	8.92552e-05	1	chip1_peak_625
chr5	46191900	46192100	200	285.352	5.80336	0.000997985	1	chip1_peak_6812
chr6	122346400	122346600	200	285.386	5.80404	0.000433878	1	chip1_peak_2754
chr11	26354300	26354500	200	285.509	5.80654	0.000906852	1	chip1_peak_6103
chr10	98089400	98089600	200	285.732	5.81108	0.000516329	1	chip1_peak_3302
chr17	56054300	56054500	200	285.765	5.81175	4.41822e-05	1	chip1_peak_338
chr9	121930400	121930800	400	285.9	5.81449	5.58222e-05	1	chip1_peak_419
chr8	17696700	17696900	200	285.939	5.81528	0.000855637	1	chip1_peak_5710
chr2	168303100	168303400	300	286.026	5.81706	0.000237451	1	chip1_peak_1518
chr7	25887400	25887700	300	286.05	5.81754	0.000264942	1	chip1_peak_1685
chr9	32058200	32058400	200	286.225	5.8211	0.000345671	1	chip1_peak_2183
chr5	114628500	114628700	200	286.419	5.82505	0.000343865	1	chip1_peak_2169
chr2	128456300	128456500	200	286.423	5.82513	0.00041305	1	chip1_peak_2622
chr15	101818400	101818600	200	286.482	5.82633	0.000506317	1	chip1_peak_3232
chr19	14520400	14520600	200	286.496	5.82661	0.000421119	1	chip1_peak_2682
chr6	88582700	88582900	200	286.496	5.82661	0.000452728	1	chip1_peak_2875
chr7	112365600	112365800	200	286.512	5.82694	0.000917985	1	chip1_peak_6187
chr10	62431300	62431500	200	286.857	5.83395	0.000803267	1	chip1_peak_5356
chr1	125052100	125052300	200	286.859	5.83401	0.000469278	1	chip1_peak_2994
chr1	193110400	193110600	200	286.859	5.83401	0.000534726	1	chip1_peak_3433
chr12	109844300	109844500	200	286.859	5.83401	0.000922011	1	chip1_peak_6222
chr7	46461600	46461800	200	287.047	5.83783	0.00021226	1	chip1_peak_1348
chr1	38033900	38034100	200	287.065	5.83819	0.000155877	1	chip1_peak_985
chr9	65118300	65118500	200	287.122	5.83935	0.000351686	1	chip1_peak_2223
chr8	126621800	126622000	200	287.141	5.83973	0.000942356	1	chip1_peak_6395
chr4	138384800	138385000	200	287.147	5.83986	0.000452552	1	chip1_peak_2874
chr1	177186800	177187000	200	287.261	5.84217	0.000613494	1	chip1_peak_3984
chr6	143745100	143745300	200	287.312	5.8432	0.000387606	1	chip1_peak_2442
chr2	180513300	180513500	200	287.509	5.84722	0.000815472	1	chip1_peak_5428
chr16	91556500	91556800	300	287.532	5.84768	0.000311022	1	chip1_peak_1943
chr7	145138900	145139100	200	287.714	5.8514	0.000265823	1	chip1_peak_1689
chr6	23118400	23118600	200	287.803	5.85319	0.000406603	1	chip1_peak_2575
chr3	17151700	17151900	200	287.803	5.85319	0.000406603	1	chip1_peak_2576
chr6	146241500	146241700	200	287.894	5.85505	0.000530768	1	chip1_peak_3405
chr12	86356700	86356900	200	288.087	5.85897	0.000394947	1	chip1_peak_2489
chr2	142250200	142250400	200	288.112	5.85948	0.000577686	1	chip1_peak_3726
chr17	72326700	72326900	200	288.166	5.86058	0.00040266	1	chip1_peak_2549
chr14	24520200	24520400	200	288.166	5.86058	0.00040266	1	chip1_peak_2550
chr9	21776100	21776300	200	288.166	5.86058	0.00040266	1	chip1_peak_2551
chr4	136530700	136530900	200	288.245	5.86218	0.000324731	1	chip1_peak_2042
chr7	79083000	79083200	200	288.518	5.86773	0.000314064	1	chip1_peak_1967
chr16	74049000	74049200	200	288.595	5.8693	0.000323762	1	chip1_peak_2037
chr19	5320400	5320600	200	288.6	5.8694	0.000479125	1	chip1_peak_3058
chr14	121851800	121852000	200	288.6	5.8694	0.000591083	1	chip1_peak_3835
chr9	74819800	74820000	200	288.746	5.87238	0.000671421	1	chip1_peak_4387
chr16	91278400	91278600	200	288.756	5.87258	0.000719315	1	chip1_peak_4716
chr2	92353700	92353900	200	288.813	5.87374	8.99472e-05	1	chip1_peak_627
chr8	113903500	113903700	200	289.107	5.87972	0.00056856	1	chip1_peak_3663
chr16	86706500	86706700	200	289.107	5.87972	0.000863558	1	chip1_peak_5767
chr9	71040200	71040400	200	289.109	5.87976	0.000422245	1	chip1_peak_2690
chr3	99928600	99928800	200	289.136	5.88031	0.000805941	1	chip1_peak_5376
chr10	115363500	115363700	200	289.155	5.8807	0.000315261	1	chip1_peak_1979
chr10	125141300	125141500	200	289.193	5.88147	0.000476931	1	chip1_peak_3047
chr2	47002000	47002300	300	289.255	5.88273	0.000192309	1	chip1_peak_1204
chr5	21836000	21836300	300	289.352	5.8847	0.000544851	1	chip1_peak_3515
chr17	66910000	66910300	300	289.47	5.8871	0.000120815	1	chip1_peak_793
chr9	122005200	122005400	200	289.501	5.88773	0.000557739	1	chip1_peak_3595
chr13	55882700	55882900	200	289.506	5.88783	0.000312216	1	chip1_peak_1955
chr11	99308300	99308500	200	289.506	5.88783	0.000312216	1	chip1_peak_1956
chr1	153969700	153969900	200	289.506	5.88783	0.000312216	1	chip1_peak_1957
chr1	64337700	64337900	200	289.774	5.89329	0.000459541	1	chip1_peak_2923
chr6	45451200	45451400	200	289.981	5.8975	0.000498486	1	chip1_peak_3180
chr5	122781100	122781300	200	290.019	5.89827	0.000311269	1	chip1_peak_1945
chr5	29382900	29383200	300	290.212	5.90219	8.67041e-05	1	chip1_peak_608
chr7	137377000	137377200	200	290.219	5.90234	0.00092405	1	chip1_peak_6243
chr3	129509900	129510200	300	290.226	5.90247	0.000358934	1	chip1_peak_2272
chr7	40894200	40894400	200	290.479	5.90763	0.00035046	1	chip1_peak_2216
chr11	72700500	72700700	200	290.495	5.90795	0.000370215	1	chip1_peak_2343
chr6	101252900	101253100	200	290.561	5.90929	0.000306653	1	chip1_peak_1916
chr1	193114400	193114600	200	290.857	5.91531	0.000366639	1	chip1_peak_2316
chr4	95968600	95968800	200	291.093	5.9201	0.000832897	1	chip1_peak_5559
chr10	125166200	125166400	200	291.217	5.92263	0.000676459	1	chip1_peak_4423
chr16	24063100	24063300	200	291.241	5.92311	5.83234e-05	1	chip1_peak_432
chr15	100072000	100072200	200	291.251	5.92333	0.000268168	1	chip1_peak_1707
chr15	103375400	103375600	200	291.691	5.93226	0.000442171	1	chip1_peak_2804
chr3	38406700	38406900	200	291.691	5.93226	0.000804222	1	chip1_peak_5363
chr1	84256400	84256600	200	291.75	5.93347	0.000400153	1	chip1_peak_2524
chr15	84762200	84762400	200	291.797	5.93443	0.000357526	1	chip1_peak_2263
chr14	75180300	75180500	200	291.797	5.93443	0.000357526	1	chip1_peak_2264
chr8	62768100	62768400	300	291.805	5.93459	0.000453815	1	chip1_peak_2882
chr3	78005400	78005600	200	291.839	5.93527	0.000584309	1	chip1_peak_3764
chr15	7004300	7004500	200	292.005	5.93865	0.000294697	1	chip1_peak_1851
chr4	25468400	25468600	200	292.256	5.94376	0.000899171	1	chip1_peak_6034
chr2	75459800	75460000	200	292.275	5.94415	0.000419909	1	chip1_peak_2675
chr8	116238600	116238800	200	292.441	5.94751	0.000458902	1	chip1_peak_2921
chr19	34231700	34231900	200	292.441	5.94751	0.000767988	1	chip1_peak_5082
chr8	98264600	98264800	200	292.782	5.95446	0.000709903	1	chip1_peak_4647
chr15	3636400	3636600	200	292.84	5.95563	0.000275499	1	chip1_peak_1754
chr10	106601100	106601300	200	293.039	5.95968	0.000427008	1	chip1_peak_2721
chr1	85831000	85831200	200	293.196	5.96287	0.000352033	1	chip1_peak_2227
chr11	119735500	119735700	200	293.2	5.96296	0.000768632	1	chip1_peak_5090
chr4	47007400	47007600	200	293.413	5.9673	0.000422889	1	chip1_peak_2697
chr10	41714800	41715100	300	293.432	5.96767	0.000136491	1	chip1_peak_888
chr7	79137800	79138000	200	293.455	5.96815	6.75561e-05	1	chip1_peak_489
chr1	4627700	4627900	200	293.788	5.97492	0.000689208	1	chip1_peak_4511
chr6	84387600	84387800	200	294.167	5.98263	0.000340679	1	chip1_peak_2152
chr8	84231200	84231400	200	294.205	5.9834	0.000607344	1	chip1_peak_3950
chr4	125796000	125796300	300	294.646	5.99236	0.000286227	1	chip1_peak_1802
chr18	82499700	82499900	200	294.883	5.99719	0.000272299	1	chip1_peak_1731
chr15	78193800	78194000	200	294.973	5.99902	0.000602946	1	chip1_peak_3918
chr3	100172300	100172500	200	295.199	6.00361	0.000171367	1	chip1_peak_1081
chr9	51440500	51440700	200	295.249	6.00463	0.000346334	1	chip1_peak_2189
chr8	104623600	104623800	200	295.332	6.00631	0.000282489	1	chip1_peak_1782
chr6	5095900	5096100	200	295.361	6.00692	0.000637363	1	chip1_peak_4157
chr16	18728100	18728300	200	295.531	6.01037	0.000589703	1	chip1_peak_3824
chr1	175472100	175472300	200	296.192	6.02381	0.000325098	1	chip1_peak_2046
chr11	100400100	100400300	200	296.227	6.02451	0.000385772	1	chip1_peak_2428
chr5	148989100	148989300	200	296.829	6.03676	0.000614183	1	chip1_peak_3988
chr4	8808400	8808600	200	296.869	6.03757	0.000257898	1	chip1_peak_1639
chr14	31459200	31459400	200	297.122	6.04273	0.000634532	1	chip1_peak_4140
chr2	121472300	121472500	200	297.22	6.04472	0.000255433	1	chip1_peak_1625
chr7	104586200	104586400	200	297.254	6.04541	0.000383024	1	chip1_peak_2416
chr7	81682600	81682800	200	297.955	6.05967	0.00024749	1	chip1_peak_1574
chr8	109010000	109010200	200	297.981	6.06019	0.000831483	1	chip1_peak_5543
chr2	31565000	31565200	200	298.306	6.0668	0.000245128	1	chip1_peak_1563
chr3	21511900	21512100	200	298.609	6.07296	0.000460933	1	chip1_peak_2933
chr6	147546500	147546700	200	298.609	6.07296	0.000949016	1	chip1_peak_6441
chr9	123019700	123019900	200	298.636	6.07351	6.48946e-05	1	chip1_peak_470
chr14	70586100	70586300	200	298.725	6.07533	0.000227675	1	chip1_peak_1462
chr5	21154200	21154400	200	298.855	6.07797	0.000296266	1	chip1_peak_1861
chr12	112187300	112187500	200	298.972	6.08035	0.000659743	1	chip1_peak_4298
chr17	24032400	24032700	300	299.203	6.08504	0.000196761	1	chip1_peak_1243
chr4	16208300	16208500	200	299.236	6.08571	0.000549052	1	chip1_peak_3547
chr8	41181200	41181400	200	299.263	6.08626	0.00046776	1	chip1_peak_2984
chr8	26390200	26390400	200	299.296	6.08693	0.000957138	1	chip1_peak_6508
chr4	105405900	105406100	200	299.586	6.09284	0.000296222	1	chip1_peak_1860
chr19	48654000	48654300	300	299.638	6.09389	0.000307026	1	chip1_peak_1918
chr17	50602400	50602700	300	300.149	6.10429	6.39747e-05	1	chip1_peak_464
chr14	90677700	90678000	300	300.226	6.10584	0.0006561	1	chip1_peak_4274
chr4	89628100	89628300	200	300.519	6.11181	0.000283499	1	chip1_peak_1787
chr7	101430300	101430500	200	300.547	6.11239	0.000222848	1	chip1_peak_1421
chr2	43970300	43970600	300	300.682	6.11512	0.000270154	1	chip1_peak_1721
chr15	85217400	85217600	200	300.848	6.11849	0.000228712	1	chip1_peak_1467
chr11	112602400	112602600	200	300.9	6.11957	0.000927884	1	chip1_peak_6273
chr13	48909300	48909500	200	300.94	6.12038	0.000915574	1	chip1_peak_6168
chr13	119694400	119694600	200	301.198	6.12561	0.000416014	1	chip1_peak_2644
chr3	69957600	69957800	200	301.459	6.13093	0.000276546	1	chip1_peak_1761
chr4	141197200	141197400	200	301.892	6.13973	0.000879577	1	chip1_peak_5878
chr11	118127100	118127300	200	302.017	6.14227	0.000179319	1	chip1_peak_1136
chr16	94097300	94097500	200	302.127	6.1445	0.000788077	1	chip1_peak_5238
chr3	119418700	119418900	200	302.761	6.1574	0.000261003	1	chip1_peak_1661
chr7	36964700	36964900	200	302.764	6.15747	0.000400145	1	chip1_peak_2523
chr4	150380800	150381000	200	302.892	6.16007	0.00027242	1	chip1_peak_1733
chr13	59112100	59112400	300	302.957	6.16138	0.000286941	1	chip1_peak_1807
chr13	95434600	95434800	200	303.18	6.16594	0.00045636	1	chip1_peak_2897
chr17	5503400	5503600	200	303.213	6.16659	0.000450026	1	chip1_peak_2853
chr11	101744500	101744700	200	303.307	6.16851	0.000604925	1	chip1_peak_3932
chr10	94597100	94597400	300	304.03	6.18321	0.000136319	1	chip1_peak_886
chr12	31542200	31542400	200	304.091	6.18445	0.000209424	1	chip1_peak_1331
chr1	62561500	62561700	200	304.186	6.18638	0.000320776	1	chip1_peak_2016
chr2	169605600	169605800	200	304.472	6.1922	0.000950925	1	chip1_peak_6459
chr14	74914200	74914400	200	304.582	6.19444	0.000260608	1	chip1_peak_1657
chr6	58737700	58737900	200	304.793	6.19872	0.000205481	1	chip1_peak_1306
chr17	65757300	65757500	200	304.945	6.20183	0.000258139	1	chip1_peak_1640
chr9	32607300	32607500	200	304.945	6.20183	0.000258139	1	chip1_peak_1641
chr13	44687500	44687700	200	304.982	6.20258	0.000204427	1	chip1_peak_1297
chr9	83227600	83227800	200	306.637	6.23624	0.000832561	1	chip1_peak_5556
chr2	27435700	27435900	200	306.808	6.23971	0.000896384	1	chip1_peak_6015
chr8	123456100	123456300	200	306.818	6.23991	0.000628664	1	chip1_peak_4099
chr13	90899400	90899700	300	306.876	6.2411	0.000177393	1	chip1_peak_1119
chr11	20491700	20492100	400	307.309	6.2499	0.000528769	1	chip1_peak_3389
chr14	84786600	84786800	200	307.319	6.25009	0.000748505	1	chip1_peak_4934
chr7	99587200	99587400	200	307.717	6.2582	0.000123283	1	chip1_peak_811
chr19	44563800	44564000	200	307.86	6.26111	0.000191413	1	chip1_peak_1199
chr2	167238900	167239100	200	308.186	6.26773	0.000653448	1	chip1_peak_4263
chr13	9481000	9481300	300	308.319	6.27045	0.000396951	1	chip1_peak_2503
chr18	73548000	73548200	200	308.415	6.2724	0.000626847	1	chip1_peak_4088
chr11	86213700	86214000	300	308.637	6.2769	0.000493049	1	chip1_peak_3139
chr5	37105800	37106000	200	308.688	6.27795	0.000844977	1	chip1_peak_5642
chr3	31088800	31089100	300	308.777	6.27976	0.000368055	1	chip1_peak_2326
chr5	29010000	29010200	200	308.959	6.28346	0.000649545	1	chip1_peak_4236
chr3	88303800	88304000	200	309.114	6.28661	0.000342073	1	chip1_peak_2159
chr5	52891700	52891900	200	309.506	6.29458	0.000512461	1	chip1_peak_3277
chr12	30550700	30550900	200	309.612	6.29673	0.000228535	1	chip1_peak_1466
chr15	34263500	34263700	200	310.197	6.30863	0.000345249	1	chip1_peak_2180
chr5	142397000	142397200	200	310.201	6.30871	0.00026092	1	chip1_peak_1660
[truncated: 506 more rows]

## Sheet: Snhg3
chr	start	end	length	signal value	fold change	p-value	Benjamini-Hochberg FDR	peak name
chr18	42290400	42290600	200	220.377	4.00015	0.000310441	0.540015	chip2_peak_5399
chr12	46641400	46641600	200	220.406	4.00067	0.000705529	0.633391	chip2_peak_10840
chr6	136553400	136553600	200	220.412	4.00079	0.000684677	0.631413	chip2_peak_10540
chr11	62313300	62313500	200	220.455	4.00157	0.000441636	0.586251	chip2_peak_7159
chr19	30874000	30874200	200	220.483	4.00208	0.000525682	0.60409	chip2_peak_8326
chr13	23889100	23889300	200	220.498	4.00235	0.000134924	0.420946	chip2_peak_2910
chr1	42705600	42705800	200	220.536	4.00305	0.000244854	0.505427	chip2_peak_4488
chr14	74929600	74929800	200	220.547	4.00325	0.000134574	0.420265	chip2_peak_2906
chr7	126942800	126943000	200	220.562	4.00351	0.000959607	0.657711	chip2_peak_14340
chr6	19296300	19296500	200	220.609	4.00436	0.000495798	0.598657	chip2_peak_7919
chr11	104521800	104522100	300	220.63	4.00475	0.000296907	0.533462	chip2_peak_5220
chr13	21937000	21937400	400	220.634	4.00482	4.41972e-08	0.00465176	chip2_peak_67
chr5	43102000	43102400	400	220.649	4.00509	2.51627e-05	0.213367	chip2_peak_1007
chr1	194991400	194991600	200	220.665	4.00537	0.000547992	0.608109	chip2_peak_8669
chr17	47651400	47651600	200	220.672	4.0055	0.000727365	0.63839	chip2_peak_11092
chr3	131257000	131257200	200	220.675	4.00556	0.000205948	0.483028	chip2_peak_3947
chr8	92427800	92428000	200	220.712	4.00624	0.000742419	0.638827	chip2_peak_11335
chr8	69368800	69369000	200	220.762	4.00715	0.000623391	0.623754	chip2_peak_9681
chr6	102952600	102952800	200	220.767	4.00723	0.000946038	0.656668	chip2_peak_14146
chr2	39332600	39332800	200	220.767	4.00723	0.000955017	0.657417	chip2_peak_14278
chr6	25781000	25781200	200	220.791	4.00767	0.000168307	0.450142	chip2_peak_3427
chr13	106916700	106916900	200	220.842	4.00859	0.000738508	0.638733	chip2_peak_11273
chr3	152723300	152723500	200	220.85	4.00873	0.000623503	0.623754	chip2_peak_9682
chr1	34859100	34859300	200	220.892	4.0095	0.000907548	0.65458	chip2_peak_13594
chr8	109716200	109716400	200	220.951	4.01057	0.000618482	0.622723	chip2_peak_9614
chr11	82141100	82141300	200	220.979	4.01108	0.000785882	0.643976	chip2_peak_11900
chr9	105401900	105402100	200	220.995	4.01137	0.000949731	0.656758	chip2_peak_14207
chr4	119919700	119919900	200	221.044	4.01226	0.000932246	0.654719	chip2_peak_13980
chr6	112740000	112740200	200	221.046	4.0123	9.20122e-05	0.365957	chip2_peak_2261
chr6	27883900	27884100	200	221.06	4.01256	7.07908e-05	0.335892	chip2_peak_1867
chr13	24173900	24174100	200	221.072	4.01277	0.000236786	0.501062	chip2_peak_4382
chr6	107698500	107698700	200	221.096	4.01321	0.000995701	0.659594	chip2_peak_14853
chr16	92348700	92349100	400	221.114	4.01353	0.000208282	0.485208	chip2_peak_3970
chr2	51719200	51719400	200	221.116	4.01356	0.000440125	0.585745	chip2_peak_7138
chr12	110410600	110410900	300	221.145	4.0141	7.14253e-05	0.336702	chip2_peak_1884
chr7	122414600	122414900	300	221.193	4.01496	0.000797739	0.645299	chip2_peak_12077
chr5	134193700	134193900	200	221.217	4.0154	0.000778263	0.643976	chip2_peak_11779
chr16	16307700	16308100	400	221.223	4.01551	2.99038e-05	0.230452	chip2_peak_1113
chr17	3119400	3119600	200	221.227	4.01558	0.000574523	0.612507	chip2_peak_9050
chr15	73429300	73429500	200	221.234	4.0157	0.000990436	0.658878	chip2_peak_14787
chr7	43477700	43477900	200	221.234	4.0157	0.000990436	0.658878	chip2_peak_14788
chr6	101348700	101348900	200	221.259	4.01617	0.000703973	0.633103	chip2_peak_10824
chr1	8184900	8185100	200	221.274	4.01644	0.000927488	0.65458	chip2_peak_13905
chr19	41789600	41789800	200	221.296	4.01683	0.000387599	0.569636	chip2_peak_6434
chr5	33918700	33919000	300	221.311	4.0171	0.000254366	0.512067	chip2_peak_4617
chr1	131329300	131329500	200	221.325	4.01735	0.000325871	0.549001	chip2_peak_5586
chr1	116570000	116570200	200	221.349	4.01779	0.000504457	0.599984	chip2_peak_8033
chr19	53553400	53553600	200	221.366	4.01809	0.000128897	0.412917	chip2_peak_2834
chr16	17056000	17056200	200	221.371	4.01819	0.000985199	0.658415	chip2_peak_14714
chr8	47825600	47825800	200	221.435	4.01936	0.000551865	0.609269	chip2_peak_8718
chr9	100084700	100084900	200	221.44	4.01944	0.000982591	0.658053	chip2_peak_14681
chr1	189344300	189344500	200	221.47	4.01999	0.000389889	0.569938	chip2_peak_6473
chr3	64981900	64982100	200	221.492	4.02039	0.000295752	0.532796	chip2_peak_5203
chr6	71428900	71429100	200	221.496	4.02046	0.000421695	0.580852	chip2_peak_6890
chr9	119734100	119734300	200	221.496	4.02046	0.000657184	0.628032	chip2_peak_10157
chr7	68297400	68297600	200	221.497	4.02049	0.000550414	0.609223	chip2_peak_8690
chr14	74762700	74763000	300	221.54	4.02126	0.000177946	0.458948	chip2_peak_3567
chr12	21340000	21340300	300	221.547	4.02139	0.000431918	0.583311	chip2_peak_7029
chr12	40751900	40752100	200	221.559	4.02161	0.000548968	0.608737	chip2_peak_8675
chr11	25860200	25860400	200	221.587	4.02211	0.000431936	0.583311	chip2_peak_7031
chr4	125003000	125003200	200	221.591	4.02219	0.00021042	0.485669	chip2_peak_4007
chr1	119160700	119161000	300	221.598	4.02232	0.000151381	0.437287	chip2_peak_3156
chr15	30216000	30216300	300	221.601	4.02236	0.000301733	0.535644	chip2_peak_5279
chr15	26552000	26552200	200	221.614	4.02261	0.000419489	0.580397	chip2_peak_6855
chr6	72318700	72318900	200	221.628	4.02287	0.000715232	0.635167	chip2_peak_10956
chr17	26646700	26646900	200	221.642	4.02311	7.20825e-05	0.337407	chip2_peak_1902
chr7	57358100	57358400	300	221.649	4.02325	0.000182961	0.464414	chip2_peak_3630
chr5	15462600	15462800	200	221.673	4.02368	0.00041839	0.579689	chip2_peak_6849
chr3	89015100	89015300	200	221.783	4.02567	0.000692386	0.632282	chip2_peak_10650
chr7	34968400	34968700	300	221.807	4.0261	0.000483132	0.594394	chip2_peak_7768
chr9	63881200	63881500	300	221.81	4.02616	0.000443111	0.586859	chip2_peak_7179
chr6	120495200	120495400	200	221.814	4.02623	0.000405107	0.573945	chip2_peak_6686
chr4	153450000	153450200	200	221.854	4.02697	0.000530187	0.605076	chip2_peak_8391
chr15	83481500	83481700	200	221.863	4.02713	0.000387775	0.569636	chip2_peak_6437
chr15	66270400	66270600	200	221.869	4.02723	0.000777032	0.643976	chip2_peak_11760
chr12	112255800	112256100	300	221.873	4.0273	0.000304289	0.536517	chip2_peak_5318
chr1	121439600	121439900	300	221.993	4.02948	0.000356812	0.56046	chip2_peak_6024
chr16	48996000	48996200	200	221.995	4.02952	0.000592015	0.617171	chip2_peak_9265
chr14	12100200	12100500	300	222.006	4.02972	9.10132e-06	0.127638	chip2_peak_600
chr11	95279600	95279800	200	222.023	4.03003	0.000797141	0.645299	chip2_peak_12067
chr7	28420100	28420300	200	222.03	4.03015	0.000254634	0.512137	chip2_peak_4622
chr6	51175500	51175700	200	222.058	4.03066	0.000590458	0.617162	chip2_peak_9242
chr6	73387000	73387200	200	222.12	4.0318	0.000588906	0.616903	chip2_peak_9219
chr13	60286000	60286200	200	222.146	4.03226	0.000590565	0.617171	chip2_peak_9243
chr12	51815800	51816000	200	222.153	4.03239	0.000769469	0.643615	chip2_peak_11660
chr17	51587900	51588100	200	222.153	4.03239	0.000769469	0.643615	chip2_peak_11661
chr11	109580900	109581100	200	222.176	4.03281	0.000748813	0.639926	chip2_peak_11423
chr7	77860000	77860200	200	222.178	4.03284	0.000954742	0.657417	chip2_peak_14267
chr11	113680700	113681000	300	222.19	4.03306	0.000815005	0.646726	chip2_peak_12325
chr8	116832600	116832800	200	222.207	4.03336	0.000475795	0.592903	chip2_peak_7663
chr17	32715800	32716000	200	222.213	4.03348	0.00097921	0.658047	chip2_peak_14625
chr11	4754800	4755000	200	222.245	4.03405	0.000320545	0.546023	chip2_peak_5521
chr18	4675200	4675400	200	222.285	4.03478	0.000765416	0.64317	chip2_peak_11606
chr5	139959500	139959900	400	222.286	4.0348	1.99889e-05	0.191543	chip2_peak_881
chr3	124228000	124228200	200	222.302	4.03509	0.000319707	0.545479	chip2_peak_5513
chr14	33953200	33953400	200	222.307	4.03519	0.00074487	0.639086	chip2_peak_11369
chr18	42121600	42121800	200	222.307	4.03519	0.00074487	0.639086	chip2_peak_11370
chr15	27792900	27793100	200	222.315	4.03534	0.000105968	0.384489	chip2_peak_2492
chr6	38826900	38827100	200	222.321	4.03544	0.000290871	0.531461	chip2_peak_5120
chr4	148293300	148293600	300	222.333	4.03566	0.000618537	0.622723	chip2_peak_9616
chr3	123759300	123759500	200	222.334	4.03567	0.000746974	0.639428	chip2_peak_11401
chr17	88041400	88041600	200	222.377	4.03646	0.000290112	0.531461	chip2_peak_5105
chr1	6330500	6330700	200	222.396	4.0368	0.000282407	0.528259	chip2_peak_4994
chr18	70093900	70094100	200	222.42	4.03724	0.000971458	0.657711	chip2_peak_14516
chr6	108619300	108619500	200	222.42	4.03724	0.000971458	0.657711	chip2_peak_14517
chr8	108134600	108134800	200	222.42	4.03724	0.000971458	0.657711	chip2_peak_14518
chr9	72170300	72170500	200	222.439	4.03758	0.000740948	0.638827	chip2_peak_11310
chr7	66399100	66399300	200	222.442	4.03763	0.000882759	0.651913	chip2_peak_13278
chr3	108327700	108327900	200	222.484	4.03839	0.000553169	0.609845	chip2_peak_8732
chr1	90824900	90825100	200	222.489	4.03849	0.000968889	0.657711	chip2_peak_14479
chr5	20924500	20924700	200	222.509	4.03886	0.000880426	0.651913	chip2_peak_13240
chr2	85045900	85046100	200	222.512	4.0389	0.0009428	0.65602	chip2_peak_14114
chr8	109668600	109669000	400	222.557	4.03972	9.75519e-06	0.133104	chip2_peak_618
chr15	30940300	30940500	200	222.558	4.03974	0.000966326	0.657711	chip2_peak_14437
chr19	21847000	21847200	200	222.558	4.03974	0.000966326	0.657711	chip2_peak_14438
chr5	129602300	129602500	200	222.598	4.04047	0.000816614	0.646865	chip2_peak_12348
chr12	29181100	29181300	200	222.603	4.04055	0.000477877	0.592997	chip2_peak_7697
chr5	45220800	45221000	200	222.64	4.04123	0.000686388	0.631413	chip2_peak_10569
chr6	104914900	104915100	200	222.649	4.0414	0.000937821	0.655357	chip2_peak_14049
chr16	8689900	8690100	200	222.658	4.04156	0.000172406	0.45392	chip2_peak_3490
chr5	33752800	33753000	200	222.732	4.0429	0.000388874	0.569818	chip2_peak_6452
chr4	12016300	12016500	200	222.77	4.04359	0.000682778	0.631012	chip2_peak_10518
chr4	56036600	56036800	200	222.773	4.04364	0.000398474	0.572401	chip2_peak_6592
chr5	27197500	27197700	200	222.79	4.04396	0.000507454	0.600207	chip2_peak_8081
chr4	10706600	10706800	200	222.852	4.04508	0.000506123	0.600109	chip2_peak_8062
chr9	9034600	9034800	200	222.864	4.0453	6.82733e-05	0.332482	chip2_peak_1814
chr2	117347000	117347200	200	222.89	4.04576	0.00080553	0.646243	chip2_peak_12172
chr3	58521500	58521700	200	222.914	4.04621	0.000288059	0.530927	chip2_peak_5068
chr5	65483500	65483700	200	222.954	4.04694	0.000210561	0.485669	chip2_peak_4011
chr17	74605400	74605600	200	222.975	4.04731	0.000503471	0.599984	chip2_peak_8016
chr13	108312200	108312400	200	223	4.04777	0.000504887	0.599984	chip2_peak_8041
chr2	84878000	84878200	200	223.01	4.04795	0.000444867	0.587523	chip2_peak_7201
chr1	179545200	179545500	300	223.043	4.04855	0.000126356	0.410169	chip2_peak_2794
chr11	43599700	43599900	200	223.048	4.04864	0.000657508	0.628032	chip2_peak_10162
chr10	114794100	114794400	300	223.068	4.049	0.00038949	0.569818	chip2_peak_6465
chr16	44300600	44300800	200	223.098	4.04955	0.000500833	0.599984	chip2_peak_7973
chr8	54076400	54076600	200	223.101	4.0496	0.000605793	0.619602	chip2_peak_9461
chrX	151999100	151999300	200	223.124	4.05001	0.000126196	0.410169	chip2_peak_2792
chr1	38491300	38491500	200	223.164	4.05074	0.000563731	0.610954	chip2_peak_8891
chr9	119819900	119820100	200	223.242	4.05215	0.000652332	0.627287	chip2_peak_10097
chr12	105873800	105874000	200	223.359	4.05428	0.000304533	0.536517	chip2_peak_5325
chr11	61359700	61359900	200	223.38	4.05466	0.000732595	0.638436	chip2_peak_11179
chr2	130394000	130394300	300	223.383	4.05472	0.000735889	0.638436	chip2_peak_11233
chrX	139585000	139585200	200	223.384	4.05473	0.000398165	0.572401	chip2_peak_6585
chr5	130296500	130296700	200	223.431	4.05558	6.46599e-05	0.326674	chip2_peak_1745
chr13	41223800	41224100	300	223.432	4.05561	0.000448749	0.587543	chip2_peak_7256
chr1	180821100	180821300	200	223.461	4.05613	0.00082512	0.648074	chip2_peak_12466
chr14	65477500	65477700	200	223.473	4.05634	0.000302947	0.535938	chip2_peak_5301
chr1	43088000	43088200	200	223.496	4.05677	0.000196698	0.476309	chip2_peak_3812
chr3	65062800	65063000	200	223.512	4.05706	0.000728741	0.638436	chip2_peak_11117
chr10	44026000	44026200	200	223.562	4.05796	0.000395049	0.571518	chip2_peak_6542
chr1	14076800	14077000	200	223.567	4.05805	0.000929677	0.654701	chip2_peak_13938
chr10	82221300	82221600	300	223.572	4.05815	0.000266357	0.519631	chip2_peak_4786
chr19	45439100	45439300	200	223.621	4.05904	0.000394015	0.571052	chip2_peak_6532
chr1	189011800	189012000	200	223.622	4.05905	0.000709321	0.633965	chip2_peak_10886
chr9	14652700	14653000	300	223.626	4.05912	0.000698074	0.632414	chip2_peak_10742
chr7	92094200	92094400	200	223.654	4.05963	7.44979e-05	0.340649	chip2_peak_1941
chr9	117535900	117536100	200	223.66	4.05975	0.000795448	0.645141	chip2_peak_12044
chr7	135053700	135053900	200	223.736	4.06113	0.000500447	0.599984	chip2_peak_7969
chr9	118415500	118415700	200	223.741	4.06122	9.97339e-05	0.378066	chip2_peak_2386
chr15	78970700	78970900	200	223.813	4.06252	0.000380518	0.56801	chip2_peak_6339
chr2	169085000	169085200	200	223.843	4.06306	0.000919891	0.65458	chip2_peak_13766
chr3	112096700	112096900	200	223.859	4.06335	0.00089514	0.652624	chip2_peak_13468
chr8	124114200	124114400	200	223.859	4.06335	0.00089514	0.652624	chip2_peak_13469
chr5	112044100	112044300	200	223.912	4.06431	0.000917461	0.65458	chip2_peak_13728
chr9	110072900	110073100	200	223.922	4.0645	0.00049652	0.598657	chip2_peak_7931
chr18	65301600	65301800	200	223.926	4.06457	0.000162622	0.443866	chip2_peak_3355
chr7	142985400	142985600	200	223.927	4.0646	0.00094405	0.656297	chip2_peak_14129
chr8	85562300	85562500	200	223.938	4.06479	0.000206063	0.483028	chip2_peak_3948
chr1	25185600	25185800	200	223.943	4.06488	0.000226423	0.493627	chip2_peak_4258
chr1	106546100	106546300	200	223.945	4.06491	0.000368451	0.564481	chip2_peak_6180
chrX	139868300	139868500	200	223.956	4.06512	0.000188072	0.467912	chip2_peak_3703
chr11	76485800	76486200	400	223.959	4.06518	0.000868093	0.651913	chip2_peak_13035
chr11	102373300	102373500	200	223.997	4.06587	0.000481994	0.593867	chip2_peak_7754
chr1	66446000	66446200	200	223.997	4.06587	0.000481994	0.593867	chip2_peak_7755
chr18	38797000	38797200	200	224.038	4.0666	0.000351782	0.558025	chip2_peak_5963
chr8	106560100	106560300	200	224.038	4.06661	7.21311e-05	0.337407	chip2_peak_1904
chr4	35837500	35837700	200	224.039	4.06663	0.000920231	0.65458	chip2_peak_13769
chr1	152381500	152381700	200	224.046	4.06674	0.000493921	0.598392	chip2_peak_7892
chr13	25727700	25728000	300	224.083	4.06742	0.000326919	0.549872	chip2_peak_5598
chr5	64294500	64294700	200	224.1	4.06772	0.00037867	0.567617	chip2_peak_6309
chr18	52018000	52018200	200	224.107	4.06786	0.000492626	0.598121	chip2_peak_7872
chr19	57739400	57739600	200	224.12	4.0681	0.000479471	0.593161	chip2_peak_7717
chr5	21933800	21934000	200	224.12	4.0681	0.000479471	0.593161	chip2_peak_7718
chr1	159896700	159896900	200	224.12	4.0681	0.000479471	0.593161	chip2_peak_7719
chr10	63701800	63702000	200	224.212	4.06976	0.000785443	0.643976	chip2_peak_11889
chr13	102584300	102584600	300	224.315	4.07163	0.000396235	0.571533	chip2_peak_6562
chr16	20151000	20151200	200	224.317	4.07166	0.000584966	0.616289	chip2_peak_9160
chr7	125813800	125814000	200	224.323	4.07177	0.000820363	0.64753	chip2_peak_12399
chr5	19370000	19370200	200	224.323	4.07177	0.000820363	0.64753	chip2_peak_12400
chr9	102500200	102500400	200	224.323	4.07177	0.000820363	0.64753	chip2_peak_12401
chr14	121327200	121327400	200	224.324	4.0718	0.00010693	0.385999	chip2_peak_2504
chr15	31185700	31185900	200	224.331	4.07192	0.000598133	0.617901	chip2_peak_9358
chr10	120646800	120647000	200	224.355	4.07235	2.46615e-05	0.211419	chip2_peak_995
chr15	77085500	77085700	200	224.39	4.073	0.000818199	0.647209	chip2_peak_12368
chr4	148658700	148658900	200	224.405	4.07327	0.000624541	0.623835	chip2_peak_9703
chr1	120250600	120250900	300	224.411	4.07338	0.000108693	0.386654	chip2_peak_2546
chr10	87750400	87750700	300	224.453	4.07414	0.00065832	0.628032	chip2_peak_10178
chr6	115076900	115077100	200	224.473	4.0745	0.00044086	0.586004	chip2_peak_7149
chr14	57859600	57859800	200	224.484	4.0747	0.000157337	0.441282	chip2_peak_3261
chr18	68224300	68224500	200	224.492	4.07484	7.21262e-05	0.337407	chip2_peak_1903
chr18	44616900	44617200	300	224.509	4.07515	0.000463861	0.590485	chip2_peak_7492
chr9	46236700	46236900	200	224.534	4.0756	0.000439706	0.585682	chip2_peak_7133
chr5	38415400	38415600	200	224.535	4.07562	0.000621263	0.623354	chip2_peak_9652
chr1	99748800	99749000	200	224.535	4.07562	0.000621263	0.623354	chip2_peak_9653
chr11	18895600	18895800	200	224.542	4.07576	0.000895577	0.65264	chip2_peak_13473
chr8	120238400	120238600	200	224.56	4.07607	0.000440941	0.586004	chip2_peak_7150
chr5	75152800	75153000	200	224.58	4.07644	0.00011652	0.399132	chip2_peak_2652
chr19	4459000	4459200	200	224.594	4.07669	0.000811744	0.646352	chip2_peak_12283
chr2	79414600	79414800	200	224.607	4.07693	0.000377256	0.567343	chip2_peak_6294
chr11	62493200	62493500	300	224.618	4.07712	8.18597e-05	0.348548	chip2_peak_2091
chr8	53988700	53988900	200	224.623	4.07723	0.000869189	0.651913	chip2_peak_13043
chr6	65156300	65156500	200	224.644	4.0776	0.00028708	0.530577	chip2_peak_5054
chr9	113695900	113696100	200	224.651	4.07773	0.000116541	0.399132	chip2_peak_2653
chr2	178287400	178287700	300	224.658	4.07786	0.000248617	0.507706	chip2_peak_4544
chr1	79683300	79683500	200	224.676	4.07819	0.000366251	0.563399	chip2_peak_6154
chr8	61278900	61279100	200	224.691	4.07845	0.000811895	0.646371	chip2_peak_12287
chr12	105649700	105649900	200	224.804	4.0805	0.000150815	0.437113	chip2_peak_3146
chr13	75766400	75766600	200	224.826	4.08091	5.33841e-05	0.299212	chip2_peak_1574
chr9	68304100	68304300	200	224.844	4.08124	0.000373328	0.566295	chip2_peak_6237
chr2	6097900	6098200	300	224.864	4.08159	0.000271996	0.52388	chip2_peak_4848
chr12	4989200	4989400	200	224.871	4.08173	0.000890738	0.651913	chip2_peak_13413
chr10	62872700	62872900	200	224.897	4.0822	0.000234541	0.500012	chip2_peak_4352
chr15	86305600	86305800	200	224.928	4.08275	0.000432308	0.583311	chip2_peak_7035
chr16	78474600	78474800	200	224.928	4.08275	0.000571904	0.61146	chip2_peak_9024
chr3	45056800	45057100	300	224.98	4.08371	0.000533675	0.605729	chip2_peak_8438
chr10	42410700	42410900	200	224.989	4.08387	0.000880381	0.651913	chip2_peak_13236
chr5	107689900	107690100	200	224.989	4.08387	0.000880381	0.651913	chip2_peak_13237
chr11	103239700	103240000	300	225.027	4.08456	0.000126804	0.410496	chip2_peak_2805
chr2	4553800	4554000	200	225.031	4.08463	0.000799746	0.645695	chip2_peak_12096
chr8	122740500	122740700	200	225.036	4.08472	0.000516508	0.601848	chip2_peak_8209
chr10	83062400	83062600	200	225.058	4.08513	0.000878058	0.651913	chip2_peak_13194
chr5	45779700	45779900	200	225.058	4.08513	0.000878058	0.651913	chip2_peak_13195
chr5	74121100	74121300	200	225.058	4.08513	0.000949878	0.656758	chip2_peak_14211
chr18	77095100	77095300	200	225.072	4.08538	0.000472865	0.592894	chip2_peak_7610
chr7	114222200	114222500	300	225.075	4.08542	0.000128739	0.412778	chip2_peak_2832
chr3	115723200	115723500	300	225.075	4.08544	0.000521003	0.602808	chip2_peak_8263
chr15	54071800	54072000	200	225.127	4.08638	0.000875741	0.651913	chip2_peak_13161
chr9	3218900	3219100	200	225.127	4.08638	0.000875741	0.651913	chip2_peak_13162
chr12	102893700	102893900	200	225.143	4.08667	0.000119276	0.402332	chip2_peak_2697
chr9	24431700	24431900	200	225.165	4.08706	0.000692925	0.632282	chip2_peak_10657
chr7	34923700	34923900	200	225.183	4.08738	0.000619047	0.622723	chip2_peak_9628
chr9	92148100	92148300	200	225.183	4.08738	0.000619047	0.622723	chip2_peak_9629
chr2	116367000	116367300	300	225.195	4.0876	0.000232385	0.498621	chip2_peak_4322
chr16	21304700	21304900	200	225.196	4.08763	0.000470392	0.592894	chip2_peak_7571
chr4	125493100	125493300	200	225.266	4.08889	0.000456638	0.589025	chip2_peak_7391
chr6	83769100	83769400	300	225.271	4.08899	0.000356537	0.56046	chip2_peak_6015
chr18	84961600	84961800	200	225.276	4.08907	0.000736382	0.638436	chip2_peak_11240
chr3	62801200	62801400	200	225.348	4.09038	0.000842603	0.649182	chip2_peak_12702
chr10	76349100	76349300	200	225.37	4.09079	0.00024573	0.505525	chip2_peak_4506
chr7	114505400	114505700	300	225.371	4.09081	6.01904e-05	0.316528	chip2_peak_1673
chr9	63980600	63980800	200	225.376	4.09089	0.000559986	0.610954	chip2_peak_8829
chr1	144104400	144104600	200	225.385	4.09106	0.00059774	0.617901	chip2_peak_9354
chr17	74965200	74965400	200	225.395	4.09124	0.000873757	0.651913	chip2_peak_13118
chr5	88400200	88400400	200	225.416	4.09161	0.000455527	0.588741	chip2_peak_7376
chr4	129025300	129025500	200	225.424	4.09177	0.00032194	0.546824	chip2_peak_5535
chr4	139088100	139088300	200	225.429	4.09185	0.000456869	0.589166	chip2_peak_7394
chr3	52954200	52954400	200	225.44	4.09205	0.000558516	0.610884	chip2_peak_8810
chr11	106020100	106020300	200	225.45	4.09223	0.00059617	0.617639	chip2_peak_9331
chr2	179805200	179805400	200	225.562	4.09427	0.000854279	0.650894	chip2_peak_12866
chr1	187272100	187272300	200	225.595	4.09486	0.000753866	0.64033	chip2_peak_11492
chr5	32227800	32228000	200	225.607	4.09508	0.000594716	0.617552	chip2_peak_9306
chr7	112766800	112767100	300	225.616	4.09525	0.000926092	0.65458	chip2_peak_13874
chr11	79690200	79690500	300	225.635	4.09559	1.73481e-05	0.180636	chip2_peak_810
chr4	48114700	48114900	200	225.643	4.09574	0.000591488	0.617171	chip2_peak_9253
chr8	56202500	56202700	200	225.644	4.09576	0.000274197	0.524803	chip2_peak_4880
chr19	52627200	52627400	200	225.652	4.0959	0.000788222	0.643989	chip2_peak_11941
chrX	73736100	73736400	300	225.68	4.09641	3.00948e-05	0.230977	chip2_peak_1119
chr4	96627200	96627400	200	225.682	4.09644	0.000781202	0.643976	chip2_peak_11819
chr5	103929300	103929500	200	225.682	4.09644	0.000837167	0.64881	chip2_peak_12637
chr16	41510900	41511300	400	225.685	4.0965	2.47898e-05	0.211852	chip2_peak_998
chr16	52152500	52152700	200	225.72	4.09713	0.000776947	0.643976	chip2_peak_11756
chr3	18374900	18375100	200	225.72	4.09713	0.000776947	0.643976	chip2_peak_11757
chr9	49617500	49617700	200	225.72	4.09713	0.000776947	0.643976	chip2_peak_11758
chr11	102835600	102835800	200	225.787	4.09836	0.000416603	0.578849	chip2_peak_6827
chr13	97782100	97782300	200	225.788	4.09836	0.000774901	0.643976	chip2_peak_11724
chr12	118791600	118791800	200	225.797	4.09854	5.04968e-05	0.292898	chip2_peak_1515
chr17	72049800	72050000	200	225.816	4.09888	0.000143339	0.429035	chip2_peak_3050
chr5	13515300	13515500	200	225.833	4.09919	0.00065627	0.628007	chip2_peak_10148
chr12	75589800	75590100	300	225.834	4.0992	0.000641198	0.625985	chip2_peak_9934
chr10	60087400	60087600	200	225.901	4.10042	0.0008232	0.647825	chip2_peak_12438
chr7	18880600	18880800	200	225.953	4.10137	0.000438349	0.585292	chip2_peak_7114
chr4	115775100	115775300	200	225.966	4.1016	9.23784e-05	0.365957	chip2_peak_2270
chr12	75734000	75734200	200	225.979	4.10183	0.000222873	0.491951	chip2_peak_4198
chr14	93034900	93035300	400	225.984	4.10193	0.000142923	0.42873	chip2_peak_3042
chr1	58305800	58306100	300	226.013	4.10246	0.000889577	0.651913	chip2_peak_13393
chr17	78972800	78973000	200	226.027	4.10271	9.82455e-05	0.375853	chip2_peak_2359
chr9	37052500	37052700	200	226.099	4.10402	0.000452726	0.58805	chip2_peak_7335
chr3	106974200	106974400	200	226.108	4.10417	0.000820992	0.647586	chip2_peak_12404
chr11	45303100	45303400	300	226.265	4.10702	0.000192459	0.472291	chip2_peak_3760
chr11	59178600	59178800	200	226.266	4.10704	0.000236605	0.501027	chip2_peak_4380
chr7	49698800	49699000	200	226.285	4.10739	0.000449182	0.587543	chip2_peak_7269
chr12	67735000	67735200	200	226.324	4.10811	0.000667136	0.628727	chip2_peak_10302
chr3	107083700	107083900	200	226.389	4.10928	0.000589498	0.61714	chip2_peak_9225
chr7	123117300	123117500	200	226.407	4.1096	0.000534589	0.605729	chip2_peak_8456
chr18	76285100	76285300	200	226.412	4.1097	0.000833761	0.648347	chip2_peak_12590
chr5	102846600	102846800	200	226.412	4.1097	0.000833761	0.648347	chip2_peak_12591
chr3	51844200	51844400	200	226.47	4.11075	0.00053319	0.605729	chip2_peak_8433
chr13	18226000	18226200	200	226.481	4.11095	0.000922702	0.65458	chip2_peak_13816
chr4	40963600	40963800	200	226.483	4.11098	0.000492725	0.598121	chip2_peak_7875
chr14	59214100	59214300	200	226.52	4.11165	0.000898001	0.653326	chip2_peak_13494
chr14	121617700	121617900	200	226.531	4.11185	0.000574525	0.612507	chip2_peak_9051
chr12	103157400	103157600	200	226.534	4.11191	0.000432644	0.583311	chip2_peak_7043
chr18	67650800	67651000	200	226.562	4.11243	0.000255934	0.512807	chip2_peak_4644
chr4	8521600	8521800	200	226.586	4.11285	0.000569222	0.611324	chip2_peak_8982
chr12	28710600	28710800	200	226.611	4.11331	0.00036492	0.562551	chip2_peak_6142
chr17	35643700	35643900	200	226.725	4.11538	0.000102577	0.380181	chip2_peak_2441
chr10	12857100	12857300	200	226.728	4.11543	0.000343612	0.556193	chip2_peak_5832
chr16	13639500	13639800	300	226.742	4.11568	0.000572928	0.611939	chip2_peak_9033
chr19	50483500	50483700	200	226.779	4.11636	0.000564756	0.610954	chip2_peak_8907
chr6	115862400	115862700	300	226.834	4.11736	7.4061e-05	0.340649	chip2_peak_1932
chr11	78380800	78381000	200	226.844	4.11754	0.000563275	0.610954	chip2_peak_8879
chr13	111435400	111435600	200	226.859	4.1178	0.000397848	0.572401	chip2_peak_6581
chr13	9533100	9533300	200	226.862	4.11787	0.000798036	0.645299	chip2_peak_12080
chr1	55700200	55700400	200	226.876	4.11812	0.00064073	0.625985	chip2_peak_9919
chr12	7751800	7752000	200	226.914	4.1188	0.000891305	0.651991	chip2_peak_13423
chr10	83917500	83917700	200	226.938	4.11924	0.000563381	0.610954	chip2_peak_8882
chr14	124480800	124481000	200	226.938	4.11924	0.000173528	0.455657	chip2_peak_3499
chr16	38449500	38449700	200	226.943	4.11934	0.000775501	0.643976	chip2_peak_11732
chr3	107669300	107669500	200	226.947	4.11941	0.000397923	0.572401	chip2_peak_6582
chr2	127439000	127439200	200	226.982	4.12004	0.000739769	0.638827	chip2_peak_11285
chr14	105483300	105483600	300	226.997	4.12032	3.79729e-05	0.257699	chip2_peak_1280
chr1	159547100	159547400	300	227.003	4.12042	0.000701225	0.632997	chip2_peak_10780
chr17	28156500	28156700	200	227.013	4.1206	0.000741861	0.638827	chip2_peak_11322
chr3	26849000	26849200	200	227.013	4.1206	0.000741861	0.638827	chip2_peak_11323
chr15	74349600	74349800	200	227.053	4.12133	0.000502872	0.599984	chip2_peak_8006
chr11	98813500	98813700	200	227.08	4.12183	0.00073991	0.638827	chip2_peak_11289
chr1	179352500	179353000	500	227.095	4.12209	4.46776e-05	0.277318	chip2_peak_1407
chr1	129500200	129500500	300	227.097	4.12213	0.000431843	0.583311	chip2_peak_7026
chr14	65042200	65042400	200	227.112	4.12239	0.000811778	0.646352	chip2_peak_12285
chr8	118858400	118858600	200	227.112	4.12241	0.000394864	0.57143	chip2_peak_6540
chr7	83069500	83069700	200	227.148	4.12306	0.000737964	0.638649	chip2_peak_11266
chr12	99320600	99320800	200	227.239	4.12472	0.000999594	0.66033	chip2_peak_14899
chr10	111360200	111360400	200	227.25	4.1249	0.000807508	0.646243	chip2_peak_12197
chr4	63422300	63422500	200	227.275	4.12536	0.000121481	0.404202	chip2_peak_2732
chr16	53062000	53062200	200	227.284	4.12552	0.000734087	0.638436	chip2_peak_11200
chr8	26393600	26393800	200	227.317	4.12613	0.00078375	0.643976	chip2_peak_11852
chr17	87567800	87568000	200	227.348	4.12669	0.000964803	0.657711	chip2_peak_14416
chr17	62764500	62764700	200	227.352	4.12675	0.000732157	0.638436	chip2_peak_11171
chr15	78511000	78511200	200	227.352	4.12675	0.000732157	0.638436	chip2_peak_11172
chrX	47220200	47220600	400	227.358	4.12686	0.000249697	0.508444	chip2_peak_4559
chr14	79160200	79160400	200	227.388	4.12741	0.000803262	0.646243	chip2_peak_12134
chr16	50551400	50551600	200	227.401	4.12764	0.000515235	0.601701	chip2_peak_8189
chr2	133509200	133509400	200	227.436	4.12829	0.000368569	0.564481	chip2_peak_6181
chr6	35036100	35036300	200	227.447	4.12849	0.000252442	0.510693	chip2_peak_4593
chr18	31881300	31881500	200	227.455	4.12862	0.00077963	0.643976	chip2_peak_11797
chr5	60179800	60180000	200	227.455	4.12863	0.000991698	0.659157	chip2_peak_14803
chr11	107683100	107683300	200	227.491	4.12929	0.000959718	0.657711	chip2_peak_14342
chr5	142122700	142123000	300	227.5	4.12945	0.00024849	0.507706	chip2_peak_4541
chr6	45273400	45273600	200	227.502	4.12948	0.000245108	0.505458	chip2_peak_4493
chr7	28636500	28636700	200	227.524	4.12988	0.000962441	0.657711	chip2_peak_14379
chr1	103857800	103858000	200	227.527	4.12994	0.000488892	0.596917	chip2_peak_7830
chr9	113812300	113812500	200	227.565	4.13061	0.000455522	0.588741	chip2_peak_7375
chr1	191357900	191358100	200	227.605	4.13134	0.000152745	0.437748	chip2_peak_3185
chr4	56177400	56177600	200	227.609	4.13142	5.51503e-05	0.302147	chip2_peak_1608
chr3	153582500	153582700	200	227.651	4.13219	0.000918605	0.65458	chip2_peak_13743
chr4	141903500	141903700	200	227.667	4.13248	0.000957369	0.65748	chip2_peak_14313
chr13	40640400	40640700	300	227.697	4.13302	0.000294549	0.532796	chip2_peak_5174
chr4	133857900	133858100	200	227.719	4.13343	1.7639e-05	0.181871	chip2_peak_818
chr7	119933300	119933700	400	227.737	4.13374	0.000459833	0.589885	chip2_peak_7431
chr14	101040400	101040600	200	227.738	4.13377	0.000902561	0.653838	chip2_peak_13553
chr3	121741500	121741700	200	227.741	4.13382	0.000842865	0.649182	chip2_peak_12706
chr17	26388100	26388400	300	227.773	4.13439	0.000877718	0.651913	chip2_peak_13189
chr8	17331600	17331900	300	227.776	4.13445	8.43356e-05	0.352626	chip2_peak_2136
chr10	79059500	79059700	200	227.79	4.13471	0.00055699	0.610648	chip2_peak_8787
chr5	14914900	14915200	300	227.803	4.13495	0.000346786	0.556528	chip2_peak_5886
chr2	59859500	59859700	200	227.842	4.13565	0.000465608	0.591537	chip2_peak_7508
chr3	3513600	3513800	200	227.95	4.13762	0.000895442	0.65264	chip2_peak_13472
chr4	125658500	125658700	200	227.99	4.13833	0.000593094	0.617171	chip2_peak_9285
chr17	34806500	34806700	200	227.999	4.1385	0.00028874	0.530927	chip2_peak_5085
chr14	16412000	16412200	200	228.002	4.13855	0.000307734	0.538329	chip2_peak_5363
chr6	37259000	37259200	200	228.002	4.13855	0.000307734	0.538329	chip2_peak_5364
chr5	28864400	28864600	200	228.045	4.13933	0.000536438	0.605729	chip2_peak_8493
chr6	146997100	146997400	300	228.084	4.14004	0.000233454	0.498924	chip2_peak_4339
chr9	40873900	40874100	200	228.098	4.1403	0.000785927	0.643976	chip2_peak_11904
chr18	80603000	80603200	200	228.107	4.14046	0.000372027	0.566295	chip2_peak_6219
chr6	60720100	60720300	200	228.121	4.14072	0.000589989	0.61714	chip2_peak_9233
chr15	43253500	43253800	300	228.209	4.14231	0.000128352	0.412336	chip2_peak_2828
chr18	20871300	20871600	300	228.223	4.14256	0.000126469	0.410169	chip2_peak_2799
chr1	81384800	81385000	200	228.243	4.14294	0.000704413	0.633199	chip2_peak_10828
chr9	48275000	48275200	200	228.27	4.14341	8.17557e-05	0.348548	chip2_peak_2088
chr2	164884500	164884700	200	228.296	4.14389	0.000283069	0.52899	chip2_peak_4999
chr5	16136700	16137000	300	228.395	4.14569	0.000294576	0.532796	chip2_peak_5176
chr10	105260800	105261100	300	228.397	4.14572	4.98463e-05	0.290485	chip2_peak_1508
chr1	20985100	20985300	200	228.483	4.14729	0.000212525	0.486247	chip2_peak_4040
chr11	35724200	35724400	200	228.527	4.14808	0.000748238	0.63967	chip2_peak_11420
chr1	135970200	135970400	200	228.534	4.14822	0.000768878	0.643615	chip2_peak_11648
chr8	41406100	41406300	200	228.542	4.14836	0.000593642	0.617261	chip2_peak_9295
chr10	79963100	79963300	200	228.565	4.14877	0.000212566	0.486247	chip2_peak_4041
chr17	73230500	73230700	200	228.595	4.14933	0.000746271	0.639361	chip2_peak_11390
chr14	22729700	22729900	200	228.595	4.14933	0.000862643	0.651913	chip2_peak_12950
chr6	92077400	92077800	400	228.596	4.14933	0.000297728	0.533621	chip2_peak_5235
chr12	73097500	73097700	200	228.662	4.15053	0.000677115	0.630166	chip2_peak_10444
chr7	67981700	67981900	200	228.664	4.15057	0.00074431	0.639086	chip2_peak_11358
chr7	96944100	96944300	200	228.664	4.15057	0.00074431	0.639086	chip2_peak_11359
chr1	184957600	184957800	200	228.664	4.15057	0.00074431	0.639086	chip2_peak_11360
chr3	144679000	144679200	200	228.7	4.15123	0.000549792	0.608948	chip2_peak_8683
chr9	21305500	21305700	200	228.733	4.15182	0.000742353	0.638827	chip2_peak_11332
chr10	20036700	20037000	300	228.744	4.15202	0.00017005	0.451572	chip2_peak_3459
chr11	29727400	29727600	200	228.749	4.15212	0.000916124	0.65458	chip2_peak_13706
chr9	71682100	71682300	200	228.783	4.15273	0.000918722	0.65458	chip2_peak_13747
chr13	89661900	89662100	200	228.798	4.153	0.00020143	0.479254	chip2_peak_3888
chr12	12232900	12233100	200	228.802	4.15307	0.000740402	0.638827	chip2_peak_11300
chr2	108752800	108753000	200	228.855	4.15404	0.000345332	0.556491	chip2_peak_5856
chr17	81185100	81185300	200	228.926	4.15533	0.000913886	0.65458	chip2_peak_13669
chr3	36531700	36531900	200	229.052	4.15761	0.000953232	0.657377	chip2_peak_14249
chr8	85675200	85675400	200	229.091	4.15832	0.000804836	0.646243	chip2_peak_12162
chr18	27610300	27610500	200	229.125	4.15894	0.00085707	0.651578	chip2_peak_12895
chr3	43275200	43275400	200	229.127	4.15898	0.000970759	0.657711	chip2_peak_14497
chr14	21776800	21777000	200	229.15	4.15939	0.000390293	0.569938	chip2_peak_6478
chr6	134373400	134373700	300	229.151	4.15942	0.000866485	0.651913	chip2_peak_13012
chr7	90924300	90924500	200	229.198	4.16026	0.000599576	0.618135	chip2_peak_9380
chr7	79194500	79194700	200	229.211	4.1605	0.000655585	0.628007	chip2_peak_10137
chr9	15723000	15723200	200	229.213	4.16053	0.000361063	0.561464	chip2_peak_6085
chr3	138569800	138570000	200	229.321	4.1625	0.000858646	0.651912	chip2_peak_12910
chr1	143959000	143959200	200	229.337	4.16279	0.00085032	0.649876	chip2_peak_12819
chr15	34135800	34136000	200	229.345	4.16293	0.0009631	0.657711	chip2_peak_14392
chr13	49173600	49173800	200	229.37	4.16338	0.000921248	0.65458	chip2_peak_13789
chr10	116550500	116550800	300	229.372	4.16342	4.6919e-06	0.0855004	chip2_peak_441
chr5	92665800	92666000	200	229.378	4.16353	0.000119917	0.402501	chip2_peak_2708
chr1	36892100	36892400	300	229.403	4.16398	0.000420317	0.580502	chip2_peak_6871
chr13	12176100	12176400	300	229.473	4.16526	0.000578042	0.614078	chip2_peak_9088
chr5	60129300	60129500	200	229.505	4.16584	0.000560519	0.610954	chip2_peak_8837
chr2	60204300	60204600	300	229.508	4.16588	0.000152465	0.437748	chip2_peak_3175
chr2	13387400	13387600	200	229.52	4.16612	0.000367376	0.563998	chip2_peak_6168
chr14	57807200	57807500	300	229.626	4.16804	0.000440673	0.585964	chip2_peak_7147
chr6	34900400	34900700	300	229.635	4.16819	0.000217577	0.490794	chip2_peak_4098
chr10	82244400	82244700	300	229.741	4.17013	0.000610456	0.621526	chip2_peak_9510
chr13	68553500	68553700	200	229.769	4.17063	0.000209808	0.485665	chip2_peak_3997
chr14	21666000	21666200	200	229.776	4.17076	0.00093872	0.655357	chip2_peak_14061
chr1	184070700	184070900	200	229.78	4.17083	9.3908e-05	0.367129	chip2_peak_2309
chr15	53566400	53566600	200	229.785	4.17092	0.000340204	0.55516	chip2_peak_5781
chr15	32613700	32613900	200	229.793	4.17107	0.000151126	0.437269	chip2_peak_3153
chr5	143498600	143498800	200	229.819	4.17154	0.000732142	0.638436	chip2_peak_11170
chr19	42681100	42681300	200	229.838	4.17189	0.000466173	0.591673	chip2_peak_7517
chr13	54099200	54099400	200	229.841	4.17194	0.000557167	0.610648	chip2_peak_8792
chr7	84193900	84194100	200	229.888	4.17279	0.000730219	0.638436	chip2_peak_11136
chr6	127611000	127611300	300	229.897	4.17295	0.000158108	0.441979	chip2_peak_3270
chr5	13619500	13619700	200	229.9	4.17301	0.000425671	0.581881	chip2_peak_6938
chr3	29354400	29354600	200	229.9	4.17301	0.000425671	0.581881	chip2_peak_6939
chr1	176137400	176137600	200	229.936	4.17365	0.000876869	0.651913	chip2_peak_13175
chr4	131691800	131692000	200	229.937	4.17368	0.000389292	0.569818	chip2_peak_6461
chr7	108404200	108404400	200	229.955	4.17401	0.000974173	0.65784	chip2_peak_14562
chr5	37194400	37194600	200	230.011	4.17502	0.000706903	0.633695	chip2_peak_10856
chr3	60607300	60607500	200	230.013	4.17506	0.000660427	0.628307	chip2_peak_10205
chr2	48426000	48426200	200	230.026	4.17529	0.000423452	0.58156	chip2_peak_6908
chr4	120231900	120232100	200	230.046	4.17566	0.000261756	0.516943	chip2_peak_4718
chr2	155268900	155269100	200	230.079	4.17625	0.000872259	0.651913	chip2_peak_13098
chr1	118910800	118911000	200	230.08	4.17627	0.000705047	0.633285	chip2_peak_10835
chr12	5418300	5418500	200	230.087	4.1764	0.00028843	0.530927	chip2_peak_5072
chr13	110827800	110828300	500	230.116	4.17693	1.98737e-05	0.191543	chip2_peak_877
chr4	96443300	96443500	200	230.15	4.17755	0.000869964	0.651913	chip2_peak_13057
chr7	117903200	117903400	200	230.182	4.17813	0.00042243	0.580855	chip2_peak_6900
chr2	18096900	18097100	200	230.256	4.17948	0.000870135	0.651913	chip2_peak_13063
chr2	20298800	20299000	200	230.256	4.17948	0.000870135	0.651913	chip2_peak_13064
chr3	155716700	155716900	200	230.275	4.17981	0.000957367	0.65748	chip2_peak_14312
chr11	98891800	98892000	200	230.328	4.18078	0.000867845	0.651913	chip2_peak_13027
chr13	5345700	5345900	200	230.348	4.18113	0.000954844	0.657417	chip2_peak_14271
chr9	77959200	77959400	200	230.348	4.18113	0.000954844	0.657417	chip2_peak_14272
chr8	29104200	29104400	200	230.402	4.18213	0.000926692	0.65458	chip2_peak_13882
chr9	44270100	44270300	200	230.403	4.18215	0.000736969	0.638436	chip2_peak_11254
chr6	58930800	58931000	200	230.411	4.18229	9.09058e-05	0.364661	chip2_peak_2242
chr6	56705900	56706100	200	230.449	4.18297	0.000552735	0.609623	chip2_peak_8726
chr6	81953800	81954000	200	230.449	4.18297	0.000552735	0.609623	chip2_peak_8727
chr3	110142200	110142500	300	230.451	4.183	5.38882e-05	0.299705	chip2_peak_1584
chr2	102940500	102940700	200	230.463	4.18323	0.000646353	0.626533	chip2_peak_10007
chr18	64100900	64101100	200	230.475	4.18344	0.000924252	0.65458	chip2_peak_13839
chr3	108681900	108682100	200	230.486	4.18365	0.000376083	0.566684	chip2_peak_6285
chr11	118125500	118125700	200	230.545	4.18471	0.000135723	0.42223	chip2_peak_2920
chr4	136076600	136076800	200	230.547	4.18476	0.000921818	0.65458	chip2_peak_13798
chr17	88012000	88012200	200	230.62	4.18607	0.000919391	0.65458	chip2_peak_13760
chr2	98294200	98294400	200	230.62	4.18607	0.000919391	0.65458	chip2_peak_13761
chr11	55252400	55252600	200	230.695	4.18744	0.00053235	0.605593	chip2_peak_8421
chr9	73328800	73329100	300	230.712	4.18775	0.000125411	0.4096	chip2_peak_2777
chr9	103597100	103597300	200	230.728	4.18804	0.000919572	0.65458	chip2_peak_13763
chr7	114027600	114027800	200	230.743	4.18831	0.000240179	0.502729	chip2_peak_4430
chr3	118849400	118849700	300	230.756	4.18855	0.00012507	0.409308	chip2_peak_2770
chr4	149053800	149054100	300	230.764	4.18868	8.50142e-05	0.354491	chip2_peak_2143
chr17	86282800	86283000	200	230.802	4.18939	0.00044628	0.587543	chip2_peak_7226
chr9	100817300	100817500	200	230.834	4.18997	0.000923139	0.65458	chip2_peak_13830
chr1	158147700	158147900	200	230.835	4.18997	0.000637132	0.625463	chip2_peak_9875
chr15	96907200	96907400	200	230.839	4.19005	0.000979685	0.658047	chip2_peak_14637
chr1	131042600	131042800	200	230.84	4.19007	0.000360386	0.561037	chip2_peak_6078
chr3	37465500	37465700	200	230.866	4.19055	0.000445115	0.587523	chip2_peak_7207
chr16	59923300	59923600	300	230.881	4.19081	0.000351566	0.557938	chip2_peak_5961
chr17	85319100	85319400	300	230.934	4.19177	0.000642625	0.626238	chip2_peak_9955
chr1	181463500	181463700	200	230.936	4.19182	0.000781745	0.643976	chip2_peak_11823
chr7	135061300	135061500	200	230.936	4.19182	0.000982426	0.658053	chip2_peak_14677
chr17	55137200	55137400	200	230.966	4.19235	0.000700876	0.632933	chip2_peak_10776
chr14	13966400	13966600	200	230.975	4.19252	0.000535615	0.605729	chip2_peak_8477
chr2	166378800	166379100	300	231.035	4.1936	0.000697455	0.632319	chip2_peak_10732
chr4	125017600	125017800	200	231.035	4.19362	0.00047514	0.592903	chip2_peak_7652
chr2	77114700	77114900	200	231.07	4.19424	0.000875557	0.651913	chip2_peak_13159
chr12	83941100	83941300	200	231.07	4.19424	0.000454892	0.588612	chip2_peak_7366
chr19	59902000	59902200	200	231.1	4.19479	0.000473899	0.592894	chip2_peak_7630
chr1	135797000	135797200	200	231.104	4.19486	0.000697204	0.632319	chip2_peak_10726
chr9	84792300	84792500	200	231.133	4.19538	0.000404425	0.573783	chip2_peak_6677
chr16	83131600	83131800	200	231.152	4.19573	0.000676731	0.63011	chip2_peak_10437
chr18	57760700	57760900	200	231.152	4.19573	0.000676731	0.63011	chip2_peak_10438
chr7	139767300	139767500	200	231.152	4.19573	0.00086142	0.651913	chip2_peak_12940
chr10	111119300	111119500	200	231.187	4.19637	0.000347281	0.556528	chip2_peak_5894
chr1	157635300	157635500	200	231.196	4.19652	0.000192575	0.472291	chip2_peak_3763
chr2	29785700	29786100	400	231.224	4.19705	0.000231319	0.498091	chip2_peak_4310
chr12	44310800	44311000	200	231.242	4.19736	0.000693552	0.632282	chip2_peak_10669
chr18	77798000	77798200	200	231.242	4.19736	0.000693552	0.632282	chip2_peak_10670
chr8	24415200	24415400	200	231.242	4.19736	0.000693552	0.632282	chip2_peak_10671
chr16	82957600	82957800	200	231.289	4.19822	0.000673187	0.629228	chip2_peak_10399
chr14	62231600	62231800	200	231.321	4.1988	0.000401271	0.573141	chip2_peak_6631
chr4	108800500	108800700	200	231.358	4.19947	0.000671423	0.62898	chip2_peak_10377
chr9	121015700	121015900	200	231.358	4.19947	0.000671423	0.62898	chip2_peak_10378
chr2	51009700	51009900	200	231.404	4.2003	0.000264743	0.51929	chip2_peak_4754
chr1	7133000	7133200	200	231.408	4.20038	0.00083055	0.648173	chip2_peak_12546
chr3	65431300	65431500	200	231.479	4.20166	0.000510738	0.600566	chip2_peak_8132
chr6	56039100	56039300	200	231.479	4.20167	0.000828367	0.648074	chip2_peak_12514
chr7	72464900	72465100	200	231.495	4.20197	0.000886607	0.651913	chip2_peak_13347
chr4	24492600	24492800	200	231.515	4.20233	0.000830715	0.648173	chip2_peak_12550
chr5	139969900	139970100	200	231.536	4.2027	0.000400293	0.572901	chip2_peak_6615
chr18	54867300	54867500	200	231.551	4.20297	0.00082619	0.648074	chip2_peak_12477
chr7	46406400	46406800	400	231.578	4.20346	0.000155712	0.440023	chip2_peak_3233
chr18	68042500	68042700	200	231.583	4.20356	5.63597e-05	0.305094	chip2_peak_1628
chr13	119329800	119330000	200	231.604	4.20394	0.000945142	0.656626	chip2_peak_14138
chr5	80954900	80955200	300	231.719	4.20602	0.000756688	0.641155	chip2_peak_11523
chr5	67678000	67678200	200	231.722	4.20608	0.000324292	0.548562	chip2_peak_5562
chrX	106635000	106635200	200	231.725	4.20614	0.000615566	0.622234	chip2_peak_9578
chr17	36893100	36893300	200	231.742	4.20645	0.000525078	0.604058	chip2_peak_8314
chr17	72256200	72256500	300	231.744	4.20648	0.000168079	0.450142	chip2_peak_3420
chr10	67702600	67702800	200	231.77	4.20696	0.000494792	0.598413	chip2_peak_7905
chr14	35993300	35993500	200	231.774	4.20701	0.000993229	0.659169	chip2_peak_14822
chr14	75469900	75470100	200	231.775	4.20705	0.000906747	0.65458	chip2_peak_13581
chr3	146350000	146350200	200	231.785	4.20723	0.000968608	0.657711	chip2_peak_14472
chr1	20937200	20937400	200	231.801	4.20752	0.000822018	0.647586	chip2_peak_12425
chr5	31703800	31704000	200	231.808	4.20765	0.000523706	0.603429	chip2_peak_8301
chr6	5108900	5109100	200	231.827	4.20799	0.000615688	0.622234	chip2_peak_9580
chr19	10791100	10791300	200	231.851	4.20842	0.000508379	0.600207	chip2_peak_8096
chr10	84901600	84901800	200	231.86	4.20858	0.000991167	0.659038	chip2_peak_14797
chr9	28780900	28781100	200	231.865	4.20868	0.000539607	0.60642	chip2_peak_8550
chr4	49086300	49086500	200	231.884	4.20903	0.000671162	0.62898	chip2_peak_10371
chr16	85988500	85988700	200	231.895	4.20922	0.000877718	0.651913	chip2_peak_13190
chr11	61256400	61256600	200	231.895	4.20922	0.000391827	0.570156	chip2_peak_6503
chr6	120989200	120989400	200	231.924	4.20974	9.24464e-05	0.365957	chip2_peak_2276
chr4	116563500	116563800	300	231.96	4.21041	6.30751e-05	0.323262	chip2_peak_1718
chr2	117450400	117450600	200	231.965	4.21049	0.00059736	0.617901	chip2_peak_9347
chr12	17101300	17101500	200	231.967	4.21053	0.00087541	0.651913	chip2_peak_13153
chr6	6415400	6415600	200	231.967	4.21053	0.00087541	0.651913	chip2_peak_13154
chr4	131518600	131518800	200	231.967	4.21053	0.00087541	0.651913	chip2_peak_13155
chr8	16243100	16243300	200	231.967	4.21053	0.00087541	0.651913	chip2_peak_13156
chr8	48137900	48138200	300	231.968	4.21054	0.000838155	0.648817	chip2_peak_12654
chr6	46990600	46990800	200	231.97	4.21057	0.000839946	0.648968	chip2_peak_12679
chr8	57755300	57755500	200	232.004	4.2112	0.000877894	0.651913	chip2_peak_13193
chr5	106615300	106615500	200	232.012	4.21135	0.000272491	0.524018	chip2_peak_4858
chr13	30138500	30138700	200	232.04	4.21185	0.000873109	0.651913	chip2_peak_13110
chr1	93243000	93243300	300	232.053	4.21209	3.94319e-05	0.262373	chip2_peak_1305
chr4	142823000	142823200	200	232.112	4.21316	0.000870813	0.651913	chip2_peak_13078
chr1	191282000	191282200	200	232.212	4.21497	0.000838324	0.648839	chip2_peak_12657
chr14	59730000	59730200	200	232.25	4.21567	0.000862718	0.651913	chip2_peak_12952
chr11	6273000	6273200	200	232.293	4.21645	0.000213347	0.486873	chip2_peak_4053
chr8	11291300	11291500	200	232.3	4.21657	0.000682038	0.630901	chip2_peak_10508
chr3	105965900	105966100	200	232.365	4.21775	0.000450235	0.587543	chip2_peak_7293
chr5	80884700	80884900	200	232.388	4.21818	0.000663976	0.628601	chip2_peak_10258
chr16	7060800	7061000	200	232.391	4.21822	0.00046258	0.59009	chip2_peak_7478
chr15	74368800	74369000	200	232.43	4.21893	0.00081374	0.646571	chip2_peak_12311
chr4	150342000	150342200	200	232.43	4.21893	0.000815724	0.646726	chip2_peak_12336
chr7	81287500	81287700	200	232.455	4.21939	0.000461373	0.590049	chip2_peak_7454
chr16	48302700	48302900	200	232.457	4.21943	0.000662236	0.628307	chip2_peak_10229
chr6	127876000	127876200	200	232.499	4.22018	0.000642803	0.626273	chip2_peak_9958
chr5	67843900	67844100	200	232.506	4.2203	0.000225029	0.492927	chip2_peak_4229
chr17	66549200	66549400	200	232.527	4.22068	0.000660502	0.628307	chip2_peak_10206
chr3	103608300	103608500	200	232.558	4.22125	0.000375368	0.566396	chip2_peak_6275
chr7	129801100	129801400	300	232.572	4.22151	0.000493221	0.598162	chip2_peak_7884
chr15	66185700	66186000	300	232.621	4.2224	0.000613029	0.621962	chip2_peak_9539
chr13	18744400	18744600	200	232.623	4.22244	0.000445557	0.587543	chip2_peak_7214
chr10	24301600	24301800	200	232.685	4.22356	0.000232682	0.498621	chip2_peak_4328
chr9	91914200	91914400	200	232.705	4.22392	0.000637768	0.62564	chip2_peak_9883
chr6	115805400	115805600	200	232.712	4.22405	0.000611092	0.621802	chip2_peak_9514
chr14	64695200	64695500	300	232.769	4.22509	0.000865561	0.651913	chip2_peak_12997
chr15	26748600	26748800	200	232.774	4.22517	0.000636098	0.625405	chip2_peak_9861
chr15	54871200	54871400	200	232.784	4.22535	0.000704648	0.633235	chip2_peak_10831
chr6	84393600	84393800	200	232.844	4.22645	0.000488664	0.596736	chip2_peak_7826
chr1	70917800	70918100	300	232.873	4.22696	8.68098e-06	0.124164	chip2_peak_586
chr9	116540000	116540200	200	232.876	4.22703	0.000812885	0.646411	chip2_peak_12300
chr2	76884000	76884200	200	232.885	4.22718	0.000330522	0.551824	chip2_peak_5644
chr4	155901000	155901200	200	232.904	4.22753	0.000501452	0.599984	chip2_peak_7981
chr7	123046500	123046700	200	232.912	4.22767	0.000870247	0.651913	chip2_peak_13066
chr6	142422300	142422500	200	232.921	4.22785	2.36031e-05	0.207433	chip2_peak_971
chr2	28690700	28690900	200	232.961	4.22857	0.000482714	0.594394	chip2_peak_7761
chr10	44428700	44428900	200	232.984	4.22899	0.00086796	0.651913	chip2_peak_13031
chr9	27326800	27327300	500	233.002	4.22931	0.000146974	0.433253	chip2_peak_3096
chr14	10761600	10761800	200	233.035	4.22991	0.000337792	0.553803	chip2_peak_5752
chr10	112742700	112742900	200	233.057	4.23032	0.00086568	0.651913	chip2_peak_13002
chr2	44715700	44715900	200	233.057	4.23032	0.00086568	0.651913	chip2_peak_13003
chr2	145306700	145307000	300	233.075	4.23063	0.000237491	0.50133	chip2_peak_4388
chr8	46049400	46049700	300	233.082	4.23077	0.00014551	0.430922	chip2_peak_3081
chr5	31131000	31131200	200	233.097	4.23103	0.000336914	0.553604	chip2_peak_5735
chr3	102112400	102112700	300	233.106	4.2312	0.000342173	0.556009	chip2_peak_5800
chr13	100711800	100712000	200	233.17	4.23236	0.000837985	0.648817	chip2_peak_12651
chr2	28076400	28076600	200	233.204	4.23298	0.000612778	0.621921	chip2_peak_9535
chr3	83107800	83108000	200	233.243	4.23368	0.000835785	0.648364	chip2_peak_12625
chr13	76003300	76003600	300	233.282	4.23439	0.000396172	0.571518	chip2_peak_6558
chr8	68091500	68091700	200	233.294	4.23461	0.000581812	0.614629	chip2_peak_9138
chr12	88799800	88800000	200	233.353	4.23568	0.000835955	0.648365	chip2_peak_12627
chr6	70077200	70077500	300	233.355	4.23572	0.000332732	0.551899	chip2_peak_5679
chr16	29820500	29820700	200	233.365	4.2359	0.000169387	0.450948	chip2_peak_3449
chr5	53771100	53771300	200	233.39	4.23635	0.00094765	0.656668	chip2_peak_14174
chr3	125093700	125094000	300	233.421	4.23691	0.000634173	0.625263	chip2_peak_9833
chr11	64977600	64977800	200	233.435	4.23718	0.000646517	0.626538	chip2_peak_10008
chr11	62819400	62819600	200	233.46	4.23762	0.000829219	0.648139	chip2_peak_12531
chr6	20039100	20039300	200	233.46	4.23762	0.000829219	0.648139	chip2_peak_12532
chr9	89276400	89276600	200	233.477	4.23793	0.000168514	0.450142	chip2_peak_3435
chr2	135018900	135019100	200	233.501	4.23838	0.000430016	0.583172	chip2_peak_6998
chr1	134435700	134435900	200	233.503	4.23841	0.000881606	0.651913	chip2_peak_13262
chr5	111219200	111219400	200	233.504	4.23842	0.0002482	0.507706	chip2_peak_4537
chr16	86586100	86586400	300	233.511	4.23854	5.13566e-05	0.294625	chip2_peak_1533
chr9	55183000	55183200	200	233.532	4.23894	0.000827042	0.648074	chip2_peak_12492
chr5	5269400	5269600	200	233.588	4.23995	0.000201227	0.479105	chip2_peak_3884
chr4	47803800	47804000	200	233.597	4.24011	0.00044065	0.585964	chip2_peak_7146
chr8	26960800	26961000	200	233.604	4.24024	0.000799781	0.645695	chip2_peak_12097
chr2	92952400	92952600	200	233.613	4.2404	0.000940193	0.655535	chip2_peak_14084
chr13	9768600	9768800	200	233.673	4.24149	0.000632371	0.624864	chip2_peak_9807
chr9	83109300	83109500	200	233.673	4.24149	0.000632371	0.624864	chip2_peak_9808
chr6	83307000	83307200	200	233.713	4.24222	0.000697278	0.632319	chip2_peak_10729
chr18	76356500	76356700	200	233.742	4.24275	0.000630717	0.624864	chip2_peak_9785
chr18	17983200	17983400	200	233.742	4.24275	0.00055612	0.610384	chip2_peak_8776
chr3	103794000	103794200	200	233.764	4.24314	0.000727251	0.63839	chip2_peak_11089
chr6	32871500	32871700	200	233.79	4.24361	8.73779e-05	0.357971	chip2_peak_2189
chr19	5375400	5375800	400	233.806	4.2439	1.03428e-05	0.137386	chip2_peak_632
chr8	46368100	46368300	200	233.927	4.2461	0.000618585	0.622723	chip2_peak_9617
chr9	33183700	33184000	300	233.932	4.24619	0.000124444	0.40913	chip2_peak_2760
chr13	26047400	26047600	200	233.949	4.24651	0.00062578	0.623841	chip2_peak_9720
chr1	89844200	89844400	200	233.949	4.24651	0.00062578	0.623841	chip2_peak_9721
chr14	48457800	48458100	300	233.991	4.24726	0.000650725	0.62698	chip2_peak_10077
chr17	10307800	10308000	200	233.991	4.24726	0.000123416	0.407426	chip2_peak_2749
chr5	38497300	38497500	200	234	4.24743	0.000324355	0.548562	chip2_peak_5563
chr18	73635200	73635500	300	234.051	4.24835	4.55865e-05	0.279241	chip2_peak_1425
chr12	54438000	54438300	300	234.071	4.24873	0.000154156	0.438551	chip2_peak_3207
chr6	56721900	56722100	200	234.215	4.25132	0.000312465	0.540282	chip2_peak_5427
chr17	32519900	32520100	200	234.228	4.25157	5.07547e-05	0.293644	chip2_peak_1520
chr9	79286700	79286900	200	234.276	4.25244	0.000311654	0.540282	chip2_peak_5412
chr8	22901000	22901200	200	234.276	4.25244	0.000311654	0.540282	chip2_peak_5413
chr8	77499600	77499800	200	234.286	4.25261	0.000772078	0.643976	chip2_peak_11689
chr5	149954500	149954700	200	234.352	4.25382	0.000745305	0.639178	chip2_peak_11377
chr16	16422500	16422800	300	234.372	4.25417	0.000300027	0.534741	chip2_peak_5263
chr6	127921200	127921400	200	234.384	4.2544	0.000555511	0.610384	chip2_peak_8762
chr15	40579600	40579800	200	234.412	4.25491	0.000824355	0.647942	chip2_peak_12459
chr4	11375200	11375400	200	234.426	4.25516	0.000590756	0.617171	chip2_peak_9245
chr12	99689400	99689600	200	234.458	4.25575	0.00016102	0.442487	chip2_peak_3332
chr3	156283600	156283800	200	234.485	4.25623	0.000822192	0.647586	chip2_peak_12428
chr8	77569300	77569500	200	234.485	4.25623	0.000822192	0.647586	chip2_peak_12429
chr8	90821100	90821300	200	234.485	4.25623	0.000822192	0.647586	chip2_peak_12430
chr16	49909500	49909700	200	234.552	4.25745	0.000382808	0.568576	chip2_peak_6373
chr16	3836000	3836200	200	234.558	4.25755	0.000820035	0.64742	chip2_peak_12396
chr7	92475600	92475800	200	234.564	4.25767	0.000847301	0.649849	chip2_peak_12767
chr1	157343700	157343900	200	234.569	4.25775	7.81105e-05	0.344608	chip2_peak_2021
chr15	98061300	98061500	200	234.588	4.2581	0.000551172	0.609269	chip2_peak_8702
chr12	34906100	34906300	200	234.59	4.25814	0.000795909	0.64519	chip2_peak_12052
chr10	18451400	18451600	200	234.663	4.25945	0.000793822	0.645125	chip2_peak_12019
chr17	46397100	46397300	200	234.692	4.25999	0.000551285	0.609269	chip2_peak_8704
chr1	37271600	37271900	300	234.711	4.26034	0.000204665	0.48183	chip2_peak_3929
chr10	114228200	114228400	200	234.735	4.26077	0.000791741	0.644502	chip2_peak_11994
chr1	95324600	95324800	200	234.735	4.26077	0.000791741	0.644502	chip2_peak_11995
chr6	32890800	32891000	200	234.767	4.26135	0.000218173	0.490794	chip2_peak_4112
chr17	71027100	71027300	200	234.771	4.26142	0.000902368	0.653817	chip2_peak_13550
chr18	77055900	77056100	200	234.776	4.26152	0.000813599	0.646522	chip2_peak_12308
chr8	121058600	121058800	200	234.79	4.26177	0.000636243	0.625405	chip2_peak_9863
chr1	131423800	131424000	200	234.822	4.26235	0.000102869	0.380202	chip2_peak_2449
chr18	77540000	77540300	300	234.831	4.26251	0.000121491	0.404202	chip2_peak_2733
chr4	130034300	130034500	200	234.831	4.26252	0.00040753	0.575064	chip2_peak_6717
chr13	103464200	103464400	200	234.845	4.26277	0.000899998	0.653544	chip2_peak_13516
chr11	75104600	75104800	200	234.845	4.26277	0.000899998	0.653544	chip2_peak_13517
chr12	89124800	89125000	200	234.846	4.26279	0.000791904	0.644502	chip2_peak_11997
chr1	74701600	74701800	200	234.857	4.26298	0.000121762	0.404612	chip2_peak_2735
chr7	40459000	40459200	200	234.885	4.26349	0.000586916	0.616533	chip2_peak_9191
chr7	127102800	127103000	200	234.896	4.26369	0.00040647	0.574901	chip2_peak_6696
chr12	31532400	31532600	200	234.954	4.26474	0.000607685	0.620411	chip2_peak_9475
chr15	37980600	37980900	300	234.981	4.26524	0.000278806	0.525819	chip2_peak_4953
chr16	11078000	11078200	200	234.997	4.26553	0.000461578	0.590049	chip2_peak_7458
chr16	90182100	90182300	200	235.034	4.2662	0.00089782	0.65332	chip2_peak_13491
chr2	131672800	131673000	200	235.034	4.2662	0.00089782	0.65332	chip2_peak_13492
chr1	39618600	39618800	200	235.034	4.2662	0.00089782	0.65332	chip2_peak_13493
chr17	90171300	90171500	200	235.064	4.26674	0.000785693	0.643976	chip2_peak_11892
chr4	140891500	140891700	200	235.064	4.26674	0.000785693	0.643976	chip2_peak_11893
chr1	80558200	80558600	400	235.087	4.26715	0.000559623	0.610954	chip2_peak_8825
chr15	7885300	7885500	200	235.089	4.26719	0.000933178	0.654834	chip2_peak_13991
chr11	61123500	61123700	200	235.096	4.26732	0.000599166	0.618135	chip2_peak_9375
chr9	6263400	6263700	300	235.158	4.26845	0.000238262	0.501574	chip2_peak_4403
chr13	55762800	55763000	200	235.165	4.26857	0.000597601	0.617901	chip2_peak_9349
chr2	149087800	149088000	200	235.165	4.26857	0.000597601	0.617901	chip2_peak_9350
chr14	47324100	47324400	300	235.176	4.26878	0.000360958	0.561464	chip2_peak_6083
chr4	95629900	95630200	300	235.207	4.26933	3.75649e-05	0.256404	chip2_peak_1272
chr4	149596100	149596400	300	235.247	4.27006	0.000203945	0.481124	chip2_peak_3923
chr8	107590800	107591000	200	235.261	4.27032	0.000800952	0.645897	chip2_peak_12114
chr5	150585400	150585600	200	235.276	4.27058	0.000184796	0.465107	chip2_peak_3657
chr11	49267800	49268000	200	235.336	4.27168	0.000306649	0.537402	chip2_peak_5354
chr2	31159600	31159800	200	235.377	4.27243	0.00043334	0.583845	chip2_peak_7048
chr7	78082000	78082300	300	235.387	4.2726	0.000691726	0.632282	chip2_peak_10634
chr7	39536300	39536500	200	235.393	4.27272	0.00029856	0.534126	chip2_peak_5244
chr18	84485100	84485300	200	235.513	4.27489	0.000996835	0.659819	chip2_peak_14869
chr16	58511800	58512000	200	235.547	4.27551	0.000747286	0.639428	chip2_peak_11409
chr14	120158800	120159000	200	235.578	4.27608	0.000530536	0.605076	chip2_peak_8393
chr12	4835500	4835700	200	235.595	4.27638	0.000174072	0.456356	chip2_peak_3504
chr18	56653900	56654100	200	235.644	4.27727	0.000225971	0.493419	chip2_peak_4249
chr12	100921100	100921400	300	235.669	4.27772	0.00013971	0.425478	chip2_peak_2991
chr16	31341900	31342100	200	235.782	4.27977	0.000526397	0.604209	chip2_peak_8333
chr15	4063100	4063300	200	235.8	4.2801	0.000285467	0.529829	chip2_peak_5029
chr14	74959800	74960100	300	235.805	4.28018	0.000274205	0.524803	chip2_peak_4881
chr9	119135800	119136100	300	235.805	4.28019	0.000109038	0.387241	chip2_peak_2551
chr11	88897500	88897900	400	235.826	4.28057	3.03515e-07	0.0164787	chip2_peak_141
chr12	54567900	54568100	200	235.88	4.28156	0.000402018	0.573254	chip2_peak_6643
chr14	73322900	73323100	200	235.912	4.28214	0.000780949	0.643976	chip2_peak_11816
chr7	114114100	114114300	200	235.933	4.28252	0.000580462	0.614375	chip2_peak_9122
chr9	70348000	70348200	200	235.938	4.2826	0.000757988	0.641657	chip2_peak_11535
chr13	17412400	17412700	300	235.95	4.28282	5.4583e-06	0.0948991	chip2_peak_467
chr4	101673300	101673500	200	236.029	4.28425	0.000862972	0.651913	chip2_peak_12957
chr11	18573000	18573200	200	236.058	4.28479	0.000776863	0.643976	chip2_peak_11754
chr1	158089100	158089300	200	236.083	4.28523	0.000754024	0.64033	chip2_peak_11495
chr11	84815400	84815600	200	236.123	4.28596	0.000756161	0.641155	chip2_peak_11513
chr18	75841600	75841800	200	236.204	4.28744	0.000396821	0.572112	chip2_peak_6565
chr6	139616300	139616500	200	236.227	4.28784	0.000857056	0.651578	chip2_peak_12894
chr4	9581500	9581700	200	236.249	4.28826	0.000992704	0.659169	chip2_peak_14815
chr14	40554600	40554800	200	236.268	4.28859	0.000752207	0.640016	chip2_peak_11470
chr2	92809500	92809700	200	236.291	4.28902	0.000286265	0.530369	chip2_peak_5041
chr11	93986000	93986400	400	236.373	4.2905	0.000327896	0.55008	chip2_peak_5614
chr18	70436600	70436800	200	236.375	4.29054	0.000852568	0.650317	chip2_peak_12851
chr8	87982700	87983000	300	236.421	4.29138	0.000348116	0.556528	chip2_peak_5913
chr14	103726500	103726700	200	236.541	4.29355	7.79367e-05	0.344468	chip2_peak_2018
chr5	54888300	54888500	200	236.565	4.29399	0.000850511	0.649876	chip2_peak_12825
chr3	54045700	54045900	200	236.565	4.29399	0.000850511	0.649876	chip2_peak_12826
chr12	49034800	49035100	300	236.59	4.29444	6.25974e-05	0.322835	chip2_peak_1709
chr10	67090600	67090800	200	236.595	4.29454	0.000166338	0.449063	chip2_peak_3395
chr2	6603700	6603900	200	236.61	4.2948	0.000290684	0.531461	chip2_peak_5116
chr9	87993400	87993600	200	236.623	4.29505	0.000959262	0.657711	chip2_peak_14335
chr8	37948600	37948800	200	236.768	4.29768	0.000991367	0.659073	chip2_peak_14799
chr5	34395800	34396000	200	236.778	4.29785	0.000134289	0.419972	chip2_peak_2901
chr2	135168800	135169000	200	236.796	4.29817	0.000756504	0.641155	chip2_peak_11518
chr10	91001500	91001800	300	236.82	4.29862	6.64708e-05	0.330466	chip2_peak_1777
chr4	84540500	84540700	200	236.833	4.29885	0.000133944	0.419744	chip2_peak_2896
chr12	38393100	38393500	400	236.835	4.29888	9.16396e-05	0.365775	chip2_peak_2256
chr4	152205400	152205600	200	236.84	4.29898	0.000505393	0.600109	chip2_peak_8046
chr3	143078100	143078300	200	236.845	4.29907	0.000988763	0.658794	chip2_peak_14765
chr9	27432100	27432300	200	236.845	4.29907	0.000988763	0.658794	chip2_peak_14766
chr7	97593300	97593500	200	236.893	4.29995	2.97138e-05	0.230109	chip2_peak_1109
chr9	29834900	29835100	200	236.922	4.30046	0.000986166	0.658559	chip2_peak_14724
chr10	122807600	122807800	200	236.976	4.30144	0.000502764	0.599984	chip2_peak_8003
chr3	38360200	38360500	300	236.997	4.30183	0.000150618	0.437113	chip2_peak_3139
chr15	96150300	96150500	200	236.998	4.30185	0.000983577	0.65817	chip2_peak_14690
chr6	127567800	127568000	200	236.998	4.30185	0.000983577	0.65817	chip2_peak_14691
chr4	25656900	25657100	200	236.998	4.30185	0.000983577	0.65817	chip2_peak_14692
chr4	104753200	104753400	200	236.998	4.30185	0.000983577	0.65817	chip2_peak_14693
chr1	129299000	129299200	200	236.998	4.30185	0.000983577	0.65817	chip2_peak_14694
chr6	8817200	8817400	200	237.016	4.30217	0.000865544	0.651913	chip2_peak_12996
chr9	98579400	98579600	200	237.043	4.30267	0.000501455	0.599984	chip2_peak_7982
chr7	79449200	79449500	300	237.071	4.30317	0.000586147	0.616497	chip2_peak_9177
chr19	53279800	53280000	200	237.075	4.30324	0.000980994	0.658047	chip2_peak_14652
chr3	137490700	137490900	200	237.075	4.30324	0.000980994	0.658047	chip2_peak_14653
chr2	161810300	161810500	200	237.075	4.30324	0.000980994	0.658047	chip2_peak_14654
chr3	54005700	54005900	200	237.133	4.3043	0.000249769	0.508444	chip2_peak_4562
chr12	7752100	7752300	200	237.149	4.30459	0.000242514	0.504143	chip2_peak_4460
chr2	145591200	145591400	200	237.149	4.30459	0.000554376	0.610103	chip2_peak_8747
chr1	12373100	12373300	200	237.15	4.3046	0.00050156	0.599984	chip2_peak_7985
chr11	70220200	70220400	200	237.184	4.30523	0.000153637	0.438492	chip2_peak_3198
chr9	100645600	100645800	200	237.267	4.30673	0.000892984	0.65225	chip2_peak_13440
chr19	38925400	38925600	200	237.271	4.30681	0.000978626	0.658047	chip2_peak_14613
chr16	20234700	20235000	300	237.275	4.30688	0.000152511	0.437748	chip2_peak_3178
chr8	25429800	25430000	200	237.287	4.30709	0.000551489	0.609269	chip2_peak_8710
chr18	74716700	74716900	200	237.339	4.30804	7.48795e-05	0.340671	chip2_peak_1953
chr15	83776300	83776500	200	237.34	4.30806	0.000741832	0.638827	chip2_peak_11320
chr5	38542700	38543000	300	237.343	4.30811	8.80203e-05	0.359002	chip2_peak_2198
chr13	14675300	14675500	200	237.362	4.30845	0.000368009	0.564165	chip2_peak_6174
chr14	121794100	121794300	200	237.362	4.30845	0.000368009	0.564165	chip2_peak_6175
chr18	80373400	80373600	200	237.373	4.30865	0.000533947	0.605729	chip2_peak_8442
chr8	77104000	77104200	200	237.39	4.30896	0.000278457	0.525819	chip2_peak_4944
chr11	98279100	98279300	200	237.399	4.30913	0.000153146	0.437869	chip2_peak_3191
chr3	87355100	87355300	200	237.468	4.31037	0.000406709	0.574901	chip2_peak_6706
chr9	22812300	22812500	200	237.503	4.31101	0.000913925	0.65458	chip2_peak_13671
chr8	80701900	80702100	200	237.583	4.31247	0.000760465	0.64238	chip2_peak_11552
chr3	24982400	24982600	200	237.596	4.31269	0.000896873	0.653052	chip2_peak_13485
chr16	42103400	42103600	200	237.608	4.31291	0.000816222	0.646745	chip2_peak_12344
chr2	170348200	170348400	200	237.608	4.31291	0.000816222	0.646745	chip2_peak_12345
chr12	50365200	50365400	200	237.624	4.31322	0.000213278	0.486873	chip2_peak_4051
chr5	124904500	124904700	200	237.63	4.31332	8.1798e-05	0.348548	chip2_peak_2089
chr7	96417200	96417400	200	237.682	4.31427	0.000265425	0.519631	chip2_peak_4765
chr9	102190300	102190600	300	237.695	4.3145	0.00013534	0.421666	chip2_peak_2915
chr6	33020100	33020300	200	237.73	4.31514	0.000402501	0.573254	chip2_peak_6653
chr1	39849300	39849500	200	237.761	4.31569	0.000937885	0.655357	chip2_peak_14050
chr11	3504400	3504600	200	237.785	4.31613	0.000346907	0.556528	chip2_peak_5888
chr4	149467400	149467600	200	237.806	4.31652	0.00065667	0.628032	chip2_peak_10153
chr5	74858500	74858800	300	237.831	4.31696	0.000773484	0.643976	chip2_peak_11706
chr6	140666700	140666900	200	237.847	4.31725	0.000248715	0.507706	chip2_peak_4548
chr4	114644700	114644900	200	237.861	4.31752	0.000400413	0.572901	chip2_peak_6618
chr11	105279300	105279500	200	237.88	4.31785	0.000156919	0.441108	chip2_peak_3253
chr8	107895300	107895500	200	237.891	4.31806	0.00015238	0.437748	chip2_peak_3174
chr10	43943800	43944000	200	237.909	4.31839	0.000438724	0.585428	chip2_peak_7121
chr11	104310000	104310200	200	237.927	4.31871	0.000399374	0.572668	chip2_peak_6605
chr8	30993500	30993700	200	237.931	4.31879	0.000305249	0.536799	chip2_peak_5333
chr1	173963100	173963300	200	237.947	4.31908	0.000810001	0.646243	chip2_peak_12251
chr2	145518300	145518500	200	237.979	4.31965	0.000805594	0.646243	chip2_peak_12173
chr11	61260500	61260700	200	238.011	4.32023	0.000107145	0.386017	chip2_peak_2507
chr3	117988700	117988900	200	238.041	4.32078	0.00068678	0.631542	chip2_peak_10574
chr1	105745200	105745500	300	238.057	4.32106	0.000576513	0.613453	chip2_peak_9071
chr10	35267700	35267900	200	238.091	4.32169	0.000878183	0.651913	chip2_peak_13196
chr6	112470700	112470900	200	238.17	4.32311	0.000480219	0.593193	chip2_peak_7734
chr14	16999800	17000100	300	238.178	4.32327	0.000133546	0.419337	chip2_peak_2890
chr11	3505200	3505400	200	238.236	4.32432	0.000697538	0.632319	chip2_peak_10734
chr6	8077700	8077900	200	238.237	4.32434	0.00047897	0.593161	chip2_peak_7710
chr12	116635300	116635500	200	238.297	4.32543	0.000294955	0.532796	chip2_peak_5186
chr4	116331400	116331600	200	238.305	4.32557	0.000477724	0.592997	chip2_peak_7693
chr10	19870200	19870400	200	238.309	4.32564	0.000695716	0.632319	chip2_peak_10703
chr4	89395600	89395800	200	238.346	4.32632	0.000939114	0.655357	chip2_peak_14066
chr9	89436900	89437100	200	238.346	4.32632	0.000939114	0.655357	chip2_peak_14067
chr7	29075900	29076100	200	238.351	4.3264	0.000637578	0.625544	chip2_peak_9881
chr15	84955700	84955900	200	238.365	4.32666	0.000280281	0.526737	chip2_peak_4971
chr9	103422800	103423000	200	238.368	4.32672	0.000244304	0.505427	chip2_peak_4480
chr12	29411900	29412100	200	238.373	4.32681	0.000476482	0.592918	chip2_peak_7675
chr9	119037500	119037700	200	238.377	4.32687	0.000833963	0.648347	chip2_peak_12596
chr13	10174000	10174200	200	238.423	4.32771	0.000936651	0.655321	chip2_peak_14033
chr9	42211600	42211900	300	238.451	4.32821	0.000483081	0.594394	chip2_peak_7766
chr4	137555500	137555700	200	238.459	4.32836	0.000261309	0.516359	chip2_peak_4715
chr9	88349800	88350000	200	238.498	4.32907	0.000518516	0.602542	chip2_peak_8225
chr1	144493200	144493400	200	238.56	4.3302	0.00025213	0.510656	chip2_peak_4589
chr6	147032600	147032800	200	238.572	4.33041	0.000525368	0.60409	chip2_peak_8320
chr4	36530400	36530600	200	238.576	4.33049	0.000931746	0.654719	chip2_peak_13967
chr7	109891000	109891200	200	238.586	4.33068	0.000958292	0.657618	chip2_peak_14326
chr6	143213900	143214100	200	238.622	4.33132	0.000708425	0.633695	chip2_peak_10878
chr2	156106200	156106500	300	238.624	4.33136	0.000305009	0.536793	chip2_peak_5330
chr16	32741200	32741400	200	238.651	4.33185	0.000508667	0.600294	chip2_peak_8101
chr2	58832700	58832900	200	238.653	4.33188	0.000929304	0.654701	chip2_peak_13935
chr15	88965500	88965700	200	238.697	4.33269	0.000931948	0.654719	chip2_peak_13972
chr14	113404000	113404200	200	238.8	4.33456	0.0008941	0.652391	chip2_peak_13455
chr3	135178500	135178700	200	238.811	4.33476	0.000397087	0.57225	chip2_peak_6568
chr17	14381200	14381500	300	238.911	4.33657	0.000430922	0.583172	chip2_peak_7015
chr17	64292700	64292900	200	238.952	4.33731	0.000383505	0.568576	chip2_peak_6383
chr9	41441000	41441200	200	238.952	4.33731	0.000383505	0.568576	chip2_peak_6385
chr14	77288400	77288600	200	238.995	4.33809	0.000832265	0.648327	chip2_peak_12570
chr8	110685700	110685900	200	239.04	4.33891	0.000342368	0.556009	chip2_peak_5805
chr10	50738200	50738400	200	239.064	4.33935	0.00062715	0.623987	chip2_peak_9744
chr1	121562500	121562800	300	239.078	4.33961	0.000188553	0.468312	chip2_peak_3711
chr3	118017900	118018200	300	239.1	4.34	0.000724383	0.637245	chip2_peak_11061
chr18	12992600	12992800	200	239.138	4.34068	0.000773329	0.643976	chip2_peak_11703
chr18	72698800	72699000	200	239.181	4.34147	0.000775525	0.643976	chip2_peak_11734
chr19	31762200	31762400	200	239.214	4.34207	0.000889463	0.651913	chip2_peak_13390
chr1	87285400	87285600	200	239.222	4.34222	0.000234594	0.500032	chip2_peak_4354
chr11	47305100	47305400	300	239.236	4.34246	0.000138841	0.425286	chip2_peak_2969
chr11	45249300	45249500	200	239.248	4.34268	0.000796934	0.645299	chip2_peak_12066
chr2	161071800	161072000	200	239.281	4.34328	0.000197732	0.476986	chip2_peak_3830
chr10	37256800	37257100	300	239.295	4.34353	0.000540774	0.606678	chip2_peak_8565
chr1	46022600	46022800	200	239.32	4.344	0.000624019	0.623754	chip2_peak_9693
chr1	175446100	175446300	200	239.409	4.34561	0.000585422	0.616408	chip2_peak_9166
chr2	144397300	144397500	200	239.414	4.3457	0.000258482	0.514825	chip2_peak_4674
chr5	48169000	48169200	200	239.535	4.34789	0.000619151	0.622723	chip2_peak_9632
chr4	106418800	106419100	300	239.544	4.34806	0.000436543	0.584866	chip2_peak_7086
chr13	112866900	112867100	200	239.584	4.34878	0.000664428	0.628686	chip2_peak_10262
chr1	13245600	13245800	200	239.635	4.34971	0.000453964	0.588348	chip2_peak_7354
chr1	193721400	193721600	200	239.641	4.34981	0.000249732	0.508444	chip2_peak_4561
chr17	67312300	67312600	300	239.699	4.35088	0.000599888	0.618135	chip2_peak_9386
chr5	113177300	113177500	200	239.705	4.35098	0.000371802	0.566295	chip2_peak_6215
chr1	19863500	19863700	200	239.718	4.35122	0.000721905	0.636385	chip2_peak_11040
chr13	69017700	69017900	200	239.718	4.35122	0.000503128	0.599984	chip2_peak_8011
chr2	92412500	92412700	200	239.753	4.35186	0.00014324	0.428927	chip2_peak_3048
chr4	147923800	147924000	200	239.793	4.35257	5.36489e-05	0.299335	chip2_peak_1581
chr13	43242400	43242600	200	239.848	4.35358	0.000892032	0.652032	chip2_peak_13433
chr1	186034900	186035100	200	239.848	4.35358	0.00092172	0.65458	chip2_peak_13796
chr12	14649100	14649300	200	239.865	4.35388	0.000200087	0.478533	chip2_peak_3865
chr6	148615500	148615700	200	239.874	4.35404	0.000690838	0.632282	chip2_peak_10623
chr9	58897600	58897800	200	239.879	4.35413	0.000964096	0.657711	chip2_peak_14406
chr3	9815200	9815400	200	239.879	4.35415	0.00079167	0.644502	chip2_peak_11991
chr6	89277600	89277800	200	239.89	4.35434	4.41281e-05	0.276659	chip2_peak_1392
chr6	17919900	17920100	200	239.917	4.35482	0.000659386	0.628179	chip2_peak_10192
chr2	48943900	48944100	200	239.97	4.3558	0.000964325	0.657711	chip2_peak_14411
chr7	132642500	132642700	200	239.989	4.35614	0.000657667	0.628032	chip2_peak_10163
chr12	47975000	47975200	200	240.001	4.35636	0.000978064	0.658047	chip2_peak_14608
chr12	8725000	8725200	200	240.039	4.35704	0.000378362	0.567617	chip2_peak_6304
chr13	97252500	97252700	200	240.07	4.35762	0.000305767	0.537011	chip2_peak_5340
chr11	17126600	17126800	200	240.078	4.35775	0.000885045	0.651913	chip2_peak_13318
chr2	12367700	12367900	200	240.082	4.35783	0.00018591	0.465605	chip2_peak_3674
chr10	105595100	105595300	200	240.123	4.35858	0.000887563	0.651913	chip2_peak_13359
chr7	57616800	57617000	200	240.133	4.35874	0.000495333	0.598657	chip2_peak_7913
chr16	81929600	81929800	200	240.135	4.35879	0.000480847	0.593474	chip2_peak_7741
chrX	74073900	74074100	200	240.181	4.35963	0.000981729	0.658047	chip2_peak_14664
chr11	20449200	20449400	200	240.181	4.35963	0.000981729	0.658047	chip2_peak_14665
chr10	126824500	126824700	200	240.181	4.35963	0.000981729	0.658047	chip2_peak_14666
chr5	12972900	12973100	200	240.181	4.35963	0.000981729	0.658047	chip2_peak_14667
chr1	56659700	56659900	200	240.2	4.35997	0.00088524	0.651913	chip2_peak_13321
chr7	13307700	13307900	200	240.202	4.36	0.000992141	0.659169	chip2_peak_14808
chr4	127738100	127738300	200	240.236	4.36063	0.000756168	0.641155	chip2_peak_11514
chr14	55919100	55919300	200	240.26	4.36105	0.000979156	0.658047	chip2_peak_14622
chr7	96293200	96293400	200	240.26	4.36105	0.000979156	0.658047	chip2_peak_14623
chr6	127013100	127013300	200	240.26	4.36105	0.000979156	0.658047	chip2_peak_14624
chr15	88785000	88785300	300	240.294	4.36167	3.24879e-06	0.0690996	chip2_peak_372
chr9	31129500	31130000	500	240.304	4.36185	6.80903e-05	0.332202	chip2_peak_1807
chr13	73670100	73670400	300	240.315	4.36206	0.000505959	0.600109	chip2_peak_8055
chr2	6863700	6864100	400	240.338	4.36247	0.000106633	0.3858	chip2_peak_2498
chr3	110085900	110086100	200	240.338	4.36247	0.00097659	0.658047	chip2_peak_14592
chr11	100069100	100069300	200	240.37	4.36305	0.000362596	0.56189	chip2_peak_6104
chr5	140951900	140952100	200	240.385	4.36332	0.000979372	0.658047	chip2_peak_14629
chr10	129304500	129304700	200	240.396	4.36353	0.000275781	0.525089	chip2_peak_4907
chr19	26480100	26480300	200	240.416	4.36389	0.000974031	0.65784	chip2_peak_14557
chr3	81029300	81029500	200	240.416	4.36389	0.000974031	0.65784	chip2_peak_14558
chr13	108240100	108240400	300	240.425	4.36406	0.000184234	0.46509	chip2_peak_3646
chr1	179633700	179634000	300	240.432	4.36417	7.08505e-05	0.335892	chip2_peak_1868
chr7	28122000	28122200	200	240.435	4.36423	0.000617219	0.622723	chip2_peak_9597
chr3	67216200	67216500	300	240.442	4.36436	0.000709693	0.63409	chip2_peak_10889
chr16	61461400	61461600	200	240.465	4.36477	0.000595877	0.617577	chip2_peak_9324
chr3	127946900	127947100	200	240.465	4.36477	0.000595877	0.617577	chip2_peak_9325
chr13	103301800	103302000	200	240.475	4.36496	0.000362675	0.56189	chip2_peak_6106
chr1	149683100	149683300	200	240.494	4.36531	0.000971479	0.657711	chip2_peak_14520
chr6	124938000	124938200	200	240.508	4.36556	9.02565e-05	0.362885	chip2_peak_2234
chr6	53042300	53042500	200	240.519	4.36575	0.000736596	0.638436	chip2_peak_11246
chr16	5972600	5972900	300	240.528	4.36593	0.000403123	0.573505	chip2_peak_6659
chr5	60379000	60379200	200	240.563	4.36656	0.000738686	0.638766	chip2_peak_11276
chr4	128207800	128208000	200	240.593	4.3671	0.000734673	0.638436	chip2_peak_11211
chr1	183219300	183219500	200	240.619	4.36758	0.000971694	0.657711	chip2_peak_14522
chr16	90646200	90646400	200	240.638	4.36791	0.000736758	0.638436	chip2_peak_11250
chr6	38612500	38612700	200	240.675	4.36859	0.000322126	0.546824	chip2_peak_5538
chr1	131671100	131671300	200	240.679	4.36866	0.000591235	0.617171	chip2_peak_9250
chr9	50976000	50976200	200	240.722	4.36945	0.000610814	0.621705	chip2_peak_9512
chr8	25798400	25798600	200	240.751	4.36996	0.000589696	0.61714	chip2_peak_9229
chr5	67668700	67669000	300	240.825	4.37131	3.8862e-05	0.259921	chip2_peak_1298
chr5	28918700	28918900	200	240.848	4.37173	0.0002374	0.50133	chip2_peak_4387
chr6	50296000	50296200	200	240.859	4.37193	0.000634586	0.625263	chip2_peak_9842
chr19	27581900	27582100	200	240.861	4.37196	0.000731004	0.638436	chip2_peak_11155
chr11	20080900	20081100	200	240.897	4.37261	0.000432537	0.583311	chip2_peak_7040
chr1	75764800	75765100	300	240.915	4.37294	0.00053186	0.60535	chip2_peak_8417
chr15	51182500	51182700	200	240.932	4.37324	0.000632933	0.624864	chip2_peak_9818
chr6	82823400	82823700	300	240.966	4.37386	0.00015238	0.437748	chip2_peak_3173
chr11	70637000	70637200	200	241.004	4.37456	0.000631285	0.624864	chip2_peak_9796
chr3	158047400	158047600	200	241.048	4.37536	0.000760067	0.642318	chip2_peak_11551
chr7	40496300	40496500	200	241.072	4.3758	0.000478112	0.592997	chip2_peak_7703
chr13	20058400	20058600	200	241.076	4.37587	0.00062964	0.624864	chip2_peak_9764
chr2	18170900	18171100	200	241.079	4.37591	0.000648668	0.626682	chip2_peak_10045
chr5	110701700	110702100	400	241.079	4.37592	6.30196e-05	0.323178	chip2_peak_1717
chr7	103636900	103637100	200	241.089	4.3761	0.0001491	0.436408	chip2_peak_3116
chr7	117510900	117511200	300	241.192	4.37797	6.96983e-05	0.333582	chip2_peak_1852
chr4	69115700	69115900	200	241.207	4.37825	0.00046173	0.590049	chip2_peak_7460
chr17	87016800	87017000	200	241.221	4.3785	0.000626365	0.623884	chip2_peak_9733
chr7	135176200	135176400	200	241.263	4.37927	0.000667016	0.628727	chip2_peak_10300
chr19	40958000	40958200	200	241.294	4.37982	0.000624734	0.623835	chip2_peak_9707
chr9	89912500	89912800	300	241.301	4.37995	7.88269e-05	0.344821	chip2_peak_2034
chr18	66298900	66299100	200	241.332	4.38052	0.000359608	0.560808	chip2_peak_6063
chr12	54806600	54806800	200	241.338	4.38062	0.000626504	0.623931	chip2_peak_9735
chr16	14458900	14459100	200	241.347	4.38079	0.000690114	0.632282	chip2_peak_10615
chr13	53770200	53770400	200	241.348	4.38081	0.000473167	0.592894	chip2_peak_7616
chr2	20697100	20697300	200	241.365	4.38111	0.000900971	0.653784	chip2_peak_13526
chr8	40638700	40638900	200	241.41	4.38193	0.000942892	0.656034	chip2_peak_14117
chr14	104537200	104537400	200	241.417	4.38206	0.000471939	0.592894	chip2_peak_7595
chr18	33988400	33988600	200	241.417	4.38206	0.000471939	0.592894	chip2_peak_7596
chr13	89549500	89549700	200	241.46	4.38284	0.000347324	0.556528	chip2_peak_5896
chr6	56904600	56904800	200	241.53	4.38411	0.000119647	0.402501	chip2_peak_2702
chr6	5186300	5186500	200	241.584	4.38508	0.000421311	0.580785	chip2_peak_6885
chr15	27889600	27889900	300	241.606	4.38549	0.000577493	0.613825	chip2_peak_9082
chr5	63315200	63315400	200	241.691	4.38704	0.00036653	0.563638	chip2_peak_6156
chr15	13516500	13516700	200	241.714	4.38745	0.000932537	0.654764	chip2_peak_13984
chr9	62909900	62910100	200	241.791	4.38884	0.000619582	0.622954	chip2_peak_9635
chr10	92204100	92204300	200	241.792	4.38886	0.000930097	0.654701	chip2_peak_13944
chr7	80796500	80796700	200	241.792	4.38886	0.000930097	0.654701	chip2_peak_13945
chr5	118366600	118366800	200	241.792	4.38886	0.000930097	0.654701	chip2_peak_13946
chr9	103789600	103789800	200	241.84	4.38974	0.000932746	0.654794	chip2_peak_13988
chrX	53270300	53270500	200	241.87	4.39028	0.000927664	0.65458	chip2_peak_13907
chr2	9805900	9806100	200	241.87	4.39028	0.000927664	0.65458	chip2_peak_13908
chr4	100159900	100160100	200	241.918	4.39116	0.000930306	0.654701	chip2_peak_13951
chr1	100729200	100729400	200	241.918	4.39116	0.000930306	0.654701	chip2_peak_13952
chr15	100514600	100514800	200	241.924	4.39126	7.8061e-05	0.34457	chip2_peak_2020
chr5	42417900	42418100	200	241.948	4.3917	0.000925237	0.65458	chip2_peak_13859
chr4	85151800	85152000	200	241.948	4.3917	0.000925237	0.65458	chip2_peak_13860
chr1	13014900	13015100	200	241.974	4.39217	0.000699828	0.632506	chip2_peak_10765
chr9	8227200	8227400	200	241.995	4.39256	0.000372902	0.566295	chip2_peak_6232
chr11	36549900	36550100	200	242.027	4.39312	0.000922817	0.65458	chip2_peak_13818
chr18	64018500	64018700	200	242.027	4.39312	0.000922817	0.65458	chip2_peak_13819
chr3	51005500	51005700	200	242.027	4.39312	0.000922817	0.65458	chip2_peak_13820
chr13	98596400	98596600	200	242.124	4.39489	0.000563393	0.610954	chip2_peak_8884
chr1	153858400	153858600	200	242.14	4.39517	0.000256711	0.513301	chip2_peak_4658
chr13	81302100	81302300	200	242.153	4.39542	0.000923025	0.65458	chip2_peak_13825
chr9	37013200	37013400	200	242.153	4.39542	0.000923025	0.65458	chip2_peak_13826
chr7	39945000	39945200	200	242.177	4.39585	0.000719287	0.636033	chip2_peak_11007
chr11	116072200	116072400	200	242.18	4.39591	4.34968e-05	0.273855	chip2_peak_1385
chr7	128200200	128200400	200	242.196	4.39619	0.000561928	0.610954	chip2_peak_8860
chr9	106358100	106358300	200	242.196	4.39619	0.000561928	0.610954	chip2_peak_8861
chr11	11223600	11223800	200	242.231	4.39684	0.000128191	0.412336	chip2_peak_2823
chr7	105771800	105772000	200	242.279	4.39771	0.000667172	0.628727	chip2_peak_10303
chr17	63107400	63107600	200	242.288	4.39786	0.000621186	0.623354	chip2_peak_9650
chr2	160656600	160656800	200	242.41	4.40008	0.000912797	0.65458	chip2_peak_13656
chr15	6576900	6577100	200	242.426	4.40037	0.000454372	0.588451	chip2_peak_7360
chr4	6057700	6057900	200	242.469	4.40115	0.000601541	0.618548	chip2_peak_9408
chr9	98232700	98232900	200	242.486	4.40146	0.000998268	0.660034	chip2_peak_14884
chrX	53015500	53015700	200	242.496	4.40165	0.000598281	0.617901	chip2_peak_9359
chr13	80973200	80973400	200	242.496	4.40165	0.000598281	0.617901	chip2_peak_9360
chr11	79406100	79406300	200	242.496	4.40165	0.000598281	0.617901	chip2_peak_9361
chr1	186051800	186052000	200	242.496	4.40165	0.000598281	0.617901	chip2_peak_9362
chr7	138040700	138040900	200	242.564	4.40288	0.00045202	0.587882	chip2_peak_7322
chr9	122263700	122263900	200	242.564	4.40288	0.00045202	0.587882	chip2_peak_7323
chr18	67928000	67928200	200	242.619	4.40388	0.00028536	0.529829	chip2_peak_5027
chr2	79348700	79348900	200	242.623	4.40395	0.000437677	0.585063	chip2_peak_7106
chr10	120741400	120741600	200	242.633	4.40412	0.000814687	0.646726	chip2_peak_12320
chr10	29297000	29297200	200	242.633	4.40413	0.000450848	0.587797	chip2_peak_7303
chr19	20954300	20954500	200	242.633	4.40413	0.000450848	0.587797	chip2_peak_7304
chr18	66399300	66399500	200	242.692	4.4052	0.000436543	0.584866	chip2_peak_7085
chr3	92534200	92534400	200	242.692	4.4052	0.000436543	0.584866	chip2_peak_7087
chr9	18509400	18509600	200	242.71	4.40552	0.000403552	0.573505	chip2_peak_6665
chr3	123343900	123344200	300	242.744	4.40615	4.23446e-05	0.270347	chip2_peak_1367
chr2	73057700	73058000	300	242.781	4.40682	0.000210471	0.485669	chip2_peak_4009
chr14	57573900	57574100	200	242.829	4.40768	0.00030447	0.536517	chip2_peak_5324
chr19	32015500	32015700	200	242.831	4.40773	0.000593761	0.617261	chip2_peak_9296
chr10	108835300	108835500	200	242.904	4.40905	0.000592217	0.617171	chip2_peak_9269
chr18	73939400	73939600	200	242.904	4.40905	0.000592217	0.617171	chip2_peak_9270
chr13	100041300	100041500	200	242.913	4.40921	0.000400426	0.572901	chip2_peak_6619
chr11	59038600	59038800	200	242.913	4.40921	0.000400426	0.572901	chip2_peak_6620
chr14	108692500	108692700	200	242.927	4.40946	0.000449882	0.587543	chip2_peak_7284
chr12	13513400	13513600	200	242.947	4.40984	0.000294087	0.532796	chip2_peak_5168
chr13	18098600	18098800	200	242.949	4.40986	0.000862677	0.651913	chip2_peak_12951
chr7	79872600	79872800	200	242.969	4.41023	0.000124654	0.409308	chip2_peak_2762
chr8	54928100	54928300	200	242.988	4.41057	0.00049195	0.598121	chip2_peak_7861
chr8	116069500	116069800	300	243.086	4.41235	0.000113323	0.3939	chip2_peak_2609
chr6	22289700	22290100	400	243.116	4.4129	0.000132027	0.417161	chip2_peak_2874
chr16	77000600	77000800	200	243.143	4.41338	0.000740068	0.638827	chip2_peak_11290
chr15	11794300	11794500	200	243.159	4.41368	0.000398446	0.572401	chip2_peak_6591
chr3	157020200	157020400	200	243.195	4.41433	0.000614505	0.622176	chip2_peak_9557
chr7	77147600	77147800	200	243.246	4.41526	0.000885886	0.651913	chip2_peak_13335
chr9	69027200	69027400	200	243.286	4.41599	0.000213422	0.48688	chip2_peak_4055
chr10	82809300	82809500	200	243.324	4.41668	0.000883572	0.651913	chip2_peak_13291
chr7	37110400	37110600	200	243.324	4.41668	0.000883572	0.651913	chip2_peak_13292
chr2	11965400	11965600	200	243.324	4.41668	0.000883572	0.651913	chip2_peak_13293
chr1	91830300	91830500	200	243.325	4.4167	0.000555854	0.610384	chip2_peak_8771
chr2	25642500	25642700	200	243.348	4.41711	0.000212873	0.486524	chip2_peak_4047
chr3	37748600	37748900	300	243.393	4.41792	0.000221525	0.491606	chip2_peak_4174
chr18	6166700	6166900	200	243.403	4.4181	0.000881264	0.651913	chip2_peak_13245
chr3	97175600	97175800	200	243.403	4.4181	0.000881264	0.651913	chip2_peak_13246
chr9	113092700	113092900	200	243.403	4.4181	0.000881264	0.651913	chip2_peak_13247
chr11	94930500	94930800	300	243.444	4.41885	0.000200816	0.478582	chip2_peak_3879
chr17	35720500	35720700	200	243.453	4.41902	1.69306e-05	0.17862	chip2_peak_799
chr18	7235300	7235500	200	243.455	4.41905	0.000107447	0.386054	chip2_peak_2515
chr1	149844700	149844900	200	243.481	4.41952	0.000878963	0.651913	chip2_peak_13207
chr11	44929600	44929800	200	243.53	4.42042	0.000881466	0.651913	chip2_peak_13257
chr13	26744800	26745000	200	243.567	4.42108	0.000685215	0.631413	chip2_peak_10550
chr6	145735300	145735500	200	243.627	4.42217	0.000784013	0.643976	chip2_peak_11867
chr4	123574900	123575100	200	243.642	4.42245	0.000591814	0.617171	chip2_peak_9259
chr16	5828500	5828700	200	243.659	4.42275	0.00014305	0.428886	chip2_peak_3044
chr7	24568500	24568700	200	243.66	4.42278	0.000752766	0.640016	chip2_peak_11480
chr10	118881200	118881400	200	243.699	4.42348	0.00057298	0.611939	chip2_peak_9035
chr4	95382200	95382400	200	243.74	4.42423	0.000871704	0.651913	chip2_peak_13086
chr1	178467600	178467800	200	243.78	4.42494	0.000431843	0.583311	chip2_peak_7027
chr10	102825200	102825400	200	243.78	4.42495	0.000779931	0.643976	chip2_peak_11799
chr14	20076900	20077100	200	243.818	4.42563	0.000809674	0.646243	chip2_peak_12245
chr7	49758500	49758700	200	243.844	4.42611	0.000570008	0.611324	chip2_peak_8992
chr6	126472000	126472200	200	243.844	4.42611	0.000570008	0.611324	chip2_peak_8993
chr15	32590700	32591100	400	243.853	4.42627	3.80063e-05	0.257699	chip2_peak_1282
chr10	75626000	75626300	300	243.86	4.42641	0.000175739	0.457371	chip2_peak_3528
chr9	100636500	100636700	200	243.861	4.42642	0.000587214	0.616533	chip2_peak_9197
chr12	32916700	32916900	200	243.916	4.42743	0.000568528	0.611314	chip2_peak_8964
chr11	5144700	5144900	200	243.916	4.42743	0.000568528	0.611314	chip2_peak_8965
chr17	76434500	76434700	200	243.916	4.42743	0.000568528	0.611314	chip2_peak_8966
chr2	120936300	120936500	200	243.918	4.42745	0.00042961	0.583172	chip2_peak_6992
chr7	88347400	88347600	200	243.982	4.42862	0.000778076	0.643976	chip2_peak_11777
chr3	106133100	106133300	200	243.989	4.42874	0.000567052	0.611314	chip2_peak_8940
chr1	164006700	164006900	200	244.059	4.43001	0.000776049	0.643976	chip2_peak_11744
chr1	66712500	66712700	200	244.061	4.43005	0.00056558	0.610957	chip2_peak_8921
chr11	3525900	3526100	200	244.089	4.43055	0.000156346	0.440559	chip2_peak_3244
chr17	46698400	46698600	200	244.099	4.43075	4.18154e-05	0.268839	chip2_peak_1354
chr9	42934800	42935000	200	244.134	4.43137	0.000570544	0.611324	chip2_peak_9003
chr7	45296700	45296900	200	244.173	4.43209	7.68708e-05	0.343319	chip2_peak_1994
chr11	88612600	88612800	200	244.292	4.43424	0.000609822	0.621113	chip2_peak_9505
chr10	93095700	93095900	200	244.31	4.43456	0.000159574	0.442487	chip2_peak_3301
chr18	42537200	42537400	200	244.311	4.43458	0.00037962	0.567779	chip2_peak_6323
chr14	66795300	66795500	200	244.33	4.43494	0.000644272	0.626297	chip2_peak_9981
chr17	34045800	34046000	200	244.37	4.43566	0.00076965	0.643615	chip2_peak_11666
chr14	57982100	57982400	300	244.371	4.43568	7.71934e-05	0.343746	chip2_peak_2002
chr8	125883500	125883700	200	244.446	4.43704	0.000377661	0.567493	chip2_peak_6296
chr8	4305300	4305500	200	244.471	4.4375	0.000363384	0.56197	chip2_peak_6118
chr2	124130200	124130400	200	244.512	4.43824	0.000277481	0.525612	chip2_peak_4933
chr14	11752300	11752600	300	244.568	4.43926	0.000289219	0.531461	chip2_peak_5089
chr12	107854700	107854900	200	244.735	4.44228	0.000404168	0.573783	chip2_peak_6672
chr4	135199400	135199600	200	244.759	4.44272	0.000140445	0.426765	chip2_peak_2999
chr4	127525600	127525800	200	244.779	4.44308	0.000841642	0.649182	chip2_peak_12686
chr9	58201400	58201600	200	244.815	4.44373	0.000145031	0.430411	chip2_peak_3075
chr13	71114300	71114600	300	244.868	4.4447	0.000135431	0.421757	chip2_peak_2917
chr3	9326600	9326900	300	244.892	4.44513	0.000687063	0.631661	chip2_peak_10576
chr8	80854500	80854800	300	244.898	4.44525	0.000659242	0.628179	chip2_peak_10188
chr6	48071400	48071600	200	244.951	4.44621	0.000611723	0.621856	chip2_peak_9520
chr9	3179900	3180100	200	244.986	4.44683	0.000839643	0.648953	chip2_peak_12670
chr14	64038900	64039100	200	245.047	4.44794	0.000718932	0.635996	chip2_peak_11002
chr17	15831200	15831400	200	245.08	4.44855	0.000843238	0.649182	chip2_peak_12714
chr11	96153200	96153400	200	245.119	4.44926	0.000544522	0.60739	chip2_peak_8613
chr1	58503800	58504000	200	245.119	4.44926	0.000544522	0.60739	chip2_peak_8614
chr1	71257900	71258100	200	245.119	4.44926	0.000544522	0.60739	chip2_peak_8615
chr8	42211100	42211300	200	245.128	4.44943	0.000744927	0.639095	chip2_peak_11371
chr13	9722500	9722700	200	245.133	4.44951	0.000442309	0.586253	chip2_peak_7172
chr6	81164900	81165100	200	245.142	4.44967	0.000835271	0.648364	chip2_peak_12616
chr16	71040000	71040200	200	245.143	4.44969	0.000560949	0.610954	chip2_peak_8846
chr6	8378400	8378600	200	245.143	4.44969	0.000560949	0.610954	chip2_peak_8847
chr5	17776900	17777100	200	245.143	4.44969	0.000560949	0.610954	chip2_peak_8848
chr5	119955000	119955200	200	245.205	4.45082	0.000742988	0.639	chip2_peak_11343
chr10	71155600	71155800	200	245.255	4.45172	0.000745101	0.639163	chip2_peak_11373
chr19	41260200	41260400	200	245.264	4.45189	0.000541701	0.607022	chip2_peak_8572
chr13	24236600	24236800	200	245.282	4.45221	0.000741054	0.638827	chip2_peak_11313
chr2	130729500	130729700	200	245.282	4.45221	0.000741054	0.638827	chip2_peak_11314
chr1	72760800	72761000	200	245.288	4.45233	0.000558043	0.610822	chip2_peak_8804
chr13	29933500	29933800	300	245.302	4.45257	0.000403358	0.573505	chip2_peak_6663
chr18	65522400	65522700	300	245.336	4.4532	0.000513508	0.601126	chip2_peak_8171
chr15	42959600	42959800	200	245.336	4.4532	0.000540297	0.606545	chip2_peak_8559
chr14	62953400	62953600	200	245.336	4.4532	0.000540297	0.606545	chip2_peak_8560
chrX	136183100	136183500	400	245.343	4.45332	7.49034e-05	0.340671	chip2_peak_1954
chr9	54549400	54549600	200	245.349	4.45343	0.000529174	0.60498	chip2_peak_8378
chr2	122345700	122345900	200	245.358	4.4536	0.000739126	0.638827	chip2_peak_11280
chr11	50330700	50330900	200	245.434	4.45498	0.000575018	0.612626	chip2_peak_9059
chr5	20764700	20764900	200	245.562	4.45729	0.000737375	0.638483	chip2_peak_11259
chr3	159263300	159263500	200	245.562	4.45729	0.000737375	0.638483	chip2_peak_11260
chr7	43584800	43585000	200	245.563	4.45732	8.29265e-05	0.350434	chip2_peak_2110
chr9	77597300	77597500	200	245.577	4.45757	0.000323193	0.547727	chip2_peak_5551
chr10	96202800	96203300	500	245.621	4.45836	1.0439e-06	0.035573	chip2_peak_234
chr5	100847900	100848100	200	245.625	4.45843	0.000739903	0.638827	chip2_peak_11288
chr8	10027200	10027400	200	245.711	4.46001	0.000613836	0.622103	chip2_peak_9549
chr11	80852200	80852400	200	245.714	4.46005	0.000264488	0.519255	chip2_peak_4749
chr5	131593000	131593200	200	245.76	4.46089	0.000649912	0.626722	chip2_peak_10065
chr15	79018100	79018300	200	245.786	4.46135	0.000612243	0.621921	chip2_peak_9526
chr17	84097700	84097900	200	245.791	4.46145	8.65872e-05	0.356464	chip2_peak_2176
chr17	62775200	62775400	200	245.811	4.46181	6.67823e-05	0.331137	chip2_peak_1782
chr8	111307700	111307900	200	245.815	4.46188	0.000462642	0.59009	chip2_peak_7479
chr1	175596900	175597200	300	245.835	4.46225	1.53177e-05	0.171142	chip2_peak_748
chr11	40600900	40601100	200	245.883	4.46312	0.000811174	0.646319	chip2_peak_12274
chr2	69020400	69020600	200	245.9	4.46342	0.000220049	0.491396	chip2_peak_4149
chr7	130965100	130965400	300	245.902	4.46346	0.000285252	0.529829	chip2_peak_5026
chr14	27628300	27628600	300	245.93	4.46397	0.000436995	0.585047	chip2_peak_7090
chr2	39406800	39407000	200	245.949	4.46433	0.000242091	0.504004	chip2_peak_4453
chr1	88451000	88451200	200	245.961	4.46454	0.000809062	0.646243	chip2_peak_12229
chr9	62192800	62193000	200	245.963	4.46458	5.74706e-05	0.308534	chip2_peak_1640
chr16	32882800	32883000	200	245.979	4.46487	0.000129737	0.41347	chip2_peak_2846
chr19	21514200	21514400	200	246.013	4.46548	0.000811366	0.64632	chip2_peak_12278
chr1	109247700	109248000	300	246.035	4.46588	4.18275e-05	0.268839	chip2_peak_1355
chr7	40242100	40242300	200	246.051	4.46618	0.000143583	0.4292	chip2_peak_3054
chrX	129599700	129599900	200	246.148	4.46793	0.000175791	0.457371	chip2_peak_3532
chr7	101087900	101088200	300	246.154	4.46805	0.000271982	0.52388	chip2_peak_4846
chr15	88726300	88726600	300	246.217	4.46918	0.000222547	0.491951	chip2_peak_4191
chr2	29572900	29573100	200	246.336	4.47134	0.00052368	0.603429	chip2_peak_8300
chr6	134390000	134390200	200	246.39	4.47232	0.000256295	0.512846	chip2_peak_4655
chr8	19236700	19236900	200	246.467	4.47372	0.00051886	0.602542	chip2_peak_8233
chr4	68067700	68067900	200	246.477	4.4739	0.000711542	0.634214	chip2_peak_10911
chr11	100053900	100054100	200	246.553	4.47529	0.000709693	0.63409	chip2_peak_10888
chr2	168962000	168962200	200	246.63	4.47668	0.000707849	0.633695	chip2_peak_10867
chr6	106107400	106107600	200	246.643	4.47692	0.00053174	0.605315	chip2_peak_8415
chr16	11213400	11213700	300	246.684	4.47765	0.000375287	0.566396	chip2_peak_6271
chr17	84322400	84322600	200	246.716	4.47824	0.000630052	0.624864	chip2_peak_9769
chr1	106737500	106737800	300	246.745	4.47877	0.000769207	0.643615	chip2_peak_11654
chr6	107280700	107280900	200	246.758	4.479	0.000708017	0.633695	chip2_peak_10869
[truncated: 3,165 more rows]
