# Supplementary material for: LncRNA Snhg3 aggravates hepatic steatosis via PPARγ signaling
Source: eLife. 2024 Oct 22;13:RP96988. doi: 10.7554/eLife.96988 (PMC11495842; doi:10.7554/eLife.96988)
Supplement: Figure 5—source data 1. [file elife-96988-fig5-data1.xls]

## Sheet: Snhg3_MS
Accession	Protein names	Gene names	MW [kDa]	Protein score	Sequence coverage (%)	# Unique Peptides	# Peptides	# PSMs
Q8C196	Carbamoyl-phosphate synthase [ammonia], mitochondrial	Cps1	164.514	3084.12	50.33	54	54	77
Q03265	ATP synthase subunit alpha, mitochondrial	Atp5f1a	59.7156	1661.79	52.98	25	25	37
P56480	ATP synthase subunit beta, mitochondrial	Atp5f1b	56.2655	1658.7	61.63	21	21	36
Q8BWT1	3-ketoacyl-CoA thiolase, mitochondrial	Acaa2	41.8034	1155.98	56.93	16	16	30
Q91V92	ATP-citrate synthase	Acly	119.651	803.587	15.67	15	15	17
P16460	Argininosuccinate synthase	Ass1	46.555	800.359	39.81	16	16	22
Q8VDJ3	Vigilin	Hdlbp	141.655	779.697	20.74	18	18	19
P33267	Cytochrome P450 2F2	Cyp2f2	55.913	777.263	37.27	15	16	20
P05784	Keratin, type I cytoskeletal 18	Krt18	47.5092	766.962	41.13	12	14	15
Q91YI0	Argininosuccinate lyase	Asl	51.7066	726.575	32.11	14	14	17
Q8BMS1	Trifunctional enzyme subunit alpha, mitochondrial	Hadha	82.6175	667.67	21.76	11	11	14
P10126	Elongation factor 1-alpha 1	Eef1a1	50.0821	641.458	30.52	12	12	17
P60710	Actin, cytoplasmic 1	Actb	41.7097	633.883	36.53	11	11	17
P24456	Cytochrome P450 2D10	Cyp2d10	57.1965	612.911	21.43	5	9	12
P11679	Keratin, type II cytoskeletal 8	Krt8	54.5315	601.905	24.49	9	14	17
P41216	Long-chain-fatty-acid--CoA ligase 1	Acsl1	77.9014	570.433	25.61	14	15	18
P54869	Hydroxymethylglutaryl-CoA synthase, mitochondrial	Hmgcs2	56.7865	564.661	33.86	14	14	14
P63017	Heat shock cognate 71 kDa protein	Hspa8	70.8272	560.006	25.39	9	11	11
Q9QXX4	Calcium-binding mitochondrial carrier protein Aralar2	Slc25a13	74.4198	550.085	21.6	13	13	15
Q9ET01	Glycogen phosphorylase, liver form	Pygl	97.401	512.615	18	14	14	16
Q9DBM2	Peroxisomal bifunctional enzyme	Ehhadh	78.252	511.903	20.06	13	13	13
Q99LC5	Electron transfer flavoprotein subunit alpha, mitochondrial	Etfa	34.9875	504.936	47.75	11	11	13
P11714	Cytochrome P450 2D9	Cyp2d9	56.9133	502.131	22.62	7	9	10
P53657	Pyruvate kinase PKLR	Pklr	62.2696	463.015	19.86	9	9	10
O08601	Microsomal triglyceride transfer protein large subunit	Mttp	99.0366	433.983	15.66	11	11	11
P16858	Glyceraldehyde-3-phosphate dehydrogenase	Gapdh	35.7872	417.468	34.83	7	7	9
Q64374	Regucalcin	Rgn	33.3855	414.66	21.74	6	6	8
Q8CIM7	Cytochrome P450 2D26	Cyp2d26	56.9393	403.394	20.4	7	9	11
Q9DB77	Cytochrome b-c1 complex subunit 2, mitochondrial	Uqcrc2	48.205	403.25	22.74	7	7	9
P16331	Phenylalanine-4-hydroxylase	Pah	51.8674	402.664	20.75	9	9	11
P20029	Endoplasmic reticulum chaperone BiP	Hspa5	72.3775	402.347	19.08	7	9	9
P00329	Alcohol dehydrogenase 1	Adh1	39.7456	390.637	31.73	9	9	10
P17717	UDP-glucuronosyltransferase 2B17	Ugt2b17	60.8161	384.522	16.04	6	6	9
P26443	Glutamate dehydrogenase 1, mitochondrial	Glud1	61.2982	379.334	16.13	8	8	9
Q922U2	Keratin, type II cytoskeletal 5	Krt5	61.7286	377.834	10.86	1	8	11
P50544	Very long-chain specific acyl-CoA dehydrogenase, mitochondrial	Acadvl	70.8307	377.346	16.31	7	7	8
P05213	Tubulin alpha-1B chain	Tuba1b	50.1196	376.401	24.39	3	8	9
P97872	Dimethylaniline monooxygenase [N-oxide-forming] 5	Fmo5	59.962	362.592	16.51	9	9	10
Q8BGZ7	Keratin, type II cytoskeletal 75	Krt75	59.7039	351.87	13.25	1	8	10
Q91YQ5	Dolichyl-diphosphooligosaccharide--protein glycosyltransferase subunit 1	Rpn1	68.4857	351.012	16.28	9	9	9
P11499	Heat shock protein HSP 90-beta	Hsp90ab1	83.2291	346.804	11.46	2	8	8
P06151	L-lactate dehydrogenase A chain	Ldha	36.4752	337.493	27.11	9	9	9
O35129	Prohibitin-2	Phb2	33.2759	330.734	26.76	7	7	8
P17182	Alpha-enolase	Eno1	47.1112	327.647	17.28	3	6	6
Q9Z2I8	Succinate--CoA ligase [GDP-forming] subunit beta, mitochondrial	Suclg2	46.8107	327.391	20.79	8	8	8
Q63886	UDP-glucuronosyltransferase 1-1	Ugt1a1	60.008	325.799	15.51	6	8	10
Q05421	Cytochrome P450 2E1	Cyp2e1	56.7686	325.572	14	7	7	9
P51881	ADP/ATP translocase 2	Slc25a5	32.9102	322.508	32.89	8	8	10
P68368	Tubulin alpha-4A chain	Tuba4a	49.8924	316.607	20.09	2	7	8
Q78PY7	Staphylococcal nuclease domain-containing protein 1	Snd1	102.025	310.811	9.45	6	6	6
P67778	Prohibitin	Phb	29.8019	306.253	32.35	8	8	8
O88844	Isocitrate dehydrogenase [NADP] cytoplasmic	Idh1	46.6445	296.332	16.43	6	6	7
P07901	Heat shock protein HSP 90-alpha	Hsp90aa1	84.7348	294.512	10.64	1	7	7
Q9Z2I9	Succinate--CoA ligase [ADP-forming] subunit beta, mitochondrial	Sucla2	50.0821	294.176	13.39	5	5	5
P50247	Adenosylhomocysteinase	Ahcy	47.6573	288.505	15.74	6	6	6
Q8VC30	Triokinase/FMN cyclase	Tkfc	59.6534	286.123	17.3	7	7	8
O88451	Retinol dehydrogenase 7	Rdh7	35.6373	284.189	23.1	5	7	8
P00405	Cytochrome c oxidase subunit 2	Mtco2	25.959	281.113	30.84	6	6	8
Q3TTY5	Keratin, type II cytoskeletal 2 epidermal	Krt2	70.8798	280.392	6.79	4	6	8
Q8CHT0	Delta-1-pyrroline-5-carboxylate dehydrogenase, mitochondrial	Aldh4a1	61.8015	280.322	13.17	6	6	7
Q9QWL7	Keratin, type I cytoskeletal 17	Krt17	48.1321	276.529	12.47	3	7	8
Q9Z0X1	Apoptosis-inducing factor 1, mitochondrial	Aifm1	66.7238	271.592	12.58	6	6	6
P99024	Tubulin beta-5 chain	Tubb5	49.639	271.114	17.79	2	6	7
P62908	40S ribosomal protein S3	Rps3	26.6574	268.644	32.1	7	7	7
Q9DBG6	Dolichyl-diphosphooligosaccharide--protein glycosyltransferase subunit 2	Rpn2	69.02	266.533	13.63	5	5	5
Q3UQ44	Ras GTPase-activating-like protein IQGAP2	Iqgap2	180.416	266.299	4.63	6	6	6
P14869	60S acidic ribosomal protein P0	Rplp0	34.1948	263.608	25.55	5	5	7
Q07417	Short-chain specific acyl-CoA dehydrogenase, mitochondrial	Acads	44.8611	262.701	18.93	6	6	6
O35423	Serine--pyruvate aminotransferase, mitochondrial	Agxt	45.8828	261.425	14.73	5	5	5
Q4LDG0	Bile acyl-CoA synthetase	Slc27a5	76.154	258.355	9	5	5	5
P34914	Bifunctional epoxide hydrolase 2	Ephx2	62.4746	256.532	13.36	5	5	6
P68372	Tubulin beta-4B chain	Tubb4b	49.799	254.501	21.12	2	6	7
O35488	Very long-chain acyl-CoA synthetase	Slc27a2	70.3775	254.413	16.45	8	8	9
Q9DBG1	Sterol 26-hydroxylase, mitochondrial	Cyp27a1	60.6819	249.871	18.2	6	6	7
Q9DCW4	Electron transfer flavoprotein subunit beta	Etfb	27.606	248.967	29.02	6	6	6
Q9WUM5	Succinate--CoA ligase [ADP/GDP-forming] subunit alpha, mitochondrial	Suclg1	36.132	247.41	17.05	4	4	5
Q8VED5	Keratin, type II cytoskeletal 79	Krt79	57.5168	242.76	7.34	1	5	7
Q99JY0	Trifunctional enzyme subunit beta, mitochondrial	Hadhb	51.3534	236.133	13.47	6	6	7
Q9WVL0	Maleylacetoacetate isomerase	Gstz1	24.2598	230.595	43.06	7	7	8
P17183	Gamma-enolase	Eno2	47.267	229.475	11.75	1	4	4
Q6ZWN5	40S ribosomal protein S9	Rps9	22.5776	226.75	31.96	7	7	7
Q8CAQ8	MICOS complex subunit Mic60	Immt	83.8482	225.171	8.45	5	5	5
P04104	Keratin, type II cytoskeletal 1	Krt1	65.5653	224.518	6.12	3	5	6
P02535	Keratin, type I cytoskeletal 10	Krt10	57.7351	224.302	8.42	3	5	5
Q8VCW8	Acyl-CoA synthetase family member 2, mitochondrial	Acsf2	67.907	224.146	12.03	6	6	6
Q64459	Cytochrome P450 3A11	Cyp3a11	57.817	223.083	13.1	5	5	6
P00186	Cytochrome P450 1A2	Cyp1a2	58.1471	223.018	11.5	4	4	4
Q91VR2	ATP synthase subunit gamma, mitochondrial	Atp5f1c	32.8651	219.304	22.48	6	6	6
Q99K67	Alpha-aminoadipic semialdehyde synthase, mitochondrial	Aass	102.909	217.3	7.24	5	5	5
Q80XN0	D-beta-hydroxybutyrate dehydrogenase, mitochondrial	Bdh1	38.2744	213.411	16.91	4	4	5
P40936	Indolethylamine N-methyltransferase	Inmt	29.4408	210.717	17.42	3	3	6
Q60759	Glutaryl-CoA dehydrogenase, mitochondrial	Gcdh	48.5749	210.419	15.3	5	5	5
P56593	Cytochrome P450 2A12	Cyp2a12	56.1431	210.364	9.15	4	4	4
P63038	60 kDa heat shock protein, mitochondrial	Hspd1	60.9174	207.477	10.3	5	5	5
P62754	40S ribosomal protein S6	Rps6	28.663	207.17	22.89	5	5	5
P11725	Ornithine carbamoyltransferase, mitochondrial	Otc	39.7396	207.021	16.38	5	5	5
Q8BFR5	Elongation factor Tu, mitochondrial	Tufm	49.477	206.394	16.59	6	6	6
P97351	40S ribosomal protein S3a	Rps3a	29.8657	205.26	18.18	4	4	5
Q9CXN7	Phenazine biosynthesis-like domain-containing protein 2	Pbld2	31.9633	198.45	18.4	4	4	4
P46978	Dolichyl-diphosphooligosaccharide--protein glycosyltransferase subunit STT3A	Stt3a	80.5449	193.942	8.09	6	6	6
Q6IFX2	Keratin, type I cytoskeletal 42	Krt42	50.1019	191.228	10.4	2	5	5
O70475	UDP-glucose 6-dehydrogenase	Ugdh	54.7973	188.25	15.01	5	5	5
P42125	Enoyl-CoA delta isomerase 1, mitochondrial	Eci1	32.2298	185.07	14.88	3	3	4
Q64458	Cytochrome P450 2C29	Cyp2c29	55.6798	179.614	10.41	3	5	5
O08749	Dihydrolipoyl dehydrogenase, mitochondrial	Dld	54.2382	179.314	8.64	4	4	4
Q9DBW0	Cytochrome P450 4V2	Cyp4v2	60.8995	178.647	11.05	5	5	5
Q99PG0	Arylacetamide deacetylase	Aadac	45.2213	178.082	19.85	5	5	5
P47738	Aldehyde dehydrogenase, mitochondrial	Aldh2	56.5018	177.941	11.56	5	5	5
P05202	Aspartate aminotransferase, mitochondrial	Got2	47.3812	176.228	9.77	4	4	4
P47911	60S ribosomal protein L6	Rpl6	33.4889	175.38	16.55	4	4	6
Q9DBA8	Probable imidazolonepropionase	Amdhd1	46.4586	172.883	10.56	4	4	4
P62242	40S ribosomal protein S8	Rps8	24.1902	172.854	24.52	4	4	4
Q9DB20	ATP synthase subunit O, mitochondrial	Atp5o	23.3487	172.816	22.07	3	3	4
Q62452	UDP-glucuronosyltransferase 1-9	Ugt1a9	59.9687	172.296	7.01	2	4	5
P45952	Medium-chain specific acyl-CoA dehydrogenase, mitochondrial	Acadm	46.4516	171.611	13.78	4	4	4
P97807	Fumarate hydratase, mitochondrial	Fh	54.3221	168.336	9.66	3	3	3
Q922D8	C-1-tetrahydrofolate synthase, cytoplasmic	Mthfd1	101.136	167.317	5.13	4	4	4
Q8BWQ1	UDP-glucuronosyltransferase 2A3	Ugt2a3	61.0793	166.172	9.74	5	5	5
Q05920	Pyruvate carboxylase, mitochondrial	Pc	129.602	161.709	4.92	5	5	5
P14206	40S ribosomal protein SA	Rpsa	32.8174	159.993	10.17	2	2	2
Q8BH00	Aldehyde dehydrogenase family 8 member A1	Aldh8a1	53.6295	159.051	12.32	3	3	3
P80318	T-complex protein 1 subunit gamma	Cct3	60.5914	158.189	7.34	4	4	4
Q91YT0	NADH dehydrogenase [ubiquinone] flavoprotein 1, mitochondrial	Ndufv1	50.8017	156.941	7.11	3	3	3
Q64435	UDP-glucuronosyltransferase 1-6	Ugt1a6	60.399	155.665	6.97	2	4	5
P47963	60S ribosomal protein L13	Rpl13	24.2905	151.986	17.54	4	4	4
P54071	Isocitrate dehydrogenase [NADP], mitochondrial	Idh2	50.8739	151.074	6.86	3	3	3
Q9Z2Z6	Mitochondrial carnitine/acylcarnitine carrier protein	Slc25a20	33.0049	150.747	11.3	4	4	4
Q9D0M3	Cytochrome c1, heme protein, mitochondrial	Cyc1	35.3049	150.57	11.08	2	2	3
P38647	Stress-70 protein, mitochondrial	Hspa9	73.4156	148.69	6.33	4	4	4
Q91VD9	NADH-ubiquinone oxidoreductase 75 kDa subunit, mitochondrial	Ndufs1	79.7256	146.119	4.81	3	3	3
Q9DC69	NADH dehydrogenase [ubiquinone] 1 alpha subcomplex subunit 9, mitochondrial	Ndufa9	42.4984	145.118	11.14	4	4	4
P10649	Glutathione S-transferase Mu 1	Gstm1	25.9531	140.379	17.43	3	3	3
Q8JZR0	Long-chain-fatty-acid--CoA ligase 5	Acsl5	76.1575	136.713	5.42	2	3	3
Q9CR68	Cytochrome b-c1 complex subunit Rieske, mitochondrial	Uqcrfs1	29.3492	136.456	10.95	3	3	3
Q8BW75	Amine oxidase [flavin-containing] B	Maob	58.5204	136.454	10.38	3	3	3
P84099	60S ribosomal protein L19	Rpl19	23.4512	136.409	13.27	2	2	2
Q791V5	Mitochondrial carrier homolog 2	Mtch2	33.477	135.007	20.46	5	5	5
P25444	40S ribosomal protein S2	Rps2	31.2117	133.266	10.58	3	3	3
Q91VS7	Microsomal glutathione S-transferase 1	Mgst1	17.5401	133.117	26.45	3	3	3
P29341	Polyadenylate-binding protein 1	Pabpc1	70.6259	132.122	4.56	3	3	3
Q6PB66	Leucine-rich PPR motif-containing protein, mitochondrial	Lrpprc	156.516	131.267	2.3	3	3	3
P17225	Polypyrimidine tract-binding protein 1	Ptbp1	56.443	130.986	9.3	3	3	3
P61979	Heterogeneous nuclear ribonucleoprotein K	Hnrnpk	50.9444	128.859	6.26	2	2	2
Q9R092	17-beta-hydroxysteroid dehydrogenase type 6	Hsd17b6	36.0796	126.302	10.09	1	3	3
P14131	40S ribosomal protein S16	Rps16	16.435	125.632	19.18	3	3	3
Q60936	Atypical kinase COQ8A, mitochondrial	Coq8a	71.6974	125.6	4.03	2	2	2
P28271	Cytoplasmic aconitate hydratase	Aco1	98.0635	125.565	5.4	4	4	4
Q68FD5	Clathrin heavy chain 1	Cltc	191.435	125.263	3.1	4	4	4
P42932	T-complex protein 1 subunit theta	Cct8	59.5175	124.28	3.83	2	2	2
P62196	26S proteasome regulatory subunit 8	Psmc5	45.5971	123.32	3.2	1	1	1
P68040	Receptor of activated protein C kinase 1	Rack1	35.0546	122.954	9.78	3	3	3
Q61694	3 beta-hydroxysteroid dehydrogenase type 5	Hsd3b5	41.8659	122.66	3.22	1	1	2
Q9Z2K1	Keratin, type I cytoskeletal 16	Krt16	51.5743	121.169	5.76	1	3	3
P62264	40S ribosomal protein S14	Rps14	16.2625	120.255	15.89	2	2	2
Q9CZ13	Cytochrome b-c1 complex subunit 1, mitochondrial	Uqcrc1	52.8185	119.484	3.96	3	3	3
P62301	40S ribosomal protein S13	Rps13	17.2117	119.427	17.22	3	3	3
P51658	Estradiol 17-beta-dehydrogenase 2	Hsd17b2	41.8087	119.296	8.92	3	3	3
P56657	Cytochrome P450 2C40	Cyp2c40	55.7273	118.535	6.31	3	3	3
P60843	Eukaryotic initiation factor 4A-I	Eif4a1	46.1246	118.057	8.62	3	3	3
Q91WL5	Cytochrome P450 4A12A	Cyp4a12a	58.3123	117.825	5.12	3	3	3
Q91WD5	NADH dehydrogenase [ubiquinone] iron-sulfur protein 2, mitochondrial	Ndufs2	52.5917	114.958	3.67	2	2	3
P62702	40S ribosomal protein S4, X isoform	Rps4x	29.5791	113.858	12.55	3	3	3
O54749	Cytochrome P450 2J5	Cyp2j5	57.747	112.748	2.59	1	1	2
P11352	Glutathione peroxidase 1	Gpx1	22.3162	111.718	12.44	2	2	2
Q91X77	Cytochrome P450 2C50	Cyp2c50	55.7288	109.076	5.71	2	3	3
Q99L04	Dehydrogenase/reductase SDR family member 1	Dhrs1	33.9834	108.888	8.31	3	3	3
P62751	60S ribosomal protein L23a	Rpl23a	17.6841	107.746	20.51	3	3	3
Q80XL6	Acyl-CoA dehydrogenase family member 11	Acad11	87.3107	105.897	3.59	3	3	3
Q9WV68	Peroxisomal 2,4-dienoyl-CoA reductase	Decr2	31.2803	105.604	10.27	2	2	2
Q6NZJ6	Eukaryotic translation initiation factor 4 gamma 1	Eif4g1	175.967	105.176	2.5	3	3	3
Q06185	ATP synthase subunit e, mitochondrial	Atp5me	8.23047	104.891	42.25	3	3	3
P14685	26S proteasome non-ATPase regulatory subunit 3	Psmd3	60.6803	104.764	4.72	2	2	2
Q99LB7	Sarcosine dehydrogenase, mitochondrial	Sardh	101.618	103.959	3.59	3	3	3
P35980	60S ribosomal protein L18	Rpl18	21.6312	103.78	6.91	1	1	1
Q99LC3	NADH dehydrogenase [ubiquinone] 1 alpha subcomplex subunit 10, mitochondrial	Ndufa10	40.5777	102.864	10.14	2	2	2
Q9D8N0	Elongation factor 1-gamma	Eef1g	50.0292	101.09	8.7	3	3	3
Q922B2	Aspartate--tRNA ligase, cytoplasmic	Dars	57.1112	100.242	3.99	2	2	2
Q8BP47	Asparagine--tRNA ligase, cytoplasmic	Nars	64.238	100.002	3.58	2	2	2
Q8VEM8	Phosphate carrier protein, mitochondrial	Slc25a3	39.6065	99.9528	9.8	3	3	3
Q8JZU2	Tricarboxylate transport protein, mitochondrial	Slc25a1	33.9099	99.755	10.29	3	3	3
Q99JR1	Sideroflexin-1	Sfxn1	35.6263	98.418	6.21	2	2	2
P55096	ATP-binding cassette sub-family D member 3	Abcd3	75.4263	98.251	5.92	3	3	3
Q91WN4	Kynurenine 3-monooxygenase	Kmo	54.4957	97.812	7.72	3	3	3
Q8R164	Valacyclovir hydrolase	Bphl	32.8301	97.5226	7.9	2	2	3
Q9DCY0	Glycine N-acyltransferase-like protein Keg1	Keg1	33.7011	96.5141	7.46	2	2	2
O88986	2-amino-3-ketobutyrate coenzyme A ligase, mitochondrial	Gcat	44.9019	95.18	5.05	1	1	1
O55143	Sarcoplasmic/endoplasmic reticulum calcium ATPase 2	Atp2a2	114.784	95.1771	2.68	2	2	2
P62960	Nuclease-sensitive element-binding protein 1	Ybx1	35.7086	93.69	5.28	1	1	1
Q8CC88	von Willebrand factor A domain-containing protein 8	Vwa8	213.287	92.2954	1.15	2	2	2
Q9CQ62	2,4-dienoyl-CoA reductase, mitochondrial	Decr1	36.1907	91.9122	9.25	2	2	2
P26150	3 beta-hydroxysteroid dehydrogenase/Delta 5--&gt;4-isomerase type 3	Hsd3b3	42.0047	91.799	6.43	2	2	2
P52196	Thiosulfate sulfurtransferase	Tst	33.4448	89.45	6.4	1	1	1
P51174	Long-chain specific acyl-CoA dehydrogenase, mitochondrial	Acadl	47.8775	89.285	5.12	2	2	2
Q9CZS1	Aldehyde dehydrogenase X, mitochondrial	Aldh1b1	57.5165	88.4346	5.2	2	2	2
P63325	40S ribosomal protein S10	Rps10	18.9038	88.2547	14.55	2	2	2
Q9D6M3	Mitochondrial glutamate carrier 1	Slc25a22	34.6482	88.25	4.64	1	1	1
P62270	40S ribosomal protein S18	Rps18	17.7079	87.9114	12.5	2	2	2
P57776	Elongation factor 1-delta	Eef1d	31.2739	87.7608	8.54	2	2	2
O88587	Catechol O-methyltransferase	Comt	29.4673	87.3617	13.96	2	2	2
Q9CQN1	Heat shock protein 75 kDa, mitochondrial	Trap1	80.1585	87.0719	3.4	1	2	2
P19253	60S ribosomal protein L13a	Rpl13a	23.4493	86.1676	11.33	3	3	3
Q9JLJ2	4-trimethylaminobutyraldehyde dehydrogenase	Aldh9a1	53.4801	85.2202	4.45	2	2	2
Q8VE09	Tetratricopeptide repeat protein 39C	Ttc39c	65.4032	84.9365	4.31	2	2	2
P0CG49	Polyubiquitin-B	Ubb	34.3475	83.5323	32.79	2	2	2
Q9D819	Inorganic pyrophosphatase	Ppa1	32.6462	83.3964	8.3	2	2	2
P35979	60S ribosomal protein L12	Rpl12	17.7935	83.2221	14.55	2	2	2
P62717	60S ribosomal protein L18a	Rpl18a	20.7189	83.0212	13.07	2	2	2
P50172	Corticosteroid 11-beta-dehydrogenase isozyme 1	Hsd11b1	32.3427	82.6691	7.19	2	2	2
Q8VDM4	26S proteasome non-ATPase regulatory subunit 2	Psmd2	100.139	82.65	1.32	1	1	1
Q9CZN7	Serine hydroxymethyltransferase, mitochondrial	Shmt2	55.7236	82.489	3.97	2	2	2
Q8K2B3	Succinate dehydrogenase [ubiquinone] flavoprotein subunit, mitochondrial	Sdha	72.5392	82.0039	3.77	2	2	2
P62918	60S ribosomal protein L8	Rpl8	28.0073	81.9547	6.23	1	1	2
Q8R081	Heterogeneous nuclear ribonucleoprotein L	Hnrnpl	63.9233	81.84	1.71	1	1	1
Q8CGC7	Bifunctional glutamate/proline--tRNA ligase	Eprs	169.972	81.03	1.19	1	1	1
Q9DCD0	6-phosphogluconate dehydrogenase, decarboxylating	Pgd	53.2131	80.04	3.52	1	1	1
P27659	60S ribosomal protein L3	Rpl3	46.0808	77.71	2.98	1	1	1
P08113	Endoplasmin	Hsp90b1	92.4183	77.5066	3.37	2	2	2
Q60668	Heterogeneous nuclear ribonucleoprotein D0	Hnrnpd	38.3303	77.228	6.76	2	2	2
Q91XE0	Glycine N-acyltransferase	Glyat	34.076	77.0015	10.81	3	3	3
P53395	Lipoamide acyltransferase component of branched-chain alpha-keto acid dehydrogenase complex, mitochondrial	Dbt	53.2129	76.94	3.53	1	1	2
Q9D8E6	60S ribosomal protein L4	Rpl4	47.124	76.748	5.01	3	3	3
Q91XE8	Transmembrane protein 205	Tmem205	21.1663	76.7	8.99	1	1	1
Q99PL5	Ribosome-binding protein 1	Rrbp1	172.776	76.7	0.75	1	1	1
P61358	60S ribosomal protein L27	Rpl27	15.7877	76.1212	12.5	2	2	2
P62889	60S ribosomal protein L30	Rpl30	12.7757	76.0593	24.35	2	2	2
P50136	2-oxoisovalerate dehydrogenase subunit alpha, mitochondrial	Bckdha	50.3391	75.3119	5.43	2	2	2
O88569	Heterogeneous nuclear ribonucleoproteins A2/B1	Hnrnpa2b1	37.3797	75.31	2.83	1	1	1
Q91W64	Cytochrome P450 2C70	Cyp2c70	55.9838	75.3025	4.91	2	2	2
P28474	Alcohol dehydrogenase class-3	Adh5	39.5221	73.0301	5.61	1	2	3
Q9CQQ7	ATP synthase F(0) complex subunit B1, mitochondrial	Atp5f1	28.9304	70.8847	7.42	2	2	2
O54734	Dolichyl-diphosphooligosaccharide--protein glycosyltransferase 48 kDa subunit	Ddost	48.997	70.3019	4.54	2	2	2
P52840	Sulfotransferase 1A1	Sult1a1	33.9522	70.2868	11.34	2	2	2
P13707	Glycerol-3-phosphate dehydrogenase [NAD(+)], cytoplasmic	Gpd1	37.5484	70.1173	4.87	2	2	2
Q3TLP5	Enoyl-CoA hydratase domain-containing protein 2, mitochondrial	Echdc2	31.8317	69.68	5.74	1	1	1
P14148	60S ribosomal protein L7	Rpl7	31.3998	69.5725	7.04	2	2	2
Q922Q8	Leucine-rich repeat-containing protein 59	Lrrc59	34.8558	69.1262	8.14	2	2	2
Q64282	Interferon-induced protein with tetratricopeptide repeats 1	Ifit1	53.7034	68.048	5.18	2	2	2
Q8VBT2	L-serine dehydratase/L-threonine deaminase	Sds	34.5712	67.59	3.98	1	1	1
Q9CW42	Mitochondrial amidoxime-reducing component 1	Marc1	37.9546	67.41	5	1	1	1
P19096	Fatty acid synthase	Fasn	272.257	67.1298	0.88	2	2	2
P51660	Peroxisomal multifunctional enzyme type 2	Hsd17b4	79.432	67.07	1.63	1	1	1
Q8C0C7	Phenylalanine--tRNA ligase alpha subunit	Farsa	57.5628	66.859	4.33	2	2	2
Q8VCH0	3-ketoacyl-CoA thiolase B, peroxisomal	Acaa1b	43.9678	66.81	3.07	1	1	1
Q61656	Probable ATP-dependent RNA helicase DDX5	Ddx5	69.2468	66.657	3.09	2	2	2
Q922Q1	Mitochondrial amidoxime reducing component 2	Marc2	38.1696	66.5147	4.44	2	2	2
Q9JHI5	Isovaleryl-CoA dehydrogenase, mitochondrial	Ivd	46.2959	66.28	2.59	1	1	1
Q9WU79	Proline dehydrogenase 1, mitochondrial	Prodh	67.9925	66.15	2	1	1	1
Q8R1I1	Cytochrome b-c1 complex subunit 9	Uqcr10	7.44087	66.1337	37.5	2	2	2
Q9D0E1	Heterogeneous nuclear ribonucleoprotein M	Hnrnpm	77.5974	65.6313	3.57	2	2	2
Q9DCT2	NADH dehydrogenase [ubiquinone] iron-sulfur protein 3, mitochondrial	Ndufs3	30.1305	65.6138	9.89	2	2	2
Q9QZ85	Interferon-inducible GTPase 1	Iigp1	47.5415	65.54	2.91	1	1	1
Q62095	ATP-dependent RNA helicase DDX3Y	Ddx3y	73.3822	65.16	1.82	1	1	1
Q9D1R9	60S ribosomal protein L34	Rpl34	13.2844	65.1	7.69	1	1	1
Q9D0R2	Threonine--tRNA ligase, cytoplasmic	Tars	83.3029	64.83	1.39	1	1	1
Q9ERS2	NADH dehydrogenase [ubiquinone] 1 alpha subcomplex subunit 13	Ndufa13	16.8486	64.16	6.25	1	1	1
Q6A0A9	Constitutive coactivator of PPAR-gamma-like protein 1	FAM120A	121.569	63.81	1.53	1	1	1
P62281	40S ribosomal protein S11	Rps11	18.419	62.5456	10.13	2	2	2
Q9CQS8	Protein transport protein Sec61 subunit beta	Sec61b	9.9521	62.51	15.63	1	1	1
Q91VI7	Ribonuclease inhibitor	Rnh1	49.7841	62.48	3.29	1	1	1
P62082	40S ribosomal protein S7	Rps7	22.1133	62.1734	17.53	2	2	2
P34927	Asialoglycoprotein receptor 1	Asgr1	32.5709	61.52	3.87	1	1	1
Q9DCX2	ATP synthase subunit d, mitochondrial	Atp5h	18.7376	61.32	5.59	1	1	1
P56135	ATP synthase subunit f, mitochondrial	Atp5j2	10.3374	61.26	13.64	1	1	1
Q9R0H0	Peroxisomal acyl-coenzyme A oxidase 1	Acox1	74.6013	60.73	2.27	1	1	1
P62843	40S ribosomal protein S15	Rps15	17.0292	60.16	6.9	1	1	1
P51410	60S ribosomal protein L9	Rpl9	21.8678	59.36	6.25	1	1	1
P97742	Carnitine O-palmitoyltransferase 1, liver isoform	Cpt1a	88.1947	59.3315	3.23	2	2	2
P67984	60S ribosomal protein L22	Rpl22	14.7498	59.27	8.59	1	1	1
P50171	Estradiol 17-beta-dehydrogenase 8	Hsd17b8	26.5716	57.83	5.79	1	1	1
P62192	26S proteasome regulatory subunit 4	Psmc1	49.1537	57.7	2.73	1	1	1
Q9DC70	NADH dehydrogenase [ubiquinone] iron-sulfur protein 7, mitochondrial	Ndufs7	24.6668	56.98	4.02	1	1	1
P97379	Ras GTPase-activating protein-binding protein 2	G3bp2	54.0548	56.87	2.7	1	1	1
Q91X44	Glucokinase regulatory protein	Gckr	64.6385	56.26	1.87	1	1	1
P62900	60S ribosomal protein L31	Rpl31	14.4539	56.1	11.2	1	1	1
Q9CZM2	60S ribosomal protein L15	Rpl15	24.1311	56.1	4.41	1	1	1
Q9CZB0	Succinate dehydrogenase cytochrome b560 subunit, mitochondrial	Sdhc	18.3699	55.78	7.69	1	1	1
Q9Z1Q9	Valine--tRNA ligase	Vars	140.127	55.7	0.79	1	1	1
P11983	T-complex protein 1 subunit alpha	Tcp1	60.4107	54.94	2.16	1	1	1
Q64G17	Putative acidic leucine-rich nuclear phosphoprotein 32 family member C	Anp32c	14.0574	54.81	6.5	1	1	1
P53026	60S ribosomal protein L10a	Rpl10a	24.9006	54.53	3.69	1	1	1
P62852	40S ribosomal protein S25	Rps25	13.7337	54.1	8	1	1	1
Q9JKV1	Proteasomal ubiquitin receptor ADRM1	Adrm1	42.0337	53.84	3.93	1	1	1
Q9QXD1	Peroxisomal acyl-coenzyme A oxidase 2	Acox2	76.814	53.7	1.76	1	1	1
Q9CPR4	60S ribosomal protein L17	Rpl17	21.4094	53.5	5.43	1	1	1
Q9D023	Mitochondrial pyruvate carrier 2	Mpc2	14.2766	53.34	5.51	1	1	1
Q8QZT1	Acetyl-CoA acetyltransferase, mitochondrial	Acat1	44.7873	53.01	3.07	1	1	1
Q91WJ8	Far upstream element-binding protein 1	Fubp1	68.497	52.73	1.23	1	1	1
Q8JZZ0	UDP-glucuronosyltransferase 3A2	Ugt3a2	59.6341	51.71	1.72	1	1	1
P62806	Histone H4	Hist1h4a	11.3604	51.24	7.77	1	1	1
P62849	40S ribosomal protein S24	Rps24	15.4134	50.16	9.02	1	1	1
Q8BGH2	Sorting and assembly machinery component 50 homolog	Samm50	51.8313	50.05	2.13	1	1	1
Q9CYR6	Phosphoacetylglucosamine mutase	Pgm3	59.4153	49.81	2.4	1	1	1
P62267	40S ribosomal protein S23	Rps23	15.7977	49.63	7.69	1	1	1
O70503	Very-long-chain 3-oxoacyl-CoA reductase	Hsd17b12	34.7194	49.48	5.13	1	1	1
Q8CHQ9	N-acetyltransferase family 8 member 2	Nat8f2	26.4069	49.01	3.36	1	1	1
P61027	Ras-related protein Rab-10	Rab10	22.5266	48.93	5.5	1	1	1
Q9DD20	Methyltransferase-like protein 7B	Mettl7b	28.0305	48.69	2.87	1	1	1
Q8BP67	60S ribosomal protein L24	Rpl24	17.7679	48.39	8.28	1	1	1
P47915	60S ribosomal protein L29	Rpl29	17.5759	48.22	6.88	1	1	1
Q9CQR4	Acyl-coenzyme A thioesterase 13	Acot13	15.1729	48.12	7.14	1	1	1
Q07133	Histone H1t	Hist1h1t	21.5272	48.07	5.29	1	1	1
P80315	T-complex protein 1 subunit delta	Cct4	58.0297	48	2.41	1	1	1
Q9CXW4	60S ribosomal protein L11	Rpl11	20.2396	47.78	7.87	1	1	1
Q9QZM9	F-box only protein 16	Fbxo16	38.9624	47.69	2.4	1	1	1
P17932	Putative 60S ribosomal protein L32'	Rpl32-ps	16.0009	47.27	5.19	1	1	1
Q9CQU3	Protein RER1	Rer1	22.9729	46.9	6.63	1	1	1
P63030	Mitochondrial pyruvate carrier 1	Mpc1	12.4463	46.84	8.26	1	1	1
P62827	GTP-binding nuclear protein Ran	Ran	24.4076	46.63	5.09	1	1	1
P17563	Methanethiol oxidase	Selenbp1	52.4804	45.1	2.33	1	1	1
Q91WS4	S-methylmethionine--homocysteine S-methyltransferase BHMT2	Bhmt2	39.846	44.81	2.75	1	1	1
Q9D051	Pyruvate dehydrogenase E1 component subunit beta, mitochondrial	Pdhb	38.912	44.45	3.06	1	1	1
Q9CR57	60S ribosomal protein L14	Rpl14	23.5492	44.36	5.99	1	1	1
Q8QZR5	Alanine aminotransferase 1	Gpt	55.107	44.13	2.02	1	1	1
Q9DCM2	Glutathione S-transferase kappa 1	Gstk1	25.6873	43.81	4.42	1	1	1
Q9CPQ1	Cytochrome c oxidase subunit 6C	Cox6c	8.46351	43.48	9.21	1	1	1
Q62425	Cytochrome c oxidase subunit NDUFA4	Ndufa4	9.32087	43.34	12.2	1	1	1
Q9DCJ5	NADH dehydrogenase [ubiquinone] 1 alpha subcomplex subunit 8	Ndufa8	19.9791	43.14	7.56	1	1	1
P35564	Calnexin	Canx	67.2357	43.02	2.71	1	1	1
Q9EQ06	Estradiol 17-beta-dehydrogenase 11	Hsd17b11	32.8597	43.02	6.04	1	1	1
P61255	60S ribosomal protein L26	Rpl26	17.2475	42.95	4.14	1	1	1
P80317	T-complex protein 1 subunit zeta	Cct6a	57.9677	42.69	1.51	1	1	1
P70372	ELAV-like protein 1	Elavl1	36.1461	42.38	3.99	1	1	1
P86048	60S ribosomal protein L10-like	Rpl10l	24.5419	42.18	2.8	1	1	1
Q9R112	Sulfide:quinone oxidoreductase, mitochondrial	Sqor	50.2499	41.96	2.22	1	1	1
Q571I9	Aldehyde dehydrogenase family 16 member A1	Aldh16a1	84.7026	41.84	1.37	1	1	1
P48758	Carbonyl reductase [NADPH] 1	Cbr1	30.622	41.49	3.25	1	1	1
Q80UM7	Mannosyl-oligosaccharide glucosidase	Mogs	91.7744	41.23	2.16	1	1	1
P62855	40S ribosomal protein S26	Rps26	13.0071	41.07	7.83	1	1	1
P14115	60S ribosomal protein L27a	Rpl27a	16.595	41.01	7.43	1	1	1
Q8VEK3	Heterogeneous nuclear ribonucleoprotein U	Hnrnpu	87.8627	40.89	0.88	1	1	1
Q9CQZ5	NADH dehydrogenase [ubiquinone] 1 alpha subcomplex subunit 6	Ndufa6	15.273	40.29	6.11	1	1	1
P35700	Peroxiredoxin-1	Prdx1	22.1624	39.88	5.03	1	1	1
Q91Y97	Fructose-bisphosphate aldolase B	Aldob	39.4821	39.88	3.57	1	1	1
Q64516	Glycerol kinase	Gk	61.188	38.71	1.61	1	1	1
P0C0S6	Histone H2A.Z	H2afz	13.5446	38.15	5.47	1	1	1
Q9CPP6	NADH dehydrogenase [ubiquinone] 1 alpha subcomplex subunit 5	Ndufa5	13.3512	37.33	7.76	1	1	1
P23116	Eukaryotic translation initiation factor 3 subunit A	Eif3a	161.838	37.18	0.97	1	1	1
P32020	Non-specific lipid-transfer protein	Scp2	59.0878	37.1	1.46	1	1	1
P14211	Calreticulin	Calr	47.9649	36.82	2.88	1	1	1
Q9DBL7	Bifunctional coenzyme A synthase	Coasy	61.9846	36.58	1.78	1	1	1
P01942	Hemoglobin subunit alpha	Hba	15.0758	35.47	8.45	1	1	1
Q8VC12	Urocanate hydratase	Uroc1	74.5426	35.18	1.18	1	1	1
P35576	Glucose-6-phosphatase	G6pc	40.4463	34.99	1.96	1	1	1
P10853	Histone H2B type 1-F/J/L	Hist1h2bf	13.9276	34.67	7.14	1	1	1
O55142	60S ribosomal protein L35a	Rpl35a	12.5457	34.04	8.18	1	1	1
P50285	Dimethylaniline monooxygenase [N-oxide-forming] 1	Fmo1	59.876	31.5	2.63	1	1	1
Q9WVD5	Mitochondrial ornithine transporter 1	Slc25a15	32.8017	30.68	2.33	1	1	1
Q9WU19	Hydroxyacid oxidase 1	Hao1	40.9753	29.25	2.43	1	1	1

## Sheet: blank_MS
Accession	Protein names	Gene names	MW [kDa]	Protein score	Sequence coverage (%)	# Unique Peptides	# Peptides	# PSMs
Q8C196	Carbamoyl-phosphate synthase [ammonia], mitochondrial	Cps1	164.514	1296.84	25.07	31	31	35
Q03265	ATP synthase subunit alpha, mitochondrial	Atp5f1a	59.7156	561.239	29.66	16	16	16
P50446	Keratin, type II cytoskeletal 6A	Krt6a	59.2986	543.667	18.44	5	13	17
Q922U2	Keratin, type II cytoskeletal 5	Krt5	61.7286	496.766	13.1	2	11	15
Q99LF4	tRNA-splicing ligase RtcB homolog	Rtcb	55.2139	461.713	20.4	10	10	14
P56480	ATP synthase subunit beta, mitochondrial	Atp5f1b	56.2655	400.213	26.47	11	11	12
Q61781	Keratin, type I cytoskeletal 14	Krt14	52.8339	366.002	19.42	4	9	12
Q6IFX2	Keratin, type I cytoskeletal 42	Krt42	50.1019	317.048	17.48	3	7	11
P04104	Keratin, type II cytoskeletal 1	Krt1	65.5653	312.659	6.44	2	6	10
Q99K48	Non-POU domain-containing octamer-binding protein	Nono	54.5064	301.959	17.76	7	7	9
Q3TTY5	Keratin, type II cytoskeletal 2 epidermal	Krt2	70.8798	279.922	6.36	3	8	11
P11679	Keratin, type II cytoskeletal 8	Krt8	54.5315	269.273	6.12	1	6	9
Q8VED5	Keratin, type II cytoskeletal 79	Krt79	57.5168	258.113	5.84	1	6	9
Q9Z2K1	Keratin, type I cytoskeletal 16	Krt16	51.5743	255.648	15.78	3	6	7
Q8BWT1	3-ketoacyl-CoA thiolase, mitochondrial	Acaa2	41.8034	235.222	24.94	7	7	7
P19001	Keratin, type I cytoskeletal 19	Krt19	44.5147	230.018	8.44	3	5	7
P60710	Actin, cytoplasmic 1	Actb	41.7097	226.074	21.33	7	7	7
P53395	Lipoamide acyltransferase component of branched-chain alpha-keto acid dehydrogenase complex, mitochondrial	Dbt	53.2129	189.329	12.66	5	5	6
P10126	Elongation factor 1-alpha 1	Eef1a1	50.0821	186.997	8.44	4	4	5
P02535	Keratin, type I cytoskeletal 10	Krt10	57.7351	178.523	6.84	3	4	4
P29341	Polyadenylate-binding protein 1	Pabpc1	70.6259	178.5	9.28	6	6	6
Q3TJZ6	Protein FAM98A	Fam98a	55.0212	159.513	5.63	2	2	2
P16460	Argininosuccinate synthase	Ass1	46.555	149.05	11.41	6	6	6
Q6ZWN5	40S ribosomal protein S9	Rps9	22.5776	148.912	20.62	5	5	5
P54869	Hydroxymethylglutaryl-CoA synthase, mitochondrial	Hmgcs2	56.7865	141.212	7.09	4	4	4
Q9JKB3	Y-box-binding protein 3	Ybx3	38.7903	131.645	9.97	1	2	2
Q99JY0	Trifunctional enzyme subunit beta, mitochondrial	Hadhb	51.3534	126.033	6.53	3	3	3
P62960	Nuclease-sensitive element-binding protein 1	Ybx1	35.7086	122.766	9.94	1	2	2
Q9CY58	Plasminogen activator inhibitor 1 RNA-binding protein	Serbp1	44.6873	116.125	7.13	2	2	2
P97351	40S ribosomal protein S3a	Rps3a	29.8657	113.731	14.02	3	3	4
P16858	Glyceraldehyde-3-phosphate dehydrogenase	Gapdh	35.7872	113.217	11.11	3	3	3
P17156	Heat shock-related 70 kDa protein 2	Hspa2	69.5987	108.287	4.11	1	2	2
P62908	40S ribosomal protein S3	Rps3	26.6574	103.883	12.35	3	3	3
P62806	Histone H4	Hist1h4a	11.3604	100.426	17.48	2	2	2
Q9DCW4	Electron transfer flavoprotein subunit beta	Etfb	27.606	99.629	7.84	2	2	2
P00329	Alcohol dehydrogenase 1	Adh1	39.7456	99.5113	6.4	3	3	3
Q05920	Pyruvate carboxylase, mitochondrial	Pc	129.602	98.3366	4.07	4	4	4
O35129	Prohibitin-2	Phb2	33.2759	97.7934	10.37	3	3	3
P67778	Prohibitin	Phb	29.8019	97.2564	7.72	2	2	2
Q9DB20	ATP synthase subunit O, mitochondrial	Atp5o	23.3487	91.2726	11.74	2	2	2
P61979	Heterogeneous nuclear ribonucleoprotein K	Hnrnpk	50.9444	89.8701	5.83	2	2	2
Q61656	Probable ATP-dependent RNA helicase DDX5	Ddx5	69.2468	89.5992	4.72	2	2	2
P62702	40S ribosomal protein S4, X isoform	Rps4x	29.5791	88.6225	6.46	2	2	2
P26443	Glutamate dehydrogenase 1, mitochondrial	Glud1	61.2982	88.5872	4.84	2	2	2
P62751	60S ribosomal protein L23a	Rpl23a	17.6841	87.8945	15.38	2	2	2
P62264	40S ribosomal protein S14	Rps14	16.2625	87.5949	15.89	2	2	2
Q9CZX8	40S ribosomal protein S19	Rps19	16.0756	87.4972	19.31	3	3	3
Q9DB77	Cytochrome b-c1 complex subunit 2, mitochondrial	Uqcrc2	48.205	86.6385	6.62	2	2	2
P97855	Ras GTPase-activating protein-binding protein 1	G3bp1	51.7969	84.6818	5.81	3	3	3
P51660	Peroxisomal multifunctional enzyme type 2	Hsd17b4	79.432	81.4022	3.13	2	2	2
P25444	40S ribosomal protein S2	Rps2	31.2117	80.9287	6.83	2	2	2
P17717	UDP-glucuronosyltransferase 2B17	Ugt2b17	60.8161	80.8948	3.58	2	2	2
P56959	RNA-binding protein FUS	Fus	52.6415	79.3196	6.95	2	2	2
P20029	Endoplasmic reticulum chaperone BiP	Hspa5	72.3775	78.1065	5.04	1	2	2
Q62452	UDP-glucuronosyltransferase 1-9	Ugt1a9	59.9687	77.58	1.52	1	1	1
P14131	40S ribosomal protein S16	Rps16	16.435	76.8671	14.38	2	2	2
P61358	60S ribosomal protein L27	Rpl27	15.7877	75.3796	12.5	2	2	2
P62754	40S ribosomal protein S6	Rps6	28.663	74.6	4.82	1	1	1
P24456	Cytochrome P450 2D10	Cyp2d10	57.1965	74.1327	3.57	2	2	2
P12970	60S ribosomal protein L7a	Rpl7a	29.958	73.8541	9.02	2	2	2
P62852	40S ribosomal protein S25	Rps25	13.7337	71.7964	15.2	2	2	2
P62900	60S ribosomal protein L31	Rpl31	14.4539	70.8198	18.4	2	2	2
Q64374	Regucalcin	Rgn	33.3855	69.51	4.35	1	1	1
P14148	60S ribosomal protein L7	Rpl7	31.3998	69.3	4.07	1	1	1
P62242	40S ribosomal protein S8	Rps8	24.1902	68.931	12.5	2	2	2
Q05421	Cytochrome P450 2E1	Cyp2e1	56.7686	68.17	3.04	1	1	1
P51881	ADP/ATP translocase 2	Slc25a5	32.9102	67.9499	8.39	2	2	2
P33267	Cytochrome P450 2F2	Cyp2f2	55.913	66.2846	3.46	2	2	2
P20152	Vimentin	Vim	53.6551	60.39	2.15	1	1	1
Q8BMS1	Trifunctional enzyme subunit alpha, mitochondrial	Hadha	82.6175	59.24	2.23	1	1	1
Q9CQ62	2,4-dienoyl-CoA reductase, mitochondrial	Decr1	36.1907	59.04	6.57	1	1	1
P35922	Synaptic functional regulator FMR1	Fmr1	68.9469	58.43	1.3	1	1	1
P47963	60S ribosomal protein L13	Rpl13	24.2905	57.6454	7.58	2	2	2
P00342	L-lactate dehydrogenase C chain	Ldhc	35.8891	57.57	2.71	1	1	1
Q9CPR4	60S ribosomal protein L17	Rpl17	21.4094	56.2	5.43	1	1	1
P56135	ATP synthase subunit f, mitochondrial	Atp5j2	10.3374	56.14	13.64	1	1	1
P00405	Cytochrome c oxidase subunit 2	Mtco2	25.959	55.81	4.41	1	1	1
Q9Z0X1	Apoptosis-inducing factor 1, mitochondrial	Aifm1	66.7238	55	1.8	1	1	1
Q91VR2	ATP synthase subunit gamma, mitochondrial	Atp5f1c	32.8651	54.58	4.03	1	1	1
Q9CXW4	60S ribosomal protein L11	Rpl11	20.2396	54.02	7.87	1	1	1
P62717	60S ribosomal protein L18a	Rpl18a	20.7189	53.71	4.55	1	1	1
P10639	Thioredoxin	Txn	11.6676	52.58	8.57	1	1	1
Q9D1R9	60S ribosomal protein L34	Rpl34	13.2844	51.26	7.69	1	1	1
Q9CQQ7	ATP synthase F(0) complex subunit B1, mitochondrial	Atp5f1	28.9304	50.98	3.13	1	1	1
Q9DBM2	Peroxisomal bifunctional enzyme	Ehhadh	78.252	50.16	1.39	1	1	1
P35980	60S ribosomal protein L18	Rpl18	21.6312	48.63	4.79	1	1	1
P84099	60S ribosomal protein L19	Rpl19	23.4512	47.2	8.67	1	1	1
Q8VC30	Triokinase/FMN cyclase	Tkfc	59.6534	46.52	2.08	1	1	1
P67984	60S ribosomal protein L22	Rpl22	14.7498	46.26	8.59	1	1	1
Q07133	Histone H1t	Hist1h1t	21.5272	46.05	5.29	1	1	1
Q91YI0	Argininosuccinate lyase	Asl	51.7066	45.64	2.59	1	1	1
P62301	40S ribosomal protein S13	Rps13	17.2117	45.39	4.64	1	1	1
P62270	40S ribosomal protein S18	Rps18	17.7079	45.12	5.26	1	1	1
P35979	60S ribosomal protein L12	Rpl12	17.7935	44.77	5.45	1	1	1
P02301	Histone H3.3C	H3f3c	15.3055	44.44	5.15	1	1	1
P11352	Glutathione peroxidase 1	Gpx1	22.3162	44.39	5.47	1	1	1
P27659	60S ribosomal protein L3	Rpl3	46.0808	44.33	2.23	1	1	1
Q8JZR0	Long-chain-fatty-acid--CoA ligase 5	Acsl5	76.1575	43.64	1.32	1	1	1
Q91VS7	Microsomal glutathione S-transferase 1	Mgst1	17.5401	43.5	8.39	1	1	1
Q02257	Junction plakoglobin	Jup	81.7488	42.78	2.01	1	1	1
P05202	Aspartate aminotransferase, mitochondrial	Got2	47.3812	42.25	2.79	1	1	1
P60843	Eukaryotic initiation factor 4A-I	Eif4a1	46.1246	42.16	2.46	1	1	1
Q9QXX4	Calcium-binding mitochondrial carrier protein Aralar2	Slc25a13	74.4198	41.97	1.18	1	1	1
P62281	40S ribosomal protein S11	Rps11	18.419	41.92	5.06	1	1	1
P68373	Tubulin alpha-1C chain	Tuba1c	49.8775	41.75	2.23	1	1	1
O88844	Isocitrate dehydrogenase [NADP] cytoplasmic	Idh1	46.6445	41.43	3.14	1	1	1
Q07417	Short-chain specific acyl-CoA dehydrogenase, mitochondrial	Acads	44.8611	41.23	2.67	1	1	1
Q99MN9	Propionyl-CoA carboxylase beta chain, mitochondrial	Pccb	58.3719	41.07	1.85	1	1	1
P62245	40S ribosomal protein S15a	Rps15a	14.83	40.9	6.92	1	1	1
P42125	Enoyl-CoA delta isomerase 1, mitochondrial	Eci1	32.2298	40.43	2.77	1	1	1
P47911	60S ribosomal protein L6	Rpl6	33.4889	40.09	2.7	1	1	1
Q99LC5	Electron transfer flavoprotein subunit alpha, mitochondrial	Etfa	34.9875	39.82	4.8	1	1	1
Q9CR57	60S ribosomal protein L14	Rpl14	23.5492	39	5.99	1	1	1
P10853	Histone H2B type 1-F/J/L	Hist1h2bf	13.9276	36.94	7.14	1	1	1
E9Q3S4	Mitogen-activated protein kinase kinase kinase 19	Map3k19	146.32	36.48	0.53	1	1	1
Q9Z2I8	Succinate--CoA ligase [GDP-forming] subunit beta, mitochondrial	Suclg2	46.8107	36.09	2.31	1	1	1
E9PY46	Intraflagellar transport protein 140 homolog	Ift140	165.769	35.08	0.48	1	1	1
P14115	60S ribosomal protein L27a	Rpl27a	16.595	34.65	7.43	1	1	1
P0C0S6	Histone H2A.Z	H2afz	13.5446	34.53	5.47	1	1	1
Q99LB2	Dehydrogenase/reductase SDR family member 4	Dhrs4	29.8657	31.86	2.51	1	1	1

## Sheet: LacZ_MS
Accession	Protein names	Gene names	MW [kDa]	Protein score	Sequence coverage (%)	# Unique Peptides	# Peptides	# PSMs
Q8C196	Carbamoyl-phosphate synthase [ammonia], mitochondrial	Cps1	164.514	1247.43	26.47	33	33	36
Q03265	ATP synthase subunit alpha, mitochondrial	Atp5f1a	59.7156	468.906	22.97	12	12	12
Q922U2	Keratin, type II cytoskeletal 5	Krt5	61.7286	416.02	13.97	2	12	15
P50446	Keratin, type II cytoskeletal 6A	Krt6a	59.2986	415.32	16.27	3	12	14
P56480	ATP synthase subunit beta, mitochondrial	Atp5f1b	56.2655	366.577	21.17	9	9	10
Q3TTY5	Keratin, type II cytoskeletal 2 epidermal	Krt2	70.8798	291.278	7.07	3	8	10
P16460	Argininosuccinate synthase	Ass1	46.555	240.539	18.69	8	8	9
Q8VED5	Keratin, type II cytoskeletal 79	Krt79	57.5168	226.607	5.84	1	6	8
P11679	Keratin, type II cytoskeletal 8	Krt8	54.5315	216.775	7.35	1	7	9
P53395	Lipoamide acyltransferase component of branched-chain alpha-keto acid dehydrogenase complex, mitochondrial	Dbt	53.2129	216.434	12.66	5	5	6
P04104	Keratin, type II cytoskeletal 1	Krt1	65.5653	210.119	6.28	2	6	7
P02535	Keratin, type I cytoskeletal 10	Krt10	57.7351	193.831	6.84	3	4	4
Q9QWL7	Keratin, type I cytoskeletal 17	Krt17	48.1321	189.927	9.7	2	5	6
P10126	Elongation factor 1-alpha 1	Eef1a1	50.0821	189.858	8.23	4	4	5
P60710	Actin, cytoplasmic 1	Actb	41.7097	182.006	15.47	5	5	5
Q8BMS1	Trifunctional enzyme subunit alpha, mitochondrial	Hadha	82.6175	164.79	8.13	4	4	4
P19001	Keratin, type I cytoskeletal 19	Krt19	44.5147	159.608	7.94	1	4	5
Q05920	Pyruvate carboxylase, mitochondrial	Pc	129.602	154.136	3.23	3	3	3
Q8BWT1	3-ketoacyl-CoA thiolase, mitochondrial	Acaa2	41.8034	150.406	15.37	5	5	5
P63017	Heat shock cognate 71 kDa protein	Hspa8	70.8272	144.581	8.05	4	4	4
P62264	40S ribosomal protein S14	Rps14	16.2625	141.448	15.89	2	2	2
Q6IFX2	Keratin, type I cytoskeletal 42	Krt42	50.1019	137.094	8.19	2	4	4
Q6ZWN5	40S ribosomal protein S9	Rps9	22.5776	132.752	20.1	5	5	5
P54869	Hydroxymethylglutaryl-CoA synthase, mitochondrial	Hmgcs2	56.7865	130.608	7.09	4	4	4
P51881	ADP/ATP translocase 2	Slc25a5	32.9102	112.169	14.43	4	4	4
P00329	Alcohol dehydrogenase 1	Adh1	39.7456	106.028	10.93	4	4	4
P97351	40S ribosomal protein S3a	Rps3a	29.8657	105.916	17.05	4	4	4
P84099	60S ribosomal protein L19	Rpl19	23.4512	103.03	8.67	1	1	1
P61255	60S ribosomal protein L26	Rpl26	17.2475	101.016	21.38	4	4	4
P33267	Cytochrome P450 2F2	Cyp2f2	55.913	97.4355	4.89	3	3	3
Q91V92	ATP-citrate synthase	Acly	119.651	96.3783	2.02	2	2	2
P16858	Glyceraldehyde-3-phosphate dehydrogenase	Gapdh	35.7872	95.3465	6.61	2	2	2
P51660	Peroxisomal multifunctional enzyme type 2	Hsd17b4	79.432	92.3529	3.13	2	2	2
P62806	Histone H4	Hist1h4a	11.3604	89.1453	17.48	2	2	2
P14148	60S ribosomal protein L7	Rpl7	31.3998	88.5	4.07	1	1	1
Q91VS7	Microsomal glutathione S-transferase 1	Mgst1	17.5401	88.4391	18.71	2	2	3
P62301	40S ribosomal protein S13	Rps13	17.2117	87.2552	12.58	2	2	2
P62960	Nuclease-sensitive element-binding protein 1	Ybx1	35.7086	86.43	5.28	1	1	1
Q91YI0	Argininosuccinate lyase	Asl	51.7066	84.0831	6.9	3	3	3
Q91VR2	ATP synthase subunit gamma, mitochondrial	Atp5f1c	32.8651	84.0053	7.72	2	2	2
Q9Z2I8	Succinate--CoA ligase [GDP-forming] subunit beta, mitochondrial	Suclg2	46.8107	80.88	2.31	1	1	1
Q9DB77	Cytochrome b-c1 complex subunit 2, mitochondrial	Uqcrc2	48.205	78.8827	6.18	2	2	2
P62754	40S ribosomal protein S6	Rps6	28.663	76.49	4.82	1	1	1
Q9Z2K1	Keratin, type I cytoskeletal 16	Krt16	51.5743	75.9518	3.84	1	2	2
Q9D8E6	60S ribosomal protein L4	Rpl4	47.124	75.6754	4.3	2	2	2
P47911	60S ribosomal protein L6	Rpl6	33.4889	75.413	13.51	3	3	3
O35129	Prohibitin-2	Phb2	33.2759	75.1707	7.36	2	2	2
Q9DCW4	Electron transfer flavoprotein subunit beta	Etfb	27.606	74.4404	7.84	2	2	2
P61358	60S ribosomal protein L27	Rpl27	15.7877	74.1704	12.5	2	2	2
P62702	40S ribosomal protein S4, X isoform	Rps4x	29.5791	73.757	6.84	2	2	2
P14131	40S ribosomal protein S16	Rps16	16.435	73.5525	14.38	2	2	2
P62889	60S ribosomal protein L30	Rpl30	12.7757	72.71	10.43	1	1	1
P05202	Aspartate aminotransferase, mitochondrial	Got2	47.3812	71.99	2.79	1	1	1
P41216	Long-chain-fatty-acid--CoA ligase 1	Acsl1	77.9014	67.6689	2.58	2	2	2
P15864	Histone H1.2	Hist1h1c	21.2537	66.4236	10.85	2	2	2
Q9D1R9	60S ribosomal protein L34	Rpl34	13.2844	66.14	7.69	1	1	1
P10639	Thioredoxin	Txn	11.6676	65.49	8.57	1	1	1
P62852	40S ribosomal protein S25	Rps25	13.7337	65.1772	15.2	2	2	2
P62751	60S ribosomal protein L23a	Rpl23a	17.6841	64.14	8.33	1	1	1
Q64374	Regucalcin	Rgn	33.3855	62.37	4.35	1	1	1
P62717	60S ribosomal protein L18a	Rpl18a	20.7189	62.17	4.55	1	1	1
Q9CZX8	40S ribosomal protein S19	Rps19	16.0756	61.993	12.41	2	2	2
P68368	Tubulin alpha-4A chain	Tuba4a	49.8924	61.44	3.13	1	1	1
P11714	Cytochrome P450 2D9	Cyp2d9	56.9133	60.4272	4.17	2	2	2
Q99JY0	Trifunctional enzyme subunit beta, mitochondrial	Hadhb	51.3534	60.1	2.32	1	1	1
Q07417	Short-chain specific acyl-CoA dehydrogenase, mitochondrial	Acads	44.8611	60.07	2.67	1	1	1
P17717	UDP-glucuronosyltransferase 2B17	Ugt2b17	60.8161	59.42	1.7	1	1	1
P11499	Heat shock protein HSP 90-beta	Hsp90ab1	83.2291	59.2074	2.9	2	2	2
Q62452	UDP-glucuronosyltransferase 1-9	Ugt1a9	59.9687	58.5	1.52	1	1	1
Q9CXW4	60S ribosomal protein L11	Rpl11	20.2396	58.41	7.87	1	1	1
O88844	Isocitrate dehydrogenase [NADP] cytoplasmic	Idh1	46.6445	57.3078	3.14	1	1	2
P00342	L-lactate dehydrogenase C chain	Ldhc	35.8891	56.59	2.71	1	1	1
Q05421	Cytochrome P450 2E1	Cyp2e1	56.7686	55.87	3.04	1	1	1
Q9DB20	ATP synthase subunit O, mitochondrial	Atp5o	23.3487	55.66	6.57	1	1	1
P56135	ATP synthase subunit f, mitochondrial	Atp5j2	10.3374	55.34	13.64	1	1	1
Q9CQQ7	ATP synthase F(0) complex subunit B1, mitochondrial	Atp5f1	28.9304	51.02	3.13	1	1	1
P62267	40S ribosomal protein S23	Rps23	15.7977	50.11	7.69	1	1	1
P97872	Dimethylaniline monooxygenase [N-oxide-forming] 5	Fmo5	59.962	49.47	1.69	1	1	1
P47915	60S ribosomal protein L29	Rpl29	17.5759	48.041	13.75	2	2	2
Q9QZM9	F-box only protein 16	Fbxo16	38.9624	47.45	2.4	1	1	1
P67778	Prohibitin	Phb	29.8019	46.65	4.04	1	1	1
P02088	Hemoglobin subunit beta-1	Hbb-b1	15.8301	46.29	10.88	1	1	1
Q99L45	Eukaryotic translation initiation factor 2 subunit 2	Eif2s2	38.0682	45.59	3.02	1	1	1
P10922	Histone H1.0	H1f0	20.8482	45.49	5.15	1	1	1
P35979	60S ribosomal protein L12	Rpl12	17.7935	44.71	5.45	1	1	1
Q9CZM2	60S ribosomal protein L15	Rpl15	24.1311	43.92	3.43	1	1	1
Q99LC5	Electron transfer flavoprotein subunit alpha, mitochondrial	Etfa	34.9875	43.33	5.11	1	1	1
P67984	60S ribosomal protein L22	Rpl22	14.7498	42.91	8.59	1	1	1
P62245	40S ribosomal protein S15a	Rps15a	14.83	42.88	6.92	1	1	1
P35980	60S ribosomal protein L18	Rpl18	21.6312	42.02	4.79	1	1	1
P62900	60S ribosomal protein L31	Rpl31	14.4539	41.49	11.2	1	1	1
P14869	60S acidic ribosomal protein P0	Rplp0	34.1948	40.82	3.47	1	1	1
Q9CQ62	2,4-dienoyl-CoA reductase, mitochondrial	Decr1	36.1907	40.21	3.88	1	1	1
Q9WUM5	Succinate--CoA ligase [ADP/GDP-forming] subunit alpha, mitochondrial	Suclg1	36.132	39.44	2.6	1	1	1
E9Q3S4	Mitogen-activated protein kinase kinase kinase 19	Map3k19	146.32	38.51	0.53	1	1	1
P0C0S6	Histone H2A.Z	H2afz	13.5446	37.85	5.47	1	1	1
P10853	Histone H2B type 1-F/J/L	Hist1h2bf	13.9276	37.16	7.14	1	1	1
Q80XN0	D-beta-hydroxybutyrate dehydrogenase, mitochondrial	Bdh1	38.2744	36.69	3.21	1	1	1
Q8BVW3	Tripartite motif-containing protein 14	Trim14	49.6091	36.69	2.27	1	1	1
P62908	40S ribosomal protein S3	Rps3	26.6574	36.25	3.29	1	1	1
Q9ET01	Glycogen phosphorylase, liver form	Pygl	97.401	36.22	0.82	1	1	1
P25444	40S ribosomal protein S2	Rps2	31.2117	34.72	2.39	1	1	1

## Sheet: Snhg3 specific binding protein
Protein accession	Regulated Type	Subcellular localization	KEGG KO No.	KEGG Gene	KEGG pathway	Biological Process	Cellular Component	Molecular Function	IPR ID	Domain description	KOG category	KOG NO.	KOG description
O08601	Specific	endoplasmic reticulum	K14463	MTTP, MTP; microsomal triglyceride transfer protein large subunit	mmu04975 Fat digestion and absorption	GO:0044085 cellular component biogenesis; GO:0065008 regulation of biological quality; GO:0046486 glycerolipid metabolic process; GO:0006066 alcohol metabolic process; GO:0044699 single-organism process; GO:0009058 biosynthetic process; GO:0044255 cellular lipid metabolic process; GO:0044237 cellular metabolic process; GO:0042157 lipoprotein metabolic process; GO:0015031 protein transport; GO:005…	GO:0016323 basolateral plasma membrane; GO:0016020 membrane; GO:0098862 cluster of actin-based cell projections; GO:0005783 endoplasmic reticulum; GO:0005903 brush border; GO:0071944 cell periphery; GO:0031982 vesicle; GO:0005737 cytoplasm; GO:0032991 macromolecular complex; GO:0044424 intracellular part; GO:0098858 actin-based cell projection; GO:0005623 cell; GO:0098590 plasma membrane region; …	GO:0034185 apolipoprotein binding; GO:0046982 protein heterodimerization activity; GO:0005488 binding; GO:0046983 protein dimerization activity; GO:0008289 lipid binding; GO:0005319 lipid transporter activity; GO:0022892 substrate-specific transporter activity; GO:0005515 protein binding; GO:0005548 phospholipid transporter activity; GO:0005215 transporter activity;	IPR015816; IPR015819; IPR011030; IPR001747;	Vitellinogen, beta-sheet N-terminal; Lipid transport protein, beta-sheet shell; Vitellinogen, superhelical; Lipid transport protein, N-terminal;	IU	KOG4337	Microsomal triglyceride transfer protein
O08749	Specific	mitochondria	K00382	DLD, lpd, pdhD; dihydrolipoamide dehydrogenase [EC:1.8.1.4]	mmu00010 Glycolysis / Gluconeogenesis; mmu00020 Citrate cycle (TCA cycle); mmu00260 Glycine, serine and threonine metabolism; mmu00280 Valine, leucine and isoleucine degradation; mmu00310 Lysine degradation; mmu00380 Tryptophan metabolism; mmu00620 Pyruvate metabolism; mmu00630 Glyoxylate and dicarboxylate metabolism; mmu00640 Propanoate metabolism; mmu01100 Metabolic pathways; mmu01200 Carbon me…	GO:0009116 nucleoside metabolic process; GO:0021700 developmental maturation; GO:0065008 regulation of biological quality; GO:0051068 dihydrolipoamide metabolic process; GO:0019362 pyridine nucleotide metabolic process; GO:0022414 reproductive process; GO:0044255 cellular lipid metabolic process; GO:0044237 cellular metabolic process; GO:0044272 sulfur compound biosynthetic process; GO:0008152 me…	GO:0031410 cytoplasmic vesicle; GO:0005737 cytoplasm; GO:0031982 vesicle; GO:0044433 cytoplasmic vesicle part; GO:0032991 macromolecular complex; GO:0043159 acrosomal matrix; GO:0044424 intracellular part; GO:0005623 cell; GO:0044422 organelle part; GO:0045240 dihydrolipoyl dehydrogenase complex; GO:0031974 membrane-enclosed lumen; GO:1902494 catalytic complex; GO:0005654 nucleoplasm; GO:0070013 …	GO:0004148 dihydrolipoyl dehydrogenase activity; GO:0016651 oxidoreductase activity, acting on NAD(P)H; GO:0043544 lipoamide binding; GO:0034604 pyruvate dehydrogenase (NAD+) activity; GO:1901265 nucleoside phosphate binding; GO:0050660 flavin adenine dinucleotide binding; GO:0016903 oxidoreductase activity, acting on the aldehyde or oxo group of donors; GO:0043167 ion binding; GO:0000166 nucleot…	IPR016156; IPR004099; IPR023753;	FAD/NAD-linked reductase, dimerisation domain; Pyridine nucleotide-disulphide oxidoreductase, dimerisation domain; FAD/NAD(P)-binding domain;	C	KOG1335	Dihydrolipoamide dehydrogenase
O35423	Specific	mitochondria	K00830	AGXT; alanine-glyoxylate transaminase / serine-glyoxylate transaminase / serine-pyruvate transaminase [EC:2.6.1.44 2.6.1.45 2.6.1.51]	mmu00250 Alanine, aspartate and glutamate metabolism; mmu00260 Glycine, serine and threonine metabolism; mmu00630 Glyoxylate and dicarboxylate metabolism; mmu01100 Metabolic pathways; mmu01200 Carbon metabolism; mmu04146 Peroxisome	GO:0044700 single organism signaling; GO:0046717 acid secretion; GO:1901606 alpha-amino acid catabolic process; GO:0016053 organic acid biosynthetic process; GO:0042851 L-alanine metabolic process; GO:0007166 cell surface receptor signaling pathway; GO:0006522 alanine metabolic process; GO:0046683 response to organophosphorus; GO:0044699 single-organism process; GO:0009058 biosynthetic process; G…	GO:0005759 mitochondrial matrix; GO:0043229 intracellular organelle; GO:0044439 peroxisomal part; GO:0044429 mitochondrial part; GO:0005777 peroxisome; GO:0005737 cytoplasm; GO:0044446 intracellular organelle part; GO:0044438 microbody part; GO:0044424 intracellular part; GO:0005623 cell; GO:0005739 mitochondrion; GO:0044422 organelle part; GO:0031974 membrane-enclosed lumen; GO:0043226 organelle…	GO:0016769 transferase activity, transferring nitrogenous groups; GO:0016597 amino acid binding; GO:0005102 receptor binding; GO:0043621 protein self-association; GO:0046983 protein dimerization activity; GO:0043167 ion binding; GO:0043177 organic acid binding; GO:0004760 serine-pyruvate transaminase activity; GO:0005515 protein binding; GO:0048037 cofactor binding; GO:0030170 pyridoxal phosphate…	IPR015424; IPR000192; IPR015421; IPR015422;	Pyridoxal phosphate-dependent transferase; Aminotransferase class V domain; Pyridoxal phosphate-dependent transferase, major region, subdomain 1; Pyridoxal phosphate-dependent transferase, major region, subdomain 2;	R	KOG2862	Alanine-glyoxylate aminotransferase AGT1
O35488	Specific	endoplasmic reticulum	K08746	SLC27A2, FACVL1, FATP2; solute carrier family 27 (fatty acid transporter), member 2 [EC:6.2.1.- 6.2.1.3]	mmu03320 PPAR signaling pathway; mmu04146 Peroxisome; mmu04931 Insulin resistance	GO:0016053 organic acid biosynthetic process; GO:0044699 single-organism process; GO:0009058 biosynthetic process; GO:0044255 cellular lipid metabolic process; GO:0044237 cellular metabolic process; GO:0008610 lipid biosynthetic process; GO:0051234 establishment of localization; GO:0008152 metabolic process; GO:0015718 monocarboxylic acid transport; GO:0030258 lipid modification; GO:0032787 monoc…	GO:0016020 membrane; GO:0042175 nuclear outer membrane-endoplasmic reticulum membrane network; GO:0044421 extracellular region part; GO:0005783 endoplasmic reticulum; GO:0031090 organelle membrane; GO:0031982 vesicle; GO:0005737 cytoplasm; GO:0031224 intrinsic component of membrane; GO:0044438 microbody part; GO:0044424 intracellular part; GO:0005623 cell; GO:0044422 organelle part; GO:0005778 pe…	GO:1901265 nucleoside phosphate binding; GO:0005102 receptor binding; GO:0016874 ligase activity; GO:0005319 lipid transporter activity; GO:0022892 substrate-specific transporter activity; GO:0005515 protein binding; GO:0016877 ligase activity, forming carbon-sulfur bonds; GO:0070251 pristanate-CoA ligase activity; GO:1901363 heterocyclic compound binding; GO:0097159 organic cyclic compound bindi…	IPR025110; IPR000873;	AMP-binding enzyme C-terminal domain; AMP-dependent synthetase/ligase;	I	KOG1179	Very long-chain acyl-CoA synthetase/fatty acid transporter
O54734	Specific	endoplasmic reticulum	K12670	WBP1; oligosaccharyltransferase complex subunit beta	mmu00510 N-Glycan biosynthesis; mmu00513 Various types of N-glycan biosynthesis; mmu01100 Metabolic pathways; mmu04141 Protein processing in endoplasmic reticulum	GO:0043413 macromolecule glycosylation; GO:0045321 leukocyte activation; GO:0044267 cellular protein metabolic process; GO:0044699 single-organism process; GO:0009058 biosynthetic process; GO:0018196 peptidyl-asparagine modification; GO:0050896 response to stimulus; GO:0044237 cellular metabolic process; GO:0071704 organic substance metabolic process; GO:0042110 T cell activation; GO:0008152 meta…	GO:0016020 membrane; GO:0043229 intracellular organelle; GO:0042175 nuclear outer membrane-endoplasmic reticulum membrane network; GO:0005783 endoplasmic reticulum; GO:0044446 intracellular organelle part; GO:0005737 cytoplasm; GO:0031224 intrinsic component of membrane; GO:0032991 macromolecular complex; GO:0012505 endomembrane system; GO:0044424 intracellular part; GO:0008250 oligosaccharyltran…	GO:0004579 dolichyl-diphosphooligosaccharide-protein glycotransferase activity; GO:0016757 transferase activity, transferring glycosyl groups; GO:0016758 transferase activity, transferring hexosyl groups; GO:0003824 catalytic activity; GO:0016740 transferase activity; GO:0004576 oligosaccharyl transferase activity;			O	KOG2754	Oligosaccharyltransferase, beta subunit
O54749	Specific	endoplasmic reticulum	K07418	CYP2J; cytochrome P450 family 2 subfamily J [EC:1.14.14.1]	mmu00590 Arachidonic acid metabolism; mmu00591 Linoleic acid metabolism; mmu01100 Metabolic pathways; mmu04726 Serotonergic synapse; mmu04750 Inflammatory mediator regulation of TRP channels; mmu04913 Ovarian steroidogenesis	GO:0045777 positive regulation of blood pressure; GO:0065008 regulation of biological quality; GO:0023051 regulation of signaling; GO:0051046 regulation of secretion; GO:0044699 single-organism process; GO:0002034 regulation of blood vessel diameter by renin-angiotensin; GO:0051234 establishment of localization; GO:0097746 regulation of blood vessel diameter; GO:0008152 metabolic process; GO:0010…	GO:0043229 intracellular organelle; GO:0016020 membrane; GO:0042175 nuclear outer membrane-endoplasmic reticulum membrane network; GO:0005783 endoplasmic reticulum; GO:0031090 organelle membrane; GO:0044446 intracellular organelle part; GO:0005737 cytoplasm; GO:0012505 endomembrane system; GO:0044424 intracellular part; GO:0005623 cell; GO:0044422 organelle part; GO:0043231 intracellular membrane…	GO:0005506 iron ion binding; GO:0043167 ion binding; GO:0016705 oxidoreductase activity, acting on paired donors, with incorporation or reduction of molecular oxygen; GO:0016491 oxidoreductase activity; GO:1901363 heterocyclic compound binding; GO:0097159 organic cyclic compound binding; GO:0020037 heme binding; GO:0046914 transition metal ion binding; GO:0003824 catalytic activity; GO:0005488 bi…			Q	KOG0156	Cytochrome P450 CYP2 subfamily
O55142	Specific	cytoplasm	K02917	RP-L35Ae, RPL35A; large subunit ribosomal protein L35Ae	mmu03010 Ribosome	GO:0044085 cellular component biogenesis; GO:0022613 ribonucleoprotein complex biogenesis; GO:0006518 peptide metabolic process; GO:0006725 cellular aromatic compound metabolic process; GO:0044267 cellular protein metabolic process; GO:0009058 biosynthetic process; GO:1901566 organonitrogen compound biosynthetic process; GO:0044237 cellular metabolic process; GO:0042273 ribosomal large subunit bi…	GO:0016020 membrane; GO:0044421 extracellular region part; GO:0005737 cytoplasm; GO:0031982 vesicle; GO:0032991 macromolecular complex; GO:0044424 intracellular part; GO:0005623 cell; GO:0044422 organelle part; GO:0043228 non-membrane-bounded organelle; GO:0070062 extracellular exosome; GO:0044391 ribosomal subunit; GO:0005622 intracellular; GO:0044464 cell part; GO:1903561 extracellular vesicle;…	GO:0097159 organic cyclic compound binding; GO:1901363 heterocyclic compound binding; GO:0003723 RNA binding; GO:0005488 binding; GO:0003676 nucleic acid binding; GO:0005198 structural molecule activity; GO:0003735 structural constituent of ribosome;	IPR009000;	Translation protein, beta-barrel domain;	J	KOG0887	60S ribosomal protein L35A/L37
O55143	Specific	plasma membrane	K05853	ATP2A; Ca2+ transporting ATPase, sarcoplasmic/endoplasmic reticulum [EC:3.6.3.8]	mmu04020 Calcium signaling pathway; mmu04022 cGMP-PKG signaling pathway; mmu04024 cAMP signaling pathway; mmu04260 Cardiac muscle contraction; mmu04261 Adrenergic signaling in cardiomyocytes; mmu04919 Thyroid hormone signaling pathway; mmu04972 Pancreatic secretion; mmu05010 Alzheimer disease; mmu05410 Hypertrophic cardiomyopathy (HCM); mmu05412 Arrhythmogenic right ventricular cardiomyopathy (AR…	GO:0060627 regulation of vesicle-mediated transport; GO:0044700 single organism signaling; GO:0065008 regulation of biological quality; GO:0043500 muscle adaptation; GO:0098900 regulation of action potential; GO:0098909 regulation of cardiac muscle cell action potential involved in regulation of contraction; GO:0032879 regulation of localization; GO:0055065 metal ion homeostasis; GO:1903115 regul…	GO:0016020 membrane; GO:0042175 nuclear outer membrane-endoplasmic reticulum membrane network; GO:0005783 endoplasmic reticulum; GO:0090534 calcium ion-transporting ATPase complex; GO:0031090 organelle membrane; GO:0019898 extrinsic component of membrane; GO:0071944 cell periphery; GO:0014801 longitudinal sarcoplasmic reticulum; GO:0031982 vesicle; GO:0005737 cytoplasm; GO:0032991 macromolecular …	GO:0031775 lutropin-choriogonadotropic hormone receptor binding; GO:0042625 ATPase coupled ion transmembrane transporter activity; GO:1901265 nucleoside phosphate binding; GO:0005102 receptor binding; GO:0015399 primary active transmembrane transporter activity; GO:0022892 substrate-specific transporter activity; GO:0016817 hydrolase activity, acting on acid anhydrides; GO:0005515 protein binding…	IPR023298; IPR004014; IPR023299; IPR008250; IPR023214; IPR006068;	P-type ATPase, transmembrane domain; Cation-transporting P-type ATPase, N-terminal; P-type ATPase, cytoplasmic domain N; P-type ATPase, A domain; HAD-like domain; Cation-transporting P-type ATPase, C-terminal;	P	KOG0202	Ca2+ transporting ATPase
O70475	Specific	cytoplasm	K00012	UGDH, ugd; UDPglucose 6-dehydrogenase [EC:1.1.1.22]	mmu00040 Pentose and glucuronate interconversions; mmu00053 Ascorbate and aldarate metabolism; mmu00520 Amino sugar and nucleotide sugar metabolism; mmu01100 Metabolic pathways	GO:0009226 nucleotide-sugar biosynthetic process; GO:0044707 single-multicellular organism process; GO:0006725 cellular aromatic compound metabolic process; GO:0016053 organic acid biosynthetic process; GO:0046398 UDP-glucuronate metabolic process; GO:0044699 single-organism process; GO:0009058 biosynthetic process; GO:0044237 cellular metabolic process; GO:0071704 organic substance metabolic pro…	GO:0043229 intracellular organelle; GO:0044421 extracellular region part; GO:0044446 intracellular organelle part; GO:0031982 vesicle; GO:0031981 nuclear lumen; GO:0044424 intracellular part; GO:0005623 cell; GO:0005576 extracellular region; GO:0044422 organelle part; GO:0031974 membrane-enclosed lumen; GO:0043226 organelle; GO:0070062 extracellular exosome; GO:0043231 intracellular membrane-boun…	GO:0097159 organic cyclic compound binding; GO:1901363 heterocyclic compound binding; GO:0016614 oxidoreductase activity, acting on CH-OH group of donors; GO:0016616 oxidoreductase activity, acting on the CH-OH group of donors, NAD or NADP as acceptor; GO:1901265 nucleoside phosphate binding; GO:0003979 UDP-glucose 6-dehydrogenase activity; GO:0051287 NAD binding; GO:0003824 catalytic activity; G…	IPR001732; IPR008927; IPR014027; IPR016040; IPR014026;	UDP-glucose/GDP-mannose dehydrogenase, N-terminal; 6-phosphogluconate dehydrogenase C-terminal domain-like; UDP-glucose/GDP-mannose dehydrogenase, C-terminal; NAD(P)-binding domain; UDP-glucose/GDP-mannose dehydrogenase, dimerisation;	GT	KOG2666	UDP-glucose/GDP-mannose dehydrogenase
O70503	Specific	cytoplasm	K10251	HSD17B12, KAR, IFA38; 17beta-estradiol 17-dehydrogenase / very-long-chain 3-oxoacyl-CoA reductase [EC:1.1.1.62 1.1.1.330]	mmu00062 Fatty acid elongation; mmu00140 Steroid hormone biosynthesis; mmu01040 Biosynthesis of unsaturated fatty acids; mmu01100 Metabolic pathways; mmu01212 Fatty acid metabolism	GO:0042446 hormone biosynthetic process; GO:0016043 cellular component organization; GO:0065008 regulation of biological quality; GO:0016053 organic acid biosynthetic process; GO:0044699 single-organism process; GO:0044255 cellular lipid metabolic process; GO:0009058 biosynthetic process; GO:0006703 estrogen biosynthetic process; GO:0044237 cellular metabolic process; GO:0071704 organic substance…	GO:0043229 intracellular organelle; GO:0016020 membrane; GO:0042175 nuclear outer membrane-endoplasmic reticulum membrane network; GO:0044421 extracellular region part; GO:0005783 endoplasmic reticulum; GO:0044446 intracellular organelle part; GO:0005737 cytoplasm; GO:0031224 intrinsic component of membrane; GO:0012505 endomembrane system; GO:0044424 intracellular part; GO:0005623 cell; GO:000557…	GO:0102341 3-oxo-lignoceroyl-CoA reductase activity; GO:0001968 fibronectin binding; GO:0033764 steroid dehydrogenase activity, acting on the CH-OH group of donors, NAD or NADP as acceptor; GO:0102340 3-oxo-behenoyl-CoA reductase activity; GO:0044877 macromolecular complex binding; GO:0043167 ion binding; GO:0005515 protein binding; GO:0004303 estradiol 17-beta-dehydrogenase activity; GO:0016509 …	IPR016040;	NAD(P)-binding domain;	I	KOG1014	17 beta-hydroxysteroid dehydrogenase type 3, HSD17B3
O88451	Specific	extracellular	K11154	RDH16; retinol dehydrogenase 16 [EC:1.1.1.-]	mmu00830 Retinol metabolism; mmu01100 Metabolic pathways	GO:0006720 isoprenoid metabolic process; GO:0042445 hormone metabolic process; GO:0065008 regulation of biological quality; GO:1901615 organic hydroxy compound metabolic process; GO:0055114 oxidation-reduction process; GO:0006066 alcohol metabolic process; GO:0044281 small molecule metabolic process; GO:0044763 single-organism cellular process; GO:0044699 single-organism process; GO:0044255 cellu…	GO:0043231 intracellular membrane-bounded organelle; GO:0043226 organelle; GO:0043229 intracellular organelle; GO:0005783 endoplasmic reticulum; GO:0044464 cell part; GO:0005622 intracellular; GO:0005737 cytoplasm; GO:0012505 endomembrane system; GO:0044424 intracellular part; GO:0043227 membrane-bounded organelle; GO:0005623 cell; GO:0044444 cytoplasmic part;	GO:0016614 oxidoreductase activity, acting on CH-OH group of donors; GO:0016616 oxidoreductase activity, acting on the CH-OH group of donors, NAD or NADP as acceptor; GO:0004745 retinol dehydrogenase activity; GO:0003824 catalytic activity; GO:0016491 oxidoreductase activity;	IPR016040;	NAD(P)-binding domain;	QR	KOG1610	Corticosteroid 11-beta-dehydrogenase and related short chain-type dehydrogenases
O88569	Specific	nucleus	K13158	HNRNPA2B1; heterogeneous nuclear ribonucleoprotein A2/B1		GO:0050658 RNA transport; GO:0010608 posttranscriptional regulation of gene expression; GO:0050686 negative regulation of mRNA processing; GO:0051169 nuclear transport; GO:0044237 cellular metabolic process; GO:0015031 protein transport; GO:0008152 metabolic process; GO:0015931 nucleobase-containing compound transport; GO:0010558 negative regulation of macromolecule biosynthetic process; GO:00431…	GO:0043229 intracellular organelle; GO:0016020 membrane; GO:0044421 extracellular region part; GO:0031982 vesicle; GO:0044446 intracellular organelle part; GO:0005737 cytoplasm; GO:0031981 nuclear lumen; GO:0032991 macromolecular complex; GO:0044424 intracellular part; GO:0005681 spliceosomal complex; GO:0005623 cell; GO:0005576 extracellular region; GO:0044422 organelle part; GO:0031974 membrane…	GO:0003677 DNA binding; GO:0003723 RNA binding; GO:1901265 nucleoside phosphate binding; GO:0097157 pre-mRNA intronic binding; GO:0003730 mRNA 3'-UTR binding; GO:0098847 sequence-specific single stranded DNA binding; GO:0042162 telomeric DNA binding; GO:0003697 single-stranded DNA binding; GO:0000166 nucleotide binding; GO:0043565 sequence-specific DNA binding; GO:0043047 single-stranded telomeri…	IPR000504; IPR012677;	RNA recognition motif domain; Nucleotide-binding alpha-beta plait domain;	R	KOG0118	FOG: RRM domain
O88587	Specific	extracellular	K00545	COMT; catechol O-methyltransferase [EC:2.1.1.6]	mmu00140 Steroid hormone biosynthesis; mmu00350 Tyrosine metabolism; mmu01100 Metabolic pathways; mmu04728 Dopaminergic synapse	GO:0065008 regulation of biological quality; GO:0031335 regulation of sulfur amino acid metabolic process; GO:0022414 reproductive process; GO:0035813 regulation of renal sodium excretion; GO:0045914 negative regulation of catecholamine metabolic process; GO:0044237 cellular metabolic process; GO:0050877 neurological system process; GO:0008285 negative regulation of cell proliferation; GO:0009607…	GO:0016020 membrane; GO:0030425 dendrite; GO:0044421 extracellular region part; GO:0071944 cell periphery; GO:0031982 vesicle; GO:0005737 cytoplasm; GO:0031224 intrinsic component of membrane; GO:0044424 intracellular part; GO:0005623 cell; GO:0043197 dendritic spine; GO:0070062 extracellular exosome; GO:0098590 plasma membrane region; GO:0044309 neuron spine; GO:0044425 membrane part; GO:0044464…	GO:0000287 magnesium ion binding; GO:0008757 S-adenosylmethionine-dependent methyltransferase activity; GO:0008168 methyltransferase activity; GO:0016206 catechol O-methyltransferase activity; GO:0003824 catalytic activity; GO:0005488 binding; GO:0043167 ion binding; GO:0043169 cation binding; GO:0046872 metal ion binding; GO:0016741 transferase activity, transferring one-carbon groups; GO:000817…	IPR029063;	S-adenosyl-L-methionine-dependent methyltransferase;	Q	KOG1663	O-methyltransferase
O88986	Specific	mitochondria	K00639	kbl, GCAT; glycine C-acetyltransferase [EC:2.3.1.29]	mmu00260 Glycine, serine and threonine metabolism; mmu01100 Metabolic pathways	GO:1901606 alpha-amino acid catabolic process; GO:0009066 aspartate family amino acid metabolic process; GO:0044699 single-organism process; GO:0009058 biosynthetic process; GO:0006544 glycine metabolic process; GO:0044237 cellular metabolic process; GO:0071704 organic substance metabolic process; GO:0008152 metabolic process; GO:0006520 cellular amino acid metabolic process; GO:0044248 cellular …	GO:0016020 membrane; GO:0031090 organelle membrane; GO:0005737 cytoplasm; GO:0044424 intracellular part; GO:0016604 nuclear body; GO:0005623 cell; GO:0044422 organelle part; GO:0005740 mitochondrial envelope; GO:0031974 membrane-enclosed lumen; GO:0005654 nucleoplasm; GO:0070013 intracellular organelle lumen; GO:0016607 nuclear speck; GO:0005622 intracellular; GO:0044464 cell part; GO:0019866 org…	GO:0008890 glycine C-acetyltransferase activity; GO:0043167 ion binding; GO:0048037 cofactor binding; GO:0016747 transferase activity, transferring acyl groups other than amino-acyl groups; GO:0030170 pyridoxal phosphate binding; GO:0016407 acetyltransferase activity; GO:1901363 heterocyclic compound binding; GO:0097159 organic cyclic compound binding; GO:0016746 transferase activity, transferrin…	IPR015424; IPR004839; IPR015422; IPR015421;	Pyridoxal phosphate-dependent transferase; Aminotransferase, class I/classII; Pyridoxal phosphate-dependent transferase, major region, subdomain 2; Pyridoxal phosphate-dependent transferase, major region, subdomain 1;	E	KOG1359	Glycine C-acetyltransferase/2-amino-3-ketobutyrate-CoA ligase
P00186	Specific	endoplasmic reticulum	K07409	CYP1A2; cytochrome P450 family 1 subfamily A polypeptide 2 [EC:1.14.14.1]	mmu00140 Steroid hormone biosynthesis; mmu00232 Caffeine metabolism; mmu00380 Tryptophan metabolism; mmu00591 Linoleic acid metabolism; mmu00830 Retinol metabolism; mmu00980 Metabolism of xenobiotics by cytochrome P450; mmu00982 Drug metabolism - cytochrome P450; mmu01100 Metabolic pathways; mmu05204 Chemical carcinogenesis	GO:0018894 dibenzo-p-dioxin metabolic process; GO:0070989 oxidative demethylation; GO:0030323 respiratory tube development; GO:0044699 single-organism process; GO:0044255 cellular lipid metabolic process; GO:0009058 biosynthetic process; GO:0044237 cellular metabolic process; GO:0009607 response to biotic stimulus; GO:0009605 response to external stimulus; GO:0008152 metabolic process; GO:0006091…	GO:0043229 intracellular organelle; GO:0016020 membrane; GO:0042175 nuclear outer membrane-endoplasmic reticulum membrane network; GO:0005783 endoplasmic reticulum; GO:0031090 organelle membrane; GO:0044446 intracellular organelle part; GO:0005737 cytoplasm; GO:0012505 endomembrane system; GO:0044424 intracellular part; GO:0005623 cell; GO:0044422 organelle part; GO:0043231 intracellular membrane…	GO:0016725 oxidoreductase activity, acting on CH or CH2 groups; GO:0005506 iron ion binding; GO:0043167 ion binding; GO:0016705 oxidoreductase activity, acting on paired donors, with incorporation or reduction of molecular oxygen; GO:0034875 caffeine oxidase activity; GO:0005515 protein binding; GO:0032451 demethylase activity; GO:0016491 oxidoreductase activity; GO:1901363 heterocyclic compound …			Q	KOG0156	Cytochrome P450 CYP2 subfamily
P01942	Specific	cytoplasm	K13822	HBA; hemoglobin subunit alpha	mmu05143 African trypanosomiasis; mmu05144 Malaria	GO:0015671 oxygen transport; GO:0044707 single-multicellular organism process; GO:0065008 regulation of biological quality; GO:0015669 gas transport; GO:0043009 chordate embryonic development; GO:0002262 myeloid cell homeostasis; GO:0048869 cellular developmental process; GO:0044699 single-organism process; GO:0050896 response to stimulus; GO:0048468 cell development; GO:0051234 establishment of …	GO:0016020 membrane; GO:0005615 extracellular space; GO:0044421 extracellular region part; GO:0015935 small ribosomal subunit; GO:0031982 vesicle; GO:0005737 cytoplasm; GO:0032991 macromolecular complex; GO:0044424 intracellular part; GO:0005623 cell; GO:0044422 organelle part; GO:0043228 non-membrane-bounded organelle; GO:0070062 extracellular exosome; GO:0044391 ribosomal subunit; GO:0043209 my…	GO:0097159 organic cyclic compound binding; GO:1901363 heterocyclic compound binding; GO:0020037 heme binding; GO:0005506 iron ion binding; GO:0046914 transition metal ion binding; GO:0019825 oxygen binding; GO:0005488 binding; GO:0043167 ion binding; GO:0022892 substrate-specific transporter activity; GO:0046872 metal ion binding; GO:0043169 cation binding; GO:0005344 oxygen transporter activity…	IPR009050; IPR000971; IPR012292;	Globin-like; Globin; Globin/Protoglobin;	C	KOG3378	Globins and related hemoproteins
P05213	Specific	cytoskeleton	K07374	TUBA; tubulin alpha	mmu04145 Phagosome; mmu04210 Apoptosis; mmu04530 Tight junction; mmu04540 Gap junction	GO:0016043 cellular component organization; GO:0051716 cellular response to stimulus; GO:0034097 response to cytokine; GO:0071310 cellular response to organic substance; GO:0010033 response to organic substance; GO:0050896 response to stimulus; GO:0007017 microtubule-based process; GO:0071345 cellular response to cytokine stimulus; GO:0071353 cellular response to interleukin-4; GO:0006457 protein…	GO:0043229 intracellular organelle; GO:0044421 extracellular region part; GO:0099513 polymeric cytoskeletal fiber; GO:0005874 microtubule; GO:0005881 cytoplasmic microtubule; GO:0043232 intracellular non-membrane-bounded organelle; GO:0044430 cytoskeletal part; GO:0031982 vesicle; GO:0005737 cytoplasm; GO:0044446 intracellular organelle part; GO:0099512 supramolecular fiber; GO:0044424 intracellu…	GO:1901265 nucleoside phosphate binding; GO:0031625 ubiquitin protein ligase binding; GO:0016817 hydrolase activity, acting on acid anhydrides; GO:0016787 hydrolase activity; GO:0005515 protein binding; GO:1901363 heterocyclic compound binding; GO:0097159 organic cyclic compound binding; GO:0016462 pyrophosphatase activity; GO:0032553 ribonucleotide binding; GO:0003824 catalytic activity; GO:0005…	IPR003008; IPR023123; IPR008280; IPR018316;	Tubulin/FtsZ, GTPase domain; Tubulin, C-terminal; Tubulin/FtsZ, C-terminal; Tubulin/FtsZ, 2-layer sandwich domain;	Z	KOG1376	Alpha tubulin
P05784	Specific	nucleus	K07604	KRT1; type I keratin, acidic	mmu04915 Estrogen signaling pathway; mmu05150 Staphylococcus aureus infection	GO:0044700 single organism signaling; GO:0010941 regulation of cell death; GO:0010256 endomembrane system organization; GO:0007166 cell surface receptor signaling pathway; GO:0090002 establishment of protein localization to plasma membrane; GO:0044699 single-organism process; GO:0071345 cellular response to cytokine stimulus; GO:0015031 protein transport; GO:0051234 establishment of localization;…	GO:0044421 extracellular region part; GO:0044450 microtubule organizing center part; GO:0030054 cell junction; GO:0071944 cell periphery; GO:0031982 vesicle; GO:0005737 cytoplasm; GO:0099512 supramolecular fiber; GO:0044424 intracellular part; GO:0005913 cell-cell adherens junction; GO:0099080 supramolecular complex; GO:0005911 cell-cell junction; GO:0005623 cell; GO:0044422 organelle part; GO:00…	GO:0097159 organic cyclic compound binding; GO:1901363 heterocyclic compound binding; GO:0098641 cadherin binding involved in cell-cell adhesion; GO:0050839 cell adhesion molecule binding; GO:0003723 RNA binding; GO:0098631 protein binding involved in cell adhesion; GO:0005488 binding; GO:0045296 cadherin binding; GO:0003676 nucleic acid binding; GO:0097110 scaffold protein binding; GO:0005515 pr…			R	KOG0508	Ankyrin repeat protein
P06151	Specific	cytoplasm	K00016	LDH, ldh; L-lactate dehydrogenase [EC:1.1.1.27]	mmu00010 Glycolysis / Gluconeogenesis; mmu00270 Cysteine and methionine metabolism; mmu00620 Pyruvate metabolism; mmu00640 Propanoate metabolism; mmu01100 Metabolic pathways; mmu04066 HIF-1 signaling pathway; mmu04922 Glucagon signaling pathway; mmu05230 Central carbon metabolism in cancer	GO:0046365 monosaccharide catabolic process; GO:0009116 nucleoside metabolic process; GO:0042278 purine nucleoside metabolic process; GO:0019362 pyridine nucleotide metabolic process; GO:0046031 ADP metabolic process; GO:0009167 purine ribonucleoside monophosphate metabolic process; GO:0016053 organic acid biosynthetic process; GO:0009117 nucleotide metabolic process; GO:0044699 single-organism p…	GO:0016020 membrane; GO:0044421 extracellular region part; GO:0030054 cell junction; GO:0031982 vesicle; GO:0005737 cytoplasm; GO:0036126 sperm flagellum; GO:0097729 9+2 motile cilium; GO:0044424 intracellular part; GO:0005913 cell-cell adherens junction; GO:0005623 cell; GO:0005911 cell-cell junction; GO:0044422 organelle part; GO:0070062 extracellular exosome; GO:0044441 ciliary part; GO:000562…	GO:0016614 oxidoreductase activity, acting on CH-OH group of donors; GO:0016616 oxidoreductase activity, acting on the CH-OH group of donors, NAD or NADP as acceptor; GO:0098641 cadherin binding involved in cell-cell adhesion; GO:0050839 cell adhesion molecule binding; GO:0098631 protein binding involved in cell adhesion; GO:0003824 catalytic activity; GO:0005488 binding; GO:0045296 cadherin bind…	IPR022383; IPR016040; IPR001236; IPR015955;	Lactate/malate dehydrogenase, C-terminal; NAD(P)-binding domain; Lactate/malate dehydrogenase, N-terminal; Lactate dehydrogenase/glycoside hydrolase, family 4, C-terminal;	C	KOG1495	Lactate dehydrogenase
P07901	Specific	cytoplasm	K04079	HSP90A, htpG; molecular chaperone HtpG	mmu04141 Protein processing in endoplasmic reticulum; mmu04151 PI3K-Akt signaling pathway; mmu04217 Necroptosis; mmu04612 Antigen processing and presentation; mmu04621 NOD-like receptor signaling pathway; mmu04657 IL-17 signaling pathway; mmu04659 Th17 cell differentiation; mmu04914 Progesterone-mediated oocyte maturation; mmu04915 Estrogen signaling pathway; mmu05200 Pathways in cancer; mmu05215…	GO:0044085 cellular component biogenesis; GO:0002694 regulation of leukocyte activation; GO:0065008 regulation of biological quality; GO:0022613 ribonucleoprotein complex biogenesis; GO:0045428 regulation of nitric oxide biosynthetic process; GO:0022618 ribonucleoprotein complex assembly; GO:0051973 positive regulation of telomerase activity; GO:0009891 positive regulation of biosynthetic process…	GO:0016020 membrane; GO:0044421 extracellular region part; GO:0031410 cytoplasmic vesicle; GO:0071944 cell periphery; GO:0032587 ruffle membrane; GO:0031982 vesicle; GO:0005737 cytoplasm; GO:0044424 intracellular part; GO:0005623 cell; GO:0048770 pigment granule; GO:0070062 extracellular exosome; GO:0098590 plasma membrane region; GO:0031256 leading edge membrane; GO:0043209 myelin sheath; GO:000…	GO:0030235 nitric-oxide synthase regulator activity; GO:1901265 nucleoside phosphate binding; GO:0016773 phosphotransferase activity, alcohol group as acceptor; GO:1990782 protein tyrosine kinase binding; GO:0070182 DNA polymerase binding; GO:0046983 protein dimerization activity; GO:0019901 protein kinase binding; GO:0016817 hydrolase activity, acting on acid anhydrides; GO:0004713 protein tyros…	IPR020568; IPR020575; IPR003594;	Ribosomal protein S5 domain 2-type fold; Heat shock protein Hsp90, N-terminal; Histidine kinase-like ATPase, C-terminal domain;	O	KOG0019	Molecular chaperone (HSP90 family)
P08113	Specific	endoplasmic reticulum	K09487	HSP90B, TRA1; heat shock protein 90kDa beta	mmu04141 Protein processing in endoplasmic reticulum; mmu04151 PI3K-Akt signaling pathway; mmu04657 IL-17 signaling pathway; mmu04915 Estrogen signaling pathway; mmu04918 Thyroid hormone synthesis; mmu05200 Pathways in cancer; mmu05215 Prostate cancer; mmu05418 Fluid shear stress and atherosclerosis	GO:0044085 cellular component biogenesis; GO:0010941 regulation of cell death; GO:0046683 response to organophosphorus; GO:0044699 single-organism process; GO:0036503 ERAD pathway; GO:0044237 cellular metabolic process; GO:0015031 protein transport; GO:0051234 establishment of localization; GO:0006457 protein folding; GO:0030036 actin cytoskeleton organization; GO:0008152 metabolic process; GO:00…	GO:0016020 membrane; GO:0042175 nuclear outer membrane-endoplasmic reticulum membrane network; GO:0044421 extracellular region part; GO:0005783 endoplasmic reticulum; GO:0031410 cytoplasmic vesicle; GO:0071944 cell periphery; GO:0030054 cell junction; GO:0031982 vesicle; GO:0005737 cytoplasm; GO:0032991 macromolecular complex; GO:0044424 intracellular part; GO:0005623 cell; GO:0044422 organelle p…	GO:1901265 nucleoside phosphate binding; GO:0019903 protein phosphatase binding; GO:0005102 receptor binding; GO:0005515 protein binding; GO:1901363 heterocyclic compound binding; GO:0097159 organic cyclic compound binding; GO:0032553 ribonucleotide binding; GO:0005488 binding; GO:0032550 purine ribonucleoside binding; GO:0043168 anion binding; GO:0032559 adenyl ribonucleotide binding; GO:0030554…	IPR020575; IPR020568; IPR003594;	Heat shock protein Hsp90, N-terminal; Ribosomal protein S5 domain 2-type fold; Histidine kinase-like ATPase, C-terminal domain;	O	KOG0020	Endoplasmic reticulum glucose-regulated protein (GRP94/endoplasmin), HSP90 family
P0CG49	Specific	cytoplasm	K04551	UBB; ubiquitin B	mmu04137 Mitophagy - animal; mmu04144 Endocytosis; mmu05012 Parkinson disease; mmu05167 Kaposi sarcoma-associated herpesvirus infection	GO:0044700 single organism signaling; GO:0010941 regulation of cell death; GO:0065008 regulation of biological quality; GO:0007166 cell surface receptor signaling pathway; GO:0022414 reproductive process; GO:0007420 brain development; GO:0007144 female meiosis I; GO:0008584 male gonad development; GO:0032989 cellular component morphogenesis; GO:0060613 fat pad development; GO:0044702 single organ…	GO:0043229 intracellular organelle; GO:0042995 cell projection; GO:0044446 intracellular organelle part; GO:0005737 cytoplasm; GO:0043025 neuronal cell body; GO:0031981 nuclear lumen; GO:0044424 intracellular part; GO:0005829 cytosol; GO:0005623 cell; GO:0044422 organelle part; GO:0005739 mitochondrion; GO:0031974 membrane-enclosed lumen; GO:0043231 intracellular membrane-bounded organelle; GO:00…	GO:0005515 protein binding; GO:0005488 binding;	IPR029071; IPR000626;	Ubiquitin-related domain; Ubiquitin domain;	OR	KOG0001	Ubiquitin and ubiquitin-like proteins
P10649	Specific	cytoplasm	K00799	GST, gst; glutathione S-transferase [EC:2.5.1.18]	mmu00480 Glutathione metabolism; mmu00980 Metabolism of xenobiotics by cytochrome P450; mmu00982 Drug metabolism - cytochrome P450; mmu00983 Drug metabolism - other enzymes; mmu01100 Metabolic pathways; mmu01524 Platinum drug resistance; mmu05200 Pathways in cancer; mmu05204 Chemical carcinogenesis; mmu05225 Hepatocellular carcinoma; mmu05418 Fluid shear stress and atherosclerosis	GO:0006790 sulfur compound metabolic process; GO:0051716 cellular response to stimulus; GO:0035690 cellular response to drug; GO:0006518 peptide metabolic process; GO:0006807 nitrogen compound metabolic process; GO:0043603 cellular amide metabolic process; GO:0050896 response to stimulus; GO:0044237 cellular metabolic process; GO:0071704 organic substance metabolic process; GO:0042493 response to…	GO:0044424 intracellular part; GO:0005623 cell; GO:0005622 intracellular; GO:0043209 myelin sheath; GO:0044464 cell part; GO:0005737 cytoplasm;	GO:0004364 glutathione transferase activity; GO:0042802 identical protein binding; GO:0046982 protein heterodimerization activity; GO:0003824 catalytic activity; GO:0042803 protein homodimerization activity; GO:0005488 binding; GO:0046983 protein dimerization activity; GO:0016765 transferase activity, transferring alkyl or aryl (other than methyl) groups; GO:0005515 protein binding; GO:0016740 tr…	IPR004046; IPR010987; IPR004045; IPR012336;	Glutathione S-transferase, C-terminal; Glutathione S-transferase, C-terminal-like; Glutathione S-transferase, N-terminal; Thioredoxin-like fold;	O	KOG1695	Glutathione S-transferase
P11725	Specific	mitochondria	K00611	OTC, argF, argI; ornithine carbamoyltransferase [EC:2.1.3.3]	mmu00220 Arginine biosynthesis; mmu01100 Metabolic pathways; mmu01230 Biosynthesis of amino acids	GO:0044085 cellular component biogenesis; GO:1901606 alpha-amino acid catabolic process; GO:0001101 response to acid chemical; GO:0065008 regulation of biological quality; GO:0048732 gland development; GO:0019240 citrulline biosynthetic process; GO:0016053 organic acid biosynthetic process; GO:0044699 single-organism process; GO:0009058 biosynthetic process; GO:0044237 cellular metabolic process;…	GO:0016020 membrane; GO:0005759 mitochondrial matrix; GO:0043229 intracellular organelle; GO:0044429 mitochondrial part; GO:0031090 organelle membrane; GO:0031967 organelle envelope; GO:0005737 cytoplasm; GO:0044446 intracellular organelle part; GO:0044424 intracellular part; GO:0005623 cell; GO:0005739 mitochondrion; GO:0044422 organelle part; GO:0005740 mitochondrial envelope; GO:0031974 membra…	GO:0016597 amino acid binding; GO:0043167 ion binding; GO:0043177 organic acid binding; GO:0016741 transferase activity, transferring one-carbon groups; GO:0042301 phosphate ion binding; GO:0004585 ornithine carbamoyltransferase activity; GO:0016743 carboxyl- or carbamoyltransferase activity; GO:0031406 carboxylic acid binding; GO:0003824 catalytic activity; GO:0005488 binding; GO:0005543 phospho…	IPR006132; IPR006131;	Aspartate/ornithine carbamoyltransferase, carbamoyl-P binding; Aspartate/ornithine carbamoyltransferase, Asp/Orn-binding domain;	E	KOG1504	Ornithine carbamoyltransferase OTC/ARG3
P11983	Specific	cytoplasm	K09493	CCT1, TCP1; T-complex protein 1 subunit alpha		GO:0065008 regulation of biological quality; GO:0010941 regulation of cell death; GO:0035036 sperm-egg recognition; GO:0022414 reproductive process; GO:0051973 positive regulation of telomerase activity; GO:0061077 chaperone-mediated protein folding; GO:0009891 positive regulation of biosynthetic process; GO:0044699 single-organism process; GO:0033032 regulation of myeloid cell apoptotic process;…	GO:0044421 extracellular region part; GO:0044450 microtubule organizing center part; GO:0005737 cytoplasm; GO:0032991 macromolecular complex; GO:0005623 cell; GO:0099080 supramolecular complex; GO:0000792 heterochromatin; GO:0044422 organelle part; GO:0002199 zona pellucida receptor complex; GO:0043228 non-membrane-bounded organelle; GO:0070062 extracellular exosome; GO:0044454 nuclear chromosome…	GO:0003723 RNA binding; GO:0005524 ATP binding; GO:1901265 nucleoside phosphate binding; GO:0031625 ubiquitin protein ligase binding; GO:0001882 nucleoside binding; GO:0043167 ion binding; GO:0005515 protein binding; GO:0000166 nucleotide binding; GO:0044183 protein binding involved in protein folding; GO:1901363 heterocyclic compound binding; GO:0097159 organic cyclic compound binding; GO:003254…	IPR027410; IPR027409; IPR027413;	TCP-1-like chaperonin intermediate domain; GroEL-like apical domain; GroEL-like equatorial domain;	O	KOG0360	Chaperonin complex component, TCP-1 alpha subunit (CCT1)
P13707	Specific	cytoplasm	K00006	GPD1; glycerol-3-phosphate dehydrogenase (NAD+) [EC:1.1.1.8]	mmu00564 Glycerophospholipid metabolism	GO:0019362 pyridine nucleotide metabolic process; GO:0046683 response to organophosphorus; GO:0044255 cellular lipid metabolic process; GO:0051194 positive regulation of cofactor metabolic process; GO:0071345 cellular response to cytokine stimulus; GO:0044237 cellular metabolic process; GO:0006006 glucose metabolic process; GO:0008152 metabolic process; GO:0006094 gluconeogenesis; GO:0006091 gene…	GO:0043229 intracellular organelle; GO:0044421 extracellular region part; GO:0031982 vesicle; GO:0005737 cytoplasm; GO:0032991 macromolecular complex; GO:0044424 intracellular part; GO:0005623 cell; GO:0005829 cytosol; GO:0005576 extracellular region; GO:0005739 mitochondrion; GO:0043231 intracellular membrane-bounded organelle; GO:0043226 organelle; GO:0070062 extracellular exosome; GO:1902494 c…	GO:1901265 nucleoside phosphate binding; GO:0046983 protein dimerization activity; GO:0005515 protein binding; GO:0000166 nucleotide binding; GO:0048037 cofactor binding; GO:0004368 glycerol-3-phosphate dehydrogenase activity; GO:0016491 oxidoreductase activity; GO:0016614 oxidoreductase activity, acting on CH-OH group of donors; GO:1901363 heterocyclic compound binding; GO:0097159 organic cyclic…	IPR013328; IPR008927; IPR016040; IPR011128; IPR006109;	6-phosphogluconate dehydrogenase, domain 2; 6-phosphogluconate dehydrogenase C-terminal domain-like; NAD(P)-binding domain; Glycerol-3-phosphate dehydrogenase, NAD-dependent, N-terminal; Glycerol-3-phosphate dehydrogenase, NAD-dependent, C-terminal;	C	KOG2711	Glycerol-3-phosphate dehydrogenase/dihydroxyacetone 3-phosphate reductase
P14206	Specific	cytoplasm				GO:0050658 RNA transport; GO:0044085 cellular component biogenesis; GO:0022613 ribonucleoprotein complex biogenesis; GO:0006518 peptide metabolic process; GO:0051029 rRNA transport; GO:0022618 ribonucleoprotein complex assembly; GO:0000461 endonucleolytic cleavage to generate mature 3'-end of SSU-rRNA from (SSU-rRNA, 5.8S rRNA, LSU-rRNA); GO:0048869 cellular developmental process; GO:0044699 sing…	GO:0016020 membrane; GO:0044421 extracellular region part; GO:0071944 cell periphery; GO:0031982 vesicle; GO:0015935 small ribosomal subunit; GO:0005737 cytoplasm; GO:0043025 neuronal cell body; GO:0032991 macromolecular complex; GO:0044424 intracellular part; GO:0005623 cell; GO:0044420 extracellular matrix component; GO:0044422 organelle part; GO:0030684 preribosome; GO:0005604 basement membran…	GO:0003723 RNA binding; GO:0044877 macromolecular complex binding; GO:0005055 laminin receptor activity; GO:0005515 protein binding; GO:0003735 structural constituent of ribosome; GO:0050840 extracellular matrix binding; GO:1901363 heterocyclic compound binding; GO:0097159 organic cyclic compound binding; GO:0043022 ribosome binding; GO:0060089 molecular transducer activity; GO:0004872 receptor a…	IPR023591; IPR032281;	Ribosomal protein S2, flavodoxin-like domain; 40S ribosomal protein SA, C-terminal domain;	J	KOG0830	40S ribosomal protein SA (P40)/Laminin receptor 1
P14211	Specific	endoplasmic reticulum	K08057	CALR; calreticulin	mmu04141 Protein processing in endoplasmic reticulum; mmu04145 Phagosome; mmu04612 Antigen processing and presentation; mmu05142 Chagas disease (American trypanosomiasis); mmu05163 Human cytomegalovirus infection; mmu05166 Human T-cell leukemia virus 1 infection; mmu05168 Herpes simplex virus 1 infection; mmu05169 Epstein-Barr virus infection; mmu05170 Human immunodeficiency virus 1 infection	GO:0044085 cellular component biogenesis; GO:0022414 reproductive process; GO:0010608 posttranscriptional regulation of gene expression; GO:0009891 positive regulation of biosynthetic process; GO:0010564 regulation of cell cycle process; GO:1901224 positive regulation of NIK/NF-kappaB signaling; GO:0065003 macromolecular complex assembly; GO:0051716 cellular response to stimulus; GO:0051054 posit…	GO:0016020 membrane; GO:0044421 extracellular region part; GO:0009897 external side of plasma membrane; GO:0005737 cytoplasm; GO:0032991 macromolecular complex; GO:0033018 sarcoplasmic reticulum lumen; GO:0016528 sarcoplasm; GO:0005623 cell; GO:0044422 organelle part; GO:0070062 extracellular exosome; GO:0005925 focal adhesion; GO:0005622 intracellular; GO:0099503 secretory vesicle; GO:0030055 ce…	GO:0031625 ubiquitin protein ligase binding; GO:0005102 receptor binding; GO:0042562 hormone binding; GO:0050681 androgen receptor binding; GO:0005515 protein binding; GO:0005178 integrin binding; GO:0051427 hormone receptor binding; GO:1901363 heterocyclic compound binding; GO:0097159 organic cyclic compound binding; GO:0003729 mRNA binding; GO:0042277 peptide binding; GO:0005488 binding; GO:003…	IPR009033; IPR013320;	Calreticulin/calnexin, P domain; Concanavalin A-like lectin/glucanase domain;	O	KOG0674	Calreticulin
P14685	Specific	cytoplasm	K03033	PSMD3, RPN3; 26S proteasome regulatory subunit N3	mmu03050 Proteasome; mmu05169 Epstein-Barr virus infection	GO:0051603 proteolysis involved in cellular protein catabolic process; GO:0044257 cellular protein catabolic process; GO:0060255 regulation of macromolecule metabolic process; GO:0044267 cellular protein metabolic process; GO:0044237 cellular metabolic process; GO:0071704 organic substance metabolic process; GO:0008152 metabolic process; GO:0044248 cellular catabolic process; GO:0006508 proteolys…	GO:0043229 intracellular organelle; GO:0016020 membrane; GO:0044421 extracellular region part; GO:0008541 proteasome regulatory particle, lid subcomplex; GO:0000502 proteasome complex; GO:0005838 proteasome regulatory particle; GO:0031982 vesicle; GO:0032991 macromolecular complex; GO:0044424 intracellular part; GO:0005623 cell; GO:0005576 extracellular region; GO:1905369 endopeptidase complex; G…	GO:0005515 protein binding; GO:0030234 enzyme regulator activity; GO:0098772 molecular function regulator; GO:0005488 binding;	IPR011991; IPR000717; IPR011990; IPR013586;	Winged helix-turn-helix DNA-binding domain; Proteasome component (PCI) domain; Tetratricopeptide-like helical domain; 26S proteasome regulatory subunit, C-terminal;	O	KOG2581	26S proteasome regulatory complex, subunit RPN3/PSMD3
P16331	Specific	cytoplasm	K00500	phhA, PAH; phenylalanine-4-hydroxylase [EC:1.14.16.1]	mmu00360 Phenylalanine metabolism; mmu00400 Phenylalanine, tyrosine and tryptophan biosynthesis; mmu00790 Folate biosynthesis; mmu01100 Metabolic pathways; mmu01230 Biosynthesis of amino acids	GO:1902222 erythrose 4-phosphate/phosphoenolpyruvate family amino acid catabolic process; GO:1901606 alpha-amino acid catabolic process; GO:0006725 cellular aromatic compound metabolic process; GO:0044699 single-organism process; GO:0044237 cellular metabolic process; GO:0006559 L-phenylalanine catabolic process; GO:0071704 organic substance metabolic process; GO:0008152 metabolic process; GO:000…	GO:0070062 extracellular exosome; GO:0043226 organelle; GO:0044421 extracellular region part; GO:0031982 vesicle; GO:1903561 extracellular vesicle; GO:0043227 membrane-bounded organelle; GO:0005576 extracellular region; GO:0043230 extracellular organelle;	GO:0016597 amino acid binding; GO:0005506 iron ion binding; GO:0043167 ion binding; GO:0043177 organic acid binding; GO:0004505 phenylalanine 4-monooxygenase activity; GO:0016705 oxidoreductase activity, acting on paired donors, with incorporation or reduction of molecular oxygen; GO:0016491 oxidoreductase activity; GO:0031406 carboxylic acid binding; GO:0046914 transition metal ion binding; GO:0…	IPR002912; IPR019774;	ACT domain; Aromatic amino acid hydroxylase, C-terminal;	E	KOG3820	Aromatic amino acid hydroxylase
P17182	Specific	cytoplasm	K01689	ENO, eno; enolase [EC:4.2.1.11]	mmu00010 Glycolysis / Gluconeogenesis; mmu01100 Metabolic pathways; mmu01200 Carbon metabolism; mmu01230 Biosynthesis of amino acids; mmu03018 RNA degradation; mmu04066 HIF-1 signaling pathway	GO:0006757 ATP generation from ADP; GO:0009116 nucleoside metabolic process; GO:0042278 purine nucleoside metabolic process; GO:0006165 nucleoside diphosphate phosphorylation; GO:0046031 ADP metabolic process; GO:0019362 pyridine nucleotide metabolic process; GO:0006096 glycolytic process; GO:0009167 purine ribonucleoside monophosphate metabolic process; GO:0043009 chordate embryonic development;…	GO:0016020 membrane; GO:0005615 extracellular space; GO:0044421 extracellular region part; GO:0019898 extrinsic component of membrane; GO:0030054 cell junction; GO:0071944 cell periphery; GO:0031982 vesicle; GO:0005737 cytoplasm; GO:0032991 macromolecular complex; GO:0044424 intracellular part; GO:0005913 cell-cell adherens junction; GO:0005911 cell-cell junction; GO:0005623 cell; GO:0070062 extr…	GO:0000287 magnesium ion binding; GO:0003723 RNA binding; GO:0004634 phosphopyruvate hydratase activity; GO:0046982 protein heterodimerization activity; GO:0046983 protein dimerization activity; GO:0043167 ion binding; GO:0016829 lyase activity; GO:0005515 protein binding; GO:0016836 hydro-lyase activity; GO:0098632 protein binding involved in cell-cell adhesion; GO:0016835 carbon-oxygen lyase ac…	IPR029065; IPR029017; IPR020810; IPR020811;	Enolase C-terminal domain-like; Enolase N-terminal domain-like; Enolase, C-terminal TIM barrel domain; Enolase, N-terminal;	G	KOG2670	Enolase
P17183	Specific	cytoplasm	K01689	ENO, eno; enolase [EC:4.2.1.11]	mmu00010 Glycolysis / Gluconeogenesis; mmu01100 Metabolic pathways; mmu01200 Carbon metabolism; mmu01230 Biosynthesis of amino acids; mmu03018 RNA degradation; mmu04066 HIF-1 signaling pathway	GO:0006757 ATP generation from ADP; GO:0009116 nucleoside metabolic process; GO:0042278 purine nucleoside metabolic process; GO:0006165 nucleoside diphosphate phosphorylation; GO:0046031 ADP metabolic process; GO:0019362 pyridine nucleotide metabolic process; GO:0006096 glycolytic process; GO:0009167 purine ribonucleoside monophosphate metabolic process; GO:0009117 nucleotide metabolic process; G…	GO:0016020 membrane; GO:0005615 extracellular space; GO:0044421 extracellular region part; GO:0071944 cell periphery; GO:0031982 vesicle; GO:0005737 cytoplasm; GO:0043025 neuronal cell body; GO:0032991 macromolecular complex; GO:0044424 intracellular part; GO:0005829 cytosol; GO:0005623 cell; GO:0005576 extracellular region; GO:0005886 plasma membrane; GO:0070062 extracellular exosome; GO:0043226…	GO:0000287 magnesium ion binding; GO:0004634 phosphopyruvate hydratase activity; GO:0003824 catalytic activity; GO:0005488 binding; GO:0043167 ion binding; GO:0046872 metal ion binding; GO:0043169 cation binding; GO:0016829 lyase activity; GO:0016836 hydro-lyase activity; GO:0016835 carbon-oxygen lyase activity;	IPR029065; IPR029017; IPR020810; IPR020811;	Enolase C-terminal domain-like; Enolase N-terminal domain-like; Enolase, C-terminal TIM barrel domain; Enolase, N-terminal;	G	KOG2670	Enolase
P17225	Specific	nucleus	K14948	PTBP2, NPTB; polypyrimidine tract-binding protein 2		GO:0051093 negative regulation of developmental process; GO:0075522 IRES-dependent viral translational initiation; GO:0000381 regulation of alternative mRNA splicing, via spliceosome; GO:0006518 peptide metabolic process; GO:0009891 positive regulation of biosynthetic process; GO:0050686 negative regulation of mRNA processing; GO:0009058 biosynthetic process; GO:0044764 multi-organism cellular pr…	GO:0043229 intracellular organelle; GO:0016020 membrane; GO:0044421 extracellular region part; GO:0031982 vesicle; GO:0044424 intracellular part; GO:0005623 cell; GO:0005576 extracellular region; GO:0043226 organelle; GO:0070062 extracellular exosome; GO:0043231 intracellular membrane-bounded organelle; GO:0005634 nucleus; GO:0005622 intracellular; GO:0044464 cell part; GO:1903561 extracellular v…	GO:0097159 organic cyclic compound binding; GO:1901363 heterocyclic compound binding; GO:0003723 RNA binding; GO:1901265 nucleoside phosphate binding; GO:0005488 binding; GO:0003676 nucleic acid binding; GO:0036002 pre-mRNA binding; GO:0005515 protein binding; GO:0000166 nucleotide binding; GO:0036094 small molecule binding;	IPR000504; IPR012677;	RNA recognition motif domain; Nucleotide-binding alpha-beta plait domain;	A	KOG1190	Polypyrimidine tract-binding protein
P17563	Specific	cytoplasm	K17285	SELENBP1; selenium-binding protein 1	mmu00920 Sulfur metabolism; mmu01100 Metabolic pathways	GO:0032502 developmental process; GO:0048869 cellular developmental process; GO:0044763 single-organism cellular process; GO:0044699 single-organism process; GO:0071702 organic substance transport; GO:0015031 protein transport; GO:0051234 establishment of localization; GO:0006810 transport; GO:0045184 establishment of protein localization; GO:0030154 cell differentiation; GO:0044767 single-organi…	GO:0016020 membrane; GO:0005615 extracellular space; GO:0044421 extracellular region part; GO:0005737 cytoplasm; GO:0031982 vesicle; GO:0044424 intracellular part; GO:0005623 cell; GO:0044422 organelle part; GO:0043228 non-membrane-bounded organelle; GO:0031974 membrane-enclosed lumen; GO:0070062 extracellular exosome; GO:0070013 intracellular organelle lumen; GO:0005622 intracellular; GO:0044464…	GO:0005515 protein binding; GO:0008430 selenium binding; GO:0005488 binding;	IPR015943;	WD40/YVTN repeat-like-containing domain;	P	KOG0918	Selenium-binding protein
P17932	Specific	cytoplasm	K02912	RP-L32e, RPL32; large subunit ribosomal protein L32e	mmu03010 Ribosome	GO:0006518 peptide metabolic process; GO:0043043 peptide biosynthetic process; GO:0044267 cellular protein metabolic process; GO:0006807 nitrogen compound metabolic process; GO:0009058 biosynthetic process; GO:0043603 cellular amide metabolic process; GO:0044238 primary metabolic process; GO:1901566 organonitrogen compound biosynthetic process; GO:1901576 organic substance biosynthetic process; G…	GO:0005840 ribosome; GO:0043229 intracellular organelle; GO:0043232 intracellular non-membrane-bounded organelle; GO:0022625 cytosolic large ribosomal subunit; GO:0044446 intracellular organelle part; GO:0005737 cytoplasm; GO:0032991 macromolecular complex; GO:0044424 intracellular part; GO:0005829 cytosol; GO:0005623 cell; GO:0044422 organelle part; GO:0043228 non-membrane-bounded organelle; GO:…	GO:0003735 structural constituent of ribosome; GO:0005198 structural molecule activity;			J	KOG0878	60S ribosomal protein L32
P19096	Specific	cytoplasm	K00665	FASN; fatty acid synthase, animal type [EC:2.3.1.85]	mmu00061 Fatty acid biosynthesis; mmu01100 Metabolic pathways; mmu01212 Fatty acid metabolism; mmu04152 AMPK signaling pathway; mmu04910 Insulin signaling pathway	GO:0001649 osteoblast differentiation; GO:0044707 single-multicellular organism process; GO:0048732 gland development; GO:0016053 organic acid biosynthetic process; GO:0071310 cellular response to organic substance; GO:0048869 cellular developmental process; GO:0044699 single-organism process; GO:0044255 cellular lipid metabolic process; GO:0009058 biosynthetic process; GO:0050896 response to sti…	GO:0016020 membrane; GO:0044421 extracellular region part; GO:0031410 cytoplasmic vesicle; GO:0071944 cell periphery; GO:0030054 cell junction; GO:0031982 vesicle; GO:0005737 cytoplasm; GO:0044424 intracellular part; GO:0005913 cell-cell adherens junction; GO:0005623 cell; GO:0005911 cell-cell junction; GO:0048770 pigment granule; GO:0070062 extracellular exosome; GO:0042587 glycogen granule; GO:…	GO:0016417 S-acyltransferase activity; GO:0070402 NADPH binding; GO:0097159 organic cyclic compound binding; GO:0016746 transferase activity, transferring acyl groups; GO:0042802 identical protein binding; GO:0003824 catalytic activity; GO:0005488 binding; GO:0043168 anion binding; GO:0004312 fatty acid synthase activity; GO:0016419 S-malonyltransferase activity; GO:0004313 [acyl-carrier-protein]…	IPR016035; IPR020807; IPR013149; IPR020841; IPR011032; IPR020843; IPR013968; IPR016036; IPR013217; IPR032821; IPR029058; IPR014031; IPR029063; IPR014043; IPR014030; IPR020801; IPR016039; IPR020806; IPR023102; IPR001031; IPR016040; IPR009081; IPR001227;	Acyl transferase/acyl hydrolase/lysophospholipase; Polyketide synthase, dehydratase domain; Alcohol dehydrogenase, C-terminal; Polyketide synthase, beta-ketoacyl synthase domain; GroES-like; Polyketide synthase, enoylreductase domain; Polyketide synthase, ketoreductase domain; Malonyl-CoA ACP transacylase, ACP-binding; Methyltransferase type 12; Ketoacyl-synthetase, C-terminal extension; Alpha/Be…	I	KOG1202	Animal-type fatty acid synthase and related proteins
P19253	Specific	cytoplasm	K02872	RP-L13Ae, RPL13A; large subunit ribosomal protein L13Ae	mmu03010 Ribosome	GO:0065008 regulation of biological quality; GO:0006518 peptide metabolic process; GO:0010608 posttranscriptional regulation of gene expression; GO:0030323 respiratory tube development; GO:0044237 cellular metabolic process; GO:0071345 cellular response to cytokine stimulus; GO:0009607 response to biotic stimulus; GO:0009605 response to external stimulus; GO:0008152 metabolic process; GO:0043170 …	GO:0016020 membrane; GO:0030054 cell junction; GO:0005737 cytoplasm; GO:0032991 macromolecular complex; GO:0044424 intracellular part; GO:0005623 cell; GO:0097452 GAIT complex; GO:0044422 organelle part; GO:0043228 non-membrane-bounded organelle; GO:0031974 membrane-enclosed lumen; GO:0005925 focal adhesion; GO:0070013 intracellular organelle lumen; GO:0044391 ribosomal subunit; GO:0005622 intrac…	GO:0097159 organic cyclic compound binding; GO:1901363 heterocyclic compound binding; GO:0003729 mRNA binding; GO:0003723 RNA binding; GO:0005488 binding; GO:0003676 nucleic acid binding; GO:0005198 structural molecule activity; GO:0003735 structural constituent of ribosome;			J	KOG3204	60S ribosomal protein L13a
P23116	Specific	nucleus	K03254	EIF3A; translation initiation factor 3 subunit A	mmu03013 RNA transport	GO:0044085 cellular component biogenesis; GO:0075522 IRES-dependent viral translational initiation; GO:0022613 ribonucleoprotein complex biogenesis; GO:0075525 viral translational termination-reinitiation; GO:0006518 peptide metabolic process; GO:0022618 ribonucleoprotein complex assembly; GO:0009968 negative regulation of signal transduction; GO:0023051 regulation of signaling; GO:0009058 biosyn…	GO:0016020 membrane; GO:0005874 microtubule; GO:0005737 cytoplasm; GO:0032991 macromolecular complex; GO:0071541 eukaryotic translation initiation factor 3 complex, eIF3m; GO:0044424 intracellular part; GO:0099512 supramolecular fiber; GO:0005623 cell; GO:0099080 supramolecular complex; GO:0044422 organelle part; GO:0043228 non-membrane-bounded organelle; GO:0031974 membrane-enclosed lumen; GO:00…	GO:0097159 organic cyclic compound binding; GO:1901363 heterocyclic compound binding; GO:0003729 mRNA binding; GO:0008135 translation factor activity, RNA binding; GO:0003723 RNA binding; GO:0030971 receptor tyrosine kinase binding; GO:1990782 protein tyrosine kinase binding; GO:0005102 receptor binding; GO:0005488 binding; GO:0019901 protein kinase binding; GO:0003676 nucleic acid binding; GO:00…	IPR000717;	Proteasome component (PCI) domain;	J	KOG2072	Translation initiation factor 3, subunit a (eIF-3a)
P26150	Specific	plasma membrane				GO:0044711 single-organism biosynthetic process; GO:0055114 oxidation-reduction process; GO:0008202 steroid metabolic process; GO:1901360 organic cyclic compound metabolic process; GO:0044699 single-organism process; GO:0009058 biosynthetic process; GO:0044238 primary metabolic process; GO:1901576 organic substance biosynthetic process; GO:0071704 organic substance metabolic process; GO:0008610 l…	GO:0016020 membrane; GO:0042175 nuclear outer membrane-endoplasmic reticulum membrane network; GO:0005783 endoplasmic reticulum; GO:0031090 organelle membrane; GO:0005737 cytoplasm; GO:0031224 intrinsic component of membrane; GO:0044424 intracellular part; GO:0005623 cell; GO:0044422 organelle part; GO:0031974 membrane-enclosed lumen; GO:0005740 mitochondrial envelope; GO:0070013 intracellular or…	GO:0016229 steroid dehydrogenase activity; GO:0016614 oxidoreductase activity, acting on CH-OH group of donors; GO:0016616 oxidoreductase activity, acting on the CH-OH group of donors, NAD or NADP as acceptor; GO:0004769 steroid delta-isomerase activity; GO:0016853 isomerase activity; GO:0033764 steroid dehydrogenase activity, acting on the CH-OH group of donors, NAD or NADP as acceptor; GO:00038…	IPR016040; IPR002225;	NAD(P)-binding domain; 3-beta hydroxysteroid dehydrogenase/isomerase;	IE	KOG1430	C-3 sterol dehydrogenase/3-beta-hydroxysteroid dehydrogenase and related dehydrogenases
P28271	Specific	cytoplasm	K01681	ACO, acnA; aconitate hydratase [EC:4.2.1.3]	mmu00020 Citrate cycle (TCA cycle); mmu00630 Glyoxylate and dicarboxylate metabolism; mmu01100 Metabolic pathways; mmu01200 Carbon metabolism; mmu01210 2-Oxocarboxylic acid metabolism; mmu01230 Biosynthesis of amino acids	GO:0065008 regulation of biological quality; GO:0007586 digestion; GO:0010608 posttranscriptional regulation of gene expression; GO:0050892 intestinal absorption; GO:0044699 single-organism process; GO:0044237 cellular metabolic process; GO:0051234 establishment of localization; GO:0008152 metabolic process; GO:0006091 generation of precursor metabolites and energy; GO:0055065 metal ion homeostas…	GO:0043229 intracellular organelle; GO:0044421 extracellular region part; GO:0005783 endoplasmic reticulum; GO:0031982 vesicle; GO:0005737 cytoplasm; GO:0012505 endomembrane system; GO:0044424 intracellular part; GO:0005829 cytosol; GO:0005623 cell; GO:0005576 extracellular region; GO:0005739 mitochondrion; GO:0043231 intracellular membrane-bounded organelle; GO:0043226 organelle; GO:0070062 extr…	GO:0003723 RNA binding; GO:0043167 ion binding; GO:0003994 aconitate hydratase activity; GO:0016829 lyase activity; GO:0016836 hydro-lyase activity; GO:0051539 4 iron, 4 sulfur cluster binding; GO:0016835 carbon-oxygen lyase activity; GO:1901363 heterocyclic compound binding; GO:0097159 organic cyclic compound binding; GO:0003729 mRNA binding; GO:0003824 catalytic activity; GO:0005488 binding; GO…	IPR001030; IPR000573; IPR015932; IPR015928; IPR015931;	Aconitase/3-isopropylmalate dehydratase large subunit, alpha/beta/alpha domain; Aconitase A/isopropylmalate dehydratase small subunit, swivel domain; Aconitase/3-isopropylmalate dehydratase large subunit, alpha/beta/alpha, subdomain 2; Aconitase/3-isopropylmalate dehydratase, swivel; Aconitase/3-isopropylmalate dehydratase large subunit, alpha/beta/alpha, subdomain 1/3;	AJ	KOG0452	RNA-binding translational regulator IRP (aconitase superfamily)
P28474	Specific	cytoplasm	K00121	frmA, ADH5, adhC; S-(hydroxymethyl)glutathione dehydrogenase / alcohol dehydrogenase [EC:1.1.1.284 1.1.1.1]	mmu00010 Glycolysis / Gluconeogenesis; mmu00071 Fatty acid degradation; mmu00350 Tyrosine metabolism; mmu00830 Retinol metabolism; mmu00980 Metabolism of xenobiotics by cytochrome P450; mmu00982 Drug metabolism - cytochrome P450; mmu01100 Metabolic pathways; mmu01200 Carbon metabolism; mmu05204 Chemical carcinogenesis	GO:0045777 positive regulation of blood pressure; GO:0065008 regulation of biological quality; GO:0006066 alcohol metabolic process; GO:0044699 single-organism process; GO:0044255 cellular lipid metabolic process; GO:0044237 cellular metabolic process; GO:0009607 response to biotic stimulus; GO:0009605 response to external stimulus; GO:0051409 response to nitrosative stress; GO:0008152 metabolic …	GO:0043229 intracellular organelle; GO:0044421 extracellular region part; GO:0031982 vesicle; GO:0005737 cytoplasm; GO:0044424 intracellular part; GO:0005623 cell; GO:0005576 extracellular region; GO:0005739 mitochondrion; GO:0043231 intracellular membrane-bounded organelle; GO:0043226 organelle; GO:0070062 extracellular exosome; GO:0005622 intracellular; GO:0044464 cell part; GO:1903561 extracel…	GO:0046983 protein dimerization activity; GO:0016903 oxidoreductase activity, acting on the aldehyde or oxo group of donors; GO:0043167 ion binding; GO:0043177 organic acid binding; GO:0005515 protein binding; GO:0033293 monocarboxylic acid binding; GO:0008270 zinc ion binding; GO:0004029 aldehyde dehydrogenase (NAD) activity; GO:0051903 S-(hydroxymethyl)glutathione dehydrogenase activity; GO:001…	IPR011032; IPR016040; IPR013154; IPR013149;	GroES-like; NAD(P)-binding domain; Alcohol dehydrogenase, N-terminal; Alcohol dehydrogenase, C-terminal;	Q	KOG0022	Alcohol dehydrogenase, class III
P32020	Specific	cytoplasm	K08764	SCP2, SCPX; sterol carrier protein 2 [EC:2.3.1.176]	mmu00120 Primary bile acid biosynthesis; mmu01040 Biosynthesis of unsaturated fatty acids; mmu01100 Metabolic pathways; mmu01212 Fatty acid metabolism; mmu03320 PPAR signaling pathway; mmu04146 Peroxisome	GO:0042446 hormone biosynthetic process; GO:0042181 ketone biosynthetic process; GO:0065008 regulation of biological quality; GO:0010256 endomembrane system organization; GO:0015850 organic hydroxy compound transport; GO:0032371 regulation of sterol transport; GO:0006066 alcohol metabolic process; GO:0030301 cholesterol transport; GO:0044699 single-organism process; GO:0009058 biosynthetic proces…	GO:0016020 membrane; GO:0044421 extracellular region part; GO:0031982 vesicle; GO:0005737 cytoplasm; GO:0032991 macromolecular complex; GO:0044424 intracellular part; GO:0005623 cell; GO:0044422 organelle part; GO:0031974 membrane-enclosed lumen; GO:0070062 extracellular exosome; GO:0005654 nucleoplasm; GO:0070013 intracellular organelle lumen; GO:0005622 intracellular; GO:0044464 cell part; GO:0…	GO:0036041 long-chain fatty acid binding; GO:0032934 sterol binding; GO:0005102 receptor binding; GO:0005319 lipid transporter activity; GO:0022892 substrate-specific transporter activity; GO:0005515 protein binding; GO:0005496 steroid binding; GO:0097159 organic cyclic compound binding; GO:0016746 transferase activity, transferring acyl groups; GO:0031406 carboxylic acid binding; GO:0003824 cata…	IPR016039; IPR020616; IPR020617; IPR003033;	Thiolase-like; Thiolase, N-terminal; Thiolase, C-terminal; SCP2 sterol-binding domain;	I	KOG1406	Peroxisomal 3-ketoacyl-CoA-thiolase P-44/SCP2
P34914	Specific	extracellular	K08726	EPHX2; soluble epoxide hydrolase / lipid-phosphate phosphatase [EC:3.3.2.10 3.1.3.76]	mmu00590 Arachidonic acid metabolism; mmu01100 Metabolic pathways; mmu04146 Peroxisome	GO:0065008 regulation of biological quality; GO:0009810 stilbene metabolic process; GO:0006725 cellular aromatic compound metabolic process; GO:0060255 regulation of macromolecule metabolic process; GO:0044699 single-organism process; GO:0019218 regulation of steroid metabolic process; GO:0044255 cellular lipid metabolic process; GO:0019216 regulation of lipid metabolic process; GO:0050896 respon…	GO:0043229 intracellular organelle; GO:0044421 extracellular region part; GO:0005777 peroxisome; GO:0031982 vesicle; GO:0005737 cytoplasm; GO:0044424 intracellular part; GO:0005829 cytosol; GO:0005623 cell; GO:0005576 extracellular region; GO:0043231 intracellular membrane-bounded organelle; GO:0043226 organelle; GO:0070062 extracellular exosome; GO:0005622 intracellular; GO:0044464 cell part; GO…	GO:0000287 magnesium ion binding; GO:0016801 hydrolase activity, acting on ether bonds; GO:0015643 toxic substance binding; GO:0005102 receptor binding; GO:0016791 phosphatase activity; GO:0046983 protein dimerization activity; GO:0043167 ion binding; GO:0042577 lipid phosphatase activity; GO:0005515 protein binding; GO:0016787 hydrolase activity; GO:0033885 10-hydroxy-9-(phosphonooxy)octadecanoa…	IPR029058; IPR000073; IPR023198; IPR023214;	Alpha/Beta hydrolase fold; Alpha/beta hydrolase fold-1; Phosphoglycolate phosphatase, domain 2; HAD-like domain;	R	KOG3085	Predicted hydrolase (HAD superfamily)
P34927	Specific	plasma membrane	K10063	ASGR1; asialoglycoprotein receptor 1	mmu04918 Thyroid hormone synthesis	GO:0006810 transport; GO:0009605 response to external stimulus; GO:0009991 response to extracellular stimulus; GO:0051716 cellular response to stimulus; GO:0007154 cell communication; GO:0016192 vesicle-mediated transport; GO:0071496 cellular response to external stimulus; GO:0006898 receptor-mediated endocytosis; GO:0050896 response to stimulus; GO:0006897 endocytosis; GO:0051179 localization; G…	GO:0031224 intrinsic component of membrane; GO:0016020 membrane; GO:0016021 integral component of membrane; GO:0044425 membrane part;	GO:0060089 molecular transducer activity; GO:0004872 receptor activity; GO:0042802 identical protein binding; GO:0042803 protein homodimerization activity; GO:0005488 binding; GO:0043167 ion binding; GO:0046983 protein dimerization activity; GO:0004873 asialoglycoprotein receptor activity; GO:0046872 metal ion binding; GO:0043169 cation binding; GO:0030246 carbohydrate binding; GO:0038024 cargo r…	IPR001304; IPR016187; IPR033989; IPR005640; IPR016186;	C-type lectin-like; C-type lectin fold; CD209-like, C-type lectin-like domain; Hepatic lectin, N-terminal; C-type lectin-like/link domain;	TV	KOG4297	C-type lectin
P35564	Specific	endoplasmic reticulum	K08054	CANX; calnexin	mmu04141 Protein processing in endoplasmic reticulum; mmu04145 Phagosome; mmu04612 Antigen processing and presentation; mmu04918 Thyroid hormone synthesis; mmu05166 Human T-cell leukemia virus 1 infection	GO:0051640 organelle localization; GO:0046907 intracellular transport; GO:0061077 chaperone-mediated protein folding; GO:0044699 single-organism process; GO:0099504 synaptic vesicle cycle; GO:0051234 establishment of localization; GO:0006457 protein folding; GO:0099003 vesicle-mediated transport in synapse; GO:0051649 establishment of localization in cell; GO:0072583 clathrin-dependent endocytosi…	GO:0030425 dendrite; GO:0016020 membrane; GO:0044421 extracellular region part; GO:0099568 cytoplasmic region; GO:0005737 cytoplasm; GO:0032838 cell projection cytoplasm; GO:0043025 neuronal cell body; GO:0032991 macromolecular complex; GO:0005623 cell; GO:0044422 organelle part; GO:0043197 dendritic spine; GO:0043228 non-membrane-bounded organelle; GO:0070062 extracellular exosome; GO:0032839 de…	GO:0003723 RNA binding; GO:0034185 apolipoprotein binding; GO:0005102 receptor binding; GO:0043167 ion binding; GO:0005515 protein binding; GO:0035255 ionotropic glutamate receptor binding; GO:1901363 heterocyclic compound binding; GO:0097159 organic cyclic compound binding; GO:0035254 glutamate receptor binding; GO:0097367 carbohydrate derivative binding; GO:0005488 binding; GO:0003676 nucleic a…	IPR009033; IPR013320;	Calreticulin/calnexin, P domain; Concanavalin A-like lectin/glucanase domain;	O	KOG0675	Calnexin
P35576	Specific	plasma membrane	K01084	G6PC; glucose-6-phosphatase [EC:3.1.3.9]	mmu00010 Glycolysis / Gluconeogenesis; mmu00052 Galactose metabolism; mmu00500 Starch and sucrose metabolism; mmu01100 Metabolic pathways; mmu04068 FoxO signaling pathway; mmu04151 PI3K-Akt signaling pathway; mmu04152 AMPK signaling pathway; mmu04910 Insulin signaling pathway; mmu04920 Adipocytokine signaling pathway; mmu04922 Glucagon signaling pathway; mmu04931 Insulin resistance; mmu04973 Carb…	GO:0065008 regulation of biological quality; GO:0046486 glycerolipid metabolic process; GO:0019319 hexose biosynthetic process; GO:0042593 glucose homeostasis; GO:0044699 single-organism process; GO:0044255 cellular lipid metabolic process; GO:0009058 biosynthetic process; GO:0044237 cellular metabolic process; GO:0006796 phosphate-containing compound metabolic process; GO:0044264 cellular polysa…	GO:0043229 intracellular organelle; GO:0016020 membrane; GO:0042175 nuclear outer membrane-endoplasmic reticulum membrane network; GO:0005783 endoplasmic reticulum; GO:0044446 intracellular organelle part; GO:0005737 cytoplasm; GO:0031224 intrinsic component of membrane; GO:0012505 endomembrane system; GO:0044424 intracellular part; GO:0005623 cell; GO:0016021 integral component of membrane; GO:0…	GO:0019203 carbohydrate phosphatase activity; GO:0016773 phosphotransferase activity, alcohol group as acceptor; GO:0016791 phosphatase activity; GO:0043167 ion binding; GO:0050309 sugar-terminal-phosphatase activity; GO:0042301 phosphate ion binding; GO:0016787 hydrolase activity; GO:0004346 glucose-6-phosphatase activity; GO:0003824 catalytic activity; GO:0042578 phosphoric ester hydrolase acti…	IPR000326;	Phosphatidic acid phosphatase type 2/haloperoxidase;
P35700	Specific	cytoplasm	K13279	PRDX1; peroxiredoxin 1 [EC:1.11.1.15]	mmu04146 Peroxisome; mmu05146 Amoebiasis	GO:0006801 superoxide metabolic process; GO:0000303 response to superoxide; GO:0065008 regulation of biological quality; GO:0032872 regulation of stress-activated MAPK cascade; GO:1903533 regulation of protein targeting; GO:0002262 myeloid cell homeostasis; GO:0023051 regulation of signaling; GO:0044699 single-organism process; GO:0044237 cellular metabolic process; GO:0048871 multicellular organ…	GO:0097708 intracellular vesicle; GO:0043229 intracellular organelle; GO:0005615 extracellular space; GO:0044421 extracellular region part; GO:0031410 cytoplasmic vesicle; GO:0030054 cell junction; GO:0042470 melanosome; GO:0031982 vesicle; GO:0005737 cytoplasm; GO:0070161 anchoring junction; GO:0044424 intracellular part; GO:0005913 cell-cell adherens junction; GO:0005829 cytosol; GO:0005911 cel…	GO:0003723 RNA binding; GO:0016209 antioxidant activity; GO:0005515 protein binding; GO:0098632 protein binding involved in cell-cell adhesion; GO:0016491 oxidoreductase activity; GO:0097159 organic cyclic compound binding; GO:1901363 heterocyclic compound binding; GO:0050839 cell adhesion molecule binding; GO:0098641 cadherin binding involved in cell-cell adhesion; GO:0042802 identical protein b…	IPR019479; IPR000866; IPR013766; IPR012336;	Peroxiredoxin, C-terminal; Alkyl hydroperoxide reductase subunit C/ Thiol specific antioxidant; Thioredoxin domain; Thioredoxin-like fold;	O	KOG0852	Alkyl hydroperoxide reductase, thiol specific antioxidant and related enzymes
P38647	Specific	mitochondria	K04043	dnaK, HSPA9; molecular chaperone DnaK	mmu03018 RNA degradation; mmu05152 Tuberculosis	GO:0051093 negative regulation of developmental process; GO:0065008 regulation of biological quality; GO:0002262 myeloid cell homeostasis; GO:0048869 cellular developmental process; GO:0045637 regulation of myeloid cell differentiation; GO:0044699 single-organism process; GO:0051241 negative regulation of multicellular organismal process; GO:0051169 nuclear transport; GO:0051168 nuclear export; G…	GO:0044421 extracellular region part; GO:0030054 cell junction; GO:0031982 vesicle; GO:0005737 cytoplasm; GO:0044424 intracellular part; GO:0005623 cell; GO:0044422 organelle part; GO:0043228 non-membrane-bounded organelle; GO:0070062 extracellular exosome; GO:0031974 membrane-enclosed lumen; GO:0005925 focal adhesion; GO:0070013 intracellular organelle lumen; GO:0043209 myelin sheath; GO:0044464…	GO:0003723 RNA binding; GO:0005524 ATP binding; GO:1901265 nucleoside phosphate binding; GO:0031625 ubiquitin protein ligase binding; GO:0001882 nucleoside binding; GO:0043167 ion binding; GO:0005515 protein binding; GO:0000166 nucleotide binding; GO:1901363 heterocyclic compound binding; GO:0097159 organic cyclic compound binding; GO:0032549 ribonucleoside binding; GO:0097367 carbohydrate deriva…	IPR029048; IPR029047;	Heat shock protein 70kD, C-terminal domain; Heat shock protein 70kD, peptide-binding domain;	O	KOG0102	Molecular chaperones mortalin/PBP74/GRP75, HSP70 superfamily
P40936	Specific	cytoplasm	K00562	INMT, TEMT; methyltransferase [EC:2.1.1.49 2.1.1.96]	mmu00380 Tryptophan metabolism; mmu00450 Selenocompound metabolism; mmu01100 Metabolic pathways	GO:0008152 metabolic process; GO:0042221 response to chemical; GO:0009636 response to toxic substance; GO:0006807 nitrogen compound metabolic process; GO:0050896 response to stimulus; GO:0009987 cellular process; GO:0044237 cellular metabolic process; GO:0001887 selenium compound metabolic process; GO:0009308 amine metabolic process; GO:0032259 methylation; GO:1901564 organonitrogen compound meta…	GO:0044464 cell part; GO:0005622 intracellular; GO:0005737 cytoplasm; GO:0044424 intracellular part; GO:0005623 cell; GO:0005829 cytosol; GO:0044444 cytoplasmic part;	GO:0030748 amine N-methyltransferase activity; GO:0008757 S-adenosylmethionine-dependent methyltransferase activity; GO:0008168 methyltransferase activity; GO:0003824 catalytic activity; GO:0008172 S-methyltransferase activity; GO:0098615 dimethyl selenide methyltransferase activity; GO:0016741 transferase activity, transferring one-carbon groups; GO:0004790 thioether S-methyltransferase activity…	IPR029063;	S-adenosyl-L-methionine-dependent methyltransferase;
P42932	Specific	cytoplasm	K09500	CCT8; T-complex protein 1 subunit theta		GO:0044085 cellular component biogenesis; GO:0065008 regulation of biological quality; GO:0035036 sperm-egg recognition; GO:0022414 reproductive process; GO:0061077 chaperone-mediated protein folding; GO:0009891 positive regulation of biosynthetic process; GO:0044699 single-organism process; GO:1901998 toxin transport; GO:1904816 positive regulation of protein localization to chromosome, telomeri…	GO:0044421 extracellular region part; GO:0005874 microtubule; GO:0030054 cell junction; GO:0031982 vesicle; GO:0005737 cytoplasm; GO:0032991 macromolecular complex; GO:0099512 supramolecular fiber; GO:0044424 intracellular part; GO:0005913 cell-cell adherens junction; GO:0005911 cell-cell junction; GO:0005623 cell; GO:0099080 supramolecular complex; GO:0044422 organelle part; GO:0002199 zona pell…	GO:0005524 ATP binding; GO:1901265 nucleoside phosphate binding; GO:0001882 nucleoside binding; GO:0043167 ion binding; GO:0005515 protein binding; GO:0000166 nucleotide binding; GO:0098632 protein binding involved in cell-cell adhesion; GO:0044183 protein binding involved in protein folding; GO:0097159 organic cyclic compound binding; GO:1901363 heterocyclic compound binding; GO:0032549 ribonucl…	IPR027410; IPR027409; IPR027413;	TCP-1-like chaperonin intermediate domain; GroEL-like apical domain; GroEL-like equatorial domain;	O	KOG0362	Chaperonin complex component, TCP-1 theta subunit (CCT8)
P45952	Specific	mitochondria	K00249	ACADM, acd; acyl-CoA dehydrogenase [EC:1.3.8.7]	mmu00071 Fatty acid degradation; mmu00280 Valine, leucine and isoleucine degradation; mmu01100 Metabolic pathways; mmu01212 Fatty acid metabolism; mmu03320 PPAR signaling pathway	GO:0048732 gland development; GO:0048869 cellular developmental process; GO:0044699 single-organism process; GO:0009058 biosynthetic process; GO:0044255 cellular lipid metabolic process; GO:0045329 carnitine biosynthetic process; GO:0044237 cellular metabolic process; GO:0044264 cellular polysaccharide metabolic process; GO:0009605 response to external stimulus; GO:0008152 metabolic process; GO:0…	GO:0044421 extracellular region part; GO:0005737 cytoplasm; GO:0031982 vesicle; GO:0044424 intracellular part; GO:0016604 nuclear body; GO:0005623 cell; GO:0044422 organelle part; GO:0031974 membrane-enclosed lumen; GO:0070062 extracellular exosome; GO:0005654 nucleoplasm; GO:0070013 intracellular organelle lumen; GO:0005622 intracellular; GO:0044464 cell part; GO:0016607 nuclear speck; GO:190356…	GO:1901265 nucleoside phosphate binding; GO:0050660 flavin adenine dinucleotide binding; GO:0043167 ion binding; GO:0005515 protein binding; GO:0000166 nucleotide binding; GO:0048037 cofactor binding; GO:0016491 oxidoreductase activity; GO:1901363 heterocyclic compound binding; GO:0097159 organic cyclic compound binding; GO:0016627 oxidoreductase activity, acting on the CH-CH group of donors; GO:…	IPR013786; IPR009100; IPR006091; IPR009075;	Acyl-CoA dehydrogenase/oxidase, N-terminal; Acyl-CoA dehydrogenase/oxidase, N-terminal and middle domain; Acyl-CoA oxidase/dehydrogenase, central domain; Acyl-CoA dehydrogenase/oxidase C-terminal;	I	KOG0140	Medium-chain acyl-CoA dehydrogenase
P46978	Specific	plasma membrane	K07151	STT3; dolichyl-diphosphooligosaccharide---protein glycosyltransferase [EC:2.4.99.18]	mmu00510 N-Glycan biosynthesis; mmu00513 Various types of N-glycan biosynthesis; mmu01100 Metabolic pathways; mmu04141 Protein processing in endoplasmic reticulum	GO:0043687 post-translational protein modification; GO:0043413 macromolecule glycosylation; GO:0044267 cellular protein metabolic process; GO:0044699 single-organism process; GO:0009058 biosynthetic process; GO:0018196 peptidyl-asparagine modification; GO:0044237 cellular metabolic process; GO:0071704 organic substance metabolic process; GO:0008152 metabolic process; GO:1901137 carbohydrate deriv…	GO:0043229 intracellular organelle; GO:0016020 membrane; GO:0042175 nuclear outer membrane-endoplasmic reticulum membrane network; GO:0005783 endoplasmic reticulum; GO:0044446 intracellular organelle part; GO:0005737 cytoplasm; GO:0031224 intrinsic component of membrane; GO:0032991 macromolecular complex; GO:0012505 endomembrane system; GO:0044424 intracellular part; GO:0008250 oligosaccharyltran…	GO:0004579 dolichyl-diphosphooligosaccharide-protein glycotransferase activity; GO:0016757 transferase activity, transferring glycosyl groups; GO:0016758 transferase activity, transferring hexosyl groups; GO:0003824 catalytic activity; GO:0016740 transferase activity; GO:0004576 oligosaccharyl transferase activity;			O	KOG2292	Oligosaccharyltransferase, STT3 subunit
P47738	Specific	mitochondria	K00128	ALDH; aldehyde dehydrogenase (NAD+) [EC:1.2.1.3]	mmu00010 Glycolysis / Gluconeogenesis; mmu00053 Ascorbate and aldarate metabolism; mmu00071 Fatty acid degradation; mmu00280 Valine, leucine and isoleucine degradation; mmu00310 Lysine degradation; mmu00330 Arginine and proline metabolism; mmu00340 Histidine metabolism; mmu00380 Tryptophan metabolism; mmu00410 beta-Alanine metabolism; mmu00561 Glycerolipid metabolism; mmu00620 Pyruvate metabolism…	GO:1901615 organic hydroxy compound metabolic process; GO:0006066 alcohol metabolic process; GO:0044712 single-organism catabolic process; GO:0055114 oxidation-reduction process; GO:0044281 small molecule metabolic process; GO:0034310 primary alcohol catabolic process; GO:0044699 single-organism process; GO:0044282 small molecule catabolic process; GO:0046164 alcohol catabolic process; GO:0006068…	GO:0005759 mitochondrial matrix; GO:0043229 intracellular organelle; GO:0044421 extracellular region part; GO:0044429 mitochondrial part; GO:0005737 cytoplasm; GO:0044446 intracellular organelle part; GO:0031982 vesicle; GO:0044424 intracellular part; GO:0005623 cell; GO:0005576 extracellular region; GO:0044422 organelle part; GO:0005739 mitochondrion; GO:0043231 intracellular membrane-bounded or…	GO:0016620 oxidoreductase activity, acting on the aldehyde or oxo group of donors, NAD or NADP as acceptor; GO:0003824 catalytic activity; GO:0005488 binding; GO:0016903 oxidoreductase activity, acting on the aldehyde or oxo group of donors; GO:0005515 protein binding; GO:0016491 oxidoreductase activity; GO:0004029 aldehyde dehydrogenase (NAD) activity;	IPR016161; IPR015590; IPR016162; IPR016163;	Aldehyde/histidinol dehydrogenase; Aldehyde dehydrogenase domain; Aldehyde dehydrogenase N-terminal domain; Aldehyde dehydrogenase, C-terminal;	C	KOG2450	Aldehyde dehydrogenase
P48758	Specific	mitochondria	K00079	CBR1; carbonyl reductase 1 [EC:1.1.1.184 1.1.1.189 1.1.1.197]	mmu00590 Arachidonic acid metabolism; mmu00790 Folate biosynthesis; mmu00980 Metabolism of xenobiotics by cytochrome P450; mmu01100 Metabolic pathways; mmu05204 Chemical carcinogenesis	GO:0017144 drug metabolic process; GO:0055114 oxidation-reduction process; GO:0044281 small molecule metabolic process; GO:1901661 quinone metabolic process; GO:0042373 vitamin K metabolic process; GO:0044763 single-organism cellular process; GO:0044699 single-organism process; GO:0044237 cellular metabolic process; GO:0071704 organic substance metabolic process; GO:0051186 cofactor metabolic pro…	GO:0070062 extracellular exosome; GO:0043226 organelle; GO:0044421 extracellular region part; GO:0044464 cell part; GO:0005622 intracellular; GO:0005737 cytoplasm; GO:0031982 vesicle; GO:1903561 extracellular vesicle; GO:0044424 intracellular part; GO:0005623 cell; GO:0043227 membrane-bounded organelle; GO:0005576 extracellular region; GO:0043230 extracellular organelle;	GO:0016614 oxidoreductase activity, acting on CH-OH group of donors; GO:0016651 oxidoreductase activity, acting on NAD(P)H; GO:0016616 oxidoreductase activity, acting on the CH-OH group of donors, NAD or NADP as acceptor; GO:0003824 catalytic activity; GO:0004090 carbonyl reductase (NADPH) activity; GO:0050221 prostaglandin-E2 9-reductase activity; GO:0047021 15-hydroxyprostaglandin dehydrogenase…	IPR016040;	NAD(P)-binding domain;	Q	KOG1208	Dehydrogenases with different specificities (related to short-chain alcohol dehydrogenases)
P50136	Specific	mitochondria	K00166	BCKDHA, bkdA1; 2-oxoisovalerate dehydrogenase E1 component alpha subunit [EC:1.2.4.4]	mmu00280 Valine, leucine and isoleucine degradation; mmu00640 Propanoate metabolism; mmu01100 Metabolic pathways	GO:0055114 oxidation-reduction process; GO:0044712 single-organism catabolic process; GO:0044281 small molecule metabolic process; GO:0044763 single-organism cellular process; GO:0006807 nitrogen compound metabolic process; GO:0044699 single-organism process; GO:0044282 small molecule catabolic process; GO:0044238 primary metabolic process; GO:0044237 cellular metabolic process; GO:0071704 organi…	GO:0005759 mitochondrial matrix; GO:0043229 intracellular organelle; GO:0044429 mitochondrial part; GO:0005737 cytoplasm; GO:0044446 intracellular organelle part; GO:0032991 macromolecular complex; GO:0098798 mitochondrial protein complex; GO:0044424 intracellular part; GO:0005623 cell; GO:0005739 mitochondrion; GO:0044422 organelle part; GO:0045240 dihydrolipoyl dehydrogenase complex; GO:0031974…	GO:0003824 catalytic activity; GO:0005488 binding; GO:0043167 ion binding; GO:0016903 oxidoreductase activity, acting on the aldehyde or oxo group of donors; GO:0003863 3-methyl-2-oxobutanoate dehydrogenase (2-methylpropanoyl-transferring) activity; GO:0043169 cation binding; GO:0046872 metal ion binding; GO:0003826 alpha-ketoacid dehydrogenase activity; GO:0016624 oxidoreductase activity, acting…	IPR001017; IPR029061;	Dehydrogenase, E1 component; Thiamin diphosphate-binding fold;	C	KOG1182	Branched chain alpha-keto acid dehydrogenase complex, alpha subunit
P50171	Specific	mitochondria	K13370	HSD17B8; 17beta-estradiol 17-dehydrogenase / 3alpha(17beta)-hydroxysteroid dehydrogenase (NAD+) [EC:1.1.1.62 1.1.1.239]	mmu00061 Fatty acid biosynthesis; mmu00140 Steroid hormone biosynthesis; mmu01100 Metabolic pathways; mmu01212 Fatty acid metabolism	GO:0044085 cellular component biogenesis; GO:0042446 hormone biosynthetic process; GO:0016043 cellular component organization; GO:0065008 regulation of biological quality; GO:0016053 organic acid biosynthetic process; GO:0044699 single-organism process; GO:0009058 biosynthetic process; GO:0044255 cellular lipid metabolic process; GO:0006703 estrogen biosynthetic process; GO:0044237 cellular metab…	GO:0005759 mitochondrial matrix; GO:0043229 intracellular organelle; GO:0016020 membrane; GO:0044429 mitochondrial part; GO:0071944 cell periphery; GO:0031967 organelle envelope; GO:0005737 cytoplasm; GO:0044446 intracellular organelle part; GO:0044424 intracellular part; GO:0005623 cell; GO:0005739 mitochondrion; GO:0044422 organelle part; GO:0005886 plasma membrane; GO:0005740 mitochondrial env…	GO:1901265 nucleoside phosphate binding; GO:0033764 steroid dehydrogenase activity, acting on the CH-OH group of donors, NAD or NADP as acceptor; GO:0047025 3-oxoacyl-[acyl-carrier-protein] reductase (NADH) activity; GO:0047035 testosterone dehydrogenase (NAD+) activity; GO:0043167 ion binding; GO:0000166 nucleotide binding; GO:0004303 estradiol 17-beta-dehydrogenase activity; GO:0048037 cofactor…	IPR016040;	NAD(P)-binding domain;	I	KOG1200	Mitochondrial/plastidial beta-ketoacyl-ACP reductase
P50172	Specific	extracellular	K15680	HSD11B1; corticosteroid 11-beta-dehydrogenase isozyme 1 [EC:1.1.1.146]	mmu00140 Steroid hormone biosynthesis; mmu00980 Metabolism of xenobiotics by cytochrome P450; mmu01100 Metabolic pathways; mmu05204 Chemical carcinogenesis	GO:0030324 lung development; GO:0032502 developmental process; GO:0044707 single-multicellular organism process; GO:0035295 tube development; GO:0055114 oxidation-reduction process; GO:0048731 system development; GO:0030323 respiratory tube development; GO:0008202 steroid metabolic process; GO:1901360 organic cyclic compound metabolic process; GO:0044699 single-organism process; GO:0044238 primar…	GO:0043229 intracellular organelle; GO:0016020 membrane; GO:0042175 nuclear outer membrane-endoplasmic reticulum membrane network; GO:0005783 endoplasmic reticulum; GO:0044446 intracellular organelle part; GO:0005737 cytoplasm; GO:0031224 intrinsic component of membrane; GO:0012505 endomembrane system; GO:0044424 intracellular part; GO:0005623 cell; GO:0016021 integral component of membrane; GO:0…	GO:0016229 steroid dehydrogenase activity; GO:0016614 oxidoreductase activity, acting on CH-OH group of donors; GO:0016616 oxidoreductase activity, acting on the CH-OH group of donors, NAD or NADP as acceptor; GO:0033764 steroid dehydrogenase activity, acting on the CH-OH group of donors, NAD or NADP as acceptor; GO:0070524 11-beta-hydroxysteroid dehydrogenase (NADP+) activity; GO:0003824 catalyt…	IPR016040;	NAD(P)-binding domain;	Q	KOG1205	Predicted dehydrogenase
P50247	Specific	cytoplasm	K01251	E3.3.1.1, ahcY; adenosylhomocysteinase [EC:3.3.1.1]	mmu00270 Cysteine and methionine metabolism; mmu01100 Metabolic pathways	GO:1901606 alpha-amino acid catabolic process; GO:0009116 nucleoside metabolic process; GO:0042278 purine nucleoside metabolic process; GO:0046498 S-adenosylhomocysteine metabolic process; GO:0044699 single-organism process; GO:0044237 cellular metabolic process; GO:0000096 sulfur amino acid metabolic process; GO:0008152 metabolic process; GO:0006520 cellular amino acid metabolic process; GO:0046…	GO:0097708 intracellular vesicle; GO:0043229 intracellular organelle; GO:0044421 extracellular region part; GO:0031410 cytoplasmic vesicle; GO:0042470 melanosome; GO:0005737 cytoplasm; GO:0031982 vesicle; GO:0044424 intracellular part; GO:0005829 cytosol; GO:0005623 cell; GO:0005576 extracellular region; GO:0048770 pigment granule; GO:0043226 organelle; GO:0070062 extracellular exosome; GO:000562…	GO:0016801 hydrolase activity, acting on ether bonds; GO:1901265 nucleoside phosphate binding; GO:0043621 protein self-association; GO:0043167 ion binding; GO:0005515 protein binding; GO:0016787 hydrolase activity; GO:0005507 copper ion binding; GO:0000166 nucleotide binding; GO:0048037 cofactor binding; GO:0004013 adenosylhomocysteinase activity; GO:1901363 heterocyclic compound binding; GO:0097…	IPR016040; IPR015878;	NAD(P)-binding domain; S-adenosyl-L-homocysteine hydrolase, NAD binding domain;	H	KOG1370	S-adenosylhomocysteine hydrolase
P50285	Specific	peroxisome	K00485	FMO; dimethylaniline monooxygenase (N-oxide forming) [EC:1.14.13.8]	mmu00982 Drug metabolism - cytochrome P450	GO:0006739 NADP metabolic process; GO:0019362 pyridine nucleotide metabolic process; GO:0006725 cellular aromatic compound metabolic process; GO:0046496 nicotinamide nucleotide metabolic process; GO:0009628 response to abiotic stimulus; GO:0009117 nucleotide metabolic process; GO:1901700 response to oxygen-containing compound; GO:0044699 single-organism process; GO:0043207 response to external bi…	GO:0043229 intracellular organelle; GO:0016020 membrane; GO:0042175 nuclear outer membrane-endoplasmic reticulum membrane network; GO:0005783 endoplasmic reticulum; GO:0031090 organelle membrane; GO:0044446 intracellular organelle part; GO:0005737 cytoplasm; GO:0031224 intrinsic component of membrane; GO:0012505 endomembrane system; GO:0044424 intracellular part; GO:0005623 cell; GO:0016021 integ…	GO:0016709 oxidoreductase activity, acting on paired donors, with incorporation or reduction of molecular oxygen, NAD(P)H as one donor, and incorporation of one atom of oxygen; GO:1901265 nucleoside phosphate binding; GO:0050660 flavin adenine dinucleotide binding; GO:0043167 ion binding; GO:0016705 oxidoreductase activity, acting on paired donors, with incorporation or reduction of molecular oxy…	IPR016040; IPR023753;	NAD(P)-binding domain; FAD/NAD(P)-binding domain;	Q	KOG1399	Flavin-containing monooxygenase
P50544	Specific	mitochondria	K09479	ACADVL; very long chain acyl-CoA dehydrogenase [EC:1.3.8.9]	mmu00071 Fatty acid degradation; mmu01100 Metabolic pathways; mmu01212 Fatty acid metabolism	GO:0065008 regulation of biological quality; GO:0048869 cellular developmental process; GO:0044699 single-organism process; GO:0044255 cellular lipid metabolic process; GO:0019216 regulation of lipid metabolic process; GO:0044237 cellular metabolic process; GO:0048871 multicellular organismal homeostasis; GO:0008152 metabolic process; GO:0030258 lipid modification; GO:0032787 monocarboxylic acid …	GO:0016020 membrane; GO:0031090 organelle membrane; GO:0005737 cytoplasm; GO:0044424 intracellular part; GO:0005623 cell; GO:0044422 organelle part; GO:0043228 non-membrane-bounded organelle; GO:0005740 mitochondrial envelope; GO:0031974 membrane-enclosed lumen; GO:0070013 intracellular organelle lumen; GO:0005622 intracellular; GO:0044464 cell part; GO:0019866 organelle inner membrane; GO:004322…	GO:1901265 nucleoside phosphate binding; GO:0050660 flavin adenine dinucleotide binding; GO:0043167 ion binding; GO:0000166 nucleotide binding; GO:0048037 cofactor binding; GO:0016491 oxidoreductase activity; GO:1901363 heterocyclic compound binding; GO:0097159 organic cyclic compound binding; GO:0016627 oxidoreductase activity, acting on the CH-CH group of donors; GO:0003824 catalytic activity; …	IPR009100; IPR013786; IPR006091; IPR009075;	Acyl-CoA dehydrogenase/oxidase, N-terminal and middle domain; Acyl-CoA dehydrogenase/oxidase, N-terminal; Acyl-CoA oxidase/dehydrogenase, central domain; Acyl-CoA dehydrogenase/oxidase C-terminal;	I	KOG0137	Very-long-chain acyl-CoA dehydrogenase
P51174	Specific	mitochondria	K00255	ACADL; long-chain-acyl-CoA dehydrogenase [EC:1.3.8.8]	mmu00071 Fatty acid degradation; mmu01100 Metabolic pathways; mmu01212 Fatty acid metabolism; mmu03320 PPAR signaling pathway	GO:0065008 regulation of biological quality; GO:0044699 single-organism process; GO:0044255 cellular lipid metabolic process; GO:0006579 amino-acid betaine catabolic process; GO:0019216 regulation of lipid metabolic process; GO:0044237 cellular metabolic process; GO:0048871 multicellular organismal homeostasis; GO:0008152 metabolic process; GO:0030258 lipid modification; GO:0042758 long-chain fat…	GO:0005759 mitochondrial matrix; GO:0043229 intracellular organelle; GO:0044429 mitochondrial part; GO:0005737 cytoplasm; GO:0044446 intracellular organelle part; GO:0044424 intracellular part; GO:0005623 cell; GO:0005739 mitochondrion; GO:0044422 organelle part; GO:0031974 membrane-enclosed lumen; GO:0043226 organelle; GO:0043231 intracellular membrane-bounded organelle; GO:0070013 intracellular…	GO:0016634 oxidoreductase activity, acting on the CH-CH group of donors, oxygen as acceptor; GO:1901265 nucleoside phosphate binding; GO:0050660 flavin adenine dinucleotide binding; GO:0043167 ion binding; GO:0003997 acyl-CoA oxidase activity; GO:0000166 nucleotide binding; GO:0016401 palmitoyl-CoA oxidase activity; GO:0048037 cofactor binding; GO:0016491 oxidoreductase activity; GO:1901363 heter…	IPR009100; IPR013786; IPR006091; IPR009075;	Acyl-CoA dehydrogenase/oxidase, N-terminal and middle domain; Acyl-CoA dehydrogenase/oxidase, N-terminal; Acyl-CoA oxidase/dehydrogenase, central domain; Acyl-CoA dehydrogenase/oxidase C-terminal;	EI	KOG0141	Isovaleryl-CoA dehydrogenase
P51410	Specific	cytoplasm	K02940	RP-L9e, RPL9; large subunit ribosomal protein L9e	mmu03010 Ribosome	GO:0006518 peptide metabolic process; GO:0043043 peptide biosynthetic process; GO:0044267 cellular protein metabolic process; GO:0006807 nitrogen compound metabolic process; GO:0009058 biosynthetic process; GO:0043603 cellular amide metabolic process; GO:0044238 primary metabolic process; GO:1901566 organonitrogen compound biosynthetic process; GO:1901576 organic substance biosynthetic process; G…	GO:0016020 membrane; GO:0044421 extracellular region part; GO:0030054 cell junction; GO:0005737 cytoplasm; GO:0032991 macromolecular complex; GO:0044424 intracellular part; GO:0005623 cell; GO:0044422 organelle part; GO:0043228 non-membrane-bounded organelle; GO:0005925 focal adhesion; GO:0044391 ribosomal subunit; GO:0005622 intracellular; GO:0044464 cell part; GO:0005912 adherens junction; GO:0…	GO:0097159 organic cyclic compound binding; GO:1901363 heterocyclic compound binding; GO:0003723 RNA binding; GO:0005488 binding; GO:0003676 nucleic acid binding; GO:0005198 structural molecule activity; GO:0003735 structural constituent of ribosome; GO:0019843 rRNA binding;	IPR020040;	Ribosomal protein L6, alpha-beta domain;	J	KOG3255	60S ribosomal protein L9
P51658	Specific	plasma membrane	K13368	HSD17B2; 17beta-estradiol 17-dehydrogenase / 3alpha(17beta)-hydroxysteroid dehydrogenase (NAD+) [EC:1.1.1.62 1.1.1.239]	mmu00140 Steroid hormone biosynthesis; mmu01100 Metabolic pathways; mmu04913 Ovarian steroidogenesis	GO:0000003 reproduction; GO:0044707 single-multicellular organism process; GO:0001101 response to acid chemical; GO:0001890 placenta development; GO:0022414 reproductive process; GO:0043009 chordate embryonic development; GO:1901700 response to oxygen-containing compound; GO:0044699 single-organism process; GO:0009058 biosynthetic process; GO:0050896 response to stimulus; GO:0071704 organic subst…	GO:0031224 intrinsic component of membrane; GO:0016020 membrane; GO:0016021 integral component of membrane; GO:0044425 membrane part;	GO:0016229 steroid dehydrogenase activity; GO:0016614 oxidoreductase activity, acting on CH-OH group of donors; GO:0016616 oxidoreductase activity, acting on the CH-OH group of donors, NAD or NADP as acceptor; GO:0004303 estradiol 17-beta-dehydrogenase activity; GO:0033764 steroid dehydrogenase activity, acting on the CH-OH group of donors, NAD or NADP as acceptor; GO:0047035 testosterone dehydro…	IPR016040;	NAD(P)-binding domain;	QR	KOG1610	Corticosteroid 11-beta-dehydrogenase and related short chain-type dehydrogenases
P52196	Specific	mitochondria	K01011	TST, MPST, sseA; thiosulfate/3-mercaptopyruvate sulfurtransferase [EC:2.8.1.1 2.8.1.2]	mmu00270 Cysteine and methionine metabolism; mmu00920 Sulfur metabolism; mmu01100 Metabolic pathways; mmu04122 Sulfur relay system	GO:0032502 developmental process; GO:0050658 RNA transport; GO:0060429 epithelium development; GO:0009888 tissue development; GO:0051029 rRNA transport; GO:0006403 RNA localization; GO:0048869 cellular developmental process; GO:0006839 mitochondrial transport; GO:0044763 single-organism cellular process; GO:0044699 single-organism process; GO:0071702 organic substance transport; GO:0051236 establ…	GO:0016020 membrane; GO:0005615 extracellular space; GO:0044421 extracellular region part; GO:0031090 organelle membrane; GO:0005737 cytoplasm; GO:0031982 vesicle; GO:0044424 intracellular part; GO:0005623 cell; GO:0044422 organelle part; GO:0005740 mitochondrial envelope; GO:0031974 membrane-enclosed lumen; GO:0070062 extracellular exosome; GO:0070013 intracellular organelle lumen; GO:0005622 in…	GO:0097159 organic cyclic compound binding; GO:1901363 heterocyclic compound binding; GO:0003723 RNA binding; GO:0003824 catalytic activity; GO:0008097 5S rRNA binding; GO:0005488 binding; GO:0003676 nucleic acid binding; GO:0004792 thiosulfate sulfurtransferase activity; GO:0016782 transferase activity, transferring sulfur-containing groups; GO:0016783 sulfurtransferase activity; GO:0016740 tran…	IPR001763;	Rhodanese-like domain;	V	KOG1529	Mercaptopyruvate sulfurtransferase/thiosulfate sulfurtransferase
P52840	Specific	cytoplasm	K01014	SULT1A; aryl sulfotransferase [EC:2.8.2.1]	mmu05204 Chemical carcinogenesis	GO:0006790 sulfur compound metabolic process; GO:0008152 metabolic process; GO:0044710 single-organism metabolic process; GO:0008202 steroid metabolic process; GO:1901360 organic cyclic compound metabolic process; GO:0044699 single-organism process; GO:0051923 sulfation; GO:0044238 primary metabolic process; GO:0044237 cellular metabolic process; GO:0009987 cellular process; GO:0006629 lipid meta…	GO:0044424 intracellular part; GO:0005623 cell; GO:0044464 cell part; GO:0005622 intracellular; GO:0005737 cytoplasm;	GO:0097159 organic cyclic compound binding; GO:1901363 heterocyclic compound binding; GO:0008146 sulfotransferase activity; GO:1901265 nucleoside phosphate binding; GO:0003824 catalytic activity; GO:0005488 binding; GO:0004062 aryl sulfotransferase activity; GO:0000166 nucleotide binding; GO:0016782 transferase activity, transferring sulfur-containing groups; GO:0016740 transferase activity; GO:0…	IPR000863; IPR027417;	Sulfotransferase domain; P-loop containing nucleoside triphosphate hydrolase;	R	KOG1584	Sulfotransferase
P53026	Specific	cytoplasm,nucleus	K02865	RP-L10Ae, RPL10A; large subunit ribosomal protein L10Ae	mmu03010 Ribosome	GO:0044085 cellular component biogenesis; GO:0022613 ribonucleoprotein complex biogenesis; GO:0006518 peptide metabolic process; GO:0006725 cellular aromatic compound metabolic process; GO:0044267 cellular protein metabolic process; GO:0009058 biosynthetic process; GO:1901566 organonitrogen compound biosynthetic process; GO:0044237 cellular metabolic process; GO:0042273 ribosomal large subunit bi…	GO:0016020 membrane; GO:0044421 extracellular region part; GO:0030054 cell junction; GO:0005737 cytoplasm; GO:0031982 vesicle; GO:0032991 macromolecular complex; GO:0044424 intracellular part; GO:0005623 cell; GO:0044422 organelle part; GO:0043228 non-membrane-bounded organelle; GO:0070062 extracellular exosome; GO:0005925 focal adhesion; GO:0044391 ribosomal subunit; GO:0005622 intracellular; GO…	GO:0097159 organic cyclic compound binding; GO:1901363 heterocyclic compound binding; GO:0003723 RNA binding; GO:0005488 binding; GO:0003676 nucleic acid binding; GO:0005198 structural molecule activity; GO:0003735 structural constituent of ribosome;	IPR023674; IPR016095; IPR016094;	Ribosomal protein L1-like; Ribosomal protein L1, 3-layer alpha/beta-sandwich; Ribosomal protein L1, 2-layer alpha/beta-sandwich;	J	KOG1570	60S ribosomal protein L10A
P53657	Specific	cytoplasm	K12406	PKLR; pyruvate kinase isozymes R/L [EC:2.7.1.40]	mmu00010 Glycolysis / Gluconeogenesis; mmu00230 Purine metabolism; mmu00620 Pyruvate metabolism; mmu01100 Metabolic pathways; mmu01200 Carbon metabolism; mmu01230 Biosynthesis of amino acids; mmu04910 Insulin signaling pathway; mmu04930 Type II diabetes mellitus; mmu04932 Non-alcoholic fatty liver disease (NAFLD); mmu04950 Maturity onset diabetes of the young	GO:0006757 ATP generation from ADP; GO:0009116 nucleoside metabolic process; GO:0042278 purine nucleoside metabolic process; GO:0006165 nucleoside diphosphate phosphorylation; GO:0046031 ADP metabolic process; GO:0019362 pyridine nucleotide metabolic process; GO:0006096 glycolytic process; GO:0009167 purine ribonucleoside monophosphate metabolic process; GO:0009117 nucleotide metabolic process; G…	GO:0044421 extracellular region part; GO:0031982 vesicle; GO:0005737 cytoplasm; GO:0044424 intracellular part; GO:0005623 cell; GO:0005829 cytosol; GO:0005576 extracellular region; GO:0043226 organelle; GO:0070062 extracellular exosome; GO:0005622 intracellular; GO:0044464 cell part; GO:1903561 extracellular vesicle; GO:0043227 membrane-bounded organelle; GO:0043230 extracellular organelle; GO:00…	GO:0000287 magnesium ion binding; GO:0004743 pyruvate kinase activity; GO:0005524 ATP binding; GO:1901265 nucleoside phosphate binding; GO:0016773 phosphotransferase activity, alcohol group as acceptor; GO:0001882 nucleoside binding; GO:0043167 ion binding; GO:0030955 potassium ion binding; GO:0000166 nucleotide binding; GO:0097159 organic cyclic compound binding; GO:1901363 heterocyclic compound…	IPR015813; IPR011037; IPR015794; IPR015806; IPR015795; IPR015793;	Pyruvate/Phosphoenolpyruvate kinase-like domain; Pyruvate kinase-like, insert domain; Pyruvate kinase, alpha/beta; Pyruvate kinase, beta-barrel insert domain; Pyruvate kinase, C-terminal; Pyruvate kinase, barrel;	G	KOG2323	Pyruvate kinase
P54071	Specific	mitochondria	K00031	IDH1, IDH2, icd; isocitrate dehydrogenase [EC:1.1.1.42]	mmu00020 Citrate cycle (TCA cycle); mmu00480 Glutathione metabolism; mmu01100 Metabolic pathways; mmu01200 Carbon metabolism; mmu01210 2-Oxocarboxylic acid metabolism; mmu01230 Biosynthesis of amino acids; mmu04146 Peroxisome	GO:1903975 regulation of glial cell migration; GO:0019362 pyridine nucleotide metabolic process; GO:0014013 regulation of gliogenesis; GO:1904464 regulation of matrix metallopeptidase secretion; GO:0044237 cellular metabolic process; GO:0008285 negative regulation of cell proliferation; GO:0072525 pyridine-containing compound biosynthetic process; GO:0008152 metabolic process; GO:0006091 generati…	GO:0016020 membrane; GO:0044421 extracellular region part; GO:0031090 organelle membrane; GO:0031982 vesicle; GO:0005737 cytoplasm; GO:0044424 intracellular part; GO:0005623 cell; GO:0044422 organelle part; GO:0005740 mitochondrial envelope; GO:0070062 extracellular exosome; GO:0005622 intracellular; GO:0044464 cell part; GO:0042579 microbody; GO:0019866 organelle inner membrane; GO:1903561 extra…	GO:0000287 magnesium ion binding; GO:1901265 nucleoside phosphate binding; GO:0043167 ion binding; GO:0004448 isocitrate dehydrogenase activity; GO:0000166 nucleotide binding; GO:0048037 cofactor binding; GO:0016491 oxidoreductase activity; GO:0016614 oxidoreductase activity, acting on CH-OH group of donors; GO:1901363 heterocyclic compound binding; GO:0097159 organic cyclic compound binding; GO:…	IPR024084;	Isopropylmalate dehydrogenase-like domain;	C	KOG1526	NADP-dependent isocitrate dehydrogenase
P55096	Specific	mitochondria	K05677	ABCD3, PMP70; ATP-binding cassette, subfamily D (ALD), member 3	mmu02010 ABC transporters; mmu04146 Peroxisome	GO:0016053 organic acid biosynthetic process; GO:0044699 single-organism process; GO:0009058 biosynthetic process; GO:0044255 cellular lipid metabolic process; GO:0044237 cellular metabolic process; GO:0008610 lipid biosynthetic process; GO:0051234 establishment of localization; GO:0008152 metabolic process; GO:0015718 monocarboxylic acid transport; GO:0030258 lipid modification; GO:0032787 monoc…	GO:0016020 membrane; GO:0031090 organelle membrane; GO:0005737 cytoplasm; GO:0044438 microbody part; GO:0031224 intrinsic component of membrane; GO:0044424 intracellular part; GO:0005623 cell; GO:0044422 organelle part; GO:0005778 peroxisomal membrane; GO:0005740 mitochondrial envelope; GO:0031974 membrane-enclosed lumen; GO:0070013 intracellular organelle lumen; GO:0005782 peroxisomal matrix; GO…	GO:1901265 nucleoside phosphate binding; GO:0043621 protein self-association; GO:0015399 primary active transmembrane transporter activity; GO:0046983 protein dimerization activity; GO:0005319 lipid transporter activity; GO:0016817 hydrolase activity, acting on acid anhydrides; GO:0022892 substrate-specific transporter activity; GO:0016787 hydrolase activity; GO:0005515 protein binding; GO:001688…	IPR003593; IPR003439; IPR027417; IPR011527;	AAA+ ATPase domain; ABC transporter-like; P-loop containing nucleoside triphosphate hydrolase; ABC transporter type 1, transmembrane domain;	IR	KOG0060	Long-chain acyl-CoA transporter, ABC superfamily (involved in peroxisome organization and biogenesis)
P56593	Specific	endoplasmic reticulum	K07411	CYP2A; cytochrome P450 family 2 subfamily A [EC:1.14.14.1]	mmu00830 Retinol metabolism; mmu01100 Metabolic pathways	GO:0033559 unsaturated fatty acid metabolic process; GO:0019369 arachidonic acid metabolic process; GO:0055114 oxidation-reduction process; GO:0044281 small molecule metabolic process; GO:0044763 single-organism cellular process; GO:1901568 fatty acid derivative metabolic process; GO:0044699 single-organism process; GO:0044255 cellular lipid metabolic process; GO:0006631 fatty acid metabolic proc…	GO:0016020 membrane; GO:0043229 intracellular organelle; GO:0042175 nuclear outer membrane-endoplasmic reticulum membrane network; GO:0005783 endoplasmic reticulum; GO:0031090 organelle membrane; GO:0044446 intracellular organelle part; GO:0005737 cytoplasm; GO:0012505 endomembrane system; GO:0044424 intracellular part; GO:0005623 cell; GO:0044422 organelle part; GO:0043226 organelle; GO:0043231 …	GO:0008391 arachidonic acid monooxygenase activity; GO:0005506 iron ion binding; GO:0008392 arachidonic acid epoxygenase activity; GO:0043167 ion binding; GO:0016705 oxidoreductase activity, acting on paired donors, with incorporation or reduction of molecular oxygen; GO:0016491 oxidoreductase activity; GO:1901363 heterocyclic compound binding; GO:0097159 organic cyclic compound binding; GO:00200…			Q	KOG0156	Cytochrome P450 CYP2 subfamily
P56657	Specific	endoplasmic reticulum	K07413	CYP2C; cytochrome P450 family 2 subfamily C [EC:1.14.14.1]	mmu00140 Steroid hormone biosynthesis; mmu00590 Arachidonic acid metabolism; mmu00591 Linoleic acid metabolism; mmu00830 Retinol metabolism; mmu01100 Metabolic pathways; mmu04726 Serotonergic synapse; mmu04750 Inflammatory mediator regulation of TRP channels; mmu05204 Chemical carcinogenesis	GO:0033559 unsaturated fatty acid metabolic process; GO:0019369 arachidonic acid metabolic process; GO:0055114 oxidation-reduction process; GO:0044281 small molecule metabolic process; GO:0044763 single-organism cellular process; GO:1901568 fatty acid derivative metabolic process; GO:0044699 single-organism process; GO:0044255 cellular lipid metabolic process; GO:0006631 fatty acid metabolic proc…	GO:0016020 membrane; GO:0043229 intracellular organelle; GO:0042175 nuclear outer membrane-endoplasmic reticulum membrane network; GO:0005783 endoplasmic reticulum; GO:0031090 organelle membrane; GO:0044446 intracellular organelle part; GO:0005737 cytoplasm; GO:0012505 endomembrane system; GO:0044424 intracellular part; GO:0005623 cell; GO:0044422 organelle part; GO:0043226 organelle; GO:0043231 …	GO:0008391 arachidonic acid monooxygenase activity; GO:0005506 iron ion binding; GO:0008392 arachidonic acid epoxygenase activity; GO:0043167 ion binding; GO:0016705 oxidoreductase activity, acting on paired donors, with incorporation or reduction of molecular oxygen; GO:0016491 oxidoreductase activity; GO:1901363 heterocyclic compound binding; GO:0097159 organic cyclic compound binding; GO:00200…			Q	KOG0156	Cytochrome P450 CYP2 subfamily
P57776	Specific	cytoplasm	K15410	EEF1D; elongation factor 1-delta		GO:0044700 single organism signaling; GO:0010941 regulation of cell death; GO:0006518 peptide metabolic process; GO:0097659 nucleic acid-templated transcription; GO:0023051 regulation of signaling; GO:1902533 positive regulation of intracellular signal transduction; GO:0044699 single-organism process; GO:0009058 biosynthetic process; GO:0044237 cellular metabolic process; GO:0022610 biological ad…	GO:0030054 cell junction; GO:0005737 cytoplasm; GO:0032991 macromolecular complex; GO:0044424 intracellular part; GO:0005913 cell-cell adherens junction; GO:0005623 cell; GO:0005911 cell-cell junction; GO:0044422 organelle part; GO:0043228 non-membrane-bounded organelle; GO:0031974 membrane-enclosed lumen; GO:0070013 intracellular organelle lumen; GO:0005622 intracellular; GO:0044464 cell part; G…	GO:0003723 RNA binding; GO:0003677 DNA binding; GO:0031072 heat shock protein binding; GO:0003746 translation elongation factor activity; GO:0005515 protein binding; GO:0098632 protein binding involved in cell-cell adhesion; GO:0004871 signal transducer activity; GO:0033613 activating transcription factor binding; GO:1901363 heterocyclic compound binding; GO:0097159 organic cyclic compound bindin…	IPR014717; IPR014038; IPR018940;	Translation elongation factor EF1B/ribosomal protein S6; Translation elongation factor EF1B, beta/delta subunit, guanine nucleotide exchange domain; Elongation factor 1 beta central acidic region, eukaryote;	K	KOG1668	Elongation factor 1 beta/delta chain
P61027	Specific	cytoplasm	K07903	RAB10; Ras-related protein Rab-10	mmu04144 Endocytosis; mmu04152 AMPK signaling pathway	GO:0044700 single organism signaling; GO:0001738 morphogenesis of a polarized epithelium; GO:0090002 establishment of protein localization to plasma membrane; GO:0032989 cellular component morphogenesis; GO:0015031 protein transport; GO:0022610 biological adhesion; GO:0070972 protein localization to endoplasmic reticulum; GO:0009719 response to endogenous stimulus; GO:0007155 cell adhesion; GO:00…	GO:0016020 membrane; GO:0044421 extracellular region part; GO:0031090 organelle membrane; GO:0005737 cytoplasm; GO:0044433 cytoplasmic vesicle part; GO:0005913 cell-cell adherens junction; GO:0005623 cell; GO:0044422 organelle part; GO:0070062 extracellular exosome; GO:0098827 endoplasmic reticulum subcompartment; GO:0005925 focal adhesion; GO:0005622 intracellular; GO:0099503 secretory vesicle; …	GO:1901265 nucleoside phosphate binding; GO:0016817 hydrolase activity, acting on acid anhydrides; GO:0016787 hydrolase activity; GO:0005515 protein binding; GO:0031489 myosin V binding; GO:0097159 organic cyclic compound binding; GO:1901363 heterocyclic compound binding; GO:0098641 cadherin binding involved in cell-cell adhesion; GO:0016462 pyrophosphatase activity; GO:0019003 GDP binding; GO:00…	IPR005225; IPR027417;	Small GTP-binding protein domain; P-loop containing nucleoside triphosphate hydrolase;	TU	KOG0078	GTP-binding protein SEC4, small G protein superfamily, and related Ras family GTP-binding proteins
P62082	Specific	cytoplasm	K02993	RP-S7e, RPS7; small subunit ribosomal protein S7e	mmu03010 Ribosome	GO:0001841 neural tube formation; GO:0044085 cellular component biogenesis; GO:0022613 ribonucleoprotein complex biogenesis; GO:0006518 peptide metabolic process; GO:0035148 tube formation; GO:0043009 chordate embryonic development; GO:0048869 cellular developmental process; GO:0044699 single-organism process; GO:0009058 biosynthetic process; GO:0044237 cellular metabolic process; GO:0048729 tiss…	GO:0016020 membrane; GO:0044421 extracellular region part; GO:0030054 cell junction; GO:0015935 small ribosomal subunit; GO:0031982 vesicle; GO:0005737 cytoplasm; GO:0032991 macromolecular complex; GO:0044424 intracellular part; GO:0005623 cell; GO:0044422 organelle part; GO:0043228 non-membrane-bounded organelle; GO:0005856 cytoskeleton; GO:0070062 extracellular exosome; GO:0031974 membrane-encl…	GO:0097159 organic cyclic compound binding; GO:1901363 heterocyclic compound binding; GO:0003723 RNA binding; GO:0008187 poly-pyrimidine tract binding; GO:0005488 binding; GO:0003676 nucleic acid binding; GO:0008266 poly(U) RNA binding; GO:0005198 structural molecule activity; GO:0003735 structural constituent of ribosome; GO:0003727 single-stranded RNA binding;			J	KOG3320	40S ribosomal protein S7
P62192	Specific	cytoplasm,nucleus	K03062	PSMC1, RPT2; 26S proteasome regulatory subunit T2	mmu03050 Proteasome; mmu05165 Human papillomavirus infection; mmu05169 Epstein-Barr virus infection; mmu05203 Viral carcinogenesis	GO:0060260 regulation of transcription initiation from RNA polymerase II promoter; GO:0010941 regulation of cell death; GO:0032270 positive regulation of cellular protein metabolic process; GO:0031331 positive regulation of cellular catabolic process; GO:0009891 positive regulation of biosynthetic process; GO:0044699 single-organism process; GO:0036503 ERAD pathway; GO:0044237 cellular metabolic …	GO:0016020 membrane; GO:0005838 proteasome regulatory particle; GO:0005737 cytoplasm; GO:0032991 macromolecular complex; GO:0044424 intracellular part; GO:0005623 cell; GO:0044422 organelle part; GO:1905369 endopeptidase complex; GO:0031974 membrane-enclosed lumen; GO:0005654 nucleoplasm; GO:1902494 catalytic complex; GO:0070013 intracellular organelle lumen; GO:0022624 proteasome accessory compl…	GO:1901265 nucleoside phosphate binding; GO:0016817 hydrolase activity, acting on acid anhydrides; GO:0005515 protein binding; GO:0016787 hydrolase activity; GO:0016887 ATPase activity; GO:1901363 heterocyclic compound binding; GO:0097159 organic cyclic compound binding; GO:0016462 pyrophosphatase activity; GO:0003824 catalytic activity; GO:0032553 ribonucleotide binding; GO:0005488 binding; GO:0…	IPR003593; IPR003959; IPR027417;	AAA+ ATPase domain; ATPase, AAA-type, core; P-loop containing nucleoside triphosphate hydrolase;	O	KOG0726	26S proteasome regulatory complex, ATPase RPT2
P62196	Specific	cytoplasm	K03066	PSMC5, RPT6; 26S proteasome regulatory subunit T6	mmu03050 Proteasome; mmu05169 Epstein-Barr virus infection	GO:0060260 regulation of transcription initiation from RNA polymerase II promoter; GO:0032270 positive regulation of cellular protein metabolic process; GO:0031331 positive regulation of cellular catabolic process; GO:0023051 regulation of signaling; GO:0009891 positive regulation of biosynthetic process; GO:0044699 single-organism process; GO:0036503 ERAD pathway; GO:0044237 cellular metabolic p…	GO:0016020 membrane; GO:0005615 extracellular space; GO:0044421 extracellular region part; GO:0061695 transferase complex, transferring phosphorus-containing groups; GO:0031410 cytoplasmic vesicle; GO:0005838 proteasome regulatory particle; GO:0005737 cytoplasm; GO:0031982 vesicle; GO:0032991 macromolecular complex; GO:0044424 intracellular part; GO:1902554 serine/threonine protein kinase complex…	GO:1901265 nucleoside phosphate binding; GO:0005102 receptor binding; GO:0016817 hydrolase activity, acting on acid anhydrides; GO:0005515 protein binding; GO:0016787 hydrolase activity; GO:0051427 hormone receptor binding; GO:0016887 ATPase activity; GO:0097159 organic cyclic compound binding; GO:1901363 heterocyclic compound binding; GO:0016462 pyrophosphatase activity; GO:0003824 catalytic act…	IPR003593; IPR003959; IPR027417;	AAA+ ATPase domain; ATPase, AAA-type, core; P-loop containing nucleoside triphosphate hydrolase;	O	KOG0728	26S proteasome regulatory complex, ATPase RPT6
P62827	Specific	cytoplasm	K07936	RAN; GTP-binding nuclear protein Ran	mmu03008 Ribosome biogenesis in eukaryotes; mmu03013 RNA transport; mmu05166 Human T-cell leukemia virus 1 infection	GO:0044700 single organism signaling; GO:0050658 RNA transport; GO:0044085 cellular component biogenesis; GO:0022613 ribonucleoprotein complex biogenesis; GO:0021766 hippocampus development; GO:0022414 reproductive process; GO:0007420 brain development; GO:0071384 cellular response to corticosteroid stimulus; GO:0051169 nuclear transport; GO:0071428 rRNA-containing ribonucleoprotein complex expor…	GO:0016020 membrane; GO:0044421 extracellular region part; GO:0044450 microtubule organizing center part; GO:0005737 cytoplasm; GO:0032991 macromolecular complex; GO:0097729 9+2 motile cilium; GO:0005913 cell-cell adherens junction; GO:0005623 cell; GO:0002177 manchette; GO:0044422 organelle part; GO:0043228 non-membrane-bounded organelle; GO:0070062 extracellular exosome; GO:0005654 nucleoplasm;…	GO:1901265 nucleoside phosphate binding; GO:0016817 hydrolase activity, acting on acid anhydrides; GO:0022892 substrate-specific transporter activity; GO:0008320 protein transmembrane transporter activity; GO:0016787 hydrolase activity; GO:0005515 protein binding; GO:0022891 substrate-specific transmembrane transporter activity; GO:1901363 heterocyclic compound binding; GO:0097159 organic cyclic …	IPR005225; IPR027417;	Small GTP-binding protein domain; P-loop containing nucleoside triphosphate hydrolase;	U	KOG0096	GTPase Ran/TC4/GSP1 (nuclear protein transport pathway), small G protein superfamily
P62843	Specific	cytoplasm	K02958	RP-S15e, RPS15; small subunit ribosomal protein S15e	mmu03010 Ribosome	GO:0050658 RNA transport; GO:0044085 cellular component biogenesis; GO:0001649 osteoblast differentiation; GO:0022613 ribonucleoprotein complex biogenesis; GO:0006518 peptide metabolic process; GO:0022618 ribonucleoprotein complex assembly; GO:0048869 cellular developmental process; GO:0033753 establishment of ribosome localization; GO:0044699 single-organism process; GO:0009058 biosynthetic proc…	GO:0005840 ribosome; GO:0043229 intracellular organelle; GO:0016020 membrane; GO:0043232 intracellular non-membrane-bounded organelle; GO:0030054 cell junction; GO:0015935 small ribosomal subunit; GO:0044446 intracellular organelle part; GO:0005737 cytoplasm; GO:0070161 anchoring junction; GO:0032991 macromolecular complex; GO:0044424 intracellular part; GO:0005829 cytosol; GO:0005623 cell; GO:00…	GO:0097159 organic cyclic compound binding; GO:1901363 heterocyclic compound binding; GO:0003723 RNA binding; GO:0005488 binding; GO:0003676 nucleic acid binding; GO:0005515 protein binding; GO:0005198 structural molecule activity; GO:0003735 structural constituent of ribosome;	IPR023575;	Ribosomal protein S19, superfamily;	J	KOG0898	40S ribosomal protein S15
P62849	Specific	cytoplasm				GO:0044085 cellular component biogenesis; GO:0022613 ribonucleoprotein complex biogenesis; GO:0065008 regulation of biological quality; GO:0006518 peptide metabolic process; GO:0006725 cellular aromatic compound metabolic process; GO:0002262 myeloid cell homeostasis; GO:0044267 cellular protein metabolic process; GO:0009058 biosynthetic process; GO:1901566 organonitrogen compound biosynthetic pro…	GO:0005840 ribosome; GO:0043229 intracellular organelle; GO:0016020 membrane; GO:0043232 intracellular non-membrane-bounded organelle; GO:0015935 small ribosomal subunit; GO:0044446 intracellular organelle part; GO:0005737 cytoplasm; GO:0032991 macromolecular complex; GO:0044424 intracellular part; GO:0005829 cytosol; GO:0005623 cell; GO:0044422 organelle part; GO:0043228 non-membrane-bounded org…	GO:0097159 organic cyclic compound binding; GO:1901363 heterocyclic compound binding; GO:0003723 RNA binding; GO:1901265 nucleoside phosphate binding; GO:0005488 binding; GO:0003676 nucleic acid binding; GO:0000166 nucleotide binding; GO:0003735 structural constituent of ribosome; GO:0005198 structural molecule activity; GO:0036094 small molecule binding;	IPR012678; IPR012677;	Ribosomal protein L23/L15e core domain; Nucleotide-binding alpha-beta plait domain;	J	KOG3424	40S ribosomal protein S24
P62855	Specific	cytoplasm	K02976	RP-S26e, RPS26; small subunit ribosomal protein S26e	mmu03010 Ribosome	GO:0050794 regulation of cellular process; GO:0006518 peptide metabolic process; GO:0060255 regulation of macromolecule metabolic process; GO:0019219 regulation of nucleobase-containing compound metabolic process; GO:0044267 cellular protein metabolic process; GO:0009058 biosynthetic process; GO:0048519 negative regulation of biological process; GO:0031324 negative regulation of cellular metaboli…	GO:0016020 membrane; GO:0044421 extracellular region part; GO:0030054 cell junction; GO:0031982 vesicle; GO:0015935 small ribosomal subunit; GO:0005737 cytoplasm; GO:0032991 macromolecular complex; GO:0044424 intracellular part; GO:0005913 cell-cell adherens junction; GO:0005911 cell-cell junction; GO:0005623 cell; GO:0044422 organelle part; GO:0043228 non-membrane-bounded organelle; GO:0070062 e…	GO:0097159 organic cyclic compound binding; GO:1901363 heterocyclic compound binding; GO:0098641 cadherin binding involved in cell-cell adhesion; GO:0050839 cell adhesion molecule binding; GO:0003729 mRNA binding; GO:0003723 RNA binding; GO:0098631 protein binding involved in cell adhesion; GO:0005488 binding; GO:0045296 cadherin binding; GO:0003676 nucleic acid binding; GO:0005515 protein bindin…			J	KOG1768	40s ribosomal protein S26
P62918	Specific	cytoplasm	K02938	RP-L8e, RPL8; large subunit ribosomal protein L8e	mmu03010 Ribosome	GO:0006518 peptide metabolic process; GO:0043043 peptide biosynthetic process; GO:0044267 cellular protein metabolic process; GO:0006807 nitrogen compound metabolic process; GO:0009058 biosynthetic process; GO:0043603 cellular amide metabolic process; GO:0044238 primary metabolic process; GO:1901566 organonitrogen compound biosynthetic process; GO:1901576 organic substance biosynthetic process; G…	GO:0005840 ribosome; GO:0043229 intracellular organelle; GO:0016020 membrane; GO:0043232 intracellular non-membrane-bounded organelle; GO:0022625 cytosolic large ribosomal subunit; GO:0030054 cell junction; GO:0044446 intracellular organelle part; GO:0005737 cytoplasm; GO:0070161 anchoring junction; GO:0032991 macromolecular complex; GO:0044424 intracellular part; GO:0005829 cytosol; GO:0005623 c…	GO:0097159 organic cyclic compound binding; GO:1901363 heterocyclic compound binding; GO:0003723 RNA binding; GO:0005488 binding; GO:0003676 nucleic acid binding; GO:0005515 protein binding; GO:0005198 structural molecule activity; GO:0003735 structural constituent of ribosome; GO:0019843 rRNA binding;	IPR008991; IPR012340; IPR022669; IPR014726; IPR022666; IPR014722;	Translation protein SH3-like domain; Nucleic acid-binding, OB-fold; Ribosomal protein L2, C-terminal; Ribosomal protein L2, domain 3; Ribosomal Proteins L2, RNA binding domain; Ribosomal protein L2 domain 2;	J	KOG2309	60s ribosomal protein L2/L8
P63030	Specific	cytoplasm	K22138	MPC1; mitochondrial pyruvate carrier 1		GO:0051188 cofactor biosynthetic process; GO:0019362 pyridine nucleotide metabolic process; GO:0009117 nucleotide metabolic process; GO:0006839 mitochondrial transport; GO:0044699 single-organism process; GO:0009058 biosynthetic process; GO:0044237 cellular metabolic process; GO:0072524 pyridine-containing compound metabolic process; GO:0035384 thioester biosynthetic process; GO:0044272 sulfur co…	GO:0016020 membrane; GO:0031090 organelle membrane; GO:0005737 cytoplasm; GO:0031305 integral component of mitochondrial inner membrane; GO:0031224 intrinsic component of membrane; GO:0044424 intracellular part; GO:0044455 mitochondrial membrane part; GO:0005623 cell; GO:0031304 intrinsic component of mitochondrial inner membrane; GO:0044422 organelle part; GO:0005740 mitochondrial envelope; GO:0…				S	KOG1590	Uncharacterized conserved protein
P63038	Specific	mitochondria	K04077	groEL, HSPD1; chaperonin GroEL	mmu03018 RNA degradation; mmu04940 Type I diabetes mellitus; mmu05134 Legionellosis; mmu05152 Tuberculosis	GO:0044700 single organism signaling; GO:0002694 regulation of leukocyte activation; GO:0009593 detection of chemical stimulus; GO:0010941 regulation of cell death; GO:0032680 regulation of tumor necrosis factor production; GO:0043523 regulation of neuron apoptotic process; GO:0046683 response to organophosphorus; GO:0031347 regulation of defense response; GO:0044237 cellular metabolic process; G…	GO:0016020 membrane; GO:0044421 extracellular region part; GO:0031090 organelle membrane; GO:0098857 membrane microdomain; GO:0005737 cytoplasm; GO:0044438 microbody part; GO:0032991 macromolecular complex; GO:0044455 mitochondrial membrane part; GO:0005623 cell; GO:1902911 protein kinase complex; GO:0044422 organelle part; GO:0005769 early endosome; GO:0070062 extracellular exosome; GO:0043209 m…	GO:1901265 nucleoside phosphate binding; GO:0031625 ubiquitin protein ligase binding; GO:0042562 hormone binding; GO:0046983 protein dimerization activity; GO:0016787 hydrolase activity; GO:0005515 protein binding; GO:0044183 protein binding involved in protein folding; GO:0097159 organic cyclic compound binding; GO:1901363 heterocyclic compound binding; GO:0003824 catalytic activity; GO:0042277 …	IPR027409; IPR027413;	GroEL-like apical domain; GroEL-like equatorial domain;	O	KOG0356	Mitochondrial chaperonin, Cpn60/Hsp60p
P63325	Specific	nucleus	K02947	RP-S10e, RPS10; small subunit ribosomal protein S10e	mmu03010 Ribosome	GO:0044085 cellular component biogenesis; GO:0016043 cellular component organization; GO:0034622 cellular macromolecular complex assembly; GO:0022613 ribonucleoprotein complex biogenesis; GO:0022618 ribonucleoprotein complex assembly; GO:0042274 ribosomal small subunit biogenesis; GO:0042254 ribosome biogenesis; GO:0000028 ribosomal small subunit assembly; GO:0043933 macromolecular complex subuni…	GO:0016020 membrane; GO:0044421 extracellular region part; GO:0030054 cell junction; GO:0015935 small ribosomal subunit; GO:0005737 cytoplasm; GO:0031982 vesicle; GO:0032991 macromolecular complex; GO:0044424 intracellular part; GO:0005623 cell; GO:0044422 organelle part; GO:0043228 non-membrane-bounded organelle; GO:0031974 membrane-enclosed lumen; GO:0070062 extracellular exosome; GO:0070013 in…	GO:0097159 organic cyclic compound binding; GO:1901363 heterocyclic compound binding; GO:0003723 RNA binding; GO:0005488 binding; GO:0003676 nucleic acid binding; GO:0005198 structural molecule activity; GO:0003735 structural constituent of ribosome;	IPR005326;	Plectin/S10, N-terminal;	J	KOG3344	40s ribosomal protein s10
P68040	Specific	cytoplasm,nucleus	K14753	RACK1; guanine nucleotide-binding protein subunit beta-2-like 1 protein	mmu05162 Measles	GO:0044700 single organism signaling; GO:0010941 regulation of cell death; GO:0051342 regulation of cyclic-nucleotide phosphodiesterase activity; GO:0010608 posttranscriptional regulation of gene expression; GO:0032436 positive regulation of proteasomal ubiquitin-dependent protein catabolic process; GO:0042593 glucose homeostasis; GO:0044237 cellular metabolic process; GO:1904181 positive regulat…	GO:0016020 membrane; GO:0030425 dendrite; GO:0044421 extracellular region part; GO:0071944 cell periphery; GO:0030054 cell junction; GO:0031982 vesicle; GO:0015935 small ribosomal subunit; GO:0005737 cytoplasm; GO:0043025 neuronal cell body; GO:0032991 macromolecular complex; GO:0044424 intracellular part; GO:0005913 cell-cell adherens junction; GO:0005911 cell-cell junction; GO:0005623 cell; GO:…	GO:0008200 ion channel inhibitor activity; GO:1990782 protein tyrosine kinase binding; GO:0019903 protein phosphatase binding; GO:0005102 receptor binding; GO:0061134 peptidase regulator activity; GO:0043028 cysteine-type endopeptidase regulator activity involved in apoptotic process; GO:0019901 protein kinase binding; GO:0046983 protein dimerization activity; GO:0016504 peptidase activator activ…	IPR017986; IPR015943;	WD40-repeat-containing domain; WD40/YVTN repeat-like-containing domain;	T	KOG0279	G protein beta subunit-like protein
P68372	Specific	cytoplasm,nucleus	K07375	TUBB; tubulin beta	mmu04145 Phagosome; mmu04540 Gap junction	GO:0016043 cellular component organization; GO:0007010 cytoskeleton organization; GO:0007017 microtubule-based process; GO:0009987 cellular process; GO:0006996 organelle organization; GO:0071840 cellular component organization or biogenesis;	GO:0045298 tubulin complex; GO:0044421 extracellular region part; GO:0005874 microtubule; GO:0031982 vesicle; GO:0005737 cytoplasm; GO:0032991 macromolecular complex; GO:0099512 supramolecular fiber; GO:0044424 intracellular part; GO:0099080 supramolecular complex; GO:0005623 cell; GO:0044422 organelle part; GO:0043228 non-membrane-bounded organelle; GO:0070062 extracellular exosome; GO:0005856 c…	GO:1901265 nucleoside phosphate binding; GO:0016817 hydrolase activity, acting on acid anhydrides; GO:0016787 hydrolase activity; GO:1901363 heterocyclic compound binding; GO:0097159 organic cyclic compound binding; GO:0016462 pyrophosphatase activity; GO:0032553 ribonucleotide binding; GO:0003824 catalytic activity; GO:0005488 binding; GO:0032550 purine ribonucleoside binding; GO:0003924 GTPase …	IPR003008; IPR023123; IPR008280; IPR018316;	Tubulin/FtsZ, GTPase domain; Tubulin, C-terminal; Tubulin/FtsZ, C-terminal; Tubulin/FtsZ, 2-layer sandwich domain;	Z	KOG1375	Beta tubulin
P70372	Specific	nucleus	K13088	ELAVL1, HUR; ELAV-like protein 1	mmu04152 AMPK signaling pathway; mmu04657 IL-17 signaling pathway	GO:0050794 regulation of cellular process; GO:0065008 regulation of biological quality; GO:0032270 positive regulation of cellular protein metabolic process; GO:0060255 regulation of macromolecule metabolic process; GO:0010608 posttranscriptional regulation of gene expression; GO:0043489 RNA stabilization; GO:0009891 positive regulation of biosynthetic process; GO:2000036 regulation of stem cell …	GO:0043229 intracellular organelle; GO:0016020 membrane; GO:0044446 intracellular organelle part; GO:0005737 cytoplasm; GO:0032991 macromolecular complex; GO:0031981 nuclear lumen; GO:0044424 intracellular part; GO:0005623 cell; GO:0005829 cytosol; GO:0044422 organelle part; GO:0043231 intracellular membrane-bounded organelle; GO:0043226 organelle; GO:0031974 membrane-enclosed lumen; GO:0005654 n…	GO:0003723 RNA binding; GO:0017091 AU-rich element binding; GO:1901265 nucleoside phosphate binding; GO:0003725 double-stranded RNA binding; GO:0003730 mRNA 3'-UTR binding; GO:0046983 protein dimerization activity; GO:0019901 protein kinase binding; GO:0005515 protein binding; GO:0000166 nucleotide binding; GO:0035925 mRNA 3'-UTR AU-rich region binding; GO:0019900 kinase binding; GO:1901363 heter…	IPR000504; IPR012677;	RNA recognition motif domain; Nucleotide-binding alpha-beta plait domain;	A	KOG0145	RNA-binding protein ELAV/HU (RRM superfamily)
P80315	Specific	cytoplasm	K09496	CCT4; T-complex protein 1 subunit delta		GO:0065008 regulation of biological quality; GO:0035036 sperm-egg recognition; GO:0022414 reproductive process; GO:0051973 positive regulation of telomerase activity; GO:0061077 chaperone-mediated protein folding; GO:0009891 positive regulation of biosynthetic process; GO:0044699 single-organism process; GO:1901998 toxin transport; GO:1904816 positive regulation of protein localization to chromos…	GO:0044421 extracellular region part; GO:0005874 microtubule; GO:0031410 cytoplasmic vesicle; GO:0005737 cytoplasm; GO:0031982 vesicle; GO:0032991 macromolecular complex; GO:0044424 intracellular part; GO:0099512 supramolecular fiber; GO:0099080 supramolecular complex; GO:0005623 cell; GO:0044422 organelle part; GO:0048770 pigment granule; GO:0002199 zona pellucida receptor complex; GO:0043228 no…	GO:0003723 RNA binding; GO:0005524 ATP binding; GO:1901265 nucleoside phosphate binding; GO:0001882 nucleoside binding; GO:0043167 ion binding; GO:0005515 protein binding; GO:0000166 nucleotide binding; GO:0044183 protein binding involved in protein folding; GO:1901363 heterocyclic compound binding; GO:0097159 organic cyclic compound binding; GO:0032549 ribonucleoside binding; GO:0097367 carbohyd…	IPR027410; IPR027409; IPR027413;	TCP-1-like chaperonin intermediate domain; GroEL-like apical domain; GroEL-like equatorial domain;	O	KOG0358	Chaperonin complex component, TCP-1 delta subunit (CCT4)
P80317	Specific	cytoplasm	K09498	CCT6; T-complex protein 1 subunit zeta		GO:0065008 regulation of biological quality; GO:0035036 sperm-egg recognition; GO:0022414 reproductive process; GO:0061077 chaperone-mediated protein folding; GO:0009891 positive regulation of biosynthetic process; GO:0044699 single-organism process; GO:1901998 toxin transport; GO:1904816 positive regulation of protein localization to chromosome, telomeric region; GO:0032204 regulation of telomer…	GO:0044421 extracellular region part; GO:0005874 microtubule; GO:0031410 cytoplasmic vesicle; GO:0031982 vesicle; GO:0005737 cytoplasm; GO:0032991 macromolecular complex; GO:0099512 supramolecular fiber; GO:0044424 intracellular part; GO:0005623 cell; GO:0099080 supramolecular complex; GO:0044422 organelle part; GO:0002199 zona pellucida receptor complex; GO:0043228 non-membrane-bounded organelle…	GO:0003723 RNA binding; GO:0005524 ATP binding; GO:1901265 nucleoside phosphate binding; GO:0001882 nucleoside binding; GO:0043167 ion binding; GO:0005515 protein binding; GO:0000166 nucleotide binding; GO:0044183 protein binding involved in protein folding; GO:1901363 heterocyclic compound binding; GO:0097159 organic cyclic compound binding; GO:0032549 ribonucleoside binding; GO:0097367 carbohyd…	IPR027410; IPR027409; IPR027413;	TCP-1-like chaperonin intermediate domain; GroEL-like apical domain; GroEL-like equatorial domain;	O	KOG0359	Chaperonin complex component, TCP-1 zeta subunit (CCT6)
P80318	Specific	mitochondria	K09495	CCT3, TRIC5; T-complex protein 1 subunit gamma		GO:0044085 cellular component biogenesis; GO:0065008 regulation of biological quality; GO:0035036 sperm-egg recognition; GO:0022414 reproductive process; GO:0061077 chaperone-mediated protein folding; GO:0009891 positive regulation of biosynthetic process; GO:0044699 single-organism process; GO:1901998 toxin transport; GO:0032204 regulation of telomere maintenance; GO:0051234 establishment of loc…	GO:0016020 membrane; GO:0044421 extracellular region part; GO:0005874 microtubule; GO:0071944 cell periphery; GO:0031982 vesicle; GO:0005737 cytoplasm; GO:0032991 macromolecular complex; GO:0099512 supramolecular fiber; GO:0044424 intracellular part; GO:0005623 cell; GO:0099080 supramolecular complex; GO:0044422 organelle part; GO:0002199 zona pellucida receptor complex; GO:0043228 non-membrane-b…	GO:0003723 RNA binding; GO:0005524 ATP binding; GO:1901265 nucleoside phosphate binding; GO:0001882 nucleoside binding; GO:0043167 ion binding; GO:0005515 protein binding; GO:0000166 nucleotide binding; GO:0044183 protein binding involved in protein folding; GO:1901363 heterocyclic compound binding; GO:0097159 organic cyclic compound binding; GO:0032549 ribonucleoside binding; GO:0097367 carbohyd…	IPR027410; IPR027409; IPR027413;	TCP-1-like chaperonin intermediate domain; GroEL-like apical domain; GroEL-like equatorial domain;	O	KOG0364	Chaperonin complex component, TCP-1 gamma subunit (CCT3)
P86048	Specific	cytoplasm				GO:0000003 reproduction; GO:0044085 cellular component biogenesis; GO:0016043 cellular component organization; GO:0022613 ribonucleoprotein complex biogenesis; GO:0006518 peptide metabolic process; GO:0022618 ribonucleoprotein complex assembly; GO:0022414 reproductive process; GO:0044267 cellular protein metabolic process; GO:0044699 single-organism process; GO:0009058 biosynthetic process; GO:19…	GO:0005840 ribosome; GO:0043229 intracellular organelle; GO:0016020 membrane; GO:0043232 intracellular non-membrane-bounded organelle; GO:0022625 cytosolic large ribosomal subunit; GO:0044446 intracellular organelle part; GO:0005737 cytoplasm; GO:0032991 macromolecular complex; GO:0044424 intracellular part; GO:0005829 cytosol; GO:0005623 cell; GO:0044422 organelle part; GO:0043228 non-membrane-b…	GO:0003735 structural constituent of ribosome; GO:0005198 structural molecule activity;	IPR016180;	Ribosomal protein L10e/L16;	J	KOG0857	60s ribosomal protein L10
P97379	Specific	cytoplasm				GO:0050794 regulation of cellular process; GO:0044700 single organism signaling; GO:0050658 RNA transport; GO:0051716 cellular response to stimulus; GO:0035556 intracellular signal transduction; GO:0006403 RNA localization; GO:0051028 mRNA transport; GO:0044699 single-organism process; GO:0071702 organic substance transport; GO:0007264 small GTPase mediated signal transduction; GO:0023052 signali…	GO:0005622 intracellular; GO:0044464 cell part; GO:0005737 cytoplasm; GO:0032991 macromolecular complex; GO:0044424 intracellular part; GO:1990904 ribonucleoprotein complex; GO:0005829 cytosol; GO:0005623 cell; GO:0030529 intracellular ribonucleoprotein complex; GO:0044444 cytoplasmic part;	GO:0097159 organic cyclic compound binding; GO:1901363 heterocyclic compound binding; GO:0003729 mRNA binding; GO:0003723 RNA binding; GO:1901265 nucleoside phosphate binding; GO:0005488 binding; GO:0003676 nucleic acid binding; GO:0000166 nucleotide binding; GO:0036094 small molecule binding;	IPR002075; IPR018222; IPR000504; IPR012677; IPR032710;	Nuclear transport factor 2; Nuclear transport factor 2, eukaryote; RNA recognition motif domain; Nucleotide-binding alpha-beta plait domain; NTF2-like domain;	T	KOG0116	RasGAP SH3 binding protein rasputin, contains NTF2 and RRM domains
P97742	Specific	plasma membrane	K08765	CPT1A; carnitine O-palmitoyltransferase 1, liver isoform [EC:2.3.1.21]	mmu00071 Fatty acid degradation; mmu01212 Fatty acid metabolism; mmu03320 PPAR signaling pathway; mmu04152 AMPK signaling pathway; mmu04714 Thermogenesis; mmu04920 Adipocytokine signaling pathway; mmu04922 Glucagon signaling pathway; mmu04931 Insulin resistance	GO:0044085 cellular component biogenesis; GO:0065008 regulation of biological quality; GO:0050796 regulation of insulin secretion; GO:0044255 cellular lipid metabolic process; GO:0019216 regulation of lipid metabolic process; GO:0044237 cellular metabolic process; GO:0007610 behavior; GO:0006006 glucose metabolic process; GO:0032000 positive regulation of fatty acid beta-oxidation; GO:0008152 met…	GO:0016020 membrane; GO:0019867 outer membrane; GO:0031090 organelle membrane; GO:0005737 cytoplasm; GO:0031306 intrinsic component of mitochondrial outer membrane; GO:0031224 intrinsic component of membrane; GO:0044424 intracellular part; GO:0044455 mitochondrial membrane part; GO:0005623 cell; GO:0044422 organelle part; GO:0005740 mitochondrial envelope; GO:0031301 integral component of organel…	GO:0016746 transferase activity, transferring acyl groups; GO:0016406 carnitine O-acyltransferase activity; GO:0042802 identical protein binding; GO:1990698 palmitoleoyltransferase activity; GO:0003824 catalytic activity; GO:0005488 binding; GO:0005515 protein binding; GO:0016409 palmitoyltransferase activity; GO:0004095 carnitine O-palmitoyltransferase activity; GO:0016416 O-palmitoyltransferase…	IPR032476;	Carnitine O-palmitoyltransferase, N-terminal;	I	KOG3716	Carnitine O-acyltransferase CPTI
P97807	Specific	mitochondria	K01679	E4.2.1.2B, fumC; fumarate hydratase, class II [EC:4.2.1.2]	mmu00020 Citrate cycle (TCA cycle); mmu00620 Pyruvate metabolism; mmu01100 Metabolic pathways; mmu01200 Carbon metabolism; mmu04934 Cushing syndrome; mmu05200 Pathways in cancer; mmu05211 Renal cell carcinoma	GO:0043648 dicarboxylic acid metabolic process; GO:0044707 single-multicellular organism process; GO:0065008 regulation of biological quality; GO:0044699 single-organism process; GO:0044237 cellular metabolic process; GO:0048871 multicellular organismal homeostasis; GO:0060249 anatomical structure homeostasis; GO:0071704 organic substance metabolic process; GO:0042592 homeostatic process; GO:0008…	GO:0043229 intracellular organelle; GO:0044421 extracellular region part; GO:0005737 cytoplasm; GO:0031982 vesicle; GO:0032991 macromolecular complex; GO:0044424 intracellular part; GO:0005623 cell; GO:0005576 extracellular region; GO:0005739 mitochondrion; GO:0043231 intracellular membrane-bounded organelle; GO:0043226 organelle; GO:0070062 extracellular exosome; GO:0005622 intracellular; GO:004…	GO:0016829 lyase activity; GO:0016836 hydro-lyase activity; GO:0003824 catalytic activity; GO:0004333 fumarate hydratase activity; GO:0016835 carbon-oxygen lyase activity;	IPR024083; IPR008948; IPR022761; IPR018951;	Fumarase/histidase, N-terminal; L-Aspartase-like; Fumarate lyase, N-terminal; Fumarase C, C-terminal;	C	KOG1317	Fumarase
P99024	Specific	cytoplasm,nucleus	K07375	TUBB; tubulin beta	mmu04145 Phagosome; mmu04540 Gap junction	GO:0044085 cellular component biogenesis; GO:0016043 cellular component organization; GO:0044763 single-organism cellular process; GO:0007051 spindle organization; GO:0044699 single-organism process; GO:0007017 microtubule-based process; GO:0006457 protein folding; GO:0000226 microtubule cytoskeleton organization; GO:0051225 spindle assembly; GO:0070925 organelle assembly; GO:0022607 cellular com…	GO:0045298 tubulin complex; GO:0044421 extracellular region part; GO:0005874 microtubule; GO:0031982 vesicle; GO:0005737 cytoplasm; GO:0032991 macromolecular complex; GO:0099512 supramolecular fiber; GO:0044424 intracellular part; GO:0099080 supramolecular complex; GO:0005623 cell; GO:0036464 cytoplasmic ribonucleoprotein granule; GO:0044422 organelle part; GO:0005641 nuclear envelope lumen; GO:0…	GO:1901265 nucleoside phosphate binding; GO:0031625 ubiquitin protein ligase binding; GO:0005102 receptor binding; GO:0016817 hydrolase activity, acting on acid anhydrides; GO:0016787 hydrolase activity; GO:0005515 protein binding; GO:0042288 MHC class I protein binding; GO:0032794 GTPase activating protein binding; GO:1901363 heterocyclic compound binding; GO:0097159 organic cyclic compound bind…	IPR003008; IPR023123; IPR008280; IPR018316;	Tubulin/FtsZ, GTPase domain; Tubulin, C-terminal; Tubulin/FtsZ, C-terminal; Tubulin/FtsZ, 2-layer sandwich domain;	Z	KOG1375	Beta tubulin
Q06185	Specific	cytoplasm	K02129	ATPeF0E, ATP5I; F-type H+-transporting ATPase subunit e	mmu00190 Oxidative phosphorylation; mmu01100 Metabolic pathways; mmu04714 Thermogenesis	GO:0009116 nucleoside metabolic process; GO:0042278 purine nucleoside metabolic process; GO:0009167 purine ribonucleoside monophosphate metabolic process; GO:0009117 nucleotide metabolic process; GO:0044699 single-organism process; GO:0009058 biosynthetic process; GO:0009163 nucleoside biosynthetic process; GO:0046129 purine ribonucleoside biosynthetic process; GO:0009156 ribonucleoside monophosp…	GO:0016020 membrane; GO:0098800 inner mitochondrial membrane protein complex; GO:0031090 organelle membrane; GO:0098796 membrane protein complex; GO:0005737 cytoplasm; GO:0032991 macromolecular complex; GO:0044424 intracellular part; GO:0098798 mitochondrial protein complex; GO:0005623 cell; GO:0044455 mitochondrial membrane part; GO:0044422 organelle part; GO:0005740 mitochondrial envelope; GO:0…	GO:0015075 ion transmembrane transporter activity; GO:0016817 hydrolase activity, acting on acid anhydrides; GO:0022892 substrate-specific transporter activity; GO:0016787 hydrolase activity; GO:0015077 monovalent inorganic cation transmembrane transporter activity; GO:0017111 nucleoside-triphosphatase activity; GO:0015078 hydrogen ion transmembrane transporter activity; GO:0016887 ATPase activit…			C	KOG4326	Mitochondrial F1F0-ATP synthase, subunit e
Q3TLP5	Specific	mitochondria				GO:0034440 lipid oxidation; GO:0044699 single-organism process; GO:0044255 cellular lipid metabolic process; GO:0044237 cellular metabolic process; GO:0071704 organic substance metabolic process; GO:0008152 metabolic process; GO:0030258 lipid modification; GO:0044248 cellular catabolic process; GO:0032787 monocarboxylic acid metabolic process; GO:0009987 cellular process; GO:0006629 lipid metabol…	GO:0043226 organelle; GO:0043231 intracellular membrane-bounded organelle; GO:0043229 intracellular organelle; GO:0044464 cell part; GO:0005622 intracellular; GO:0005737 cytoplasm; GO:0044424 intracellular part; GO:0043227 membrane-bounded organelle; GO:0005623 cell; GO:0005739 mitochondrion; GO:0044444 cytoplasmic part;	GO:0016829 lyase activity; GO:0016836 hydro-lyase activity; GO:0003824 catalytic activity; GO:0016835 carbon-oxygen lyase activity; GO:0004300 enoyl-CoA hydratase activity;	IPR029045; IPR014748;	ClpP/crotonase-like domain; Crontonase, C-terminal;	I	KOG1679	Enoyl-CoA hydratase
Q3UQ44	Specific	nucleus	K05767	IQGAP2_3; Ras GTPase-activating-like protein IQGAP2/3	mmu04810 Regulation of actin cytoskeleton	GO:0044700 single organism signaling; GO:0030833 regulation of actin filament polymerization; GO:0050794 regulation of cellular process; GO:0016043 cellular component organization; GO:0034314 Arp2/3 complex-mediated actin nucleation; GO:0065008 regulation of biological quality; GO:0032273 positive regulation of protein polymerization; GO:0032956 regulation of actin cytoskeleton organization; GO:0…	GO:0044421 extracellular region part; GO:0005874 microtubule; GO:0031982 vesicle; GO:0005737 cytoplasm; GO:0032991 macromolecular complex; GO:0099512 supramolecular fiber; GO:0044424 intracellular part; GO:0098858 actin-based cell projection; GO:0005623 cell; GO:0099080 supramolecular complex; GO:0044422 organelle part; GO:0043228 non-membrane-bounded organelle; GO:0070062 extracellular exosome; …	GO:0031267 small GTPase binding; GO:0051015 actin filament binding; GO:1901981 phosphatidylinositol phosphate binding; GO:0017048 Rho GTPase binding; GO:0048365 Rac GTPase binding; GO:0071933 Arp2/3 complex binding; GO:0043167 ion binding; GO:0044877 macromolecular complex binding; GO:0005515 protein binding; GO:0005516 calmodulin binding; GO:0008092 cytoskeletal protein binding; GO:0017016 Ras G…	IPR001936; IPR001202; IPR001715; IPR000593; IPR008936;	Ras GTPase-activating protein; WW domain; Calponin homology domain; RasGAP protein, C-terminal; Rho GTPase activation protein;	T	KOG2128	Ras GTPase-activating protein family - IQGAP
Q4LDG0	Specific	endoplasmic reticulum	K08748	SLC27A5, FATP5; solute carrier family 27 (fatty acid transporter), member 5 [EC:6.2.1.7]	mmu00120 Primary bile acid biosynthesis; mmu01100 Metabolic pathways; mmu03320 PPAR signaling pathway; mmu04931 Insulin resistance; mmu04976 Bile secretion	GO:0046486 glycerolipid metabolic process; GO:0016053 organic acid biosynthetic process; GO:0044699 single-organism process; GO:0009058 biosynthetic process; GO:0044255 cellular lipid metabolic process; GO:0044237 cellular metabolic process; GO:0008610 lipid biosynthetic process; GO:0051234 establishment of localization; GO:0008152 metabolic process; GO:0015718 monocarboxylic acid transport; GO:1…	GO:0016323 basolateral plasma membrane; GO:0016020 membrane; GO:0042175 nuclear outer membrane-endoplasmic reticulum membrane network; GO:0005783 endoplasmic reticulum; GO:0071944 cell periphery; GO:0005737 cytoplasm; GO:0032991 macromolecular complex; GO:0031224 intrinsic component of membrane; GO:0044424 intracellular part; GO:0005623 cell; GO:0044422 organelle part; GO:0098590 plasma membrane …	GO:1901265 nucleoside phosphate binding; GO:0016874 ligase activity; GO:0005319 lipid transporter activity; GO:0022892 substrate-specific transporter activity; GO:0005515 protein binding; GO:0016877 ligase activity, forming carbon-sulfur bonds; GO:0097159 organic cyclic compound binding; GO:1901363 heterocyclic compound binding; GO:0003824 catalytic activity; GO:0032553 ribonucleotide binding; GO…	IPR025110; IPR000873;	AMP-binding enzyme C-terminal domain; AMP-dependent synthetase/ligase;	I	KOG1179	Very long-chain acyl-CoA synthetase/fatty acid transporter
Q571I9	Specific	plasma membrane				GO:0044699 single-organism process; GO:0008152 metabolic process; GO:0055114 oxidation-reduction process; GO:0044710 single-organism metabolic process;	GO:0016020 membrane; GO:0070062 extracellular exosome; GO:0043226 organelle; GO:0044421 extracellular region part; GO:0031982 vesicle; GO:1903561 extracellular vesicle; GO:0043227 membrane-bounded organelle; GO:0005576 extracellular region; GO:0043230 extracellular organelle;	GO:0016620 oxidoreductase activity, acting on the aldehyde or oxo group of donors, NAD or NADP as acceptor; GO:0003824 catalytic activity; GO:0004029 aldehyde dehydrogenase (NAD) activity; GO:0016491 oxidoreductase activity; GO:0016903 oxidoreductase activity, acting on the aldehyde or oxo group of donors;	IPR016161; IPR015590; IPR016162; IPR016163;	Aldehyde/histidinol dehydrogenase; Aldehyde dehydrogenase domain; Aldehyde dehydrogenase N-terminal domain; Aldehyde dehydrogenase, C-terminal;	C	KOG2450	Aldehyde dehydrogenase
Q60668	Specific	nucleus	K13044	HNRNPABD; heterogeneous nuclear ribonucleoprotein A/B/D		GO:0065008 regulation of biological quality; GO:0048732 gland development; GO:0032270 positive regulation of cellular protein metabolic process; GO:0051973 positive regulation of telomerase activity; GO:0043489 RNA stabilization; GO:0097659 nucleic acid-templated transcription; GO:0010608 posttranscriptional regulation of gene expression; GO:0007420 brain development; GO:0009891 positive regulati…	GO:0043229 intracellular organelle; GO:0044421 extracellular region part; GO:0044446 intracellular organelle part; GO:0031982 vesicle; GO:0005737 cytoplasm; GO:0032991 macromolecular complex; GO:0031981 nuclear lumen; GO:0044424 intracellular part; GO:0005829 cytosol; GO:0005623 cell; GO:0005576 extracellular region; GO:0044422 organelle part; GO:0031974 membrane-enclosed lumen; GO:0043231 intrac…	GO:0003723 RNA binding; GO:0003677 DNA binding; GO:0017091 AU-rich element binding; GO:1901265 nucleoside phosphate binding; GO:0003690 double-stranded DNA binding; GO:0003730 mRNA 3'-UTR binding; GO:1990837 sequence-specific double-stranded DNA binding; GO:0042162 telomeric DNA binding; GO:0005515 protein binding; GO:0000166 nucleotide binding; GO:0003682 chromatin binding; GO:0035925 mRNA 3'-UT…	IPR000504; IPR012677; IPR012956;	RNA recognition motif domain; Nucleotide-binding alpha-beta plait domain; CARG-binding factor, N-terminal;	R	KOG0118	FOG: RRM domain
Q60759	Specific	mitochondria	K00252	GCDH, gcdH; glutaryl-CoA dehydrogenase [EC:1.3.8.6]	mmu00071 Fatty acid degradation; mmu00310 Lysine degradation; mmu00380 Tryptophan metabolism; mmu01100 Metabolic pathways	GO:0034440 lipid oxidation; GO:0006725 cellular aromatic compound metabolic process; GO:0044699 single-organism process; GO:0044255 cellular lipid metabolic process; GO:0044237 cellular metabolic process; GO:0006576 cellular biogenic amine metabolic process; GO:0071704 organic substance metabolic process; GO:0008152 metabolic process; GO:0006520 cellular amino acid metabolic process; GO:0046483 h…	GO:0016020 membrane; GO:0005759 mitochondrial matrix; GO:0043229 intracellular organelle; GO:0044429 mitochondrial part; GO:0031090 organelle membrane; GO:0031967 organelle envelope; GO:0005737 cytoplasm; GO:0044446 intracellular organelle part; GO:0044424 intracellular part; GO:0005623 cell; GO:0005739 mitochondrion; GO:0044422 organelle part; GO:0005740 mitochondrial envelope; GO:0031974 membra…	GO:1901265 nucleoside phosphate binding; GO:0050660 flavin adenine dinucleotide binding; GO:0043167 ion binding; GO:0004361 glutaryl-CoA dehydrogenase activity; GO:0000166 nucleotide binding; GO:0048037 cofactor binding; GO:0016491 oxidoreductase activity; GO:0016627 oxidoreductase activity, acting on the CH-CH group of donors; GO:1901363 heterocyclic compound binding; GO:0097159 organic cyclic c…	IPR009100; IPR013786; IPR006091; IPR009075;	Acyl-CoA dehydrogenase/oxidase, N-terminal and middle domain; Acyl-CoA dehydrogenase/oxidase, N-terminal; Acyl-CoA oxidase/dehydrogenase, central domain; Acyl-CoA dehydrogenase/oxidase C-terminal;	E	KOG0138	Glutaryl-CoA dehydrogenase
Q60936	Specific	cytoplasm	K08869	ADCK, ABC1; aarF domain-containing kinase		GO:0051188 cofactor biosynthetic process; GO:0042181 ketone biosynthetic process; GO:0016310 phosphorylation; GO:1901663 quinone biosynthetic process; GO:0006744 ubiquinone biosynthetic process; GO:0006733 oxidoreduction coenzyme metabolic process; GO:0044711 single-organism biosynthetic process; GO:1901661 quinone metabolic process; GO:0044281 small molecule metabolic process; GO:0044763 single-…	GO:0043226 organelle; GO:0043231 intracellular membrane-bounded organelle; GO:0043229 intracellular organelle; GO:0016020 membrane; GO:0044464 cell part; GO:0005622 intracellular; GO:0044425 membrane part; GO:0005737 cytoplasm; GO:0031224 intrinsic component of membrane; GO:0044424 intracellular part; GO:0005623 cell; GO:0043227 membrane-bounded organelle; GO:0016021 integral component of membran…	GO:0005524 ATP binding; GO:1901265 nucleoside phosphate binding; GO:0001882 nucleoside binding; GO:0043167 ion binding; GO:0000166 nucleotide binding; GO:0097159 organic cyclic compound binding; GO:1901363 heterocyclic compound binding; GO:0032549 ribonucleoside binding; GO:0097367 carbohydrate derivative binding; GO:0016301 kinase activity; GO:0003824 catalytic activity; GO:0032553 ribonucleotid…	IPR004147; IPR011009;	UbiB domain; Protein kinase-like domain;	R	KOG1234	ABC (ATP binding cassette) 1 protein
Q61694	Specific	cytoplasm	K00070	HSD3B; 3beta-hydroxy-Delta5-steroid dehydrogenase / steroid Delta-isomerase [EC:1.1.1.145 5.3.3.1]	mmu00140 Steroid hormone biosynthesis; mmu01100 Metabolic pathways; mmu04913 Ovarian steroidogenesis; mmu04925 Aldosterone synthesis and secretion; mmu04927 Cortisol synthesis and secretion; mmu04934 Cushing syndrome	GO:0014070 response to organic cyclic compound; GO:0044711 single-organism biosynthetic process; GO:0055114 oxidation-reduction process; GO:0008202 steroid metabolic process; GO:1901360 organic cyclic compound metabolic process; GO:0044699 single-organism process; GO:0009058 biosynthetic process; GO:0010033 response to organic substance; GO:0050896 response to stimulus; GO:0044238 primary metabol…	GO:0043229 intracellular organelle; GO:0016020 membrane; GO:0042175 nuclear outer membrane-endoplasmic reticulum membrane network; GO:0005783 endoplasmic reticulum; GO:0044429 mitochondrial part; GO:0031090 organelle membrane; GO:0031967 organelle envelope; GO:0044446 intracellular organelle part; GO:0005737 cytoplasm; GO:0031224 intrinsic component of membrane; GO:0012505 endomembrane system; GO…	GO:0016229 steroid dehydrogenase activity; GO:0016614 oxidoreductase activity, acting on CH-OH group of donors; GO:0016616 oxidoreductase activity, acting on the CH-OH group of donors, NAD or NADP as acceptor; GO:0033764 steroid dehydrogenase activity, acting on the CH-OH group of donors, NAD or NADP as acceptor; GO:0003824 catalytic activity; GO:0003854 3-beta-hydroxy-delta5-steroid dehydrogenas…	IPR002225; IPR016040;	3-beta hydroxysteroid dehydrogenase/isomerase; NAD(P)-binding domain;	IE	KOG1430	C-3 sterol dehydrogenase/3-beta-hydroxysteroid dehydrogenase and related dehydrogenases
Q62095	Specific	nucleus	K17642	DDX3Y; ATP-dependent RNA helicase DDX3Y [EC:3.6.4.13]		GO:0006518 peptide metabolic process; GO:0006725 cellular aromatic compound metabolic process; GO:0060255 regulation of macromolecule metabolic process; GO:0044267 cellular protein metabolic process; GO:0009058 biosynthetic process; GO:1901566 organonitrogen compound biosynthetic process; GO:0044237 cellular metabolic process; GO:0071704 organic substance metabolic process; GO:0008152 metabolic p…	GO:0043229 intracellular organelle; GO:0016020 membrane; GO:0043232 intracellular non-membrane-bounded organelle; GO:0005737 cytoplasm; GO:0032991 macromolecular complex; GO:0044424 intracellular part; GO:0005829 cytosol; GO:0005623 cell; GO:0036464 cytoplasmic ribonucleoprotein granule; GO:0043228 non-membrane-bounded organelle; GO:0043231 intracellular membrane-bounded organelle; GO:0043226 org…	GO:1901265 nucleoside phosphate binding; GO:0008026 ATP-dependent helicase activity; GO:0016817 hydrolase activity, acting on acid anhydrides; GO:0016787 hydrolase activity; GO:0016887 ATPase activity; GO:1901363 heterocyclic compound binding; GO:0097159 organic cyclic compound binding; GO:0016462 pyrophosphatase activity; GO:0003824 catalytic activity; GO:0032553 ribonucleotide binding; GO:00054…	IPR011545; IPR014014; IPR014001; IPR027417; IPR001650;	DEAD/DEAH box helicase domain; RNA helicase, DEAD-box type, Q motif; Helicase superfamily 1/2, ATP-binding domain; P-loop containing nucleoside triphosphate hydrolase; Helicase, C-terminal;	A	KOG0335	ATP-dependent RNA helicase
Q62425	Specific	extracellular	K03948	NDUFA4; NADH dehydrogenase (ubiquinone) 1 alpha subcomplex subunit 4	mmu00190 Oxidative phosphorylation; mmu01100 Metabolic pathways; mmu04714 Thermogenesis; mmu04723 Retrograde endocannabinoid signaling; mmu04932 Non-alcoholic fatty liver disease (NAFLD); mmu05010 Alzheimer disease; mmu05012 Parkinson disease; mmu05016 Huntington disease	GO:0098655 cation transmembrane transport; GO:0034220 ion transmembrane transport; GO:0098660 inorganic ion transmembrane transport; GO:0055114 oxidation-reduction process; GO:0044699 single-organism process; GO:0015992 proton transport; GO:0006818 hydrogen transport; GO:0051234 establishment of localization; GO:0006810 transport; GO:0055085 transmembrane transport; GO:0008152 metabolic process; …	GO:0016020 membrane; GO:0044421 extracellular region part; GO:0098800 inner mitochondrial membrane protein complex; GO:0031090 organelle membrane; GO:0098796 membrane protein complex; GO:0005737 cytoplasm; GO:0031982 vesicle; GO:0032991 macromolecular complex; GO:0098798 mitochondrial protein complex; GO:0044424 intracellular part; GO:0044455 mitochondrial membrane part; GO:0005623 cell; GO:00444…	GO:0015075 ion transmembrane transporter activity; GO:0044877 macromolecular complex binding; GO:0022892 substrate-specific transporter activity; GO:0005515 protein binding; GO:0015077 monovalent inorganic cation transmembrane transporter activity; GO:0016676 oxidoreductase activity, acting on a heme group of donors, oxygen as acceptor; GO:0016675 oxidoreductase activity, acting on a heme group o…
Q63886	Specific	endoplasmic reticulum	K00699	UGT; glucuronosyltransferase [EC:2.4.1.17]	mmu00040 Pentose and glucuronate interconversions; mmu00053 Ascorbate and aldarate metabolism; mmu00140 Steroid hormone biosynthesis; mmu00830 Retinol metabolism; mmu00860 Porphyrin and chlorophyll metabolism; mmu00980 Metabolism of xenobiotics by cytochrome P450; mmu00982 Drug metabolism - cytochrome P450; mmu00983 Drug metabolism - other enzymes; mmu01100 Metabolic pathways; mmu05204 Chemical c…	GO:0031100 animal organ regeneration; GO:0048732 gland development; GO:0018879 biphenyl metabolic process; GO:0071384 cellular response to corticosteroid stimulus; GO:0044699 single-organism process; GO:0071383 cellular response to steroid hormone stimulus; GO:0044237 cellular metabolic process; GO:0009607 response to biotic stimulus; GO:0009605 response to external stimulus; GO:0008152 metabolic…	GO:0043229 intracellular organelle; GO:0016020 membrane; GO:0042175 nuclear outer membrane-endoplasmic reticulum membrane network; GO:0031226 intrinsic component of plasma membrane; GO:0005783 endoplasmic reticulum; GO:0070069 cytochrome complex; GO:0071944 cell periphery; GO:0044446 intracellular organelle part; GO:0005737 cytoplasm; GO:0032991 macromolecular complex; GO:0031224 intrinsic compon…	GO:0046982 protein heterodimerization activity; GO:0016758 transferase activity, transferring hexosyl groups; GO:0046983 protein dimerization activity; GO:0005501 retinoid binding; GO:0043167 ion binding; GO:0043177 organic acid binding; GO:0008194 UDP-glycosyltransferase activity; GO:0005515 protein binding; GO:0019840 isoprenoid binding; GO:0033293 monocarboxylic acid binding; GO:0098772 molecu…			GC	KOG1192	UDP-glucuronosyl and UDP-glucosyl transferase
Q64282	Specific	cytoplasm	K14217	IFIT1; interferon-induced protein with tetratricopeptide repeats 1	mmu05160 Hepatitis C	GO:0035456 response to interferon-beta; GO:0002252 immune effector process; GO:0071310 cellular response to organic substance; GO:0098542 defense response to other organism; GO:0035458 cellular response to interferon-beta; GO:0043207 response to external biotic stimulus; GO:0044764 multi-organism cellular process; GO:0050896 response to stimulus; GO:0071345 cellular response to cytokine stimulus;…	GO:0044424 intracellular part; GO:0005623 cell; GO:0044464 cell part; GO:0005622 intracellular; GO:0005737 cytoplasm;	GO:0097159 organic cyclic compound binding; GO:1901363 heterocyclic compound binding; GO:0003723 RNA binding; GO:0005515 protein binding; GO:0005488 binding; GO:0003676 nucleic acid binding;	IPR011990; IPR013026;	Tetratricopeptide-like helical domain; Tetratricopeptide repeat-containing domain;	R	KOG1124	FOG: TPR repeat
Q64435	Specific	plasma membrane	K00699	UGT; glucuronosyltransferase [EC:2.4.1.17]	mmu00040 Pentose and glucuronate interconversions; mmu00053 Ascorbate and aldarate metabolism; mmu00140 Steroid hormone biosynthesis; mmu00830 Retinol metabolism; mmu00860 Porphyrin and chlorophyll metabolism; mmu00980 Metabolism of xenobiotics by cytochrome P450; mmu00982 Drug metabolism - cytochrome P450; mmu00983 Drug metabolism - other enzymes; mmu01100 Metabolic pathways; mmu05204 Chemical c…	GO:0071466 cellular response to xenobiotic stimulus; GO:0051716 cellular response to stimulus; GO:0044281 small molecule metabolic process; GO:0044763 single-organism cellular process; GO:0044699 single-organism process; GO:0050896 response to stimulus; GO:0005975 carbohydrate metabolic process; GO:0044238 primary metabolic process; GO:0044237 cellular metabolic process; GO:0006063 uronic acid me…	GO:0016020 membrane; GO:0042175 nuclear outer membrane-endoplasmic reticulum membrane network; GO:0044421 extracellular region part; GO:0005783 endoplasmic reticulum; GO:0031090 organelle membrane; GO:0031982 vesicle; GO:0005737 cytoplasm; GO:0031224 intrinsic component of membrane; GO:0044424 intracellular part; GO:0005623 cell; GO:0044422 organelle part; GO:0005740 mitochondrial envelope; GO:00…	GO:0042802 identical protein binding; GO:0015020 glucuronosyltransferase activity; GO:0016758 transferase activity, transferring hexosyl groups; GO:0046982 protein heterodimerization activity; GO:0003824 catalytic activity; GO:0042803 protein homodimerization activity; GO:0005488 binding; GO:0046983 protein dimerization activity; GO:0008194 UDP-glycosyltransferase activity; GO:0005515 protein bin…			GC	KOG1192	UDP-glucuronosyl and UDP-glucosyl transferase
Q64458	Specific	endoplasmic reticulum	K07413	CYP2C; cytochrome P450 family 2 subfamily C [EC:1.14.14.1]	mmu00140 Steroid hormone biosynthesis; mmu00590 Arachidonic acid metabolism; mmu00591 Linoleic acid metabolism; mmu00830 Retinol metabolism; mmu01100 Metabolic pathways; mmu04726 Serotonergic synapse; mmu04750 Inflammatory mediator regulation of TRP channels; mmu05204 Chemical carcinogenesis	GO:0033559 unsaturated fatty acid metabolic process; GO:0019369 arachidonic acid metabolic process; GO:0055114 oxidation-reduction process; GO:0044281 small molecule metabolic process; GO:0044763 single-organism cellular process; GO:1901568 fatty acid derivative metabolic process; GO:0044699 single-organism process; GO:0044255 cellular lipid metabolic process; GO:0006631 fatty acid metabolic proc…	GO:0043229 intracellular organelle; GO:0016020 membrane; GO:0042175 nuclear outer membrane-endoplasmic reticulum membrane network; GO:0005783 endoplasmic reticulum; GO:0031090 organelle membrane; GO:0044446 intracellular organelle part; GO:0005737 cytoplasm; GO:0012505 endomembrane system; GO:0044424 intracellular part; GO:0005623 cell; GO:0044422 organelle part; GO:0043231 intracellular membrane…	GO:0016725 oxidoreductase activity, acting on CH or CH2 groups; GO:0008391 arachidonic acid monooxygenase activity; GO:0005506 iron ion binding; GO:0101020 estrogen 16-alpha-hydroxylase activity; GO:0008392 arachidonic acid epoxygenase activity; GO:0043167 ion binding; GO:0034875 caffeine oxidase activity; GO:0016705 oxidoreductase activity, acting on paired donors, with incorporation or reductio…			Q	KOG0156	Cytochrome P450 CYP2 subfamily
Q64459	Specific	endoplasmic reticulum	K07424	CYP3A; cytochrome P450 family 3 subfamily A [EC:1.14.14.1]	mmu00140 Steroid hormone biosynthesis; mmu00591 Linoleic acid metabolism; mmu00830 Retinol metabolism; mmu01100 Metabolic pathways; mmu05204 Chemical carcinogenesis	GO:0044699 single-organism process; GO:0008152 metabolic process; GO:0055114 oxidation-reduction process; GO:0044710 single-organism metabolic process;	GO:0016020 membrane; GO:0043229 intracellular organelle; GO:0042175 nuclear outer membrane-endoplasmic reticulum membrane network; GO:0005783 endoplasmic reticulum; GO:0031090 organelle membrane; GO:0044446 intracellular organelle part; GO:0005737 cytoplasm; GO:0012505 endomembrane system; GO:0044424 intracellular part; GO:0005623 cell; GO:0044422 organelle part; GO:0043226 organelle; GO:0043231 …	GO:0005506 iron ion binding; GO:0101020 estrogen 16-alpha-hydroxylase activity; GO:0043167 ion binding; GO:0016705 oxidoreductase activity, acting on paired donors, with incorporation or reduction of molecular oxygen; GO:0016491 oxidoreductase activity; GO:1901363 heterocyclic compound binding; GO:0097159 organic cyclic compound binding; GO:0008395 steroid hydroxylase activity; GO:0020037 heme bi…			Q	KOG0158	Cytochrome P450 CYP3/CYP5/CYP6/CYP9 subfamilies
Q64516	Specific	peroxisome	K00864	glpK, GK; glycerol kinase [EC:2.7.1.30]	mmu00561 Glycerolipid metabolism; mmu01100 Metabolic pathways; mmu03320 PPAR signaling pathway	GO:0050794 regulation of cellular process; GO:0016310 phosphorylation; GO:0065008 regulation of biological quality; GO:0046486 glycerolipid metabolic process; GO:1901615 organic hydroxy compound metabolic process; GO:0006066 alcohol metabolic process; GO:0044275 cellular carbohydrate catabolic process; GO:0042593 glucose homeostasis; GO:0006071 glycerol metabolic process; GO:0044699 single-organi…	GO:0043229 intracellular organelle; GO:0016020 membrane; GO:0019867 outer membrane; GO:0044429 mitochondrial part; GO:0098588 bounding membrane of organelle; GO:0031090 organelle membrane; GO:0005741 mitochondrial outer membrane; GO:0005737 cytoplasm; GO:0044446 intracellular organelle part; GO:0031967 organelle envelope; GO:0044424 intracellular part; GO:0005829 cytosol; GO:0005623 cell; GO:0044…	GO:0005524 ATP binding; GO:0004370 glycerol kinase activity; GO:1901265 nucleoside phosphate binding; GO:0016773 phosphotransferase activity, alcohol group as acceptor; GO:0001882 nucleoside binding; GO:0043167 ion binding; GO:0000166 nucleotide binding; GO:0097159 organic cyclic compound binding; GO:1901363 heterocyclic compound binding; GO:0032549 ribonucleoside binding; GO:0097367 carbohydrate…	IPR018484; IPR018485;	Carbohydrate kinase, FGGY, N-terminal; Carbohydrate kinase, FGGY, C-terminal;	G	KOG2517	Ribulose kinase and related carbohydrate kinases
Q64G17	Specific	cytoplasm	K18646	ANP32A_C_D; acidic leucine-rich nuclear phosphoprotein 32 family member A/C/D				GO:0005515 protein binding; GO:0005488 binding;	IPR032675;	Leucine-rich repeat domain, L domain-like;	DR	KOG2739	Leucine-rich acidic nuclear protein
Q68FD5	Specific	cytoplasm	K04646	CLTC; clathrin heavy chain	mmu04142 Lysosome; mmu04144 Endocytosis; mmu04721 Synaptic vesicle cycle; mmu04961 Endocrine and other factor-regulated calcium reabsorption; mmu05016 Huntington disease; mmu05100 Bacterial invasion of epithelial cells	GO:0044085 cellular component biogenesis; GO:0001649 osteoblast differentiation; GO:0031623 receptor internalization; GO:0032885 regulation of polysaccharide biosynthetic process; GO:0051129 negative regulation of cellular component organization; GO:0007067 mitotic nuclear division; GO:0048869 cellular developmental process; GO:0044699 single-organism process; GO:0006914 autophagy; GO:0060236 reg…	GO:0016020 membrane; GO:0044421 extracellular region part; GO:1990498 mitotic spindle microtubule; GO:0031090 organelle membrane; GO:0005737 cytoplasm; GO:0044433 cytoplasmic vesicle part; GO:0032991 macromolecular complex; GO:0005623 cell; GO:0099080 supramolecular complex; GO:0044422 organelle part; GO:0043228 non-membrane-bounded organelle; GO:0070062 extracellular exosome; GO:0005925 focal ad…	GO:0097159 organic cyclic compound binding; GO:1901363 heterocyclic compound binding; GO:0003723 RNA binding; GO:0030276 clathrin binding; GO:0003725 double-stranded RNA binding; GO:0005488 binding; GO:0003676 nucleic acid binding; GO:0019901 protein kinase binding; GO:0005515 protein binding; GO:0019900 kinase binding; GO:0005198 structural molecule activity; GO:0019899 enzyme binding; GO:003205…	IPR016025; IPR015348; IPR011990; IPR016024; IPR001473;	Clathrin, heavy chain, linker/propeller domain; Clathrin, heavy chain, linker, core motif; Tetratricopeptide-like helical domain; Armadillo-type fold; Clathrin, heavy chain, propeller, N-terminal;	U	KOG0985	Vesicle coat protein clathrin, heavy chain
Q6A0A9	Specific	nucleus					GO:0043229 intracellular organelle; GO:0016020 membrane; GO:0071944 cell periphery; GO:0005737 cytoplasm; GO:0044424 intracellular part; GO:0005829 cytosol; GO:0005623 cell; GO:0005886 plasma membrane; GO:0043231 intracellular membrane-bounded organelle; GO:0043226 organelle; GO:0005634 nucleus; GO:0005622 intracellular; GO:0044464 cell part; GO:0043227 membrane-bounded organelle; GO:0044444 cyto…	GO:0097159 organic cyclic compound binding; GO:1901363 heterocyclic compound binding; GO:0003723 RNA binding; GO:0005488 binding; GO:0003676 nucleic acid binding;	IPR029060;	PIN domain-like;
Q6NZJ6	Specific	nucleus	K03260	EIF4G; translation initiation factor 4G	mmu03013 RNA transport; mmu05416 Viral myocarditis	GO:0065008 regulation of biological quality; GO:0006518 peptide metabolic process; GO:0032270 positive regulation of cellular protein metabolic process; GO:0010608 posttranscriptional regulation of gene expression; GO:1905616 regulation of miRNA mediated inhibition of translation; GO:0010564 regulation of cell cycle process; GO:0044237 cellular metabolic process; GO:0050807 regulation of synapse …	GO:0043229 intracellular organelle; GO:0016020 membrane; GO:0030054 cell junction; GO:0005737 cytoplasm; GO:0070161 anchoring junction; GO:0032991 macromolecular complex; GO:0044424 intracellular part; GO:0005913 cell-cell adherens junction; GO:0005623 cell; GO:0005911 cell-cell junction; GO:0043226 organelle; GO:0043231 intracellular membrane-bounded organelle; GO:0005634 nucleus; GO:0005622 int…	GO:1901265 nucleoside phosphate binding; GO:0003743 translation initiation factor activity; GO:0005515 protein binding; GO:1901363 heterocyclic compound binding; GO:0097159 organic cyclic compound binding; GO:0098641 cadherin binding involved in cell-cell adhesion; GO:0003729 mRNA binding; GO:0032553 ribonucleotide binding; GO:0031369 translation initiation factor binding; GO:0005488 binding; GO:…	IPR003307; IPR003891; IPR003890; IPR016024; IPR016021;	W2 domain; Initiation factor eIF-4 gamma, MA3; MIF4G-like, type 3; Armadillo-type fold; MIF4G-like domain;	J	KOG0401	Translation initiation factor 4F, ribosome/mRNA-bridging subunit (eIF-4G)
Q6PB66	Specific	mitochondria	K17964	LRPPRC; leucine-rich PPR motif-containing protein, mitochondrial		GO:0050658 RNA transport; GO:0010608 posttranscriptional regulation of gene expression; GO:0097659 nucleic acid-templated transcription; GO:0009058 biosynthetic process; GO:0000961 negative regulation of mitochondrial RNA catabolic process; GO:0044237 cellular metabolic process; GO:0009451 RNA modification; GO:0051253 negative regulation of RNA metabolic process; GO:0000960 regulation of mitochon…	GO:0016020 membrane; GO:0019867 outer membrane; GO:0042175 nuclear outer membrane-endoplasmic reticulum membrane network; GO:0005874 microtubule; GO:0031090 organelle membrane; GO:0005737 cytoplasm; GO:0032991 macromolecular complex; GO:0099512 supramolecular fiber; GO:0044424 intracellular part; GO:0099080 supramolecular complex; GO:0005623 cell; GO:0044422 organelle part; GO:0005640 nuclear out…	GO:0003677 DNA binding; GO:0003723 RNA binding; GO:0031625 ubiquitin protein ligase binding; GO:0015631 tubulin binding; GO:0003697 single-stranded DNA binding; GO:0016787 hydrolase activity; GO:0048487 beta-tubulin binding; GO:0005515 protein binding; GO:1901363 heterocyclic compound binding; GO:0097159 organic cyclic compound binding; GO:0008092 cytoskeletal protein binding; GO:0003824 catalyti…	IPR011990;	Tetratricopeptide-like helical domain;	A	KOG4318	Bicoid mRNA stability factor
Q78PY7	Specific	cytoplasm	K15979	SND1; staphylococcal nuclease domain-containing protein 1	mmu05203 Viral carcinogenesis	GO:0001649 osteoblast differentiation; GO:0097659 nucleic acid-templated transcription; GO:0048869 cellular developmental process; GO:0044699 single-organism process; GO:0009058 biosynthetic process; GO:0044237 cellular metabolic process; GO:0022610 biological adhesion; GO:2001141 regulation of RNA biosynthetic process; GO:0008152 metabolic process; GO:1901361 organic cyclic compound catabolic pr…	GO:0016020 membrane; GO:0044421 extracellular region part; GO:0031410 cytoplasmic vesicle; GO:0030054 cell junction; GO:0005737 cytoplasm; GO:0031982 vesicle; GO:0032991 macromolecular complex; GO:0044424 intracellular part; GO:0005913 cell-cell adherens junction; GO:0005911 cell-cell junction; GO:0005623 cell; GO:0048770 pigment granule; GO:0070062 extracellular exosome; GO:0005622 intracellular…	GO:0003723 RNA binding; GO:0016787 hydrolase activity; GO:0005515 protein binding; GO:0098632 protein binding involved in cell-cell adhesion; GO:1901363 heterocyclic compound binding; GO:0097159 organic cyclic compound binding; GO:0050839 cell adhesion molecule binding; GO:0098641 cadherin binding involved in cell-cell adhesion; GO:0098631 protein binding involved in cell adhesion; GO:0003824 cat…	IPR016071; IPR002999;	Staphylococcal nuclease (SNase-like), OB-fold; Tudor domain;	K	KOG2039	Transcriptional coactivator p100
Q791V5	Specific	extracellular	K17885	MTCH; mitochondrial carrier		GO:0009116 nucleoside metabolic process; GO:0010941 regulation of cell death; GO:0065008 regulation of biological quality; GO:0032270 positive regulation of cellular protein metabolic process; GO:0045980 negative regulation of nucleotide metabolic process; GO:0044237 cellular metabolic process; GO:0045978 negative regulation of nucleoside metabolic process; GO:0008152 metabolic process; GO:000609…	GO:0016020 membrane; GO:0044421 extracellular region part; GO:0019867 outer membrane; GO:0031090 organelle membrane; GO:0031982 vesicle; GO:0005737 cytoplasm; GO:0031224 intrinsic component of membrane; GO:0044424 intracellular part; GO:0005623 cell; GO:0044422 organelle part; GO:0070062 extracellular exosome; GO:0005740 mitochondrial envelope; GO:0044425 membrane part; GO:0005622 intracellular; …		IPR023395;	Mitochondrial carrier domain;	R	KOG2745	Mitochondrial carrier protein
Q80UM7	Specific	plasma membrane	K01228	GCS1; mannosyl-oligosaccharide glucosidase [EC:3.2.1.106]	mmu00510 N-Glycan biosynthesis; mmu01100 Metabolic pathways; mmu04141 Protein processing in endoplasmic reticulum	GO:0044723 single-organism carbohydrate metabolic process; GO:0008152 metabolic process; GO:0044710 single-organism metabolic process; GO:0044699 single-organism process; GO:0009311 oligosaccharide metabolic process; GO:0044238 primary metabolic process; GO:0005975 carbohydrate metabolic process; GO:0071704 organic substance metabolic process;	GO:0043229 intracellular organelle; GO:0016020 membrane; GO:0042175 nuclear outer membrane-endoplasmic reticulum membrane network; GO:0005783 endoplasmic reticulum; GO:0044421 extracellular region part; GO:0044446 intracellular organelle part; GO:0005737 cytoplasm; GO:0031982 vesicle; GO:0031224 intrinsic component of membrane; GO:0012505 endomembrane system; GO:0044424 intracellular part; GO:000…	GO:0004573 mannosyl-oligosaccharide glucosidase activity; GO:0015926 glucosidase activity; GO:0004553 hydrolase activity, hydrolyzing O-glycosyl compounds; GO:0016787 hydrolase activity; GO:0003824 catalytic activity; GO:0016798 hydrolase activity, acting on glycosyl bonds;	IPR031631; IPR031335; IPR008928;	Glycosyl hydrolase family 63, N-terminal; Glycosyl hydrolase family 63, C-terminal; Six-hairpin glycosidase-like;	G	KOG2161	Glucosidase I
Q80XL6	Specific	nucleus	K11730	ACAD11; acyl-CoA dehydrogenase family member 11		GO:0034440 lipid oxidation; GO:0044699 single-organism process; GO:0044255 cellular lipid metabolic process; GO:0044237 cellular metabolic process; GO:0071704 organic substance metabolic process; GO:0008152 metabolic process; GO:0030258 lipid modification; GO:0044248 cellular catabolic process; GO:0032787 monocarboxylic acid metabolic process; GO:0009987 cellular process; GO:0006629 lipid metabol…	GO:0016020 membrane; GO:0043229 intracellular organelle; GO:0044429 mitochondrial part; GO:0031090 organelle membrane; GO:0005777 peroxisome; GO:0044446 intracellular organelle part; GO:0031967 organelle envelope; GO:0005737 cytoplasm; GO:0044424 intracellular part; GO:0005623 cell; GO:0044422 organelle part; GO:0005739 mitochondrion; GO:0005740 mitochondrial envelope; GO:0043231 intracellular me…	GO:1901265 nucleoside phosphate binding; GO:0050660 flavin adenine dinucleotide binding; GO:0043167 ion binding; GO:0000166 nucleotide binding; GO:0048037 cofactor binding; GO:0016491 oxidoreductase activity; GO:0016627 oxidoreductase activity, acting on the CH-CH group of donors; GO:1901363 heterocyclic compound binding; GO:0097159 organic cyclic compound binding; GO:0003824 catalytic activity; …	IPR009100; IPR013786; IPR006091; IPR002575; IPR009075; IPR011009;	Acyl-CoA dehydrogenase/oxidase, N-terminal and middle domain; Acyl-CoA dehydrogenase/oxidase, N-terminal; Acyl-CoA oxidase/dehydrogenase, central domain; Aminoglycoside phosphotransferase; Acyl-CoA dehydrogenase/oxidase C-terminal; Protein kinase-like domain;	R	KOG1469	Predicted acyl-CoA dehydrogenase
Q8BFR5	Specific	mitochondria	K02358	tuf, TUFM; elongation factor Tu		GO:0006518 peptide metabolic process; GO:0045471 response to ethanol; GO:1901700 response to oxygen-containing compound; GO:0044267 cellular protein metabolic process; GO:0009058 biosynthetic process; GO:0050896 response to stimulus; GO:1901566 organonitrogen compound biosynthetic process; GO:0044237 cellular metabolic process; GO:0071704 organic substance metabolic process; GO:0008152 metabolic …	GO:0016020 membrane; GO:0044421 extracellular region part; GO:0031090 organelle membrane; GO:0005737 cytoplasm; GO:0031982 vesicle; GO:0044424 intracellular part; GO:0005623 cell; GO:0044422 organelle part; GO:0043228 non-membrane-bounded organelle; GO:0005740 mitochondrial envelope; GO:0031974 membrane-enclosed lumen; GO:0070062 extracellular exosome; GO:0070013 intracellular organelle lumen; GO…	GO:1901265 nucleoside phosphate binding; GO:0003746 translation elongation factor activity; GO:0016817 hydrolase activity, acting on acid anhydrides; GO:0016787 hydrolase activity; GO:1901363 heterocyclic compound binding; GO:0097159 organic cyclic compound binding; GO:0016462 pyrophosphatase activity; GO:0032553 ribonucleotide binding; GO:0003824 catalytic activity; GO:0005488 binding; GO:003255…	IPR004160; IPR004161; IPR027417; IPR009001; IPR000795; IPR009000; IPR033720;	Translation elongation factor EFTu/EF1A, C-terminal; Translation elongation factor EFTu-like, domain 2; P-loop containing nucleoside triphosphate hydrolase; Translation elongation factor EF1A/initiation factor IF2gamma, C-terminal; Transcription factor, GTP-binding domain; Translation protein, beta-barrel domain; Elongation factor Tu, domain 2;	J	KOG0460	Mitochondrial translation elongation factor Tu
Q8BGH2	Specific	cytoplasm	K07277	SAM50, TOB55, bamA; outer membrane protein insertion porin family		GO:0044085 cellular component biogenesis; GO:0042407 cristae formation; GO:0016043 cellular component organization; GO:0046907 intracellular transport; GO:0072594 establishment of protein localization to organelle; GO:0007006 mitochondrial membrane organization; GO:0017038 protein import; GO:0006839 mitochondrial transport; GO:0044699 single-organism process; GO:0015031 protein transport; GO:0051…	GO:0016020 membrane; GO:0019867 outer membrane; GO:0044421 extracellular region part; GO:0031090 organelle membrane; GO:0098796 membrane protein complex; GO:0005737 cytoplasm; GO:0031982 vesicle; GO:0031224 intrinsic component of membrane; GO:0032991 macromolecular complex; GO:0098798 mitochondrial protein complex; GO:0044424 intracellular part; GO:0044455 mitochondrial membrane part; GO:0005623 …	GO:0005515 protein binding; GO:0005488 binding;	IPR000184;	Bacterial surface antigen (D15);	R	KOG2602	Predicted cell surface protein homologous to bacterial outer membrane proteins
Q8BGZ7	Specific	mitochondria	K07605	KRT2; type II keratin, basic		GO:0032502 developmental process; GO:0002244 hematopoietic progenitor cell differentiation; GO:0044707 single-multicellular organism process; GO:0048731 system development; GO:0048869 cellular developmental process; GO:0044763 single-organism cellular process; GO:0044699 single-organism process; GO:0002520 immune system development; GO:0002376 immune system process; GO:0032501 multicellular organ…	GO:0043229 intracellular organelle; GO:0099513 polymeric cytoskeletal fiber; GO:0044421 extracellular region part; GO:0043232 intracellular non-membrane-bounded organelle; GO:0044430 cytoskeletal part; GO:0044446 intracellular organelle part; GO:0031982 vesicle; GO:0044424 intracellular part; GO:0099512 supramolecular fiber; GO:0099080 supramolecular complex; GO:0005623 cell; GO:0005576 extracell…	GO:0005198 structural molecule activity;	IPR032444;	Keratin type II head;	O	KOG4642	Chaperone-dependent E3 ubiquitin protein ligase (contains TPR repeats)
Q8BH00	Specific	cytoplasm	K23234		mmu00380 Tryptophan metabolism; mmu01100 Metabolic pathways	GO:0065008 regulation of biological quality; GO:0016053 organic acid biosynthetic process; GO:0042904 9-cis-retinoic acid biosynthetic process; GO:0042573 retinoic acid metabolic process; GO:0044699 single-organism process; GO:0009058 biosynthetic process; GO:0044255 cellular lipid metabolic process; GO:0044237 cellular metabolic process; GO:0008610 lipid biosynthetic process; GO:0071704 organic …	GO:0070062 extracellular exosome; GO:0043226 organelle; GO:0044421 extracellular region part; GO:0005622 intracellular; GO:0044464 cell part; GO:0005737 cytoplasm; GO:0031982 vesicle; GO:1903561 extracellular vesicle; GO:0044424 intracellular part; GO:0005623 cell; GO:0043227 membrane-bounded organelle; GO:0005576 extracellular region; GO:0043230 extracellular organelle;	GO:0016620 oxidoreductase activity, acting on the aldehyde or oxo group of donors, NAD or NADP as acceptor; GO:0001758 retinal dehydrogenase activity; GO:0003824 catalytic activity; GO:0016491 oxidoreductase activity; GO:0016903 oxidoreductase activity, acting on the aldehyde or oxo group of donors;	IPR016161; IPR015590; IPR016162; IPR016163;	Aldehyde/histidinol dehydrogenase; Aldehyde dehydrogenase domain; Aldehyde dehydrogenase N-terminal domain; Aldehyde dehydrogenase, C-terminal;	C	KOG2450	Aldehyde dehydrogenase
Q8BP47	Specific	cytoplasm	K01893	NARS, asnS; asparaginyl-tRNA synthetase [EC:6.1.1.22]	mmu00970 Aminoacyl-tRNA biosynthesis	GO:0006518 peptide metabolic process; GO:0006725 cellular aromatic compound metabolic process; GO:0044267 cellular protein metabolic process; GO:0044699 single-organism process; GO:0009058 biosynthetic process; GO:0006421 asparaginyl-tRNA aminoacylation; GO:1901566 organonitrogen compound biosynthetic process; GO:0043039 tRNA aminoacylation; GO:0044237 cellular metabolic process; GO:0071704 organ…	GO:0043229 intracellular organelle; GO:0044421 extracellular region part; GO:0005737 cytoplasm; GO:0031982 vesicle; GO:0044424 intracellular part; GO:0005829 cytosol; GO:0005623 cell; GO:0005576 extracellular region; GO:0005739 mitochondrion; GO:0043231 intracellular membrane-bounded organelle; GO:0043226 organelle; GO:0070062 extracellular exosome; GO:0005622 intracellular; GO:0044464 cell part;…	GO:0016876 ligase activity, forming aminoacyl-tRNA and related compounds; GO:0005524 ATP binding; GO:1901265 nucleoside phosphate binding; GO:0016875 ligase activity, forming carbon-oxygen bonds; GO:0016874 ligase activity; GO:0001882 nucleoside binding; GO:0043167 ion binding; GO:0000166 nucleotide binding; GO:0097159 organic cyclic compound binding; GO:1901363 heterocyclic compound binding; GO:…	IPR012340; IPR004364; IPR004365; IPR006195;	Nucleic acid-binding, OB-fold; Aminoacyl-tRNA synthetase, class II (D/K/N); OB-fold nucleic acid binding domain, AA-tRNA synthetase-type; Aminoacyl-tRNA synthetase, class II;	J	KOG0555	Asparaginyl-tRNA synthetase
Q8BP67	Specific	cytoplasm				GO:0044085 cellular component biogenesis; GO:0031290 retinal ganglion cell axon guidance; GO:0022613 ribonucleoprotein complex biogenesis; GO:0006518 peptide metabolic process; GO:0022618 ribonucleoprotein complex assembly; GO:0007067 mitotic nuclear division; GO:0048869 cellular developmental process; GO:0048666 neuron development; GO:0032989 cellular component morphogenesis; GO:0022008 neurogen…	GO:0016020 membrane; GO:0044421 extracellular region part; GO:0030054 cell junction; GO:0031982 vesicle; GO:0005737 cytoplasm; GO:0032991 macromolecular complex; GO:0044424 intracellular part; GO:0005913 cell-cell adherens junction; GO:0005911 cell-cell junction; GO:0005623 cell; GO:0044422 organelle part; GO:0043228 non-membrane-bounded organelle; GO:0070062 extracellular exosome; GO:0044391 rib…	GO:0097159 organic cyclic compound binding; GO:1901363 heterocyclic compound binding; GO:0098641 cadherin binding involved in cell-cell adhesion; GO:0050839 cell adhesion molecule binding; GO:0003723 RNA binding; GO:0098631 protein binding involved in cell adhesion; GO:0005488 binding; GO:0045296 cadherin binding; GO:0003676 nucleic acid binding; GO:0005515 protein binding; GO:0098632 protein bin…	IPR011017;	TRASH domain;	J	KOG1722	60s ribosomal protein L24
Q8BW75	Specific	cytoplasm	K00274	MAO, aofH; monoamine oxidase [EC:1.4.3.4]	mmu00260 Glycine, serine and threonine metabolism; mmu00330 Arginine and proline metabolism; mmu00340 Histidine metabolism; mmu00350 Tyrosine metabolism; mmu00360 Phenylalanine metabolism; mmu00380 Tryptophan metabolism; mmu00982 Drug metabolism - cytochrome P450; mmu01100 Metabolic pathways; mmu04726 Serotonergic synapse; mmu04728 Dopaminergic synapse; mmu05030 Cocaine addiction; mmu05031 Amphet…	GO:0001505 regulation of neurotransmitter levels; GO:0065008 regulation of biological quality; GO:0007420 brain development; GO:0042053 regulation of dopamine metabolic process; GO:0051046 regulation of secretion; GO:0044699 single-organism process; GO:0045915 positive regulation of catecholamine metabolic process; GO:0044237 cellular metabolic process; GO:0009607 response to biotic stimulus; GO:…	GO:0016020 membrane; GO:0044421 extracellular region part; GO:0019867 outer membrane; GO:0031090 organelle membrane; GO:0031982 vesicle; GO:0005737 cytoplasm; GO:0031224 intrinsic component of membrane; GO:0044424 intracellular part; GO:0005623 cell; GO:0044422 organelle part; GO:0070062 extracellular exosome; GO:0005740 mitochondrial envelope; GO:0044425 membrane part; GO:0005622 intracellular; …	GO:1901265 nucleoside phosphate binding; GO:0050660 flavin adenine dinucleotide binding; GO:0046983 protein dimerization activity; GO:0043167 ion binding; GO:0005515 protein binding; GO:0000166 nucleotide binding; GO:0048037 cofactor binding; GO:0016491 oxidoreductase activity; GO:1901363 heterocyclic compound binding; GO:0097159 organic cyclic compound binding; GO:0042802 identical protein bindi…	IPR002937; IPR023753;	Amine oxidase; FAD/NAD(P)-binding domain;	Q	KOG0029	Amine oxidase
Q8BWQ1	Specific	plasma membrane	K00699	UGT; glucuronosyltransferase [EC:2.4.1.17]	mmu00040 Pentose and glucuronate interconversions; mmu00053 Ascorbate and aldarate metabolism; mmu00140 Steroid hormone biosynthesis; mmu00830 Retinol metabolism; mmu00860 Porphyrin and chlorophyll metabolism; mmu00980 Metabolism of xenobiotics by cytochrome P450; mmu00982 Drug metabolism - cytochrome P450; mmu00983 Drug metabolism - other enzymes; mmu01100 Metabolic pathways; mmu05204 Chemical c…	GO:0044281 small molecule metabolic process; GO:0044763 single-organism cellular process; GO:0044699 single-organism process; GO:0005975 carbohydrate metabolic process; GO:0044238 primary metabolic process; GO:0044237 cellular metabolic process; GO:0006063 uronic acid metabolic process; GO:0071704 organic substance metabolic process; GO:0044723 single-organism carbohydrate metabolic process; GO:0…	GO:0016020 membrane; GO:0043231 intracellular membrane-bounded organelle; GO:0043226 organelle; GO:0043229 intracellular organelle; GO:0044425 membrane part; GO:0044464 cell part; GO:0005622 intracellular; GO:0031224 intrinsic component of membrane; GO:0044424 intracellular part; GO:0043227 membrane-bounded organelle; GO:0005623 cell; GO:0016021 integral component of membrane;	GO:0008194 UDP-glycosyltransferase activity; GO:0016757 transferase activity, transferring glycosyl groups; GO:0015020 glucuronosyltransferase activity; GO:0016758 transferase activity, transferring hexosyl groups; GO:0003824 catalytic activity; GO:0016740 transferase activity;			GC	KOG1192	UDP-glucuronosyl and UDP-glucosyl transferase
Q8C0C7	Specific	cytoplasm,nucleus	K01889	FARSA, pheS; phenylalanyl-tRNA synthetase alpha chain [EC:6.1.1.20]	mmu00970 Aminoacyl-tRNA biosynthesis	GO:0044085 cellular component biogenesis; GO:0016043 cellular component organization; GO:0006518 peptide metabolic process; GO:0006725 cellular aromatic compound metabolic process; GO:0044267 cellular protein metabolic process; GO:0044699 single-organism process; GO:0009058 biosynthetic process; GO:1901566 organonitrogen compound biosynthetic process; GO:0043039 tRNA aminoacylation; GO:0044237 ce…	GO:0016020 membrane; GO:1902494 catalytic complex; GO:0044464 cell part; GO:0005622 intracellular; GO:0009328 phenylalanine-tRNA ligase complex; GO:0005737 cytoplasm; GO:0032991 macromolecular complex; GO:0044424 intracellular part; GO:0005623 cell; GO:0044444 cytoplasmic part;	GO:0016876 ligase activity, forming aminoacyl-tRNA and related compounds; GO:0003723 RNA binding; GO:0005524 ATP binding; GO:1901265 nucleoside phosphate binding; GO:0016875 ligase activity, forming carbon-oxygen bonds; GO:0016874 ligase activity; GO:0001882 nucleoside binding; GO:0043167 ion binding; GO:0004826 phenylalanine-tRNA ligase activity; GO:0000166 nucleotide binding; GO:1901363 heteroc…	IPR011991; IPR002319; IPR006195;	Winged helix-turn-helix DNA-binding domain; Phenylalanyl-tRNA synthetase; Aminoacyl-tRNA synthetase, class II;	J	KOG2784	Phenylalanyl-tRNA synthetase, beta subunit
Q8CAQ8	Specific	mitochondria	K17785	IMMT, FCJ1, MNOS2; mitofilin		GO:0042407 cristae formation; GO:0016043 cellular component organization; GO:0065008 regulation of biological quality; GO:0072503 cellular divalent inorganic cation homeostasis; GO:0007006 mitochondrial membrane organization; GO:0030003 cellular cation homeostasis; GO:0044699 single-organism process; GO:0055082 cellular chemical homeostasis; GO:0042592 homeostatic process; GO:0055080 cation homeo…	GO:0016020 membrane; GO:0098800 inner mitochondrial membrane protein complex; GO:0031090 organelle membrane; GO:0098796 membrane protein complex; GO:0005737 cytoplasm; GO:0031305 integral component of mitochondrial inner membrane; GO:0032991 macromolecular complex; GO:0031224 intrinsic component of membrane; GO:0098798 mitochondrial protein complex; GO:0044424 intracellular part; GO:0044455 mitoc…	GO:0097159 organic cyclic compound binding; GO:1901363 heterocyclic compound binding; GO:0003723 RNA binding; GO:0005515 protein binding; GO:0005488 binding; GO:0003676 nucleic acid binding;			M	KOG1854	Mitochondrial inner membrane protein (mitofilin)
Q8CC88	Specific	cytoplasm					GO:0043226 organelle; GO:0043231 intracellular membrane-bounded organelle; GO:0043229 intracellular organelle; GO:0044464 cell part; GO:0005622 intracellular; GO:0005737 cytoplasm; GO:0044424 intracellular part; GO:0043227 membrane-bounded organelle; GO:0005623 cell; GO:0005576 extracellular region; GO:0005739 mitochondrion; GO:0044444 cytoplasmic part;	GO:0005524 ATP binding; GO:1901265 nucleoside phosphate binding; GO:0001882 nucleoside binding; GO:0043167 ion binding; GO:0016817 hydrolase activity, acting on acid anhydrides; GO:0016787 hydrolase activity; GO:0000166 nucleotide binding; GO:0017111 nucleoside-triphosphatase activity; GO:0016887 ATPase activity; GO:0097159 organic cyclic compound binding; GO:1901363 heterocyclic compound binding…	IPR003593; IPR011704; IPR027417; IPR002035;	AAA+ ATPase domain; ATPase, dynein-related, AAA domain; P-loop containing nucleoside triphosphate hydrolase; von Willebrand factor, type A;	R	KOG1808	AAA ATPase containing von Willebrand factor type A (vWA) domain
Q8CGC7	Specific	cytoplasm	K14163	EPRS; bifunctional glutamyl/prolyl-tRNA synthetase [EC:6.1.1.17 6.1.1.15]	mmu00860 Porphyrin and chlorophyll metabolism; mmu00970 Aminoacyl-tRNA biosynthesis; mmu01100 Metabolic pathways	GO:0006518 peptide metabolic process; GO:0010608 posttranscriptional regulation of gene expression; GO:0071346 cellular response to interferon-gamma; GO:0044699 single-organism process; GO:0009058 biosynthetic process; GO:0071345 cellular response to cytokine stimulus; GO:0044237 cellular metabolic process; GO:0008152 metabolic process; GO:0006520 cellular amino acid metabolic process; GO:0010558…	GO:0016020 membrane; GO:0044464 cell part; GO:0005622 intracellular; GO:0005737 cytoplasm; GO:0032991 macromolecular complex; GO:0044424 intracellular part; GO:1990904 ribonucleoprotein complex; GO:0030529 intracellular ribonucleoprotein complex; GO:0043234 protein complex; GO:0005623 cell; GO:0097452 GAIT complex; GO:0017101 aminoacyl-tRNA synthetase multienzyme complex;	GO:0016876 ligase activity, forming aminoacyl-tRNA and related compounds; GO:0003723 RNA binding; GO:0005524 ATP binding; GO:0035613 RNA stem-loop binding; GO:1901265 nucleoside phosphate binding; GO:0016875 ligase activity, forming carbon-oxygen bonds; GO:0004818 glutamate-tRNA ligase activity; GO:0001882 nucleoside binding; GO:0043167 ion binding; GO:0016874 ligase activity; GO:0005515 protein …	IPR002314; IPR020056; IPR000738; IPR006195; IPR009068; IPR004154; IPR017449; IPR020059; IPR016061; IPR020061; IPR004046; IPR020058; IPR011035; IPR014729; IPR033721; IPR010987;	Aminoacyl-tRNA synthetase, class II (G/ P/ S/T); Ribosomal protein L25/Gln-tRNA synthetase, beta-barrel domain; WHEP-TRS domain; Aminoacyl-tRNA synthetase, class II; S15/NS1, RNA-binding; Anticodon-binding; Prolyl-tRNA synthetase, class II; Glutamyl/glutaminyl-tRNA synthetase, class Ib, anti-codon binding domain; Proline-tRNA ligase, class II, C-terminal; Glutamyl/glutaminyl-tRNA synthetase, clas…	J	KOG1147	Glutamyl-tRNA synthetase
Q8CHQ9	Specific	plasma membrane	K20838	NAT8; N-acetyltransferase 8 [EC:2.3.1.80 2.3.1.-]	mmu00480 Glutathione metabolism; mmu01100 Metabolic pathways	GO:0050794 regulation of cellular process; GO:0032502 developmental process; GO:0044707 single-multicellular organism process; GO:0007162 negative regulation of cell adhesion; GO:0044699 single-organism process; GO:0048519 negative regulation of biological process; GO:0048523 negative regulation of cellular process; GO:0032501 multicellular organismal process; GO:0030155 regulation of cell adhesi…	GO:0043229 intracellular organelle; GO:0016020 membrane; GO:0005783 endoplasmic reticulum; GO:0005737 cytoplasm; GO:0031224 intrinsic component of membrane; GO:0012505 endomembrane system; GO:0044424 intracellular part; GO:0005623 cell; GO:0016021 integral component of membrane; GO:0043231 intracellular membrane-bounded organelle; GO:0043226 organelle; GO:0044425 membrane part; GO:0005622 intrace…	GO:0016746 transferase activity, transferring acyl groups; GO:0008080 N-acetyltransferase activity; GO:0016747 transferase activity, transferring acyl groups other than amino-acyl groups; GO:0003824 catalytic activity; GO:0016740 transferase activity; GO:0016407 acetyltransferase activity; GO:0016410 N-acyltransferase activity;	IPR000182; IPR016181;	GNAT domain; Acyl-CoA N-acyltransferase;	R	KOG3139	N-acetyltransferase
Q8CHT0	Specific	mitochondria	K00294	E1.2.1.88; 1-pyrroline-5-carboxylate dehydrogenase [EC:1.2.1.88]	mmu00250 Alanine, aspartate and glutamate metabolism; mmu00330 Arginine and proline metabolism; mmu01100 Metabolic pathways	GO:1901606 alpha-amino acid catabolic process; GO:0043648 dicarboxylic acid metabolic process; GO:0016053 organic acid biosynthetic process; GO:0044699 single-organism process; GO:0009058 biosynthetic process; GO:1901566 organonitrogen compound biosynthetic process; GO:0044237 cellular metabolic process; GO:0009084 glutamine family amino acid biosynthetic process; GO:0071704 organic substance met…	GO:0005759 mitochondrial matrix; GO:0043229 intracellular organelle; GO:0044429 mitochondrial part; GO:0005737 cytoplasm; GO:0044446 intracellular organelle part; GO:0044424 intracellular part; GO:0005623 cell; GO:0005739 mitochondrion; GO:0044422 organelle part; GO:0031974 membrane-enclosed lumen; GO:0043226 organelle; GO:0043231 intracellular membrane-bounded organelle; GO:0070013 intracellular…	GO:0016620 oxidoreductase activity, acting on the aldehyde or oxo group of donors, NAD or NADP as acceptor; GO:0016645 oxidoreductase activity, acting on the CH-NH group of donors; GO:0016646 oxidoreductase activity, acting on the CH-NH group of donors, NAD or NADP as acceptor; GO:0042802 identical protein binding; GO:0003824 catalytic activity; GO:0005488 binding; GO:0016903 oxidoreductase activ…	IPR016161; IPR015590; IPR016162; IPR016163;	Aldehyde/histidinol dehydrogenase; Aldehyde dehydrogenase domain; Aldehyde dehydrogenase N-terminal domain; Aldehyde dehydrogenase, C-terminal;	E	KOG2455	Delta-1-pyrroline-5-carboxylate dehydrogenase
Q8CIM7	Specific	endoplasmic reticulum	K07414	CYP2D; cytochrome P450 family 2 subfamily D [EC:1.14.14.1]	mmu00140 Steroid hormone biosynthesis; mmu04726 Serotonergic synapse	GO:0033559 unsaturated fatty acid metabolic process; GO:0019369 arachidonic acid metabolic process; GO:0055114 oxidation-reduction process; GO:0044281 small molecule metabolic process; GO:0044763 single-organism cellular process; GO:1901568 fatty acid derivative metabolic process; GO:0044699 single-organism process; GO:0044255 cellular lipid metabolic process; GO:0006631 fatty acid metabolic proc…	GO:0016020 membrane; GO:0043229 intracellular organelle; GO:0042175 nuclear outer membrane-endoplasmic reticulum membrane network; GO:0005783 endoplasmic reticulum; GO:0031090 organelle membrane; GO:0044446 intracellular organelle part; GO:0005737 cytoplasm; GO:0012505 endomembrane system; GO:0044424 intracellular part; GO:0005623 cell; GO:0044422 organelle part; GO:0043226 organelle; GO:0043231 …	GO:0005506 iron ion binding; GO:0043167 ion binding; GO:0016705 oxidoreductase activity, acting on paired donors, with incorporation or reduction of molecular oxygen; GO:0016491 oxidoreductase activity; GO:1901363 heterocyclic compound binding; GO:0097159 organic cyclic compound binding; GO:0020037 heme binding; GO:0046914 transition metal ion binding; GO:0003824 catalytic activity; GO:0005488 bi…			Q	KOG0156	Cytochrome P450 CYP2 subfamily
Q8JZU2	Specific	cytoplasm	K15100	SLC25A1, CTP; solute carrier family 25 (mitochondrial citrate transporter), member 1		GO:0006839 mitochondrial transport; GO:0044699 single-organism process; GO:0071702 organic substance transport; GO:0046942 carboxylic acid transport; GO:0015849 organic acid transport; GO:0051234 establishment of localization; GO:0006810 transport; GO:0006820 anion transport; GO:0055085 transmembrane transport; GO:0015711 organic anion transport; GO:0006842 tricarboxylic acid transport; GO:000684…	GO:0016020 membrane; GO:0044421 extracellular region part; GO:0031090 organelle membrane; GO:0005737 cytoplasm; GO:0031982 vesicle; GO:0031224 intrinsic component of membrane; GO:0044424 intracellular part; GO:0005623 cell; GO:0044422 organelle part; GO:0005740 mitochondrial envelope; GO:0070062 extracellular exosome; GO:0044425 membrane part; GO:0005622 intracellular; GO:0044464 cell part; GO:00…	GO:0005342 organic acid transmembrane transporter activity; GO:0015142 tricarboxylic acid transmembrane transporter activity; GO:0015137 citrate transmembrane transporter activity; GO:0015075 ion transmembrane transporter activity; GO:0022892 substrate-specific transporter activity; GO:0008514 organic anion transmembrane transporter activity; GO:0046943 carboxylic acid transmembrane transporter a…	IPR023395;	Mitochondrial carrier domain;	C	KOG0756	Mitochondrial tricarboxylate/dicarboxylate carrier proteins
Q8JZZ0	Specific	plasma membrane				GO:0014070 response to organic cyclic compound; GO:0051716 cellular response to stimulus; GO:0071413 cellular response to hydroxyisoflavone; GO:1901655 cellular response to ketone; GO:0071412 cellular response to genistein; GO:0080184 response to phenylpropanoid; GO:0033594 response to hydroxyisoflavone; GO:0071310 cellular response to organic substance; GO:1901700 response to oxygen-containing c…	GO:0016020 membrane; GO:0043231 intracellular membrane-bounded organelle; GO:0043226 organelle; GO:0043229 intracellular organelle; GO:0044425 membrane part; GO:0044464 cell part; GO:0005622 intracellular; GO:0031224 intrinsic component of membrane; GO:0044424 intracellular part; GO:0043227 membrane-bounded organelle; GO:0005623 cell; GO:0016021 integral component of membrane;	GO:0008194 UDP-glycosyltransferase activity; GO:0016757 transferase activity, transferring glycosyl groups; GO:0015020 glucuronosyltransferase activity; GO:0016758 transferase activity, transferring hexosyl groups; GO:0003824 catalytic activity; GO:0016740 transferase activity;			GC	KOG1192	UDP-glucuronosyl and UDP-glucosyl transferase
Q8K2B3	Specific	mitochondria	K00234	SDHA, SDH1; succinate dehydrogenase (ubiquinone) flavoprotein subunit [EC:1.3.5.1]	mmu00020 Citrate cycle (TCA cycle); mmu00190 Oxidative phosphorylation; mmu01100 Metabolic pathways; mmu01200 Carbon metabolism; mmu04714 Thermogenesis; mmu04932 Non-alcoholic fatty liver disease (NAFLD); mmu05010 Alzheimer disease; mmu05012 Parkinson disease; mmu05016 Huntington disease	GO:0009116 nucleoside metabolic process; GO:0042278 purine nucleoside metabolic process; GO:0009167 purine ribonucleoside monophosphate metabolic process; GO:0009117 nucleotide metabolic process; GO:0044699 single-organism process; GO:0009061 anaerobic respiration; GO:0044237 cellular metabolic process; GO:0006796 phosphate-containing compound metabolic process; GO:0008152 metabolic process; GO:0…	GO:0016020 membrane; GO:0098800 inner mitochondrial membrane protein complex; GO:0031090 organelle membrane; GO:0098796 membrane protein complex; GO:0005737 cytoplasm; GO:0032991 macromolecular complex; GO:0045281 succinate dehydrogenase complex; GO:0098798 mitochondrial protein complex; GO:0044424 intracellular part; GO:0005623 cell; GO:0044455 mitochondrial membrane part; GO:0044422 organelle p…	GO:1901265 nucleoside phosphate binding; GO:0050660 flavin adenine dinucleotide binding; GO:0043167 ion binding; GO:0000104 succinate dehydrogenase activity; GO:0000166 nucleotide binding; GO:0048037 cofactor binding; GO:0016491 oxidoreductase activity; GO:0009055 electron carrier activity; GO:1901363 heterocyclic compound binding; GO:0097159 organic cyclic compound binding; GO:0016627 oxidoreduc…	IPR027477; IPR003953; IPR015939; IPR023753;	Succinate dehydrogenase/fumarate reductase flavoprotein, catalytic domain; FAD-dependent oxidoreductase 2, FAD binding domain; Fumarate reductase/succinate dehydrogenase flavoprotein-like, C-terminal; FAD/NAD(P)-binding domain;	C	KOG2403	Succinate dehydrogenase, flavoprotein subunit
Q8QZR5	Specific	cytoplasm	K00814	GPT, ALT; alanine transaminase [EC:2.6.1.2]	mmu00220 Arginine biosynthesis; mmu00250 Alanine, aspartate and glutamate metabolism; mmu01100 Metabolic pathways; mmu01200 Carbon metabolism; mmu01210 2-Oxocarboxylic acid metabolism; mmu01230 Biosynthesis of amino acids	GO:0042853 L-alanine catabolic process; GO:1901606 alpha-amino acid catabolic process; GO:0042851 L-alanine metabolic process; GO:0009080 pyruvate family amino acid catabolic process; GO:0006522 alanine metabolic process; GO:0044699 single-organism process; GO:0009058 biosynthetic process; GO:0009078 pyruvate family amino acid metabolic process; GO:0044237 cellular metabolic process; GO:0071704 o…	GO:0070062 extracellular exosome; GO:0043226 organelle; GO:0005615 extracellular space; GO:0044421 extracellular region part; GO:0044464 cell part; GO:0005622 intracellular; GO:0005737 cytoplasm; GO:0031982 vesicle; GO:1903561 extracellular vesicle; GO:0044424 intracellular part; GO:0005623 cell; GO:0043227 membrane-bounded organelle; GO:0005576 extracellular region; GO:0043230 extracellular orga…	GO:0097159 organic cyclic compound binding; GO:1901363 heterocyclic compound binding; GO:0016769 transferase activity, transferring nitrogenous groups; GO:0004021 L-alanine:2-oxoglutarate aminotransferase activity; GO:0003824 catalytic activity; GO:0005488 binding; GO:0043167 ion binding; GO:0047635 alanine-oxo-acid transaminase activity; GO:0043168 anion binding; GO:0008483 transaminase activity…	IPR004839; IPR015424; IPR015421; IPR015422;	Aminotransferase, class I/classII; Pyridoxal phosphate-dependent transferase; Pyridoxal phosphate-dependent transferase, major region, subdomain 1; Pyridoxal phosphate-dependent transferase, major region, subdomain 2;	E	KOG0258	Alanine aminotransferase
Q8QZT1	Specific	mitochondria	K00626	E2.3.1.9, atoB; acetyl-CoA C-acetyltransferase [EC:2.3.1.9]	mmu00071 Fatty acid degradation; mmu00072 Synthesis and degradation of ketone bodies; mmu00280 Valine, leucine and isoleucine degradation; mmu00310 Lysine degradation; mmu00380 Tryptophan metabolism; mmu00620 Pyruvate metabolism; mmu00630 Glyoxylate and dicarboxylate metabolism; mmu00640 Propanoate metabolism; mmu00650 Butanoate metabolism; mmu00900 Terpenoid backbone biosynthesis; mmu01100 Metab…	GO:0044085 cellular component biogenesis; GO:0009116 nucleoside metabolic process; GO:0048732 gland development; GO:0072080 nephron tubule development; GO:0007420 brain development; GO:0044255 cellular lipid metabolic process; GO:0009163 nucleoside biosynthetic process; GO:0046129 purine ribonucleoside biosynthetic process; GO:0044237 cellular metabolic process; GO:0044272 sulfur compound biosynt…	GO:0016020 membrane; GO:0044421 extracellular region part; GO:0031090 organelle membrane; GO:0005737 cytoplasm; GO:0031982 vesicle; GO:0044424 intracellular part; GO:0005623 cell; GO:0044422 organelle part; GO:0031974 membrane-enclosed lumen; GO:0005740 mitochondrial envelope; GO:0070062 extracellular exosome; GO:0070013 intracellular organelle lumen; GO:0005622 intracellular; GO:0044464 cell par…	GO:0016885 ligase activity, forming carbon-carbon bonds; GO:0043167 ion binding; GO:0046983 protein dimerization activity; GO:0016874 ligase activity; GO:0016829 lyase activity; GO:0005515 protein binding; GO:0048037 cofactor binding; GO:0016747 transferase activity, transferring acyl groups other than amino-acyl groups; GO:0016407 acetyltransferase activity; GO:0016746 transferase activity, tran…	IPR016039; IPR020616; IPR020617;	Thiolase-like; Thiolase, N-terminal; Thiolase, C-terminal;	I	KOG1390	Acetyl-CoA acetyltransferase
Q8R081	Specific	nucleus	K13159	HNRNPL; heterogeneous nuclear ribonucleoprotein L		GO:1905216 positive regulation of RNA binding; GO:0032270 positive regulation of cellular protein metabolic process; GO:0000381 regulation of alternative mRNA splicing, via spliceosome; GO:0010608 posttranscriptional regulation of gene expression; GO:0009891 positive regulation of biosynthetic process; GO:0050686 negative regulation of mRNA processing; GO:0051253 negative regulation of RNA metabo…	GO:0016020 membrane; GO:0044421 extracellular region part; GO:0031982 vesicle; GO:0005737 cytoplasm; GO:0032991 macromolecular complex; GO:0044424 intracellular part; GO:0005623 cell; GO:0044422 organelle part; GO:0043228 non-membrane-bounded organelle; GO:0031974 membrane-enclosed lumen; GO:0070062 extracellular exosome; GO:0005654 nucleoplasm; GO:0070013 intracellular organelle lumen; GO:000562…	GO:0003677 DNA binding; GO:0003723 RNA binding; GO:1901265 nucleoside phosphate binding; GO:0097157 pre-mRNA intronic binding; GO:0003730 mRNA 3'-UTR binding; GO:0005515 protein binding; GO:0000166 nucleotide binding; GO:1901363 heterocyclic compound binding; GO:0097159 organic cyclic compound binding; GO:0000975 regulatory region DNA binding; GO:0003729 mRNA binding; GO:0001067 regulatory region…	IPR000504; IPR012677;	RNA recognition motif domain; Nucleotide-binding alpha-beta plait domain;	A	KOG1456	Heterogeneous nuclear ribonucleoprotein L (contains RRM repeats)
Q8R164	Specific	mitochondria	K18399	BPHL; valacyclovir hydrolase [EC:3.1.-.-]			GO:0043229 intracellular organelle; GO:0044421 extracellular region part; GO:0005737 cytoplasm; GO:0031982 vesicle; GO:0044424 intracellular part; GO:0005623 cell; GO:0005576 extracellular region; GO:0005739 mitochondrion; GO:0043226 organelle; GO:0070062 extracellular exosome; GO:0043231 intracellular membrane-bounded organelle; GO:0005622 intracellular; GO:0044464 cell part; GO:1903561 extracel…	GO:0016787 hydrolase activity; GO:0003824 catalytic activity;	IPR029058; IPR000073;	Alpha/Beta hydrolase fold; Alpha/beta hydrolase fold-1;	R	KOG2984	Predicted hydrolase
Q8R1I1	Specific	mitochondria	K00419	QCR9, UCRC; ubiquinol-cytochrome c reductase subunit 9	mmu00190 Oxidative phosphorylation; mmu01100 Metabolic pathways; mmu04260 Cardiac muscle contraction; mmu04714 Thermogenesis; mmu04932 Non-alcoholic fatty liver disease (NAFLD); mmu05010 Alzheimer disease; mmu05012 Parkinson disease; mmu05016 Huntington disease	GO:0044085 cellular component biogenesis; GO:0009116 nucleoside metabolic process; GO:0042278 purine nucleoside metabolic process; GO:0009167 purine ribonucleoside monophosphate metabolic process; GO:0009117 nucleotide metabolic process; GO:0044699 single-organism process; GO:0034551 mitochondrial respiratory chain complex III assembly; GO:0044237 cellular metabolic process; GO:0006796 phosphate-…	GO:0016020 membrane; GO:0044421 extracellular region part; GO:0098800 inner mitochondrial membrane protein complex; GO:0031090 organelle membrane; GO:0098796 membrane protein complex; GO:0005737 cytoplasm; GO:0031982 vesicle; GO:0032991 macromolecular complex; GO:0031224 intrinsic component of membrane; GO:0044424 intracellular part; GO:0098798 mitochondrial protein complex; GO:0005623 cell; GO:0…				C	KOG3494	Ubiquinol cytochrome c oxidoreductase, subunit QCR9
Q8VBT2	Specific	plasma membrane	K17989	SDS, SDH, CHA1; L-serine/L-threonine ammonia-lyase [EC:4.3.1.17 4.3.1.19]	mmu00260 Glycine, serine and threonine metabolism; mmu00270 Cysteine and methionine metabolism; mmu00290 Valine, leucine and isoleucine biosynthesis; mmu01100 Metabolic pathways; mmu01200 Carbon metabolism; mmu01230 Biosynthesis of amino acids	GO:1901606 alpha-amino acid catabolic process; GO:0016051 carbohydrate biosynthetic process; GO:0016053 organic acid biosynthetic process; GO:0019319 hexose biosynthetic process; GO:0044699 single-organism process; GO:0046364 monosaccharide biosynthetic process; GO:0009058 biosynthetic process; GO:0044237 cellular metabolic process; GO:0071704 organic substance metabolic process; GO:0006006 gluco…	GO:0043226 organelle; GO:0043231 intracellular membrane-bounded organelle; GO:0043229 intracellular organelle; GO:0044464 cell part; GO:0005622 intracellular; GO:0005737 cytoplasm; GO:0044424 intracellular part; GO:0043227 membrane-bounded organelle; GO:0005623 cell; GO:0005829 cytosol; GO:0005739 mitochondrion; GO:0044444 cytoplasmic part;	GO:0004794 L-threonine ammonia-lyase activity; GO:0043167 ion binding; GO:0046983 protein dimerization activity; GO:0003941 L-serine ammonia-lyase activity; GO:0016829 lyase activity; GO:0005515 protein binding; GO:0048037 cofactor binding; GO:0030170 pyridoxal phosphate binding; GO:1901363 heterocyclic compound binding; GO:0097159 organic cyclic compound binding; GO:0016840 carbon-nitrogen lyase…	IPR001926;	Tryptophan synthase beta subunit-like PLP-dependent enzyme;	E	KOG1250	Threonine/serine dehydratases
Q8VC12	Specific	nucleus	K01712	hutU, UROC1; urocanate hydratase [EC:4.2.1.49]	mmu00340 Histidine metabolism; mmu01100 Metabolic pathways	GO:0043648 dicarboxylic acid metabolic process; GO:1901606 alpha-amino acid catabolic process; GO:0006725 cellular aromatic compound metabolic process; GO:0052803 imidazole-containing compound metabolic process; GO:0044699 single-organism process; GO:0044237 cellular metabolic process; GO:0019556 histidine catabolic process to glutamate and formamide; GO:0071704 organic substance metabolic proces…	GO:0044464 cell part; GO:0005622 intracellular; GO:0005737 cytoplasm; GO:0044424 intracellular part; GO:0005829 cytosol; GO:0005623 cell; GO:0044444 cytoplasmic part;	GO:0016153 urocanate hydratase activity; GO:0016829 lyase activity; GO:0016836 hydro-lyase activity; GO:0003824 catalytic activity; GO:0016835 carbon-oxygen lyase activity;
Q8VCH0	Specific	mitochondria	K07513	ACAA1; acetyl-CoA acyltransferase 1 [EC:2.3.1.16]	mmu00071 Fatty acid degradation; mmu00280 Valine, leucine and isoleucine degradation; mmu00592 alpha-Linolenic acid metabolism; mmu01040 Biosynthesis of unsaturated fatty acids; mmu01100 Metabolic pathways; mmu01212 Fatty acid metabolism; mmu03320 PPAR signaling pathway; mmu04146 Peroxisome	GO:0044281 small molecule metabolic process; GO:0044763 single-organism cellular process; GO:0044699 single-organism process; GO:0044255 cellular lipid metabolic process; GO:0006631 fatty acid metabolic process; GO:0044238 primary metabolic process; GO:0044237 cellular metabolic process; GO:0071704 organic substance metabolic process; GO:0008152 metabolic process; GO:0044710 single-organism metab…	GO:0043226 organelle; GO:0043231 intracellular membrane-bounded organelle; GO:0043229 intracellular organelle; GO:0044464 cell part; GO:0005622 intracellular; GO:0005777 peroxisome; GO:0042579 microbody; GO:0005737 cytoplasm; GO:0044424 intracellular part; GO:0005623 cell; GO:0043227 membrane-bounded organelle; GO:0005739 mitochondrion; GO:0044444 cytoplasmic part;	GO:0003988 acetyl-CoA C-acyltransferase activity; GO:0016746 transferase activity, transferring acyl groups; GO:0016408 C-acyltransferase activity; GO:0016747 transferase activity, transferring acyl groups other than amino-acyl groups; GO:0003824 catalytic activity; GO:0016740 transferase activity;	IPR016039; IPR020616; IPR020617;	Thiolase-like; Thiolase, N-terminal; Thiolase, C-terminal;	I	KOG1389	3-oxoacyl CoA thiolase
Q8VCW8	Specific	mitochondria	K23617			GO:0044281 small molecule metabolic process; GO:0044763 single-organism cellular process; GO:0044699 single-organism process; GO:0044255 cellular lipid metabolic process; GO:0006631 fatty acid metabolic process; GO:0044238 primary metabolic process; GO:0044237 cellular metabolic process; GO:0071704 organic substance metabolic process; GO:0008152 metabolic process; GO:0044710 single-organism metab…	GO:0043226 organelle; GO:0043231 intracellular membrane-bounded organelle; GO:0043229 intracellular organelle; GO:0044464 cell part; GO:0005622 intracellular; GO:0005737 cytoplasm; GO:0044424 intracellular part; GO:0043227 membrane-bounded organelle; GO:0005623 cell; GO:0005739 mitochondrion; GO:0044444 cytoplasmic part;	GO:0005524 ATP binding; GO:1901265 nucleoside phosphate binding; GO:0016874 ligase activity; GO:0001882 nucleoside binding; GO:0043167 ion binding; GO:0000166 nucleotide binding; GO:0097159 organic cyclic compound binding; GO:1901363 heterocyclic compound binding; GO:0032549 ribonucleoside binding; GO:0097367 carbohydrate derivative binding; GO:0003824 catalytic activity; GO:0032553 ribonucleotid…	IPR025110; IPR000873;	AMP-binding enzyme C-terminal domain; AMP-dependent synthetase/ligase;	I	KOG1177	Long chain fatty acid acyl-CoA ligase
Q8VDJ3	Specific	cytoplasm				GO:0008203 cholesterol metabolic process; GO:0006869 lipid transport; GO:1901615 organic hydroxy compound metabolic process; GO:1902652 secondary alcohol metabolic process; GO:0006066 alcohol metabolic process; GO:0044281 small molecule metabolic process; GO:0098609 cell-cell adhesion; GO:0008202 steroid metabolic process; GO:0044699 single-organism process; GO:1901360 organic cyclic compound met…	GO:0043229 intracellular organelle; GO:0044421 extracellular region part; GO:0005615 extracellular space; GO:0030054 cell junction; GO:0034358 plasma lipoprotein particle; GO:0005737 cytoplasm; GO:0070161 anchoring junction; GO:0032991 macromolecular complex; GO:0044424 intracellular part; GO:0005913 cell-cell adherens junction; GO:0034364 high-density lipoprotein particle; GO:0005829 cytosol; GO…	GO:0097159 organic cyclic compound binding; GO:1901363 heterocyclic compound binding; GO:0003723 RNA binding; GO:0098641 cadherin binding involved in cell-cell adhesion; GO:0050839 cell adhesion molecule binding; GO:0098631 protein binding involved in cell adhesion; GO:0005488 binding; GO:0003676 nucleic acid binding; GO:0045296 cadherin binding; GO:0005515 protein binding; GO:0098632 protein bin…	IPR004087; IPR004088;	K Homology domain; K Homology domain, type 1;	I	KOG2208	Vigilin
Q8VDM4	Specific	plasma membrane	K03028	PSMD2, RPN1; 26S proteasome regulatory subunit N1	mmu03050 Proteasome; mmu05169 Epstein-Barr virus infection	GO:0050789 regulation of biological process; GO:0080090 regulation of primary metabolic process; GO:0060255 regulation of macromolecule metabolic process; GO:0051246 regulation of protein metabolic process; GO:0050790 regulation of catalytic activity; GO:0009894 regulation of catabolic process; GO:0019222 regulation of metabolic process; GO:0065009 regulation of molecular function; GO:0042176 reg…	GO:0016020 membrane; GO:0044421 extracellular region part; GO:0000502 proteasome complex; GO:0005838 proteasome regulatory particle; GO:0031982 vesicle; GO:0032991 macromolecular complex; GO:0044424 intracellular part; GO:0005623 cell; GO:0005576 extracellular region; GO:1905369 endopeptidase complex; GO:0043226 organelle; GO:0070062 extracellular exosome; GO:1902494 catalytic complex; GO:0022624…	GO:0005515 protein binding; GO:0030234 enzyme regulator activity; GO:0098772 molecular function regulator; GO:0005488 binding;	IPR016024;	Armadillo-type fold;	O	KOG2005	26S proteasome regulatory complex, subunit RPN1/PSMD2
Q8VE09	Specific	nucleus						GO:0005515 protein binding; GO:0005488 binding;	IPR011990;	Tetratricopeptide-like helical domain;	S	KOG3783	Uncharacterized conserved protein
Q8VEK3	Specific	nucleus	K12888	HNRNPU; heterogeneous nuclear ribonucleoprotein U	mmu03040 Spliceosome	GO:0001649 osteoblast differentiation; GO:0065008 regulation of biological quality; GO:0010608 posttranscriptional regulation of gene expression; GO:0043489 RNA stabilization; GO:0071384 cellular response to corticosteroid stimulus; GO:0044237 cellular metabolic process; GO:0032204 regulation of telomere maintenance; GO:0008152 metabolic process; GO:0007507 heart development; GO:0071549 cellular …	GO:0016020 membrane; GO:0044421 extracellular region part; GO:0005737 cytoplasm; GO:0032991 macromolecular complex; GO:0044424 intracellular part; GO:0005623 cell; GO:0044422 organelle part; GO:0036464 cytoplasmic ribonucleoprotein granule; GO:0043228 non-membrane-bounded organelle; GO:0031974 membrane-enclosed lumen; GO:1902494 catalytic complex; GO:0005654 nucleoplasm; GO:0070013 intracellular …	GO:1901265 nucleoside phosphate binding; GO:0005515 protein binding; GO:0035326 enhancer binding; GO:0001047 core promoter binding; GO:1901363 heterocyclic compound binding; GO:0000975 regulatory region DNA binding; GO:0097159 organic cyclic compound binding; GO:0032553 ribonucleotide binding; GO:0005488 binding; GO:0032550 purine ribonucleoside binding; GO:0043168 anion binding; GO:0032559 adeny…	IPR003034; IPR001870; IPR027417; IPR013320; IPR003877;	SAP domain; B30.2/SPRY domain; P-loop containing nucleoside triphosphate hydrolase; Concanavalin A-like lectin/glucanase domain; SPRY domain;	A	KOG2242	Scaffold/matrix specific factor hnRNP-U/SAF-A, contains SPRY domain
Q8VEM8	Specific	nucleus	K15102	SLC25A3, PHC, PIC; solute carrier family 25 (mitochondrial phosphate transporter), member 3		GO:0006820 anion transport; GO:0098661 inorganic anion transmembrane transport; GO:0006810 transport; GO:0055085 transmembrane transport; GO:0034220 ion transmembrane transport; GO:0098660 inorganic ion transmembrane transport; GO:0006811 ion transport; GO:0006839 mitochondrial transport; GO:0006817 phosphate ion transport; GO:0051179 localization; GO:0035435 phosphate ion transmembrane transport…	GO:0016020 membrane; GO:0044421 extracellular region part; GO:0031090 organelle membrane; GO:0005737 cytoplasm; GO:0031982 vesicle; GO:0031224 intrinsic component of membrane; GO:0044424 intracellular part; GO:0005623 cell; GO:0044422 organelle part; GO:0005740 mitochondrial envelope; GO:0070062 extracellular exosome; GO:0044425 membrane part; GO:0005622 intracellular; GO:0044464 cell part; GO:00…	GO:0022804 active transmembrane transporter activity; GO:0015291 secondary active transmembrane transporter activity; GO:0015075 ion transmembrane transporter activity; GO:0015293 symporter activity; GO:0044877 macromolecular complex binding; GO:0022892 substrate-specific transporter activity; GO:0005515 protein binding; GO:0015103 inorganic anion transmembrane transporter activity; GO:0022891 su…	IPR023395;	Mitochondrial carrier domain;	C	KOG0767	Mitochondrial phosphate carrier protein
Q91VD9	Specific	mitochondria	K03934	NDUFS1; NADH dehydrogenase (ubiquinone) Fe-S protein 1 [EC:1.6.5.3 1.6.99.3]	mmu00190 Oxidative phosphorylation; mmu01100 Metabolic pathways; mmu04714 Thermogenesis; mmu04723 Retrograde endocannabinoid signaling; mmu04932 Non-alcoholic fatty liver disease (NAFLD); mmu05010 Alzheimer disease; mmu05012 Parkinson disease; mmu05016 Huntington disease	GO:0065008 regulation of biological quality; GO:0009116 nucleoside metabolic process; GO:0042278 purine nucleoside metabolic process; GO:0009167 purine ribonucleoside monophosphate metabolic process; GO:0009117 nucleotide metabolic process; GO:0044699 single-organism process; GO:0044237 cellular metabolic process; GO:0006796 phosphate-containing compound metabolic process; GO:0008152 metabolic pr…	GO:0016020 membrane; GO:0098800 inner mitochondrial membrane protein complex; GO:0031090 organelle membrane; GO:0098796 membrane protein complex; GO:0005737 cytoplasm; GO:0032991 macromolecular complex; GO:0045271 respiratory chain complex I; GO:0044424 intracellular part; GO:0098798 mitochondrial protein complex; GO:0005747 mitochondrial respiratory chain complex I; GO:0005623 cell; GO:0044455 m…	GO:0016651 oxidoreductase activity, acting on NAD(P)H; GO:0051537 2 iron, 2 sulfur cluster binding; GO:0043167 ion binding; GO:0050136 NADH dehydrogenase (quinone) activity; GO:0051539 4 iron, 4 sulfur cluster binding; GO:0016655 oxidoreductase activity, acting on NAD(P)H, quinone or similar compound as acceptor; GO:0008137 NADH dehydrogenase (ubiquinone) activity; GO:0016491 oxidoreductase activ…	IPR019574; IPR006656; IPR001041; IPR012675; IPR015405; IPR006963;	NADH:ubiquinone oxidoreductase, subunit G, iron-sulphur binding; Molybdopterin oxidoreductase; 2Fe-2S ferredoxin-type iron-sulfur binding domain; Beta-grasp domain; NADH-quinone oxidoreductase, chain G, C-terminal; Molybdopterin oxidoreductase, 4Fe-4S domain;	C	KOG2282	NADH-ubiquinone oxidoreductase, NDUFS1/75 kDa subunit
Q91VI7	Specific	nucleus	K16634	RNH1; ribonuclease inhibitor		GO:0050789 regulation of biological process; GO:0050790 regulation of catalytic activity; GO:0022603 regulation of anatomical structure morphogenesis; GO:1901342 regulation of vasculature development; GO:0065009 regulation of molecular function; GO:0044092 negative regulation of molecular function; GO:0045765 regulation of angiogenesis; GO:0043086 negative regulation of catalytic activity; GO:005…	GO:0043229 intracellular organelle; GO:0044421 extracellular region part; GO:0032311 angiogenin-PRI complex; GO:0005737 cytoplasm; GO:0044446 intracellular organelle part; GO:0031982 vesicle; GO:0032991 macromolecular complex; GO:0031981 nuclear lumen; GO:0044424 intracellular part; GO:0005829 cytosol; GO:0005623 cell; GO:0005576 extracellular region; GO:0044422 organelle part; GO:0031974 membran…	GO:0005515 protein binding; GO:0098772 molecular function regulator; GO:0030234 enzyme regulator activity; GO:0004857 enzyme inhibitor activity; GO:0005488 binding; GO:0008428 ribonuclease inhibitor activity;	IPR032675;	Leucine-rich repeat domain, L domain-like;	S	KOG4308	LRR-containing protein
Q91W64	Specific	endoplasmic reticulum	K07413	CYP2C; cytochrome P450 family 2 subfamily C [EC:1.14.14.1]	mmu00140 Steroid hormone biosynthesis; mmu00590 Arachidonic acid metabolism; mmu00591 Linoleic acid metabolism; mmu00830 Retinol metabolism; mmu01100 Metabolic pathways; mmu04726 Serotonergic synapse; mmu04750 Inflammatory mediator regulation of TRP channels; mmu05204 Chemical carcinogenesis	GO:0033559 unsaturated fatty acid metabolic process; GO:0019369 arachidonic acid metabolic process; GO:0055114 oxidation-reduction process; GO:0044281 small molecule metabolic process; GO:0044763 single-organism cellular process; GO:1901568 fatty acid derivative metabolic process; GO:0044699 single-organism process; GO:0044255 cellular lipid metabolic process; GO:0006631 fatty acid metabolic proc…	GO:0016020 membrane; GO:0043229 intracellular organelle; GO:0042175 nuclear outer membrane-endoplasmic reticulum membrane network; GO:0005783 endoplasmic reticulum; GO:0031090 organelle membrane; GO:0044446 intracellular organelle part; GO:0005737 cytoplasm; GO:0012505 endomembrane system; GO:0044424 intracellular part; GO:0005623 cell; GO:0044422 organelle part; GO:0043226 organelle; GO:0043231 …	GO:0008391 arachidonic acid monooxygenase activity; GO:0005506 iron ion binding; GO:0008392 arachidonic acid epoxygenase activity; GO:0043167 ion binding; GO:0016705 oxidoreductase activity, acting on paired donors, with incorporation or reduction of molecular oxygen; GO:0016491 oxidoreductase activity; GO:1901363 heterocyclic compound binding; GO:0097159 organic cyclic compound binding; GO:00200…			Q	KOG0156	Cytochrome P450 CYP2 subfamily
Q91WD5	Specific	mitochondria	K03935	NDUFS2; NADH dehydrogenase (ubiquinone) Fe-S protein 2 [EC:1.6.5.3 1.6.99.3]	mmu00190 Oxidative phosphorylation; mmu01100 Metabolic pathways; mmu04714 Thermogenesis; mmu04723 Retrograde endocannabinoid signaling; mmu04932 Non-alcoholic fatty liver disease (NAFLD); mmu05010 Alzheimer disease; mmu05012 Parkinson disease; mmu05016 Huntington disease	GO:0008152 metabolic process; GO:0006950 response to stress; GO:0055114 oxidation-reduction process; GO:0044710 single-organism metabolic process; GO:0006979 response to oxidative stress; GO:0044699 single-organism process; GO:0050896 response to stimulus;	GO:0016020 membrane; GO:0098800 inner mitochondrial membrane protein complex; GO:0031090 organelle membrane; GO:0098796 membrane protein complex; GO:0005737 cytoplasm; GO:0032991 macromolecular complex; GO:0045271 respiratory chain complex I; GO:0044424 intracellular part; GO:0098798 mitochondrial protein complex; GO:0005747 mitochondrial respiratory chain complex I; GO:0005623 cell; GO:0044455 m…	GO:0016651 oxidoreductase activity, acting on NAD(P)H; GO:1901265 nucleoside phosphate binding; GO:0031625 ubiquitin protein ligase binding; GO:0043167 ion binding; GO:0050136 NADH dehydrogenase (quinone) activity; GO:0005515 protein binding; GO:0000166 nucleotide binding; GO:0051539 4 iron, 4 sulfur cluster binding; GO:0048037 cofactor binding; GO:0016655 oxidoreductase activity, acting on NAD(P…	IPR029014; IPR001135;	NiFe hydrogenase-like; NADH-quinone oxidoreductase, subunit D;	C	KOG2870	NADH:ubiquinone oxidoreductase, NDUFS2/49 kDa subunit
Q91WJ8	Specific	cytoplasm	K13210	FUBP; far upstream element-binding protein		GO:0097659 nucleic acid-templated transcription; GO:0009891 positive regulation of biosynthetic process; GO:0044699 single-organism process; GO:0009058 biosynthetic process; GO:0044237 cellular metabolic process; GO:2001141 regulation of RNA biosynthetic process; GO:0008152 metabolic process; GO:0009893 positive regulation of metabolic process; GO:0051173 positive regulation of nitrogen compound …	GO:0043226 organelle; GO:0043231 intracellular membrane-bounded organelle; GO:0043229 intracellular organelle; GO:0005634 nucleus; GO:0044464 cell part; GO:0005622 intracellular; GO:0044424 intracellular part; GO:0043227 membrane-bounded organelle; GO:0005623 cell;	GO:0097159 organic cyclic compound binding; GO:1901363 heterocyclic compound binding; GO:0000981 RNA polymerase II transcription factor activity, sequence-specific DNA binding; GO:0001228 transcriptional activator activity, RNA polymerase II transcription regulatory region sequence-specific binding; GO:0003677 DNA binding; GO:0003723 RNA binding; GO:0001205 transcriptional activator activity, RNA…	IPR004087; IPR004088; IPR015096;	K Homology domain; K Homology domain, type 1; Domain of unknown function DUF1897;	A	KOG1676	K-homology type RNA binding proteins
Q91WL5	Specific	endoplasmic reticulum	K07425	CYP4A; alkane 1-monooxygenase [EC:1.14.15.3]	mmu00071 Fatty acid degradation; mmu00590 Arachidonic acid metabolism; mmu00830 Retinol metabolism; mmu01100 Metabolic pathways; mmu03320 PPAR signaling pathway; mmu04270 Vascular smooth muscle contraction; mmu04750 Inflammatory mediator regulation of TRP channels	GO:0055114 oxidation-reduction process; GO:0044281 small molecule metabolic process; GO:0044763 single-organism cellular process; GO:0044699 single-organism process; GO:0044255 cellular lipid metabolic process; GO:0006631 fatty acid metabolic process; GO:0044238 primary metabolic process; GO:0044237 cellular metabolic process; GO:0071704 organic substance metabolic process; GO:0008152 metabolic p…	GO:0016020 membrane; GO:0043229 intracellular organelle; GO:0042175 nuclear outer membrane-endoplasmic reticulum membrane network; GO:0005783 endoplasmic reticulum; GO:0031090 organelle membrane; GO:0044446 intracellular organelle part; GO:0005737 cytoplasm; GO:0012505 endomembrane system; GO:0044424 intracellular part; GO:0005623 cell; GO:0044422 organelle part; GO:0043226 organelle; GO:0043231 …	GO:0005506 iron ion binding; GO:0018685 alkane 1-monooxygenase activity; GO:0043167 ion binding; GO:0016705 oxidoreductase activity, acting on paired donors, with incorporation or reduction of molecular oxygen; GO:0016491 oxidoreductase activity; GO:1901363 heterocyclic compound binding; GO:0097159 organic cyclic compound binding; GO:0020037 heme binding; GO:0016713 oxidoreductase activity, actin…			QI	KOG0157	Cytochrome P450 CYP4/CYP19/CYP26 subfamilies
Q91WN4	Specific	endoplasmic reticulum	K00486	KMO; kynurenine 3-monooxygenase [EC:1.14.13.9]	mmu00380 Tryptophan metabolism; mmu01100 Metabolic pathways	GO:0051188 cofactor biosynthetic process; GO:1901606 alpha-amino acid catabolic process; GO:0019362 pyridine nucleotide metabolic process; GO:0016053 organic acid biosynthetic process; GO:0009117 nucleotide metabolic process; GO:0044699 single-organism process; GO:0009058 biosynthetic process; GO:0019363 pyridine nucleotide biosynthetic process; GO:0044237 cellular metabolic process; GO:0072524 p…	GO:0016020 membrane; GO:0044421 extracellular region part; GO:0019867 outer membrane; GO:0031090 organelle membrane; GO:0031982 vesicle; GO:0005737 cytoplasm; GO:0031224 intrinsic component of membrane; GO:0044424 intracellular part; GO:0005623 cell; GO:0044422 organelle part; GO:0070062 extracellular exosome; GO:0005740 mitochondrial envelope; GO:0044425 membrane part; GO:0005622 intracellular; …	GO:0016709 oxidoreductase activity, acting on paired donors, with incorporation or reduction of molecular oxygen, NAD(P)H as one donor, and incorporation of one atom of oxygen; GO:0016174 NAD(P)H oxidase activity; GO:0016651 oxidoreductase activity, acting on NAD(P)H; GO:1901265 nucleoside phosphate binding; GO:0050660 flavin adenine dinucleotide binding; GO:0004502 kynurenine 3-monooxygenase act…	IPR002938; IPR023753;	FAD-binding domain; FAD/NAD(P)-binding domain;	CR	KOG2614	Kynurenine 3-monooxygenase and related flavoprotein monooxygenases
Q91WS4	Specific	cytoplasm	K00547	mmuM, BHMT2; homocysteine S-methyltransferase [EC:2.1.1.10]	mmu00270 Cysteine and methionine metabolism; mmu01100 Metabolic pathways	GO:0000097 sulfur amino acid biosynthetic process; GO:0016053 organic acid biosynthetic process; GO:0009066 aspartate family amino acid metabolic process; GO:0044699 single-organism process; GO:0009058 biosynthetic process; GO:1901566 organonitrogen compound biosynthetic process; GO:0044237 cellular metabolic process; GO:0032259 methylation; GO:0000096 sulfur amino acid metabolic process; GO:0044…	GO:0070062 extracellular exosome; GO:0043226 organelle; GO:0044421 extracellular region part; GO:0044464 cell part; GO:0005622 intracellular; GO:0005737 cytoplasm; GO:0031982 vesicle; GO:1903561 extracellular vesicle; GO:0044424 intracellular part; GO:0005623 cell; GO:0043227 membrane-bounded organelle; GO:0005576 extracellular region; GO:0043230 extracellular organelle;	GO:0008757 S-adenosylmethionine-dependent methyltransferase activity; GO:0008898 S-adenosylmethionine-homocysteine S-methyltransferase activity; GO:0008168 methyltransferase activity; GO:0046914 transition metal ion binding; GO:0003824 catalytic activity; GO:0005488 binding; GO:0043167 ion binding; GO:0008172 S-methyltransferase activity; GO:0046872 metal ion binding; GO:0043169 cation binding; G…	IPR003726;	Homocysteine-binding domain;	E	KOG1579	Homocysteine S-methyltransferase
Q91X44	Specific	cytoplasm				GO:0045913 positive regulation of carbohydrate metabolic process; GO:0065008 regulation of biological quality; GO:0009746 response to hexose; GO:0072594 establishment of protein localization to organelle; GO:0017038 protein import; GO:0042593 glucose homeostasis; GO:0044699 single-organism process; GO:0070328 triglyceride homeostasis; GO:0051169 nuclear transport; GO:0044237 cellular metabolic pr…	GO:0043229 intracellular organelle; GO:0044446 intracellular organelle part; GO:0005737 cytoplasm; GO:0031981 nuclear lumen; GO:0044424 intracellular part; GO:0005623 cell; GO:0005829 cytosol; GO:0044422 organelle part; GO:0005739 mitochondrion; GO:0031974 membrane-enclosed lumen; GO:0043231 intracellular membrane-bounded organelle; GO:0043226 organelle; GO:0005654 nucleoplasm; GO:0005634 nucleus…	GO:0097367 carbohydrate derivative binding; GO:0030234 enzyme regulator activity; GO:0005488 binding; GO:0043167 ion binding; GO:0030246 carbohydrate binding; GO:0043168 anion binding; GO:0019904 protein domain specific binding; GO:0005515 protein binding; GO:0098772 molecular function regulator; GO:0004857 enzyme inhibitor activity; GO:0019899 enzyme binding; GO:0070095 fructose-6-phosphate bind…	IPR001347;	Sugar isomerase (SIS);
Q91X77	Specific	endoplasmic reticulum	K07413	CYP2C; cytochrome P450 family 2 subfamily C [EC:1.14.14.1]	mmu00140 Steroid hormone biosynthesis; mmu00590 Arachidonic acid metabolism; mmu00591 Linoleic acid metabolism; mmu00830 Retinol metabolism; mmu01100 Metabolic pathways; mmu04726 Serotonergic synapse; mmu04750 Inflammatory mediator regulation of TRP channels; mmu05204 Chemical carcinogenesis	GO:0033559 unsaturated fatty acid metabolic process; GO:0019369 arachidonic acid metabolic process; GO:0055114 oxidation-reduction process; GO:0043651 linoleic acid metabolic process; GO:0044281 small molecule metabolic process; GO:0044763 single-organism cellular process; GO:1901568 fatty acid derivative metabolic process; GO:0044699 single-organism process; GO:0044255 cellular lipid metabolic p…	GO:0043229 intracellular organelle; GO:0016020 membrane; GO:0042175 nuclear outer membrane-endoplasmic reticulum membrane network; GO:0005783 endoplasmic reticulum; GO:0031090 organelle membrane; GO:0044446 intracellular organelle part; GO:0005737 cytoplasm; GO:0012505 endomembrane system; GO:0044424 intracellular part; GO:0005623 cell; GO:0044422 organelle part; GO:0043231 intracellular membrane…	GO:0008391 arachidonic acid monooxygenase activity; GO:0005506 iron ion binding; GO:0008392 arachidonic acid epoxygenase activity; GO:0043167 ion binding; GO:0016705 oxidoreductase activity, acting on paired donors, with incorporation or reduction of molecular oxygen; GO:0071614 linoleic acid epoxygenase activity; GO:0016491 oxidoreductase activity; GO:1901363 heterocyclic compound binding; GO:00…			Q	KOG0156	Cytochrome P450 CYP2 subfamily
Q91XE0	Specific	cytoplasm	K00628	GLYAT; glycine N-acyltransferase / glycine N-benzoyltransferase [EC:2.3.1.13 2.3.1.71]	mmu00360 Phenylalanine metabolism; mmu01100 Metabolic pathways	GO:0044281 small molecule metabolic process; GO:0009636 response to toxic substance; GO:0044763 single-organism cellular process; GO:0006807 nitrogen compound metabolic process; GO:0044699 single-organism process; GO:1901605 alpha-amino acid metabolic process; GO:0006544 glycine metabolic process; GO:0044238 primary metabolic process; GO:0050896 response to stimulus; GO:0044237 cellular metabolic…	GO:0043229 intracellular organelle; GO:0044421 extracellular region part; GO:0005737 cytoplasm; GO:0031982 vesicle; GO:0044424 intracellular part; GO:0005623 cell; GO:0005576 extracellular region; GO:0005739 mitochondrion; GO:0043226 organelle; GO:0070062 extracellular exosome; GO:0043231 intracellular membrane-bounded organelle; GO:0005622 intracellular; GO:0044464 cell part; GO:1903561 extracel…	GO:0016746 transferase activity, transferring acyl groups; GO:0003824 catalytic activity; GO:0047962 glycine N-benzoyltransferase activity; GO:0016740 transferase activity; GO:0016747 transferase activity, transferring acyl groups other than amino-acyl groups; GO:0016410 N-acyltransferase activity; GO:0047961 glycine N-acyltransferase activity;	IPR015938; IPR016181; IPR013652;	Glycine N-acyltransferase, N-terminal; Acyl-CoA N-acyltransferase; Glycine N-acyltransferase, C-terminal;
Q91XE8	Specific	plasma membrane					GO:0016020 membrane; GO:0070062 extracellular exosome; GO:0043226 organelle; GO:0044421 extracellular region part; GO:0044425 membrane part; GO:0031982 vesicle; GO:1903561 extracellular vesicle; GO:0031224 intrinsic component of membrane; GO:0043227 membrane-bounded organelle; GO:0016021 integral component of membrane; GO:0005576 extracellular region; GO:0043230 extracellular organelle;		IPR025423;	Domain of unknown function DUF4149;	S	KOG2886	Uncharacterized conserved protein
Q91Y97	Specific	cytoplasm	K01623	ALDO; fructose-bisphosphate aldolase, class I [EC:4.1.2.13]	mmu00010 Glycolysis / Gluconeogenesis; mmu00030 Pentose phosphate pathway; mmu00051 Fructose and mannose metabolism; mmu01100 Metabolic pathways; mmu01200 Carbon metabolism; mmu01230 Biosynthesis of amino acids; mmu04066 HIF-1 signaling pathway	GO:0046365 monosaccharide catabolic process; GO:0044085 cellular component biogenesis; GO:0006757 ATP generation from ADP; GO:0009116 nucleoside metabolic process; GO:0042278 purine nucleoside metabolic process; GO:0006165 nucleoside diphosphate phosphorylation; GO:0046031 ADP metabolic process; GO:0019362 pyridine nucleotide metabolic process; GO:0006096 glycolytic process; GO:0009167 purine rib…	GO:0043229 intracellular organelle; GO:0044421 extracellular region part; GO:0044450 microtubule organizing center part; GO:0043232 intracellular non-membrane-bounded organelle; GO:0044430 cytoskeletal part; GO:0031982 vesicle; GO:0034451 centriolar satellite; GO:0044446 intracellular organelle part; GO:0005737 cytoplasm; GO:0044424 intracellular part; GO:0005623 cell; GO:0005576 extracellular re…	GO:0061609 fructose-1-phosphate aldolase activity; GO:0042802 identical protein binding; GO:0008092 cytoskeletal protein binding; GO:0004332 fructose-bisphosphate aldolase activity; GO:0003824 catalytic activity; GO:0051117 ATPase binding; GO:0016830 carbon-carbon lyase activity; GO:0005488 binding; GO:0070061 fructose binding; GO:0030246 carbohydrate binding; GO:0016829 lyase activity; GO:000551…	IPR013785;	Aldolase-type TIM barrel;	G	KOG1557	Fructose-biphosphate aldolase
Q91YQ5	Specific	endoplasmic reticulum	K12666	OST1, RPN1; oligosaccharyltransferase complex subunit alpha (ribophorin I)	mmu00510 N-Glycan biosynthesis; mmu00513 Various types of N-glycan biosynthesis; mmu01100 Metabolic pathways; mmu04141 Protein processing in endoplasmic reticulum	GO:0043413 macromolecule glycosylation; GO:0044267 cellular protein metabolic process; GO:0044699 single-organism process; GO:0009058 biosynthetic process; GO:0018196 peptidyl-asparagine modification; GO:0044237 cellular metabolic process; GO:0071704 organic substance metabolic process; GO:0008152 metabolic process; GO:1901137 carbohydrate derivative biosynthetic process; GO:1901135 carbohydrate …	GO:0016020 membrane; GO:0042175 nuclear outer membrane-endoplasmic reticulum membrane network; GO:0005783 endoplasmic reticulum; GO:0044421 extracellular region part; GO:0031410 cytoplasmic vesicle; GO:0031982 vesicle; GO:0005737 cytoplasm; GO:0031224 intrinsic component of membrane; GO:0032991 macromolecular complex; GO:0044424 intracellular part; GO:0005623 cell; GO:0044422 organelle part; GO:0…	GO:0097159 organic cyclic compound binding; GO:1901363 heterocyclic compound binding; GO:0003723 RNA binding; GO:0004579 dolichyl-diphosphooligosaccharide-protein glycotransferase activity; GO:0016758 transferase activity, transferring hexosyl groups; GO:0003824 catalytic activity; GO:0005488 binding; GO:0003676 nucleic acid binding; GO:0016757 transferase activity, transferring glycosyl groups; …			O	KOG2291	Oligosaccharyltransferase, alpha subunit (ribophorin I)
Q91YT0	Specific	mitochondria	K03942	NDUFV1; NADH dehydrogenase (ubiquinone) flavoprotein 1 [EC:1.6.5.3 1.6.99.3]	mmu00190 Oxidative phosphorylation; mmu01100 Metabolic pathways; mmu04714 Thermogenesis; mmu04723 Retrograde endocannabinoid signaling; mmu04932 Non-alcoholic fatty liver disease (NAFLD); mmu05010 Alzheimer disease; mmu05012 Parkinson disease; mmu05016 Huntington disease	GO:0044699 single-organism process; GO:0008152 metabolic process; GO:0055114 oxidation-reduction process; GO:0044710 single-organism metabolic process;	GO:0016020 membrane; GO:0098800 inner mitochondrial membrane protein complex; GO:0031090 organelle membrane; GO:0098796 membrane protein complex; GO:0005737 cytoplasm; GO:0032991 macromolecular complex; GO:0045271 respiratory chain complex I; GO:0044424 intracellular part; GO:0098798 mitochondrial protein complex; GO:0005747 mitochondrial respiratory chain complex I; GO:0005623 cell; GO:0044455 m…	GO:0016651 oxidoreductase activity, acting on NAD(P)H; GO:1901265 nucleoside phosphate binding; GO:0043167 ion binding; GO:0050136 NADH dehydrogenase (quinone) activity; GO:0005515 protein binding; GO:0000166 nucleotide binding; GO:0051539 4 iron, 4 sulfur cluster binding; GO:0048037 cofactor binding; GO:0016655 oxidoreductase activity, acting on NAD(P)H, quinone or similar compound as acceptor; …	IPR011538; IPR019554; IPR019575;	NADH-ubiquinone oxidoreductase 51 kDa subunit, FMN-binding domain; Soluble ligand binding domain; NADH-ubiquinone oxidoreductase 51 kDa subunit, iron-sulphur binding domain;	C	KOG2658	NADH:ubiquinone oxidoreductase, NDUFV1/51kDa subunit
Q922B2	Specific	cytoplasm	K22503		mmu00970 Aminoacyl-tRNA biosynthesis	GO:0006518 peptide metabolic process; GO:0006725 cellular aromatic compound metabolic process; GO:0044267 cellular protein metabolic process; GO:0044699 single-organism process; GO:0006422 aspartyl-tRNA aminoacylation; GO:0009058 biosynthetic process; GO:1901566 organonitrogen compound biosynthetic process; GO:0043039 tRNA aminoacylation; GO:0044237 cellular metabolic process; GO:0071704 organic …	GO:0016020 membrane; GO:0044421 extracellular region part; GO:0005737 cytoplasm; GO:0031982 vesicle; GO:0044424 intracellular part; GO:0005829 cytosol; GO:0005623 cell; GO:0005576 extracellular region; GO:0043226 organelle; GO:0070062 extracellular exosome; GO:0005622 intracellular; GO:0044464 cell part; GO:1903561 extracellular vesicle; GO:0043227 membrane-bounded organelle; GO:0043230 extracell…	GO:0016876 ligase activity, forming aminoacyl-tRNA and related compounds; GO:0003723 RNA binding; GO:0005524 ATP binding; GO:1901265 nucleoside phosphate binding; GO:0004815 aspartate-tRNA ligase activity; GO:0016875 ligase activity, forming carbon-oxygen bonds; GO:0016874 ligase activity; GO:0001882 nucleoside binding; GO:0043167 ion binding; GO:0000166 nucleotide binding; GO:1901363 heterocycli…	IPR012340; IPR004364; IPR004365; IPR006195;	Nucleic acid-binding, OB-fold; Aminoacyl-tRNA synthetase, class II (D/K/N); OB-fold nucleic acid binding domain, AA-tRNA synthetase-type; Aminoacyl-tRNA synthetase, class II;	J	KOG0556	Aspartyl-tRNA synthetase
Q922D8	Specific	cytoplasm	K00288	MTHFD; methylenetetrahydrofolate dehydrogenase (NADP+) / methenyltetrahydrofolate cyclohydrolase / formyltetrahydrofolate synthetase [EC:1.5.1.5 3.5.4.9 6.3.4.3]	mmu00670 One carbon pool by folate; mmu01100 Metabolic pathways	GO:0042559 pteridine-containing compound biosynthetic process; GO:0065008 regulation of biological quality; GO:0000097 sulfur amino acid biosynthetic process; GO:0035148 tube formation; GO:0043009 chordate embryonic development; GO:0002262 myeloid cell homeostasis; GO:0052803 imidazole-containing compound metabolic process; GO:0042398 cellular modified amino acid biosynthetic process; GO:0009257 …	GO:0043229 intracellular organelle; GO:0016020 membrane; GO:0044421 extracellular region part; GO:0031982 vesicle; GO:0005737 cytoplasm; GO:0044424 intracellular part; GO:0005829 cytosol; GO:0005623 cell; GO:0005576 extracellular region; GO:0005739 mitochondrion; GO:0043231 intracellular membrane-bounded organelle; GO:0043226 organelle; GO:0070062 extracellular exosome; GO:0005622 intracellular; …	GO:0016645 oxidoreductase activity, acting on the CH-NH group of donors; GO:1901265 nucleoside phosphate binding; GO:0016874 ligase activity; GO:0004488 methylenetetrahydrofolate dehydrogenase (NADP+) activity; GO:0016787 hydrolase activity; GO:0097159 organic cyclic compound binding; GO:1901363 heterocyclic compound binding; GO:0016646 oxidoreductase activity, acting on the CH-NH group of donors…	IPR020631; IPR027417; IPR016040; IPR020630;	Tetrahydrofolate dehydrogenase/cyclohydrolase, NAD(P)-binding domain; P-loop containing nucleoside triphosphate hydrolase; NAD(P)-binding domain; Tetrahydrofolate dehydrogenase/cyclohydrolase, catalytic domain;	H	KOG4230	C1-tetrahydrofolate synthase
Q922Q1	Specific	mitochondria				GO:0008152 metabolic process; GO:0042126 nitrate metabolic process; GO:0055114 oxidation-reduction process; GO:0044710 single-organism metabolic process; GO:0044281 small molecule metabolic process; GO:0044763 single-organism cellular process; GO:0006807 nitrogen compound metabolic process; GO:0044699 single-organism process; GO:2001057 reactive nitrogen species metabolic process; GO:0006082 orga…	GO:0016020 membrane; GO:0019867 outer membrane; GO:0044421 extracellular region part; GO:0031090 organelle membrane; GO:0005737 cytoplasm; GO:0031982 vesicle; GO:0044424 intracellular part; GO:0005623 cell; GO:0044422 organelle part; GO:0005740 mitochondrial envelope; GO:0070062 extracellular exosome; GO:0005622 intracellular; GO:0044464 cell part; GO:0098805 whole membrane; GO:0042579 microbody;…	GO:0043167 ion binding; GO:0043546 molybdopterin cofactor binding; GO:0048037 cofactor binding; GO:0030170 pyridoxal phosphate binding; GO:0016491 oxidoreductase activity; GO:1901363 heterocyclic compound binding; GO:0097159 organic cyclic compound binding; GO:0046914 transition metal ion binding; GO:0030151 molybdenum ion binding; GO:0003824 catalytic activity; GO:0005488 binding; GO:0016661 oxi…	IPR011037; IPR005303; IPR005302;	Pyruvate kinase-like, insert domain; MOSC, N-terminal beta barrel; Molybdenum cofactor sulfurase, C-terminal;	R	KOG2362	Uncharacterized Fe-S protein
Q922Q8	Specific	cytoplasm				GO:0098609 cell-cell adhesion; GO:0022610 biological adhesion; GO:0007155 cell adhesion;	GO:0016020 membrane; GO:0042175 nuclear outer membrane-endoplasmic reticulum membrane network; GO:0005783 endoplasmic reticulum; GO:0031090 organelle membrane; GO:0030054 cell junction; GO:0005737 cytoplasm; GO:0031224 intrinsic component of membrane; GO:0044424 intracellular part; GO:0005913 cell-cell adherens junction; GO:0005911 cell-cell junction; GO:0005623 cell; GO:0044422 organelle part; G…	GO:0097159 organic cyclic compound binding; GO:1901363 heterocyclic compound binding; GO:0003723 RNA binding; GO:0098641 cadherin binding involved in cell-cell adhesion; GO:0050839 cell adhesion molecule binding; GO:0098631 protein binding involved in cell adhesion; GO:0005488 binding; GO:0003676 nucleic acid binding; GO:0045296 cadherin binding; GO:0005515 protein binding; GO:0098632 protein bin…	IPR032675;	Leucine-rich repeat domain, L domain-like;	S	KOG0473	Leucine-rich repeat protein
Q99JR1	Specific	cytoplasm	K23500			GO:0044707 single-multicellular organism process; GO:0065008 regulation of biological quality; GO:0055076 transition metal ion homeostasis; GO:0034220 ion transmembrane transport; GO:0030001 metal ion transport; GO:0002262 myeloid cell homeostasis; GO:0048869 cellular developmental process; GO:0055072 iron ion homeostasis; GO:0044699 single-organism process; GO:0006826 iron ion transport; GO:0051…	GO:0043229 intracellular organelle; GO:0016020 membrane; GO:0044429 mitochondrial part; GO:0031090 organelle membrane; GO:0031967 organelle envelope; GO:0044446 intracellular organelle part; GO:0005737 cytoplasm; GO:0031224 intrinsic component of membrane; GO:0044424 intracellular part; GO:0005623 cell; GO:0016021 integral component of membrane; GO:0044422 organelle part; GO:0005739 mitochondrion…	GO:0022892 substrate-specific transporter activity; GO:0015075 ion transmembrane transporter activity; GO:0005215 transporter activity; GO:0022857 transmembrane transporter activity; GO:0022891 substrate-specific transmembrane transporter activity;			R	KOG3767	Sideroflexin
Q99K67	Specific	mitochondria	K14157	AASS; alpha-aminoadipic semialdehyde synthase [EC:1.5.1.8 1.5.1.9]	mmu00310 Lysine degradation; mmu01100 Metabolic pathways	GO:1901606 alpha-amino acid catabolic process; GO:0009066 aspartate family amino acid metabolic process; GO:0033512 L-lysine catabolic process to acetyl-CoA via saccharopine; GO:0044699 single-organism process; GO:0046440 L-lysine metabolic process; GO:0044237 cellular metabolic process; GO:0019474 L-lysine catabolic process to acetyl-CoA; GO:0071704 organic substance metabolic process; GO:000815…	GO:0043231 intracellular membrane-bounded organelle; GO:0043226 organelle; GO:0043229 intracellular organelle; GO:0044464 cell part; GO:0005622 intracellular; GO:0005737 cytoplasm; GO:0044424 intracellular part; GO:0043227 membrane-bounded organelle; GO:0005623 cell; GO:0005739 mitochondrion; GO:0044444 cytoplasmic part;	GO:0016645 oxidoreductase activity, acting on the CH-NH group of donors; GO:0047130 saccharopine dehydrogenase (NADP+, L-lysine-forming) activity; GO:0016646 oxidoreductase activity, acting on the CH-NH group of donors, NAD or NADP as acceptor; GO:0003824 catalytic activity; GO:0047131 saccharopine dehydrogenase (NAD+, L-glutamate-forming) activity; GO:0004753 saccharopine dehydrogenase activity;…	IPR007698; IPR005097; IPR016040; IPR007886; IPR032095;	Alanine dehydrogenase/pyridine nucleotide transhydrogenase, NAD(H)-binding domain; Saccharopine dehydrogenase, NADP binding domain; NAD(P)-binding domain; Alanine dehydrogenase/pyridine nucleotide transhydrogenase, N-terminal; Saccharopine dehydrogenase, C-terminal;	E	KOG0172	Lysine-ketoglutarate reductase/saccharopine dehydrogenase
Q99L04	Specific	extracellular	K11163	DHRS1; dehydrogenase/reductase SDR family member 1 [EC:1.1.-.-]		GO:0044699 single-organism process; GO:0008152 metabolic process; GO:0055114 oxidation-reduction process; GO:0044710 single-organism metabolic process;	GO:0016020 membrane; GO:0043229 intracellular organelle; GO:0005783 endoplasmic reticulum; GO:0044429 mitochondrial part; GO:0031090 organelle membrane; GO:0031967 organelle envelope; GO:0044446 intracellular organelle part; GO:0005737 cytoplasm; GO:0012505 endomembrane system; GO:0044424 intracellular part; GO:0005623 cell; GO:0044422 organelle part; GO:0005739 mitochondrion; GO:0005740 mitochon…	GO:0003824 catalytic activity; GO:0016491 oxidoreductase activity;	IPR016040;	NAD(P)-binding domain;	R	KOG0725	Reductases with broad range of substrate specificities
Q99LB7	Specific	mitochondria	K00314	SARDH; sarcosine dehydrogenase [EC:1.5.8.3]	mmu00260 Glycine, serine and threonine metabolism; mmu01100 Metabolic pathways	GO:1901606 alpha-amino acid catabolic process; GO:0044699 single-organism process; GO:1901053 sarcosine catabolic process; GO:0044237 cellular metabolic process; GO:0071704 organic substance metabolic process; GO:0008152 metabolic process; GO:0006520 cellular amino acid metabolic process; GO:0006575 cellular modified amino acid metabolic process; GO:0044248 cellular catabolic process; GO:0009987 …	GO:0005759 mitochondrial matrix; GO:0043229 intracellular organelle; GO:0044429 mitochondrial part; GO:0005737 cytoplasm; GO:0044446 intracellular organelle part; GO:0044424 intracellular part; GO:0005623 cell; GO:0005739 mitochondrion; GO:0044422 organelle part; GO:0031974 membrane-enclosed lumen; GO:0043226 organelle; GO:0043231 intracellular membrane-bounded organelle; GO:0070013 intracellular…	GO:0008480 sarcosine dehydrogenase activity; GO:0016645 oxidoreductase activity, acting on the CH-NH group of donors; GO:0046997 oxidoreductase activity, acting on the CH-NH group of donors, flavin as acceptor; GO:0005515 protein binding; GO:0003824 catalytic activity; GO:0005488 binding; GO:0016491 oxidoreductase activity;	IPR006076; IPR029043; IPR032503; IPR006222; IPR013977; IPR027266; IPR023753;	FAD dependent oxidoreductase; Glycine cleavage T-protein/YgfZ, C-terminal domain; FAD dependent oxidoreductase, central domain; Glycine cleavage T-protein-like, N-terminal; Glycine cleavage T-protein, C-terminal barrel domain; GTP-binding protein TrmE/Glycine cleavage system T protein, domain 1; FAD/NAD(P)-binding domain;	E	KOG2844	Dimethylglycine dehydrogenase precursor
Q99LC3	Specific	mitochondria	K03954	NDUFA10; NADH dehydrogenase (ubiquinone) 1 alpha subcomplex subunit 10	mmu00190 Oxidative phosphorylation; mmu01100 Metabolic pathways; mmu04714 Thermogenesis; mmu04723 Retrograde endocannabinoid signaling; mmu04932 Non-alcoholic fatty liver disease (NAFLD); mmu05010 Alzheimer disease; mmu05012 Parkinson disease; mmu05016 Huntington disease	GO:0016310 phosphorylation; GO:0009116 nucleoside metabolic process; GO:0042278 purine nucleoside metabolic process; GO:0006725 cellular aromatic compound metabolic process; GO:0009167 purine ribonucleoside monophosphate metabolic process; GO:0042773 ATP synthesis coupled electron transport; GO:0009259 ribonucleotide metabolic process; GO:0009117 nucleotide metabolic process; GO:0044699 single-or…	GO:0016020 membrane; GO:0098800 inner mitochondrial membrane protein complex; GO:0031090 organelle membrane; GO:0098796 membrane protein complex; GO:0005737 cytoplasm; GO:0045271 respiratory chain complex I; GO:0032991 macromolecular complex; GO:0098798 mitochondrial protein complex; GO:0044424 intracellular part; GO:0005747 mitochondrial respiratory chain complex I; GO:0044455 mitochondrial memb…	GO:0050136 NADH dehydrogenase (quinone) activity; GO:0016651 oxidoreductase activity, acting on NAD(P)H; GO:0003954 NADH dehydrogenase activity; GO:0003824 catalytic activity; GO:0016655 oxidoreductase activity, acting on NAD(P)H, quinone or similar compound as acceptor; GO:0008137 NADH dehydrogenase (ubiquinone) activity; GO:0016491 oxidoreductase activity;	IPR027417; IPR031314;	P-loop containing nucleoside triphosphate hydrolase; Deoxynucleoside kinase domain;	C	KOG3877	NADH:ubiquinone oxidoreductase, NDUFA10/42kDa subunit
Q99PG0	Specific	extracellular	K13616	AADAC; arylacetamide deacetylase [EC:3.1.1.3]		GO:0050794 regulation of cellular process; GO:0010898 positive regulation of triglyceride catabolic process; GO:0010896 regulation of triglyceride catabolic process; GO:0080090 regulation of primary metabolic process; GO:0031329 regulation of cellular catabolic process; GO:0009894 regulation of catabolic process; GO:0031331 positive regulation of cellular catabolic process; GO:0048522 positive re…	GO:0016020 membrane; GO:0043229 intracellular organelle; GO:0042175 nuclear outer membrane-endoplasmic reticulum membrane network; GO:0005783 endoplasmic reticulum; GO:0031090 organelle membrane; GO:0044446 intracellular organelle part; GO:0005737 cytoplasm; GO:0031224 intrinsic component of membrane; GO:0012505 endomembrane system; GO:0044424 intracellular part; GO:0005623 cell; GO:0016021 integ…	GO:0052689 carboxylic ester hydrolase activity; GO:0017171 serine hydrolase activity; GO:0003824 catalytic activity; GO:0016788 hydrolase activity, acting on ester bonds; GO:0016787 hydrolase activity; GO:0019213 deacetylase activity; GO:0016298 lipase activity; GO:0004806 triglyceride lipase activity;	IPR029058; IPR013094;	Alpha/Beta hydrolase fold; Alpha/beta hydrolase fold-3;	V	KOG1515	Arylacetamide deacetylase
Q99PL5	Specific	endoplasmic reticulum	K14000	RRBP1; ribosome-binding protein 1	mmu04141 Protein processing in endoplasmic reticulum	GO:0050794 regulation of cellular process; GO:0044700 single organism signaling; GO:0006518 peptide metabolic process; GO:0044267 cellular protein metabolic process; GO:0044699 single-organism process; GO:0009058 biosynthetic process; GO:1901566 organonitrogen compound biosynthetic process; GO:0050896 response to stimulus; GO:0044237 cellular metabolic process; GO:0015031 protein transport; GO:00…	GO:0005840 ribosome; GO:0043229 intracellular organelle; GO:0016020 membrane; GO:0042175 nuclear outer membrane-endoplasmic reticulum membrane network; GO:0005783 endoplasmic reticulum; GO:0043232 intracellular non-membrane-bounded organelle; GO:0044446 intracellular organelle part; GO:0005737 cytoplasm; GO:0031224 intrinsic component of membrane; GO:0012505 endomembrane system; GO:0032991 macrom…	GO:0005515 protein binding; GO:0060089 molecular transducer activity; GO:0004872 receptor activity; GO:0005488 binding;	IPR007794;	Ribosome receptor lysine/proline rich;	K	KOG1999	RNA polymerase II transcription elongation factor DSIF/SUPT5H/SPT5
Q9CPP6	Specific	cytoplasm	K03949	NDUFA5; NADH dehydrogenase (ubiquinone) 1 alpha subcomplex subunit 5	mmu00190 Oxidative phosphorylation; mmu01100 Metabolic pathways; mmu04714 Thermogenesis; mmu04723 Retrograde endocannabinoid signaling; mmu04932 Non-alcoholic fatty liver disease (NAFLD); mmu05010 Alzheimer disease; mmu05012 Parkinson disease; mmu05016 Huntington disease	GO:0008152 metabolic process; GO:0006091 generation of precursor metabolites and energy; GO:0055114 oxidation-reduction process; GO:0044710 single-organism metabolic process; GO:0015980 energy derivation by oxidation of organic compounds; GO:0044763 single-organism cellular process; GO:0044699 single-organism process; GO:0022900 electron transport chain; GO:0022904 respiratory electron transport …	GO:0016020 membrane; GO:0098800 inner mitochondrial membrane protein complex; GO:0031090 organelle membrane; GO:0098796 membrane protein complex; GO:0005737 cytoplasm; GO:0045271 respiratory chain complex I; GO:0032991 macromolecular complex; GO:0044424 intracellular part; GO:0098798 mitochondrial protein complex; GO:0005747 mitochondrial respiratory chain complex I; GO:0044455 mitochondrial memb…	GO:0016651 oxidoreductase activity, acting on NAD(P)H; GO:0003954 NADH dehydrogenase activity; GO:0003824 catalytic activity; GO:0050136 NADH dehydrogenase (quinone) activity; GO:0008137 NADH dehydrogenase (ubiquinone) activity; GO:0016655 oxidoreductase activity, acting on NAD(P)H, quinone or similar compound as acceptor; GO:0016491 oxidoreductase activity;			C	KOG3365	NADH:ubiquinone oxidoreductase, NDUFA5/B13 subunit
Q9CPQ1	Specific	mitochondria	K02268	COX6C; cytochrome c oxidase subunit 6c	mmu00190 Oxidative phosphorylation; mmu01100 Metabolic pathways; mmu04260 Cardiac muscle contraction; mmu04714 Thermogenesis; mmu04932 Non-alcoholic fatty liver disease (NAFLD); mmu05010 Alzheimer disease; mmu05012 Parkinson disease; mmu05016 Huntington disease	GO:0098655 cation transmembrane transport; GO:0034220 ion transmembrane transport; GO:0098660 inorganic ion transmembrane transport; GO:0044699 single-organism process; GO:0006818 hydrogen transport; GO:0015992 proton transport; GO:0051234 establishment of localization; GO:0006810 transport; GO:0055085 transmembrane transport; GO:1902578 single-organism localization; GO:0006812 cation transport; …	GO:0043229 intracellular organelle; GO:0016020 membrane; GO:0044429 mitochondrial part; GO:0031090 organelle membrane; GO:0031967 organelle envelope; GO:0044446 intracellular organelle part; GO:0005737 cytoplasm; GO:0031224 intrinsic component of membrane; GO:0044424 intracellular part; GO:0005623 cell; GO:0016021 integral component of membrane; GO:0044422 organelle part; GO:0005739 mitochondrion…	GO:0015075 ion transmembrane transporter activity; GO:0022892 substrate-specific transporter activity; GO:0015077 monovalent inorganic cation transmembrane transporter activity; GO:0016676 oxidoreductase activity, acting on a heme group of donors, oxygen as acceptor; GO:0016675 oxidoreductase activity, acting on a heme group of donors; GO:0015078 hydrogen ion transmembrane transporter activity; G…
Q9CQN1	Specific	mitochondria	K09488	TRAP1, HSP75; TNF receptor-associated protein 1		GO:0043467 regulation of generation of precursor metabolites and energy; GO:0010941 regulation of cell death; GO:0009968 negative regulation of signal transduction; GO:0010608 posttranscriptional regulation of gene expression; GO:0023051 regulation of signaling; GO:0006457 protein folding; GO:2001233 regulation of apoptotic signaling pathway; GO:1901298 regulation of hydrogen peroxide-mediated pr…	GO:0016020 membrane; GO:0044421 extracellular region part; GO:0031090 organelle membrane; GO:0031982 vesicle; GO:0005737 cytoplasm; GO:0044424 intracellular part; GO:0005623 cell; GO:0044422 organelle part; GO:0043228 non-membrane-bounded organelle; GO:0005740 mitochondrial envelope; GO:0070062 extracellular exosome; GO:0031974 membrane-enclosed lumen; GO:0005654 nucleoplasm; GO:0031970 organelle…	GO:0003723 RNA binding; GO:0005524 ATP binding; GO:1901265 nucleoside phosphate binding; GO:0019901 protein kinase binding; GO:0001882 nucleoside binding; GO:0043167 ion binding; GO:0005515 protein binding; GO:0000166 nucleotide binding; GO:0019900 kinase binding; GO:1901363 heterocyclic compound binding; GO:0097159 organic cyclic compound binding; GO:0032549 ribonucleoside binding; GO:0097367 ca…	IPR020568; IPR020575; IPR003594;	Ribosomal protein S5 domain 2-type fold; Heat shock protein Hsp90, N-terminal; Histidine kinase-like ATPase, C-terminal domain;	O	KOG0019	Molecular chaperone (HSP90 family)
Q9CQR4	Specific	cytoplasm	K17362	ACOT13; acyl-coenzyme A thioesterase 13 [EC:3.1.2.-]		GO:0044085 cellular component biogenesis; GO:0016043 cellular component organization; GO:0051289 protein homotetramerization; GO:0071822 protein complex subunit organization; GO:0022607 cellular component assembly; GO:0051260 protein homooligomerization; GO:0051262 protein tetramerization; GO:0065003 macromolecular complex assembly; GO:0070271 protein complex biogenesis; GO:0009987 cellular proce…	GO:0043229 intracellular organelle; GO:0044421 extracellular region part; GO:0043232 intracellular non-membrane-bounded organelle; GO:0044430 cytoskeletal part; GO:0044446 intracellular organelle part; GO:0005737 cytoplasm; GO:0031982 vesicle; GO:0044424 intracellular part; GO:0005829 cytosol; GO:0005623 cell; GO:0005819 spindle; GO:0005576 extracellular region; GO:0005739 mitochondrion; GO:00444…	GO:0047617 acyl-CoA hydrolase activity; GO:0016787 hydrolase activity; GO:0016289 CoA hydrolase activity; GO:0016790 thiolester hydrolase activity; GO:0003824 catalytic activity; GO:0016788 hydrolase activity, acting on ester bonds;	IPR006683; IPR029069; IPR003736;	Thioesterase domain; HotDog domain; Phenylacetic acid degradation-related domain;	R	KOG3328	HGG motif-containing thioesterase
Q9CQS8	Specific	mitochondria	K09481	SEC61B, SBH2; protein transport protein SEC61 subunit beta	mmu03060 Protein export; mmu04141 Protein processing in endoplasmic reticulum; mmu04145 Phagosome	GO:0072594 establishment of protein localization to organelle; GO:0017038 protein import; GO:0044699 single-organism process; GO:0051169 nuclear transport; GO:0036503 ERAD pathway; GO:0044237 cellular metabolic process; GO:0015031 protein transport; GO:0051234 establishment of localization; GO:0006605 protein targeting; GO:0006612 protein targeting to membrane; GO:0008152 metabolic process; GO:00…	GO:0016020 membrane; GO:0042175 nuclear outer membrane-endoplasmic reticulum membrane network; GO:0005783 endoplasmic reticulum; GO:0030867 rough endoplasmic reticulum membrane; GO:0031090 organelle membrane; GO:0098796 membrane protein complex; GO:0005737 cytoplasm; GO:0031224 intrinsic component of membrane; GO:0032991 macromolecular complex; GO:0044424 intracellular part; GO:0005623 cell; GO:0…	GO:0003723 RNA binding; GO:0048408 epidermal growth factor binding; GO:0005086 ARF guanyl-nucleotide exchange factor activity; GO:0005085 guanyl-nucleotide exchange factor activity; GO:0019838 growth factor binding; GO:0042562 hormone binding; GO:0044877 macromolecular complex binding; GO:0005515 protein binding; GO:0098772 molecular function regulator; GO:1901363 heterocyclic compound binding; G…			O	KOG3457	Sec61 protein translocation complex, beta subunit
Q9CQU3	Specific	plasma membrane				GO:0050794 regulation of cellular process; GO:0007528 neuromuscular junction development; GO:0016043 cellular component organization; GO:1903829 positive regulation of cellular protein localization; GO:1903076 regulation of protein localization to plasma membrane; GO:0048193 Golgi vesicle transport; GO:0044699 single-organism process; GO:0051668 localization within membrane; GO:1903078 positive r…	GO:0043229 intracellular organelle; GO:0016020 membrane; GO:0098588 bounding membrane of organelle; GO:0031090 organelle membrane; GO:0071944 cell periphery; GO:0044446 intracellular organelle part; GO:0005737 cytoplasm; GO:0000139 Golgi membrane; GO:0031224 intrinsic component of membrane; GO:0012505 endomembrane system; GO:0044424 intracellular part; GO:0030173 integral component of Golgi membr…	GO:0033130 acetylcholine receptor binding; GO:0005515 protein binding; GO:0005102 receptor binding; GO:0005488 binding;			U	KOG1688	Golgi proteins involved in ER retention (RER)
Q9CQZ5	Specific	mitochondria	K03950	NDUFA6; NADH dehydrogenase (ubiquinone) 1 alpha subcomplex subunit 6	mmu00190 Oxidative phosphorylation; mmu01100 Metabolic pathways; mmu04714 Thermogenesis; mmu04723 Retrograde endocannabinoid signaling; mmu04932 Non-alcoholic fatty liver disease (NAFLD); mmu05010 Alzheimer disease; mmu05012 Parkinson disease; mmu05016 Huntington disease	GO:0008152 metabolic process; GO:0006950 response to stress; GO:0055114 oxidation-reduction process; GO:0044710 single-organism metabolic process; GO:0006979 response to oxidative stress; GO:0044699 single-organism process; GO:0050896 response to stimulus;	GO:0016020 membrane; GO:0098800 inner mitochondrial membrane protein complex; GO:0031090 organelle membrane; GO:0098796 membrane protein complex; GO:0005737 cytoplasm; GO:0032991 macromolecular complex; GO:0045271 respiratory chain complex I; GO:0044424 intracellular part; GO:0098798 mitochondrial protein complex; GO:0005747 mitochondrial respiratory chain complex I; GO:0005623 cell; GO:0044455 m…				C	KOG3426	NADH:ubiquinone oxidoreductase, NDUFA6/B14 subunit
Q9CR68	Specific	mitochondria	K00411	UQCRFS1, RIP1, petA; ubiquinol-cytochrome c reductase iron-sulfur subunit [EC:1.10.2.2]	mmu00190 Oxidative phosphorylation; mmu01100 Metabolic pathways; mmu04260 Cardiac muscle contraction; mmu04714 Thermogenesis; mmu04932 Non-alcoholic fatty liver disease (NAFLD); mmu05010 Alzheimer disease; mmu05012 Parkinson disease; mmu05016 Huntington disease	GO:0098655 cation transmembrane transport; GO:0034220 ion transmembrane transport; GO:0098660 inorganic ion transmembrane transport; GO:0055114 oxidation-reduction process; GO:0046677 response to antibiotic; GO:0044699 single-organism process; GO:0010033 response to organic substance; GO:0050896 response to stimulus; GO:0015992 proton transport; GO:0006818 hydrogen transport; GO:0051234 establish…	GO:0016020 membrane; GO:0098800 inner mitochondrial membrane protein complex; GO:0031090 organelle membrane; GO:0098796 membrane protein complex; GO:0005737 cytoplasm; GO:0032991 macromolecular complex; GO:0031224 intrinsic component of membrane; GO:0098798 mitochondrial protein complex; GO:0044424 intracellular part; GO:0044455 mitochondrial membrane part; GO:0005623 cell; GO:0044422 organelle p…	GO:0051537 2 iron, 2 sulfur cluster binding; GO:0008121 ubiquinol-cytochrome-c reductase activity; GO:0015075 ion transmembrane transporter activity; GO:0016679 oxidoreductase activity, acting on diphenols and related substances as donors; GO:0044877 macromolecular complex binding; GO:0043167 ion binding; GO:0022892 substrate-specific transporter activity; GO:0005515 protein binding; GO:0015077 m…	IPR006317; IPR017941; IPR015248; IPR005805; IPR011070; IPR004192;	Ubiquinol-cytochrome c reductase, iron-sulphur subunit; Rieske [2Fe-2S] iron-sulphur domain; Ubiquinol-cytochrome c reductase 8kDa, N-terminal; Rieske iron-sulphur protein, C-terminal; Globular protein, non-globular alpha/beta subunit; Ubiquinol cytochrome reductase, transmembrane domain;	C	KOG1671	Ubiquinol cytochrome c reductase, subunit RIP1
Q9CW42	Specific	mitochondria				GO:0008152 metabolic process; GO:0042126 nitrate metabolic process; GO:0055114 oxidation-reduction process; GO:0044710 single-organism metabolic process; GO:0044281 small molecule metabolic process; GO:0044763 single-organism cellular process; GO:0006807 nitrogen compound metabolic process; GO:0044699 single-organism process; GO:2001057 reactive nitrogen species metabolic process; GO:0006082 orga…	GO:0043229 intracellular organelle; GO:0016020 membrane; GO:0019867 outer membrane; GO:0044429 mitochondrial part; GO:0098588 bounding membrane of organelle; GO:0031090 organelle membrane; GO:0005741 mitochondrial outer membrane; GO:0005737 cytoplasm; GO:0044446 intracellular organelle part; GO:0031967 organelle envelope; GO:0031224 intrinsic component of membrane; GO:0044424 intracellular part; …	GO:0043167 ion binding; GO:0043546 molybdopterin cofactor binding; GO:0048037 cofactor binding; GO:0030170 pyridoxal phosphate binding; GO:0016491 oxidoreductase activity; GO:1901363 heterocyclic compound binding; GO:0097159 organic cyclic compound binding; GO:0046914 transition metal ion binding; GO:0030151 molybdenum ion binding; GO:0003824 catalytic activity; GO:0005488 binding; GO:0016661 oxi…	IPR011037; IPR005303; IPR005302;	Pyruvate kinase-like, insert domain; MOSC, N-terminal beta barrel; Molybdenum cofactor sulfurase, C-terminal;	R	KOG2362	Uncharacterized Fe-S protein
Q9CXN7	Specific	cytoplasm				GO:0009058 biosynthetic process; GO:0008152 metabolic process;		GO:0016853 isomerase activity; GO:0003824 catalytic activity;			R	KOG3033	Predicted PhzC/PhzF-type epimerase
Q9CYR6	Specific	cytoplasm	K01836	PGM3; phosphoacetylglucosamine mutase [EC:5.4.2.3]	mmu00520 Amino sugar and nucleotide sugar metabolism; mmu01100 Metabolic pathways	GO:0009226 nucleotide-sugar biosynthetic process; GO:0043413 macromolecule glycosylation; GO:0022414 reproductive process; GO:0044699 single-organism process; GO:0009058 biosynthetic process; GO:0044237 cellular metabolic process; GO:0006796 phosphate-containing compound metabolic process; GO:0008152 metabolic process; GO:1901137 carbohydrate derivative biosynthetic process; GO:0044702 single org…	GO:0044464 cell part; GO:0005622 intracellular; GO:0005737 cytoplasm; GO:0044424 intracellular part; GO:0005829 cytosol; GO:0005623 cell; GO:0044444 cytoplasmic part;	GO:0000287 magnesium ion binding; GO:0016853 isomerase activity; GO:0004610 phosphoacetylglucosamine mutase activity; GO:0003824 catalytic activity; GO:0004614 phosphoglucomutase activity; GO:0005488 binding; GO:0016868 intramolecular transferase activity, phosphotransferases; GO:0043167 ion binding; GO:0046872 metal ion binding; GO:0043169 cation binding; GO:0016866 intramolecular transferase ac…	IPR005843; IPR016055; IPR005844;	Alpha-D-phosphohexomutase, C-terminal; Alpha-D-phosphohexomutase, alpha/beta/alpha I/II/III; Alpha-D-phosphohexomutase, alpha/beta/alpha domain I;	G	KOG2537	Phosphoglucomutase/phosphomannomutase
Q9CZ13	Specific	mitochondria	K00414	QCR1, UQCRC1; ubiquinol-cytochrome c reductase core subunit 1	mmu00190 Oxidative phosphorylation; mmu01100 Metabolic pathways; mmu04260 Cardiac muscle contraction; mmu04714 Thermogenesis; mmu04932 Non-alcoholic fatty liver disease (NAFLD); mmu05010 Alzheimer disease; mmu05012 Parkinson disease; mmu05016 Huntington disease	GO:0009116 nucleoside metabolic process; GO:0042278 purine nucleoside metabolic process; GO:0009167 purine ribonucleoside monophosphate metabolic process; GO:0009117 nucleotide metabolic process; GO:0044699 single-organism process; GO:0016485 protein processing; GO:0044237 cellular metabolic process; GO:0006796 phosphate-containing compound metabolic process; GO:0006122 mitochondrial electron tra…	GO:0016020 membrane; GO:0098800 inner mitochondrial membrane protein complex; GO:0031090 organelle membrane; GO:0098796 membrane protein complex; GO:0005737 cytoplasm; GO:0032991 macromolecular complex; GO:0031224 intrinsic component of membrane; GO:0098798 mitochondrial protein complex; GO:0044424 intracellular part; GO:0044455 mitochondrial membrane part; GO:0005623 cell; GO:0044422 organelle p…	GO:0004222 metalloendopeptidase activity; GO:0008233 peptidase activity; GO:0031625 ubiquitin protein ligase binding; GO:0044877 macromolecular complex binding; GO:0043167 ion binding; GO:0005515 protein binding; GO:0016787 hydrolase activity; GO:0008237 metallopeptidase activity; GO:0008270 zinc ion binding; GO:0004175 endopeptidase activity; GO:0046914 transition metal ion binding; GO:0003824 c…	IPR007863; IPR011765; IPR011249; IPR011237;	Peptidase M16, C-terminal; Peptidase M16, N-terminal; Metalloenzyme, LuxS/M16 peptidase-like; Peptidase M16 domain;	O	KOG0960	Mitochondrial processing peptidase, beta subunit, and related enzymes (insulinase superfamily)
Q9CZB0	Specific	plasma membrane	K00236	SDHC, SDH3; succinate dehydrogenase (ubiquinone) cytochrome b560 subunit	mmu00020 Citrate cycle (TCA cycle); mmu00190 Oxidative phosphorylation; mmu01100 Metabolic pathways; mmu01200 Carbon metabolism; mmu04714 Thermogenesis; mmu04932 Non-alcoholic fatty liver disease (NAFLD); mmu05010 Alzheimer disease; mmu05012 Parkinson disease; mmu05016 Huntington disease	GO:0072350 tricarboxylic acid metabolic process; GO:0055114 oxidation-reduction process; GO:0044281 small molecule metabolic process; GO:0044763 single-organism cellular process; GO:0006099 tricarboxylic acid cycle; GO:0044699 single-organism process; GO:0044238 primary metabolic process; GO:0044237 cellular metabolic process; GO:0045333 cellular respiration; GO:0071704 organic substance metaboli…	GO:0016020 membrane; GO:0098800 inner mitochondrial membrane protein complex; GO:0031090 organelle membrane; GO:0098796 membrane protein complex; GO:0005737 cytoplasm; GO:0031224 intrinsic component of membrane; GO:0032991 macromolecular complex; GO:0098798 mitochondrial protein complex; GO:0045281 succinate dehydrogenase complex; GO:0044424 intracellular part; GO:0044455 mitochondrial membrane p…	GO:0097159 organic cyclic compound binding; GO:1901363 heterocyclic compound binding; GO:0009055 electron carrier activity; GO:0016627 oxidoreductase activity, acting on the CH-CH group of donors; GO:0020037 heme binding; GO:0003824 catalytic activity; GO:0005488 binding; GO:0043167 ion binding; GO:0000104 succinate dehydrogenase activity; GO:0046872 metal ion binding; GO:0043169 cation binding; …			G	KOG0449	Succinate dehydrogenase, cytochrome b subunit
Q9CZN7	Specific	mitochondria	K00600	glyA, SHMT; glycine hydroxymethyltransferase [EC:2.1.2.1]	mmu00260 Glycine, serine and threonine metabolism; mmu00630 Glyoxylate and dicarboxylate metabolism; mmu00670 One carbon pool by folate; mmu01100 Metabolic pathways; mmu01200 Carbon metabolism; mmu01230 Biosynthesis of amino acids; mmu01523 Antifolate resistance	GO:0044085 cellular component biogenesis; GO:0070646 protein modification by small protein removal; GO:0016053 organic acid biosynthetic process; GO:0044699 single-organism process; GO:0009058 biosynthetic process; GO:0006544 glycine metabolic process; GO:0035999 tetrahydrofolate interconversion; GO:0044237 cellular metabolic process; GO:0070536 protein K63-linked deubiquitination; GO:0008152 met…	GO:0016020 membrane; GO:0044421 extracellular region part; GO:0031090 organelle membrane; GO:0031982 vesicle; GO:0005737 cytoplasm; GO:0032991 macromolecular complex; GO:0044424 intracellular part; GO:0005623 cell; GO:0044422 organelle part; GO:0043228 non-membrane-bounded organelle; GO:0005740 mitochondrial envelope; GO:0005856 cytoskeleton; GO:0070062 extracellular exosome; GO:0031974 membrane-…	GO:0016597 amino acid binding; GO:0043167 ion binding; GO:0008732 L-allo-threonine aldolase activity; GO:0043177 organic acid binding; GO:0016741 transferase activity, transferring one-carbon groups; GO:0016829 lyase activity; GO:0005515 protein binding; GO:0003682 chromatin binding; GO:0048037 cofactor binding; GO:0030170 pyridoxal phosphate binding; GO:1901363 heterocyclic compound binding; GO:…	IPR015424; IPR015422; IPR015421;	Pyridoxal phosphate-dependent transferase; Pyridoxal phosphate-dependent transferase, major region, subdomain 2; Pyridoxal phosphate-dependent transferase, major region, subdomain 1;	E	KOG2467	Glycine/serine hydroxymethyltransferase
Q9CZS1	Specific	mitochondria	K00128	ALDH; aldehyde dehydrogenase (NAD+) [EC:1.2.1.3]	mmu00010 Glycolysis / Gluconeogenesis; mmu00053 Ascorbate and aldarate metabolism; mmu00071 Fatty acid degradation; mmu00280 Valine, leucine and isoleucine degradation; mmu00310 Lysine degradation; mmu00330 Arginine and proline metabolism; mmu00340 Histidine metabolism; mmu00380 Tryptophan metabolism; mmu00410 beta-Alanine metabolism; mmu00561 Glycerolipid metabolism; mmu00620 Pyruvate metabolism…	GO:1901615 organic hydroxy compound metabolic process; GO:0006066 alcohol metabolic process; GO:0044712 single-organism catabolic process; GO:0055114 oxidation-reduction process; GO:0044281 small molecule metabolic process; GO:0034310 primary alcohol catabolic process; GO:0044699 single-organism process; GO:0044282 small molecule catabolic process; GO:0046164 alcohol catabolic process; GO:0006068…	GO:0005759 mitochondrial matrix; GO:0043229 intracellular organelle; GO:0044429 mitochondrial part; GO:0005737 cytoplasm; GO:0044446 intracellular organelle part; GO:0031981 nuclear lumen; GO:0044424 intracellular part; GO:0005623 cell; GO:0044422 organelle part; GO:0005739 mitochondrion; GO:0043226 organelle; GO:0043231 intracellular membrane-bounded organelle; GO:0031974 membrane-enclosed lumen…	GO:0016620 oxidoreductase activity, acting on the aldehyde or oxo group of donors, NAD or NADP as acceptor; GO:0003824 catalytic activity; GO:0004029 aldehyde dehydrogenase (NAD) activity; GO:0016491 oxidoreductase activity; GO:0016903 oxidoreductase activity, acting on the aldehyde or oxo group of donors;	IPR016161; IPR015590; IPR016162; IPR016163;	Aldehyde/histidinol dehydrogenase; Aldehyde dehydrogenase domain; Aldehyde dehydrogenase N-terminal domain; Aldehyde dehydrogenase, C-terminal;	C	KOG2450	Aldehyde dehydrogenase
Q9D023	Specific	mitochondria	K22139	MPC2; mitochondrial pyruvate carrier 2		GO:0051188 cofactor biosynthetic process; GO:0065008 regulation of biological quality; GO:0019362 pyridine nucleotide metabolic process; GO:0009117 nucleotide metabolic process; GO:0006839 mitochondrial transport; GO:0050796 regulation of insulin secretion; GO:0023051 regulation of signaling; GO:0044699 single-organism process; GO:0051046 regulation of secretion; GO:0009058 biosynthetic process; …	GO:0016020 membrane; GO:0031090 organelle membrane; GO:0005737 cytoplasm; GO:0031305 integral component of mitochondrial inner membrane; GO:0031224 intrinsic component of membrane; GO:0044424 intracellular part; GO:0044455 mitochondrial membrane part; GO:0005623 cell; GO:0031304 intrinsic component of mitochondrial inner membrane; GO:0044422 organelle part; GO:0005740 mitochondrial envelope; GO:0…				S	KOG1589	Uncharacterized conserved protein
Q9D051	Specific	mitochondria	K00162	PDHB, pdhB; pyruvate dehydrogenase E1 component beta subunit [EC:1.2.4.1]	mmu00010 Glycolysis / Gluconeogenesis; mmu00020 Citrate cycle (TCA cycle); mmu00620 Pyruvate metabolism; mmu01100 Metabolic pathways; mmu01200 Carbon metabolism; mmu04066 HIF-1 signaling pathway; mmu04922 Glucagon signaling pathway; mmu05230 Central carbon metabolism in cancer	GO:0051188 cofactor biosynthetic process; GO:0019362 pyridine nucleotide metabolic process; GO:0006725 cellular aromatic compound metabolic process; GO:0046496 nicotinamide nucleotide metabolic process; GO:0009117 nucleotide metabolic process; GO:0044699 single-organism process; GO:0009058 biosynthetic process; GO:0061732 mitochondrial acetyl-CoA biosynthetic process from pyruvate; GO:0072524 pyr…	GO:0044421 extracellular region part; GO:0031982 vesicle; GO:0005737 cytoplasm; GO:0032991 macromolecular complex; GO:0044424 intracellular part; GO:0005623 cell; GO:0044422 organelle part; GO:0070062 extracellular exosome; GO:0031974 membrane-enclosed lumen; GO:0005654 nucleoplasm; GO:1902494 catalytic complex; GO:0070013 intracellular organelle lumen; GO:0044464 cell part; GO:0005622 intracellu…	GO:0016620 oxidoreductase activity, acting on the aldehyde or oxo group of donors, NAD or NADP as acceptor; GO:0034603 pyruvate dehydrogenase [NAD(P)+] activity; GO:0034604 pyruvate dehydrogenase (NAD+) activity; GO:0003824 catalytic activity; GO:0016903 oxidoreductase activity, acting on the aldehyde or oxo group of donors; GO:0004738 pyruvate dehydrogenase activity; GO:0004739 pyruvate dehydrog…	IPR009014; IPR033248; IPR029061; IPR005475;	Transketolase C-terminal/Pyruvate-ferredoxin oxidoreductase domain II; Transketolase, C-terminal domain; Thiamin diphosphate-binding fold; Transketolase-like, pyrimidine-binding domain;	C	KOG0524	Pyruvate dehydrogenase E1, beta subunit
Q9D0E1	Specific	cytoplasm	K12887	HNRNPM; heterogeneous nuclear ribonucleoprotein M	mmu03040 Spliceosome	GO:0006396 RNA processing; GO:0006725 cellular aromatic compound metabolic process; GO:1901360 organic cyclic compound metabolic process; GO:0006807 nitrogen compound metabolic process; GO:0044238 primary metabolic process; GO:0044237 cellular metabolic process; GO:0071704 organic substance metabolic process; GO:0006397 mRNA processing; GO:0016070 RNA metabolic process; GO:0000398 mRNA splicing, …	GO:0016020 membrane; GO:0044421 extracellular region part; GO:0031982 vesicle; GO:0032991 macromolecular complex; GO:0044424 intracellular part; GO:0005623 cell; GO:0016604 nuclear body; GO:0044422 organelle part; GO:0070062 extracellular exosome; GO:0031974 membrane-enclosed lumen; GO:1902494 catalytic complex; GO:0005654 nucleoplasm; GO:0070013 intracellular organelle lumen; GO:0044464 cell par…	GO:0097159 organic cyclic compound binding; GO:1901363 heterocyclic compound binding; GO:0003723 RNA binding; GO:1901265 nucleoside phosphate binding; GO:0005488 binding; GO:0003676 nucleic acid binding; GO:0019904 protein domain specific binding; GO:0005515 protein binding; GO:0000166 nucleotide binding; GO:0036094 small molecule binding;	IPR000504; IPR012677; IPR024666;	RNA recognition motif domain; Nucleotide-binding alpha-beta plait domain; Heterogeneous nuclear ribonucleoprotein M, PY nuclear localisation signal;	A	KOG4212	RNA-binding protein hnRNP-M
Q9D0M3	Specific	mitochondria	K00413	CYC1, CYT1, petC; ubiquinol-cytochrome c reductase cytochrome c1 subunit	mmu00190 Oxidative phosphorylation; mmu01100 Metabolic pathways; mmu04260 Cardiac muscle contraction; mmu04714 Thermogenesis; mmu04932 Non-alcoholic fatty liver disease (NAFLD); mmu05010 Alzheimer disease; mmu05012 Parkinson disease; mmu05016 Huntington disease	GO:0009116 nucleoside metabolic process; GO:0042278 purine nucleoside metabolic process; GO:0009167 purine ribonucleoside monophosphate metabolic process; GO:0009117 nucleotide metabolic process; GO:0006839 mitochondrial transport; GO:0044699 single-organism process; GO:0009058 biosynthetic process; GO:0046129 purine ribonucleoside biosynthetic process; GO:0009163 nucleoside biosynthetic process;…	GO:0016020 membrane; GO:0098800 inner mitochondrial membrane protein complex; GO:0031090 organelle membrane; GO:0098796 membrane protein complex; GO:0005737 cytoplasm; GO:0032991 macromolecular complex; GO:0031224 intrinsic component of membrane; GO:0098798 mitochondrial protein complex; GO:0044424 intracellular part; GO:0044455 mitochondrial membrane part; GO:0005623 cell; GO:0044422 organelle p…	GO:0097159 organic cyclic compound binding; GO:1901363 heterocyclic compound binding; GO:0009055 electron carrier activity; GO:0020037 heme binding; GO:0005488 binding; GO:0043167 ion binding; GO:0046872 metal ion binding; GO:0043169 cation binding; GO:0045155 electron transporter, transferring electrons from CoQH2-cytochrome c reductase complex and cytochrome c oxidase complex activity; GO:00055…	IPR021157; IPR009056;	Cytochrome c1, transmembrane anchor, C-terminal; Cytochrome c-like domain;	C	KOG3052	Cytochrome c1
Q9D0R2	Specific	cytoplasm	K01868	TARS, thrS; threonyl-tRNA synthetase [EC:6.1.1.3]	mmu00970 Aminoacyl-tRNA biosynthesis	GO:0006518 peptide metabolic process; GO:0006725 cellular aromatic compound metabolic process; GO:0044267 cellular protein metabolic process; GO:0044699 single-organism process; GO:0009058 biosynthetic process; GO:1901566 organonitrogen compound biosynthetic process; GO:0043039 tRNA aminoacylation; GO:0044237 cellular metabolic process; GO:0006435 threonyl-tRNA aminoacylation; GO:0071704 organic …	GO:0043229 intracellular organelle; GO:0044421 extracellular region part; GO:0043232 intracellular non-membrane-bounded organelle; GO:0005737 cytoplasm; GO:0031982 vesicle; GO:0044424 intracellular part; GO:0005829 cytosol; GO:0005623 cell; GO:0015629 actin cytoskeleton; GO:0005576 extracellular region; GO:0043228 non-membrane-bounded organelle; GO:0005856 cytoskeleton; GO:0043226 organelle; GO:0…	GO:0016876 ligase activity, forming aminoacyl-tRNA and related compounds; GO:0004829 threonine-tRNA ligase activity; GO:0005524 ATP binding; GO:1901265 nucleoside phosphate binding; GO:0016875 ligase activity, forming carbon-oxygen bonds; GO:0001882 nucleoside binding; GO:0043167 ion binding; GO:0016874 ligase activity; GO:0000166 nucleotide binding; GO:0097159 organic cyclic compound binding; GO…	IPR018163; IPR002314; IPR012675; IPR006195; IPR012947; IPR033728; IPR012676; IPR004095; IPR004154;	Threonyl/alanyl tRNA synthetase, class II-like, putative editing domain; Aminoacyl-tRNA synthetase, class II (G/ P/ S/T); Beta-grasp domain; Aminoacyl-tRNA synthetase, class II; Threonyl/alanyl tRNA synthetase, SAD; Threonine-tRNA ligase catalytic core domain; TGS-like; TGS; Anticodon-binding;	J	KOG1637	Threonyl-tRNA synthetase
Q9D6M3	Specific	plasma membrane	K15107	SLC25A18_22, GC; solute carrier family 25 (mitochondrial glutamate transporter), member 18/22		GO:0034220 ion transmembrane transport; GO:0006839 mitochondrial transport; GO:0015807 L-amino acid transport; GO:0044699 single-organism process; GO:0071702 organic substance transport; GO:0046942 carboxylic acid transport; GO:0015813 L-glutamate transport; GO:0003333 amino acid transmembrane transport; GO:0015849 organic acid transport; GO:0098656 anion transmembrane transport; GO:0015800 acidi…	GO:0043229 intracellular organelle; GO:0016020 membrane; GO:0044429 mitochondrial part; GO:0031090 organelle membrane; GO:0031967 organelle envelope; GO:0044446 intracellular organelle part; GO:0005737 cytoplasm; GO:0031224 intrinsic component of membrane; GO:0044424 intracellular part; GO:0005623 cell; GO:0016021 integral component of membrane; GO:0044422 organelle part; GO:0005739 mitochondrion…	GO:0015294 solute:cation symporter activity; GO:0022804 active transmembrane transporter activity; GO:0015291 secondary active transmembrane transporter activity; GO:0005342 organic acid transmembrane transporter activity; GO:0005310 dicarboxylic acid transmembrane transporter activity; GO:0015075 ion transmembrane transporter activity; GO:0015179 L-amino acid transmembrane transporter activity; …	IPR023395;	Mitochondrial carrier domain;	C	KOG0750	Mitochondrial solute carrier protein
Q9D819	Specific	cytoplasm	K01507	ppa; inorganic pyrophosphatase [EC:3.6.1.1]	mmu00190 Oxidative phosphorylation	GO:0008152 metabolic process; GO:0044237 cellular metabolic process; GO:0006793 phosphorus metabolic process; GO:0009987 cellular process; GO:0006796 phosphate-containing compound metabolic process;	GO:0070062 extracellular exosome; GO:0043226 organelle; GO:0044421 extracellular region part; GO:0044464 cell part; GO:0005622 intracellular; GO:0005737 cytoplasm; GO:0031982 vesicle; GO:1903561 extracellular vesicle; GO:0044424 intracellular part; GO:0005623 cell; GO:0043227 membrane-bounded organelle; GO:0005576 extracellular region; GO:0043230 extracellular organelle;	GO:0000287 magnesium ion binding; GO:0004427 inorganic diphosphatase activity; GO:0016462 pyrophosphatase activity; GO:0003824 catalytic activity; GO:0005488 binding; GO:0043167 ion binding; GO:0046872 metal ion binding; GO:0043169 cation binding; GO:0016817 hydrolase activity, acting on acid anhydrides; GO:0016787 hydrolase activity; GO:0016818 hydrolase activity, acting on acid anhydrides, in p…			C	KOG1626	Inorganic pyrophosphatase/Nucleosome remodeling factor, subunit NURF38
Q9D8N0	Specific	cytoplasm	K03233	EEF1G; elongation factor 1-gamma	mmu05134 Legionellosis	GO:0006518 peptide metabolic process; GO:0044267 cellular protein metabolic process; GO:0009058 biosynthetic process; GO:0044764 multi-organism cellular process; GO:0043207 response to external biotic stimulus; GO:0050896 response to stimulus; GO:1901566 organonitrogen compound biosynthetic process; GO:0051707 response to other organism; GO:0044237 cellular metabolic process; GO:0009607 response …	GO:0043229 intracellular organelle; GO:0016020 membrane; GO:0005783 endoplasmic reticulum; GO:0044421 extracellular region part; GO:0030054 cell junction; GO:0005737 cytoplasm; GO:0031982 vesicle; GO:0070161 anchoring junction; GO:0012505 endomembrane system; GO:0044424 intracellular part; GO:0005913 cell-cell adherens junction; GO:0005911 cell-cell junction; GO:0005623 cell; GO:0005576 extracell…	GO:0097159 organic cyclic compound binding; GO:1901363 heterocyclic compound binding; GO:0003723 RNA binding; GO:0008135 translation factor activity, RNA binding; GO:0098641 cadherin binding involved in cell-cell adhesion; GO:0050839 cell adhesion molecule binding; GO:0003746 translation elongation factor activity; GO:0098631 protein binding involved in cell adhesion; GO:0005488 binding; GO:00036…	IPR004046; IPR010987; IPR001662; IPR004045; IPR012336;	Glutathione S-transferase, C-terminal; Glutathione S-transferase, C-terminal-like; Translation elongation factor EF1B, gamma chain, conserved; Glutathione S-transferase, N-terminal; Thioredoxin-like fold;	J	KOG1627	Translation elongation factor EF-1 gamma
Q9DBA8	Specific	mitochondria	K01468	hutI, AMDHD1; imidazolonepropionase [EC:3.5.2.7]	mmu00340 Histidine metabolism; mmu01100 Metabolic pathways	GO:0043648 dicarboxylic acid metabolic process; GO:1901606 alpha-amino acid catabolic process; GO:0006725 cellular aromatic compound metabolic process; GO:0052803 imidazole-containing compound metabolic process; GO:0044699 single-organism process; GO:0044237 cellular metabolic process; GO:0019556 histidine catabolic process to glutamate and formamide; GO:0071704 organic substance metabolic proces…	GO:0044424 intracellular part; GO:0005623 cell; GO:0044464 cell part; GO:0005622 intracellular; GO:0005737 cytoplasm;	GO:0050480 imidazolonepropionase activity; GO:0003824 catalytic activity; GO:0005488 binding; GO:0043167 ion binding; GO:0016812 hydrolase activity, acting on carbon-nitrogen (but not peptide) bonds, in cyclic amides; GO:0043169 cation binding; GO:0046872 metal ion binding; GO:0016787 hydrolase activity; GO:0016810 hydrolase activity, acting on carbon-nitrogen (but not peptide) bonds;	IPR032466; IPR006680; IPR011059;	Metal-dependent hydrolase; Amidohydrolase-related; Metal-dependent hydrolase, composite domain;	FQ	KOG3968	Atrazine chlorohydrolase/guanine deaminase
Q9DBG1	Specific	mitochondria	K00488	CYP27A; cholestanetriol 26-monooxygenase [EC:1.14.15.15]	mmu00120 Primary bile acid biosynthesis; mmu01100 Metabolic pathways; mmu03320 PPAR signaling pathway; mmu04979 Cholesterol metabolism	GO:0044699 single-organism process; GO:0008152 metabolic process; GO:0055114 oxidation-reduction process; GO:0044710 single-organism metabolic process;	GO:0043229 intracellular organelle; GO:0016020 membrane; GO:0044429 mitochondrial part; GO:0031090 organelle membrane; GO:0031967 organelle envelope; GO:0044446 intracellular organelle part; GO:0005737 cytoplasm; GO:0044424 intracellular part; GO:0005623 cell; GO:0044422 organelle part; GO:0005739 mitochondrion; GO:0005740 mitochondrial envelope; GO:0043231 intracellular membrane-bounded organell…	GO:0097159 organic cyclic compound binding; GO:1901363 heterocyclic compound binding; GO:0020037 heme binding; GO:0005506 iron ion binding; GO:0046914 transition metal ion binding; GO:0003824 catalytic activity; GO:0005488 binding; GO:0043167 ion binding; GO:0016705 oxidoreductase activity, acting on paired donors, with incorporation or reduction of molecular oxygen; GO:0046872 metal ion binding;…			Q	KOG0159	Cytochrome P450 CYP11/CYP12/CYP24/CYP27 subfamilies
Q9DBG6	Specific	extracellular	K12667	SWP1, RPN2; oligosaccharyltransferase complex subunit delta (ribophorin II)	mmu00510 N-Glycan biosynthesis; mmu00513 Various types of N-glycan biosynthesis; mmu01100 Metabolic pathways; mmu04141 Protein processing in endoplasmic reticulum	GO:0043413 macromolecule glycosylation; GO:0044267 cellular protein metabolic process; GO:0044699 single-organism process; GO:0009058 biosynthetic process; GO:0050896 response to stimulus; GO:0044237 cellular metabolic process; GO:0071704 organic substance metabolic process; GO:0042493 response to drug; GO:0008152 metabolic process; GO:1901137 carbohydrate derivative biosynthetic process; GO:1901…	GO:0016020 membrane; GO:0042175 nuclear outer membrane-endoplasmic reticulum membrane network; GO:0005783 endoplasmic reticulum; GO:0031090 organelle membrane; GO:0005737 cytoplasm; GO:0031224 intrinsic component of membrane; GO:0032991 macromolecular complex; GO:0044424 intracellular part; GO:0005623 cell; GO:0044422 organelle part; GO:0005776 autophagosome; GO:1902494 catalytic complex; GO:0044…	GO:0043022 ribosome binding; GO:0003824 catalytic activity; GO:0005488 binding; GO:0044877 macromolecular complex binding; GO:0016757 transferase activity, transferring glycosyl groups; GO:0016740 transferase activity; GO:0043021 ribonucleoprotein complex binding;			O	KOG2447	Oligosaccharyltransferase, delta subunit (ribophorin II)
Q9DBL7	Specific	mitochondria	K02318	COASY; phosphopantetheine adenylyltransferase / dephospho-CoA kinase [EC:2.7.7.3 2.7.1.24]	mmu00770 Pantothenate and CoA biosynthesis; mmu01100 Metabolic pathways	GO:0051188 cofactor biosynthetic process; GO:0009116 nucleoside metabolic process; GO:0042278 purine nucleoside metabolic process; GO:0009117 nucleotide metabolic process; GO:0044699 single-organism process; GO:0009163 nucleoside biosynthetic process; GO:0046129 purine ribonucleoside biosynthetic process; GO:0009058 biosynthetic process; GO:0044237 cellular metabolic process; GO:0006796 phosphate…	GO:0005759 mitochondrial matrix; GO:0043229 intracellular organelle; GO:0044421 extracellular region part; GO:0044429 mitochondrial part; GO:0031982 vesicle; GO:0005737 cytoplasm; GO:0044446 intracellular organelle part; GO:0044424 intracellular part; GO:0005623 cell; GO:0005576 extracellular region; GO:0005739 mitochondrion; GO:0044422 organelle part; GO:0070062 extracellular exosome; GO:0031974…	GO:0005524 ATP binding; GO:1901265 nucleoside phosphate binding; GO:0016773 phosphotransferase activity, alcohol group as acceptor; GO:0001882 nucleoside binding; GO:0043167 ion binding; GO:0000166 nucleotide binding; GO:0070566 adenylyltransferase activity; GO:0097159 organic cyclic compound binding; GO:1901363 heterocyclic compound binding; GO:0032549 ribonucleoside binding; GO:0097367 carbohyd…	IPR014729; IPR004821; IPR027417;	Rossmann-like alpha/beta/alpha sandwich fold; Cytidyltransferase-like domain; P-loop containing nucleoside triphosphate hydrolase;	R	KOG3351	Predicted nucleotidyltransferase
Q9DBW0	Specific	plasma membrane	K07427	CYP4V; cytochrome P450 family 4 subfamily V		GO:0019395 fatty acid oxidation; GO:0034440 lipid oxidation; GO:0010430 fatty acid omega-oxidation; GO:0055114 oxidation-reduction process; GO:0044281 small molecule metabolic process; GO:0044763 single-organism cellular process; GO:0044699 single-organism process; GO:0044255 cellular lipid metabolic process; GO:0006631 fatty acid metabolic process; GO:0044238 primary metabolic process; GO:004423…	GO:0043229 intracellular organelle; GO:0016020 membrane; GO:0042175 nuclear outer membrane-endoplasmic reticulum membrane network; GO:0005783 endoplasmic reticulum; GO:0044446 intracellular organelle part; GO:0005737 cytoplasm; GO:0031224 intrinsic component of membrane; GO:0012505 endomembrane system; GO:0044424 intracellular part; GO:0005623 cell; GO:0016021 integral component of membrane; GO:0…	GO:0097159 organic cyclic compound binding; GO:1901363 heterocyclic compound binding; GO:0020037 heme binding; GO:0005506 iron ion binding; GO:0046914 transition metal ion binding; GO:0003824 catalytic activity; GO:0005488 binding; GO:0043167 ion binding; GO:0016705 oxidoreductase activity, acting on paired donors, with incorporation or reduction of molecular oxygen; GO:0046872 metal ion binding;…			QI	KOG0157	Cytochrome P450 CYP4/CYP19/CYP26 subfamilies
Q9DC69	Specific	mitochondria	K03953	NDUFA9; NADH dehydrogenase (ubiquinone) 1 alpha subcomplex subunit 9	mmu00190 Oxidative phosphorylation; mmu01100 Metabolic pathways; mmu04714 Thermogenesis; mmu04723 Retrograde endocannabinoid signaling; mmu04932 Non-alcoholic fatty liver disease (NAFLD); mmu05010 Alzheimer disease; mmu05012 Parkinson disease; mmu05016 Huntington disease	GO:0051188 cofactor biosynthetic process; GO:0042181 ketone biosynthetic process; GO:1901663 quinone biosynthetic process; GO:0009746 response to hexose; GO:1901700 response to oxygen-containing compound; GO:0044699 single-organism process; GO:0009058 biosynthetic process; GO:0050896 response to stimulus; GO:0009749 response to glucose; GO:0044237 cellular metabolic process; GO:1901004 ubiquinone…	GO:0016020 membrane; GO:0098800 inner mitochondrial membrane protein complex; GO:0031090 organelle membrane; GO:0098796 membrane protein complex; GO:0005737 cytoplasm; GO:0045271 respiratory chain complex I; GO:0032991 macromolecular complex; GO:0098798 mitochondrial protein complex; GO:0044424 intracellular part; GO:0005747 mitochondrial respiratory chain complex I; GO:0044455 mitochondrial memb…	GO:0016651 oxidoreductase activity, acting on NAD(P)H; GO:0003954 NADH dehydrogenase activity; GO:0003824 catalytic activity; GO:0005488 binding; GO:0044877 macromolecular complex binding; GO:0005515 protein binding; GO:0032403 protein complex binding; GO:0016491 oxidoreductase activity;	IPR016040;	NAD(P)-binding domain;	C	KOG2865	NADH:ubiquinone oxidoreductase, NDUFA9/39kDa subunit
Q9DC70	Specific	mitochondria	K03940	NDUFS7; NADH dehydrogenase (ubiquinone) Fe-S protein 7 [EC:1.6.5.3 1.6.99.3]	mmu00190 Oxidative phosphorylation; mmu01100 Metabolic pathways; mmu04714 Thermogenesis; mmu04723 Retrograde endocannabinoid signaling; mmu04932 Non-alcoholic fatty liver disease (NAFLD); mmu05010 Alzheimer disease; mmu05012 Parkinson disease; mmu05016 Huntington disease	GO:0044085 cellular component biogenesis; GO:0016043 cellular component organization; GO:0034622 cellular macromolecular complex assembly; GO:0071822 protein complex subunit organization; GO:0010257 NADH dehydrogenase complex assembly; GO:0055114 oxidation-reduction process; GO:0044699 single-organism process; GO:0043933 macromolecular complex subunit organization; GO:0032981 mitochondrial respir…	GO:0016020 membrane; GO:0098800 inner mitochondrial membrane protein complex; GO:0031090 organelle membrane; GO:0071944 cell periphery; GO:0098796 membrane protein complex; GO:0005737 cytoplasm; GO:0043025 neuronal cell body; GO:0045271 respiratory chain complex I; GO:0032991 macromolecular complex; GO:0044424 intracellular part; GO:0098798 mitochondrial protein complex; GO:0005747 mitochondrial …	GO:0016651 oxidoreductase activity, acting on NAD(P)H; GO:0043167 ion binding; GO:0050136 NADH dehydrogenase (quinone) activity; GO:0005515 protein binding; GO:0051539 4 iron, 4 sulfur cluster binding; GO:0048037 cofactor binding; GO:0016655 oxidoreductase activity, acting on NAD(P)H, quinone or similar compound as acceptor; GO:0008137 NADH dehydrogenase (ubiquinone) activity; GO:0016491 oxidored…	IPR006137;	NADH:ubiquinone oxidoreductase-like, 20kDa subunit;	C	KOG1687	NADH-ubiquinone oxidoreductase, NUFS7/PSST/20 kDa subunit
Q9DCD0	Specific	cytoplasm	K00033	PGD, gnd, gntZ; 6-phosphogluconate dehydrogenase [EC:1.1.1.44 1.1.1.343]	mmu00030 Pentose phosphate pathway; mmu00480 Glutathione metabolism; mmu01100 Metabolic pathways; mmu01200 Carbon metabolism	GO:0006739 NADP metabolic process; GO:0016051 carbohydrate biosynthetic process; GO:0019362 pyridine nucleotide metabolic process; GO:0006725 cellular aromatic compound metabolic process; GO:0046496 nicotinamide nucleotide metabolic process; GO:0009051 pentose-phosphate shunt, oxidative branch; GO:0009117 nucleotide metabolic process; GO:0044699 single-organism process; GO:0009058 biosynthetic pr…	GO:0043229 intracellular organelle; GO:0044421 extracellular region part; GO:0005737 cytoplasm; GO:0031982 vesicle; GO:0044424 intracellular part; GO:0005623 cell; GO:0005576 extracellular region; GO:0043226 organelle; GO:0070062 extracellular exosome; GO:0043231 intracellular membrane-bounded organelle; GO:0005634 nucleus; GO:0005622 intracellular; GO:0044464 cell part; GO:1903561 extracellular …	GO:0016614 oxidoreductase activity, acting on CH-OH group of donors; GO:0016616 oxidoreductase activity, acting on the CH-OH group of donors, NAD or NADP as acceptor; GO:0004616 phosphogluconate dehydrogenase (decarboxylating) activity; GO:0003824 catalytic activity; GO:0016491 oxidoreductase activity;	IPR006115; IPR008927; IPR013328; IPR006114; IPR016040; IPR012284;	6-phosphogluconate dehydrogenase, NADP-binding; 6-phosphogluconate dehydrogenase C-terminal domain-like; 6-phosphogluconate dehydrogenase, domain 2; 6-phosphogluconate dehydrogenase, C-terminal; NAD(P)-binding domain; 6-phosphogluconate dehydrogenase, domain 3;	G	KOG2653	6-phosphogluconate dehydrogenase
Q9DCJ5	Specific	extracellular	K03952	NDUFA8; NADH dehydrogenase (ubiquinone) 1 alpha subcomplex subunit 8	mmu00190 Oxidative phosphorylation; mmu01100 Metabolic pathways; mmu04714 Thermogenesis; mmu04723 Retrograde endocannabinoid signaling; mmu04932 Non-alcoholic fatty liver disease (NAFLD); mmu05010 Alzheimer disease; mmu05012 Parkinson disease; mmu05016 Huntington disease	GO:0044699 single-organism process; GO:0008152 metabolic process; GO:0055114 oxidation-reduction process; GO:0044710 single-organism metabolic process;	GO:0016020 membrane; GO:0098800 inner mitochondrial membrane protein complex; GO:0031090 organelle membrane; GO:0098796 membrane protein complex; GO:0005737 cytoplasm; GO:0045271 respiratory chain complex I; GO:0032991 macromolecular complex; GO:0098798 mitochondrial protein complex; GO:0044424 intracellular part; GO:0005747 mitochondrial respiratory chain complex I; GO:0044455 mitochondrial memb…	GO:0005515 protein binding; GO:0005488 binding; GO:0032403 protein complex binding; GO:0044877 macromolecular complex binding;	IPR010625;	CHCH;	C	KOG3458	NADH:ubiquinone oxidoreductase, NDUFA8/PGIV/19 kDa subunit
Q9DCM2	Specific	cytoplasm	K13299	GSTK1; glutathione S-transferase kappa 1 [EC:2.5.1.18]	mmu00480 Glutathione metabolism; mmu00980 Metabolism of xenobiotics by cytochrome P450; mmu00982 Drug metabolism - cytochrome P450; mmu01100 Metabolic pathways; mmu04146 Peroxisome; mmu05204 Chemical carcinogenesis	GO:0032502 developmental process; GO:0006790 sulfur compound metabolic process; GO:0060429 epithelium development; GO:0009888 tissue development; GO:0006518 peptide metabolic process; GO:0055114 oxidation-reduction process; GO:0048869 cellular developmental process; GO:0009636 response to toxic substance; GO:0044763 single-organism cellular process; GO:0006807 nitrogen compound metabolic process;…	GO:0016020 membrane; GO:0044421 extracellular region part; GO:0031090 organelle membrane; GO:0005737 cytoplasm; GO:0031982 vesicle; GO:0044424 intracellular part; GO:0005623 cell; GO:0044422 organelle part; GO:0005740 mitochondrial envelope; GO:0031974 membrane-enclosed lumen; GO:0070062 extracellular exosome; GO:0070013 intracellular organelle lumen; GO:0005622 intracellular; GO:0044464 cell par…	GO:0004364 glutathione transferase activity; GO:0015035 protein disulfide oxidoreductase activity; GO:0015036 disulfide oxidoreductase activity; GO:0004602 glutathione peroxidase activity; GO:0005102 receptor binding; GO:0003824 catalytic activity; GO:0005488 binding; GO:0016209 antioxidant activity; GO:0016667 oxidoreductase activity, acting on a sulfur group of donors; GO:0016765 transferase ac…	IPR001853; IPR012336;	DSBA-like thioredoxin domain; Thioredoxin-like fold;
Q9DCT2	Specific	mitochondria	K03936	NDUFS3; NADH dehydrogenase (ubiquinone) Fe-S protein 3 [EC:1.6.5.3 1.6.99.3]	mmu00190 Oxidative phosphorylation; mmu01100 Metabolic pathways; mmu04714 Thermogenesis; mmu04723 Retrograde endocannabinoid signaling; mmu04932 Non-alcoholic fatty liver disease (NAFLD); mmu05010 Alzheimer disease; mmu05012 Parkinson disease; mmu05016 Huntington disease	GO:0050794 regulation of cellular process; GO:0044707 single-multicellular organism process; GO:0010941 regulation of cell death; GO:0043069 negative regulation of programmed cell death; GO:0040008 regulation of growth; GO:0009968 negative regulation of signal transduction; GO:0007420 brain development; GO:0023051 regulation of signaling; GO:0043067 regulation of programmed cell death; GO:0044699…	GO:0016020 membrane; GO:0098800 inner mitochondrial membrane protein complex; GO:0031090 organelle membrane; GO:0098796 membrane protein complex; GO:0005737 cytoplasm; GO:0032991 macromolecular complex; GO:0045271 respiratory chain complex I; GO:0044424 intracellular part; GO:0098798 mitochondrial protein complex; GO:0005747 mitochondrial respiratory chain complex I; GO:0016604 nuclear body; GO:0…	GO:0016651 oxidoreductase activity, acting on NAD(P)H; GO:0003954 NADH dehydrogenase activity; GO:0003824 catalytic activity; GO:0050136 NADH dehydrogenase (quinone) activity; GO:0008137 NADH dehydrogenase (ubiquinone) activity; GO:0016655 oxidoreductase activity, acting on NAD(P)H, quinone or similar compound as acceptor; GO:0016491 oxidoreductase activity;	IPR001268;	NADH:ubiquinone oxidoreductase, 30kDa subunit;	C	KOG1713	NADH-ubiquinone oxidoreductase, NDUFS3/30 kDa subunit
Q9DCX2	Specific	cytoplasm	K02138	ATPeF0D, ATP5H, ATP7; F-type H+-transporting ATPase subunit d	mmu00190 Oxidative phosphorylation; mmu01100 Metabolic pathways; mmu04714 Thermogenesis; mmu05010 Alzheimer disease; mmu05012 Parkinson disease; mmu05016 Huntington disease	GO:0009116 nucleoside metabolic process; GO:0042278 purine nucleoside metabolic process; GO:0009167 purine ribonucleoside monophosphate metabolic process; GO:0090662 ATP hydrolysis coupled transmembrane transport; GO:0009117 nucleotide metabolic process; GO:0044699 single-organism process; GO:0009058 biosynthetic process; GO:0009163 nucleoside biosynthetic process; GO:0046129 purine ribonucleosid…	GO:0016020 membrane; GO:0044421 extracellular region part; GO:0098800 inner mitochondrial membrane protein complex; GO:0031090 organelle membrane; GO:0098796 membrane protein complex; GO:0031982 vesicle; GO:0005737 cytoplasm; GO:0032991 macromolecular complex; GO:0098798 mitochondrial protein complex; GO:0044424 intracellular part; GO:0005623 cell; GO:0044455 mitochondrial membrane part; GO:00444…	GO:0015075 ion transmembrane transporter activity; GO:0022892 substrate-specific transporter activity; GO:0015077 monovalent inorganic cation transmembrane transporter activity; GO:0022890 inorganic cation transmembrane transporter activity; GO:0015078 hydrogen ion transmembrane transporter activity; GO:0008324 cation transmembrane transporter activity; GO:0022891 substrate-specific transmembrane…			C	KOG3366	Mitochondrial F1F0-ATP synthase, subunit d/ATP7
Q9DCY0	Specific	cytoplasm,nucleus	K00628	GLYAT; glycine N-acyltransferase / glycine N-benzoyltransferase [EC:2.3.1.13 2.3.1.71]	mmu00360 Phenylalanine metabolism; mmu01100 Metabolic pathways		GO:0043229 intracellular organelle; GO:0099513 polymeric cytoskeletal fiber; GO:0005874 microtubule; GO:0043232 intracellular non-membrane-bounded organelle; GO:0044430 cytoskeletal part; GO:0005737 cytoplasm; GO:0044446 intracellular organelle part; GO:0099512 supramolecular fiber; GO:0044424 intracellular part; GO:0099080 supramolecular complex; GO:0005623 cell; GO:0005739 mitochondrion; GO:004…	GO:0016746 transferase activity, transferring acyl groups; GO:0016747 transferase activity, transferring acyl groups other than amino-acyl groups; GO:0003824 catalytic activity; GO:0016740 transferase activity; GO:0047961 glycine N-acyltransferase activity; GO:0016410 N-acyltransferase activity;	IPR015938; IPR016181; IPR013652;	Glycine N-acyltransferase, N-terminal; Acyl-CoA N-acyltransferase; Glycine N-acyltransferase, C-terminal;
Q9DD20	Specific	extracellular				GO:0008152 metabolic process; GO:0032259 methylation;		GO:0016741 transferase activity, transferring one-carbon groups; GO:0008168 methyltransferase activity; GO:0003824 catalytic activity; GO:0016740 transferase activity;	IPR029063; IPR013216;	S-adenosyl-L-methionine-dependent methyltransferase; Methyltransferase type 11;	R	KOG4300	Predicted methyltransferase
Q9EQ06	Specific	endoplasmic reticulum				GO:0065008 regulation of biological quality; GO:0006710 androgen catabolic process; GO:0044699 single-organism process; GO:0009058 biosynthetic process; GO:0044237 cellular metabolic process; GO:0071704 organic substance metabolic process; GO:0008610 lipid biosynthetic process; GO:0008209 androgen metabolic process; GO:0008152 metabolic process; GO:1901361 organic cyclic compound catabolic proces…	GO:0043226 organelle; GO:0043229 intracellular organelle; GO:0043232 intracellular non-membrane-bounded organelle; GO:0044464 cell part; GO:0005622 intracellular; GO:0005737 cytoplasm; GO:0044424 intracellular part; GO:0005811 lipid particle; GO:0005623 cell; GO:0005576 extracellular region; GO:0043228 non-membrane-bounded organelle;	GO:0016614 oxidoreductase activity, acting on CH-OH group of donors; GO:0016229 steroid dehydrogenase activity; GO:0016616 oxidoreductase activity, acting on the CH-OH group of donors, NAD or NADP as acceptor; GO:0004303 estradiol 17-beta-dehydrogenase activity; GO:0033764 steroid dehydrogenase activity, acting on the CH-OH group of donors, NAD or NADP as acceptor; GO:0003824 catalytic activity; …	IPR016040;	NAD(P)-binding domain;	Q	KOG1201	Hydroxysteroid 17-beta dehydrogenase 11
Q9ERS2	Specific	cytoplasm	K11353	NDUFA13; NADH dehydrogenase (ubiquinone) 1 alpha subcomplex subunit 13	mmu00190 Oxidative phosphorylation; mmu01100 Metabolic pathways; mmu04714 Thermogenesis; mmu04723 Retrograde endocannabinoid signaling; mmu04932 Non-alcoholic fatty liver disease (NAFLD); mmu05010 Alzheimer disease; mmu05012 Parkinson disease; mmu05016 Huntington disease	GO:0044700 single organism signaling; GO:0010941 regulation of cell death; GO:0032270 positive regulation of cellular protein metabolic process; GO:0007166 cell surface receptor signaling pathway; GO:0044237 cellular metabolic process; GO:0071345 cellular response to cytokine stimulus; GO:0015031 protein transport; GO:0045039 protein import into mitochondrial inner membrane; GO:0001558 regulation…	GO:0016020 membrane; GO:0044421 extracellular region part; GO:0098800 inner mitochondrial membrane protein complex; GO:0031090 organelle membrane; GO:0098796 membrane protein complex; GO:0031982 vesicle; GO:0005737 cytoplasm; GO:0031224 intrinsic component of membrane; GO:0045271 respiratory chain complex I; GO:0032991 macromolecular complex; GO:0098798 mitochondrial protein complex; GO:0044424 i…	GO:0016651 oxidoreductase activity, acting on NAD(P)H; GO:0005524 ATP binding; GO:1901265 nucleoside phosphate binding; GO:0001882 nucleoside binding; GO:0043167 ion binding; GO:0050136 NADH dehydrogenase (quinone) activity; GO:0000166 nucleotide binding; GO:0016655 oxidoreductase activity, acting on NAD(P)H, quinone or similar compound as acceptor; GO:0008137 NADH dehydrogenase (ubiquinone) acti…			CD	KOG3300	NADH:ubiquinone oxidoreductase, B16.6 subunit/cell death-regulatory protein
Q9JHI5	Specific	mitochondria	K00253	IVD, ivd; isovaleryl-CoA dehydrogenase [EC:1.3.8.4]	mmu00280 Valine, leucine and isoleucine degradation; mmu01100 Metabolic pathways	GO:1901606 alpha-amino acid catabolic process; GO:0044712 single-organism catabolic process; GO:0055114 oxidation-reduction process; GO:0044281 small molecule metabolic process; GO:0044763 single-organism cellular process; GO:0044699 single-organism process; GO:0006807 nitrogen compound metabolic process; GO:0044282 small molecule catabolic process; GO:0044238 primary metabolic process; GO:190160…	GO:0016020 membrane; GO:0005759 mitochondrial matrix; GO:0043229 intracellular organelle; GO:0044429 mitochondrial part; GO:0031090 organelle membrane; GO:0031967 organelle envelope; GO:0005737 cytoplasm; GO:0044446 intracellular organelle part; GO:0031981 nuclear lumen; GO:0044424 intracellular part; GO:0005623 cell; GO:0005739 mitochondrion; GO:0044422 organelle part; GO:0005740 mitochondrial e…	GO:1901265 nucleoside phosphate binding; GO:0050660 flavin adenine dinucleotide binding; GO:0008470 isovaleryl-CoA dehydrogenase activity; GO:0043167 ion binding; GO:0000166 nucleotide binding; GO:0048037 cofactor binding; GO:0016491 oxidoreductase activity; GO:0016627 oxidoreductase activity, acting on the CH-CH group of donors; GO:1901363 heterocyclic compound binding; GO:0097159 organic cyclic…	IPR013786; IPR009100; IPR006091; IPR009075;	Acyl-CoA dehydrogenase/oxidase, N-terminal; Acyl-CoA dehydrogenase/oxidase, N-terminal and middle domain; Acyl-CoA oxidase/dehydrogenase, central domain; Acyl-CoA dehydrogenase/oxidase C-terminal;	EI	KOG0141	Isovaleryl-CoA dehydrogenase
Q9JKV1	Specific	mitochondria	K06691	RPN13; 26S proteasome regulatory subunit N13	mmu03050 Proteasome; mmu05169 Epstein-Barr virus infection	GO:0044700 single organism signaling; GO:0044085 cellular component biogenesis; GO:0002694 regulation of leukocyte activation; GO:0060398 regulation of growth hormone receptor signaling pathway; GO:0048732 gland development; GO:0032270 positive regulation of cellular protein metabolic process; GO:0022414 reproductive process; GO:0097659 nucleic acid-templated transcription; GO:0008584 male gonad …	GO:0016020 membrane; GO:0071944 cell periphery; GO:0005838 proteasome regulatory particle; GO:0005737 cytoplasm; GO:0032991 macromolecular complex; GO:0044424 intracellular part; GO:0005623 cell; GO:0044422 organelle part; GO:1905369 endopeptidase complex; GO:0031974 membrane-enclosed lumen; GO:0005654 nucleoplasm; GO:1902494 catalytic complex; GO:0070013 intracellular organelle lumen; GO:0022624…	GO:0044877 macromolecular complex binding; GO:0061134 peptidase regulator activity; GO:0016504 peptidase activator activity; GO:0061133 endopeptidase activator activity; GO:0005515 protein binding; GO:0070628 proteasome binding; GO:0098772 molecular function regulator; GO:0032182 ubiquitin-like protein binding; GO:0002020 protease binding; GO:0030234 enzyme regulator activity; GO:0005488 binding;…	IPR032368;	UCH-binding domain;	R	KOG3037	Cell membrane glycoprotein
Q9JLJ2	Specific	cytoplasm	K00149	ALDH9A1; aldehyde dehydrogenase family 9 member A1 [EC:1.2.1.47 1.2.1.3]	mmu00010 Glycolysis / Gluconeogenesis; mmu00053 Ascorbate and aldarate metabolism; mmu00071 Fatty acid degradation; mmu00280 Valine, leucine and isoleucine degradation; mmu00310 Lysine degradation; mmu00330 Arginine and proline metabolism; mmu00340 Histidine metabolism; mmu00380 Tryptophan metabolism; mmu00410 beta-Alanine metabolism; mmu00561 Glycerolipid metabolism; mmu00620 Pyruvate metabolism…	GO:0001505 regulation of neurotransmitter levels; GO:0065008 regulation of biological quality; GO:0055114 oxidation-reduction process; GO:0044763 single-organism cellular process; GO:0006578 amino-acid betaine biosynthetic process; GO:0006807 nitrogen compound metabolic process; GO:0097164 ammonium ion metabolic process; GO:0006081 cellular aldehyde metabolic process; GO:0044699 single-organism p…	GO:0043229 intracellular organelle; GO:0044421 extracellular region part; GO:0005737 cytoplasm; GO:0031982 vesicle; GO:0044424 intracellular part; GO:0005829 cytosol; GO:0005623 cell; GO:0005576 extracellular region; GO:0005739 mitochondrion; GO:0043231 intracellular membrane-bounded organelle; GO:0043226 organelle; GO:0070062 extracellular exosome; GO:0005622 intracellular; GO:0044464 cell part;…	GO:0016620 oxidoreductase activity, acting on the aldehyde or oxo group of donors, NAD or NADP as acceptor; GO:0047105 4-trimethylammoniobutyraldehyde dehydrogenase activity; GO:0003824 catalytic activity; GO:0019145 aminobutyraldehyde dehydrogenase activity; GO:0016903 oxidoreductase activity, acting on the aldehyde or oxo group of donors; GO:0016491 oxidoreductase activity; GO:0004029 aldehyde …	IPR016161; IPR015590; IPR016162; IPR016163;	Aldehyde/histidinol dehydrogenase; Aldehyde dehydrogenase domain; Aldehyde dehydrogenase N-terminal domain; Aldehyde dehydrogenase, C-terminal;	C	KOG2450	Aldehyde dehydrogenase
Q9QXD1	Specific	cytoplasm	K10214	ACOX2; 3alpha,7alpha,12alpha-trihydroxy-5beta-cholestanoyl-CoA 24-hydroxylase [EC:1.17.99.3]	mmu00120 Primary bile acid biosynthesis; mmu01100 Metabolic pathways; mmu03320 PPAR signaling pathway; mmu04146 Peroxisome	GO:0034440 lipid oxidation; GO:0044699 single-organism process; GO:0044255 cellular lipid metabolic process; GO:0044237 cellular metabolic process; GO:0071704 organic substance metabolic process; GO:0008152 metabolic process; GO:0030258 lipid modification; GO:0044248 cellular catabolic process; GO:0032787 monocarboxylic acid metabolic process; GO:0009987 cellular process; GO:0006629 lipid metabol…	GO:0043231 intracellular membrane-bounded organelle; GO:0043226 organelle; GO:0043229 intracellular organelle; GO:0044464 cell part; GO:0005622 intracellular; GO:0005777 peroxisome; GO:0042579 microbody; GO:0005737 cytoplasm; GO:0044424 intracellular part; GO:0043227 membrane-bounded organelle; GO:0005623 cell; GO:0005739 mitochondrion; GO:0044444 cytoplasmic part;	GO:0016634 oxidoreductase activity, acting on the CH-CH group of donors, oxygen as acceptor; GO:0016725 oxidoreductase activity, acting on CH or CH2 groups; GO:1901265 nucleoside phosphate binding; GO:0050660 flavin adenine dinucleotide binding; GO:0005102 receptor binding; GO:0043167 ion binding; GO:0003997 acyl-CoA oxidase activity; GO:0005515 protein binding; GO:0000166 nucleotide binding; GO:…	IPR029320; IPR009100; IPR013786; IPR006091; IPR002655; IPR009075;	Acyl-coenzyme A oxidase, N-terminal; Acyl-CoA dehydrogenase/oxidase, N-terminal and middle domain; Acyl-CoA dehydrogenase/oxidase, N-terminal; Acyl-CoA oxidase/dehydrogenase, central domain; Acyl-CoA oxidase, C-terminal; Acyl-CoA dehydrogenase/oxidase C-terminal;	I	KOG0136	Acyl-CoA oxidase
Q9QZ85	Specific	cytoplasm,nucleus				GO:0044700 single organism signaling; GO:0050794 regulation of cellular process; GO:0035456 response to interferon-beta; GO:0007166 cell surface receptor signaling pathway; GO:0071310 cellular response to organic substance; GO:0098542 defense response to other organism; GO:0044699 single-organism process; GO:0035458 cellular response to interferon-beta; GO:0043207 response to external biotic stim…	GO:0016020 membrane; GO:0042175 nuclear outer membrane-endoplasmic reticulum membrane network; GO:0044421 extracellular region part; GO:0005783 endoplasmic reticulum; GO:0031090 organelle membrane; GO:0044216 other organism cell; GO:0005737 cytoplasm; GO:0044424 intracellular part; GO:0005623 cell; GO:0018995 host; GO:0044422 organelle part; GO:0043657 host cell; GO:0031965 nuclear membrane; GO:0…	GO:1901265 nucleoside phosphate binding; GO:0001882 nucleoside binding; GO:0043167 ion binding; GO:0016817 hydrolase activity, acting on acid anhydrides; GO:0016787 hydrolase activity; GO:0005515 protein binding; GO:0000166 nucleotide binding; GO:0017111 nucleoside-triphosphatase activity; GO:1901363 heterocyclic compound binding; GO:0097159 organic cyclic compound binding; GO:0032549 ribonucleos…	IPR027417; IPR030385;	P-loop containing nucleoside triphosphate hydrolase; IRG-type guanine nucleotide-binding (G) domain;
Q9R092	Specific	peroxisome	K13369	HSD17B6; 17beta-estradiol 17-dehydrogenase / all-trans-retinol dehydrogenase (NAD+) / 3alpha(17beta)-hydroxysteroid dehydrogenase (NAD+) [EC:1.1.1.62 1.1.1.105 1.1.1.239]	mmu00140 Steroid hormone biosynthesis; mmu00830 Retinol metabolism; mmu01100 Metabolic pathways	GO:0008152 metabolic process; GO:0055114 oxidation-reduction process; GO:0044710 single-organism metabolic process; GO:0008202 steroid metabolic process; GO:0044699 single-organism process; GO:1901360 organic cyclic compound metabolic process; GO:0044238 primary metabolic process; GO:0006629 lipid metabolic process; GO:0071704 organic substance metabolic process;	GO:0010008 endosome membrane; GO:0097708 intracellular vesicle; GO:0016020 membrane; GO:0043229 intracellular organelle; GO:0005783 endoplasmic reticulum; GO:0098588 bounding membrane of organelle; GO:0031410 cytoplasmic vesicle; GO:0031090 organelle membrane; GO:0044446 intracellular organelle part; GO:0031982 vesicle; GO:0005737 cytoplasm; GO:0044433 cytoplasmic vesicle part; GO:0044440 endosom…	GO:0016229 steroid dehydrogenase activity; GO:0016614 oxidoreductase activity, acting on CH-OH group of donors; GO:0016616 oxidoreductase activity, acting on the CH-OH group of donors, NAD or NADP as acceptor; GO:0033764 steroid dehydrogenase activity, acting on the CH-OH group of donors, NAD or NADP as acceptor; GO:0047035 testosterone dehydrogenase (NAD+) activity; GO:0003824 catalytic activity…	IPR016040;	NAD(P)-binding domain;	QR	KOG1610	Corticosteroid 11-beta-dehydrogenase and related short chain-type dehydrogenases
Q9R0H0	Specific	cytoplasm	K00232	E1.3.3.6, ACOX1, ACOX3; acyl-CoA oxidase [EC:1.3.3.6]	mmu00071 Fatty acid degradation; mmu00410 beta-Alanine metabolism; mmu00592 alpha-Linolenic acid metabolism; mmu00640 Propanoate metabolism; mmu01040 Biosynthesis of unsaturated fatty acids; mmu01100 Metabolic pathways; mmu01200 Carbon metabolism; mmu01212 Fatty acid metabolism; mmu03320 PPAR signaling pathway; mmu04024 cAMP signaling pathway; mmu04146 Peroxisome	GO:0065008 regulation of biological quality; GO:0022414 reproductive process; GO:1901568 fatty acid derivative metabolic process; GO:0044699 single-organism process; GO:0044255 cellular lipid metabolic process; GO:0044237 cellular metabolic process; GO:0008152 metabolic process; GO:0006091 generation of precursor metabolites and energy; GO:0030258 lipid modification; GO:0032846 positive regulatio…	GO:0016020 membrane; GO:0031090 organelle membrane; GO:0071944 cell periphery; GO:0005737 cytoplasm; GO:0044438 microbody part; GO:0044424 intracellular part; GO:0005623 cell; GO:0044422 organelle part; GO:0043228 non-membrane-bounded organelle; GO:0005778 peroxisomal membrane; GO:0031974 membrane-enclosed lumen; GO:0005654 nucleoplasm; GO:0070013 intracellular organelle lumen; GO:0005622 intrace…	GO:0016634 oxidoreductase activity, acting on the CH-CH group of donors, oxygen as acceptor; GO:1901265 nucleoside phosphate binding; GO:0047485 protein N-terminus binding; GO:0050660 flavin adenine dinucleotide binding; GO:0005102 receptor binding; GO:0043167 ion binding; GO:0003997 acyl-CoA oxidase activity; GO:0005515 protein binding; GO:0000166 nucleotide binding; GO:0016401 palmitoyl-CoA oxi…	IPR029320; IPR013786; IPR009100; IPR006091; IPR002655; IPR009075;	Acyl-coenzyme A oxidase, N-terminal; Acyl-CoA dehydrogenase/oxidase, N-terminal; Acyl-CoA dehydrogenase/oxidase, N-terminal and middle domain; Acyl-CoA oxidase/dehydrogenase, central domain; Acyl-CoA oxidase, C-terminal; Acyl-CoA dehydrogenase/oxidase C-terminal;	I	KOG0136	Acyl-CoA oxidase
Q9R112	Specific	mitochondria	K22470		mmu00920 Sulfur metabolism; mmu01100 Metabolic pathways	GO:0006790 sulfur compound metabolic process; GO:0008152 metabolic process; GO:0019418 sulfide oxidation; GO:0070221 sulfide oxidation, using sulfide:quinone oxidoreductase; GO:0044710 single-organism metabolic process; GO:0055114 oxidation-reduction process; GO:0044763 single-organism cellular process; GO:0044699 single-organism process; GO:0044237 cellular metabolic process; GO:0009987 cellular…	GO:0016020 membrane; GO:0043229 intracellular organelle; GO:0044429 mitochondrial part; GO:0031090 organelle membrane; GO:0031967 organelle envelope; GO:0044446 intracellular organelle part; GO:0005737 cytoplasm; GO:0044424 intracellular part; GO:0005623 cell; GO:0044422 organelle part; GO:0005739 mitochondrion; GO:0005740 mitochondrial envelope; GO:0043231 intracellular membrane-bounded organell…	GO:0003824 catalytic activity; GO:0005488 binding; GO:0016667 oxidoreductase activity, acting on a sulfur group of donors; GO:0070224 sulfide:quinone oxidoreductase activity; GO:0016672 oxidoreductase activity, acting on a sulfur group of donors, quinone or similar compound as acceptor; GO:0048037 cofactor binding; GO:0048038 quinone binding; GO:0016491 oxidoreductase activity;	IPR023753;	FAD/NAD(P)-binding domain;	C	KOG3851	Sulfide:quinone oxidoreductase/flavo-binding protein
Q9WU19	Specific	cytoplasm	K11517	HAO; (S)-2-hydroxy-acid oxidase [EC:1.1.3.15]	mmu00630 Glyoxylate and dicarboxylate metabolism; mmu01100 Metabolic pathways; mmu01200 Carbon metabolism; mmu04146 Peroxisome	GO:0034440 lipid oxidation; GO:1901615 organic hydroxy compound metabolic process; GO:0006066 alcohol metabolic process; GO:0044699 single-organism process; GO:0044255 cellular lipid metabolic process; GO:0046164 alcohol catabolic process; GO:0050896 response to stimulus; GO:0044237 cellular metabolic process; GO:0009441 glycolate metabolic process; GO:0071704 organic substance metabolic process;…	GO:0043226 organelle; GO:0043231 intracellular membrane-bounded organelle; GO:0043229 intracellular organelle; GO:0044464 cell part; GO:0005622 intracellular; GO:0005777 peroxisome; GO:0042579 microbody; GO:0005737 cytoplasm; GO:0044424 intracellular part; GO:0005623 cell; GO:0043227 membrane-bounded organelle; GO:0044444 cytoplasmic part;	GO:0052852 very-long-chain-(S)-2-hydroxy-acid oxidase activity; GO:1901265 nucleoside phosphate binding; GO:0005102 receptor binding; GO:0043167 ion binding; GO:0008891 glycolate oxidase activity; GO:0005515 protein binding; GO:0000166 nucleotide binding; GO:0052854 medium-chain-(S)-2-hydroxy-acid oxidase activity; GO:0048037 cofactor binding; GO:0052853 long-chain-(S)-2-hydroxy-long-chain-acid o…	IPR013785; IPR000262;	Aldolase-type TIM barrel; FMN-dependent dehydrogenase;	C	KOG0538	Glycolate oxidase
Q9WU79	Specific	mitochondria	K00318	PRODH; proline dehydrogenase [EC:1.5.-.-]	mmu00330 Arginine and proline metabolism; mmu01100 Metabolic pathways	GO:0043648 dicarboxylic acid metabolic process; GO:1901606 alpha-amino acid catabolic process; GO:0044699 single-organism process; GO:0044237 cellular metabolic process; GO:0071704 organic substance metabolic process; GO:0008152 metabolic process; GO:0006520 cellular amino acid metabolic process; GO:0046483 heterocycle metabolic process; GO:0006560 proline metabolic process; GO:0006536 glutamate …	GO:0016020 membrane; GO:0005759 mitochondrial matrix; GO:0043229 intracellular organelle; GO:0044429 mitochondrial part; GO:0031090 organelle membrane; GO:0031967 organelle envelope; GO:0005737 cytoplasm; GO:0044446 intracellular organelle part; GO:0044424 intracellular part; GO:0005623 cell; GO:0005739 mitochondrion; GO:0044422 organelle part; GO:0005740 mitochondrial envelope; GO:0031974 membra…	GO:0016645 oxidoreductase activity, acting on the CH-NH group of donors; GO:0016597 amino acid binding; GO:1901265 nucleoside phosphate binding; GO:0050660 flavin adenine dinucleotide binding; GO:0004657 proline dehydrogenase activity; GO:0043167 ion binding; GO:0043177 organic acid binding; GO:0000166 nucleotide binding; GO:0048037 cofactor binding; GO:0071949 FAD binding; GO:0016491 oxidoreduct…	IPR002872; IPR029041;	Proline dehydrogenase domain; FAD-linked oxidoreductase-like;	E	KOG0186	Proline oxidase
Q9WV68	Specific	cytoplasm	K13237	DECR2; peroxisomal 2,4-dienoyl-CoA reductase [EC:1.3.1.34]	mmu04146 Peroxisome	GO:0033559 unsaturated fatty acid metabolic process; GO:0044711 single-organism biosynthetic process; GO:0016053 organic acid biosynthetic process; GO:0055114 oxidation-reduction process; GO:0044281 small molecule metabolic process; GO:0044763 single-organism cellular process; GO:0044699 single-organism process; GO:0006636 unsaturated fatty acid biosynthetic process; GO:0044255 cellular lipid met…	GO:0043226 organelle; GO:0043231 intracellular membrane-bounded organelle; GO:0043229 intracellular organelle; GO:0044464 cell part; GO:0005622 intracellular; GO:0005777 peroxisome; GO:0042579 microbody; GO:0005737 cytoplasm; GO:0044424 intracellular part; GO:0005623 cell; GO:0043227 membrane-bounded organelle; GO:0044444 cytoplasmic part;	GO:0016627 oxidoreductase activity, acting on the CH-CH group of donors; GO:0016628 oxidoreductase activity, acting on the CH-CH group of donors, NAD or NADP as acceptor; GO:0003824 catalytic activity; GO:0005102 receptor binding; GO:0008670 2,4-dienoyl-CoA reductase (NADPH) activity; GO:0005488 binding; GO:0019166 trans-2-enoyl-CoA reductase (NADPH) activity; GO:0005515 protein binding; GO:00164…	IPR016040;	NAD(P)-binding domain;	R	KOG0725	Reductases with broad range of substrate specificities
Q9WVD5	Specific	cytoplasm	K15101	SLC25A2_15, ORNT; solute carrier family 25 (mitochondrial ornithine transporter) member 2/15		GO:0098655 cation transmembrane transport; GO:0034220 ion transmembrane transport; GO:0006839 mitochondrial transport; GO:0015807 L-amino acid transport; GO:0044699 single-organism process; GO:0071702 organic substance transport; GO:0003333 amino acid transmembrane transport; GO:0046942 carboxylic acid transport; GO:0015849 organic acid transport; GO:0098656 anion transmembrane transport; GO:1903…	GO:0043229 intracellular organelle; GO:0016020 membrane; GO:0044429 mitochondrial part; GO:0031090 organelle membrane; GO:0031967 organelle envelope; GO:0044446 intracellular organelle part; GO:0005737 cytoplasm; GO:0031224 intrinsic component of membrane; GO:0044424 intracellular part; GO:0005623 cell; GO:0016021 integral component of membrane; GO:0044422 organelle part; GO:0005739 mitochondrion…	GO:0005342 organic acid transmembrane transporter activity; GO:0000064 L-ornithine transmembrane transporter activity; GO:0015075 ion transmembrane transporter activity; GO:0015179 L-amino acid transmembrane transporter activity; GO:0022892 substrate-specific transporter activity; GO:0008514 organic anion transmembrane transporter activity; GO:0008324 cation transmembrane transporter activity; GO…	IPR023395;	Mitochondrial carrier domain;	C	KOG0763	Mitochondrial ornithine transporter
Q9WVL0	Specific	mitochondria	K01800	maiA, GSTZ1; maleylacetoacetate isomerase [EC:5.2.1.2]	mmu00350 Tyrosine metabolism; mmu01100 Metabolic pathways	GO:1902222 erythrose 4-phosphate/phosphoenolpyruvate family amino acid catabolic process; GO:1901606 alpha-amino acid catabolic process; GO:0006518 peptide metabolic process; GO:0006725 cellular aromatic compound metabolic process; GO:0044699 single-organism process; GO:0044237 cellular metabolic process; GO:0006559 L-phenylalanine catabolic process; GO:0071704 organic substance metabolic process…	GO:0043226 organelle; GO:0043231 intracellular membrane-bounded organelle; GO:0043229 intracellular organelle; GO:0044464 cell part; GO:0005622 intracellular; GO:0005737 cytoplasm; GO:0044424 intracellular part; GO:0043227 membrane-bounded organelle; GO:0005623 cell; GO:0005739 mitochondrion; GO:0044444 cytoplasmic part;	GO:0004364 glutathione transferase activity; GO:0042802 identical protein binding; GO:0016853 isomerase activity; GO:0003824 catalytic activity; GO:0042803 protein homodimerization activity; GO:0005488 binding; GO:0046983 protein dimerization activity; GO:0016765 transferase activity, transferring alkyl or aryl (other than methyl) groups; GO:0005515 protein binding; GO:0016034 maleylacetoacetate …	IPR010987; IPR004046; IPR034333; IPR034330; IPR004045; IPR012336;	Glutathione S-transferase, C-terminal-like; Glutathione S-transferase, C-terminal; Glutathione S-transferases, class Zeta , N-terminal; Glutathione S-transferases, class Zeta , C-terminal; Glutathione S-transferase, N-terminal; Thioredoxin-like fold;	O	KOG0868	Glutathione S-transferase
Q9Z1Q9	Specific	cytoplasm	K01873	VARS, valS; valyl-tRNA synthetase [EC:6.1.1.9]	mmu00970 Aminoacyl-tRNA biosynthesis	GO:0065008 regulation of biological quality; GO:0006518 peptide metabolic process; GO:0010608 posttranscriptional regulation of gene expression; GO:0044699 single-organism process; GO:0009058 biosynthetic process; GO:0044237 cellular metabolic process; GO:0008152 metabolic process; GO:0006520 cellular amino acid metabolic process; GO:0006418 tRNA aminoacylation for protein translation; GO:0019538…	GO:0043226 organelle; GO:0043231 intracellular membrane-bounded organelle; GO:0043229 intracellular organelle; GO:0044464 cell part; GO:0005622 intracellular; GO:0005737 cytoplasm; GO:0044424 intracellular part; GO:0043227 membrane-bounded organelle; GO:0005623 cell; GO:0005739 mitochondrion; GO:0044444 cytoplasmic part;	GO:0016876 ligase activity, forming aminoacyl-tRNA and related compounds; GO:0002161 aminoacyl-tRNA editing activity; GO:0005524 ATP binding; GO:0052689 carboxylic ester hydrolase activity; GO:1901265 nucleoside phosphate binding; GO:0016875 ligase activity, forming carbon-oxygen bonds; GO:0016874 ligase activity; GO:0001882 nucleoside binding; GO:0043167 ion binding; GO:0016787 hydrolase activit…	IPR014729; IPR013155; IPR009008; IPR004046; IPR010987; IPR002300; IPR033705; IPR009080;	Rossmann-like alpha/beta/alpha sandwich fold; Methionyl/Valyl/Leucyl/Isoleucyl-tRNA synthetase, anticodon-binding; Valyl/Leucyl/Isoleucyl-tRNA synthetase, editing domain; Glutathione S-transferase, C-terminal; Glutathione S-transferase, C-terminal-like; Aminoacyl-tRNA synthetase, class Ia; Valyl tRNA synthetase, anticodon-binding domain; Aminoacyl-tRNA synthetase, class Ia, anticodon-binding;	J	KOG0432	Valyl-tRNA synthetase
Q9Z2I9	Specific	mitochondria	K01900	LSC2; succinyl-CoA synthetase beta subunit [EC:6.2.1.4 6.2.1.5]	mmu00020 Citrate cycle (TCA cycle); mmu00640 Propanoate metabolism; mmu01100 Metabolic pathways; mmu01200 Carbon metabolism	GO:0006790 sulfur compound metabolic process; GO:0072350 tricarboxylic acid metabolic process; GO:0043648 dicarboxylic acid metabolic process; GO:0006104 succinyl-CoA metabolic process; GO:0006105 succinate metabolic process; GO:0055114 oxidation-reduction process; GO:0044281 small molecule metabolic process; GO:0006099 tricarboxylic acid cycle; GO:0044763 single-organism cellular process; GO:003…	GO:0043229 intracellular organelle; GO:0044421 extracellular region part; GO:0005737 cytoplasm; GO:0031982 vesicle; GO:0044424 intracellular part; GO:0005623 cell; GO:0005576 extracellular region; GO:0005739 mitochondrion; GO:0043226 organelle; GO:0070062 extracellular exosome; GO:0043231 intracellular membrane-bounded organelle; GO:0044464 cell part; GO:0043209 myelin sheath; GO:0005622 intracel…	GO:0005524 ATP binding; GO:1901265 nucleoside phosphate binding; GO:0016405 CoA-ligase activity; GO:0001882 nucleoside binding; GO:0043167 ion binding; GO:0016874 ligase activity; GO:0016877 ligase activity, forming carbon-sulfur bonds; GO:0000166 nucleotide binding; GO:0004775 succinate-CoA ligase (ADP-forming) activity; GO:0097159 organic cyclic compound binding; GO:1901363 heterocyclic compoun…	IPR005811; IPR011761; IPR013816; IPR013650; IPR013815; IPR016102;	ATP-citrate lyase/succinyl-CoA ligase; ATP-grasp fold; ATP-grasp fold, subdomain 2; ATP-grasp fold, succinyl-CoA synthetase-type; ATP-grasp fold, subdomain 1; Succinyl-CoA synthetase-like;	C	KOG2799	Succinyl-CoA synthetase, beta subunit
Q9Z2Z6	Specific	plasma membrane	K15109	SLC25A20_29, CACT, CACL, CRC1; solute carrier family 25 (mitochondrial carnitine/acylcarnitine transporter), member 20/29	mmu04714 Thermogenesis	GO:0098655 cation transmembrane transport; GO:0034220 ion transmembrane transport; GO:0015696 ammonium transport; GO:0051181 cofactor transport; GO:0006839 mitochondrial transport; GO:0044699 single-organism process; GO:0072488 ammonium transmembrane transport; GO:0071702 organic substance transport; GO:0015838 amino-acid betaine transport; GO:1902616 acyl carnitine transmembrane transport; GO:00…	GO:0043229 intracellular organelle; GO:0016020 membrane; GO:0044429 mitochondrial part; GO:0031090 organelle membrane; GO:0031967 organelle envelope; GO:0044446 intracellular organelle part; GO:0005737 cytoplasm; GO:0031224 intrinsic component of membrane; GO:0044424 intracellular part; GO:0005829 cytosol; GO:0005623 cell; GO:0016021 integral component of membrane; GO:0044422 organelle part; GO:0…	GO:0022804 active transmembrane transporter activity; GO:0015291 secondary active transmembrane transporter activity; GO:0008519 ammonium transmembrane transporter activity; GO:0015226 carnitine transmembrane transporter activity; GO:0015075 ion transmembrane transporter activity; GO:0015199 amino-acid betaine transmembrane transporter activity; GO:0005476 carnitine:acyl carnitine antiporter acti…	IPR023395;	Mitochondrial carrier domain;	C	KOG0758	Mitochondrial carnitine-acylcarnitine carrier protein
