# Supplementary material for: LncRNA Snhg3 aggravates hepatic steatosis via PPARγ signaling
Source: eLife. 2024 Oct 22;13:RP96988. doi: 10.7554/eLife.96988 (PMC11495842; doi:10.7554/eLife.96988)
Supplement: Figure 6—source data 9. [file elife-96988-fig6-data9.xls]

## Sheet: Peaks_anno
chr	start	end	length	summit	pileup	#NAME?	fold_enrichment	#NAME?	name	Chr	Start	End	Element	Gene	GeneName	NR:Seq-id	NR:Score	NR:Evalue	NR:Description	NT:Seq-id	NT:Score	NT:Evalue	NT:Description	Uniprot:UniProtKB-AC	Uniprot:Score	Uniprot:Evalue	Uniprot:Description	COG:gene	COG:Score	COG:Eval	COG:num	Pfam:pfam_ID	Pfam:pfam_Name	Pfam:pfam_Description	GO:biological_process	GO:cellular_component	GO:molecular_function	KEGG:KO	KEGG:Description
chr15	103060193	103060765	573	103060705	33	7.90693	2.89184	4.08167	3_peak_914	chr15	103059306	103061306	Upstream2k	ENSMUSG00000102297	5730585A16Rik	gi|12860403|dbj|BAB31944.1|	576	1e-70	unnamed protein product [Mus musculus]	gi|76683163|gb|AC162693.5|	1027	0	Mus musculus chromosome 15, clone RP24-89G21, complete sequence	.	.	.	.	.	.	.	.	pfam10441	Urb2	Urb2/Npa2 family. This family includes the Urb2 protein from yeast that are involved in ribosome biogenesis.	.	.	.	.	.
chr14	45573472	45573801	330	45573566	10	6.33149	4.44621	2.82613	3_peak_712	-//-	-//-	-//-	--//--
chr1	4492099	4493768	1670	4493386	54	16.6985	3.79684	11.951	3_peak_1c	chr1	4490456	4492456	Downstream2k	ENSMUSG00000025902	Sox17	gi|148682294|gb|EDL14241.1|	1753	0	SRY-box containing gene 17, isoform CRA_b, partial [Mus musculus]	gi|575501716|ref|NM_001289465.1|	3242	0	Mus musculus SRY (sex determining region Y)-box 17 (Sox17), transcript variant 3, mRNA	Q61473	308	1e-97	Transcription factor SOX-17	SPAC57A10.09c	54.7	9e-08	COG5648	pfam12067	Sox_C_TAD	Sox C-terminal transactivation domain. This domain is found at the C-terminus of the Sox family of transcription factors. It is found associated with pfam00505. It binds to the Armadillo repeats (pfam00514) in Catenin beta-1 (CTNNB1), which is involved in transcriptional regulation. It functions as a transactivating domain (TAD).	GO:0001525|angiogenesis;GO:0060070|canonical Wnt signaling pathway;GO:0060913|cardiac cell fate determination;GO:0003142|cardiogenic plate morphogenesis;GO:0042074|cell migration involved in gastrulation;GO:0061009|common bile duct development;GO:0048617|embryonic foregut morphogenesis;GO:0035050|embryonic heart tube development;GO:0003143|embryonic heart tube morphogenesis;GO:0048568|embryonic o…	GO:0044798|nuclear transcription factor complex;GO:0005634|nucleus;GO:0005667|transcription factor complex;	GO:0008013|beta-catenin binding;GO:0003677|DNA binding;GO:0046982|protein heterodimerization activity;GO:0000981|RNA polymerase II transcription factor activity, sequence-specific DNA binding;GO:0043565|sequence-specific DNA binding;GO:0003713|transcription coactivator activity;GO:0003705|transcription factor activity, RNA polymerase II distal enhancer sequence-specific binding;GO:0003700|transcr…	K04495	SOX17; transcription factor SOX17 (SOX group F)
chr1	4492099	4493768	1670	4493386	54	16.6985	3.79684	11.951	3_peak_1c	chr1	4490457	4492457	Downstream2k	ENSMUSG00000025902	Sox17	gi|148682294|gb|EDL14241.1|	1753	0	SRY-box containing gene 17, isoform CRA_b, partial [Mus musculus]	gi|575501716|ref|NM_001289465.1|	3242	0	Mus musculus SRY (sex determining region Y)-box 17 (Sox17), transcript variant 3, mRNA	Q61473	308	1e-97	Transcription factor SOX-17	SPAC57A10.09c	54.7	9e-08	COG5648	pfam12067	Sox_C_TAD	Sox C-terminal transactivation domain. This domain is found at the C-terminus of the Sox family of transcription factors. It is found associated with pfam00505. It binds to the Armadillo repeats (pfam00514) in Catenin beta-1 (CTNNB1), which is involved in transcriptional regulation. It functions as a transactivating domain (TAD).	GO:0001525|angiogenesis;GO:0060070|canonical Wnt signaling pathway;GO:0060913|cardiac cell fate determination;GO:0003142|cardiogenic plate morphogenesis;GO:0042074|cell migration involved in gastrulation;GO:0061009|common bile duct development;GO:0048617|embryonic foregut morphogenesis;GO:0035050|embryonic heart tube development;GO:0003143|embryonic heart tube morphogenesis;GO:0048568|embryonic o…	GO:0044798|nuclear transcription factor complex;GO:0005634|nucleus;GO:0005667|transcription factor complex;	GO:0008013|beta-catenin binding;GO:0003677|DNA binding;GO:0046982|protein heterodimerization activity;GO:0000981|RNA polymerase II transcription factor activity, sequence-specific DNA binding;GO:0043565|sequence-specific DNA binding;GO:0003713|transcription coactivator activity;GO:0003705|transcription factor activity, RNA polymerase II distal enhancer sequence-specific binding;GO:0003700|transcr…	K04495	SOX17; transcription factor SOX17 (SOX group F)
chr1	4492099	4493768	1670	4493386	54	16.6985	3.79684	11.951	3_peak_1c	chr1	4490464	4492464	Downstream2k	ENSMUSG00000025902	Sox17	gi|148682294|gb|EDL14241.1|	1753	0	SRY-box containing gene 17, isoform CRA_b, partial [Mus musculus]	gi|575501716|ref|NM_001289465.1|	3242	0	Mus musculus SRY (sex determining region Y)-box 17 (Sox17), transcript variant 3, mRNA	Q61473	308	1e-97	Transcription factor SOX-17	SPAC57A10.09c	54.7	9e-08	COG5648	pfam12067	Sox_C_TAD	Sox C-terminal transactivation domain. This domain is found at the C-terminus of the Sox family of transcription factors. It is found associated with pfam00505. It binds to the Armadillo repeats (pfam00514) in Catenin beta-1 (CTNNB1), which is involved in transcriptional regulation. It functions as a transactivating domain (TAD).	GO:0001525|angiogenesis;GO:0060070|canonical Wnt signaling pathway;GO:0060913|cardiac cell fate determination;GO:0003142|cardiogenic plate morphogenesis;GO:0042074|cell migration involved in gastrulation;GO:0061009|common bile duct development;GO:0048617|embryonic foregut morphogenesis;GO:0035050|embryonic heart tube development;GO:0003143|embryonic heart tube morphogenesis;GO:0048568|embryonic o…	GO:0044798|nuclear transcription factor complex;GO:0005634|nucleus;GO:0005667|transcription factor complex;	GO:0008013|beta-catenin binding;GO:0003677|DNA binding;GO:0046982|protein heterodimerization activity;GO:0000981|RNA polymerase II transcription factor activity, sequence-specific DNA binding;GO:0043565|sequence-specific DNA binding;GO:0003713|transcription coactivator activity;GO:0003705|transcription factor activity, RNA polymerase II distal enhancer sequence-specific binding;GO:0003700|transcr…	K04495	SOX17; transcription factor SOX17 (SOX group F)
chr1	4492099	4493768	1670	4493386	54	16.6985	3.79684	11.951	3_peak_1c	chr1	4490466	4492466	Downstream2k	ENSMUSG00000025902	Sox17	gi|148682294|gb|EDL14241.1|	1753	0	SRY-box containing gene 17, isoform CRA_b, partial [Mus musculus]	gi|575501716|ref|NM_001289465.1|	3242	0	Mus musculus SRY (sex determining region Y)-box 17 (Sox17), transcript variant 3, mRNA	Q61473	308	1e-97	Transcription factor SOX-17	SPAC57A10.09c	54.7	9e-08	COG5648	pfam12067	Sox_C_TAD	Sox C-terminal transactivation domain. This domain is found at the C-terminus of the Sox family of transcription factors. It is found associated with pfam00505. It binds to the Armadillo repeats (pfam00514) in Catenin beta-1 (CTNNB1), which is involved in transcriptional regulation. It functions as a transactivating domain (TAD).	GO:0001525|angiogenesis;GO:0060070|canonical Wnt signaling pathway;GO:0060913|cardiac cell fate determination;GO:0003142|cardiogenic plate morphogenesis;GO:0042074|cell migration involved in gastrulation;GO:0061009|common bile duct development;GO:0048617|embryonic foregut morphogenesis;GO:0035050|embryonic heart tube development;GO:0003143|embryonic heart tube morphogenesis;GO:0048568|embryonic o…	GO:0044798|nuclear transcription factor complex;GO:0005634|nucleus;GO:0005667|transcription factor complex;	GO:0008013|beta-catenin binding;GO:0003677|DNA binding;GO:0046982|protein heterodimerization activity;GO:0000981|RNA polymerase II transcription factor activity, sequence-specific DNA binding;GO:0043565|sequence-specific DNA binding;GO:0003713|transcription coactivator activity;GO:0003705|transcription factor activity, RNA polymerase II distal enhancer sequence-specific binding;GO:0003700|transcr…	K04495	SOX17; transcription factor SOX17 (SOX group F)
chr1	4492099	4493768	1670	4493386	54	16.6985	3.79684	11.951	3_peak_1c	chr1	4490930	4492668	Exon	ENSMUSG00000025902	Sox17	gi|148682294|gb|EDL14241.1|	1753	0	SRY-box containing gene 17, isoform CRA_b, partial [Mus musculus]	gi|575501716|ref|NM_001289465.1|	3242	0	Mus musculus SRY (sex determining region Y)-box 17 (Sox17), transcript variant 3, mRNA	Q61473	308	1e-97	Transcription factor SOX-17	SPAC57A10.09c	54.7	9e-08	COG5648	pfam12067	Sox_C_TAD	Sox C-terminal transactivation domain. This domain is found at the C-terminus of the Sox family of transcription factors. It is found associated with pfam00505. It binds to the Armadillo repeats (pfam00514) in Catenin beta-1 (CTNNB1), which is involved in transcriptional regulation. It functions as a transactivating domain (TAD).	GO:0001525|angiogenesis;GO:0060070|canonical Wnt signaling pathway;GO:0060913|cardiac cell fate determination;GO:0003142|cardiogenic plate morphogenesis;GO:0042074|cell migration involved in gastrulation;GO:0061009|common bile duct development;GO:0048617|embryonic foregut morphogenesis;GO:0035050|embryonic heart tube development;GO:0003143|embryonic heart tube morphogenesis;GO:0048568|embryonic o…	GO:0044798|nuclear transcription factor complex;GO:0005634|nucleus;GO:0005667|transcription factor complex;	GO:0008013|beta-catenin binding;GO:0003677|DNA binding;GO:0046982|protein heterodimerization activity;GO:0000981|RNA polymerase II transcription factor activity, sequence-specific DNA binding;GO:0043565|sequence-specific DNA binding;GO:0003713|transcription coactivator activity;GO:0003705|transcription factor activity, RNA polymerase II distal enhancer sequence-specific binding;GO:0003700|transcr…	K04495	SOX17; transcription factor SOX17 (SOX group F)
chr1	4492099	4493768	1670	4493386	54	16.6985	3.79684	11.951	3_peak_1c	chr1	4491249	4492663	Exon	ENSMUSG00000025902	Sox17	gi|148682294|gb|EDL14241.1|	1753	0	SRY-box containing gene 17, isoform CRA_b, partial [Mus musculus]	gi|575501716|ref|NM_001289465.1|	3242	0	Mus musculus SRY (sex determining region Y)-box 17 (Sox17), transcript variant 3, mRNA	Q61473	308	1e-97	Transcription factor SOX-17	SPAC57A10.09c	54.7	9e-08	COG5648	pfam12067	Sox_C_TAD	Sox C-terminal transactivation domain. This domain is found at the C-terminus of the Sox family of transcription factors. It is found associated with pfam00505. It binds to the Armadillo repeats (pfam00514) in Catenin beta-1 (CTNNB1), which is involved in transcriptional regulation. It functions as a transactivating domain (TAD).	GO:0001525|angiogenesis;GO:0060070|canonical Wnt signaling pathway;GO:0060913|cardiac cell fate determination;GO:0003142|cardiogenic plate morphogenesis;GO:0042074|cell migration involved in gastrulation;GO:0061009|common bile duct development;GO:0048617|embryonic foregut morphogenesis;GO:0035050|embryonic heart tube development;GO:0003143|embryonic heart tube morphogenesis;GO:0048568|embryonic o…	GO:0044798|nuclear transcription factor complex;GO:0005634|nucleus;GO:0005667|transcription factor complex;	GO:0008013|beta-catenin binding;GO:0003677|DNA binding;GO:0046982|protein heterodimerization activity;GO:0000981|RNA polymerase II transcription factor activity, sequence-specific DNA binding;GO:0043565|sequence-specific DNA binding;GO:0003713|transcription coactivator activity;GO:0003705|transcription factor activity, RNA polymerase II distal enhancer sequence-specific binding;GO:0003700|transcr…	K04495	SOX17; transcription factor SOX17 (SOX group F)
chr1	4492099	4493768	1670	4493386	54	16.6985	3.79684	11.951	3_peak_1c	chr1	4491389	4492668	Exon	ENSMUSG00000025902	Sox17	gi|148682294|gb|EDL14241.1|	1753	0	SRY-box containing gene 17, isoform CRA_b, partial [Mus musculus]	gi|575501716|ref|NM_001289465.1|	3242	0	Mus musculus SRY (sex determining region Y)-box 17 (Sox17), transcript variant 3, mRNA	Q61473	308	1e-97	Transcription factor SOX-17	SPAC57A10.09c	54.7	9e-08	COG5648	pfam12067	Sox_C_TAD	Sox C-terminal transactivation domain. This domain is found at the C-terminus of the Sox family of transcription factors. It is found associated with pfam00505. It binds to the Armadillo repeats (pfam00514) in Catenin beta-1 (CTNNB1), which is involved in transcriptional regulation. It functions as a transactivating domain (TAD).	GO:0001525|angiogenesis;GO:0060070|canonical Wnt signaling pathway;GO:0060913|cardiac cell fate determination;GO:0003142|cardiogenic plate morphogenesis;GO:0042074|cell migration involved in gastrulation;GO:0061009|common bile duct development;GO:0048617|embryonic foregut morphogenesis;GO:0035050|embryonic heart tube development;GO:0003143|embryonic heart tube morphogenesis;GO:0048568|embryonic o…	GO:0044798|nuclear transcription factor complex;GO:0005634|nucleus;GO:0005667|transcription factor complex;	GO:0008013|beta-catenin binding;GO:0003677|DNA binding;GO:0046982|protein heterodimerization activity;GO:0000981|RNA polymerase II transcription factor activity, sequence-specific DNA binding;GO:0043565|sequence-specific DNA binding;GO:0003713|transcription coactivator activity;GO:0003705|transcription factor activity, RNA polymerase II distal enhancer sequence-specific binding;GO:0003700|transcr…	K04495	SOX17; transcription factor SOX17 (SOX group F)
chr1	4492099	4493768	1670	4493386	54	16.6985	3.79684	11.951	3_peak_1c	chr1	4491712	4492668	Exon	ENSMUSG00000025902	Sox17	gi|148682294|gb|EDL14241.1|	1753	0	SRY-box containing gene 17, isoform CRA_b, partial [Mus musculus]	gi|575501716|ref|NM_001289465.1|	3242	0	Mus musculus SRY (sex determining region Y)-box 17 (Sox17), transcript variant 3, mRNA	Q61473	308	1e-97	Transcription factor SOX-17	SPAC57A10.09c	54.7	9e-08	COG5648	pfam12067	Sox_C_TAD	Sox C-terminal transactivation domain. This domain is found at the C-terminus of the Sox family of transcription factors. It is found associated with pfam00505. It binds to the Armadillo repeats (pfam00514) in Catenin beta-1 (CTNNB1), which is involved in transcriptional regulation. It functions as a transactivating domain (TAD).	GO:0001525|angiogenesis;GO:0060070|canonical Wnt signaling pathway;GO:0060913|cardiac cell fate determination;GO:0003142|cardiogenic plate morphogenesis;GO:0042074|cell migration involved in gastrulation;GO:0061009|common bile duct development;GO:0048617|embryonic foregut morphogenesis;GO:0035050|embryonic heart tube development;GO:0003143|embryonic heart tube morphogenesis;GO:0048568|embryonic o…	GO:0044798|nuclear transcription factor complex;GO:0005634|nucleus;GO:0005667|transcription factor complex;	GO:0008013|beta-catenin binding;GO:0003677|DNA binding;GO:0046982|protein heterodimerization activity;GO:0000981|RNA polymerase II transcription factor activity, sequence-specific DNA binding;GO:0043565|sequence-specific DNA binding;GO:0003713|transcription coactivator activity;GO:0003705|transcription factor activity, RNA polymerase II distal enhancer sequence-specific binding;GO:0003700|transcr…	K04495	SOX17; transcription factor SOX17 (SOX group F)
chr1	4492099	4493768	1670	4493386	54	16.6985	3.79684	11.951	3_peak_1c	chr1	4492456	4493604	Exon	ENSMUSG00000025902	Sox17	gi|148682294|gb|EDL14241.1|	1753	0	SRY-box containing gene 17, isoform CRA_b, partial [Mus musculus]	gi|575501716|ref|NM_001289465.1|	3242	0	Mus musculus SRY (sex determining region Y)-box 17 (Sox17), transcript variant 3, mRNA	Q61473	308	1e-97	Transcription factor SOX-17	SPAC57A10.09c	54.7	9e-08	COG5648	pfam12067	Sox_C_TAD	Sox C-terminal transactivation domain. This domain is found at the C-terminus of the Sox family of transcription factors. It is found associated with pfam00505. It binds to the Armadillo repeats (pfam00514) in Catenin beta-1 (CTNNB1), which is involved in transcriptional regulation. It functions as a transactivating domain (TAD).	GO:0001525|angiogenesis;GO:0060070|canonical Wnt signaling pathway;GO:0060913|cardiac cell fate determination;GO:0003142|cardiogenic plate morphogenesis;GO:0042074|cell migration involved in gastrulation;GO:0061009|common bile duct development;GO:0048617|embryonic foregut morphogenesis;GO:0035050|embryonic heart tube development;GO:0003143|embryonic heart tube morphogenesis;GO:0048568|embryonic o…	GO:0044798|nuclear transcription factor complex;GO:0005634|nucleus;GO:0005667|transcription factor complex;	GO:0008013|beta-catenin binding;GO:0003677|DNA binding;GO:0046982|protein heterodimerization activity;GO:0000981|RNA polymerase II transcription factor activity, sequence-specific DNA binding;GO:0043565|sequence-specific DNA binding;GO:0003713|transcription coactivator activity;GO:0003705|transcription factor activity, RNA polymerase II distal enhancer sequence-specific binding;GO:0003700|transcr…	K04495	SOX17; transcription factor SOX17 (SOX group F)
chr1	4492099	4493768	1670	4493386	54	16.6985	3.79684	11.951	3_peak_1c	chr1	4492457	4492668	Exon	ENSMUSG00000025902	Sox17	gi|148682294|gb|EDL14241.1|	1753	0	SRY-box containing gene 17, isoform CRA_b, partial [Mus musculus]	gi|575501716|ref|NM_001289465.1|	3242	0	Mus musculus SRY (sex determining region Y)-box 17 (Sox17), transcript variant 3, mRNA	Q61473	308	1e-97	Transcription factor SOX-17	SPAC57A10.09c	54.7	9e-08	COG5648	pfam12067	Sox_C_TAD	Sox C-terminal transactivation domain. This domain is found at the C-terminus of the Sox family of transcription factors. It is found associated with pfam00505. It binds to the Armadillo repeats (pfam00514) in Catenin beta-1 (CTNNB1), which is involved in transcriptional regulation. It functions as a transactivating domain (TAD).	GO:0001525|angiogenesis;GO:0060070|canonical Wnt signaling pathway;GO:0060913|cardiac cell fate determination;GO:0003142|cardiogenic plate morphogenesis;GO:0042074|cell migration involved in gastrulation;GO:0061009|common bile duct development;GO:0048617|embryonic foregut morphogenesis;GO:0035050|embryonic heart tube development;GO:0003143|embryonic heart tube morphogenesis;GO:0048568|embryonic o…	GO:0044798|nuclear transcription factor complex;GO:0005634|nucleus;GO:0005667|transcription factor complex;	GO:0008013|beta-catenin binding;GO:0003677|DNA binding;GO:0046982|protein heterodimerization activity;GO:0000981|RNA polymerase II transcription factor activity, sequence-specific DNA binding;GO:0043565|sequence-specific DNA binding;GO:0003713|transcription coactivator activity;GO:0003705|transcription factor activity, RNA polymerase II distal enhancer sequence-specific binding;GO:0003700|transcr…	K04495	SOX17; transcription factor SOX17 (SOX group F)
chr1	4492099	4493768	1670	4493386	54	16.6985	3.79684	11.951	3_peak_1c	chr1	4492464	4492668	Exon	ENSMUSG00000025902	Sox17	gi|148682294|gb|EDL14241.1|	1753	0	SRY-box containing gene 17, isoform CRA_b, partial [Mus musculus]	gi|575501716|ref|NM_001289465.1|	3242	0	Mus musculus SRY (sex determining region Y)-box 17 (Sox17), transcript variant 3, mRNA	Q61473	308	1e-97	Transcription factor SOX-17	SPAC57A10.09c	54.7	9e-08	COG5648	pfam12067	Sox_C_TAD	Sox C-terminal transactivation domain. This domain is found at the C-terminus of the Sox family of transcription factors. It is found associated with pfam00505. It binds to the Armadillo repeats (pfam00514) in Catenin beta-1 (CTNNB1), which is involved in transcriptional regulation. It functions as a transactivating domain (TAD).	GO:0001525|angiogenesis;GO:0060070|canonical Wnt signaling pathway;GO:0060913|cardiac cell fate determination;GO:0003142|cardiogenic plate morphogenesis;GO:0042074|cell migration involved in gastrulation;GO:0061009|common bile duct development;GO:0048617|embryonic foregut morphogenesis;GO:0035050|embryonic heart tube development;GO:0003143|embryonic heart tube morphogenesis;GO:0048568|embryonic o…	GO:0044798|nuclear transcription factor complex;GO:0005634|nucleus;GO:0005667|transcription factor complex;	GO:0008013|beta-catenin binding;GO:0003677|DNA binding;GO:0046982|protein heterodimerization activity;GO:0000981|RNA polymerase II transcription factor activity, sequence-specific DNA binding;GO:0043565|sequence-specific DNA binding;GO:0003713|transcription coactivator activity;GO:0003705|transcription factor activity, RNA polymerase II distal enhancer sequence-specific binding;GO:0003700|transcr…	K04495	SOX17; transcription factor SOX17 (SOX group F)
chr1	4492099	4493768	1670	4493386	54	16.6985	3.79684	11.951	3_peak_1c	chr1	4492466	4492668	Exon	ENSMUSG00000025902	Sox17	gi|148682294|gb|EDL14241.1|	1753	0	SRY-box containing gene 17, isoform CRA_b, partial [Mus musculus]	gi|575501716|ref|NM_001289465.1|	3242	0	Mus musculus SRY (sex determining region Y)-box 17 (Sox17), transcript variant 3, mRNA	Q61473	308	1e-97	Transcription factor SOX-17	SPAC57A10.09c	54.7	9e-08	COG5648	pfam12067	Sox_C_TAD	Sox C-terminal transactivation domain. This domain is found at the C-terminus of the Sox family of transcription factors. It is found associated with pfam00505. It binds to the Armadillo repeats (pfam00514) in Catenin beta-1 (CTNNB1), which is involved in transcriptional regulation. It functions as a transactivating domain (TAD).	GO:0001525|angiogenesis;GO:0060070|canonical Wnt signaling pathway;GO:0060913|cardiac cell fate determination;GO:0003142|cardiogenic plate morphogenesis;GO:0042074|cell migration involved in gastrulation;GO:0061009|common bile duct development;GO:0048617|embryonic foregut morphogenesis;GO:0035050|embryonic heart tube development;GO:0003143|embryonic heart tube morphogenesis;GO:0048568|embryonic o…	GO:0044798|nuclear transcription factor complex;GO:0005634|nucleus;GO:0005667|transcription factor complex;	GO:0008013|beta-catenin binding;GO:0003677|DNA binding;GO:0046982|protein heterodimerization activity;GO:0000981|RNA polymerase II transcription factor activity, sequence-specific DNA binding;GO:0043565|sequence-specific DNA binding;GO:0003713|transcription coactivator activity;GO:0003705|transcription factor activity, RNA polymerase II distal enhancer sequence-specific binding;GO:0003700|transcr…	K04495	SOX17; transcription factor SOX17 (SOX group F)
chr1	4492099	4493768	1670	4493386	54	16.6985	3.79684	11.951	3_peak_1c	chr1	4493099	4493735	Exon	ENSMUSG00000025902	Sox17	gi|148682294|gb|EDL14241.1|	1753	0	SRY-box containing gene 17, isoform CRA_b, partial [Mus musculus]	gi|575501716|ref|NM_001289465.1|	3242	0	Mus musculus SRY (sex determining region Y)-box 17 (Sox17), transcript variant 3, mRNA	Q61473	308	1e-97	Transcription factor SOX-17	SPAC57A10.09c	54.7	9e-08	COG5648	pfam12067	Sox_C_TAD	Sox C-terminal transactivation domain. This domain is found at the C-terminus of the Sox family of transcription factors. It is found associated with pfam00505. It binds to the Armadillo repeats (pfam00514) in Catenin beta-1 (CTNNB1), which is involved in transcriptional regulation. It functions as a transactivating domain (TAD).	GO:0001525|angiogenesis;GO:0060070|canonical Wnt signaling pathway;GO:0060913|cardiac cell fate determination;GO:0003142|cardiogenic plate morphogenesis;GO:0042074|cell migration involved in gastrulation;GO:0061009|common bile duct development;GO:0048617|embryonic foregut morphogenesis;GO:0035050|embryonic heart tube development;GO:0003143|embryonic heart tube morphogenesis;GO:0048568|embryonic o…	GO:0044798|nuclear transcription factor complex;GO:0005634|nucleus;GO:0005667|transcription factor complex;	GO:0008013|beta-catenin binding;GO:0003677|DNA binding;GO:0046982|protein heterodimerization activity;GO:0000981|RNA polymerase II transcription factor activity, sequence-specific DNA binding;GO:0043565|sequence-specific DNA binding;GO:0003713|transcription coactivator activity;GO:0003705|transcription factor activity, RNA polymerase II distal enhancer sequence-specific binding;GO:0003700|transcr…	K04495	SOX17; transcription factor SOX17 (SOX group F)
chr1	4492099	4493768	1670	4493386	54	16.6985	3.79684	11.951	3_peak_1c	chr1	4493099	4493466	Exon	ENSMUSG00000025902	Sox17	gi|148682294|gb|EDL14241.1|	1753	0	SRY-box containing gene 17, isoform CRA_b, partial [Mus musculus]	gi|575501716|ref|NM_001289465.1|	3242	0	Mus musculus SRY (sex determining region Y)-box 17 (Sox17), transcript variant 3, mRNA	Q61473	308	1e-97	Transcription factor SOX-17	SPAC57A10.09c	54.7	9e-08	COG5648	pfam12067	Sox_C_TAD	Sox C-terminal transactivation domain. This domain is found at the C-terminus of the Sox family of transcription factors. It is found associated with pfam00505. It binds to the Armadillo repeats (pfam00514) in Catenin beta-1 (CTNNB1), which is involved in transcriptional regulation. It functions as a transactivating domain (TAD).	GO:0001525|angiogenesis;GO:0060070|canonical Wnt signaling pathway;GO:0060913|cardiac cell fate determination;GO:0003142|cardiogenic plate morphogenesis;GO:0042074|cell migration involved in gastrulation;GO:0061009|common bile duct development;GO:0048617|embryonic foregut morphogenesis;GO:0035050|embryonic heart tube development;GO:0003143|embryonic heart tube morphogenesis;GO:0048568|embryonic o…	GO:0044798|nuclear transcription factor complex;GO:0005634|nucleus;GO:0005667|transcription factor complex;	GO:0008013|beta-catenin binding;GO:0003677|DNA binding;GO:0046982|protein heterodimerization activity;GO:0000981|RNA polymerase II transcription factor activity, sequence-specific DNA binding;GO:0043565|sequence-specific DNA binding;GO:0003713|transcription coactivator activity;GO:0003705|transcription factor activity, RNA polymerase II distal enhancer sequence-specific binding;GO:0003700|transcr…	K04495	SOX17; transcription factor SOX17 (SOX group F)
chr1	4492099	4493768	1670	4493386	54	16.6985	3.79684	11.951	3_peak_1c	chr1	4493099	4493490	Exon	ENSMUSG00000025902	Sox17	gi|148682294|gb|EDL14241.1|	1753	0	SRY-box containing gene 17, isoform CRA_b, partial [Mus musculus]	gi|575501716|ref|NM_001289465.1|	3242	0	Mus musculus SRY (sex determining region Y)-box 17 (Sox17), transcript variant 3, mRNA	Q61473	308	1e-97	Transcription factor SOX-17	SPAC57A10.09c	54.7	9e-08	COG5648	pfam12067	Sox_C_TAD	Sox C-terminal transactivation domain. This domain is found at the C-terminus of the Sox family of transcription factors. It is found associated with pfam00505. It binds to the Armadillo repeats (pfam00514) in Catenin beta-1 (CTNNB1), which is involved in transcriptional regulation. It functions as a transactivating domain (TAD).	GO:0001525|angiogenesis;GO:0060070|canonical Wnt signaling pathway;GO:0060913|cardiac cell fate determination;GO:0003142|cardiogenic plate morphogenesis;GO:0042074|cell migration involved in gastrulation;GO:0061009|common bile duct development;GO:0048617|embryonic foregut morphogenesis;GO:0035050|embryonic heart tube development;GO:0003143|embryonic heart tube morphogenesis;GO:0048568|embryonic o…	GO:0044798|nuclear transcription factor complex;GO:0005634|nucleus;GO:0005667|transcription factor complex;	GO:0008013|beta-catenin binding;GO:0003677|DNA binding;GO:0046982|protein heterodimerization activity;GO:0000981|RNA polymerase II transcription factor activity, sequence-specific DNA binding;GO:0043565|sequence-specific DNA binding;GO:0003713|transcription coactivator activity;GO:0003705|transcription factor activity, RNA polymerase II distal enhancer sequence-specific binding;GO:0003700|transcr…	K04495	SOX17; transcription factor SOX17 (SOX group F)
chr1	4492099	4493768	1670	4493386	54	16.6985	3.79684	11.951	3_peak_1c	chr1	4493767	4493863	Exon	ENSMUSG00000025902	Sox17	gi|148682294|gb|EDL14241.1|	1753	0	SRY-box containing gene 17, isoform CRA_b, partial [Mus musculus]	gi|575501716|ref|NM_001289465.1|	3242	0	Mus musculus SRY (sex determining region Y)-box 17 (Sox17), transcript variant 3, mRNA	Q61473	308	1e-97	Transcription factor SOX-17	SPAC57A10.09c	54.7	9e-08	COG5648	pfam12067	Sox_C_TAD	Sox C-terminal transactivation domain. This domain is found at the C-terminus of the Sox family of transcription factors. It is found associated with pfam00505. It binds to the Armadillo repeats (pfam00514) in Catenin beta-1 (CTNNB1), which is involved in transcriptional regulation. It functions as a transactivating domain (TAD).	GO:0001525|angiogenesis;GO:0060070|canonical Wnt signaling pathway;GO:0060913|cardiac cell fate determination;GO:0003142|cardiogenic plate morphogenesis;GO:0042074|cell migration involved in gastrulation;GO:0061009|common bile duct development;GO:0048617|embryonic foregut morphogenesis;GO:0035050|embryonic heart tube development;GO:0003143|embryonic heart tube morphogenesis;GO:0048568|embryonic o…	GO:0044798|nuclear transcription factor complex;GO:0005634|nucleus;GO:0005667|transcription factor complex;	GO:0008013|beta-catenin binding;GO:0003677|DNA binding;GO:0046982|protein heterodimerization activity;GO:0000981|RNA polymerase II transcription factor activity, sequence-specific DNA binding;GO:0043565|sequence-specific DNA binding;GO:0003713|transcription coactivator activity;GO:0003705|transcription factor activity, RNA polymerase II distal enhancer sequence-specific binding;GO:0003700|transcr…	K04495	SOX17; transcription factor SOX17 (SOX group F)
chr1	4492099	4493768	1670	4493386	54	16.6985	3.79684	11.951	3_peak_1c	chr1	4492663	4493767	Intron	ENSMUSG00000025902	Sox17	gi|148682294|gb|EDL14241.1|	1753	0	SRY-box containing gene 17, isoform CRA_b, partial [Mus musculus]	gi|575501716|ref|NM_001289465.1|	3242	0	Mus musculus SRY (sex determining region Y)-box 17 (Sox17), transcript variant 3, mRNA	Q61473	308	1e-97	Transcription factor SOX-17	SPAC57A10.09c	54.7	9e-08	COG5648	pfam12067	Sox_C_TAD	Sox C-terminal transactivation domain. This domain is found at the C-terminus of the Sox family of transcription factors. It is found associated with pfam00505. It binds to the Armadillo repeats (pfam00514) in Catenin beta-1 (CTNNB1), which is involved in transcriptional regulation. It functions as a transactivating domain (TAD).	GO:0001525|angiogenesis;GO:0060070|canonical Wnt signaling pathway;GO:0060913|cardiac cell fate determination;GO:0003142|cardiogenic plate morphogenesis;GO:0042074|cell migration involved in gastrulation;GO:0061009|common bile duct development;GO:0048617|embryonic foregut morphogenesis;GO:0035050|embryonic heart tube development;GO:0003143|embryonic heart tube morphogenesis;GO:0048568|embryonic o…	GO:0044798|nuclear transcription factor complex;GO:0005634|nucleus;GO:0005667|transcription factor complex;	GO:0008013|beta-catenin binding;GO:0003677|DNA binding;GO:0046982|protein heterodimerization activity;GO:0000981|RNA polymerase II transcription factor activity, sequence-specific DNA binding;GO:0043565|sequence-specific DNA binding;GO:0003713|transcription coactivator activity;GO:0003705|transcription factor activity, RNA polymerase II distal enhancer sequence-specific binding;GO:0003700|transcr…	K04495	SOX17; transcription factor SOX17 (SOX group F)
chr1	4492099	4493768	1670	4493386	54	16.6985	3.79684	11.951	3_peak_1c	chr1	4492668	4493099	Intron	ENSMUSG00000025902	Sox17	gi|148682294|gb|EDL14241.1|	1753	0	SRY-box containing gene 17, isoform CRA_b, partial [Mus musculus]	gi|575501716|ref|NM_001289465.1|	3242	0	Mus musculus SRY (sex determining region Y)-box 17 (Sox17), transcript variant 3, mRNA	Q61473	308	1e-97	Transcription factor SOX-17	SPAC57A10.09c	54.7	9e-08	COG5648	pfam12067	Sox_C_TAD	Sox C-terminal transactivation domain. This domain is found at the C-terminus of the Sox family of transcription factors. It is found associated with pfam00505. It binds to the Armadillo repeats (pfam00514) in Catenin beta-1 (CTNNB1), which is involved in transcriptional regulation. It functions as a transactivating domain (TAD).	GO:0001525|angiogenesis;GO:0060070|canonical Wnt signaling pathway;GO:0060913|cardiac cell fate determination;GO:0003142|cardiogenic plate morphogenesis;GO:0042074|cell migration involved in gastrulation;GO:0061009|common bile duct development;GO:0048617|embryonic foregut morphogenesis;GO:0035050|embryonic heart tube development;GO:0003143|embryonic heart tube morphogenesis;GO:0048568|embryonic o…	GO:0044798|nuclear transcription factor complex;GO:0005634|nucleus;GO:0005667|transcription factor complex;	GO:0008013|beta-catenin binding;GO:0003677|DNA binding;GO:0046982|protein heterodimerization activity;GO:0000981|RNA polymerase II transcription factor activity, sequence-specific DNA binding;GO:0043565|sequence-specific DNA binding;GO:0003713|transcription coactivator activity;GO:0003705|transcription factor activity, RNA polymerase II distal enhancer sequence-specific binding;GO:0003700|transcr…	K04495	SOX17; transcription factor SOX17 (SOX group F)
chr1	4492099	4493768	1670	4493386	54	16.6985	3.79684	11.951	3_peak_1c	chr1	4492668	4493771	Intron	ENSMUSG00000025902	Sox17	gi|148682294|gb|EDL14241.1|	1753	0	SRY-box containing gene 17, isoform CRA_b, partial [Mus musculus]	gi|575501716|ref|NM_001289465.1|	3242	0	Mus musculus SRY (sex determining region Y)-box 17 (Sox17), transcript variant 3, mRNA	Q61473	308	1e-97	Transcription factor SOX-17	SPAC57A10.09c	54.7	9e-08	COG5648	pfam12067	Sox_C_TAD	Sox C-terminal transactivation domain. This domain is found at the C-terminus of the Sox family of transcription factors. It is found associated with pfam00505. It binds to the Armadillo repeats (pfam00514) in Catenin beta-1 (CTNNB1), which is involved in transcriptional regulation. It functions as a transactivating domain (TAD).	GO:0001525|angiogenesis;GO:0060070|canonical Wnt signaling pathway;GO:0060913|cardiac cell fate determination;GO:0003142|cardiogenic plate morphogenesis;GO:0042074|cell migration involved in gastrulation;GO:0061009|common bile duct development;GO:0048617|embryonic foregut morphogenesis;GO:0035050|embryonic heart tube development;GO:0003143|embryonic heart tube morphogenesis;GO:0048568|embryonic o…	GO:0044798|nuclear transcription factor complex;GO:0005634|nucleus;GO:0005667|transcription factor complex;	GO:0008013|beta-catenin binding;GO:0003677|DNA binding;GO:0046982|protein heterodimerization activity;GO:0000981|RNA polymerase II transcription factor activity, sequence-specific DNA binding;GO:0043565|sequence-specific DNA binding;GO:0003713|transcription coactivator activity;GO:0003705|transcription factor activity, RNA polymerase II distal enhancer sequence-specific binding;GO:0003700|transcr…	K04495	SOX17; transcription factor SOX17 (SOX group F)
chr1	4492099	4493768	1670	4493386	54	16.6985	3.79684	11.951	3_peak_1c	chr1	4493466	4493771	Intron	ENSMUSG00000025902	Sox17	gi|148682294|gb|EDL14241.1|	1753	0	SRY-box containing gene 17, isoform CRA_b, partial [Mus musculus]	gi|575501716|ref|NM_001289465.1|	3242	0	Mus musculus SRY (sex determining region Y)-box 17 (Sox17), transcript variant 3, mRNA	Q61473	308	1e-97	Transcription factor SOX-17	SPAC57A10.09c	54.7	9e-08	COG5648	pfam12067	Sox_C_TAD	Sox C-terminal transactivation domain. This domain is found at the C-terminus of the Sox family of transcription factors. It is found associated with pfam00505. It binds to the Armadillo repeats (pfam00514) in Catenin beta-1 (CTNNB1), which is involved in transcriptional regulation. It functions as a transactivating domain (TAD).	GO:0001525|angiogenesis;GO:0060070|canonical Wnt signaling pathway;GO:0060913|cardiac cell fate determination;GO:0003142|cardiogenic plate morphogenesis;GO:0042074|cell migration involved in gastrulation;GO:0061009|common bile duct development;GO:0048617|embryonic foregut morphogenesis;GO:0035050|embryonic heart tube development;GO:0003143|embryonic heart tube morphogenesis;GO:0048568|embryonic o…	GO:0044798|nuclear transcription factor complex;GO:0005634|nucleus;GO:0005667|transcription factor complex;	GO:0008013|beta-catenin binding;GO:0003677|DNA binding;GO:0046982|protein heterodimerization activity;GO:0000981|RNA polymerase II transcription factor activity, sequence-specific DNA binding;GO:0043565|sequence-specific DNA binding;GO:0003713|transcription coactivator activity;GO:0003705|transcription factor activity, RNA polymerase II distal enhancer sequence-specific binding;GO:0003700|transcr…	K04495	SOX17; transcription factor SOX17 (SOX group F)
chr1	4492099	4493768	1670	4493386	54	16.6985	3.79684	11.951	3_peak_1c	chr1	4493490	4493771	Intron	ENSMUSG00000025902	Sox17	gi|148682294|gb|EDL14241.1|	1753	0	SRY-box containing gene 17, isoform CRA_b, partial [Mus musculus]	gi|575501716|ref|NM_001289465.1|	3242	0	Mus musculus SRY (sex determining region Y)-box 17 (Sox17), transcript variant 3, mRNA	Q61473	308	1e-97	Transcription factor SOX-17	SPAC57A10.09c	54.7	9e-08	COG5648	pfam12067	Sox_C_TAD	Sox C-terminal transactivation domain. This domain is found at the C-terminus of the Sox family of transcription factors. It is found associated with pfam00505. It binds to the Armadillo repeats (pfam00514) in Catenin beta-1 (CTNNB1), which is involved in transcriptional regulation. It functions as a transactivating domain (TAD).	GO:0001525|angiogenesis;GO:0060070|canonical Wnt signaling pathway;GO:0060913|cardiac cell fate determination;GO:0003142|cardiogenic plate morphogenesis;GO:0042074|cell migration involved in gastrulation;GO:0061009|common bile duct development;GO:0048617|embryonic foregut morphogenesis;GO:0035050|embryonic heart tube development;GO:0003143|embryonic heart tube morphogenesis;GO:0048568|embryonic o…	GO:0044798|nuclear transcription factor complex;GO:0005634|nucleus;GO:0005667|transcription factor complex;	GO:0008013|beta-catenin binding;GO:0003677|DNA binding;GO:0046982|protein heterodimerization activity;GO:0000981|RNA polymerase II transcription factor activity, sequence-specific DNA binding;GO:0043565|sequence-specific DNA binding;GO:0003713|transcription coactivator activity;GO:0003705|transcription factor activity, RNA polymerase II distal enhancer sequence-specific binding;GO:0003700|transcr…	K04495	SOX17; transcription factor SOX17 (SOX group F)
chr1	4492099	4493768	1670	4493386	54	16.6985	3.79684	11.951	3_peak_1c	chr1	4493490	4495135	Intron	ENSMUSG00000025902	Sox17	gi|148682294|gb|EDL14241.1|	1753	0	SRY-box containing gene 17, isoform CRA_b, partial [Mus musculus]	gi|575501716|ref|NM_001289465.1|	3242	0	Mus musculus SRY (sex determining region Y)-box 17 (Sox17), transcript variant 3, mRNA	Q61473	308	1e-97	Transcription factor SOX-17	SPAC57A10.09c	54.7	9e-08	COG5648	pfam12067	Sox_C_TAD	Sox C-terminal transactivation domain. This domain is found at the C-terminus of the Sox family of transcription factors. It is found associated with pfam00505. It binds to the Armadillo repeats (pfam00514) in Catenin beta-1 (CTNNB1), which is involved in transcriptional regulation. It functions as a transactivating domain (TAD).	GO:0001525|angiogenesis;GO:0060070|canonical Wnt signaling pathway;GO:0060913|cardiac cell fate determination;GO:0003142|cardiogenic plate morphogenesis;GO:0042074|cell migration involved in gastrulation;GO:0061009|common bile duct development;GO:0048617|embryonic foregut morphogenesis;GO:0035050|embryonic heart tube development;GO:0003143|embryonic heart tube morphogenesis;GO:0048568|embryonic o…	GO:0044798|nuclear transcription factor complex;GO:0005634|nucleus;GO:0005667|transcription factor complex;	GO:0008013|beta-catenin binding;GO:0003677|DNA binding;GO:0046982|protein heterodimerization activity;GO:0000981|RNA polymerase II transcription factor activity, sequence-specific DNA binding;GO:0043565|sequence-specific DNA binding;GO:0003713|transcription coactivator activity;GO:0003705|transcription factor activity, RNA polymerase II distal enhancer sequence-specific binding;GO:0003700|transcr…	K04495	SOX17; transcription factor SOX17 (SOX group F)
chr1	4492099	4493768	1670	4493386	54	16.6985	3.79684	11.951	3_peak_1c	chr1	4493604	4495604	Upstream2k	ENSMUSG00000025902	Sox17	gi|148682294|gb|EDL14241.1|	1753	0	SRY-box containing gene 17, isoform CRA_b, partial [Mus musculus]	gi|575501716|ref|NM_001289465.1|	3242	0	Mus musculus SRY (sex determining region Y)-box 17 (Sox17), transcript variant 3, mRNA	Q61473	308	1e-97	Transcription factor SOX-17	SPAC57A10.09c	54.7	9e-08	COG5648	pfam12067	Sox_C_TAD	Sox C-terminal transactivation domain. This domain is found at the C-terminus of the Sox family of transcription factors. It is found associated with pfam00505. It binds to the Armadillo repeats (pfam00514) in Catenin beta-1 (CTNNB1), which is involved in transcriptional regulation. It functions as a transactivating domain (TAD).	GO:0001525|angiogenesis;GO:0060070|canonical Wnt signaling pathway;GO:0060913|cardiac cell fate determination;GO:0003142|cardiogenic plate morphogenesis;GO:0042074|cell migration involved in gastrulation;GO:0061009|common bile duct development;GO:0048617|embryonic foregut morphogenesis;GO:0035050|embryonic heart tube development;GO:0003143|embryonic heart tube morphogenesis;GO:0048568|embryonic o…	GO:0044798|nuclear transcription factor complex;GO:0005634|nucleus;GO:0005667|transcription factor complex;	GO:0008013|beta-catenin binding;GO:0003677|DNA binding;GO:0046982|protein heterodimerization activity;GO:0000981|RNA polymerase II transcription factor activity, sequence-specific DNA binding;GO:0043565|sequence-specific DNA binding;GO:0003713|transcription coactivator activity;GO:0003705|transcription factor activity, RNA polymerase II distal enhancer sequence-specific binding;GO:0003700|transcr…	K04495	SOX17; transcription factor SOX17 (SOX group F)
chr1	4492099	4493768	1670	4493386	54	16.6985	3.79684	11.951	3_peak_1c	chr1	4493735	4495735	Upstream2k	ENSMUSG00000025902	Sox17	gi|148682294|gb|EDL14241.1|	1753	0	SRY-box containing gene 17, isoform CRA_b, partial [Mus musculus]	gi|575501716|ref|NM_001289465.1|	3242	0	Mus musculus SRY (sex determining region Y)-box 17 (Sox17), transcript variant 3, mRNA	Q61473	308	1e-97	Transcription factor SOX-17	SPAC57A10.09c	54.7	9e-08	COG5648	pfam12067	Sox_C_TAD	Sox C-terminal transactivation domain. This domain is found at the C-terminus of the Sox family of transcription factors. It is found associated with pfam00505. It binds to the Armadillo repeats (pfam00514) in Catenin beta-1 (CTNNB1), which is involved in transcriptional regulation. It functions as a transactivating domain (TAD).	GO:0001525|angiogenesis;GO:0060070|canonical Wnt signaling pathway;GO:0060913|cardiac cell fate determination;GO:0003142|cardiogenic plate morphogenesis;GO:0042074|cell migration involved in gastrulation;GO:0061009|common bile duct development;GO:0048617|embryonic foregut morphogenesis;GO:0035050|embryonic heart tube development;GO:0003143|embryonic heart tube morphogenesis;GO:0048568|embryonic o…	GO:0044798|nuclear transcription factor complex;GO:0005634|nucleus;GO:0005667|transcription factor complex;	GO:0008013|beta-catenin binding;GO:0003677|DNA binding;GO:0046982|protein heterodimerization activity;GO:0000981|RNA polymerase II transcription factor activity, sequence-specific DNA binding;GO:0043565|sequence-specific DNA binding;GO:0003713|transcription coactivator activity;GO:0003705|transcription factor activity, RNA polymerase II distal enhancer sequence-specific binding;GO:0003700|transcr…	K04495	SOX17; transcription factor SOX17 (SOX group F)
chr1	4492099	4493768	1670	4493386	54	16.6985	3.79684	11.951	3_peak_1c	chr1	4492591	4492663	UTR5	ENSMUSG00000025902	Sox17	gi|148682294|gb|EDL14241.1|	1753	0	SRY-box containing gene 17, isoform CRA_b, partial [Mus musculus]	gi|575501716|ref|NM_001289465.1|	3242	0	Mus musculus SRY (sex determining region Y)-box 17 (Sox17), transcript variant 3, mRNA	Q61473	308	1e-97	Transcription factor SOX-17	SPAC57A10.09c	54.7	9e-08	COG5648	pfam12067	Sox_C_TAD	Sox C-terminal transactivation domain. This domain is found at the C-terminus of the Sox family of transcription factors. It is found associated with pfam00505. It binds to the Armadillo repeats (pfam00514) in Catenin beta-1 (CTNNB1), which is involved in transcriptional regulation. It functions as a transactivating domain (TAD).	GO:0001525|angiogenesis;GO:0060070|canonical Wnt signaling pathway;GO:0060913|cardiac cell fate determination;GO:0003142|cardiogenic plate morphogenesis;GO:0042074|cell migration involved in gastrulation;GO:0061009|common bile duct development;GO:0048617|embryonic foregut morphogenesis;GO:0035050|embryonic heart tube development;GO:0003143|embryonic heart tube morphogenesis;GO:0048568|embryonic o…	GO:0044798|nuclear transcription factor complex;GO:0005634|nucleus;GO:0005667|transcription factor complex;	GO:0008013|beta-catenin binding;GO:0003677|DNA binding;GO:0046982|protein heterodimerization activity;GO:0000981|RNA polymerase II transcription factor activity, sequence-specific DNA binding;GO:0043565|sequence-specific DNA binding;GO:0003713|transcription coactivator activity;GO:0003705|transcription factor activity, RNA polymerase II distal enhancer sequence-specific binding;GO:0003700|transcr…	K04495	SOX17; transcription factor SOX17 (SOX group F)
chr1	4492099	4493768	1670	4493386	54	16.6985	3.79684	11.951	3_peak_1c	chr1	4493406	4493466	UTR5	ENSMUSG00000025902	Sox17	gi|148682294|gb|EDL14241.1|	1753	0	SRY-box containing gene 17, isoform CRA_b, partial [Mus musculus]	gi|575501716|ref|NM_001289465.1|	3242	0	Mus musculus SRY (sex determining region Y)-box 17 (Sox17), transcript variant 3, mRNA	Q61473	308	1e-97	Transcription factor SOX-17	SPAC57A10.09c	54.7	9e-08	COG5648	pfam12067	Sox_C_TAD	Sox C-terminal transactivation domain. This domain is found at the C-terminus of the Sox family of transcription factors. It is found associated with pfam00505. It binds to the Armadillo repeats (pfam00514) in Catenin beta-1 (CTNNB1), which is involved in transcriptional regulation. It functions as a transactivating domain (TAD).	GO:0001525|angiogenesis;GO:0060070|canonical Wnt signaling pathway;GO:0060913|cardiac cell fate determination;GO:0003142|cardiogenic plate morphogenesis;GO:0042074|cell migration involved in gastrulation;GO:0061009|common bile duct development;GO:0048617|embryonic foregut morphogenesis;GO:0035050|embryonic heart tube development;GO:0003143|embryonic heart tube morphogenesis;GO:0048568|embryonic o…	GO:0044798|nuclear transcription factor complex;GO:0005634|nucleus;GO:0005667|transcription factor complex;	GO:0008013|beta-catenin binding;GO:0003677|DNA binding;GO:0046982|protein heterodimerization activity;GO:0000981|RNA polymerase II transcription factor activity, sequence-specific DNA binding;GO:0043565|sequence-specific DNA binding;GO:0003713|transcription coactivator activity;GO:0003705|transcription factor activity, RNA polymerase II distal enhancer sequence-specific binding;GO:0003700|transcr…	K04495	SOX17; transcription factor SOX17 (SOX group F)
chr1	4492099	4493768	1670	4493386	54	16.6985	3.79684	11.951	3_peak_1c	chr1	4493406	4493490	UTR5	ENSMUSG00000025902	Sox17	gi|148682294|gb|EDL14241.1|	1753	0	SRY-box containing gene 17, isoform CRA_b, partial [Mus musculus]	gi|575501716|ref|NM_001289465.1|	3242	0	Mus musculus SRY (sex determining region Y)-box 17 (Sox17), transcript variant 3, mRNA	Q61473	308	1e-97	Transcription factor SOX-17	SPAC57A10.09c	54.7	9e-08	COG5648	pfam12067	Sox_C_TAD	Sox C-terminal transactivation domain. This domain is found at the C-terminus of the Sox family of transcription factors. It is found associated with pfam00505. It binds to the Armadillo repeats (pfam00514) in Catenin beta-1 (CTNNB1), which is involved in transcriptional regulation. It functions as a transactivating domain (TAD).	GO:0001525|angiogenesis;GO:0060070|canonical Wnt signaling pathway;GO:0060913|cardiac cell fate determination;GO:0003142|cardiogenic plate morphogenesis;GO:0042074|cell migration involved in gastrulation;GO:0061009|common bile duct development;GO:0048617|embryonic foregut morphogenesis;GO:0035050|embryonic heart tube development;GO:0003143|embryonic heart tube morphogenesis;GO:0048568|embryonic o…	GO:0044798|nuclear transcription factor complex;GO:0005634|nucleus;GO:0005667|transcription factor complex;	GO:0008013|beta-catenin binding;GO:0003677|DNA binding;GO:0046982|protein heterodimerization activity;GO:0000981|RNA polymerase II transcription factor activity, sequence-specific DNA binding;GO:0043565|sequence-specific DNA binding;GO:0003713|transcription coactivator activity;GO:0003705|transcription factor activity, RNA polymerase II distal enhancer sequence-specific binding;GO:0003700|transcr…	K04495	SOX17; transcription factor SOX17 (SOX group F)
chr1	4492099	4493768	1670	4493386	54	16.6985	3.79684	11.951	3_peak_1c	chr1	4493406	4493735	UTR5	ENSMUSG00000025902	Sox17	gi|148682294|gb|EDL14241.1|	1753	0	SRY-box containing gene 17, isoform CRA_b, partial [Mus musculus]	gi|575501716|ref|NM_001289465.1|	3242	0	Mus musculus SRY (sex determining region Y)-box 17 (Sox17), transcript variant 3, mRNA	Q61473	308	1e-97	Transcription factor SOX-17	SPAC57A10.09c	54.7	9e-08	COG5648	pfam12067	Sox_C_TAD	Sox C-terminal transactivation domain. This domain is found at the C-terminus of the Sox family of transcription factors. It is found associated with pfam00505. It binds to the Armadillo repeats (pfam00514) in Catenin beta-1 (CTNNB1), which is involved in transcriptional regulation. It functions as a transactivating domain (TAD).	GO:0001525|angiogenesis;GO:0060070|canonical Wnt signaling pathway;GO:0060913|cardiac cell fate determination;GO:0003142|cardiogenic plate morphogenesis;GO:0042074|cell migration involved in gastrulation;GO:0061009|common bile duct development;GO:0048617|embryonic foregut morphogenesis;GO:0035050|embryonic heart tube development;GO:0003143|embryonic heart tube morphogenesis;GO:0048568|embryonic o…	GO:0044798|nuclear transcription factor complex;GO:0005634|nucleus;GO:0005667|transcription factor complex;	GO:0008013|beta-catenin binding;GO:0003677|DNA binding;GO:0046982|protein heterodimerization activity;GO:0000981|RNA polymerase II transcription factor activity, sequence-specific DNA binding;GO:0043565|sequence-specific DNA binding;GO:0003713|transcription coactivator activity;GO:0003705|transcription factor activity, RNA polymerase II distal enhancer sequence-specific binding;GO:0003700|transcr…	K04495	SOX17; transcription factor SOX17 (SOX group F)
chr1	4492099	4493768	1670	4493386	54	16.6985	3.79684	11.951	3_peak_1c	chr1	4493767	4493863	UTR5	ENSMUSG00000025902	Sox17	gi|148682294|gb|EDL14241.1|	1753	0	SRY-box containing gene 17, isoform CRA_b, partial [Mus musculus]	gi|575501716|ref|NM_001289465.1|	3242	0	Mus musculus SRY (sex determining region Y)-box 17 (Sox17), transcript variant 3, mRNA	Q61473	308	1e-97	Transcription factor SOX-17	SPAC57A10.09c	54.7	9e-08	COG5648	pfam12067	Sox_C_TAD	Sox C-terminal transactivation domain. This domain is found at the C-terminus of the Sox family of transcription factors. It is found associated with pfam00505. It binds to the Armadillo repeats (pfam00514) in Catenin beta-1 (CTNNB1), which is involved in transcriptional regulation. It functions as a transactivating domain (TAD).	GO:0001525|angiogenesis;GO:0060070|canonical Wnt signaling pathway;GO:0060913|cardiac cell fate determination;GO:0003142|cardiogenic plate morphogenesis;GO:0042074|cell migration involved in gastrulation;GO:0061009|common bile duct development;GO:0048617|embryonic foregut morphogenesis;GO:0035050|embryonic heart tube development;GO:0003143|embryonic heart tube morphogenesis;GO:0048568|embryonic o…	GO:0044798|nuclear transcription factor complex;GO:0005634|nucleus;GO:0005667|transcription factor complex;	GO:0008013|beta-catenin binding;GO:0003677|DNA binding;GO:0046982|protein heterodimerization activity;GO:0000981|RNA polymerase II transcription factor activity, sequence-specific DNA binding;GO:0043565|sequence-specific DNA binding;GO:0003713|transcription coactivator activity;GO:0003705|transcription factor activity, RNA polymerase II distal enhancer sequence-specific binding;GO:0003700|transcr…	K04495	SOX17; transcription factor SOX17 (SOX group F)
chr1	4492099	4493768	1670	4493035	45	11.7641	3.23508	7.42037	3_peak_1b	chr1	4490456	4492456	Downstream2k	ENSMUSG00000025902	Sox17	gi|148682294|gb|EDL14241.1|	1753	0	SRY-box containing gene 17, isoform CRA_b, partial [Mus musculus]	gi|575501716|ref|NM_001289465.1|	3242	0	Mus musculus SRY (sex determining region Y)-box 17 (Sox17), transcript variant 3, mRNA	Q61473	308	1e-97	Transcription factor SOX-17	SPAC57A10.09c	54.7	9e-08	COG5648	pfam12067	Sox_C_TAD	Sox C-terminal transactivation domain. This domain is found at the C-terminus of the Sox family of transcription factors. It is found associated with pfam00505. It binds to the Armadillo repeats (pfam00514) in Catenin beta-1 (CTNNB1), which is involved in transcriptional regulation. It functions as a transactivating domain (TAD).	GO:0001525|angiogenesis;GO:0060070|canonical Wnt signaling pathway;GO:0060913|cardiac cell fate determination;GO:0003142|cardiogenic plate morphogenesis;GO:0042074|cell migration involved in gastrulation;GO:0061009|common bile duct development;GO:0048617|embryonic foregut morphogenesis;GO:0035050|embryonic heart tube development;GO:0003143|embryonic heart tube morphogenesis;GO:0048568|embryonic o…	GO:0044798|nuclear transcription factor complex;GO:0005634|nucleus;GO:0005667|transcription factor complex;	GO:0008013|beta-catenin binding;GO:0003677|DNA binding;GO:0046982|protein heterodimerization activity;GO:0000981|RNA polymerase II transcription factor activity, sequence-specific DNA binding;GO:0043565|sequence-specific DNA binding;GO:0003713|transcription coactivator activity;GO:0003705|transcription factor activity, RNA polymerase II distal enhancer sequence-specific binding;GO:0003700|transcr…	K04495	SOX17; transcription factor SOX17 (SOX group F)
chr1	4492099	4493768	1670	4493035	45	11.7641	3.23508	7.42037	3_peak_1b	chr1	4490457	4492457	Downstream2k	ENSMUSG00000025902	Sox17	gi|148682294|gb|EDL14241.1|	1753	0	SRY-box containing gene 17, isoform CRA_b, partial [Mus musculus]	gi|575501716|ref|NM_001289465.1|	3242	0	Mus musculus SRY (sex determining region Y)-box 17 (Sox17), transcript variant 3, mRNA	Q61473	308	1e-97	Transcription factor SOX-17	SPAC57A10.09c	54.7	9e-08	COG5648	pfam12067	Sox_C_TAD	Sox C-terminal transactivation domain. This domain is found at the C-terminus of the Sox family of transcription factors. It is found associated with pfam00505. It binds to the Armadillo repeats (pfam00514) in Catenin beta-1 (CTNNB1), which is involved in transcriptional regulation. It functions as a transactivating domain (TAD).	GO:0001525|angiogenesis;GO:0060070|canonical Wnt signaling pathway;GO:0060913|cardiac cell fate determination;GO:0003142|cardiogenic plate morphogenesis;GO:0042074|cell migration involved in gastrulation;GO:0061009|common bile duct development;GO:0048617|embryonic foregut morphogenesis;GO:0035050|embryonic heart tube development;GO:0003143|embryonic heart tube morphogenesis;GO:0048568|embryonic o…	GO:0044798|nuclear transcription factor complex;GO:0005634|nucleus;GO:0005667|transcription factor complex;	GO:0008013|beta-catenin binding;GO:0003677|DNA binding;GO:0046982|protein heterodimerization activity;GO:0000981|RNA polymerase II transcription factor activity, sequence-specific DNA binding;GO:0043565|sequence-specific DNA binding;GO:0003713|transcription coactivator activity;GO:0003705|transcription factor activity, RNA polymerase II distal enhancer sequence-specific binding;GO:0003700|transcr…	K04495	SOX17; transcription factor SOX17 (SOX group F)
chr1	4492099	4493768	1670	4493035	45	11.7641	3.23508	7.42037	3_peak_1b	chr1	4490464	4492464	Downstream2k	ENSMUSG00000025902	Sox17	gi|148682294|gb|EDL14241.1|	1753	0	SRY-box containing gene 17, isoform CRA_b, partial [Mus musculus]	gi|575501716|ref|NM_001289465.1|	3242	0	Mus musculus SRY (sex determining region Y)-box 17 (Sox17), transcript variant 3, mRNA	Q61473	308	1e-97	Transcription factor SOX-17	SPAC57A10.09c	54.7	9e-08	COG5648	pfam12067	Sox_C_TAD	Sox C-terminal transactivation domain. This domain is found at the C-terminus of the Sox family of transcription factors. It is found associated with pfam00505. It binds to the Armadillo repeats (pfam00514) in Catenin beta-1 (CTNNB1), which is involved in transcriptional regulation. It functions as a transactivating domain (TAD).	GO:0001525|angiogenesis;GO:0060070|canonical Wnt signaling pathway;GO:0060913|cardiac cell fate determination;GO:0003142|cardiogenic plate morphogenesis;GO:0042074|cell migration involved in gastrulation;GO:0061009|common bile duct development;GO:0048617|embryonic foregut morphogenesis;GO:0035050|embryonic heart tube development;GO:0003143|embryonic heart tube morphogenesis;GO:0048568|embryonic o…	GO:0044798|nuclear transcription factor complex;GO:0005634|nucleus;GO:0005667|transcription factor complex;	GO:0008013|beta-catenin binding;GO:0003677|DNA binding;GO:0046982|protein heterodimerization activity;GO:0000981|RNA polymerase II transcription factor activity, sequence-specific DNA binding;GO:0043565|sequence-specific DNA binding;GO:0003713|transcription coactivator activity;GO:0003705|transcription factor activity, RNA polymerase II distal enhancer sequence-specific binding;GO:0003700|transcr…	K04495	SOX17; transcription factor SOX17 (SOX group F)
chr1	4492099	4493768	1670	4493035	45	11.7641	3.23508	7.42037	3_peak_1b	chr1	4490466	4492466	Downstream2k	ENSMUSG00000025902	Sox17	gi|148682294|gb|EDL14241.1|	1753	0	SRY-box containing gene 17, isoform CRA_b, partial [Mus musculus]	gi|575501716|ref|NM_001289465.1|	3242	0	Mus musculus SRY (sex determining region Y)-box 17 (Sox17), transcript variant 3, mRNA	Q61473	308	1e-97	Transcription factor SOX-17	SPAC57A10.09c	54.7	9e-08	COG5648	pfam12067	Sox_C_TAD	Sox C-terminal transactivation domain. This domain is found at the C-terminus of the Sox family of transcription factors. It is found associated with pfam00505. It binds to the Armadillo repeats (pfam00514) in Catenin beta-1 (CTNNB1), which is involved in transcriptional regulation. It functions as a transactivating domain (TAD).	GO:0001525|angiogenesis;GO:0060070|canonical Wnt signaling pathway;GO:0060913|cardiac cell fate determination;GO:0003142|cardiogenic plate morphogenesis;GO:0042074|cell migration involved in gastrulation;GO:0061009|common bile duct development;GO:0048617|embryonic foregut morphogenesis;GO:0035050|embryonic heart tube development;GO:0003143|embryonic heart tube morphogenesis;GO:0048568|embryonic o…	GO:0044798|nuclear transcription factor complex;GO:0005634|nucleus;GO:0005667|transcription factor complex;	GO:0008013|beta-catenin binding;GO:0003677|DNA binding;GO:0046982|protein heterodimerization activity;GO:0000981|RNA polymerase II transcription factor activity, sequence-specific DNA binding;GO:0043565|sequence-specific DNA binding;GO:0003713|transcription coactivator activity;GO:0003705|transcription factor activity, RNA polymerase II distal enhancer sequence-specific binding;GO:0003700|transcr…	K04495	SOX17; transcription factor SOX17 (SOX group F)
chr1	4492099	4493768	1670	4493035	45	11.7641	3.23508	7.42037	3_peak_1b	chr1	4490930	4492668	Exon	ENSMUSG00000025902	Sox17	gi|148682294|gb|EDL14241.1|	1753	0	SRY-box containing gene 17, isoform CRA_b, partial [Mus musculus]	gi|575501716|ref|NM_001289465.1|	3242	0	Mus musculus SRY (sex determining region Y)-box 17 (Sox17), transcript variant 3, mRNA	Q61473	308	1e-97	Transcription factor SOX-17	SPAC57A10.09c	54.7	9e-08	COG5648	pfam12067	Sox_C_TAD	Sox C-terminal transactivation domain. This domain is found at the C-terminus of the Sox family of transcription factors. It is found associated with pfam00505. It binds to the Armadillo repeats (pfam00514) in Catenin beta-1 (CTNNB1), which is involved in transcriptional regulation. It functions as a transactivating domain (TAD).	GO:0001525|angiogenesis;GO:0060070|canonical Wnt signaling pathway;GO:0060913|cardiac cell fate determination;GO:0003142|cardiogenic plate morphogenesis;GO:0042074|cell migration involved in gastrulation;GO:0061009|common bile duct development;GO:0048617|embryonic foregut morphogenesis;GO:0035050|embryonic heart tube development;GO:0003143|embryonic heart tube morphogenesis;GO:0048568|embryonic o…	GO:0044798|nuclear transcription factor complex;GO:0005634|nucleus;GO:0005667|transcription factor complex;	GO:0008013|beta-catenin binding;GO:0003677|DNA binding;GO:0046982|protein heterodimerization activity;GO:0000981|RNA polymerase II transcription factor activity, sequence-specific DNA binding;GO:0043565|sequence-specific DNA binding;GO:0003713|transcription coactivator activity;GO:0003705|transcription factor activity, RNA polymerase II distal enhancer sequence-specific binding;GO:0003700|transcr…	K04495	SOX17; transcription factor SOX17 (SOX group F)
chr1	4492099	4493768	1670	4493035	45	11.7641	3.23508	7.42037	3_peak_1b	chr1	4491249	4492663	Exon	ENSMUSG00000025902	Sox17	gi|148682294|gb|EDL14241.1|	1753	0	SRY-box containing gene 17, isoform CRA_b, partial [Mus musculus]	gi|575501716|ref|NM_001289465.1|	3242	0	Mus musculus SRY (sex determining region Y)-box 17 (Sox17), transcript variant 3, mRNA	Q61473	308	1e-97	Transcription factor SOX-17	SPAC57A10.09c	54.7	9e-08	COG5648	pfam12067	Sox_C_TAD	Sox C-terminal transactivation domain. This domain is found at the C-terminus of the Sox family of transcription factors. It is found associated with pfam00505. It binds to the Armadillo repeats (pfam00514) in Catenin beta-1 (CTNNB1), which is involved in transcriptional regulation. It functions as a transactivating domain (TAD).	GO:0001525|angiogenesis;GO:0060070|canonical Wnt signaling pathway;GO:0060913|cardiac cell fate determination;GO:0003142|cardiogenic plate morphogenesis;GO:0042074|cell migration involved in gastrulation;GO:0061009|common bile duct development;GO:0048617|embryonic foregut morphogenesis;GO:0035050|embryonic heart tube development;GO:0003143|embryonic heart tube morphogenesis;GO:0048568|embryonic o…	GO:0044798|nuclear transcription factor complex;GO:0005634|nucleus;GO:0005667|transcription factor complex;	GO:0008013|beta-catenin binding;GO:0003677|DNA binding;GO:0046982|protein heterodimerization activity;GO:0000981|RNA polymerase II transcription factor activity, sequence-specific DNA binding;GO:0043565|sequence-specific DNA binding;GO:0003713|transcription coactivator activity;GO:0003705|transcription factor activity, RNA polymerase II distal enhancer sequence-specific binding;GO:0003700|transcr…	K04495	SOX17; transcription factor SOX17 (SOX group F)
chr1	4492099	4493768	1670	4493035	45	11.7641	3.23508	7.42037	3_peak_1b	chr1	4491389	4492668	Exon	ENSMUSG00000025902	Sox17	gi|148682294|gb|EDL14241.1|	1753	0	SRY-box containing gene 17, isoform CRA_b, partial [Mus musculus]	gi|575501716|ref|NM_001289465.1|	3242	0	Mus musculus SRY (sex determining region Y)-box 17 (Sox17), transcript variant 3, mRNA	Q61473	308	1e-97	Transcription factor SOX-17	SPAC57A10.09c	54.7	9e-08	COG5648	pfam12067	Sox_C_TAD	Sox C-terminal transactivation domain. This domain is found at the C-terminus of the Sox family of transcription factors. It is found associated with pfam00505. It binds to the Armadillo repeats (pfam00514) in Catenin beta-1 (CTNNB1), which is involved in transcriptional regulation. It functions as a transactivating domain (TAD).	GO:0001525|angiogenesis;GO:0060070|canonical Wnt signaling pathway;GO:0060913|cardiac cell fate determination;GO:0003142|cardiogenic plate morphogenesis;GO:0042074|cell migration involved in gastrulation;GO:0061009|common bile duct development;GO:0048617|embryonic foregut morphogenesis;GO:0035050|embryonic heart tube development;GO:0003143|embryonic heart tube morphogenesis;GO:0048568|embryonic o…	GO:0044798|nuclear transcription factor complex;GO:0005634|nucleus;GO:0005667|transcription factor complex;	GO:0008013|beta-catenin binding;GO:0003677|DNA binding;GO:0046982|protein heterodimerization activity;GO:0000981|RNA polymerase II transcription factor activity, sequence-specific DNA binding;GO:0043565|sequence-specific DNA binding;GO:0003713|transcription coactivator activity;GO:0003705|transcription factor activity, RNA polymerase II distal enhancer sequence-specific binding;GO:0003700|transcr…	K04495	SOX17; transcription factor SOX17 (SOX group F)
chr1	4492099	4493768	1670	4493035	45	11.7641	3.23508	7.42037	3_peak_1b	chr1	4491712	4492668	Exon	ENSMUSG00000025902	Sox17	gi|148682294|gb|EDL14241.1|	1753	0	SRY-box containing gene 17, isoform CRA_b, partial [Mus musculus]	gi|575501716|ref|NM_001289465.1|	3242	0	Mus musculus SRY (sex determining region Y)-box 17 (Sox17), transcript variant 3, mRNA	Q61473	308	1e-97	Transcription factor SOX-17	SPAC57A10.09c	54.7	9e-08	COG5648	pfam12067	Sox_C_TAD	Sox C-terminal transactivation domain. This domain is found at the C-terminus of the Sox family of transcription factors. It is found associated with pfam00505. It binds to the Armadillo repeats (pfam00514) in Catenin beta-1 (CTNNB1), which is involved in transcriptional regulation. It functions as a transactivating domain (TAD).	GO:0001525|angiogenesis;GO:0060070|canonical Wnt signaling pathway;GO:0060913|cardiac cell fate determination;GO:0003142|cardiogenic plate morphogenesis;GO:0042074|cell migration involved in gastrulation;GO:0061009|common bile duct development;GO:0048617|embryonic foregut morphogenesis;GO:0035050|embryonic heart tube development;GO:0003143|embryonic heart tube morphogenesis;GO:0048568|embryonic o…	GO:0044798|nuclear transcription factor complex;GO:0005634|nucleus;GO:0005667|transcription factor complex;	GO:0008013|beta-catenin binding;GO:0003677|DNA binding;GO:0046982|protein heterodimerization activity;GO:0000981|RNA polymerase II transcription factor activity, sequence-specific DNA binding;GO:0043565|sequence-specific DNA binding;GO:0003713|transcription coactivator activity;GO:0003705|transcription factor activity, RNA polymerase II distal enhancer sequence-specific binding;GO:0003700|transcr…	K04495	SOX17; transcription factor SOX17 (SOX group F)
chr1	4492099	4493768	1670	4493035	45	11.7641	3.23508	7.42037	3_peak_1b	chr1	4492456	4493604	Exon	ENSMUSG00000025902	Sox17	gi|148682294|gb|EDL14241.1|	1753	0	SRY-box containing gene 17, isoform CRA_b, partial [Mus musculus]	gi|575501716|ref|NM_001289465.1|	3242	0	Mus musculus SRY (sex determining region Y)-box 17 (Sox17), transcript variant 3, mRNA	Q61473	308	1e-97	Transcription factor SOX-17	SPAC57A10.09c	54.7	9e-08	COG5648	pfam12067	Sox_C_TAD	Sox C-terminal transactivation domain. This domain is found at the C-terminus of the Sox family of transcription factors. It is found associated with pfam00505. It binds to the Armadillo repeats (pfam00514) in Catenin beta-1 (CTNNB1), which is involved in transcriptional regulation. It functions as a transactivating domain (TAD).	GO:0001525|angiogenesis;GO:0060070|canonical Wnt signaling pathway;GO:0060913|cardiac cell fate determination;GO:0003142|cardiogenic plate morphogenesis;GO:0042074|cell migration involved in gastrulation;GO:0061009|common bile duct development;GO:0048617|embryonic foregut morphogenesis;GO:0035050|embryonic heart tube development;GO:0003143|embryonic heart tube morphogenesis;GO:0048568|embryonic o…	GO:0044798|nuclear transcription factor complex;GO:0005634|nucleus;GO:0005667|transcription factor complex;	GO:0008013|beta-catenin binding;GO:0003677|DNA binding;GO:0046982|protein heterodimerization activity;GO:0000981|RNA polymerase II transcription factor activity, sequence-specific DNA binding;GO:0043565|sequence-specific DNA binding;GO:0003713|transcription coactivator activity;GO:0003705|transcription factor activity, RNA polymerase II distal enhancer sequence-specific binding;GO:0003700|transcr…	K04495	SOX17; transcription factor SOX17 (SOX group F)
chr1	4492099	4493768	1670	4493035	45	11.7641	3.23508	7.42037	3_peak_1b	chr1	4492457	4492668	Exon	ENSMUSG00000025902	Sox17	gi|148682294|gb|EDL14241.1|	1753	0	SRY-box containing gene 17, isoform CRA_b, partial [Mus musculus]	gi|575501716|ref|NM_001289465.1|	3242	0	Mus musculus SRY (sex determining region Y)-box 17 (Sox17), transcript variant 3, mRNA	Q61473	308	1e-97	Transcription factor SOX-17	SPAC57A10.09c	54.7	9e-08	COG5648	pfam12067	Sox_C_TAD	Sox C-terminal transactivation domain. This domain is found at the C-terminus of the Sox family of transcription factors. It is found associated with pfam00505. It binds to the Armadillo repeats (pfam00514) in Catenin beta-1 (CTNNB1), which is involved in transcriptional regulation. It functions as a transactivating domain (TAD).	GO:0001525|angiogenesis;GO:0060070|canonical Wnt signaling pathway;GO:0060913|cardiac cell fate determination;GO:0003142|cardiogenic plate morphogenesis;GO:0042074|cell migration involved in gastrulation;GO:0061009|common bile duct development;GO:0048617|embryonic foregut morphogenesis;GO:0035050|embryonic heart tube development;GO:0003143|embryonic heart tube morphogenesis;GO:0048568|embryonic o…	GO:0044798|nuclear transcription factor complex;GO:0005634|nucleus;GO:0005667|transcription factor complex;	GO:0008013|beta-catenin binding;GO:0003677|DNA binding;GO:0046982|protein heterodimerization activity;GO:0000981|RNA polymerase II transcription factor activity, sequence-specific DNA binding;GO:0043565|sequence-specific DNA binding;GO:0003713|transcription coactivator activity;GO:0003705|transcription factor activity, RNA polymerase II distal enhancer sequence-specific binding;GO:0003700|transcr…	K04495	SOX17; transcription factor SOX17 (SOX group F)
chr1	4492099	4493768	1670	4493035	45	11.7641	3.23508	7.42037	3_peak_1b	chr1	4492464	4492668	Exon	ENSMUSG00000025902	Sox17	gi|148682294|gb|EDL14241.1|	1753	0	SRY-box containing gene 17, isoform CRA_b, partial [Mus musculus]	gi|575501716|ref|NM_001289465.1|	3242	0	Mus musculus SRY (sex determining region Y)-box 17 (Sox17), transcript variant 3, mRNA	Q61473	308	1e-97	Transcription factor SOX-17	SPAC57A10.09c	54.7	9e-08	COG5648	pfam12067	Sox_C_TAD	Sox C-terminal transactivation domain. This domain is found at the C-terminus of the Sox family of transcription factors. It is found associated with pfam00505. It binds to the Armadillo repeats (pfam00514) in Catenin beta-1 (CTNNB1), which is involved in transcriptional regulation. It functions as a transactivating domain (TAD).	GO:0001525|angiogenesis;GO:0060070|canonical Wnt signaling pathway;GO:0060913|cardiac cell fate determination;GO:0003142|cardiogenic plate morphogenesis;GO:0042074|cell migration involved in gastrulation;GO:0061009|common bile duct development;GO:0048617|embryonic foregut morphogenesis;GO:0035050|embryonic heart tube development;GO:0003143|embryonic heart tube morphogenesis;GO:0048568|embryonic o…	GO:0044798|nuclear transcription factor complex;GO:0005634|nucleus;GO:0005667|transcription factor complex;	GO:0008013|beta-catenin binding;GO:0003677|DNA binding;GO:0046982|protein heterodimerization activity;GO:0000981|RNA polymerase II transcription factor activity, sequence-specific DNA binding;GO:0043565|sequence-specific DNA binding;GO:0003713|transcription coactivator activity;GO:0003705|transcription factor activity, RNA polymerase II distal enhancer sequence-specific binding;GO:0003700|transcr…	K04495	SOX17; transcription factor SOX17 (SOX group F)
chr1	4492099	4493768	1670	4493035	45	11.7641	3.23508	7.42037	3_peak_1b	chr1	4492466	4492668	Exon	ENSMUSG00000025902	Sox17	gi|148682294|gb|EDL14241.1|	1753	0	SRY-box containing gene 17, isoform CRA_b, partial [Mus musculus]	gi|575501716|ref|NM_001289465.1|	3242	0	Mus musculus SRY (sex determining region Y)-box 17 (Sox17), transcript variant 3, mRNA	Q61473	308	1e-97	Transcription factor SOX-17	SPAC57A10.09c	54.7	9e-08	COG5648	pfam12067	Sox_C_TAD	Sox C-terminal transactivation domain. This domain is found at the C-terminus of the Sox family of transcription factors. It is found associated with pfam00505. It binds to the Armadillo repeats (pfam00514) in Catenin beta-1 (CTNNB1), which is involved in transcriptional regulation. It functions as a transactivating domain (TAD).	GO:0001525|angiogenesis;GO:0060070|canonical Wnt signaling pathway;GO:0060913|cardiac cell fate determination;GO:0003142|cardiogenic plate morphogenesis;GO:0042074|cell migration involved in gastrulation;GO:0061009|common bile duct development;GO:0048617|embryonic foregut morphogenesis;GO:0035050|embryonic heart tube development;GO:0003143|embryonic heart tube morphogenesis;GO:0048568|embryonic o…	GO:0044798|nuclear transcription factor complex;GO:0005634|nucleus;GO:0005667|transcription factor complex;	GO:0008013|beta-catenin binding;GO:0003677|DNA binding;GO:0046982|protein heterodimerization activity;GO:0000981|RNA polymerase II transcription factor activity, sequence-specific DNA binding;GO:0043565|sequence-specific DNA binding;GO:0003713|transcription coactivator activity;GO:0003705|transcription factor activity, RNA polymerase II distal enhancer sequence-specific binding;GO:0003700|transcr…	K04495	SOX17; transcription factor SOX17 (SOX group F)
chr1	4492099	4493768	1670	4493035	45	11.7641	3.23508	7.42037	3_peak_1b	chr1	4493099	4493735	Exon	ENSMUSG00000025902	Sox17	gi|148682294|gb|EDL14241.1|	1753	0	SRY-box containing gene 17, isoform CRA_b, partial [Mus musculus]	gi|575501716|ref|NM_001289465.1|	3242	0	Mus musculus SRY (sex determining region Y)-box 17 (Sox17), transcript variant 3, mRNA	Q61473	308	1e-97	Transcription factor SOX-17	SPAC57A10.09c	54.7	9e-08	COG5648	pfam12067	Sox_C_TAD	Sox C-terminal transactivation domain. This domain is found at the C-terminus of the Sox family of transcription factors. It is found associated with pfam00505. It binds to the Armadillo repeats (pfam00514) in Catenin beta-1 (CTNNB1), which is involved in transcriptional regulation. It functions as a transactivating domain (TAD).	GO:0001525|angiogenesis;GO:0060070|canonical Wnt signaling pathway;GO:0060913|cardiac cell fate determination;GO:0003142|cardiogenic plate morphogenesis;GO:0042074|cell migration involved in gastrulation;GO:0061009|common bile duct development;GO:0048617|embryonic foregut morphogenesis;GO:0035050|embryonic heart tube development;GO:0003143|embryonic heart tube morphogenesis;GO:0048568|embryonic o…	GO:0044798|nuclear transcription factor complex;GO:0005634|nucleus;GO:0005667|transcription factor complex;	GO:0008013|beta-catenin binding;GO:0003677|DNA binding;GO:0046982|protein heterodimerization activity;GO:0000981|RNA polymerase II transcription factor activity, sequence-specific DNA binding;GO:0043565|sequence-specific DNA binding;GO:0003713|transcription coactivator activity;GO:0003705|transcription factor activity, RNA polymerase II distal enhancer sequence-specific binding;GO:0003700|transcr…	K04495	SOX17; transcription factor SOX17 (SOX group F)
chr1	4492099	4493768	1670	4493035	45	11.7641	3.23508	7.42037	3_peak_1b	chr1	4493099	4493466	Exon	ENSMUSG00000025902	Sox17	gi|148682294|gb|EDL14241.1|	1753	0	SRY-box containing gene 17, isoform CRA_b, partial [Mus musculus]	gi|575501716|ref|NM_001289465.1|	3242	0	Mus musculus SRY (sex determining region Y)-box 17 (Sox17), transcript variant 3, mRNA	Q61473	308	1e-97	Transcription factor SOX-17	SPAC57A10.09c	54.7	9e-08	COG5648	pfam12067	Sox_C_TAD	Sox C-terminal transactivation domain. This domain is found at the C-terminus of the Sox family of transcription factors. It is found associated with pfam00505. It binds to the Armadillo repeats (pfam00514) in Catenin beta-1 (CTNNB1), which is involved in transcriptional regulation. It functions as a transactivating domain (TAD).	GO:0001525|angiogenesis;GO:0060070|canonical Wnt signaling pathway;GO:0060913|cardiac cell fate determination;GO:0003142|cardiogenic plate morphogenesis;GO:0042074|cell migration involved in gastrulation;GO:0061009|common bile duct development;GO:0048617|embryonic foregut morphogenesis;GO:0035050|embryonic heart tube development;GO:0003143|embryonic heart tube morphogenesis;GO:0048568|embryonic o…	GO:0044798|nuclear transcription factor complex;GO:0005634|nucleus;GO:0005667|transcription factor complex;	GO:0008013|beta-catenin binding;GO:0003677|DNA binding;GO:0046982|protein heterodimerization activity;GO:0000981|RNA polymerase II transcription factor activity, sequence-specific DNA binding;GO:0043565|sequence-specific DNA binding;GO:0003713|transcription coactivator activity;GO:0003705|transcription factor activity, RNA polymerase II distal enhancer sequence-specific binding;GO:0003700|transcr…	K04495	SOX17; transcription factor SOX17 (SOX group F)
chr1	4492099	4493768	1670	4493035	45	11.7641	3.23508	7.42037	3_peak_1b	chr1	4493099	4493490	Exon	ENSMUSG00000025902	Sox17	gi|148682294|gb|EDL14241.1|	1753	0	SRY-box containing gene 17, isoform CRA_b, partial [Mus musculus]	gi|575501716|ref|NM_001289465.1|	3242	0	Mus musculus SRY (sex determining region Y)-box 17 (Sox17), transcript variant 3, mRNA	Q61473	308	1e-97	Transcription factor SOX-17	SPAC57A10.09c	54.7	9e-08	COG5648	pfam12067	Sox_C_TAD	Sox C-terminal transactivation domain. This domain is found at the C-terminus of the Sox family of transcription factors. It is found associated with pfam00505. It binds to the Armadillo repeats (pfam00514) in Catenin beta-1 (CTNNB1), which is involved in transcriptional regulation. It functions as a transactivating domain (TAD).	GO:0001525|angiogenesis;GO:0060070|canonical Wnt signaling pathway;GO:0060913|cardiac cell fate determination;GO:0003142|cardiogenic plate morphogenesis;GO:0042074|cell migration involved in gastrulation;GO:0061009|common bile duct development;GO:0048617|embryonic foregut morphogenesis;GO:0035050|embryonic heart tube development;GO:0003143|embryonic heart tube morphogenesis;GO:0048568|embryonic o…	GO:0044798|nuclear transcription factor complex;GO:0005634|nucleus;GO:0005667|transcription factor complex;	GO:0008013|beta-catenin binding;GO:0003677|DNA binding;GO:0046982|protein heterodimerization activity;GO:0000981|RNA polymerase II transcription factor activity, sequence-specific DNA binding;GO:0043565|sequence-specific DNA binding;GO:0003713|transcription coactivator activity;GO:0003705|transcription factor activity, RNA polymerase II distal enhancer sequence-specific binding;GO:0003700|transcr…	K04495	SOX17; transcription factor SOX17 (SOX group F)
chr1	4492099	4493768	1670	4493035	45	11.7641	3.23508	7.42037	3_peak_1b	chr1	4493767	4493863	Exon	ENSMUSG00000025902	Sox17	gi|148682294|gb|EDL14241.1|	1753	0	SRY-box containing gene 17, isoform CRA_b, partial [Mus musculus]	gi|575501716|ref|NM_001289465.1|	3242	0	Mus musculus SRY (sex determining region Y)-box 17 (Sox17), transcript variant 3, mRNA	Q61473	308	1e-97	Transcription factor SOX-17	SPAC57A10.09c	54.7	9e-08	COG5648	pfam12067	Sox_C_TAD	Sox C-terminal transactivation domain. This domain is found at the C-terminus of the Sox family of transcription factors. It is found associated with pfam00505. It binds to the Armadillo repeats (pfam00514) in Catenin beta-1 (CTNNB1), which is involved in transcriptional regulation. It functions as a transactivating domain (TAD).	GO:0001525|angiogenesis;GO:0060070|canonical Wnt signaling pathway;GO:0060913|cardiac cell fate determination;GO:0003142|cardiogenic plate morphogenesis;GO:0042074|cell migration involved in gastrulation;GO:0061009|common bile duct development;GO:0048617|embryonic foregut morphogenesis;GO:0035050|embryonic heart tube development;GO:0003143|embryonic heart tube morphogenesis;GO:0048568|embryonic o…	GO:0044798|nuclear transcription factor complex;GO:0005634|nucleus;GO:0005667|transcription factor complex;	GO:0008013|beta-catenin binding;GO:0003677|DNA binding;GO:0046982|protein heterodimerization activity;GO:0000981|RNA polymerase II transcription factor activity, sequence-specific DNA binding;GO:0043565|sequence-specific DNA binding;GO:0003713|transcription coactivator activity;GO:0003705|transcription factor activity, RNA polymerase II distal enhancer sequence-specific binding;GO:0003700|transcr…	K04495	SOX17; transcription factor SOX17 (SOX group F)
chr1	4492099	4493768	1670	4493035	45	11.7641	3.23508	7.42037	3_peak_1b	chr1	4492663	4493767	Intron	ENSMUSG00000025902	Sox17	gi|148682294|gb|EDL14241.1|	1753	0	SRY-box containing gene 17, isoform CRA_b, partial [Mus musculus]	gi|575501716|ref|NM_001289465.1|	3242	0	Mus musculus SRY (sex determining region Y)-box 17 (Sox17), transcript variant 3, mRNA	Q61473	308	1e-97	Transcription factor SOX-17	SPAC57A10.09c	54.7	9e-08	COG5648	pfam12067	Sox_C_TAD	Sox C-terminal transactivation domain. This domain is found at the C-terminus of the Sox family of transcription factors. It is found associated with pfam00505. It binds to the Armadillo repeats (pfam00514) in Catenin beta-1 (CTNNB1), which is involved in transcriptional regulation. It functions as a transactivating domain (TAD).	GO:0001525|angiogenesis;GO:0060070|canonical Wnt signaling pathway;GO:0060913|cardiac cell fate determination;GO:0003142|cardiogenic plate morphogenesis;GO:0042074|cell migration involved in gastrulation;GO:0061009|common bile duct development;GO:0048617|embryonic foregut morphogenesis;GO:0035050|embryonic heart tube development;GO:0003143|embryonic heart tube morphogenesis;GO:0048568|embryonic o…	GO:0044798|nuclear transcription factor complex;GO:0005634|nucleus;GO:0005667|transcription factor complex;	GO:0008013|beta-catenin binding;GO:0003677|DNA binding;GO:0046982|protein heterodimerization activity;GO:0000981|RNA polymerase II transcription factor activity, sequence-specific DNA binding;GO:0043565|sequence-specific DNA binding;GO:0003713|transcription coactivator activity;GO:0003705|transcription factor activity, RNA polymerase II distal enhancer sequence-specific binding;GO:0003700|transcr…	K04495	SOX17; transcription factor SOX17 (SOX group F)
chr1	4492099	4493768	1670	4493035	45	11.7641	3.23508	7.42037	3_peak_1b	chr1	4492668	4493099	Intron	ENSMUSG00000025902	Sox17	gi|148682294|gb|EDL14241.1|	1753	0	SRY-box containing gene 17, isoform CRA_b, partial [Mus musculus]	gi|575501716|ref|NM_001289465.1|	3242	0	Mus musculus SRY (sex determining region Y)-box 17 (Sox17), transcript variant 3, mRNA	Q61473	308	1e-97	Transcription factor SOX-17	SPAC57A10.09c	54.7	9e-08	COG5648	pfam12067	Sox_C_TAD	Sox C-terminal transactivation domain. This domain is found at the C-terminus of the Sox family of transcription factors. It is found associated with pfam00505. It binds to the Armadillo repeats (pfam00514) in Catenin beta-1 (CTNNB1), which is involved in transcriptional regulation. It functions as a transactivating domain (TAD).	GO:0001525|angiogenesis;GO:0060070|canonical Wnt signaling pathway;GO:0060913|cardiac cell fate determination;GO:0003142|cardiogenic plate morphogenesis;GO:0042074|cell migration involved in gastrulation;GO:0061009|common bile duct development;GO:0048617|embryonic foregut morphogenesis;GO:0035050|embryonic heart tube development;GO:0003143|embryonic heart tube morphogenesis;GO:0048568|embryonic o…	GO:0044798|nuclear transcription factor complex;GO:0005634|nucleus;GO:0005667|transcription factor complex;	GO:0008013|beta-catenin binding;GO:0003677|DNA binding;GO:0046982|protein heterodimerization activity;GO:0000981|RNA polymerase II transcription factor activity, sequence-specific DNA binding;GO:0043565|sequence-specific DNA binding;GO:0003713|transcription coactivator activity;GO:0003705|transcription factor activity, RNA polymerase II distal enhancer sequence-specific binding;GO:0003700|transcr…	K04495	SOX17; transcription factor SOX17 (SOX group F)
chr1	4492099	4493768	1670	4493035	45	11.7641	3.23508	7.42037	3_peak_1b	chr1	4492668	4493771	Intron	ENSMUSG00000025902	Sox17	gi|148682294|gb|EDL14241.1|	1753	0	SRY-box containing gene 17, isoform CRA_b, partial [Mus musculus]	gi|575501716|ref|NM_001289465.1|	3242	0	Mus musculus SRY (sex determining region Y)-box 17 (Sox17), transcript variant 3, mRNA	Q61473	308	1e-97	Transcription factor SOX-17	SPAC57A10.09c	54.7	9e-08	COG5648	pfam12067	Sox_C_TAD	Sox C-terminal transactivation domain. This domain is found at the C-terminus of the Sox family of transcription factors. It is found associated with pfam00505. It binds to the Armadillo repeats (pfam00514) in Catenin beta-1 (CTNNB1), which is involved in transcriptional regulation. It functions as a transactivating domain (TAD).	GO:0001525|angiogenesis;GO:0060070|canonical Wnt signaling pathway;GO:0060913|cardiac cell fate determination;GO:0003142|cardiogenic plate morphogenesis;GO:0042074|cell migration involved in gastrulation;GO:0061009|common bile duct development;GO:0048617|embryonic foregut morphogenesis;GO:0035050|embryonic heart tube development;GO:0003143|embryonic heart tube morphogenesis;GO:0048568|embryonic o…	GO:0044798|nuclear transcription factor complex;GO:0005634|nucleus;GO:0005667|transcription factor complex;	GO:0008013|beta-catenin binding;GO:0003677|DNA binding;GO:0046982|protein heterodimerization activity;GO:0000981|RNA polymerase II transcription factor activity, sequence-specific DNA binding;GO:0043565|sequence-specific DNA binding;GO:0003713|transcription coactivator activity;GO:0003705|transcription factor activity, RNA polymerase II distal enhancer sequence-specific binding;GO:0003700|transcr…	K04495	SOX17; transcription factor SOX17 (SOX group F)
chr1	4492099	4493768	1670	4493035	45	11.7641	3.23508	7.42037	3_peak_1b	chr1	4493466	4493771	Intron	ENSMUSG00000025902	Sox17	gi|148682294|gb|EDL14241.1|	1753	0	SRY-box containing gene 17, isoform CRA_b, partial [Mus musculus]	gi|575501716|ref|NM_001289465.1|	3242	0	Mus musculus SRY (sex determining region Y)-box 17 (Sox17), transcript variant 3, mRNA	Q61473	308	1e-97	Transcription factor SOX-17	SPAC57A10.09c	54.7	9e-08	COG5648	pfam12067	Sox_C_TAD	Sox C-terminal transactivation domain. This domain is found at the C-terminus of the Sox family of transcription factors. It is found associated with pfam00505. It binds to the Armadillo repeats (pfam00514) in Catenin beta-1 (CTNNB1), which is involved in transcriptional regulation. It functions as a transactivating domain (TAD).	GO:0001525|angiogenesis;GO:0060070|canonical Wnt signaling pathway;GO:0060913|cardiac cell fate determination;GO:0003142|cardiogenic plate morphogenesis;GO:0042074|cell migration involved in gastrulation;GO:0061009|common bile duct development;GO:0048617|embryonic foregut morphogenesis;GO:0035050|embryonic heart tube development;GO:0003143|embryonic heart tube morphogenesis;GO:0048568|embryonic o…	GO:0044798|nuclear transcription factor complex;GO:0005634|nucleus;GO:0005667|transcription factor complex;	GO:0008013|beta-catenin binding;GO:0003677|DNA binding;GO:0046982|protein heterodimerization activity;GO:0000981|RNA polymerase II transcription factor activity, sequence-specific DNA binding;GO:0043565|sequence-specific DNA binding;GO:0003713|transcription coactivator activity;GO:0003705|transcription factor activity, RNA polymerase II distal enhancer sequence-specific binding;GO:0003700|transcr…	K04495	SOX17; transcription factor SOX17 (SOX group F)
chr1	4492099	4493768	1670	4493035	45	11.7641	3.23508	7.42037	3_peak_1b	chr1	4493490	4493771	Intron	ENSMUSG00000025902	Sox17	gi|148682294|gb|EDL14241.1|	1753	0	SRY-box containing gene 17, isoform CRA_b, partial [Mus musculus]	gi|575501716|ref|NM_001289465.1|	3242	0	Mus musculus SRY (sex determining region Y)-box 17 (Sox17), transcript variant 3, mRNA	Q61473	308	1e-97	Transcription factor SOX-17	SPAC57A10.09c	54.7	9e-08	COG5648	pfam12067	Sox_C_TAD	Sox C-terminal transactivation domain. This domain is found at the C-terminus of the Sox family of transcription factors. It is found associated with pfam00505. It binds to the Armadillo repeats (pfam00514) in Catenin beta-1 (CTNNB1), which is involved in transcriptional regulation. It functions as a transactivating domain (TAD).	GO:0001525|angiogenesis;GO:0060070|canonical Wnt signaling pathway;GO:0060913|cardiac cell fate determination;GO:0003142|cardiogenic plate morphogenesis;GO:0042074|cell migration involved in gastrulation;GO:0061009|common bile duct development;GO:0048617|embryonic foregut morphogenesis;GO:0035050|embryonic heart tube development;GO:0003143|embryonic heart tube morphogenesis;GO:0048568|embryonic o…	GO:0044798|nuclear transcription factor complex;GO:0005634|nucleus;GO:0005667|transcription factor complex;	GO:0008013|beta-catenin binding;GO:0003677|DNA binding;GO:0046982|protein heterodimerization activity;GO:0000981|RNA polymerase II transcription factor activity, sequence-specific DNA binding;GO:0043565|sequence-specific DNA binding;GO:0003713|transcription coactivator activity;GO:0003705|transcription factor activity, RNA polymerase II distal enhancer sequence-specific binding;GO:0003700|transcr…	K04495	SOX17; transcription factor SOX17 (SOX group F)
chr1	4492099	4493768	1670	4493035	45	11.7641	3.23508	7.42037	3_peak_1b	chr1	4493490	4495135	Intron	ENSMUSG00000025902	Sox17	gi|148682294|gb|EDL14241.1|	1753	0	SRY-box containing gene 17, isoform CRA_b, partial [Mus musculus]	gi|575501716|ref|NM_001289465.1|	3242	0	Mus musculus SRY (sex determining region Y)-box 17 (Sox17), transcript variant 3, mRNA	Q61473	308	1e-97	Transcription factor SOX-17	SPAC57A10.09c	54.7	9e-08	COG5648	pfam12067	Sox_C_TAD	Sox C-terminal transactivation domain. This domain is found at the C-terminus of the Sox family of transcription factors. It is found associated with pfam00505. It binds to the Armadillo repeats (pfam00514) in Catenin beta-1 (CTNNB1), which is involved in transcriptional regulation. It functions as a transactivating domain (TAD).	GO:0001525|angiogenesis;GO:0060070|canonical Wnt signaling pathway;GO:0060913|cardiac cell fate determination;GO:0003142|cardiogenic plate morphogenesis;GO:0042074|cell migration involved in gastrulation;GO:0061009|common bile duct development;GO:0048617|embryonic foregut morphogenesis;GO:0035050|embryonic heart tube development;GO:0003143|embryonic heart tube morphogenesis;GO:0048568|embryonic o…	GO:0044798|nuclear transcription factor complex;GO:0005634|nucleus;GO:0005667|transcription factor complex;	GO:0008013|beta-catenin binding;GO:0003677|DNA binding;GO:0046982|protein heterodimerization activity;GO:0000981|RNA polymerase II transcription factor activity, sequence-specific DNA binding;GO:0043565|sequence-specific DNA binding;GO:0003713|transcription coactivator activity;GO:0003705|transcription factor activity, RNA polymerase II distal enhancer sequence-specific binding;GO:0003700|transcr…	K04495	SOX17; transcription factor SOX17 (SOX group F)
chr1	4492099	4493768	1670	4493035	45	11.7641	3.23508	7.42037	3_peak_1b	chr1	4493604	4495604	Upstream2k	ENSMUSG00000025902	Sox17	gi|148682294|gb|EDL14241.1|	1753	0	SRY-box containing gene 17, isoform CRA_b, partial [Mus musculus]	gi|575501716|ref|NM_001289465.1|	3242	0	Mus musculus SRY (sex determining region Y)-box 17 (Sox17), transcript variant 3, mRNA	Q61473	308	1e-97	Transcription factor SOX-17	SPAC57A10.09c	54.7	9e-08	COG5648	pfam12067	Sox_C_TAD	Sox C-terminal transactivation domain. This domain is found at the C-terminus of the Sox family of transcription factors. It is found associated with pfam00505. It binds to the Armadillo repeats (pfam00514) in Catenin beta-1 (CTNNB1), which is involved in transcriptional regulation. It functions as a transactivating domain (TAD).	GO:0001525|angiogenesis;GO:0060070|canonical Wnt signaling pathway;GO:0060913|cardiac cell fate determination;GO:0003142|cardiogenic plate morphogenesis;GO:0042074|cell migration involved in gastrulation;GO:0061009|common bile duct development;GO:0048617|embryonic foregut morphogenesis;GO:0035050|embryonic heart tube development;GO:0003143|embryonic heart tube morphogenesis;GO:0048568|embryonic o…	GO:0044798|nuclear transcription factor complex;GO:0005634|nucleus;GO:0005667|transcription factor complex;	GO:0008013|beta-catenin binding;GO:0003677|DNA binding;GO:0046982|protein heterodimerization activity;GO:0000981|RNA polymerase II transcription factor activity, sequence-specific DNA binding;GO:0043565|sequence-specific DNA binding;GO:0003713|transcription coactivator activity;GO:0003705|transcription factor activity, RNA polymerase II distal enhancer sequence-specific binding;GO:0003700|transcr…	K04495	SOX17; transcription factor SOX17 (SOX group F)
chr1	4492099	4493768	1670	4493035	45	11.7641	3.23508	7.42037	3_peak_1b	chr1	4493735	4495735	Upstream2k	ENSMUSG00000025902	Sox17	gi|148682294|gb|EDL14241.1|	1753	0	SRY-box containing gene 17, isoform CRA_b, partial [Mus musculus]	gi|575501716|ref|NM_001289465.1|	3242	0	Mus musculus SRY (sex determining region Y)-box 17 (Sox17), transcript variant 3, mRNA	Q61473	308	1e-97	Transcription factor SOX-17	SPAC57A10.09c	54.7	9e-08	COG5648	pfam12067	Sox_C_TAD	Sox C-terminal transactivation domain. This domain is found at the C-terminus of the Sox family of transcription factors. It is found associated with pfam00505. It binds to the Armadillo repeats (pfam00514) in Catenin beta-1 (CTNNB1), which is involved in transcriptional regulation. It functions as a transactivating domain (TAD).	GO:0001525|angiogenesis;GO:0060070|canonical Wnt signaling pathway;GO:0060913|cardiac cell fate determination;GO:0003142|cardiogenic plate morphogenesis;GO:0042074|cell migration involved in gastrulation;GO:0061009|common bile duct development;GO:0048617|embryonic foregut morphogenesis;GO:0035050|embryonic heart tube development;GO:0003143|embryonic heart tube morphogenesis;GO:0048568|embryonic o…	GO:0044798|nuclear transcription factor complex;GO:0005634|nucleus;GO:0005667|transcription factor complex;	GO:0008013|beta-catenin binding;GO:0003677|DNA binding;GO:0046982|protein heterodimerization activity;GO:0000981|RNA polymerase II transcription factor activity, sequence-specific DNA binding;GO:0043565|sequence-specific DNA binding;GO:0003713|transcription coactivator activity;GO:0003705|transcription factor activity, RNA polymerase II distal enhancer sequence-specific binding;GO:0003700|transcr…	K04495	SOX17; transcription factor SOX17 (SOX group F)
chr1	4492099	4493768	1670	4493035	45	11.7641	3.23508	7.42037	3_peak_1b	chr1	4492591	4492663	UTR5	ENSMUSG00000025902	Sox17	gi|148682294|gb|EDL14241.1|	1753	0	SRY-box containing gene 17, isoform CRA_b, partial [Mus musculus]	gi|575501716|ref|NM_001289465.1|	3242	0	Mus musculus SRY (sex determining region Y)-box 17 (Sox17), transcript variant 3, mRNA	Q61473	308	1e-97	Transcription factor SOX-17	SPAC57A10.09c	54.7	9e-08	COG5648	pfam12067	Sox_C_TAD	Sox C-terminal transactivation domain. This domain is found at the C-terminus of the Sox family of transcription factors. It is found associated with pfam00505. It binds to the Armadillo repeats (pfam00514) in Catenin beta-1 (CTNNB1), which is involved in transcriptional regulation. It functions as a transactivating domain (TAD).	GO:0001525|angiogenesis;GO:0060070|canonical Wnt signaling pathway;GO:0060913|cardiac cell fate determination;GO:0003142|cardiogenic plate morphogenesis;GO:0042074|cell migration involved in gastrulation;GO:0061009|common bile duct development;GO:0048617|embryonic foregut morphogenesis;GO:0035050|embryonic heart tube development;GO:0003143|embryonic heart tube morphogenesis;GO:0048568|embryonic o…	GO:0044798|nuclear transcription factor complex;GO:0005634|nucleus;GO:0005667|transcription factor complex;	GO:0008013|beta-catenin binding;GO:0003677|DNA binding;GO:0046982|protein heterodimerization activity;GO:0000981|RNA polymerase II transcription factor activity, sequence-specific DNA binding;GO:0043565|sequence-specific DNA binding;GO:0003713|transcription coactivator activity;GO:0003705|transcription factor activity, RNA polymerase II distal enhancer sequence-specific binding;GO:0003700|transcr…	K04495	SOX17; transcription factor SOX17 (SOX group F)
chr1	4492099	4493768	1670	4493035	45	11.7641	3.23508	7.42037	3_peak_1b	chr1	4493406	4493466	UTR5	ENSMUSG00000025902	Sox17	gi|148682294|gb|EDL14241.1|	1753	0	SRY-box containing gene 17, isoform CRA_b, partial [Mus musculus]	gi|575501716|ref|NM_001289465.1|	3242	0	Mus musculus SRY (sex determining region Y)-box 17 (Sox17), transcript variant 3, mRNA	Q61473	308	1e-97	Transcription factor SOX-17	SPAC57A10.09c	54.7	9e-08	COG5648	pfam12067	Sox_C_TAD	Sox C-terminal transactivation domain. This domain is found at the C-terminus of the Sox family of transcription factors. It is found associated with pfam00505. It binds to the Armadillo repeats (pfam00514) in Catenin beta-1 (CTNNB1), which is involved in transcriptional regulation. It functions as a transactivating domain (TAD).	GO:0001525|angiogenesis;GO:0060070|canonical Wnt signaling pathway;GO:0060913|cardiac cell fate determination;GO:0003142|cardiogenic plate morphogenesis;GO:0042074|cell migration involved in gastrulation;GO:0061009|common bile duct development;GO:0048617|embryonic foregut morphogenesis;GO:0035050|embryonic heart tube development;GO:0003143|embryonic heart tube morphogenesis;GO:0048568|embryonic o…	GO:0044798|nuclear transcription factor complex;GO:0005634|nucleus;GO:0005667|transcription factor complex;	GO:0008013|beta-catenin binding;GO:0003677|DNA binding;GO:0046982|protein heterodimerization activity;GO:0000981|RNA polymerase II transcription factor activity, sequence-specific DNA binding;GO:0043565|sequence-specific DNA binding;GO:0003713|transcription coactivator activity;GO:0003705|transcription factor activity, RNA polymerase II distal enhancer sequence-specific binding;GO:0003700|transcr…	K04495	SOX17; transcription factor SOX17 (SOX group F)
chr1	4492099	4493768	1670	4493035	45	11.7641	3.23508	7.42037	3_peak_1b	chr1	4493406	4493490	UTR5	ENSMUSG00000025902	Sox17	gi|148682294|gb|EDL14241.1|	1753	0	SRY-box containing gene 17, isoform CRA_b, partial [Mus musculus]	gi|575501716|ref|NM_001289465.1|	3242	0	Mus musculus SRY (sex determining region Y)-box 17 (Sox17), transcript variant 3, mRNA	Q61473	308	1e-97	Transcription factor SOX-17	SPAC57A10.09c	54.7	9e-08	COG5648	pfam12067	Sox_C_TAD	Sox C-terminal transactivation domain. This domain is found at the C-terminus of the Sox family of transcription factors. It is found associated with pfam00505. It binds to the Armadillo repeats (pfam00514) in Catenin beta-1 (CTNNB1), which is involved in transcriptional regulation. It functions as a transactivating domain (TAD).	GO:0001525|angiogenesis;GO:0060070|canonical Wnt signaling pathway;GO:0060913|cardiac cell fate determination;GO:0003142|cardiogenic plate morphogenesis;GO:0042074|cell migration involved in gastrulation;GO:0061009|common bile duct development;GO:0048617|embryonic foregut morphogenesis;GO:0035050|embryonic heart tube development;GO:0003143|embryonic heart tube morphogenesis;GO:0048568|embryonic o…	GO:0044798|nuclear transcription factor complex;GO:0005634|nucleus;GO:0005667|transcription factor complex;	GO:0008013|beta-catenin binding;GO:0003677|DNA binding;GO:0046982|protein heterodimerization activity;GO:0000981|RNA polymerase II transcription factor activity, sequence-specific DNA binding;GO:0043565|sequence-specific DNA binding;GO:0003713|transcription coactivator activity;GO:0003705|transcription factor activity, RNA polymerase II distal enhancer sequence-specific binding;GO:0003700|transcr…	K04495	SOX17; transcription factor SOX17 (SOX group F)
chr1	4492099	4493768	1670	4493035	45	11.7641	3.23508	7.42037	3_peak_1b	chr1	4493406	4493735	UTR5	ENSMUSG00000025902	Sox17	gi|148682294|gb|EDL14241.1|	1753	0	SRY-box containing gene 17, isoform CRA_b, partial [Mus musculus]	gi|575501716|ref|NM_001289465.1|	3242	0	Mus musculus SRY (sex determining region Y)-box 17 (Sox17), transcript variant 3, mRNA	Q61473	308	1e-97	Transcription factor SOX-17	SPAC57A10.09c	54.7	9e-08	COG5648	pfam12067	Sox_C_TAD	Sox C-terminal transactivation domain. This domain is found at the C-terminus of the Sox family of transcription factors. It is found associated with pfam00505. It binds to the Armadillo repeats (pfam00514) in Catenin beta-1 (CTNNB1), which is involved in transcriptional regulation. It functions as a transactivating domain (TAD).	GO:0001525|angiogenesis;GO:0060070|canonical Wnt signaling pathway;GO:0060913|cardiac cell fate determination;GO:0003142|cardiogenic plate morphogenesis;GO:0042074|cell migration involved in gastrulation;GO:0061009|common bile duct development;GO:0048617|embryonic foregut morphogenesis;GO:0035050|embryonic heart tube development;GO:0003143|embryonic heart tube morphogenesis;GO:0048568|embryonic o…	GO:0044798|nuclear transcription factor complex;GO:0005634|nucleus;GO:0005667|transcription factor complex;	GO:0008013|beta-catenin binding;GO:0003677|DNA binding;GO:0046982|protein heterodimerization activity;GO:0000981|RNA polymerase II transcription factor activity, sequence-specific DNA binding;GO:0043565|sequence-specific DNA binding;GO:0003713|transcription coactivator activity;GO:0003705|transcription factor activity, RNA polymerase II distal enhancer sequence-specific binding;GO:0003700|transcr…	K04495	SOX17; transcription factor SOX17 (SOX group F)
chr1	4492099	4493768	1670	4493035	45	11.7641	3.23508	7.42037	3_peak_1b	chr1	4493767	4493863	UTR5	ENSMUSG00000025902	Sox17	gi|148682294|gb|EDL14241.1|	1753	0	SRY-box containing gene 17, isoform CRA_b, partial [Mus musculus]	gi|575501716|ref|NM_001289465.1|	3242	0	Mus musculus SRY (sex determining region Y)-box 17 (Sox17), transcript variant 3, mRNA	Q61473	308	1e-97	Transcription factor SOX-17	SPAC57A10.09c	54.7	9e-08	COG5648	pfam12067	Sox_C_TAD	Sox C-terminal transactivation domain. This domain is found at the C-terminus of the Sox family of transcription factors. It is found associated with pfam00505. It binds to the Armadillo repeats (pfam00514) in Catenin beta-1 (CTNNB1), which is involved in transcriptional regulation. It functions as a transactivating domain (TAD).	GO:0001525|angiogenesis;GO:0060070|canonical Wnt signaling pathway;GO:0060913|cardiac cell fate determination;GO:0003142|cardiogenic plate morphogenesis;GO:0042074|cell migration involved in gastrulation;GO:0061009|common bile duct development;GO:0048617|embryonic foregut morphogenesis;GO:0035050|embryonic heart tube development;GO:0003143|embryonic heart tube morphogenesis;GO:0048568|embryonic o…	GO:0044798|nuclear transcription factor complex;GO:0005634|nucleus;GO:0005667|transcription factor complex;	GO:0008013|beta-catenin binding;GO:0003677|DNA binding;GO:0046982|protein heterodimerization activity;GO:0000981|RNA polymerase II transcription factor activity, sequence-specific DNA binding;GO:0043565|sequence-specific DNA binding;GO:0003713|transcription coactivator activity;GO:0003705|transcription factor activity, RNA polymerase II distal enhancer sequence-specific binding;GO:0003700|transcr…	K04495	SOX17; transcription factor SOX17 (SOX group F)
chr1	4492099	4493768	1670	4492353	44	12.3021	3.39702	7.9028	3_peak_1a	chr1	4490456	4492456	Downstream2k	ENSMUSG00000025902	Sox17	gi|148682294|gb|EDL14241.1|	1753	0	SRY-box containing gene 17, isoform CRA_b, partial [Mus musculus]	gi|575501716|ref|NM_001289465.1|	3242	0	Mus musculus SRY (sex determining region Y)-box 17 (Sox17), transcript variant 3, mRNA	Q61473	308	1e-97	Transcription factor SOX-17	SPAC57A10.09c	54.7	9e-08	COG5648	pfam12067	Sox_C_TAD	Sox C-terminal transactivation domain. This domain is found at the C-terminus of the Sox family of transcription factors. It is found associated with pfam00505. It binds to the Armadillo repeats (pfam00514) in Catenin beta-1 (CTNNB1), which is involved in transcriptional regulation. It functions as a transactivating domain (TAD).	GO:0001525|angiogenesis;GO:0060070|canonical Wnt signaling pathway;GO:0060913|cardiac cell fate determination;GO:0003142|cardiogenic plate morphogenesis;GO:0042074|cell migration involved in gastrulation;GO:0061009|common bile duct development;GO:0048617|embryonic foregut morphogenesis;GO:0035050|embryonic heart tube development;GO:0003143|embryonic heart tube morphogenesis;GO:0048568|embryonic o…	GO:0044798|nuclear transcription factor complex;GO:0005634|nucleus;GO:0005667|transcription factor complex;	GO:0008013|beta-catenin binding;GO:0003677|DNA binding;GO:0046982|protein heterodimerization activity;GO:0000981|RNA polymerase II transcription factor activity, sequence-specific DNA binding;GO:0043565|sequence-specific DNA binding;GO:0003713|transcription coactivator activity;GO:0003705|transcription factor activity, RNA polymerase II distal enhancer sequence-specific binding;GO:0003700|transcr…	K04495	SOX17; transcription factor SOX17 (SOX group F)
chr1	4492099	4493768	1670	4492353	44	12.3021	3.39702	7.9028	3_peak_1a	chr1	4490457	4492457	Downstream2k	ENSMUSG00000025902	Sox17	gi|148682294|gb|EDL14241.1|	1753	0	SRY-box containing gene 17, isoform CRA_b, partial [Mus musculus]	gi|575501716|ref|NM_001289465.1|	3242	0	Mus musculus SRY (sex determining region Y)-box 17 (Sox17), transcript variant 3, mRNA	Q61473	308	1e-97	Transcription factor SOX-17	SPAC57A10.09c	54.7	9e-08	COG5648	pfam12067	Sox_C_TAD	Sox C-terminal transactivation domain. This domain is found at the C-terminus of the Sox family of transcription factors. It is found associated with pfam00505. It binds to the Armadillo repeats (pfam00514) in Catenin beta-1 (CTNNB1), which is involved in transcriptional regulation. It functions as a transactivating domain (TAD).	GO:0001525|angiogenesis;GO:0060070|canonical Wnt signaling pathway;GO:0060913|cardiac cell fate determination;GO:0003142|cardiogenic plate morphogenesis;GO:0042074|cell migration involved in gastrulation;GO:0061009|common bile duct development;GO:0048617|embryonic foregut morphogenesis;GO:0035050|embryonic heart tube development;GO:0003143|embryonic heart tube morphogenesis;GO:0048568|embryonic o…	GO:0044798|nuclear transcription factor complex;GO:0005634|nucleus;GO:0005667|transcription factor complex;	GO:0008013|beta-catenin binding;GO:0003677|DNA binding;GO:0046982|protein heterodimerization activity;GO:0000981|RNA polymerase II transcription factor activity, sequence-specific DNA binding;GO:0043565|sequence-specific DNA binding;GO:0003713|transcription coactivator activity;GO:0003705|transcription factor activity, RNA polymerase II distal enhancer sequence-specific binding;GO:0003700|transcr…	K04495	SOX17; transcription factor SOX17 (SOX group F)
chr1	4492099	4493768	1670	4492353	44	12.3021	3.39702	7.9028	3_peak_1a	chr1	4490464	4492464	Downstream2k	ENSMUSG00000025902	Sox17	gi|148682294|gb|EDL14241.1|	1753	0	SRY-box containing gene 17, isoform CRA_b, partial [Mus musculus]	gi|575501716|ref|NM_001289465.1|	3242	0	Mus musculus SRY (sex determining region Y)-box 17 (Sox17), transcript variant 3, mRNA	Q61473	308	1e-97	Transcription factor SOX-17	SPAC57A10.09c	54.7	9e-08	COG5648	pfam12067	Sox_C_TAD	Sox C-terminal transactivation domain. This domain is found at the C-terminus of the Sox family of transcription factors. It is found associated with pfam00505. It binds to the Armadillo repeats (pfam00514) in Catenin beta-1 (CTNNB1), which is involved in transcriptional regulation. It functions as a transactivating domain (TAD).	GO:0001525|angiogenesis;GO:0060070|canonical Wnt signaling pathway;GO:0060913|cardiac cell fate determination;GO:0003142|cardiogenic plate morphogenesis;GO:0042074|cell migration involved in gastrulation;GO:0061009|common bile duct development;GO:0048617|embryonic foregut morphogenesis;GO:0035050|embryonic heart tube development;GO:0003143|embryonic heart tube morphogenesis;GO:0048568|embryonic o…	GO:0044798|nuclear transcription factor complex;GO:0005634|nucleus;GO:0005667|transcription factor complex;	GO:0008013|beta-catenin binding;GO:0003677|DNA binding;GO:0046982|protein heterodimerization activity;GO:0000981|RNA polymerase II transcription factor activity, sequence-specific DNA binding;GO:0043565|sequence-specific DNA binding;GO:0003713|transcription coactivator activity;GO:0003705|transcription factor activity, RNA polymerase II distal enhancer sequence-specific binding;GO:0003700|transcr…	K04495	SOX17; transcription factor SOX17 (SOX group F)
chr1	4492099	4493768	1670	4492353	44	12.3021	3.39702	7.9028	3_peak_1a	chr1	4490466	4492466	Downstream2k	ENSMUSG00000025902	Sox17	gi|148682294|gb|EDL14241.1|	1753	0	SRY-box containing gene 17, isoform CRA_b, partial [Mus musculus]	gi|575501716|ref|NM_001289465.1|	3242	0	Mus musculus SRY (sex determining region Y)-box 17 (Sox17), transcript variant 3, mRNA	Q61473	308	1e-97	Transcription factor SOX-17	SPAC57A10.09c	54.7	9e-08	COG5648	pfam12067	Sox_C_TAD	Sox C-terminal transactivation domain. This domain is found at the C-terminus of the Sox family of transcription factors. It is found associated with pfam00505. It binds to the Armadillo repeats (pfam00514) in Catenin beta-1 (CTNNB1), which is involved in transcriptional regulation. It functions as a transactivating domain (TAD).	GO:0001525|angiogenesis;GO:0060070|canonical Wnt signaling pathway;GO:0060913|cardiac cell fate determination;GO:0003142|cardiogenic plate morphogenesis;GO:0042074|cell migration involved in gastrulation;GO:0061009|common bile duct development;GO:0048617|embryonic foregut morphogenesis;GO:0035050|embryonic heart tube development;GO:0003143|embryonic heart tube morphogenesis;GO:0048568|embryonic o…	GO:0044798|nuclear transcription factor complex;GO:0005634|nucleus;GO:0005667|transcription factor complex;	GO:0008013|beta-catenin binding;GO:0003677|DNA binding;GO:0046982|protein heterodimerization activity;GO:0000981|RNA polymerase II transcription factor activity, sequence-specific DNA binding;GO:0043565|sequence-specific DNA binding;GO:0003713|transcription coactivator activity;GO:0003705|transcription factor activity, RNA polymerase II distal enhancer sequence-specific binding;GO:0003700|transcr…	K04495	SOX17; transcription factor SOX17 (SOX group F)
chr1	4492099	4493768	1670	4492353	44	12.3021	3.39702	7.9028	3_peak_1a	chr1	4490930	4492668	Exon	ENSMUSG00000025902	Sox17	gi|148682294|gb|EDL14241.1|	1753	0	SRY-box containing gene 17, isoform CRA_b, partial [Mus musculus]	gi|575501716|ref|NM_001289465.1|	3242	0	Mus musculus SRY (sex determining region Y)-box 17 (Sox17), transcript variant 3, mRNA	Q61473	308	1e-97	Transcription factor SOX-17	SPAC57A10.09c	54.7	9e-08	COG5648	pfam12067	Sox_C_TAD	Sox C-terminal transactivation domain. This domain is found at the C-terminus of the Sox family of transcription factors. It is found associated with pfam00505. It binds to the Armadillo repeats (pfam00514) in Catenin beta-1 (CTNNB1), which is involved in transcriptional regulation. It functions as a transactivating domain (TAD).	GO:0001525|angiogenesis;GO:0060070|canonical Wnt signaling pathway;GO:0060913|cardiac cell fate determination;GO:0003142|cardiogenic plate morphogenesis;GO:0042074|cell migration involved in gastrulation;GO:0061009|common bile duct development;GO:0048617|embryonic foregut morphogenesis;GO:0035050|embryonic heart tube development;GO:0003143|embryonic heart tube morphogenesis;GO:0048568|embryonic o…	GO:0044798|nuclear transcription factor complex;GO:0005634|nucleus;GO:0005667|transcription factor complex;	GO:0008013|beta-catenin binding;GO:0003677|DNA binding;GO:0046982|protein heterodimerization activity;GO:0000981|RNA polymerase II transcription factor activity, sequence-specific DNA binding;GO:0043565|sequence-specific DNA binding;GO:0003713|transcription coactivator activity;GO:0003705|transcription factor activity, RNA polymerase II distal enhancer sequence-specific binding;GO:0003700|transcr…	K04495	SOX17; transcription factor SOX17 (SOX group F)
chr1	4492099	4493768	1670	4492353	44	12.3021	3.39702	7.9028	3_peak_1a	chr1	4491249	4492663	Exon	ENSMUSG00000025902	Sox17	gi|148682294|gb|EDL14241.1|	1753	0	SRY-box containing gene 17, isoform CRA_b, partial [Mus musculus]	gi|575501716|ref|NM_001289465.1|	3242	0	Mus musculus SRY (sex determining region Y)-box 17 (Sox17), transcript variant 3, mRNA	Q61473	308	1e-97	Transcription factor SOX-17	SPAC57A10.09c	54.7	9e-08	COG5648	pfam12067	Sox_C_TAD	Sox C-terminal transactivation domain. This domain is found at the C-terminus of the Sox family of transcription factors. It is found associated with pfam00505. It binds to the Armadillo repeats (pfam00514) in Catenin beta-1 (CTNNB1), which is involved in transcriptional regulation. It functions as a transactivating domain (TAD).	GO:0001525|angiogenesis;GO:0060070|canonical Wnt signaling pathway;GO:0060913|cardiac cell fate determination;GO:0003142|cardiogenic plate morphogenesis;GO:0042074|cell migration involved in gastrulation;GO:0061009|common bile duct development;GO:0048617|embryonic foregut morphogenesis;GO:0035050|embryonic heart tube development;GO:0003143|embryonic heart tube morphogenesis;GO:0048568|embryonic o…	GO:0044798|nuclear transcription factor complex;GO:0005634|nucleus;GO:0005667|transcription factor complex;	GO:0008013|beta-catenin binding;GO:0003677|DNA binding;GO:0046982|protein heterodimerization activity;GO:0000981|RNA polymerase II transcription factor activity, sequence-specific DNA binding;GO:0043565|sequence-specific DNA binding;GO:0003713|transcription coactivator activity;GO:0003705|transcription factor activity, RNA polymerase II distal enhancer sequence-specific binding;GO:0003700|transcr…	K04495	SOX17; transcription factor SOX17 (SOX group F)
chr1	4492099	4493768	1670	4492353	44	12.3021	3.39702	7.9028	3_peak_1a	chr1	4491389	4492668	Exon	ENSMUSG00000025902	Sox17	gi|148682294|gb|EDL14241.1|	1753	0	SRY-box containing gene 17, isoform CRA_b, partial [Mus musculus]	gi|575501716|ref|NM_001289465.1|	3242	0	Mus musculus SRY (sex determining region Y)-box 17 (Sox17), transcript variant 3, mRNA	Q61473	308	1e-97	Transcription factor SOX-17	SPAC57A10.09c	54.7	9e-08	COG5648	pfam12067	Sox_C_TAD	Sox C-terminal transactivation domain. This domain is found at the C-terminus of the Sox family of transcription factors. It is found associated with pfam00505. It binds to the Armadillo repeats (pfam00514) in Catenin beta-1 (CTNNB1), which is involved in transcriptional regulation. It functions as a transactivating domain (TAD).	GO:0001525|angiogenesis;GO:0060070|canonical Wnt signaling pathway;GO:0060913|cardiac cell fate determination;GO:0003142|cardiogenic plate morphogenesis;GO:0042074|cell migration involved in gastrulation;GO:0061009|common bile duct development;GO:0048617|embryonic foregut morphogenesis;GO:0035050|embryonic heart tube development;GO:0003143|embryonic heart tube morphogenesis;GO:0048568|embryonic o…	GO:0044798|nuclear transcription factor complex;GO:0005634|nucleus;GO:0005667|transcription factor complex;	GO:0008013|beta-catenin binding;GO:0003677|DNA binding;GO:0046982|protein heterodimerization activity;GO:0000981|RNA polymerase II transcription factor activity, sequence-specific DNA binding;GO:0043565|sequence-specific DNA binding;GO:0003713|transcription coactivator activity;GO:0003705|transcription factor activity, RNA polymerase II distal enhancer sequence-specific binding;GO:0003700|transcr…	K04495	SOX17; transcription factor SOX17 (SOX group F)
chr1	4492099	4493768	1670	4492353	44	12.3021	3.39702	7.9028	3_peak_1a	chr1	4491712	4492668	Exon	ENSMUSG00000025902	Sox17	gi|148682294|gb|EDL14241.1|	1753	0	SRY-box containing gene 17, isoform CRA_b, partial [Mus musculus]	gi|575501716|ref|NM_001289465.1|	3242	0	Mus musculus SRY (sex determining region Y)-box 17 (Sox17), transcript variant 3, mRNA	Q61473	308	1e-97	Transcription factor SOX-17	SPAC57A10.09c	54.7	9e-08	COG5648	pfam12067	Sox_C_TAD	Sox C-terminal transactivation domain. This domain is found at the C-terminus of the Sox family of transcription factors. It is found associated with pfam00505. It binds to the Armadillo repeats (pfam00514) in Catenin beta-1 (CTNNB1), which is involved in transcriptional regulation. It functions as a transactivating domain (TAD).	GO:0001525|angiogenesis;GO:0060070|canonical Wnt signaling pathway;GO:0060913|cardiac cell fate determination;GO:0003142|cardiogenic plate morphogenesis;GO:0042074|cell migration involved in gastrulation;GO:0061009|common bile duct development;GO:0048617|embryonic foregut morphogenesis;GO:0035050|embryonic heart tube development;GO:0003143|embryonic heart tube morphogenesis;GO:0048568|embryonic o…	GO:0044798|nuclear transcription factor complex;GO:0005634|nucleus;GO:0005667|transcription factor complex;	GO:0008013|beta-catenin binding;GO:0003677|DNA binding;GO:0046982|protein heterodimerization activity;GO:0000981|RNA polymerase II transcription factor activity, sequence-specific DNA binding;GO:0043565|sequence-specific DNA binding;GO:0003713|transcription coactivator activity;GO:0003705|transcription factor activity, RNA polymerase II distal enhancer sequence-specific binding;GO:0003700|transcr…	K04495	SOX17; transcription factor SOX17 (SOX group F)
chr1	4492099	4493768	1670	4492353	44	12.3021	3.39702	7.9028	3_peak_1a	chr1	4492456	4493604	Exon	ENSMUSG00000025902	Sox17	gi|148682294|gb|EDL14241.1|	1753	0	SRY-box containing gene 17, isoform CRA_b, partial [Mus musculus]	gi|575501716|ref|NM_001289465.1|	3242	0	Mus musculus SRY (sex determining region Y)-box 17 (Sox17), transcript variant 3, mRNA	Q61473	308	1e-97	Transcription factor SOX-17	SPAC57A10.09c	54.7	9e-08	COG5648	pfam12067	Sox_C_TAD	Sox C-terminal transactivation domain. This domain is found at the C-terminus of the Sox family of transcription factors. It is found associated with pfam00505. It binds to the Armadillo repeats (pfam00514) in Catenin beta-1 (CTNNB1), which is involved in transcriptional regulation. It functions as a transactivating domain (TAD).	GO:0001525|angiogenesis;GO:0060070|canonical Wnt signaling pathway;GO:0060913|cardiac cell fate determination;GO:0003142|cardiogenic plate morphogenesis;GO:0042074|cell migration involved in gastrulation;GO:0061009|common bile duct development;GO:0048617|embryonic foregut morphogenesis;GO:0035050|embryonic heart tube development;GO:0003143|embryonic heart tube morphogenesis;GO:0048568|embryonic o…	GO:0044798|nuclear transcription factor complex;GO:0005634|nucleus;GO:0005667|transcription factor complex;	GO:0008013|beta-catenin binding;GO:0003677|DNA binding;GO:0046982|protein heterodimerization activity;GO:0000981|RNA polymerase II transcription factor activity, sequence-specific DNA binding;GO:0043565|sequence-specific DNA binding;GO:0003713|transcription coactivator activity;GO:0003705|transcription factor activity, RNA polymerase II distal enhancer sequence-specific binding;GO:0003700|transcr…	K04495	SOX17; transcription factor SOX17 (SOX group F)
chr1	4492099	4493768	1670	4492353	44	12.3021	3.39702	7.9028	3_peak_1a	chr1	4492457	4492668	Exon	ENSMUSG00000025902	Sox17	gi|148682294|gb|EDL14241.1|	1753	0	SRY-box containing gene 17, isoform CRA_b, partial [Mus musculus]	gi|575501716|ref|NM_001289465.1|	3242	0	Mus musculus SRY (sex determining region Y)-box 17 (Sox17), transcript variant 3, mRNA	Q61473	308	1e-97	Transcription factor SOX-17	SPAC57A10.09c	54.7	9e-08	COG5648	pfam12067	Sox_C_TAD	Sox C-terminal transactivation domain. This domain is found at the C-terminus of the Sox family of transcription factors. It is found associated with pfam00505. It binds to the Armadillo repeats (pfam00514) in Catenin beta-1 (CTNNB1), which is involved in transcriptional regulation. It functions as a transactivating domain (TAD).	GO:0001525|angiogenesis;GO:0060070|canonical Wnt signaling pathway;GO:0060913|cardiac cell fate determination;GO:0003142|cardiogenic plate morphogenesis;GO:0042074|cell migration involved in gastrulation;GO:0061009|common bile duct development;GO:0048617|embryonic foregut morphogenesis;GO:0035050|embryonic heart tube development;GO:0003143|embryonic heart tube morphogenesis;GO:0048568|embryonic o…	GO:0044798|nuclear transcription factor complex;GO:0005634|nucleus;GO:0005667|transcription factor complex;	GO:0008013|beta-catenin binding;GO:0003677|DNA binding;GO:0046982|protein heterodimerization activity;GO:0000981|RNA polymerase II transcription factor activity, sequence-specific DNA binding;GO:0043565|sequence-specific DNA binding;GO:0003713|transcription coactivator activity;GO:0003705|transcription factor activity, RNA polymerase II distal enhancer sequence-specific binding;GO:0003700|transcr…	K04495	SOX17; transcription factor SOX17 (SOX group F)
chr1	4492099	4493768	1670	4492353	44	12.3021	3.39702	7.9028	3_peak_1a	chr1	4492464	4492668	Exon	ENSMUSG00000025902	Sox17	gi|148682294|gb|EDL14241.1|	1753	0	SRY-box containing gene 17, isoform CRA_b, partial [Mus musculus]	gi|575501716|ref|NM_001289465.1|	3242	0	Mus musculus SRY (sex determining region Y)-box 17 (Sox17), transcript variant 3, mRNA	Q61473	308	1e-97	Transcription factor SOX-17	SPAC57A10.09c	54.7	9e-08	COG5648	pfam12067	Sox_C_TAD	Sox C-terminal transactivation domain. This domain is found at the C-terminus of the Sox family of transcription factors. It is found associated with pfam00505. It binds to the Armadillo repeats (pfam00514) in Catenin beta-1 (CTNNB1), which is involved in transcriptional regulation. It functions as a transactivating domain (TAD).	GO:0001525|angiogenesis;GO:0060070|canonical Wnt signaling pathway;GO:0060913|cardiac cell fate determination;GO:0003142|cardiogenic plate morphogenesis;GO:0042074|cell migration involved in gastrulation;GO:0061009|common bile duct development;GO:0048617|embryonic foregut morphogenesis;GO:0035050|embryonic heart tube development;GO:0003143|embryonic heart tube morphogenesis;GO:0048568|embryonic o…	GO:0044798|nuclear transcription factor complex;GO:0005634|nucleus;GO:0005667|transcription factor complex;	GO:0008013|beta-catenin binding;GO:0003677|DNA binding;GO:0046982|protein heterodimerization activity;GO:0000981|RNA polymerase II transcription factor activity, sequence-specific DNA binding;GO:0043565|sequence-specific DNA binding;GO:0003713|transcription coactivator activity;GO:0003705|transcription factor activity, RNA polymerase II distal enhancer sequence-specific binding;GO:0003700|transcr…	K04495	SOX17; transcription factor SOX17 (SOX group F)
chr1	4492099	4493768	1670	4492353	44	12.3021	3.39702	7.9028	3_peak_1a	chr1	4492466	4492668	Exon	ENSMUSG00000025902	Sox17	gi|148682294|gb|EDL14241.1|	1753	0	SRY-box containing gene 17, isoform CRA_b, partial [Mus musculus]	gi|575501716|ref|NM_001289465.1|	3242	0	Mus musculus SRY (sex determining region Y)-box 17 (Sox17), transcript variant 3, mRNA	Q61473	308	1e-97	Transcription factor SOX-17	SPAC57A10.09c	54.7	9e-08	COG5648	pfam12067	Sox_C_TAD	Sox C-terminal transactivation domain. This domain is found at the C-terminus of the Sox family of transcription factors. It is found associated with pfam00505. It binds to the Armadillo repeats (pfam00514) in Catenin beta-1 (CTNNB1), which is involved in transcriptional regulation. It functions as a transactivating domain (TAD).	GO:0001525|angiogenesis;GO:0060070|canonical Wnt signaling pathway;GO:0060913|cardiac cell fate determination;GO:0003142|cardiogenic plate morphogenesis;GO:0042074|cell migration involved in gastrulation;GO:0061009|common bile duct development;GO:0048617|embryonic foregut morphogenesis;GO:0035050|embryonic heart tube development;GO:0003143|embryonic heart tube morphogenesis;GO:0048568|embryonic o…	GO:0044798|nuclear transcription factor complex;GO:0005634|nucleus;GO:0005667|transcription factor complex;	GO:0008013|beta-catenin binding;GO:0003677|DNA binding;GO:0046982|protein heterodimerization activity;GO:0000981|RNA polymerase II transcription factor activity, sequence-specific DNA binding;GO:0043565|sequence-specific DNA binding;GO:0003713|transcription coactivator activity;GO:0003705|transcription factor activity, RNA polymerase II distal enhancer sequence-specific binding;GO:0003700|transcr…	K04495	SOX17; transcription factor SOX17 (SOX group F)
chr1	4492099	4493768	1670	4492353	44	12.3021	3.39702	7.9028	3_peak_1a	chr1	4493099	4493735	Exon	ENSMUSG00000025902	Sox17	gi|148682294|gb|EDL14241.1|	1753	0	SRY-box containing gene 17, isoform CRA_b, partial [Mus musculus]	gi|575501716|ref|NM_001289465.1|	3242	0	Mus musculus SRY (sex determining region Y)-box 17 (Sox17), transcript variant 3, mRNA	Q61473	308	1e-97	Transcription factor SOX-17	SPAC57A10.09c	54.7	9e-08	COG5648	pfam12067	Sox_C_TAD	Sox C-terminal transactivation domain. This domain is found at the C-terminus of the Sox family of transcription factors. It is found associated with pfam00505. It binds to the Armadillo repeats (pfam00514) in Catenin beta-1 (CTNNB1), which is involved in transcriptional regulation. It functions as a transactivating domain (TAD).	GO:0001525|angiogenesis;GO:0060070|canonical Wnt signaling pathway;GO:0060913|cardiac cell fate determination;GO:0003142|cardiogenic plate morphogenesis;GO:0042074|cell migration involved in gastrulation;GO:0061009|common bile duct development;GO:0048617|embryonic foregut morphogenesis;GO:0035050|embryonic heart tube development;GO:0003143|embryonic heart tube morphogenesis;GO:0048568|embryonic o…	GO:0044798|nuclear transcription factor complex;GO:0005634|nucleus;GO:0005667|transcription factor complex;	GO:0008013|beta-catenin binding;GO:0003677|DNA binding;GO:0046982|protein heterodimerization activity;GO:0000981|RNA polymerase II transcription factor activity, sequence-specific DNA binding;GO:0043565|sequence-specific DNA binding;GO:0003713|transcription coactivator activity;GO:0003705|transcription factor activity, RNA polymerase II distal enhancer sequence-specific binding;GO:0003700|transcr…	K04495	SOX17; transcription factor SOX17 (SOX group F)
chr1	4492099	4493768	1670	4492353	44	12.3021	3.39702	7.9028	3_peak_1a	chr1	4493099	4493466	Exon	ENSMUSG00000025902	Sox17	gi|148682294|gb|EDL14241.1|	1753	0	SRY-box containing gene 17, isoform CRA_b, partial [Mus musculus]	gi|575501716|ref|NM_001289465.1|	3242	0	Mus musculus SRY (sex determining region Y)-box 17 (Sox17), transcript variant 3, mRNA	Q61473	308	1e-97	Transcription factor SOX-17	SPAC57A10.09c	54.7	9e-08	COG5648	pfam12067	Sox_C_TAD	Sox C-terminal transactivation domain. This domain is found at the C-terminus of the Sox family of transcription factors. It is found associated with pfam00505. It binds to the Armadillo repeats (pfam00514) in Catenin beta-1 (CTNNB1), which is involved in transcriptional regulation. It functions as a transactivating domain (TAD).	GO:0001525|angiogenesis;GO:0060070|canonical Wnt signaling pathway;GO:0060913|cardiac cell fate determination;GO:0003142|cardiogenic plate morphogenesis;GO:0042074|cell migration involved in gastrulation;GO:0061009|common bile duct development;GO:0048617|embryonic foregut morphogenesis;GO:0035050|embryonic heart tube development;GO:0003143|embryonic heart tube morphogenesis;GO:0048568|embryonic o…	GO:0044798|nuclear transcription factor complex;GO:0005634|nucleus;GO:0005667|transcription factor complex;	GO:0008013|beta-catenin binding;GO:0003677|DNA binding;GO:0046982|protein heterodimerization activity;GO:0000981|RNA polymerase II transcription factor activity, sequence-specific DNA binding;GO:0043565|sequence-specific DNA binding;GO:0003713|transcription coactivator activity;GO:0003705|transcription factor activity, RNA polymerase II distal enhancer sequence-specific binding;GO:0003700|transcr…	K04495	SOX17; transcription factor SOX17 (SOX group F)
chr1	4492099	4493768	1670	4492353	44	12.3021	3.39702	7.9028	3_peak_1a	chr1	4493099	4493490	Exon	ENSMUSG00000025902	Sox17	gi|148682294|gb|EDL14241.1|	1753	0	SRY-box containing gene 17, isoform CRA_b, partial [Mus musculus]	gi|575501716|ref|NM_001289465.1|	3242	0	Mus musculus SRY (sex determining region Y)-box 17 (Sox17), transcript variant 3, mRNA	Q61473	308	1e-97	Transcription factor SOX-17	SPAC57A10.09c	54.7	9e-08	COG5648	pfam12067	Sox_C_TAD	Sox C-terminal transactivation domain. This domain is found at the C-terminus of the Sox family of transcription factors. It is found associated with pfam00505. It binds to the Armadillo repeats (pfam00514) in Catenin beta-1 (CTNNB1), which is involved in transcriptional regulation. It functions as a transactivating domain (TAD).	GO:0001525|angiogenesis;GO:0060070|canonical Wnt signaling pathway;GO:0060913|cardiac cell fate determination;GO:0003142|cardiogenic plate morphogenesis;GO:0042074|cell migration involved in gastrulation;GO:0061009|common bile duct development;GO:0048617|embryonic foregut morphogenesis;GO:0035050|embryonic heart tube development;GO:0003143|embryonic heart tube morphogenesis;GO:0048568|embryonic o…	GO:0044798|nuclear transcription factor complex;GO:0005634|nucleus;GO:0005667|transcription factor complex;	GO:0008013|beta-catenin binding;GO:0003677|DNA binding;GO:0046982|protein heterodimerization activity;GO:0000981|RNA polymerase II transcription factor activity, sequence-specific DNA binding;GO:0043565|sequence-specific DNA binding;GO:0003713|transcription coactivator activity;GO:0003705|transcription factor activity, RNA polymerase II distal enhancer sequence-specific binding;GO:0003700|transcr…	K04495	SOX17; transcription factor SOX17 (SOX group F)
chr1	4492099	4493768	1670	4492353	44	12.3021	3.39702	7.9028	3_peak_1a	chr1	4493767	4493863	Exon	ENSMUSG00000025902	Sox17	gi|148682294|gb|EDL14241.1|	1753	0	SRY-box containing gene 17, isoform CRA_b, partial [Mus musculus]	gi|575501716|ref|NM_001289465.1|	3242	0	Mus musculus SRY (sex determining region Y)-box 17 (Sox17), transcript variant 3, mRNA	Q61473	308	1e-97	Transcription factor SOX-17	SPAC57A10.09c	54.7	9e-08	COG5648	pfam12067	Sox_C_TAD	Sox C-terminal transactivation domain. This domain is found at the C-terminus of the Sox family of transcription factors. It is found associated with pfam00505. It binds to the Armadillo repeats (pfam00514) in Catenin beta-1 (CTNNB1), which is involved in transcriptional regulation. It functions as a transactivating domain (TAD).	GO:0001525|angiogenesis;GO:0060070|canonical Wnt signaling pathway;GO:0060913|cardiac cell fate determination;GO:0003142|cardiogenic plate morphogenesis;GO:0042074|cell migration involved in gastrulation;GO:0061009|common bile duct development;GO:0048617|embryonic foregut morphogenesis;GO:0035050|embryonic heart tube development;GO:0003143|embryonic heart tube morphogenesis;GO:0048568|embryonic o…	GO:0044798|nuclear transcription factor complex;GO:0005634|nucleus;GO:0005667|transcription factor complex;	GO:0008013|beta-catenin binding;GO:0003677|DNA binding;GO:0046982|protein heterodimerization activity;GO:0000981|RNA polymerase II transcription factor activity, sequence-specific DNA binding;GO:0043565|sequence-specific DNA binding;GO:0003713|transcription coactivator activity;GO:0003705|transcription factor activity, RNA polymerase II distal enhancer sequence-specific binding;GO:0003700|transcr…	K04495	SOX17; transcription factor SOX17 (SOX group F)
chr1	4492099	4493768	1670	4492353	44	12.3021	3.39702	7.9028	3_peak_1a	chr1	4492663	4493767	Intron	ENSMUSG00000025902	Sox17	gi|148682294|gb|EDL14241.1|	1753	0	SRY-box containing gene 17, isoform CRA_b, partial [Mus musculus]	gi|575501716|ref|NM_001289465.1|	3242	0	Mus musculus SRY (sex determining region Y)-box 17 (Sox17), transcript variant 3, mRNA	Q61473	308	1e-97	Transcription factor SOX-17	SPAC57A10.09c	54.7	9e-08	COG5648	pfam12067	Sox_C_TAD	Sox C-terminal transactivation domain. This domain is found at the C-terminus of the Sox family of transcription factors. It is found associated with pfam00505. It binds to the Armadillo repeats (pfam00514) in Catenin beta-1 (CTNNB1), which is involved in transcriptional regulation. It functions as a transactivating domain (TAD).	GO:0001525|angiogenesis;GO:0060070|canonical Wnt signaling pathway;GO:0060913|cardiac cell fate determination;GO:0003142|cardiogenic plate morphogenesis;GO:0042074|cell migration involved in gastrulation;GO:0061009|common bile duct development;GO:0048617|embryonic foregut morphogenesis;GO:0035050|embryonic heart tube development;GO:0003143|embryonic heart tube morphogenesis;GO:0048568|embryonic o…	GO:0044798|nuclear transcription factor complex;GO:0005634|nucleus;GO:0005667|transcription factor complex;	GO:0008013|beta-catenin binding;GO:0003677|DNA binding;GO:0046982|protein heterodimerization activity;GO:0000981|RNA polymerase II transcription factor activity, sequence-specific DNA binding;GO:0043565|sequence-specific DNA binding;GO:0003713|transcription coactivator activity;GO:0003705|transcription factor activity, RNA polymerase II distal enhancer sequence-specific binding;GO:0003700|transcr…	K04495	SOX17; transcription factor SOX17 (SOX group F)
chr1	4492099	4493768	1670	4492353	44	12.3021	3.39702	7.9028	3_peak_1a	chr1	4492668	4493099	Intron	ENSMUSG00000025902	Sox17	gi|148682294|gb|EDL14241.1|	1753	0	SRY-box containing gene 17, isoform CRA_b, partial [Mus musculus]	gi|575501716|ref|NM_001289465.1|	3242	0	Mus musculus SRY (sex determining region Y)-box 17 (Sox17), transcript variant 3, mRNA	Q61473	308	1e-97	Transcription factor SOX-17	SPAC57A10.09c	54.7	9e-08	COG5648	pfam12067	Sox_C_TAD	Sox C-terminal transactivation domain. This domain is found at the C-terminus of the Sox family of transcription factors. It is found associated with pfam00505. It binds to the Armadillo repeats (pfam00514) in Catenin beta-1 (CTNNB1), which is involved in transcriptional regulation. It functions as a transactivating domain (TAD).	GO:0001525|angiogenesis;GO:0060070|canonical Wnt signaling pathway;GO:0060913|cardiac cell fate determination;GO:0003142|cardiogenic plate morphogenesis;GO:0042074|cell migration involved in gastrulation;GO:0061009|common bile duct development;GO:0048617|embryonic foregut morphogenesis;GO:0035050|embryonic heart tube development;GO:0003143|embryonic heart tube morphogenesis;GO:0048568|embryonic o…	GO:0044798|nuclear transcription factor complex;GO:0005634|nucleus;GO:0005667|transcription factor complex;	GO:0008013|beta-catenin binding;GO:0003677|DNA binding;GO:0046982|protein heterodimerization activity;GO:0000981|RNA polymerase II transcription factor activity, sequence-specific DNA binding;GO:0043565|sequence-specific DNA binding;GO:0003713|transcription coactivator activity;GO:0003705|transcription factor activity, RNA polymerase II distal enhancer sequence-specific binding;GO:0003700|transcr…	K04495	SOX17; transcription factor SOX17 (SOX group F)
chr1	4492099	4493768	1670	4492353	44	12.3021	3.39702	7.9028	3_peak_1a	chr1	4492668	4493771	Intron	ENSMUSG00000025902	Sox17	gi|148682294|gb|EDL14241.1|	1753	0	SRY-box containing gene 17, isoform CRA_b, partial [Mus musculus]	gi|575501716|ref|NM_001289465.1|	3242	0	Mus musculus SRY (sex determining region Y)-box 17 (Sox17), transcript variant 3, mRNA	Q61473	308	1e-97	Transcription factor SOX-17	SPAC57A10.09c	54.7	9e-08	COG5648	pfam12067	Sox_C_TAD	Sox C-terminal transactivation domain. This domain is found at the C-terminus of the Sox family of transcription factors. It is found associated with pfam00505. It binds to the Armadillo repeats (pfam00514) in Catenin beta-1 (CTNNB1), which is involved in transcriptional regulation. It functions as a transactivating domain (TAD).	GO:0001525|angiogenesis;GO:0060070|canonical Wnt signaling pathway;GO:0060913|cardiac cell fate determination;GO:0003142|cardiogenic plate morphogenesis;GO:0042074|cell migration involved in gastrulation;GO:0061009|common bile duct development;GO:0048617|embryonic foregut morphogenesis;GO:0035050|embryonic heart tube development;GO:0003143|embryonic heart tube morphogenesis;GO:0048568|embryonic o…	GO:0044798|nuclear transcription factor complex;GO:0005634|nucleus;GO:0005667|transcription factor complex;	GO:0008013|beta-catenin binding;GO:0003677|DNA binding;GO:0046982|protein heterodimerization activity;GO:0000981|RNA polymerase II transcription factor activity, sequence-specific DNA binding;GO:0043565|sequence-specific DNA binding;GO:0003713|transcription coactivator activity;GO:0003705|transcription factor activity, RNA polymerase II distal enhancer sequence-specific binding;GO:0003700|transcr…	K04495	SOX17; transcription factor SOX17 (SOX group F)
chr1	4492099	4493768	1670	4492353	44	12.3021	3.39702	7.9028	3_peak_1a	chr1	4493466	4493771	Intron	ENSMUSG00000025902	Sox17	gi|148682294|gb|EDL14241.1|	1753	0	SRY-box containing gene 17, isoform CRA_b, partial [Mus musculus]	gi|575501716|ref|NM_001289465.1|	3242	0	Mus musculus SRY (sex determining region Y)-box 17 (Sox17), transcript variant 3, mRNA	Q61473	308	1e-97	Transcription factor SOX-17	SPAC57A10.09c	54.7	9e-08	COG5648	pfam12067	Sox_C_TAD	Sox C-terminal transactivation domain. This domain is found at the C-terminus of the Sox family of transcription factors. It is found associated with pfam00505. It binds to the Armadillo repeats (pfam00514) in Catenin beta-1 (CTNNB1), which is involved in transcriptional regulation. It functions as a transactivating domain (TAD).	GO:0001525|angiogenesis;GO:0060070|canonical Wnt signaling pathway;GO:0060913|cardiac cell fate determination;GO:0003142|cardiogenic plate morphogenesis;GO:0042074|cell migration involved in gastrulation;GO:0061009|common bile duct development;GO:0048617|embryonic foregut morphogenesis;GO:0035050|embryonic heart tube development;GO:0003143|embryonic heart tube morphogenesis;GO:0048568|embryonic o…	GO:0044798|nuclear transcription factor complex;GO:0005634|nucleus;GO:0005667|transcription factor complex;	GO:0008013|beta-catenin binding;GO:0003677|DNA binding;GO:0046982|protein heterodimerization activity;GO:0000981|RNA polymerase II transcription factor activity, sequence-specific DNA binding;GO:0043565|sequence-specific DNA binding;GO:0003713|transcription coactivator activity;GO:0003705|transcription factor activity, RNA polymerase II distal enhancer sequence-specific binding;GO:0003700|transcr…	K04495	SOX17; transcription factor SOX17 (SOX group F)
chr1	4492099	4493768	1670	4492353	44	12.3021	3.39702	7.9028	3_peak_1a	chr1	4493490	4493771	Intron	ENSMUSG00000025902	Sox17	gi|148682294|gb|EDL14241.1|	1753	0	SRY-box containing gene 17, isoform CRA_b, partial [Mus musculus]	gi|575501716|ref|NM_001289465.1|	3242	0	Mus musculus SRY (sex determining region Y)-box 17 (Sox17), transcript variant 3, mRNA	Q61473	308	1e-97	Transcription factor SOX-17	SPAC57A10.09c	54.7	9e-08	COG5648	pfam12067	Sox_C_TAD	Sox C-terminal transactivation domain. This domain is found at the C-terminus of the Sox family of transcription factors. It is found associated with pfam00505. It binds to the Armadillo repeats (pfam00514) in Catenin beta-1 (CTNNB1), which is involved in transcriptional regulation. It functions as a transactivating domain (TAD).	GO:0001525|angiogenesis;GO:0060070|canonical Wnt signaling pathway;GO:0060913|cardiac cell fate determination;GO:0003142|cardiogenic plate morphogenesis;GO:0042074|cell migration involved in gastrulation;GO:0061009|common bile duct development;GO:0048617|embryonic foregut morphogenesis;GO:0035050|embryonic heart tube development;GO:0003143|embryonic heart tube morphogenesis;GO:0048568|embryonic o…	GO:0044798|nuclear transcription factor complex;GO:0005634|nucleus;GO:0005667|transcription factor complex;	GO:0008013|beta-catenin binding;GO:0003677|DNA binding;GO:0046982|protein heterodimerization activity;GO:0000981|RNA polymerase II transcription factor activity, sequence-specific DNA binding;GO:0043565|sequence-specific DNA binding;GO:0003713|transcription coactivator activity;GO:0003705|transcription factor activity, RNA polymerase II distal enhancer sequence-specific binding;GO:0003700|transcr…	K04495	SOX17; transcription factor SOX17 (SOX group F)
chr1	4492099	4493768	1670	4492353	44	12.3021	3.39702	7.9028	3_peak_1a	chr1	4493490	4495135	Intron	ENSMUSG00000025902	Sox17	gi|148682294|gb|EDL14241.1|	1753	0	SRY-box containing gene 17, isoform CRA_b, partial [Mus musculus]	gi|575501716|ref|NM_001289465.1|	3242	0	Mus musculus SRY (sex determining region Y)-box 17 (Sox17), transcript variant 3, mRNA	Q61473	308	1e-97	Transcription factor SOX-17	SPAC57A10.09c	54.7	9e-08	COG5648	pfam12067	Sox_C_TAD	Sox C-terminal transactivation domain. This domain is found at the C-terminus of the Sox family of transcription factors. It is found associated with pfam00505. It binds to the Armadillo repeats (pfam00514) in Catenin beta-1 (CTNNB1), which is involved in transcriptional regulation. It functions as a transactivating domain (TAD).	GO:0001525|angiogenesis;GO:0060070|canonical Wnt signaling pathway;GO:0060913|cardiac cell fate determination;GO:0003142|cardiogenic plate morphogenesis;GO:0042074|cell migration involved in gastrulation;GO:0061009|common bile duct development;GO:0048617|embryonic foregut morphogenesis;GO:0035050|embryonic heart tube development;GO:0003143|embryonic heart tube morphogenesis;GO:0048568|embryonic o…	GO:0044798|nuclear transcription factor complex;GO:0005634|nucleus;GO:0005667|transcription factor complex;	GO:0008013|beta-catenin binding;GO:0003677|DNA binding;GO:0046982|protein heterodimerization activity;GO:0000981|RNA polymerase II transcription factor activity, sequence-specific DNA binding;GO:0043565|sequence-specific DNA binding;GO:0003713|transcription coactivator activity;GO:0003705|transcription factor activity, RNA polymerase II distal enhancer sequence-specific binding;GO:0003700|transcr…	K04495	SOX17; transcription factor SOX17 (SOX group F)
chr1	4492099	4493768	1670	4492353	44	12.3021	3.39702	7.9028	3_peak_1a	chr1	4493604	4495604	Upstream2k	ENSMUSG00000025902	Sox17	gi|148682294|gb|EDL14241.1|	1753	0	SRY-box containing gene 17, isoform CRA_b, partial [Mus musculus]	gi|575501716|ref|NM_001289465.1|	3242	0	Mus musculus SRY (sex determining region Y)-box 17 (Sox17), transcript variant 3, mRNA	Q61473	308	1e-97	Transcription factor SOX-17	SPAC57A10.09c	54.7	9e-08	COG5648	pfam12067	Sox_C_TAD	Sox C-terminal transactivation domain. This domain is found at the C-terminus of the Sox family of transcription factors. It is found associated with pfam00505. It binds to the Armadillo repeats (pfam00514) in Catenin beta-1 (CTNNB1), which is involved in transcriptional regulation. It functions as a transactivating domain (TAD).	GO:0001525|angiogenesis;GO:0060070|canonical Wnt signaling pathway;GO:0060913|cardiac cell fate determination;GO:0003142|cardiogenic plate morphogenesis;GO:0042074|cell migration involved in gastrulation;GO:0061009|common bile duct development;GO:0048617|embryonic foregut morphogenesis;GO:0035050|embryonic heart tube development;GO:0003143|embryonic heart tube morphogenesis;GO:0048568|embryonic o…	GO:0044798|nuclear transcription factor complex;GO:0005634|nucleus;GO:0005667|transcription factor complex;	GO:0008013|beta-catenin binding;GO:0003677|DNA binding;GO:0046982|protein heterodimerization activity;GO:0000981|RNA polymerase II transcription factor activity, sequence-specific DNA binding;GO:0043565|sequence-specific DNA binding;GO:0003713|transcription coactivator activity;GO:0003705|transcription factor activity, RNA polymerase II distal enhancer sequence-specific binding;GO:0003700|transcr…	K04495	SOX17; transcription factor SOX17 (SOX group F)
chr1	4492099	4493768	1670	4492353	44	12.3021	3.39702	7.9028	3_peak_1a	chr1	4493735	4495735	Upstream2k	ENSMUSG00000025902	Sox17	gi|148682294|gb|EDL14241.1|	1753	0	SRY-box containing gene 17, isoform CRA_b, partial [Mus musculus]	gi|575501716|ref|NM_001289465.1|	3242	0	Mus musculus SRY (sex determining region Y)-box 17 (Sox17), transcript variant 3, mRNA	Q61473	308	1e-97	Transcription factor SOX-17	SPAC57A10.09c	54.7	9e-08	COG5648	pfam12067	Sox_C_TAD	Sox C-terminal transactivation domain. This domain is found at the C-terminus of the Sox family of transcription factors. It is found associated with pfam00505. It binds to the Armadillo repeats (pfam00514) in Catenin beta-1 (CTNNB1), which is involved in transcriptional regulation. It functions as a transactivating domain (TAD).	GO:0001525|angiogenesis;GO:0060070|canonical Wnt signaling pathway;GO:0060913|cardiac cell fate determination;GO:0003142|cardiogenic plate morphogenesis;GO:0042074|cell migration involved in gastrulation;GO:0061009|common bile duct development;GO:0048617|embryonic foregut morphogenesis;GO:0035050|embryonic heart tube development;GO:0003143|embryonic heart tube morphogenesis;GO:0048568|embryonic o…	GO:0044798|nuclear transcription factor complex;GO:0005634|nucleus;GO:0005667|transcription factor complex;	GO:0008013|beta-catenin binding;GO:0003677|DNA binding;GO:0046982|protein heterodimerization activity;GO:0000981|RNA polymerase II transcription factor activity, sequence-specific DNA binding;GO:0043565|sequence-specific DNA binding;GO:0003713|transcription coactivator activity;GO:0003705|transcription factor activity, RNA polymerase II distal enhancer sequence-specific binding;GO:0003700|transcr…	K04495	SOX17; transcription factor SOX17 (SOX group F)
chr1	4492099	4493768	1670	4492353	44	12.3021	3.39702	7.9028	3_peak_1a	chr1	4492591	4492663	UTR5	ENSMUSG00000025902	Sox17	gi|148682294|gb|EDL14241.1|	1753	0	SRY-box containing gene 17, isoform CRA_b, partial [Mus musculus]	gi|575501716|ref|NM_001289465.1|	3242	0	Mus musculus SRY (sex determining region Y)-box 17 (Sox17), transcript variant 3, mRNA	Q61473	308	1e-97	Transcription factor SOX-17	SPAC57A10.09c	54.7	9e-08	COG5648	pfam12067	Sox_C_TAD	Sox C-terminal transactivation domain. This domain is found at the C-terminus of the Sox family of transcription factors. It is found associated with pfam00505. It binds to the Armadillo repeats (pfam00514) in Catenin beta-1 (CTNNB1), which is involved in transcriptional regulation. It functions as a transactivating domain (TAD).	GO:0001525|angiogenesis;GO:0060070|canonical Wnt signaling pathway;GO:0060913|cardiac cell fate determination;GO:0003142|cardiogenic plate morphogenesis;GO:0042074|cell migration involved in gastrulation;GO:0061009|common bile duct development;GO:0048617|embryonic foregut morphogenesis;GO:0035050|embryonic heart tube development;GO:0003143|embryonic heart tube morphogenesis;GO:0048568|embryonic o…	GO:0044798|nuclear transcription factor complex;GO:0005634|nucleus;GO:0005667|transcription factor complex;	GO:0008013|beta-catenin binding;GO:0003677|DNA binding;GO:0046982|protein heterodimerization activity;GO:0000981|RNA polymerase II transcription factor activity, sequence-specific DNA binding;GO:0043565|sequence-specific DNA binding;GO:0003713|transcription coactivator activity;GO:0003705|transcription factor activity, RNA polymerase II distal enhancer sequence-specific binding;GO:0003700|transcr…	K04495	SOX17; transcription factor SOX17 (SOX group F)
chr1	4492099	4493768	1670	4492353	44	12.3021	3.39702	7.9028	3_peak_1a	chr1	4493406	4493466	UTR5	ENSMUSG00000025902	Sox17	gi|148682294|gb|EDL14241.1|	1753	0	SRY-box containing gene 17, isoform CRA_b, partial [Mus musculus]	gi|575501716|ref|NM_001289465.1|	3242	0	Mus musculus SRY (sex determining region Y)-box 17 (Sox17), transcript variant 3, mRNA	Q61473	308	1e-97	Transcription factor SOX-17	SPAC57A10.09c	54.7	9e-08	COG5648	pfam12067	Sox_C_TAD	Sox C-terminal transactivation domain. This domain is found at the C-terminus of the Sox family of transcription factors. It is found associated with pfam00505. It binds to the Armadillo repeats (pfam00514) in Catenin beta-1 (CTNNB1), which is involved in transcriptional regulation. It functions as a transactivating domain (TAD).	GO:0001525|angiogenesis;GO:0060070|canonical Wnt signaling pathway;GO:0060913|cardiac cell fate determination;GO:0003142|cardiogenic plate morphogenesis;GO:0042074|cell migration involved in gastrulation;GO:0061009|common bile duct development;GO:0048617|embryonic foregut morphogenesis;GO:0035050|embryonic heart tube development;GO:0003143|embryonic heart tube morphogenesis;GO:0048568|embryonic o…	GO:0044798|nuclear transcription factor complex;GO:0005634|nucleus;GO:0005667|transcription factor complex;	GO:0008013|beta-catenin binding;GO:0003677|DNA binding;GO:0046982|protein heterodimerization activity;GO:0000981|RNA polymerase II transcription factor activity, sequence-specific DNA binding;GO:0043565|sequence-specific DNA binding;GO:0003713|transcription coactivator activity;GO:0003705|transcription factor activity, RNA polymerase II distal enhancer sequence-specific binding;GO:0003700|transcr…	K04495	SOX17; transcription factor SOX17 (SOX group F)
chr1	4492099	4493768	1670	4492353	44	12.3021	3.39702	7.9028	3_peak_1a	chr1	4493406	4493490	UTR5	ENSMUSG00000025902	Sox17	gi|148682294|gb|EDL14241.1|	1753	0	SRY-box containing gene 17, isoform CRA_b, partial [Mus musculus]	gi|575501716|ref|NM_001289465.1|	3242	0	Mus musculus SRY (sex determining region Y)-box 17 (Sox17), transcript variant 3, mRNA	Q61473	308	1e-97	Transcription factor SOX-17	SPAC57A10.09c	54.7	9e-08	COG5648	pfam12067	Sox_C_TAD	Sox C-terminal transactivation domain. This domain is found at the C-terminus of the Sox family of transcription factors. It is found associated with pfam00505. It binds to the Armadillo repeats (pfam00514) in Catenin beta-1 (CTNNB1), which is involved in transcriptional regulation. It functions as a transactivating domain (TAD).	GO:0001525|angiogenesis;GO:0060070|canonical Wnt signaling pathway;GO:0060913|cardiac cell fate determination;GO:0003142|cardiogenic plate morphogenesis;GO:0042074|cell migration involved in gastrulation;GO:0061009|common bile duct development;GO:0048617|embryonic foregut morphogenesis;GO:0035050|embryonic heart tube development;GO:0003143|embryonic heart tube morphogenesis;GO:0048568|embryonic o…	GO:0044798|nuclear transcription factor complex;GO:0005634|nucleus;GO:0005667|transcription factor complex;	GO:0008013|beta-catenin binding;GO:0003677|DNA binding;GO:0046982|protein heterodimerization activity;GO:0000981|RNA polymerase II transcription factor activity, sequence-specific DNA binding;GO:0043565|sequence-specific DNA binding;GO:0003713|transcription coactivator activity;GO:0003705|transcription factor activity, RNA polymerase II distal enhancer sequence-specific binding;GO:0003700|transcr…	K04495	SOX17; transcription factor SOX17 (SOX group F)
chr1	4492099	4493768	1670	4492353	44	12.3021	3.39702	7.9028	3_peak_1a	chr1	4493406	4493735	UTR5	ENSMUSG00000025902	Sox17	gi|148682294|gb|EDL14241.1|	1753	0	SRY-box containing gene 17, isoform CRA_b, partial [Mus musculus]	gi|575501716|ref|NM_001289465.1|	3242	0	Mus musculus SRY (sex determining region Y)-box 17 (Sox17), transcript variant 3, mRNA	Q61473	308	1e-97	Transcription factor SOX-17	SPAC57A10.09c	54.7	9e-08	COG5648	pfam12067	Sox_C_TAD	Sox C-terminal transactivation domain. This domain is found at the C-terminus of the Sox family of transcription factors. It is found associated with pfam00505. It binds to the Armadillo repeats (pfam00514) in Catenin beta-1 (CTNNB1), which is involved in transcriptional regulation. It functions as a transactivating domain (TAD).	GO:0001525|angiogenesis;GO:0060070|canonical Wnt signaling pathway;GO:0060913|cardiac cell fate determination;GO:0003142|cardiogenic plate morphogenesis;GO:0042074|cell migration involved in gastrulation;GO:0061009|common bile duct development;GO:0048617|embryonic foregut morphogenesis;GO:0035050|embryonic heart tube development;GO:0003143|embryonic heart tube morphogenesis;GO:0048568|embryonic o…	GO:0044798|nuclear transcription factor complex;GO:0005634|nucleus;GO:0005667|transcription factor complex;	GO:0008013|beta-catenin binding;GO:0003677|DNA binding;GO:0046982|protein heterodimerization activity;GO:0000981|RNA polymerase II transcription factor activity, sequence-specific DNA binding;GO:0043565|sequence-specific DNA binding;GO:0003713|transcription coactivator activity;GO:0003705|transcription factor activity, RNA polymerase II distal enhancer sequence-specific binding;GO:0003700|transcr…	K04495	SOX17; transcription factor SOX17 (SOX group F)
chr1	4492099	4493768	1670	4492353	44	12.3021	3.39702	7.9028	3_peak_1a	chr1	4493767	4493863	UTR5	ENSMUSG00000025902	Sox17	gi|148682294|gb|EDL14241.1|	1753	0	SRY-box containing gene 17, isoform CRA_b, partial [Mus musculus]	gi|575501716|ref|NM_001289465.1|	3242	0	Mus musculus SRY (sex determining region Y)-box 17 (Sox17), transcript variant 3, mRNA	Q61473	308	1e-97	Transcription factor SOX-17	SPAC57A10.09c	54.7	9e-08	COG5648	pfam12067	Sox_C_TAD	Sox C-terminal transactivation domain. This domain is found at the C-terminus of the Sox family of transcription factors. It is found associated with pfam00505. It binds to the Armadillo repeats (pfam00514) in Catenin beta-1 (CTNNB1), which is involved in transcriptional regulation. It functions as a transactivating domain (TAD).	GO:0001525|angiogenesis;GO:0060070|canonical Wnt signaling pathway;GO:0060913|cardiac cell fate determination;GO:0003142|cardiogenic plate morphogenesis;GO:0042074|cell migration involved in gastrulation;GO:0061009|common bile duct development;GO:0048617|embryonic foregut morphogenesis;GO:0035050|embryonic heart tube development;GO:0003143|embryonic heart tube morphogenesis;GO:0048568|embryonic o…	GO:0044798|nuclear transcription factor complex;GO:0005634|nucleus;GO:0005667|transcription factor complex;	GO:0008013|beta-catenin binding;GO:0003677|DNA binding;GO:0046982|protein heterodimerization activity;GO:0000981|RNA polymerase II transcription factor activity, sequence-specific DNA binding;GO:0043565|sequence-specific DNA binding;GO:0003713|transcription coactivator activity;GO:0003705|transcription factor activity, RNA polymerase II distal enhancer sequence-specific binding;GO:0003700|transcr…	K04495	SOX17; transcription factor SOX17 (SOX group F)
chr7	103867062	103867647	586	103867155	10	5.46259	3.90209	2.18454	3_peak_2293	-//-	-//-	-//-	--//--
chr14	12821868	12822674	807	12821991	22	9.72227	4.38131	5.61954	3_peak_693	chr14	12822303	12823079	Exon	ENSMUSG00000054423	Cadps	gi|70906474|ref|NP_036191.2|	6471	0	calcium-dependent secretion activator 1 isoform 1 [Mus musculus]	gi|50927183|gb|BC079679.1|	7854	0	Mus musculus Ca2+-dependent secretion activator, mRNA (cDNA clone IMAGE:30537768), with apparent retained intron	Q62717	139	6e-37	Calcium-dependent secretion activator 1	.	.	.	.	pfam06292	DUF1041	Domain of Unknown Function (DUF1041). This family consists of several eukaryotic domains of unknown function. Members of this family are often found in tandem repeats and co-occur with pfam00168, pfam00130 and pfam00169 domains.	GO:0050432|catecholamine secretion;GO:1990504|dense core granule exocytosis;GO:0006887|exocytosis;GO:0015031|protein transport;GO:0016082|synaptic vesicle priming;GO:0016050|vesicle organization;	GO:0030054|cell junction;GO:0030659|cytoplasmic vesicle membrane;GO:0005829|cytosol;GO:0098793|presynapse;	GO:0008289|lipid binding;GO:0046872|metal ion binding;GO:0019901|protein kinase binding;	.	.
chr14	12821868	12822674	807	12821991	22	9.72227	4.38131	5.61954	3_peak_693	chr14	12822303	12823053	Exon	ENSMUSG00000054423	Cadps	gi|70906474|ref|NP_036191.2|	6471	0	calcium-dependent secretion activator 1 isoform 1 [Mus musculus]	gi|50927183|gb|BC079679.1|	7854	0	Mus musculus Ca2+-dependent secretion activator, mRNA (cDNA clone IMAGE:30537768), with apparent retained intron	Q62717	139	6e-37	Calcium-dependent secretion activator 1	.	.	.	.	pfam06292	DUF1041	Domain of Unknown Function (DUF1041). This family consists of several eukaryotic domains of unknown function. Members of this family are often found in tandem repeats and co-occur with pfam00168, pfam00130 and pfam00169 domains.	GO:0050432|catecholamine secretion;GO:1990504|dense core granule exocytosis;GO:0006887|exocytosis;GO:0015031|protein transport;GO:0016082|synaptic vesicle priming;GO:0016050|vesicle organization;	GO:0030054|cell junction;GO:0030659|cytoplasmic vesicle membrane;GO:0005829|cytosol;GO:0098793|presynapse;	GO:0008289|lipid binding;GO:0046872|metal ion binding;GO:0019901|protein kinase binding;	.	.
chr14	12821868	12822674	807	12821991	22	9.72227	4.38131	5.61954	3_peak_693	chr14	12822303	12823045	Exon	ENSMUSG00000054423	Cadps	gi|70906474|ref|NP_036191.2|	6471	0	calcium-dependent secretion activator 1 isoform 1 [Mus musculus]	gi|50927183|gb|BC079679.1|	7854	0	Mus musculus Ca2+-dependent secretion activator, mRNA (cDNA clone IMAGE:30537768), with apparent retained intron	Q62717	139	6e-37	Calcium-dependent secretion activator 1	.	.	.	.	pfam06292	DUF1041	Domain of Unknown Function (DUF1041). This family consists of several eukaryotic domains of unknown function. Members of this family are often found in tandem repeats and co-occur with pfam00168, pfam00130 and pfam00169 domains.	GO:0050432|catecholamine secretion;GO:1990504|dense core granule exocytosis;GO:0006887|exocytosis;GO:0015031|protein transport;GO:0016082|synaptic vesicle priming;GO:0016050|vesicle organization;	GO:0030054|cell junction;GO:0030659|cytoplasmic vesicle membrane;GO:0005829|cytosol;GO:0098793|presynapse;	GO:0008289|lipid binding;GO:0046872|metal ion binding;GO:0019901|protein kinase binding;	.	.
chr14	12821868	12822674	807	12821991	22	9.72227	4.38131	5.61954	3_peak_693	chr14	12715395	12822303	Intron	ENSMUSG00000054423	Cadps	gi|70906474|ref|NP_036191.2|	6471	0	calcium-dependent secretion activator 1 isoform 1 [Mus musculus]	gi|50927183|gb|BC079679.1|	7854	0	Mus musculus Ca2+-dependent secretion activator, mRNA (cDNA clone IMAGE:30537768), with apparent retained intron	Q62717	139	6e-37	Calcium-dependent secretion activator 1	.	.	.	.	pfam06292	DUF1041	Domain of Unknown Function (DUF1041). This family consists of several eukaryotic domains of unknown function. Members of this family are often found in tandem repeats and co-occur with pfam00168, pfam00130 and pfam00169 domains.	GO:0050432|catecholamine secretion;GO:1990504|dense core granule exocytosis;GO:0006887|exocytosis;GO:0015031|protein transport;GO:0016082|synaptic vesicle priming;GO:0016050|vesicle organization;	GO:0030054|cell junction;GO:0030659|cytoplasmic vesicle membrane;GO:0005829|cytosol;GO:0098793|presynapse;	GO:0008289|lipid binding;GO:0046872|metal ion binding;GO:0019901|protein kinase binding;	.	.
chr12	8301533	8302160	628	8301659	27	6.84706	2.89977	3.22419	3_peak_470	chr12	8301566	8301954	Exon	ENSMUSG00000037660	Gdf7	gi|33859664|ref|NP_038555.1|	1438	0	growth/differentiation factor 7 isoform 2 precursor [Mus musculus]	gi|919184463|ref|NM_001312876.1|	1423	0	Mus musculus growth differentiation factor 7 (Gdf7), transcript variant 1, mRNA	P43029	544	0	Growth/differentiation factor 7	.	.	.	.	pfam00019	TGF_beta	Transforming growth factor beta like domain.	GO:0032924|activin receptor signaling pathway;GO:0007411|axon guidance;GO:0030509|BMP signaling pathway;GO:0048754|branching morphogenesis of an epithelial tube;GO:0045165|cell fate commitment;GO:0030855|epithelial cell differentiation;GO:0048853|forebrain morphogenesis;GO:0022612|gland morphogenesis;GO:0040007|growth;GO:0030901|midbrain development;GO:0060571|morphogenesis of an epithelial fold;…	GO:0005576|extracellular region;GO:0005615|extracellular space;	GO:0005125|cytokine activity;GO:0042803|protein homodimerization activity;GO:0005160|transforming growth factor beta receptor binding;	.	.
chr12	8301533	8302160	628	8301659	27	6.84706	2.89977	3.22419	3_peak_470	chr12	8298928	8301566	Intron	ENSMUSG00000037660	Gdf7	gi|33859664|ref|NP_038555.1|	1438	0	growth/differentiation factor 7 isoform 2 precursor [Mus musculus]	gi|919184463|ref|NM_001312876.1|	1423	0	Mus musculus growth differentiation factor 7 (Gdf7), transcript variant 1, mRNA	P43029	544	0	Growth/differentiation factor 7	.	.	.	.	pfam00019	TGF_beta	Transforming growth factor beta like domain.	GO:0032924|activin receptor signaling pathway;GO:0007411|axon guidance;GO:0030509|BMP signaling pathway;GO:0048754|branching morphogenesis of an epithelial tube;GO:0045165|cell fate commitment;GO:0030855|epithelial cell differentiation;GO:0048853|forebrain morphogenesis;GO:0022612|gland morphogenesis;GO:0040007|growth;GO:0030901|midbrain development;GO:0060571|morphogenesis of an epithelial fold;…	GO:0005576|extracellular region;GO:0005615|extracellular space;	GO:0005125|cytokine activity;GO:0042803|protein homodimerization activity;GO:0005160|transforming growth factor beta receptor binding;	.	.
chr12	8301533	8302160	628	8301659	27	6.84706	2.89977	3.22419	3_peak_470	chr12	8298952	8301566	Intron	ENSMUSG00000037660	Gdf7	gi|33859664|ref|NP_038555.1|	1438	0	growth/differentiation factor 7 isoform 2 precursor [Mus musculus]	gi|919184463|ref|NM_001312876.1|	1423	0	Mus musculus growth differentiation factor 7 (Gdf7), transcript variant 1, mRNA	P43029	544	0	Growth/differentiation factor 7	.	.	.	.	pfam00019	TGF_beta	Transforming growth factor beta like domain.	GO:0032924|activin receptor signaling pathway;GO:0007411|axon guidance;GO:0030509|BMP signaling pathway;GO:0048754|branching morphogenesis of an epithelial tube;GO:0045165|cell fate commitment;GO:0030855|epithelial cell differentiation;GO:0048853|forebrain morphogenesis;GO:0022612|gland morphogenesis;GO:0040007|growth;GO:0030901|midbrain development;GO:0060571|morphogenesis of an epithelial fold;…	GO:0005576|extracellular region;GO:0005615|extracellular space;	GO:0005125|cytokine activity;GO:0042803|protein homodimerization activity;GO:0005160|transforming growth factor beta receptor binding;	.	.
chr12	8301533	8302160	628	8301659	27	6.84706	2.89977	3.22419	3_peak_470	chr12	8301954	8303954	Upstream2k	ENSMUSG00000037660	Gdf7	gi|33859664|ref|NP_038555.1|	1438	0	growth/differentiation factor 7 isoform 2 precursor [Mus musculus]	gi|919184463|ref|NM_001312876.1|	1423	0	Mus musculus growth differentiation factor 7 (Gdf7), transcript variant 1, mRNA	P43029	544	0	Growth/differentiation factor 7	.	.	.	.	pfam00019	TGF_beta	Transforming growth factor beta like domain.	GO:0032924|activin receptor signaling pathway;GO:0007411|axon guidance;GO:0030509|BMP signaling pathway;GO:0048754|branching morphogenesis of an epithelial tube;GO:0045165|cell fate commitment;GO:0030855|epithelial cell differentiation;GO:0048853|forebrain morphogenesis;GO:0022612|gland morphogenesis;GO:0040007|growth;GO:0030901|midbrain development;GO:0060571|morphogenesis of an epithelial fold;…	GO:0005576|extracellular region;GO:0005615|extracellular space;	GO:0005125|cytokine activity;GO:0042803|protein homodimerization activity;GO:0005160|transforming growth factor beta receptor binding;	.	.
chr12	8301533	8302160	628	8301659	27	6.84706	2.89977	3.22419	3_peak_470	chr12	8301933	8301954	UTR5	ENSMUSG00000037660	Gdf7	gi|33859664|ref|NP_038555.1|	1438	0	growth/differentiation factor 7 isoform 2 precursor [Mus musculus]	gi|919184463|ref|NM_001312876.1|	1423	0	Mus musculus growth differentiation factor 7 (Gdf7), transcript variant 1, mRNA	P43029	544	0	Growth/differentiation factor 7	.	.	.	.	pfam00019	TGF_beta	Transforming growth factor beta like domain.	GO:0032924|activin receptor signaling pathway;GO:0007411|axon guidance;GO:0030509|BMP signaling pathway;GO:0048754|branching morphogenesis of an epithelial tube;GO:0045165|cell fate commitment;GO:0030855|epithelial cell differentiation;GO:0048853|forebrain morphogenesis;GO:0022612|gland morphogenesis;GO:0040007|growth;GO:0030901|midbrain development;GO:0060571|morphogenesis of an epithelial fold;…	GO:0005576|extracellular region;GO:0005615|extracellular space;	GO:0005125|cytokine activity;GO:0042803|protein homodimerization activity;GO:0005160|transforming growth factor beta receptor binding;	.	.
chr4	114924781	114925537	757	114924971	46	7.56246	2.38868	3.80065	3_peak_1712a	chr4	114923146	114925146	Downstream2k	ENSMUSG00000044518	Foxe3	gi|187954379|gb|AAI41058.1|	734	7e-93	Forkhead box E3 [Mus musculus]	gi|325197121|ref|NM_015758.2|	867	0	Mus musculus forkhead box E3 (Foxe3), mRNA	Q9QY14	287	3e-94	Forkhead box protein E3	SPBC4C3.05	102	3e-23	COG5025	pfam00250	Fork_head	Fork head domain.	GO:0043010|camera-type eye development;GO:0048468|cell development;GO:0061073|ciliary body morphogenesis;GO:0061303|cornea development in camera-type eye;GO:0001654|eye development;GO:0061072|iris morphogenesis;GO:0002088|lens development in camera-type eye;GO:0043066|negative regulation of apoptotic process;GO:0071157|negative regulation of cell cycle arrest;GO:1902747|negative regulation of len…	GO:0005634|nucleus;GO:0005667|transcription factor complex;	GO:0000981|RNA polymerase II transcription factor activity, sequence-specific DNA binding;GO:0043565|sequence-specific DNA binding;GO:0003700|transcription factor activity, sequence-specific DNA binding;	K09398	FOXE; forkhead box protein E
chr4	114924781	114925537	757	114924971	46	7.56246	2.38868	3.80065	3_peak_1712a	chr4	114925146	114926013	Exon	ENSMUSG00000044518	Foxe3	gi|187954379|gb|AAI41058.1|	734	7e-93	Forkhead box E3 [Mus musculus]	gi|325197121|ref|NM_015758.2|	867	0	Mus musculus forkhead box E3 (Foxe3), mRNA	Q9QY14	287	3e-94	Forkhead box protein E3	SPBC4C3.05	102	3e-23	COG5025	pfam00250	Fork_head	Fork head domain.	GO:0043010|camera-type eye development;GO:0048468|cell development;GO:0061073|ciliary body morphogenesis;GO:0061303|cornea development in camera-type eye;GO:0001654|eye development;GO:0061072|iris morphogenesis;GO:0002088|lens development in camera-type eye;GO:0043066|negative regulation of apoptotic process;GO:0071157|negative regulation of cell cycle arrest;GO:1902747|negative regulation of len…	GO:0005634|nucleus;GO:0005667|transcription factor complex;	GO:0000981|RNA polymerase II transcription factor activity, sequence-specific DNA binding;GO:0043565|sequence-specific DNA binding;GO:0003700|transcription factor activity, sequence-specific DNA binding;	K09398	FOXE; forkhead box protein E
chr4	114924781	114925537	757	114925347	40	5.18779	2.0689	1.98571	3_peak_1712b	chr4	114923146	114925146	Downstream2k	ENSMUSG00000044518	Foxe3	gi|187954379|gb|AAI41058.1|	734	7e-93	Forkhead box E3 [Mus musculus]	gi|325197121|ref|NM_015758.2|	867	0	Mus musculus forkhead box E3 (Foxe3), mRNA	Q9QY14	287	3e-94	Forkhead box protein E3	SPBC4C3.05	102	3e-23	COG5025	pfam00250	Fork_head	Fork head domain.	GO:0043010|camera-type eye development;GO:0048468|cell development;GO:0061073|ciliary body morphogenesis;GO:0061303|cornea development in camera-type eye;GO:0001654|eye development;GO:0061072|iris morphogenesis;GO:0002088|lens development in camera-type eye;GO:0043066|negative regulation of apoptotic process;GO:0071157|negative regulation of cell cycle arrest;GO:1902747|negative regulation of len…	GO:0005634|nucleus;GO:0005667|transcription factor complex;	GO:0000981|RNA polymerase II transcription factor activity, sequence-specific DNA binding;GO:0043565|sequence-specific DNA binding;GO:0003700|transcription factor activity, sequence-specific DNA binding;	K09398	FOXE; forkhead box protein E
chr4	114924781	114925537	757	114925347	40	5.18779	2.0689	1.98571	3_peak_1712b	chr4	114925146	114926013	Exon	ENSMUSG00000044518	Foxe3	gi|187954379|gb|AAI41058.1|	734	7e-93	Forkhead box E3 [Mus musculus]	gi|325197121|ref|NM_015758.2|	867	0	Mus musculus forkhead box E3 (Foxe3), mRNA	Q9QY14	287	3e-94	Forkhead box protein E3	SPBC4C3.05	102	3e-23	COG5025	pfam00250	Fork_head	Fork head domain.	GO:0043010|camera-type eye development;GO:0048468|cell development;GO:0061073|ciliary body morphogenesis;GO:0061303|cornea development in camera-type eye;GO:0001654|eye development;GO:0061072|iris morphogenesis;GO:0002088|lens development in camera-type eye;GO:0043066|negative regulation of apoptotic process;GO:0071157|negative regulation of cell cycle arrest;GO:1902747|negative regulation of len…	GO:0005634|nucleus;GO:0005667|transcription factor complex;	GO:0000981|RNA polymerase II transcription factor activity, sequence-specific DNA binding;GO:0043565|sequence-specific DNA binding;GO:0003700|transcription factor activity, sequence-specific DNA binding;	K09398	FOXE; forkhead box protein E
chr5	112227819	112228570	752	112228230	34	7.66817	2.7873	3.88747	3_peak_1938	chr5	112226105	112228105	Downstream2k	ENSMUSG00000097767	Miat	gi|148688037|gb|EDL19984.1|	1097	8e-133	mCG128631, isoform CRA_c, partial [Mus musculus]	gi|644988726|tpe|HG979665.1|	9163	0	TPA: Mus musculus long non-coding RNA OTTMUST00000113299.1 (Miat gene), lincRNA	.	.	.	.	.	.	.	.	pfam15449	Retinal	Retinal protein. This family of proteins is found in the photoreceptor cells of the retina. Mutations of the gene encoding this protein have been associated with retinal disorders such as retinitis pigmentosa and late-onset progressive retinal atrophy. The function of this family of proteins is unknown, but it is likely to be important in the development and function of the retina.	.	.	.	.	.
chr5	112227819	112228570	752	112228230	34	7.66817	2.7873	3.88747	3_peak_1938	chr5	112226607	112228607	Downstream2k	ENSMUSG00000099010	Gm27357	gi|148688036|gb|EDL19983.1|	214	3e-20	mCG128631, isoform CRA_b, partial [Mus musculus]	gi|29135712|gb|AC123795.4|	135	3e-63	Mus musculus BAC clone RP24-317K11 from chromosome 5, complete sequence	.	.	.	.	.	.	.	.	pfam15548	DUF4655	Domain of unknown function (DUF4655). This family of proteins is found in eukaryotes. Proteins in this family are typically between 533 and 570 amino acids in length.	.	.	.	.	.
chr5	112227819	112228570	752	112228230	34	7.66817	2.7873	3.88747	3_peak_1938	chr5	112228054	112228178	Exon	ENSMUSG00000097767	Miat	gi|148688037|gb|EDL19984.1|	1097	8e-133	mCG128631, isoform CRA_c, partial [Mus musculus]	gi|644988726|tpe|HG979665.1|	9163	0	TPA: Mus musculus long non-coding RNA OTTMUST00000113299.1 (Miat gene), lincRNA	.	.	.	.	.	.	.	.	pfam15449	Retinal	Retinal protein. This family of proteins is found in the photoreceptor cells of the retina. Mutations of the gene encoding this protein have been associated with retinal disorders such as retinitis pigmentosa and late-onset progressive retinal atrophy. The function of this family of proteins is unknown, but it is likely to be important in the development and function of the retina.	.	.	.	.	.
chr5	112227819	112228570	752	112228230	34	7.66817	2.7873	3.88747	3_peak_1938	chr5	112228054	112228214	Exon	ENSMUSG00000097767	Miat	gi|148688037|gb|EDL19984.1|	1097	8e-133	mCG128631, isoform CRA_c, partial [Mus musculus]	gi|644988726|tpe|HG979665.1|	9163	0	TPA: Mus musculus long non-coding RNA OTTMUST00000113299.1 (Miat gene), lincRNA	.	.	.	.	.	.	.	.	pfam15449	Retinal	Retinal protein. This family of proteins is found in the photoreceptor cells of the retina. Mutations of the gene encoding this protein have been associated with retinal disorders such as retinitis pigmentosa and late-onset progressive retinal atrophy. The function of this family of proteins is unknown, but it is likely to be important in the development and function of the retina.	.	.	.	.	.
chr5	112227819	112228570	752	112228230	34	7.66817	2.7873	3.88747	3_peak_1938	chr5	112228064	112228176	Exon	ENSMUSG00000097986	Gm26953	gi|148688035|gb|EDL19982.1|	262	3e-34	mCG128631, isoform CRA_a [Mus musculus]	gi|29135712|gb|AC123795.4|	1750	0	Mus musculus BAC clone RP24-317K11 from chromosome 5, complete sequence	.	.	.	.	.	.	.	.	pfam15483	DUF4641	Domain of unknown function (DUF4641). This family of proteins is found in eukaryotes. Proteins in this family are typically between 201 and 519 amino acids in length.	.	.	.	.	.
chr5	112227819	112228570	752	112228230	34	7.66817	2.7873	3.88747	3_peak_1938	chr5	112228064	112228207	Exon	ENSMUSG00000097986	Gm26953	gi|148688035|gb|EDL19982.1|	262	3e-34	mCG128631, isoform CRA_a [Mus musculus]	gi|29135712|gb|AC123795.4|	1750	0	Mus musculus BAC clone RP24-317K11 from chromosome 5, complete sequence	.	.	.	.	.	.	.	.	pfam15483	DUF4641	Domain of unknown function (DUF4641). This family of proteins is found in eukaryotes. Proteins in this family are typically between 201 and 519 amino acids in length.	.	.	.	.	.
chr5	112227819	112228570	752	112228230	34	7.66817	2.7873	3.88747	3_peak_1938	chr5	112228064	112228530	Exon	ENSMUSG00000097986	Gm26953	gi|148688035|gb|EDL19982.1|	262	3e-34	mCG128631, isoform CRA_a [Mus musculus]	gi|29135712|gb|AC123795.4|	1750	0	Mus musculus BAC clone RP24-317K11 from chromosome 5, complete sequence	.	.	.	.	.	.	.	.	pfam15483	DUF4641	Domain of unknown function (DUF4641). This family of proteins is found in eukaryotes. Proteins in this family are typically between 201 and 519 amino acids in length.	.	.	.	.	.
chr5	112227819	112228570	752	112228230	34	7.66817	2.7873	3.88747	3_peak_1938	chr5	112228105	112228356	Exon	ENSMUSG00000097767	Miat	gi|148688037|gb|EDL19984.1|	1097	8e-133	mCG128631, isoform CRA_c, partial [Mus musculus]	gi|644988726|tpe|HG979665.1|	9163	0	TPA: Mus musculus long non-coding RNA OTTMUST00000113299.1 (Miat gene), lincRNA	.	.	.	.	.	.	.	.	pfam15449	Retinal	Retinal protein. This family of proteins is found in the photoreceptor cells of the retina. Mutations of the gene encoding this protein have been associated with retinal disorders such as retinitis pigmentosa and late-onset progressive retinal atrophy. The function of this family of proteins is unknown, but it is likely to be important in the development and function of the retina.	.	.	.	.	.
chr5	112227819	112228570	752	112228230	34	7.66817	2.7873	3.88747	3_peak_1938	chr5	112228300	112228356	Exon	ENSMUSG00000097767	Miat	gi|148688037|gb|EDL19984.1|	1097	8e-133	mCG128631, isoform CRA_c, partial [Mus musculus]	gi|644988726|tpe|HG979665.1|	9163	0	TPA: Mus musculus long non-coding RNA OTTMUST00000113299.1 (Miat gene), lincRNA	.	.	.	.	.	.	.	.	pfam15449	Retinal	Retinal protein. This family of proteins is found in the photoreceptor cells of the retina. Mutations of the gene encoding this protein have been associated with retinal disorders such as retinitis pigmentosa and late-onset progressive retinal atrophy. The function of this family of proteins is unknown, but it is likely to be important in the development and function of the retina.	.	.	.	.	.
chr5	112227819	112228570	752	112228230	34	7.66817	2.7873	3.88747	3_peak_1938	chr5	112228308	112228356	Exon	ENSMUSG00000097767	Miat	gi|148688037|gb|EDL19984.1|	1097	8e-133	mCG128631, isoform CRA_c, partial [Mus musculus]	gi|644988726|tpe|HG979665.1|	9163	0	TPA: Mus musculus long non-coding RNA OTTMUST00000113299.1 (Miat gene), lincRNA	.	.	.	.	.	.	.	.	pfam15449	Retinal	Retinal protein. This family of proteins is found in the photoreceptor cells of the retina. Mutations of the gene encoding this protein have been associated with retinal disorders such as retinitis pigmentosa and late-onset progressive retinal atrophy. The function of this family of proteins is unknown, but it is likely to be important in the development and function of the retina.	.	.	.	.	.
chr5	112227819	112228570	752	112228230	34	7.66817	2.7873	3.88747	3_peak_1938	chr5	112224356	112228054	Intron	ENSMUSG00000097767	Miat	gi|148688037|gb|EDL19984.1|	1097	8e-133	mCG128631, isoform CRA_c, partial [Mus musculus]	gi|644988726|tpe|HG979665.1|	9163	0	TPA: Mus musculus long non-coding RNA OTTMUST00000113299.1 (Miat gene), lincRNA	.	.	.	.	.	.	.	.	pfam15449	Retinal	Retinal protein. This family of proteins is found in the photoreceptor cells of the retina. Mutations of the gene encoding this protein have been associated with retinal disorders such as retinitis pigmentosa and late-onset progressive retinal atrophy. The function of this family of proteins is unknown, but it is likely to be important in the development and function of the retina.	.	.	.	.	.
chr5	112227819	112228570	752	112228230	34	7.66817	2.7873	3.88747	3_peak_1938	chr5	112224356	112228300	Intron	ENSMUSG00000097767	Miat	gi|148688037|gb|EDL19984.1|	1097	8e-133	mCG128631, isoform CRA_c, partial [Mus musculus]	gi|644988726|tpe|HG979665.1|	9163	0	TPA: Mus musculus long non-coding RNA OTTMUST00000113299.1 (Miat gene), lincRNA	.	.	.	.	.	.	.	.	pfam15449	Retinal	Retinal protein. This family of proteins is found in the photoreceptor cells of the retina. Mutations of the gene encoding this protein have been associated with retinal disorders such as retinitis pigmentosa and late-onset progressive retinal atrophy. The function of this family of proteins is unknown, but it is likely to be important in the development and function of the retina.	.	.	.	.	.
chr5	112227819	112228570	752	112228230	34	7.66817	2.7873	3.88747	3_peak_1938	chr5	112224386	112228064	Intron	ENSMUSG00000097986	Gm26953	gi|148688035|gb|EDL19982.1|	262	3e-34	mCG128631, isoform CRA_a [Mus musculus]	gi|29135712|gb|AC123795.4|	1750	0	Mus musculus BAC clone RP24-317K11 from chromosome 5, complete sequence	.	.	.	.	.	.	.	.	pfam15483	DUF4641	Domain of unknown function (DUF4641). This family of proteins is found in eukaryotes. Proteins in this family are typically between 201 and 519 amino acids in length.	.	.	.	.	.
chr5	112227819	112228570	752	112228230	34	7.66817	2.7873	3.88747	3_peak_1938	chr5	112228176	112230189	Intron	ENSMUSG00000097986	Gm26953	gi|148688035|gb|EDL19982.1|	262	3e-34	mCG128631, isoform CRA_a [Mus musculus]	gi|29135712|gb|AC123795.4|	1750	0	Mus musculus BAC clone RP24-317K11 from chromosome 5, complete sequence	.	.	.	.	.	.	.	.	pfam15483	DUF4641	Domain of unknown function (DUF4641). This family of proteins is found in eukaryotes. Proteins in this family are typically between 201 and 519 amino acids in length.	.	.	.	.	.
chr5	112227819	112228570	752	112228230	34	7.66817	2.7873	3.88747	3_peak_1938	chr5	112228178	112228308	Intron	ENSMUSG00000097767	Miat	gi|148688037|gb|EDL19984.1|	1097	8e-133	mCG128631, isoform CRA_c, partial [Mus musculus]	gi|644988726|tpe|HG979665.1|	9163	0	TPA: Mus musculus long non-coding RNA OTTMUST00000113299.1 (Miat gene), lincRNA	.	.	.	.	.	.	.	.	pfam15449	Retinal	Retinal protein. This family of proteins is found in the photoreceptor cells of the retina. Mutations of the gene encoding this protein have been associated with retinal disorders such as retinitis pigmentosa and late-onset progressive retinal atrophy. The function of this family of proteins is unknown, but it is likely to be important in the development and function of the retina.	.	.	.	.	.
chr5	112227819	112228570	752	112228230	34	7.66817	2.7873	3.88747	3_peak_1938	chr5	112228178	112228608	Intron	ENSMUSG00000097767	Miat	gi|148688037|gb|EDL19984.1|	1097	8e-133	mCG128631, isoform CRA_c, partial [Mus musculus]	gi|644988726|tpe|HG979665.1|	9163	0	TPA: Mus musculus long non-coding RNA OTTMUST00000113299.1 (Miat gene), lincRNA	.	.	.	.	.	.	.	.	pfam15449	Retinal	Retinal protein. This family of proteins is found in the photoreceptor cells of the retina. Mutations of the gene encoding this protein have been associated with retinal disorders such as retinitis pigmentosa and late-onset progressive retinal atrophy. The function of this family of proteins is unknown, but it is likely to be important in the development and function of the retina.	.	.	.	.	.
chr5	112227819	112228570	752	112228230	34	7.66817	2.7873	3.88747	3_peak_1938	chr5	112228207	112230189	Intron	ENSMUSG00000097986	Gm26953	gi|148688035|gb|EDL19982.1|	262	3e-34	mCG128631, isoform CRA_a [Mus musculus]	gi|29135712|gb|AC123795.4|	1750	0	Mus musculus BAC clone RP24-317K11 from chromosome 5, complete sequence	.	.	.	.	.	.	.	.	pfam15483	DUF4641	Domain of unknown function (DUF4641). This family of proteins is found in eukaryotes. Proteins in this family are typically between 201 and 519 amino acids in length.	.	.	.	.	.
chr5	112227819	112228570	752	112228230	34	7.66817	2.7873	3.88747	3_peak_1938	chr5	112228207	112228731	Intron	ENSMUSG00000097986	Gm26953	gi|148688035|gb|EDL19982.1|	262	3e-34	mCG128631, isoform CRA_a [Mus musculus]	gi|29135712|gb|AC123795.4|	1750	0	Mus musculus BAC clone RP24-317K11 from chromosome 5, complete sequence	.	.	.	.	.	.	.	.	pfam15483	DUF4641	Domain of unknown function (DUF4641). This family of proteins is found in eukaryotes. Proteins in this family are typically between 201 and 519 amino acids in length.	.	.	.	.	.
chr5	112227819	112228570	752	112228230	34	7.66817	2.7873	3.88747	3_peak_1938	chr5	112228214	112228300	Intron	ENSMUSG00000097767	Miat	gi|148688037|gb|EDL19984.1|	1097	8e-133	mCG128631, isoform CRA_c, partial [Mus musculus]	gi|644988726|tpe|HG979665.1|	9163	0	TPA: Mus musculus long non-coding RNA OTTMUST00000113299.1 (Miat gene), lincRNA	.	.	.	.	.	.	.	.	pfam15449	Retinal	Retinal protein. This family of proteins is found in the photoreceptor cells of the retina. Mutations of the gene encoding this protein have been associated with retinal disorders such as retinitis pigmentosa and late-onset progressive retinal atrophy. The function of this family of proteins is unknown, but it is likely to be important in the development and function of the retina.	.	.	.	.	.
chr5	112227819	112228570	752	112228230	34	7.66817	2.7873	3.88747	3_peak_1938	chr5	112228356	112228608	Intron	ENSMUSG00000097767	Miat	gi|148688037|gb|EDL19984.1|	1097	8e-133	mCG128631, isoform CRA_c, partial [Mus musculus]	gi|644988726|tpe|HG979665.1|	9163	0	TPA: Mus musculus long non-coding RNA OTTMUST00000113299.1 (Miat gene), lincRNA	.	.	.	.	.	.	.	.	pfam15449	Retinal	Retinal protein. This family of proteins is found in the photoreceptor cells of the retina. Mutations of the gene encoding this protein have been associated with retinal disorders such as retinitis pigmentosa and late-onset progressive retinal atrophy. The function of this family of proteins is unknown, but it is likely to be important in the development and function of the retina.	.	.	.	.	.
chr5	112227819	112228570	752	112228230	34	7.66817	2.7873	3.88747	3_peak_1938	chr5	112228530	112230530	Downstream2k	ENSMUSG00000097986	Gm26953	gi|148688035|gb|EDL19982.1|	262	3e-34	mCG128631, isoform CRA_a [Mus musculus]	gi|29135712|gb|AC123795.4|	1750	0	Mus musculus BAC clone RP24-317K11 from chromosome 5, complete sequence	.	.	.	.	.	.	.	.	pfam15483	DUF4641	Domain of unknown function (DUF4641). This family of proteins is found in eukaryotes. Proteins in this family are typically between 201 and 519 amino acids in length.	.	.	.	.	.
chr1	34472990	34473416	427	34473163	18	5.19742	2.89335	1.99234	3_peak_20	chr1	34472811	34473112	Exon	ENSMUSG00000100280	Gm28417	gi|74221424|dbj|BAE43238.1|	264	1e-26	unnamed protein product [Mus musculus]	gi|59858770|gb|AC106841.11|	1601	0	Mus musculus chromosome 1, clone RP24-554B1, complete sequence	Q61152	75.9	6e-15	Tyrosine-protein phosphatase non-receptor type 18	.	.	.	.	pfam00102	Y_phosphatase	Protein-tyrosine phosphatase.	.	GO:0005737|cytoplasm;GO:0005634|nucleus;	GO:0004726|non-membrane spanning protein tyrosine phosphatase activity;	K18024	PTPN12_18_22; tyrosine-protein phosphatase non-receptor type 12/18/22 [EC:3.1.3.48]
chr1	34472990	34473416	427	34473163	18	5.19742	2.89335	1.99234	3_peak_20	chr1	34472811	34473148	Exon	ENSMUSG00000100280	Gm28417	gi|74221424|dbj|BAE43238.1|	264	1e-26	unnamed protein product [Mus musculus]	gi|59858770|gb|AC106841.11|	1601	0	Mus musculus chromosome 1, clone RP24-554B1, complete sequence	Q61152	75.9	6e-15	Tyrosine-protein phosphatase non-receptor type 18	.	.	.	.	pfam00102	Y_phosphatase	Protein-tyrosine phosphatase.	.	GO:0005737|cytoplasm;GO:0005634|nucleus;	GO:0004726|non-membrane spanning protein tyrosine phosphatase activity;	K18024	PTPN12_18_22; tyrosine-protein phosphatase non-receptor type 12/18/22 [EC:3.1.3.48]
chr1	34472990	34473416	427	34473163	18	5.19742	2.89335	1.99234	3_peak_20	chr1	34473334	34473409	Exon	ENSMUSG00000026126	Ptpn18	gi|113199761|ref|NP_035336.2|	2433	0	tyrosine-protein phosphatase non-receptor type 18 [Mus musculus]	gi|59858770|gb|AC106841.11|	3404	0	Mus musculus chromosome 1, clone RP24-554B1, complete sequence	Q61152	99	3e-20	Tyrosine-protein phosphatase non-receptor type 18	SPAC19D5.01	132	8e-32	COG5599	pfam00102	Y_phosphatase	Protein-tyrosine phosphatase.	.	GO:0005737|cytoplasm;GO:0005634|nucleus;	GO:0004726|non-membrane spanning protein tyrosine phosphatase activity;	K18024	PTPN12_18_22; tyrosine-protein phosphatase non-receptor type 12/18/22 [EC:3.1.3.48]
chr1	34472990	34473416	427	34473163	18	5.19742	2.89335	1.99234	3_peak_20	chr1	34472968	34473334	Intron	ENSMUSG00000026126	Ptpn18	gi|113199761|ref|NP_035336.2|	2433	0	tyrosine-protein phosphatase non-receptor type 18 [Mus musculus]	gi|59858770|gb|AC106841.11|	3404	0	Mus musculus chromosome 1, clone RP24-554B1, complete sequence	Q61152	99	3e-20	Tyrosine-protein phosphatase non-receptor type 18	SPAC19D5.01	132	8e-32	COG5599	pfam00102	Y_phosphatase	Protein-tyrosine phosphatase.	.	GO:0005737|cytoplasm;GO:0005634|nucleus;	GO:0004726|non-membrane spanning protein tyrosine phosphatase activity;	K18024	PTPN12_18_22; tyrosine-protein phosphatase non-receptor type 12/18/22 [EC:3.1.3.48]
chr1	34472990	34473416	427	34473163	18	5.19742	2.89335	1.99234	3_peak_20	chr1	34473409	34473578	Intron	ENSMUSG00000026126	Ptpn18	gi|113199761|ref|NP_035336.2|	2433	0	tyrosine-protein phosphatase non-receptor type 18 [Mus musculus]	gi|59858770|gb|AC106841.11|	3404	0	Mus musculus chromosome 1, clone RP24-554B1, complete sequence	Q61152	99	3e-20	Tyrosine-protein phosphatase non-receptor type 18	SPAC19D5.01	132	8e-32	COG5599	pfam00102	Y_phosphatase	Protein-tyrosine phosphatase.	.	GO:0005737|cytoplasm;GO:0005634|nucleus;	GO:0004726|non-membrane spanning protein tyrosine phosphatase activity;	K18024	PTPN12_18_22; tyrosine-protein phosphatase non-receptor type 12/18/22 [EC:3.1.3.48]
chr1	34472990	34473416	427	34473163	18	5.19742	2.89335	1.99234	3_peak_20	chr1	34473409	34475643	Intron	ENSMUSG00000026126	Ptpn18	gi|113199761|ref|NP_035336.2|	2433	0	tyrosine-protein phosphatase non-receptor type 18 [Mus musculus]	gi|59858770|gb|AC106841.11|	3404	0	Mus musculus chromosome 1, clone RP24-554B1, complete sequence	Q61152	99	3e-20	Tyrosine-protein phosphatase non-receptor type 18	SPAC19D5.01	132	8e-32	COG5599	pfam00102	Y_phosphatase	Protein-tyrosine phosphatase.	.	GO:0005737|cytoplasm;GO:0005634|nucleus;	GO:0004726|non-membrane spanning protein tyrosine phosphatase activity;	K18024	PTPN12_18_22; tyrosine-protein phosphatase non-receptor type 12/18/22 [EC:3.1.3.48]
chr1	34472990	34473416	427	34473163	18	5.19742	2.89335	1.99234	3_peak_20	chr1	34473148	34475148	Upstream2k	ENSMUSG00000100280	Gm28417	gi|74221424|dbj|BAE43238.1|	264	1e-26	unnamed protein product [Mus musculus]	gi|59858770|gb|AC106841.11|	1601	0	Mus musculus chromosome 1, clone RP24-554B1, complete sequence	Q61152	75.9	6e-15	Tyrosine-protein phosphatase non-receptor type 18	.	.	.	.	pfam00102	Y_phosphatase	Protein-tyrosine phosphatase.	.	GO:0005737|cytoplasm;GO:0005634|nucleus;	GO:0004726|non-membrane spanning protein tyrosine phosphatase activity;	K18024	PTPN12_18_22; tyrosine-protein phosphatase non-receptor type 12/18/22 [EC:3.1.3.48]
chr1	34472990	34473416	427	34473163	18	5.19742	2.89335	1.99234	3_peak_20	chr1	34473112	34475112	Upstream2k	ENSMUSG00000100280	Gm28417	gi|74221424|dbj|BAE43238.1|	264	1e-26	unnamed protein product [Mus musculus]	gi|59858770|gb|AC106841.11|	1601	0	Mus musculus chromosome 1, clone RP24-554B1, complete sequence	Q61152	75.9	6e-15	Tyrosine-protein phosphatase non-receptor type 18	.	.	.	.	pfam00102	Y_phosphatase	Protein-tyrosine phosphatase.	.	GO:0005737|cytoplasm;GO:0005634|nucleus;	GO:0004726|non-membrane spanning protein tyrosine phosphatase activity;	K18024	PTPN12_18_22; tyrosine-protein phosphatase non-receptor type 12/18/22 [EC:3.1.3.48]
chr1	34472990	34473416	427	34473163	18	5.19742	2.89335	1.99234	3_peak_20	chr1	34472498	34474498	Upstream2k	ENSMUSG00000026126	Ptpn18	gi|113199761|ref|NP_035336.2|	2433	0	tyrosine-protein phosphatase non-receptor type 18 [Mus musculus]	gi|59858770|gb|AC106841.11|	3404	0	Mus musculus chromosome 1, clone RP24-554B1, complete sequence	Q61152	99	3e-20	Tyrosine-protein phosphatase non-receptor type 18	SPAC19D5.01	132	8e-32	COG5599	pfam00102	Y_phosphatase	Protein-tyrosine phosphatase.	.	GO:0005737|cytoplasm;GO:0005634|nucleus;	GO:0004726|non-membrane spanning protein tyrosine phosphatase activity;	K18024	PTPN12_18_22; tyrosine-protein phosphatase non-receptor type 12/18/22 [EC:3.1.3.48]
chr1	34472990	34473416	427	34473163	18	5.19742	2.89335	1.99234	3_peak_20	chr1	34471917	34473917	Downstream2k	ENSMUSG00000026126	Ptpn18	gi|113199761|ref|NP_035336.2|	2433	0	tyrosine-protein phosphatase non-receptor type 18 [Mus musculus]	gi|59858770|gb|AC106841.11|	3404	0	Mus musculus chromosome 1, clone RP24-554B1, complete sequence	Q61152	99	3e-20	Tyrosine-protein phosphatase non-receptor type 18	SPAC19D5.01	132	8e-32	COG5599	pfam00102	Y_phosphatase	Protein-tyrosine phosphatase.	.	GO:0005737|cytoplasm;GO:0005634|nucleus;	GO:0004726|non-membrane spanning protein tyrosine phosphatase activity;	K18024	PTPN12_18_22; tyrosine-protein phosphatase non-receptor type 12/18/22 [EC:3.1.3.48]
chr1	34472990	34473416	427	34473163	18	5.19742	2.89335	1.99234	3_peak_20	chr1	34471916	34473916	Downstream2k	ENSMUSG00000026126	Ptpn18	gi|113199761|ref|NP_035336.2|	2433	0	tyrosine-protein phosphatase non-receptor type 18 [Mus musculus]	gi|59858770|gb|AC106841.11|	3404	0	Mus musculus chromosome 1, clone RP24-554B1, complete sequence	Q61152	99	3e-20	Tyrosine-protein phosphatase non-receptor type 18	SPAC19D5.01	132	8e-32	COG5599	pfam00102	Y_phosphatase	Protein-tyrosine phosphatase.	.	GO:0005737|cytoplasm;GO:0005634|nucleus;	GO:0004726|non-membrane spanning protein tyrosine phosphatase activity;	K18024	PTPN12_18_22; tyrosine-protein phosphatase non-receptor type 12/18/22 [EC:3.1.3.48]
chr13	78203205	78204617	1413	78204226	52	15.4403	3.65087	10.7677	3_peak_653c	chr13	78198222	78231217	Intron	ENSMUSG00000087143	A830082K12Rik	gi|45478222|gb|AAS66282.1|	458	1e-73	LRRGT00191 [Rattus norvegicus]	gi|644990799|tpe|HG981624.1|	4176	0	TPA: Mus musculus long non-coding RNA OTTMUST00000113146.1 (RP23-471B6.2 gene), antisense	P11369	169	1e-67	LINE-1 retrotransposable element ORF2 protein	BH1654	57.8	3e-11	COG0105	pfam00105	zf-C4	Zinc finger, C4 type (two domains). In nearly all cases, this is the DNA binding domain of a nuclear hormone receptor. The alignment contains two Zinc finger domains that are too dissimilar to be aligned with each other.	GO:0006310|DNA recombination;	.	GO:0004519|endonuclease activity;GO:0046872|metal ion binding;GO:0003964|RNA-directed DNA polymerase activity;	K08547	NR2F1, TFCOUP1; COUP transcription factor 1
chr13	78203205	78204617	1413	78204226	52	15.4403	3.65087	10.7677	3_peak_653c	chr13	78199831	78231217	Intron	ENSMUSG00000087143	A830082K12Rik	gi|45478222|gb|AAS66282.1|	458	1e-73	LRRGT00191 [Rattus norvegicus]	gi|644990799|tpe|HG981624.1|	4176	0	TPA: Mus musculus long non-coding RNA OTTMUST00000113146.1 (RP23-471B6.2 gene), antisense	P11369	169	1e-67	LINE-1 retrotransposable element ORF2 protein	BH1654	57.8	3e-11	COG0105	pfam00105	zf-C4	Zinc finger, C4 type (two domains). In nearly all cases, this is the DNA binding domain of a nuclear hormone receptor. The alignment contains two Zinc finger domains that are too dissimilar to be aligned with each other.	GO:0006310|DNA recombination;	.	GO:0004519|endonuclease activity;GO:0046872|metal ion binding;GO:0003964|RNA-directed DNA polymerase activity;	K08547	NR2F1, TFCOUP1; COUP transcription factor 1
chr13	78203205	78204617	1413	78204226	52	15.4403	3.65087	10.7677	3_peak_653c	chr13	78202153	78231217	Intron	ENSMUSG00000087143	A830082K12Rik	gi|45478222|gb|AAS66282.1|	458	1e-73	LRRGT00191 [Rattus norvegicus]	gi|644990799|tpe|HG981624.1|	4176	0	TPA: Mus musculus long non-coding RNA OTTMUST00000113146.1 (RP23-471B6.2 gene), antisense	P11369	169	1e-67	LINE-1 retrotransposable element ORF2 protein	BH1654	57.8	3e-11	COG0105	pfam00105	zf-C4	Zinc finger, C4 type (two domains). In nearly all cases, this is the DNA binding domain of a nuclear hormone receptor. The alignment contains two Zinc finger domains that are too dissimilar to be aligned with each other.	GO:0006310|DNA recombination;	.	GO:0004519|endonuclease activity;GO:0046872|metal ion binding;GO:0003964|RNA-directed DNA polymerase activity;	K08547	NR2F1, TFCOUP1; COUP transcription factor 1
chr13	78203205	78204617	1413	78204226	52	15.4403	3.65087	10.7677	3_peak_653c	chr13	78202477	78231217	Intron	ENSMUSG00000087143	A830082K12Rik	gi|45478222|gb|AAS66282.1|	458	1e-73	LRRGT00191 [Rattus norvegicus]	gi|644990799|tpe|HG981624.1|	4176	0	TPA: Mus musculus long non-coding RNA OTTMUST00000113146.1 (RP23-471B6.2 gene), antisense	P11369	169	1e-67	LINE-1 retrotransposable element ORF2 protein	BH1654	57.8	3e-11	COG0105	pfam00105	zf-C4	Zinc finger, C4 type (two domains). In nearly all cases, this is the DNA binding domain of a nuclear hormone receptor. The alignment contains two Zinc finger domains that are too dissimilar to be aligned with each other.	GO:0006310|DNA recombination;	.	GO:0004519|endonuclease activity;GO:0046872|metal ion binding;GO:0003964|RNA-directed DNA polymerase activity;	K08547	NR2F1, TFCOUP1; COUP transcription factor 1
chr13	78203205	78204617	1413	78204226	52	15.4403	3.65087	10.7677	3_peak_653c	chr13	78202858	78231217	Intron	ENSMUSG00000087143	A830082K12Rik	gi|45478222|gb|AAS66282.1|	458	1e-73	LRRGT00191 [Rattus norvegicus]	gi|644990799|tpe|HG981624.1|	4176	0	TPA: Mus musculus long non-coding RNA OTTMUST00000113146.1 (RP23-471B6.2 gene), antisense	P11369	169	1e-67	LINE-1 retrotransposable element ORF2 protein	BH1654	57.8	3e-11	COG0105	pfam00105	zf-C4	Zinc finger, C4 type (two domains). In nearly all cases, this is the DNA binding domain of a nuclear hormone receptor. The alignment contains two Zinc finger domains that are too dissimilar to be aligned with each other.	GO:0006310|DNA recombination;	.	GO:0004519|endonuclease activity;GO:0046872|metal ion binding;GO:0003964|RNA-directed DNA polymerase activity;	K08547	NR2F1, TFCOUP1; COUP transcription factor 1
chr13	78203205	78204617	1413	78204226	52	15.4403	3.65087	10.7677	3_peak_653c	chr13	78202858	78275287	Intron	ENSMUSG00000087143	A830082K12Rik	gi|45478222|gb|AAS66282.1|	458	1e-73	LRRGT00191 [Rattus norvegicus]	gi|644990799|tpe|HG981624.1|	4176	0	TPA: Mus musculus long non-coding RNA OTTMUST00000113146.1 (RP23-471B6.2 gene), antisense	P11369	169	1e-67	LINE-1 retrotransposable element ORF2 protein	BH1654	57.8	3e-11	COG0105	pfam00105	zf-C4	Zinc finger, C4 type (two domains). In nearly all cases, this is the DNA binding domain of a nuclear hormone receptor. The alignment contains two Zinc finger domains that are too dissimilar to be aligned with each other.	GO:0006310|DNA recombination;	.	GO:0004519|endonuclease activity;GO:0046872|metal ion binding;GO:0003964|RNA-directed DNA polymerase activity;	K08547	NR2F1, TFCOUP1; COUP transcription factor 1
chr11	16257476	16258008	533	16257941	15	5.39686	3.24153	2.13745	3_peak_287	chr11	16257723	16258086	Exon	ENSMUSG00000048834	Vstm2a	gi|148708711|gb|EDL40658.1|	1429	0	cDNA sequence BC027127, isoform CRA_a [Mus musculus]	gi|281182809|ref|NM_145967.2|	3264	0	Mus musculus V-set and transmembrane domain containing 2A (Vstm2a), transcript variant 2, mRNA	Q8R0A6	255	3e-83	V-set and transmembrane domain-containing protein 2A	.	.	.	.	pfam07679	I-set	Immunoglobulin I-set domain.	.	GO:0005576|extracellular region;GO:0016021|integral component of membrane;GO:0005886|plasma membrane;	.	.	.
chr11	16257476	16258008	533	16257941	15	5.39686	3.24153	2.13745	3_peak_287	chr11	16257802	16258086	Exon	ENSMUSG00000048834	Vstm2a	gi|148708711|gb|EDL40658.1|	1429	0	cDNA sequence BC027127, isoform CRA_a [Mus musculus]	gi|281182809|ref|NM_145967.2|	3264	0	Mus musculus V-set and transmembrane domain containing 2A (Vstm2a), transcript variant 2, mRNA	Q8R0A6	255	3e-83	V-set and transmembrane domain-containing protein 2A	.	.	.	.	pfam07679	I-set	Immunoglobulin I-set domain.	.	GO:0005576|extracellular region;GO:0016021|integral component of membrane;GO:0005886|plasma membrane;	.	.	.
chr11	16257476	16258008	533	16257941	15	5.39686	3.24153	2.13745	3_peak_287	chr11	16255723	16257723	Upstream2k	ENSMUSG00000048834	Vstm2a	gi|148708711|gb|EDL40658.1|	1429	0	cDNA sequence BC027127, isoform CRA_a [Mus musculus]	gi|281182809|ref|NM_145967.2|	3264	0	Mus musculus V-set and transmembrane domain containing 2A (Vstm2a), transcript variant 2, mRNA	Q8R0A6	255	3e-83	V-set and transmembrane domain-containing protein 2A	.	.	.	.	pfam07679	I-set	Immunoglobulin I-set domain.	.	GO:0005576|extracellular region;GO:0016021|integral component of membrane;GO:0005886|plasma membrane;	.	.	.
chr11	16257476	16258008	533	16257941	15	5.39686	3.24153	2.13745	3_peak_287	chr11	16255802	16257802	Upstream2k	ENSMUSG00000048834	Vstm2a	gi|148708711|gb|EDL40658.1|	1429	0	cDNA sequence BC027127, isoform CRA_a [Mus musculus]	gi|281182809|ref|NM_145967.2|	3264	0	Mus musculus V-set and transmembrane domain containing 2A (Vstm2a), transcript variant 2, mRNA	Q8R0A6	255	3e-83	V-set and transmembrane domain-containing protein 2A	.	.	.	.	pfam07679	I-set	Immunoglobulin I-set domain.	.	GO:0005576|extracellular region;GO:0016021|integral component of membrane;GO:0005886|plasma membrane;	.	.	.
chr11	16257476	16258008	533	16257941	15	5.39686	3.24153	2.13745	3_peak_287	chr11	16256062	16258062	Upstream2k	ENSMUSG00000048834	Vstm2a	gi|148708711|gb|EDL40658.1|	1429	0	cDNA sequence BC027127, isoform CRA_a [Mus musculus]	gi|281182809|ref|NM_145967.2|	3264	0	Mus musculus V-set and transmembrane domain containing 2A (Vstm2a), transcript variant 2, mRNA	Q8R0A6	255	3e-83	V-set and transmembrane domain-containing protein 2A	.	.	.	.	pfam07679	I-set	Immunoglobulin I-set domain.	.	GO:0005576|extracellular region;GO:0016021|integral component of membrane;GO:0005886|plasma membrane;	.	.	.
chr11	16257476	16258008	533	16257941	15	5.39686	3.24153	2.13745	3_peak_287	chr11	16257723	16258007	UTR5	ENSMUSG00000048834	Vstm2a	gi|148708711|gb|EDL40658.1|	1429	0	cDNA sequence BC027127, isoform CRA_a [Mus musculus]	gi|281182809|ref|NM_145967.2|	3264	0	Mus musculus V-set and transmembrane domain containing 2A (Vstm2a), transcript variant 2, mRNA	Q8R0A6	255	3e-83	V-set and transmembrane domain-containing protein 2A	.	.	.	.	pfam07679	I-set	Immunoglobulin I-set domain.	.	GO:0005576|extracellular region;GO:0016021|integral component of membrane;GO:0005886|plasma membrane;	.	.	.
chr11	16257476	16258008	533	16257941	15	5.39686	3.24153	2.13745	3_peak_287	chr11	16257802	16258007	UTR5	ENSMUSG00000048834	Vstm2a	gi|148708711|gb|EDL40658.1|	1429	0	cDNA sequence BC027127, isoform CRA_a [Mus musculus]	gi|281182809|ref|NM_145967.2|	3264	0	Mus musculus V-set and transmembrane domain containing 2A (Vstm2a), transcript variant 2, mRNA	Q8R0A6	255	3e-83	V-set and transmembrane domain-containing protein 2A	.	.	.	.	pfam07679	I-set	Immunoglobulin I-set domain.	.	GO:0005576|extracellular region;GO:0016021|integral component of membrane;GO:0005886|plasma membrane;	.	.	.
chr4	137109004	137109472	469	137109277	25	5.13654	2.47925	1.94853	3_peak_1769	-//-	-//-	-//-	--//--
chr10	33783680	33784393	714	33783941	13	7.94575	4.91165	4.11395	3_peak_190	chr10	33782125	33786666	Intron	ENSMUSG00000090298	Sult3a2	gi|168229231|ref|NP_001094922.1|	1567	0	uncharacterized protein LOC215895 [Mus musculus]	gi|568965316|ref|XM_006512694.1|	930	0	PREDICTED: Mus musculus predicted gene 4794 (Gm4794), transcript variant X1, mRNA	O35403	518	0	Amine sulfotransferase	.	.	.	.	pfam00685	Sulfotransfer_1	Sulfotransferase domain.	GO:0051923|sulfation;	GO:0005737|cytoplasm;	GO:0047685|amine sulfotransferase activity;GO:0008146|sulfotransferase activity;	.	.
chr10	33783680	33784393	714	33783941	13	7.94575	4.91165	4.11395	3_peak_190	chr10	33782115	33784115	Upstream2k	ENSMUSG00000090298	Sult3a2	gi|168229231|ref|NP_001094922.1|	1567	0	uncharacterized protein LOC215895 [Mus musculus]	gi|568965316|ref|XM_006512694.1|	930	0	PREDICTED: Mus musculus predicted gene 4794 (Gm4794), transcript variant X1, mRNA	O35403	518	0	Amine sulfotransferase	.	.	.	.	pfam00685	Sulfotransfer_1	Sulfotransferase domain.	GO:0051923|sulfation;	GO:0005737|cytoplasm;	GO:0047685|amine sulfotransferase activity;GO:0008146|sulfotransferase activity;	.	.
chr13	78203205	78204617	1413	78203347	35	6.35218	2.43771	2.84253	3_peak_653a	chr13	78198222	78231217	Intron	ENSMUSG00000087143	A830082K12Rik	gi|45478222|gb|AAS66282.1|	458	1e-73	LRRGT00191 [Rattus norvegicus]	gi|644990799|tpe|HG981624.1|	4176	0	TPA: Mus musculus long non-coding RNA OTTMUST00000113146.1 (RP23-471B6.2 gene), antisense	P11369	169	1e-67	LINE-1 retrotransposable element ORF2 protein	BH1654	57.8	3e-11	COG0105	pfam00105	zf-C4	Zinc finger, C4 type (two domains). In nearly all cases, this is the DNA binding domain of a nuclear hormone receptor. The alignment contains two Zinc finger domains that are too dissimilar to be aligned with each other.	GO:0006310|DNA recombination;	.	GO:0004519|endonuclease activity;GO:0046872|metal ion binding;GO:0003964|RNA-directed DNA polymerase activity;	K08547	NR2F1, TFCOUP1; COUP transcription factor 1
chr13	78203205	78204617	1413	78203347	35	6.35218	2.43771	2.84253	3_peak_653a	chr13	78199831	78231217	Intron	ENSMUSG00000087143	A830082K12Rik	gi|45478222|gb|AAS66282.1|	458	1e-73	LRRGT00191 [Rattus norvegicus]	gi|644990799|tpe|HG981624.1|	4176	0	TPA: Mus musculus long non-coding RNA OTTMUST00000113146.1 (RP23-471B6.2 gene), antisense	P11369	169	1e-67	LINE-1 retrotransposable element ORF2 protein	BH1654	57.8	3e-11	COG0105	pfam00105	zf-C4	Zinc finger, C4 type (two domains). In nearly all cases, this is the DNA binding domain of a nuclear hormone receptor. The alignment contains two Zinc finger domains that are too dissimilar to be aligned with each other.	GO:0006310|DNA recombination;	.	GO:0004519|endonuclease activity;GO:0046872|metal ion binding;GO:0003964|RNA-directed DNA polymerase activity;	K08547	NR2F1, TFCOUP1; COUP transcription factor 1
chr13	78203205	78204617	1413	78203347	35	6.35218	2.43771	2.84253	3_peak_653a	chr13	78202153	78231217	Intron	ENSMUSG00000087143	A830082K12Rik	gi|45478222|gb|AAS66282.1|	458	1e-73	LRRGT00191 [Rattus norvegicus]	gi|644990799|tpe|HG981624.1|	4176	0	TPA: Mus musculus long non-coding RNA OTTMUST00000113146.1 (RP23-471B6.2 gene), antisense	P11369	169	1e-67	LINE-1 retrotransposable element ORF2 protein	BH1654	57.8	3e-11	COG0105	pfam00105	zf-C4	Zinc finger, C4 type (two domains). In nearly all cases, this is the DNA binding domain of a nuclear hormone receptor. The alignment contains two Zinc finger domains that are too dissimilar to be aligned with each other.	GO:0006310|DNA recombination;	.	GO:0004519|endonuclease activity;GO:0046872|metal ion binding;GO:0003964|RNA-directed DNA polymerase activity;	K08547	NR2F1, TFCOUP1; COUP transcription factor 1
chr13	78203205	78204617	1413	78203347	35	6.35218	2.43771	2.84253	3_peak_653a	chr13	78202477	78231217	Intron	ENSMUSG00000087143	A830082K12Rik	gi|45478222|gb|AAS66282.1|	458	1e-73	LRRGT00191 [Rattus norvegicus]	gi|644990799|tpe|HG981624.1|	4176	0	TPA: Mus musculus long non-coding RNA OTTMUST00000113146.1 (RP23-471B6.2 gene), antisense	P11369	169	1e-67	LINE-1 retrotransposable element ORF2 protein	BH1654	57.8	3e-11	COG0105	pfam00105	zf-C4	Zinc finger, C4 type (two domains). In nearly all cases, this is the DNA binding domain of a nuclear hormone receptor. The alignment contains two Zinc finger domains that are too dissimilar to be aligned with each other.	GO:0006310|DNA recombination;	.	GO:0004519|endonuclease activity;GO:0046872|metal ion binding;GO:0003964|RNA-directed DNA polymerase activity;	K08547	NR2F1, TFCOUP1; COUP transcription factor 1
chr13	78203205	78204617	1413	78203347	35	6.35218	2.43771	2.84253	3_peak_653a	chr13	78202858	78231217	Intron	ENSMUSG00000087143	A830082K12Rik	gi|45478222|gb|AAS66282.1|	458	1e-73	LRRGT00191 [Rattus norvegicus]	gi|644990799|tpe|HG981624.1|	4176	0	TPA: Mus musculus long non-coding RNA OTTMUST00000113146.1 (RP23-471B6.2 gene), antisense	P11369	169	1e-67	LINE-1 retrotransposable element ORF2 protein	BH1654	57.8	3e-11	COG0105	pfam00105	zf-C4	Zinc finger, C4 type (two domains). In nearly all cases, this is the DNA binding domain of a nuclear hormone receptor. The alignment contains two Zinc finger domains that are too dissimilar to be aligned with each other.	GO:0006310|DNA recombination;	.	GO:0004519|endonuclease activity;GO:0046872|metal ion binding;GO:0003964|RNA-directed DNA polymerase activity;	K08547	NR2F1, TFCOUP1; COUP transcription factor 1
chr13	78203205	78204617	1413	78203347	35	6.35218	2.43771	2.84253	3_peak_653a	chr13	78202858	78275287	Intron	ENSMUSG00000087143	A830082K12Rik	gi|45478222|gb|AAS66282.1|	458	1e-73	LRRGT00191 [Rattus norvegicus]	gi|644990799|tpe|HG981624.1|	4176	0	TPA: Mus musculus long non-coding RNA OTTMUST00000113146.1 (RP23-471B6.2 gene), antisense	P11369	169	1e-67	LINE-1 retrotransposable element ORF2 protein	BH1654	57.8	3e-11	COG0105	pfam00105	zf-C4	Zinc finger, C4 type (two domains). In nearly all cases, this is the DNA binding domain of a nuclear hormone receptor. The alignment contains two Zinc finger domains that are too dissimilar to be aligned with each other.	GO:0006310|DNA recombination;	.	GO:0004519|endonuclease activity;GO:0046872|metal ion binding;GO:0003964|RNA-directed DNA polymerase activity;	K08547	NR2F1, TFCOUP1; COUP transcription factor 1
chr17	26857568	26858134	567	26857958	33	8.54872	3.05913	4.61904	3_peak_1001	-//-	-//-	-//-	--//--
chr4	134251790	134252191	402	134251895	28	5.35791	2.42453	2.10952	3_peak_1755	chr4	134251109	134252258	Exon	ENSMUSG00000050105	Grrp1	gi|568931936|ref|XP_006539260.1|	1333	0	PREDICTED: protein FAM110D isoform X2 [Mus musculus]	gi|444741705|ref|NM_001099296.2|	1226	0	Mus musculus glycine/arginine rich protein 1 (Grrp1), mRNA	Q80X91	303	3e-102	Protein FAM110D	.	.	.	.	pfam14160	FAM110_C	Centrosome-associated C terminus. This is the C-terminus of a family of proteins that colocalize with the centrosome/microtubule organisation centre in interphase and at the spindle poles in mitosis.	GO:0046485|ether lipid metabolic process;GO:0006633|fatty acid biosynthetic process;GO:0006643|membrane lipid metabolic process;	GO:0005783|endoplasmic reticulum;GO:0005789|endoplasmic reticulum membrane;GO:0016021|integral component of membrane;	GO:0050479|glyceryl-ether monooxygenase activity;GO:0005506|iron ion binding;	.	.
chr4	134251790	134252191	402	134251895	28	5.35791	2.42453	2.10952	3_peak_1755	chr4	134251705	134252258	Exon	ENSMUSG00000050105	Grrp1	gi|568931936|ref|XP_006539260.1|	1333	0	PREDICTED: protein FAM110D isoform X2 [Mus musculus]	gi|444741705|ref|NM_001099296.2|	1226	0	Mus musculus glycine/arginine rich protein 1 (Grrp1), mRNA	Q80X91	303	3e-102	Protein FAM110D	.	.	.	.	pfam14160	FAM110_C	Centrosome-associated C terminus. This is the C-terminus of a family of proteins that colocalize with the centrosome/microtubule organisation centre in interphase and at the spindle poles in mitosis.	GO:0046485|ether lipid metabolic process;GO:0006633|fatty acid biosynthetic process;GO:0006643|membrane lipid metabolic process;	GO:0005783|endoplasmic reticulum;GO:0005789|endoplasmic reticulum membrane;GO:0016021|integral component of membrane;	GO:0050479|glyceryl-ether monooxygenase activity;GO:0005506|iron ion binding;	.	.
chr4	134251790	134252191	402	134251895	28	5.35791	2.42453	2.10952	3_peak_1755	chr4	134252165	134252258	UTR5	ENSMUSG00000050105	Grrp1	gi|568931936|ref|XP_006539260.1|	1333	0	PREDICTED: protein FAM110D isoform X2 [Mus musculus]	gi|444741705|ref|NM_001099296.2|	1226	0	Mus musculus glycine/arginine rich protein 1 (Grrp1), mRNA	Q80X91	303	3e-102	Protein FAM110D	.	.	.	.	pfam14160	FAM110_C	Centrosome-associated C terminus. This is the C-terminus of a family of proteins that colocalize with the centrosome/microtubule organisation centre in interphase and at the spindle poles in mitosis.	GO:0046485|ether lipid metabolic process;GO:0006633|fatty acid biosynthetic process;GO:0006643|membrane lipid metabolic process;	GO:0005783|endoplasmic reticulum;GO:0005789|endoplasmic reticulum membrane;GO:0016021|integral component of membrane;	GO:0050479|glyceryl-ether monooxygenase activity;GO:0005506|iron ion binding;	.	.
chr4	134251790	134252191	402	134251895	28	5.35791	2.42453	2.10952	3_peak_1755	chr4	134250042	134252042	Downstream2k	ENSMUSG00000108398	Gm30191	gi|918615496|ref|XP_013375118.1|	630	1e-79	PREDICTED: uncharacterized protein LOC102013790 [Chinchilla lanigera]	gi|829975939|ref|XM_012750542.1|	362	0	PREDICTED: Microcebus murinus testis development-related protein (LOC105863462), mRNA	.	.	.	.	.	.	.	.	pfam02063	MARCKS	MARCKS family.	.	.	.	.	.
chr2	133782535	133783026	492	133782964	13	6.7922	4.23586	3.18043	3_peak_1423	-//-	-//-	-//-	--//--
chr11	117436269	117436663	395	117436476	25	6.79122	2.99952	3.17986	3_peak_459	chr11	117436348	117436495	Exon	ENSMUSG00000085336	Gm11732	gi|148702672|gb|EDL34619.1|	723	2e-89	mCG145525, partial [Mus musculus]	gi|755483927|ref|XR_864533.1|	1742	0	PREDICTED: Mus musculus predicted gene 11732 (Gm11732), transcript variant X2, ncRNA	.	.	.	.	.	.	.	.	.	.	.	.	.	.	.	.
chr11	117436269	117436663	395	117436476	25	6.79122	2.99952	3.17986	3_peak_459	chr11	117426255	117436348	Intron	ENSMUSG00000085336	Gm11732	gi|148702672|gb|EDL34619.1|	723	2e-89	mCG145525, partial [Mus musculus]	gi|755483927|ref|XR_864533.1|	1742	0	PREDICTED: Mus musculus predicted gene 11732 (Gm11732), transcript variant X2, ncRNA	.	.	.	.	.	.	.	.	.	.	.	.	.	.	.	.
chr11	117436269	117436663	395	117436476	25	6.79122	2.99952	3.17986	3_peak_459	chr11	117436495	117436787	Intron	ENSMUSG00000085336	Gm11732	gi|148702672|gb|EDL34619.1|	723	2e-89	mCG145525, partial [Mus musculus]	gi|755483927|ref|XR_864533.1|	1742	0	PREDICTED: Mus musculus predicted gene 11732 (Gm11732), transcript variant X2, ncRNA	.	.	.	.	.	.	.	.	.	.	.	.	.	.	.	.
chr4	55650929	55651517	589	55651309	35	7.38853	2.67955	3.66077	3_peak_1656	-//-	-//-	-//-	--//--
chr19	36056729	36057460	732	36057210	25	8.7716	3.67825	4.80333	3_peak_1188	chr19	36056705	36057340	Exon	ENSMUSG00000024798	Htr7	gi|569006447|ref|XP_006526764.1|	2372	0	PREDICTED: 5-hydroxytryptamine receptor 7 isoform X1 [Mus musculus]	gi|74226455|dbj|AK139197.1|	3130	0	Mus musculus 7 days neonate cerebellum cDNA, RIKEN full-length enriched library, clone:A730064F17 product:5-hydroxytryptamine (serotonin) receptor 7, full insert sequence	P32304	316	1e-98	5-hydroxytryptamine receptor 7	.	.	.	.	pfam00001	7tm_1	7 transmembrane receptor (rhodopsin family). This family contains, amongst other G-protein-coupled receptors (GCPRs), members of the opsin family, which have been considered to be typical members of the rhodopsin superfamily. They share several motifs, mainly the seven transmembrane helices, GCPRs of the rhodopsin superfamily. All opsins bind a chromophore, such as 11-cis-retinal. The function of…	GO:0007192|adenylate cyclase-activating serotonin receptor signaling pathway;GO:0007268|synaptic transmission;GO:0007623|circadian rhythm;GO:0006939|smooth muscle contraction;GO:0042310|vasoconstriction;	GO:0030425|dendrite;GO:0005887|integral component of plasma membrane;	GO:0004993|serotonin receptor activity;GO:0030594|neurotransmitter receptor activity;	K04163	HTR7; 5-hydroxytryptamine receptor 7
chr19	36056729	36057460	732	36057210	25	8.7716	3.67825	4.80333	3_peak_1188	chr19	36056705	36057360	Exon	ENSMUSG00000024798	Htr7	gi|569006447|ref|XP_006526764.1|	2372	0	PREDICTED: 5-hydroxytryptamine receptor 7 isoform X1 [Mus musculus]	gi|74226455|dbj|AK139197.1|	3130	0	Mus musculus 7 days neonate cerebellum cDNA, RIKEN full-length enriched library, clone:A730064F17 product:5-hydroxytryptamine (serotonin) receptor 7, full insert sequence	P32304	316	1e-98	5-hydroxytryptamine receptor 7	.	.	.	.	pfam00001	7tm_1	7 transmembrane receptor (rhodopsin family). This family contains, amongst other G-protein-coupled receptors (GCPRs), members of the opsin family, which have been considered to be typical members of the rhodopsin superfamily. They share several motifs, mainly the seven transmembrane helices, GCPRs of the rhodopsin superfamily. All opsins bind a chromophore, such as 11-cis-retinal. The function of…	GO:0007192|adenylate cyclase-activating serotonin receptor signaling pathway;GO:0007268|synaptic transmission;GO:0007623|circadian rhythm;GO:0006939|smooth muscle contraction;GO:0042310|vasoconstriction;	GO:0030425|dendrite;GO:0005887|integral component of plasma membrane;	GO:0004993|serotonin receptor activity;GO:0030594|neurotransmitter receptor activity;	K04163	HTR7; 5-hydroxytryptamine receptor 7
chr19	36056729	36057460	732	36057210	25	8.7716	3.67825	4.80333	3_peak_1188	chr19	36056705	36057368	Exon	ENSMUSG00000024798	Htr7	gi|569006447|ref|XP_006526764.1|	2372	0	PREDICTED: 5-hydroxytryptamine receptor 7 isoform X1 [Mus musculus]	gi|74226455|dbj|AK139197.1|	3130	0	Mus musculus 7 days neonate cerebellum cDNA, RIKEN full-length enriched library, clone:A730064F17 product:5-hydroxytryptamine (serotonin) receptor 7, full insert sequence	P32304	316	1e-98	5-hydroxytryptamine receptor 7	.	.	.	.	pfam00001	7tm_1	7 transmembrane receptor (rhodopsin family). This family contains, amongst other G-protein-coupled receptors (GCPRs), members of the opsin family, which have been considered to be typical members of the rhodopsin superfamily. They share several motifs, mainly the seven transmembrane helices, GCPRs of the rhodopsin superfamily. All opsins bind a chromophore, such as 11-cis-retinal. The function of…	GO:0007192|adenylate cyclase-activating serotonin receptor signaling pathway;GO:0007268|synaptic transmission;GO:0007623|circadian rhythm;GO:0006939|smooth muscle contraction;GO:0042310|vasoconstriction;	GO:0030425|dendrite;GO:0005887|integral component of plasma membrane;	GO:0004993|serotonin receptor activity;GO:0030594|neurotransmitter receptor activity;	K04163	HTR7; 5-hydroxytryptamine receptor 7
chr19	36056729	36057460	732	36057210	25	8.7716	3.67825	4.80333	3_peak_1188	chr19	36056705	36057373	Exon	ENSMUSG00000024798	Htr7	gi|569006447|ref|XP_006526764.1|	2372	0	PREDICTED: 5-hydroxytryptamine receptor 7 isoform X1 [Mus musculus]	gi|74226455|dbj|AK139197.1|	3130	0	Mus musculus 7 days neonate cerebellum cDNA, RIKEN full-length enriched library, clone:A730064F17 product:5-hydroxytryptamine (serotonin) receptor 7, full insert sequence	P32304	316	1e-98	5-hydroxytryptamine receptor 7	.	.	.	.	pfam00001	7tm_1	7 transmembrane receptor (rhodopsin family). This family contains, amongst other G-protein-coupled receptors (GCPRs), members of the opsin family, which have been considered to be typical members of the rhodopsin superfamily. They share several motifs, mainly the seven transmembrane helices, GCPRs of the rhodopsin superfamily. All opsins bind a chromophore, such as 11-cis-retinal. The function of…	GO:0007192|adenylate cyclase-activating serotonin receptor signaling pathway;GO:0007268|synaptic transmission;GO:0007623|circadian rhythm;GO:0006939|smooth muscle contraction;GO:0042310|vasoconstriction;	GO:0030425|dendrite;GO:0005887|integral component of plasma membrane;	GO:0004993|serotonin receptor activity;GO:0030594|neurotransmitter receptor activity;	K04163	HTR7; 5-hydroxytryptamine receptor 7
chr19	36056729	36057460	732	36057210	25	8.7716	3.67825	4.80333	3_peak_1188	chr19	36056705	36057507	Exon	ENSMUSG00000024798	Htr7	gi|569006447|ref|XP_006526764.1|	2372	0	PREDICTED: 5-hydroxytryptamine receptor 7 isoform X1 [Mus musculus]	gi|74226455|dbj|AK139197.1|	3130	0	Mus musculus 7 days neonate cerebellum cDNA, RIKEN full-length enriched library, clone:A730064F17 product:5-hydroxytryptamine (serotonin) receptor 7, full insert sequence	P32304	316	1e-98	5-hydroxytryptamine receptor 7	.	.	.	.	pfam00001	7tm_1	7 transmembrane receptor (rhodopsin family). This family contains, amongst other G-protein-coupled receptors (GCPRs), members of the opsin family, which have been considered to be typical members of the rhodopsin superfamily. They share several motifs, mainly the seven transmembrane helices, GCPRs of the rhodopsin superfamily. All opsins bind a chromophore, such as 11-cis-retinal. The function of…	GO:0007192|adenylate cyclase-activating serotonin receptor signaling pathway;GO:0007268|synaptic transmission;GO:0007623|circadian rhythm;GO:0006939|smooth muscle contraction;GO:0042310|vasoconstriction;	GO:0030425|dendrite;GO:0005887|integral component of plasma membrane;	GO:0004993|serotonin receptor activity;GO:0030594|neurotransmitter receptor activity;	K04163	HTR7; 5-hydroxytryptamine receptor 7
chr19	36056729	36057460	732	36057210	25	8.7716	3.67825	4.80333	3_peak_1188	chr19	36057340	36059340	Upstream2k	ENSMUSG00000024798	Htr7	gi|569006447|ref|XP_006526764.1|	2372	0	PREDICTED: 5-hydroxytryptamine receptor 7 isoform X1 [Mus musculus]	gi|74226455|dbj|AK139197.1|	3130	0	Mus musculus 7 days neonate cerebellum cDNA, RIKEN full-length enriched library, clone:A730064F17 product:5-hydroxytryptamine (serotonin) receptor 7, full insert sequence	P32304	316	1e-98	5-hydroxytryptamine receptor 7	.	.	.	.	pfam00001	7tm_1	7 transmembrane receptor (rhodopsin family). This family contains, amongst other G-protein-coupled receptors (GCPRs), members of the opsin family, which have been considered to be typical members of the rhodopsin superfamily. They share several motifs, mainly the seven transmembrane helices, GCPRs of the rhodopsin superfamily. All opsins bind a chromophore, such as 11-cis-retinal. The function of…	GO:0007192|adenylate cyclase-activating serotonin receptor signaling pathway;GO:0007268|synaptic transmission;GO:0007623|circadian rhythm;GO:0006939|smooth muscle contraction;GO:0042310|vasoconstriction;	GO:0030425|dendrite;GO:0005887|integral component of plasma membrane;	GO:0004993|serotonin receptor activity;GO:0030594|neurotransmitter receptor activity;	K04163	HTR7; 5-hydroxytryptamine receptor 7
chr19	36056729	36057460	732	36057210	25	8.7716	3.67825	4.80333	3_peak_1188	chr19	36057360	36059360	Upstream2k	ENSMUSG00000024798	Htr7	gi|569006447|ref|XP_006526764.1|	2372	0	PREDICTED: 5-hydroxytryptamine receptor 7 isoform X1 [Mus musculus]	gi|74226455|dbj|AK139197.1|	3130	0	Mus musculus 7 days neonate cerebellum cDNA, RIKEN full-length enriched library, clone:A730064F17 product:5-hydroxytryptamine (serotonin) receptor 7, full insert sequence	P32304	316	1e-98	5-hydroxytryptamine receptor 7	.	.	.	.	pfam00001	7tm_1	7 transmembrane receptor (rhodopsin family). This family contains, amongst other G-protein-coupled receptors (GCPRs), members of the opsin family, which have been considered to be typical members of the rhodopsin superfamily. They share several motifs, mainly the seven transmembrane helices, GCPRs of the rhodopsin superfamily. All opsins bind a chromophore, such as 11-cis-retinal. The function of…	GO:0007192|adenylate cyclase-activating serotonin receptor signaling pathway;GO:0007268|synaptic transmission;GO:0007623|circadian rhythm;GO:0006939|smooth muscle contraction;GO:0042310|vasoconstriction;	GO:0030425|dendrite;GO:0005887|integral component of plasma membrane;	GO:0004993|serotonin receptor activity;GO:0030594|neurotransmitter receptor activity;	K04163	HTR7; 5-hydroxytryptamine receptor 7
chr19	36056729	36057460	732	36057210	25	8.7716	3.67825	4.80333	3_peak_1188	chr19	36057368	36059368	Upstream2k	ENSMUSG00000024798	Htr7	gi|569006447|ref|XP_006526764.1|	2372	0	PREDICTED: 5-hydroxytryptamine receptor 7 isoform X1 [Mus musculus]	gi|74226455|dbj|AK139197.1|	3130	0	Mus musculus 7 days neonate cerebellum cDNA, RIKEN full-length enriched library, clone:A730064F17 product:5-hydroxytryptamine (serotonin) receptor 7, full insert sequence	P32304	316	1e-98	5-hydroxytryptamine receptor 7	.	.	.	.	pfam00001	7tm_1	7 transmembrane receptor (rhodopsin family). This family contains, amongst other G-protein-coupled receptors (GCPRs), members of the opsin family, which have been considered to be typical members of the rhodopsin superfamily. They share several motifs, mainly the seven transmembrane helices, GCPRs of the rhodopsin superfamily. All opsins bind a chromophore, such as 11-cis-retinal. The function of…	GO:0007192|adenylate cyclase-activating serotonin receptor signaling pathway;GO:0007268|synaptic transmission;GO:0007623|circadian rhythm;GO:0006939|smooth muscle contraction;GO:0042310|vasoconstriction;	GO:0030425|dendrite;GO:0005887|integral component of plasma membrane;	GO:0004993|serotonin receptor activity;GO:0030594|neurotransmitter receptor activity;	K04163	HTR7; 5-hydroxytryptamine receptor 7
chr19	36056729	36057460	732	36057210	25	8.7716	3.67825	4.80333	3_peak_1188	chr19	36057373	36059373	Upstream2k	ENSMUSG00000024798	Htr7	gi|569006447|ref|XP_006526764.1|	2372	0	PREDICTED: 5-hydroxytryptamine receptor 7 isoform X1 [Mus musculus]	gi|74226455|dbj|AK139197.1|	3130	0	Mus musculus 7 days neonate cerebellum cDNA, RIKEN full-length enriched library, clone:A730064F17 product:5-hydroxytryptamine (serotonin) receptor 7, full insert sequence	P32304	316	1e-98	5-hydroxytryptamine receptor 7	.	.	.	.	pfam00001	7tm_1	7 transmembrane receptor (rhodopsin family). This family contains, amongst other G-protein-coupled receptors (GCPRs), members of the opsin family, which have been considered to be typical members of the rhodopsin superfamily. They share several motifs, mainly the seven transmembrane helices, GCPRs of the rhodopsin superfamily. All opsins bind a chromophore, such as 11-cis-retinal. The function of…	GO:0007192|adenylate cyclase-activating serotonin receptor signaling pathway;GO:0007268|synaptic transmission;GO:0007623|circadian rhythm;GO:0006939|smooth muscle contraction;GO:0042310|vasoconstriction;	GO:0030425|dendrite;GO:0005887|integral component of plasma membrane;	GO:0004993|serotonin receptor activity;GO:0030594|neurotransmitter receptor activity;	K04163	HTR7; 5-hydroxytryptamine receptor 7
chr19	36056729	36057460	732	36057210	25	8.7716	3.67825	4.80333	3_peak_1188	chr19	36057253	36057340	UTR5	ENSMUSG00000024798	Htr7	gi|569006447|ref|XP_006526764.1|	2372	0	PREDICTED: 5-hydroxytryptamine receptor 7 isoform X1 [Mus musculus]	gi|74226455|dbj|AK139197.1|	3130	0	Mus musculus 7 days neonate cerebellum cDNA, RIKEN full-length enriched library, clone:A730064F17 product:5-hydroxytryptamine (serotonin) receptor 7, full insert sequence	P32304	316	1e-98	5-hydroxytryptamine receptor 7	.	.	.	.	pfam00001	7tm_1	7 transmembrane receptor (rhodopsin family). This family contains, amongst other G-protein-coupled receptors (GCPRs), members of the opsin family, which have been considered to be typical members of the rhodopsin superfamily. They share several motifs, mainly the seven transmembrane helices, GCPRs of the rhodopsin superfamily. All opsins bind a chromophore, such as 11-cis-retinal. The function of…	GO:0007192|adenylate cyclase-activating serotonin receptor signaling pathway;GO:0007268|synaptic transmission;GO:0007623|circadian rhythm;GO:0006939|smooth muscle contraction;GO:0042310|vasoconstriction;	GO:0030425|dendrite;GO:0005887|integral component of plasma membrane;	GO:0004993|serotonin receptor activity;GO:0030594|neurotransmitter receptor activity;	K04163	HTR7; 5-hydroxytryptamine receptor 7
chr19	36056729	36057460	732	36057210	25	8.7716	3.67825	4.80333	3_peak_1188	chr19	36057253	36057360	UTR5	ENSMUSG00000024798	Htr7	gi|569006447|ref|XP_006526764.1|	2372	0	PREDICTED: 5-hydroxytryptamine receptor 7 isoform X1 [Mus musculus]	gi|74226455|dbj|AK139197.1|	3130	0	Mus musculus 7 days neonate cerebellum cDNA, RIKEN full-length enriched library, clone:A730064F17 product:5-hydroxytryptamine (serotonin) receptor 7, full insert sequence	P32304	316	1e-98	5-hydroxytryptamine receptor 7	.	.	.	.	pfam00001	7tm_1	7 transmembrane receptor (rhodopsin family). This family contains, amongst other G-protein-coupled receptors (GCPRs), members of the opsin family, which have been considered to be typical members of the rhodopsin superfamily. They share several motifs, mainly the seven transmembrane helices, GCPRs of the rhodopsin superfamily. All opsins bind a chromophore, such as 11-cis-retinal. The function of…	GO:0007192|adenylate cyclase-activating serotonin receptor signaling pathway;GO:0007268|synaptic transmission;GO:0007623|circadian rhythm;GO:0006939|smooth muscle contraction;GO:0042310|vasoconstriction;	GO:0030425|dendrite;GO:0005887|integral component of plasma membrane;	GO:0004993|serotonin receptor activity;GO:0030594|neurotransmitter receptor activity;	K04163	HTR7; 5-hydroxytryptamine receptor 7
chr19	36056729	36057460	732	36057210	25	8.7716	3.67825	4.80333	3_peak_1188	chr19	36057253	36057368	UTR5	ENSMUSG00000024798	Htr7	gi|569006447|ref|XP_006526764.1|	2372	0	PREDICTED: 5-hydroxytryptamine receptor 7 isoform X1 [Mus musculus]	gi|74226455|dbj|AK139197.1|	3130	0	Mus musculus 7 days neonate cerebellum cDNA, RIKEN full-length enriched library, clone:A730064F17 product:5-hydroxytryptamine (serotonin) receptor 7, full insert sequence	P32304	316	1e-98	5-hydroxytryptamine receptor 7	.	.	.	.	pfam00001	7tm_1	7 transmembrane receptor (rhodopsin family). This family contains, amongst other G-protein-coupled receptors (GCPRs), members of the opsin family, which have been considered to be typical members of the rhodopsin superfamily. They share several motifs, mainly the seven transmembrane helices, GCPRs of the rhodopsin superfamily. All opsins bind a chromophore, such as 11-cis-retinal. The function of…	GO:0007192|adenylate cyclase-activating serotonin receptor signaling pathway;GO:0007268|synaptic transmission;GO:0007623|circadian rhythm;GO:0006939|smooth muscle contraction;GO:0042310|vasoconstriction;	GO:0030425|dendrite;GO:0005887|integral component of plasma membrane;	GO:0004993|serotonin receptor activity;GO:0030594|neurotransmitter receptor activity;	K04163	HTR7; 5-hydroxytryptamine receptor 7
chr19	36056729	36057460	732	36057210	25	8.7716	3.67825	4.80333	3_peak_1188	chr19	36057253	36057373	UTR5	ENSMUSG00000024798	Htr7	gi|569006447|ref|XP_006526764.1|	2372	0	PREDICTED: 5-hydroxytryptamine receptor 7 isoform X1 [Mus musculus]	gi|74226455|dbj|AK139197.1|	3130	0	Mus musculus 7 days neonate cerebellum cDNA, RIKEN full-length enriched library, clone:A730064F17 product:5-hydroxytryptamine (serotonin) receptor 7, full insert sequence	P32304	316	1e-98	5-hydroxytryptamine receptor 7	.	.	.	.	pfam00001	7tm_1	7 transmembrane receptor (rhodopsin family). This family contains, amongst other G-protein-coupled receptors (GCPRs), members of the opsin family, which have been considered to be typical members of the rhodopsin superfamily. They share several motifs, mainly the seven transmembrane helices, GCPRs of the rhodopsin superfamily. All opsins bind a chromophore, such as 11-cis-retinal. The function of…	GO:0007192|adenylate cyclase-activating serotonin receptor signaling pathway;GO:0007268|synaptic transmission;GO:0007623|circadian rhythm;GO:0006939|smooth muscle contraction;GO:0042310|vasoconstriction;	GO:0030425|dendrite;GO:0005887|integral component of plasma membrane;	GO:0004993|serotonin receptor activity;GO:0030594|neurotransmitter receptor activity;	K04163	HTR7; 5-hydroxytryptamine receptor 7
chr19	36056729	36057460	732	36057210	25	8.7716	3.67825	4.80333	3_peak_1188	chr19	36057253	36057507	UTR5	ENSMUSG00000024798	Htr7	gi|569006447|ref|XP_006526764.1|	2372	0	PREDICTED: 5-hydroxytryptamine receptor 7 isoform X1 [Mus musculus]	gi|74226455|dbj|AK139197.1|	3130	0	Mus musculus 7 days neonate cerebellum cDNA, RIKEN full-length enriched library, clone:A730064F17 product:5-hydroxytryptamine (serotonin) receptor 7, full insert sequence	P32304	316	1e-98	5-hydroxytryptamine receptor 7	.	.	.	.	pfam00001	7tm_1	7 transmembrane receptor (rhodopsin family). This family contains, amongst other G-protein-coupled receptors (GCPRs), members of the opsin family, which have been considered to be typical members of the rhodopsin superfamily. They share several motifs, mainly the seven transmembrane helices, GCPRs of the rhodopsin superfamily. All opsins bind a chromophore, such as 11-cis-retinal. The function of…	GO:0007192|adenylate cyclase-activating serotonin receptor signaling pathway;GO:0007268|synaptic transmission;GO:0007623|circadian rhythm;GO:0006939|smooth muscle contraction;GO:0042310|vasoconstriction;	GO:0030425|dendrite;GO:0005887|integral component of plasma membrane;	GO:0004993|serotonin receptor activity;GO:0030594|neurotransmitter receptor activity;	K04163	HTR7; 5-hydroxytryptamine receptor 7
chr8	7100069	7100562	494	7100344	21	8.43365	3.95457	4.52042	3_peak_2396	-//-	-//-	-//-	--//--
chr5	106119345	106119987	643	106119695	45	15.4891	4.06427	10.8119	3_peak_1926	-//-	-//-	-//-	--//--
chr18	37437146	37437663	518	37437273	14	5.78436	3.54585	2.42315	3_peak_1095	chr18	37437547	37439547	Upstream2k	ENSMUSG00000103985	Gm37446	gi|18087787|ref|NP_444367.1|	2922	0	protocadherin beta 12 precursor [Mus musculus]	gi|9558585|gb|AC020967.2|AC020967	4136	0	Mus musculus chromosome 18 clone RP23-161O8, complete sequence	Q63418	991	0	Protocadherin-3	.	.	.	.	pfam08266	Cadherin_2	Cadherin-like. This cadherin domain is usually the most N-terminal copy of the domain.	GO:0007156|homophilic cell adhesion via plasma membrane adhesion molecules;	GO:0016021|integral component of membrane;GO:0005886|plasma membrane;	GO:0005509|calcium ion binding;	K16494	PCDHB; protocadherin beta
chr18	37437146	37437663	518	37437273	14	5.78436	3.54585	2.42315	3_peak_1095	chr18	37433411	37437547	Exon	ENSMUSG00000103985	Gm37446	gi|18087787|ref|NP_444367.1|	2922	0	protocadherin beta 12 precursor [Mus musculus]	gi|9558585|gb|AC020967.2|AC020967	4136	0	Mus musculus chromosome 18 clone RP23-161O8, complete sequence	Q63418	991	0	Protocadherin-3	.	.	.	.	pfam08266	Cadherin_2	Cadherin-like. This cadherin domain is usually the most N-terminal copy of the domain.	GO:0007156|homophilic cell adhesion via plasma membrane adhesion molecules;	GO:0016021|integral component of membrane;GO:0005886|plasma membrane;	GO:0005509|calcium ion binding;	K16494	PCDHB; protocadherin beta
chr18	37437146	37437663	518	37437273	14	5.78436	3.54585	2.42315	3_peak_1095	chr18	37435620	37438654	Exon	ENSMUSG00000043458	Pcdhb12	gi|18087787|ref|NP_444367.1|	3782	0	protocadherin beta 12 precursor [Mus musculus]	gi|148613869|ref|NM_053137.2|	3034	0	Mus musculus protocadherin beta 12 (Pcdhb12), mRNA	Q63418	1292	0	Protocadherin-3	.	.	.	.	pfam08266	Cadherin_2	Cadherin-like. This cadherin domain is usually the most N-terminal copy of the domain.	GO:0007156|homophilic cell adhesion via plasma membrane adhesion molecules;	GO:0016021|integral component of membrane;GO:0005886|plasma membrane;	GO:0005509|calcium ion binding;	K16494	PCDHB; protocadherin beta
chr18	37437146	37437663	518	37437273	14	5.78436	3.54585	2.42315	3_peak_1095	chr18	36955150	37825020	Intron	ENSMUSG00000103458	Gm42416	gi|292658765|ref|NP_001167625.1|	4617	0	protocadherin alpha 4-gamma precursor [Mus musculus]	gi|669174609|ref|NM_001174154.2|	2856	0	Mus musculus predicted gene, 37013 (Gm37013), mRNA	O88689	1586	0	Protocadherin alpha-4	.	.	.	.	pfam08266	Cadherin_2	Cadherin-like. This cadherin domain is usually the most N-terminal copy of the domain.	GO:0007156|homophilic cell adhesion via plasma membrane adhesion molecules;	GO:0005783|endoplasmic reticulum;GO:0016021|integral component of membrane;GO:0016020|membrane;GO:0005886|plasma membrane;GO:0045202|synapse;	GO:0005509|calcium ion binding;	K16493	PCDHA; protocadherin alpha
chr18	37437146	37437663	518	37437273	14	5.78436	3.54585	2.42315	3_peak_1095	chr18	36970137	37825020	Intron	ENSMUSG00000102836	Gm37013	gi|22164140|gb|AAM93575.1|	542	2e-69	protocadherin [Mus musculus]	gi|669203812|ref|NM_001301256.1|	313	8e-162	Mus musculus predicted gene, 38666 (Gm38666), mRNA	Q9UN73	145	1e-39	Protocadherin alpha-6	.	.	.	.	pfam15064	CATSPERG	Cation channel sperm-associated protein subunit gamma. This family represents the gamma subunit of the CATSPER, or cation channel sperm-associated protein complex. The complex appears only to be expressed in the flagellum of sperm. The complex is activated at alkaline intracellular pH, and being restricted to the flagellum is the mediating calcium channel.	GO:0007155|cell adhesion;GO:0007156|homophilic cell adhesion via plasma membrane adhesion molecules;GO:0007399|nervous system development;	GO:0005576|extracellular region;GO:0005887|integral component of plasma membrane;	GO:0005509|calcium ion binding;	K16493	PCDHA; protocadherin alpha
chr18	37437146	37437663	518	37437273	14	5.78436	3.54585	2.42315	3_peak_1095	chr18	36976278	37825020	Intron	ENSMUSG00000103125	Gm37388	gi|22164142|gb|AAM93576.1|	637	1e-82	protocadherin [Mus musculus]	gi|669174607|ref|NM_001301259.1|	429	0	Mus musculus predicted gene, 38667 (Gm38667), mRNA	Q5DRE7	170	5e-48	Protocadherin alpha-5	.	.	.	.	pfam11941	DUF3459	Domain of unknown function (DUF3459). This presumed domain is functionally uncharacterized. This domain is found in bacteria. This domain is about 110 amino acids in length. This domain is found associated with pfam00128, pfam02922.	GO:0007156|homophilic cell adhesion via plasma membrane adhesion molecules;	GO:0016021|integral component of membrane;GO:0005886|plasma membrane;	GO:0005509|calcium ion binding;	.	.
chr2	22562940	22563664	725	22563165	11	5.21657	3.61359	2.00745	3_peak_1289	chr2	22558420	22564990	Intron	ENSMUSG00000025716	Myo3a	gi|291219940|ref|NP_680779.3|	8326	0	myosin-IIIa [Mus musculus]	gi|291219939|ref|NM_148413.3|	5082	0	Mus musculus myosin IIIA (Myo3a), mRNA	Q8K3H5	411	2e-126	Myosin-IIIa	YOR326w	407	3e-116	COG5022	pfam00063	Myosin_head	Myosin head (motor domain).	GO:0048839|inner ear development;GO:0018105|peptidyl-serine phosphorylation;GO:0018107|peptidyl-threonine phosphorylation;GO:0051491|positive regulation of filopodium assembly;GO:0046777|protein autophosphorylation;GO:0050896|response to stimulus;GO:0007605|sensory perception of sound;GO:0007601|visual perception;	GO:0005737|cytoplasm;GO:0031941|filamentous actin;GO:0030175|filopodium;GO:0032433|filopodium tip;GO:0016459|myosin complex;GO:0001917|photoreceptor inner segment;GO:0032426|stereocilium bundle tip;	GO:0051015|actin filament binding;GO:0030898|actin-dependent ATPase activity;GO:0043531|ADP binding;GO:0005524|ATP binding;GO:0005516|calmodulin binding;GO:0000146|microfilament motor activity;GO:0060002|plus-end directed microfilament motor activity;GO:0004672|protein kinase activity;GO:0004674|protein serine/threonine kinase activity;	.	.
chr10	127090462	127090810	349	127090565	14	5.13019	3.21243	1.94378	3_peak_258	chr10	127090426	127090575	Exon	ENSMUSG00000025422	Agap2	gi|84370300|ref|NP_001028435.1|	3899	0	arf-GAP with GTPase, ANK repeat and PH domain-containing protein 2 isoform 1 [Mus musculus]	gi|666638000|ref|NM_001033263.5|	5633	0	Mus musculus ArfGAP with GTPase domain, ankyrin repeat and PH domain 2 (Agap2), transcript variant 1, mRNA	Q3UHD9	132	2e-29	Arf-GAP with GTPase, ANK repeat and PH domain-containing protein 2	SPAC824.09c	94.4	2e-19	COG5347	pfam01412	ArfGap	Putative GTPase activating protein for Arf. Putative zinc fingers with GTPase activating proteins (GAPs) towards the small GTPase, Arf. The GAP of ARD1 stimulates GTPase hydrolysis for ARD1 but not ARFs.	GO:0015031|protein transport;GO:0007264|small GTPase mediated signal transduction;	GO:0005737|cytoplasm;	GO:0005525|GTP binding;GO:0005096|GTPase activator activity;GO:0046872|metal ion binding;GO:0005543|phospholipid binding;	K12491	AGAP1_3; Arf-GAP with GTPase, ANK repeat and PH domain-containing protein 1/3
chr10	127090462	127090810	349	127090565	14	5.13019	3.21243	1.94378	3_peak_258	chr10	127090575	127090671	Intron	ENSMUSG00000025422	Agap2	gi|84370300|ref|NP_001028435.1|	3899	0	arf-GAP with GTPase, ANK repeat and PH domain-containing protein 2 isoform 1 [Mus musculus]	gi|666638000|ref|NM_001033263.5|	5633	0	Mus musculus ArfGAP with GTPase domain, ankyrin repeat and PH domain 2 (Agap2), transcript variant 1, mRNA	Q3UHD9	132	2e-29	Arf-GAP with GTPase, ANK repeat and PH domain-containing protein 2	SPAC824.09c	94.4	2e-19	COG5347	pfam01412	ArfGap	Putative GTPase activating protein for Arf. Putative zinc fingers with GTPase activating proteins (GAPs) towards the small GTPase, Arf. The GAP of ARD1 stimulates GTPase hydrolysis for ARD1 but not ARFs.	GO:0015031|protein transport;GO:0007264|small GTPase mediated signal transduction;	GO:0005737|cytoplasm;	GO:0005525|GTP binding;GO:0005096|GTPase activator activity;GO:0046872|metal ion binding;GO:0005543|phospholipid binding;	K12491	AGAP1_3; Arf-GAP with GTPase, ANK repeat and PH domain-containing protein 1/3
chr10	127090462	127090810	349	127090565	14	5.13019	3.21243	1.94378	3_peak_258	chr10	127090762	127090874	Intron	ENSMUSG00000025422	Agap2	gi|84370300|ref|NP_001028435.1|	3899	0	arf-GAP with GTPase, ANK repeat and PH domain-containing protein 2 isoform 1 [Mus musculus]	gi|666638000|ref|NM_001033263.5|	5633	0	Mus musculus ArfGAP with GTPase domain, ankyrin repeat and PH domain 2 (Agap2), transcript variant 1, mRNA	Q3UHD9	132	2e-29	Arf-GAP with GTPase, ANK repeat and PH domain-containing protein 2	SPAC824.09c	94.4	2e-19	COG5347	pfam01412	ArfGap	Putative GTPase activating protein for Arf. Putative zinc fingers with GTPase activating proteins (GAPs) towards the small GTPase, Arf. The GAP of ARD1 stimulates GTPase hydrolysis for ARD1 but not ARFs.	GO:0015031|protein transport;GO:0007264|small GTPase mediated signal transduction;	GO:0005737|cytoplasm;	GO:0005525|GTP binding;GO:0005096|GTPase activator activity;GO:0046872|metal ion binding;GO:0005543|phospholipid binding;	K12491	AGAP1_3; Arf-GAP with GTPase, ANK repeat and PH domain-containing protein 1/3
chr10	127090462	127090810	349	127090565	14	5.13019	3.21243	1.94378	3_peak_258	chr10	127090671	127090762	Exon	ENSMUSG00000025422	Agap2	gi|84370300|ref|NP_001028435.1|	3899	0	arf-GAP with GTPase, ANK repeat and PH domain-containing protein 2 isoform 1 [Mus musculus]	gi|666638000|ref|NM_001033263.5|	5633	0	Mus musculus ArfGAP with GTPase domain, ankyrin repeat and PH domain 2 (Agap2), transcript variant 1, mRNA	Q3UHD9	132	2e-29	Arf-GAP with GTPase, ANK repeat and PH domain-containing protein 2	SPAC824.09c	94.4	2e-19	COG5347	pfam01412	ArfGap	Putative GTPase activating protein for Arf. Putative zinc fingers with GTPase activating proteins (GAPs) towards the small GTPase, Arf. The GAP of ARD1 stimulates GTPase hydrolysis for ARD1 but not ARFs.	GO:0015031|protein transport;GO:0007264|small GTPase mediated signal transduction;	GO:0005737|cytoplasm;	GO:0005525|GTP binding;GO:0005096|GTPase activator activity;GO:0046872|metal ion binding;GO:0005543|phospholipid binding;	K12491	AGAP1_3; Arf-GAP with GTPase, ANK repeat and PH domain-containing protein 1/3
chr7	63444359	63445151	793	63445009	17	6.58307	3.5897	3.02381	3_peak_2232	chr7	63443562	63444529	Exon	ENSMUSG00000097682	4930554H23Rik	gi|148675323|gb|EDL07270.1|	461	7e-51	mCG67596 [Mus musculus]	gi|767172219|ref|NR_131089.1|	2540	0	Mus musculus RIKEN cDNA 4930554H23 gene (4930554H23Rik), long non-coding RNA	.	.	.	.	.	.	.	.	pfam12449	DUF3684	Protein of unknown function (DUF3684). This domain family is found in eukaryotes, and is typically between 1072 and 1090 amino acids in length.	.	.	.	.	.
chr7	63444359	63445151	793	63445009	17	6.58307	3.5897	3.02381	3_peak_2232	chr7	63444750	63444927	Exon	ENSMUSG00000033510	Otud7a	gi|18700018|ref|NP_570950.1|	3761	0	OTU domain-containing protein 7A [Mus musculus]	gi|18700017|ref|NM_130880.1|	3461	0	Mus musculus OTU domain containing 7A (Otud7a), mRNA	Q8R554	1453	0	OTU domain-containing protein 7A	.	.	.	.	pfam02338	OTU	OTU-like cysteine protease. This family is comprised of a group of predicted cysteine proteases, homologous to the Ovarian tumor (OTU) gene in Drosophila. Members include proteins from eukaryotes, viruses and pathogenic bacterium. The conserved cysteine and histidine, and possibly the aspartate, represent the catalytic residues in this putative group of proteases.	GO:0006955|immune response;GO:0043124|negative regulation of I-kappaB kinase/NF-kappaB signaling;GO:0071947|protein deubiquitination involved in ubiquitin-dependent protein catabolic process;GO:0035871|protein K11-linked deubiquitination;GO:0071108|protein K48-linked deubiquitination;GO:0070536|protein K63-linked deubiquitination;GO:0050727|regulation of inflammatory response;GO:0045088|regulatio…	GO:0005737|cytoplasm;GO:0005634|nucleus;	GO:0003677|DNA binding;GO:0070530|K63-linked polyubiquitin binding;GO:0004843|ubiquitin-specific protease activity;GO:0008270|zinc ion binding;	K11860	OTUD7A_B; OTU domain-containing protein 7 [EC:3.4.19.12]
chr7	63444359	63445151	793	63445009	17	6.58307	3.5897	3.02381	3_peak_2232	chr7	63444776	63444927	Exon	ENSMUSG00000033510	Otud7a	gi|18700018|ref|NP_570950.1|	3761	0	OTU domain-containing protein 7A [Mus musculus]	gi|18700017|ref|NM_130880.1|	3461	0	Mus musculus OTU domain containing 7A (Otud7a), mRNA	Q8R554	1453	0	OTU domain-containing protein 7A	.	.	.	.	pfam02338	OTU	OTU-like cysteine protease. This family is comprised of a group of predicted cysteine proteases, homologous to the Ovarian tumor (OTU) gene in Drosophila. Members include proteins from eukaryotes, viruses and pathogenic bacterium. The conserved cysteine and histidine, and possibly the aspartate, represent the catalytic residues in this putative group of proteases.	GO:0006955|immune response;GO:0043124|negative regulation of I-kappaB kinase/NF-kappaB signaling;GO:0071947|protein deubiquitination involved in ubiquitin-dependent protein catabolic process;GO:0035871|protein K11-linked deubiquitination;GO:0071108|protein K48-linked deubiquitination;GO:0070536|protein K63-linked deubiquitination;GO:0050727|regulation of inflammatory response;GO:0045088|regulatio…	GO:0005737|cytoplasm;GO:0005634|nucleus;	GO:0003677|DNA binding;GO:0070530|K63-linked polyubiquitin binding;GO:0004843|ubiquitin-specific protease activity;GO:0008270|zinc ion binding;	K11860	OTUD7A_B; OTU domain-containing protein 7 [EC:3.4.19.12]
chr7	63444359	63445151	793	63445009	17	6.58307	3.5897	3.02381	3_peak_2232	chr7	63444529	63446529	Upstream2k	ENSMUSG00000097682	4930554H23Rik	gi|148675323|gb|EDL07270.1|	461	7e-51	mCG67596 [Mus musculus]	gi|767172219|ref|NR_131089.1|	2540	0	Mus musculus RIKEN cDNA 4930554H23 gene (4930554H23Rik), long non-coding RNA	.	.	.	.	.	.	.	.	pfam12449	DUF3684	Protein of unknown function (DUF3684). This domain family is found in eukaryotes, and is typically between 1072 and 1090 amino acids in length.	.	.	.	.	.
chr7	63444359	63445151	793	63445009	17	6.58307	3.5897	3.02381	3_peak_2232	chr7	63442750	63444750	Upstream2k	ENSMUSG00000033510	Otud7a	gi|18700018|ref|NP_570950.1|	3761	0	OTU domain-containing protein 7A [Mus musculus]	gi|18700017|ref|NM_130880.1|	3461	0	Mus musculus OTU domain containing 7A (Otud7a), mRNA	Q8R554	1453	0	OTU domain-containing protein 7A	.	.	.	.	pfam02338	OTU	OTU-like cysteine protease. This family is comprised of a group of predicted cysteine proteases, homologous to the Ovarian tumor (OTU) gene in Drosophila. Members include proteins from eukaryotes, viruses and pathogenic bacterium. The conserved cysteine and histidine, and possibly the aspartate, represent the catalytic residues in this putative group of proteases.	GO:0006955|immune response;GO:0043124|negative regulation of I-kappaB kinase/NF-kappaB signaling;GO:0071947|protein deubiquitination involved in ubiquitin-dependent protein catabolic process;GO:0035871|protein K11-linked deubiquitination;GO:0071108|protein K48-linked deubiquitination;GO:0070536|protein K63-linked deubiquitination;GO:0050727|regulation of inflammatory response;GO:0045088|regulatio…	GO:0005737|cytoplasm;GO:0005634|nucleus;	GO:0003677|DNA binding;GO:0070530|K63-linked polyubiquitin binding;GO:0004843|ubiquitin-specific protease activity;GO:0008270|zinc ion binding;	K11860	OTUD7A_B; OTU domain-containing protein 7 [EC:3.4.19.12]
chr7	63444359	63445151	793	63445009	17	6.58307	3.5897	3.02381	3_peak_2232	chr7	63442776	63444776	Upstream2k	ENSMUSG00000033510	Otud7a	gi|18700018|ref|NP_570950.1|	3761	0	OTU domain-containing protein 7A [Mus musculus]	gi|18700017|ref|NM_130880.1|	3461	0	Mus musculus OTU domain containing 7A (Otud7a), mRNA	Q8R554	1453	0	OTU domain-containing protein 7A	.	.	.	.	pfam02338	OTU	OTU-like cysteine protease. This family is comprised of a group of predicted cysteine proteases, homologous to the Ovarian tumor (OTU) gene in Drosophila. Members include proteins from eukaryotes, viruses and pathogenic bacterium. The conserved cysteine and histidine, and possibly the aspartate, represent the catalytic residues in this putative group of proteases.	GO:0006955|immune response;GO:0043124|negative regulation of I-kappaB kinase/NF-kappaB signaling;GO:0071947|protein deubiquitination involved in ubiquitin-dependent protein catabolic process;GO:0035871|protein K11-linked deubiquitination;GO:0071108|protein K48-linked deubiquitination;GO:0070536|protein K63-linked deubiquitination;GO:0050727|regulation of inflammatory response;GO:0045088|regulatio…	GO:0005737|cytoplasm;GO:0005634|nucleus;	GO:0003677|DNA binding;GO:0070530|K63-linked polyubiquitin binding;GO:0004843|ubiquitin-specific protease activity;GO:0008270|zinc ion binding;	K11860	OTUD7A_B; OTU domain-containing protein 7 [EC:3.4.19.12]
chr7	63444359	63445151	793	63445009	17	6.58307	3.5897	3.02381	3_peak_2232	chr7	63444750	63444927	UTR5	ENSMUSG00000033510	Otud7a	gi|18700018|ref|NP_570950.1|	3761	0	OTU domain-containing protein 7A [Mus musculus]	gi|18700017|ref|NM_130880.1|	3461	0	Mus musculus OTU domain containing 7A (Otud7a), mRNA	Q8R554	1453	0	OTU domain-containing protein 7A	.	.	.	.	pfam02338	OTU	OTU-like cysteine protease. This family is comprised of a group of predicted cysteine proteases, homologous to the Ovarian tumor (OTU) gene in Drosophila. Members include proteins from eukaryotes, viruses and pathogenic bacterium. The conserved cysteine and histidine, and possibly the aspartate, represent the catalytic residues in this putative group of proteases.	GO:0006955|immune response;GO:0043124|negative regulation of I-kappaB kinase/NF-kappaB signaling;GO:0071947|protein deubiquitination involved in ubiquitin-dependent protein catabolic process;GO:0035871|protein K11-linked deubiquitination;GO:0071108|protein K48-linked deubiquitination;GO:0070536|protein K63-linked deubiquitination;GO:0050727|regulation of inflammatory response;GO:0045088|regulatio…	GO:0005737|cytoplasm;GO:0005634|nucleus;	GO:0003677|DNA binding;GO:0070530|K63-linked polyubiquitin binding;GO:0004843|ubiquitin-specific protease activity;GO:0008270|zinc ion binding;	K11860	OTUD7A_B; OTU domain-containing protein 7 [EC:3.4.19.12]
chr7	63444359	63445151	793	63445009	17	6.58307	3.5897	3.02381	3_peak_2232	chr7	63444927	63615288	Intron	ENSMUSG00000033510	Otud7a	gi|18700018|ref|NP_570950.1|	3761	0	OTU domain-containing protein 7A [Mus musculus]	gi|18700017|ref|NM_130880.1|	3461	0	Mus musculus OTU domain containing 7A (Otud7a), mRNA	Q8R554	1453	0	OTU domain-containing protein 7A	.	.	.	.	pfam02338	OTU	OTU-like cysteine protease. This family is comprised of a group of predicted cysteine proteases, homologous to the Ovarian tumor (OTU) gene in Drosophila. Members include proteins from eukaryotes, viruses and pathogenic bacterium. The conserved cysteine and histidine, and possibly the aspartate, represent the catalytic residues in this putative group of proteases.	GO:0006955|immune response;GO:0043124|negative regulation of I-kappaB kinase/NF-kappaB signaling;GO:0071947|protein deubiquitination involved in ubiquitin-dependent protein catabolic process;GO:0035871|protein K11-linked deubiquitination;GO:0071108|protein K48-linked deubiquitination;GO:0070536|protein K63-linked deubiquitination;GO:0050727|regulation of inflammatory response;GO:0045088|regulatio…	GO:0005737|cytoplasm;GO:0005634|nucleus;	GO:0003677|DNA binding;GO:0070530|K63-linked polyubiquitin binding;GO:0004843|ubiquitin-specific protease activity;GO:0008270|zinc ion binding;	K11860	OTUD7A_B; OTU domain-containing protein 7 [EC:3.4.19.12]
chr3	88207808	88208291	484	88208213	61	8.12187	2.19806	4.25894	3_peak_1535b	chr3	88207354	88209634	Intron	ENSMUSG00000097156	Gm3764	gi|148683364|gb|EDL15311.1|	591	1e-74	mCG8840, partial [Mus musculus]	gi|644988004|tpe|HG978949.1|	2203	0	TPA: Mus musculus long non-coding RNA OTTMUST00000112770.1 (RP23-168E14.7 gene), lincRNA	.	.	.	.	.	.	.	.	pfam04654	DUF599	Protein of unknown function, DUF599. This family includes several uncharacterized proteins.	.	.	.	.	.
chr3	88207808	88208291	484	88208213	61	8.12187	2.19806	4.25894	3_peak_1535b	chr3	88207471	88209471	Upstream2k	ENSMUSG00000097156	Gm3764	gi|148683364|gb|EDL15311.1|	591	1e-74	mCG8840, partial [Mus musculus]	gi|644988004|tpe|HG978949.1|	2203	0	TPA: Mus musculus long non-coding RNA OTTMUST00000112770.1 (RP23-168E14.7 gene), lincRNA	.	.	.	.	.	.	.	.	pfam04654	DUF599	Protein of unknown function, DUF599. This family includes several uncharacterized proteins.	.	.	.	.	.
chr4	148859225	148859560	336	148859378	32	12.0527	4.14448	7.6778	3_peak_1809	chr4	148838420	148890321	Intron	ENSMUSG00000028977	Casz1	gi|568931862|ref|XP_006539223.1|	7873	0	PREDICTED: zinc finger protein castor homolog 1 isoform X3 [Mus musculus]	gi|226823369|ref|NM_001159344.1|	7926	0	Mus musculus castor zinc finger 1 (Casz1), transcript variant 1, mRNA	Q9CWL2	1995	0	Zinc finger protein castor homolog 1	.	.	.	.	pfam15498	Dendrin	Nephrin and CD2AP-binding protein, Dendrin. Dendrin is a family of eukaryotic proteins found in the podocytes of the kidneys. Dendrin, originally identified in telencephalic dendrites, is a constituent of the slit diaphragm, SD, complex of podocytes, where it directly binds to nephrin and CD2AP. Kidney podocytes and their slit diaphragms (SDs) form the final barrier to urinary protein loss. SD pr…	GO:0007417|central nervous system development;GO:1902870|negative regulation of amacrine cell differentiation;GO:0045665|negative regulation of neuron differentiation;GO:0060226|negative regulation of retinal cone cell fate commitment;GO:0006355|regulation of transcription, DNA-templated;GO:0060040|retinal bipolar neuron differentiation;GO:0060223|retinal rod cell fate commitment;GO:0006351|trans…	GO:0005737|cytoplasm;GO:0043231|intracellular membrane-bounded organelle;GO:0005654|nucleoplasm;GO:0005634|nucleus;	GO:0003677|DNA binding;GO:0046872|metal ion binding;	.	.
chrX	69360555	69360955	401	69360698	16	8.36391	4.61773	4.46191	3_peak_2719	chrX	69360293	69360838	Exon	ENSMUSG00000031189	Aff2	gi|153792808|ref|NP_032058.2|	5299	0	AF4/FMR2 family member 2 [Mus musculus]	gi|153792807|ref|NM_008032.3|	4486	0	Mus musculus AF4/FMR2 family, member 2 (Aff2), mRNA	O55112	2045	0	AF4/FMR2 family member 2	.	.	.	.	pfam05110	AF-4	AF-4 proto-oncoprotein. This family consists of AF4 (Proto-oncogene AF4) and FMR2 (Fragile X E mental retardation syndrome) nuclear proteins. These proteins have been linked to human diseases such as acute lymphoblastic leukaemia and mental retardation. The family also contains a Drosophila AF4 protein homologue Lilliputian which contains an AT-hook domain. Lilliputian represents a novel pair-rul…	GO:0007611|learning or memory;GO:0006397|mRNA processing;GO:0043484|regulation of RNA splicing;GO:0008380|RNA splicing;	GO:0016607|nuclear speck;	GO:0002151|G-quadruplex RNA binding;	K15194	AFF2; AF4/FMR2 family member 2
chrX	69360555	69360955	401	69360698	16	8.36391	4.61773	4.46191	3_peak_2719	chrX	69360504	69360838	Exon	ENSMUSG00000031189	Aff2	gi|153792808|ref|NP_032058.2|	5299	0	AF4/FMR2 family member 2 [Mus musculus]	gi|153792807|ref|NM_008032.3|	4486	0	Mus musculus AF4/FMR2 family, member 2 (Aff2), mRNA	O55112	2045	0	AF4/FMR2 family member 2	.	.	.	.	pfam05110	AF-4	AF-4 proto-oncoprotein. This family consists of AF4 (Proto-oncogene AF4) and FMR2 (Fragile X E mental retardation syndrome) nuclear proteins. These proteins have been linked to human diseases such as acute lymphoblastic leukaemia and mental retardation. The family also contains a Drosophila AF4 protein homologue Lilliputian which contains an AT-hook domain. Lilliputian represents a novel pair-rul…	GO:0007611|learning or memory;GO:0006397|mRNA processing;GO:0043484|regulation of RNA splicing;GO:0008380|RNA splicing;	GO:0016607|nuclear speck;	GO:0002151|G-quadruplex RNA binding;	K15194	AFF2; AF4/FMR2 family member 2
chrX	69360555	69360955	401	69360698	16	8.36391	4.61773	4.46191	3_peak_2719	chrX	69360699	69360838	Exon	ENSMUSG00000031189	Aff2	gi|153792808|ref|NP_032058.2|	5299	0	AF4/FMR2 family member 2 [Mus musculus]	gi|153792807|ref|NM_008032.3|	4486	0	Mus musculus AF4/FMR2 family, member 2 (Aff2), mRNA	O55112	2045	0	AF4/FMR2 family member 2	.	.	.	.	pfam05110	AF-4	AF-4 proto-oncoprotein. This family consists of AF4 (Proto-oncogene AF4) and FMR2 (Fragile X E mental retardation syndrome) nuclear proteins. These proteins have been linked to human diseases such as acute lymphoblastic leukaemia and mental retardation. The family also contains a Drosophila AF4 protein homologue Lilliputian which contains an AT-hook domain. Lilliputian represents a novel pair-rul…	GO:0007611|learning or memory;GO:0006397|mRNA processing;GO:0043484|regulation of RNA splicing;GO:0008380|RNA splicing;	GO:0016607|nuclear speck;	GO:0002151|G-quadruplex RNA binding;	K15194	AFF2; AF4/FMR2 family member 2
chrX	69360555	69360955	401	69360698	16	8.36391	4.61773	4.46191	3_peak_2719	chrX	69358584	69361148	Intron	ENSMUSG00000086676	Gm14705	gi|148694654|gb|EDL26601.1|	333	7e-34	mCG145427, partial [Mus musculus]	gi|644985864|tpe|HG982413.1|	1824	0	TPA: Mus musculus long non-coding RNA OTTMUST00000043019.1 (RP23-207B22.1 gene), antisense	.	.	.	.	.	.	.	.	pfam00314	Thaumatin	Thaumatin family.	.	.	.	.	.
chrX	69360555	69360955	401	69360698	16	8.36391	4.61773	4.46191	3_peak_2719	chrX	69360341	69362341	Upstream2k	ENSMUSG00000086676	Gm14705	gi|148694654|gb|EDL26601.1|	333	7e-34	mCG145427, partial [Mus musculus]	gi|644985864|tpe|HG982413.1|	1824	0	TPA: Mus musculus long non-coding RNA OTTMUST00000043019.1 (RP23-207B22.1 gene), antisense	.	.	.	.	.	.	.	.	pfam00314	Thaumatin	Thaumatin family.	.	.	.	.	.
chrX	69360555	69360955	401	69360698	16	8.36391	4.61773	4.46191	3_peak_2719	chrX	69358699	69360699	Upstream2k	ENSMUSG00000031189	Aff2	gi|153792808|ref|NP_032058.2|	5299	0	AF4/FMR2 family member 2 [Mus musculus]	gi|153792807|ref|NM_008032.3|	4486	0	Mus musculus AF4/FMR2 family, member 2 (Aff2), mRNA	O55112	2045	0	AF4/FMR2 family member 2	.	.	.	.	pfam05110	AF-4	AF-4 proto-oncoprotein. This family consists of AF4 (Proto-oncogene AF4) and FMR2 (Fragile X E mental retardation syndrome) nuclear proteins. These proteins have been linked to human diseases such as acute lymphoblastic leukaemia and mental retardation. The family also contains a Drosophila AF4 protein homologue Lilliputian which contains an AT-hook domain. Lilliputian represents a novel pair-rul…	GO:0007611|learning or memory;GO:0006397|mRNA processing;GO:0043484|regulation of RNA splicing;GO:0008380|RNA splicing;	GO:0016607|nuclear speck;	GO:0002151|G-quadruplex RNA binding;	K15194	AFF2; AF4/FMR2 family member 2
chrX	69360555	69360955	401	69360698	16	8.36391	4.61773	4.46191	3_peak_2719	chrX	69360293	69360791	UTR5	ENSMUSG00000031189	Aff2	gi|153792808|ref|NP_032058.2|	5299	0	AF4/FMR2 family member 2 [Mus musculus]	gi|153792807|ref|NM_008032.3|	4486	0	Mus musculus AF4/FMR2 family, member 2 (Aff2), mRNA	O55112	2045	0	AF4/FMR2 family member 2	.	.	.	.	pfam05110	AF-4	AF-4 proto-oncoprotein. This family consists of AF4 (Proto-oncogene AF4) and FMR2 (Fragile X E mental retardation syndrome) nuclear proteins. These proteins have been linked to human diseases such as acute lymphoblastic leukaemia and mental retardation. The family also contains a Drosophila AF4 protein homologue Lilliputian which contains an AT-hook domain. Lilliputian represents a novel pair-rul…	GO:0007611|learning or memory;GO:0006397|mRNA processing;GO:0043484|regulation of RNA splicing;GO:0008380|RNA splicing;	GO:0016607|nuclear speck;	GO:0002151|G-quadruplex RNA binding;	K15194	AFF2; AF4/FMR2 family member 2
chrX	69360555	69360955	401	69360698	16	8.36391	4.61773	4.46191	3_peak_2719	chrX	69360838	69523435	Intron	ENSMUSG00000031189	Aff2	gi|153792808|ref|NP_032058.2|	5299	0	AF4/FMR2 family member 2 [Mus musculus]	gi|153792807|ref|NM_008032.3|	4486	0	Mus musculus AF4/FMR2 family, member 2 (Aff2), mRNA	O55112	2045	0	AF4/FMR2 family member 2	.	.	.	.	pfam05110	AF-4	AF-4 proto-oncoprotein. This family consists of AF4 (Proto-oncogene AF4) and FMR2 (Fragile X E mental retardation syndrome) nuclear proteins. These proteins have been linked to human diseases such as acute lymphoblastic leukaemia and mental retardation. The family also contains a Drosophila AF4 protein homologue Lilliputian which contains an AT-hook domain. Lilliputian represents a novel pair-rul…	GO:0007611|learning or memory;GO:0006397|mRNA processing;GO:0043484|regulation of RNA splicing;GO:0008380|RNA splicing;	GO:0016607|nuclear speck;	GO:0002151|G-quadruplex RNA binding;	K15194	AFF2; AF4/FMR2 family member 2
chr5	76857369	76858831	1463	76858161	22	6.75949	3.1971	3.15462	3_peak_1903b	chr5	76856330	76859145	Exon	ENSMUSG00000036377	C530008M17Rik	gi|568935777|ref|XP_006535073.1|	3738	0	PREDICTED: uncharacterized protein KIAA1211 isoform X6 [Mus musculus]	gi|755512562|ref|XM_006535003.2|	6863	0	PREDICTED: Mus musculus RIKEN cDNA C530008M17 gene (C530008M17Rik), transcript variant X4, mRNA	Q5PR69	59.3	4e-09	Uncharacterized protein KIAA1211	.	.	.	.	pfam15262	DUF4592	Domain of unknown function (DUF4592). This protein family is a domain of unknown function, which lies to the N-terminus of the protein. This domain family is found in eukaryotes, and is typically between 114 and 130 amino acids in length. There are two completely conserved residues (L and A) that may be functionally important. In humans, the gene that encodes this protein lies in the position, ch…	GO:0000480|endonucleolytic cleavage in 5'-ETS of tricistronic rRNA transcript (SSU-rRNA, 5.8S rRNA, LSU-rRNA);GO:0000447|endonucleolytic cleavage in ITS1 to separate SSU-rRNA from 5.8S rRNA and LSU-rRNA from tricistronic rRNA transcript (SSU-rRNA, 5.8S rRNA, LSU-rRNA);GO:0000472|endonucleolytic cleavage to generate mature 5'-end of SSU-rRNA from (SSU-rRNA, 5.8S rRNA, LSU-rRNA);GO:0006357|regulati…	GO:0005730|nucleolus;GO:0005667|transcription factor complex;	GO:0003677|DNA binding;GO:0000166|nucleotide binding;GO:0044822|poly(A) RNA binding;GO:0003723|RNA binding;	.	.
chr5	76857369	76858831	1463	76858161	22	6.75949	3.1971	3.15462	3_peak_1903b	chr5	76856330	76859154	Exon	ENSMUSG00000036377	C530008M17Rik	gi|568935777|ref|XP_006535073.1|	3738	0	PREDICTED: uncharacterized protein KIAA1211 isoform X6 [Mus musculus]	gi|755512562|ref|XM_006535003.2|	6863	0	PREDICTED: Mus musculus RIKEN cDNA C530008M17 gene (C530008M17Rik), transcript variant X4, mRNA	Q5PR69	59.3	4e-09	Uncharacterized protein KIAA1211	.	.	.	.	pfam15262	DUF4592	Domain of unknown function (DUF4592). This protein family is a domain of unknown function, which lies to the N-terminus of the protein. This domain family is found in eukaryotes, and is typically between 114 and 130 amino acids in length. There are two completely conserved residues (L and A) that may be functionally important. In humans, the gene that encodes this protein lies in the position, ch…	GO:0000480|endonucleolytic cleavage in 5'-ETS of tricistronic rRNA transcript (SSU-rRNA, 5.8S rRNA, LSU-rRNA);GO:0000447|endonucleolytic cleavage in ITS1 to separate SSU-rRNA from 5.8S rRNA and LSU-rRNA from tricistronic rRNA transcript (SSU-rRNA, 5.8S rRNA, LSU-rRNA);GO:0000472|endonucleolytic cleavage to generate mature 5'-end of SSU-rRNA from (SSU-rRNA, 5.8S rRNA, LSU-rRNA);GO:0006357|regulati…	GO:0005730|nucleolus;GO:0005667|transcription factor complex;	GO:0003677|DNA binding;GO:0000166|nucleotide binding;GO:0044822|poly(A) RNA binding;GO:0003723|RNA binding;	.	.
chr5	76857369	76858831	1463	76858161	22	6.75949	3.1971	3.15462	3_peak_1903b	chr5	76856841	76858841	Upstream2k	ENSMUSG00000036377	C530008M17Rik	gi|568935777|ref|XP_006535073.1|	3738	0	PREDICTED: uncharacterized protein KIAA1211 isoform X6 [Mus musculus]	gi|755512562|ref|XM_006535003.2|	6863	0	PREDICTED: Mus musculus RIKEN cDNA C530008M17 gene (C530008M17Rik), transcript variant X4, mRNA	Q5PR69	59.3	4e-09	Uncharacterized protein KIAA1211	.	.	.	.	pfam15262	DUF4592	Domain of unknown function (DUF4592). This protein family is a domain of unknown function, which lies to the N-terminus of the protein. This domain family is found in eukaryotes, and is typically between 114 and 130 amino acids in length. There are two completely conserved residues (L and A) that may be functionally important. In humans, the gene that encodes this protein lies in the position, ch…	GO:0000480|endonucleolytic cleavage in 5'-ETS of tricistronic rRNA transcript (SSU-rRNA, 5.8S rRNA, LSU-rRNA);GO:0000447|endonucleolytic cleavage in ITS1 to separate SSU-rRNA from 5.8S rRNA and LSU-rRNA from tricistronic rRNA transcript (SSU-rRNA, 5.8S rRNA, LSU-rRNA);GO:0000472|endonucleolytic cleavage to generate mature 5'-end of SSU-rRNA from (SSU-rRNA, 5.8S rRNA, LSU-rRNA);GO:0006357|regulati…	GO:0005730|nucleolus;GO:0005667|transcription factor complex;	GO:0003677|DNA binding;GO:0000166|nucleotide binding;GO:0044822|poly(A) RNA binding;GO:0003723|RNA binding;	.	.
chr5	76857369	76858831	1463	76857721	21	6.09535	3.02513	2.64383	3_peak_1903a	chr5	76856330	76859145	Exon	ENSMUSG00000036377	C530008M17Rik	gi|568935777|ref|XP_006535073.1|	3738	0	PREDICTED: uncharacterized protein KIAA1211 isoform X6 [Mus musculus]	gi|755512562|ref|XM_006535003.2|	6863	0	PREDICTED: Mus musculus RIKEN cDNA C530008M17 gene (C530008M17Rik), transcript variant X4, mRNA	Q5PR69	59.3	4e-09	Uncharacterized protein KIAA1211	.	.	.	.	pfam15262	DUF4592	Domain of unknown function (DUF4592). This protein family is a domain of unknown function, which lies to the N-terminus of the protein. This domain family is found in eukaryotes, and is typically between 114 and 130 amino acids in length. There are two completely conserved residues (L and A) that may be functionally important. In humans, the gene that encodes this protein lies in the position, ch…	GO:0000480|endonucleolytic cleavage in 5'-ETS of tricistronic rRNA transcript (SSU-rRNA, 5.8S rRNA, LSU-rRNA);GO:0000447|endonucleolytic cleavage in ITS1 to separate SSU-rRNA from 5.8S rRNA and LSU-rRNA from tricistronic rRNA transcript (SSU-rRNA, 5.8S rRNA, LSU-rRNA);GO:0000472|endonucleolytic cleavage to generate mature 5'-end of SSU-rRNA from (SSU-rRNA, 5.8S rRNA, LSU-rRNA);GO:0006357|regulati…	GO:0005730|nucleolus;GO:0005667|transcription factor complex;	GO:0003677|DNA binding;GO:0000166|nucleotide binding;GO:0044822|poly(A) RNA binding;GO:0003723|RNA binding;	.	.
chr5	76857369	76858831	1463	76857721	21	6.09535	3.02513	2.64383	3_peak_1903a	chr5	76856330	76859154	Exon	ENSMUSG00000036377	C530008M17Rik	gi|568935777|ref|XP_006535073.1|	3738	0	PREDICTED: uncharacterized protein KIAA1211 isoform X6 [Mus musculus]	gi|755512562|ref|XM_006535003.2|	6863	0	PREDICTED: Mus musculus RIKEN cDNA C530008M17 gene (C530008M17Rik), transcript variant X4, mRNA	Q5PR69	59.3	4e-09	Uncharacterized protein KIAA1211	.	.	.	.	pfam15262	DUF4592	Domain of unknown function (DUF4592). This protein family is a domain of unknown function, which lies to the N-terminus of the protein. This domain family is found in eukaryotes, and is typically between 114 and 130 amino acids in length. There are two completely conserved residues (L and A) that may be functionally important. In humans, the gene that encodes this protein lies in the position, ch…	GO:0000480|endonucleolytic cleavage in 5'-ETS of tricistronic rRNA transcript (SSU-rRNA, 5.8S rRNA, LSU-rRNA);GO:0000447|endonucleolytic cleavage in ITS1 to separate SSU-rRNA from 5.8S rRNA and LSU-rRNA from tricistronic rRNA transcript (SSU-rRNA, 5.8S rRNA, LSU-rRNA);GO:0000472|endonucleolytic cleavage to generate mature 5'-end of SSU-rRNA from (SSU-rRNA, 5.8S rRNA, LSU-rRNA);GO:0006357|regulati…	GO:0005730|nucleolus;GO:0005667|transcription factor complex;	GO:0003677|DNA binding;GO:0000166|nucleotide binding;GO:0044822|poly(A) RNA binding;GO:0003723|RNA binding;	.	.
chr5	76857369	76858831	1463	76857721	21	6.09535	3.02513	2.64383	3_peak_1903a	chr5	76856841	76858841	Upstream2k	ENSMUSG00000036377	C530008M17Rik	gi|568935777|ref|XP_006535073.1|	3738	0	PREDICTED: uncharacterized protein KIAA1211 isoform X6 [Mus musculus]	gi|755512562|ref|XM_006535003.2|	6863	0	PREDICTED: Mus musculus RIKEN cDNA C530008M17 gene (C530008M17Rik), transcript variant X4, mRNA	Q5PR69	59.3	4e-09	Uncharacterized protein KIAA1211	.	.	.	.	pfam15262	DUF4592	Domain of unknown function (DUF4592). This protein family is a domain of unknown function, which lies to the N-terminus of the protein. This domain family is found in eukaryotes, and is typically between 114 and 130 amino acids in length. There are two completely conserved residues (L and A) that may be functionally important. In humans, the gene that encodes this protein lies in the position, ch…	GO:0000480|endonucleolytic cleavage in 5'-ETS of tricistronic rRNA transcript (SSU-rRNA, 5.8S rRNA, LSU-rRNA);GO:0000447|endonucleolytic cleavage in ITS1 to separate SSU-rRNA from 5.8S rRNA and LSU-rRNA from tricistronic rRNA transcript (SSU-rRNA, 5.8S rRNA, LSU-rRNA);GO:0000472|endonucleolytic cleavage to generate mature 5'-end of SSU-rRNA from (SSU-rRNA, 5.8S rRNA, LSU-rRNA);GO:0006357|regulati…	GO:0005730|nucleolus;GO:0005667|transcription factor complex;	GO:0003677|DNA binding;GO:0000166|nucleotide binding;GO:0044822|poly(A) RNA binding;GO:0003723|RNA binding;	.	.
chr10	112270134	112270549	416	112270263	22	6.72192	3.18322	3.13423	3_peak_251	chr10	112269120	112271120	Upstream2k	ENSMUSG00000035681	Kcnc2	gi|148689808|gb|EDL21755.1|	2689	0	potassium voltage gated channel, Shaw-related subfamily, member 2, isoform CRA_e, partial [Mus musculus]	gi|568967643|ref|XM_006513688.1|	5046	0	PREDICTED: Mus musculus potassium voltage gated channel, Shaw-related subfamily, member 2 (Kcnc2), transcript variant X3, mRNA	P22462	239	3e-73	Potassium voltage-gated channel subfamily C member 2	DR0830	61.2	4e-09	COG1226	pfam02214	BTB_2	BTB/POZ domain. In voltage-gated K+ channels this domain is responsible for subfamily-specific assembly of alpha-subunits into functional tetrameric channels. In KCTD1 this domain functions as a transcriptional repressor. It also mediates homomultimerization of KCTD1 and interaction of KCTD1 with the transcription factor AP-2-alpha.	GO:0001508|action potential;GO:0071732|cellular response to nitric oxide;GO:0038060|nitric oxide-cGMP-mediated signaling pathway;GO:0071805|potassium ion transmembrane transport;GO:0051291|protein heterooligomerization;GO:0051260|protein homooligomerization;	GO:0016324|apical plasma membrane;GO:0030424|axon;GO:0016323|basolateral plasma membrane;GO:0030054|cell junction;GO:0030425|dendrite;GO:0016021|integral component of membrane;GO:0005887|integral component of plasma membrane;GO:0005622|intracellular;GO:0016020|membrane;GO:0032809|neuronal cell body membrane;GO:0043204|perikaryon;GO:0045211|postsynaptic membrane;GO:0042734|presynaptic membrane;GO:…	GO:0005251|delayed rectifier potassium channel activity;GO:0044325|ion channel binding;GO:0005249|voltage-gated potassium channel activity;	K04888	KCNC2; potassium voltage-gated channel Shaw-related subfamily C member 2
chr10	112270134	112270549	416	112270263	22	6.72192	3.18322	3.13423	3_peak_251	chr10	112269120	112271120	Upstream2k	ENSMUSG00000035681	Kcnc2	gi|148689808|gb|EDL21755.1|	2689	0	potassium voltage gated channel, Shaw-related subfamily, member 2, isoform CRA_e, partial [Mus musculus]	gi|568967643|ref|XM_006513688.1|	5046	0	PREDICTED: Mus musculus potassium voltage gated channel, Shaw-related subfamily, member 2 (Kcnc2), transcript variant X3, mRNA	P22462	239	3e-73	Potassium voltage-gated channel subfamily C member 2	DR0830	61.2	4e-09	COG1226	pfam02214	BTB_2	BTB/POZ domain. In voltage-gated K+ channels this domain is responsible for subfamily-specific assembly of alpha-subunits into functional tetrameric channels. In KCTD1 this domain functions as a transcriptional repressor. It also mediates homomultimerization of KCTD1 and interaction of KCTD1 with the transcription factor AP-2-alpha.	GO:0001508|action potential;GO:0071732|cellular response to nitric oxide;GO:0038060|nitric oxide-cGMP-mediated signaling pathway;GO:0071805|potassium ion transmembrane transport;GO:0051291|protein heterooligomerization;GO:0051260|protein homooligomerization;	GO:0016324|apical plasma membrane;GO:0030424|axon;GO:0016323|basolateral plasma membrane;GO:0030054|cell junction;GO:0030425|dendrite;GO:0016021|integral component of membrane;GO:0005887|integral component of plasma membrane;GO:0005622|intracellular;GO:0016020|membrane;GO:0032809|neuronal cell body membrane;GO:0043204|perikaryon;GO:0045211|postsynaptic membrane;GO:0042734|presynaptic membrane;GO:…	GO:0005251|delayed rectifier potassium channel activity;GO:0044325|ion channel binding;GO:0005249|voltage-gated potassium channel activity;	K04888	KCNC2; potassium voltage-gated channel Shaw-related subfamily C member 2
chr16	67620029	67620380	352	67620303	22	8.32965	3.80209	4.43308	3_peak_959	chr16	67620170	67620493	Exon	ENSMUSG00000064115	Cadm2	gi|225543375|ref|NP_848836.2|	2088	0	cell adhesion molecule 2 isoform 1 precursor [Mus musculus]	gi|225543374|ref|NM_178721.4|	9564	0	Mus musculus cell adhesion molecule 2 (Cadm2), transcript variant 1, mRNA	Q8BLQ9	790	0	Cell adhesion molecule 2	.	.	.	.	pfam08205	C2-set_2	CD80-like C2-set immunoglobulin domain. These domains belong to the immunoglobulin superfamily.	GO:0008037|cell recognition;GO:0007157|heterophilic cell-cell adhesion via plasma membrane cell adhesion molecules;GO:0007156|homophilic cell adhesion via plasma membrane adhesion molecules;	GO:0030424|axon;GO:0005913|cell-cell adherens junction;GO:0005887|integral component of plasma membrane;GO:0045202|synapse;	GO:0050839|cell adhesion molecule binding;GO:0042803|protein homodimerization activity;GO:0004872|receptor activity;GO:0005102|receptor binding;	K06782	CADM2, IGSF4D, NECL3; cell adhesion molecule 2
chr16	67620029	67620380	352	67620303	22	8.32965	3.80209	4.43308	3_peak_959	chr16	67620170	67620823	Exon	ENSMUSG00000064115	Cadm2	gi|225543375|ref|NP_848836.2|	2088	0	cell adhesion molecule 2 isoform 1 precursor [Mus musculus]	gi|225543374|ref|NM_178721.4|	9564	0	Mus musculus cell adhesion molecule 2 (Cadm2), transcript variant 1, mRNA	Q8BLQ9	790	0	Cell adhesion molecule 2	.	.	.	.	pfam08205	C2-set_2	CD80-like C2-set immunoglobulin domain. These domains belong to the immunoglobulin superfamily.	GO:0008037|cell recognition;GO:0007157|heterophilic cell-cell adhesion via plasma membrane cell adhesion molecules;GO:0007156|homophilic cell adhesion via plasma membrane adhesion molecules;	GO:0030424|axon;GO:0005913|cell-cell adherens junction;GO:0005887|integral component of plasma membrane;GO:0045202|synapse;	GO:0050839|cell adhesion molecule binding;GO:0042803|protein homodimerization activity;GO:0004872|receptor activity;GO:0005102|receptor binding;	K06782	CADM2, IGSF4D, NECL3; cell adhesion molecule 2
chr16	67620029	67620380	352	67620303	22	8.32965	3.80209	4.43308	3_peak_959	chr16	67620170	67620908	Exon	ENSMUSG00000064115	Cadm2	gi|225543375|ref|NP_848836.2|	2088	0	cell adhesion molecule 2 isoform 1 precursor [Mus musculus]	gi|225543374|ref|NM_178721.4|	9564	0	Mus musculus cell adhesion molecule 2 (Cadm2), transcript variant 1, mRNA	Q8BLQ9	790	0	Cell adhesion molecule 2	.	.	.	.	pfam08205	C2-set_2	CD80-like C2-set immunoglobulin domain. These domains belong to the immunoglobulin superfamily.	GO:0008037|cell recognition;GO:0007157|heterophilic cell-cell adhesion via plasma membrane cell adhesion molecules;GO:0007156|homophilic cell adhesion via plasma membrane adhesion molecules;	GO:0030424|axon;GO:0005913|cell-cell adherens junction;GO:0005887|integral component of plasma membrane;GO:0045202|synapse;	GO:0050839|cell adhesion molecule binding;GO:0042803|protein homodimerization activity;GO:0004872|receptor activity;GO:0005102|receptor binding;	K06782	CADM2, IGSF4D, NECL3; cell adhesion molecule 2
chr16	67620029	67620380	352	67620303	22	8.32965	3.80209	4.43308	3_peak_959	chr16	67620231	67620493	UTR5	ENSMUSG00000064115	Cadm2	gi|225543375|ref|NP_848836.2|	2088	0	cell adhesion molecule 2 isoform 1 precursor [Mus musculus]	gi|225543374|ref|NM_178721.4|	9564	0	Mus musculus cell adhesion molecule 2 (Cadm2), transcript variant 1, mRNA	Q8BLQ9	790	0	Cell adhesion molecule 2	.	.	.	.	pfam08205	C2-set_2	CD80-like C2-set immunoglobulin domain. These domains belong to the immunoglobulin superfamily.	GO:0008037|cell recognition;GO:0007157|heterophilic cell-cell adhesion via plasma membrane cell adhesion molecules;GO:0007156|homophilic cell adhesion via plasma membrane adhesion molecules;	GO:0030424|axon;GO:0005913|cell-cell adherens junction;GO:0005887|integral component of plasma membrane;GO:0045202|synapse;	GO:0050839|cell adhesion molecule binding;GO:0042803|protein homodimerization activity;GO:0004872|receptor activity;GO:0005102|receptor binding;	K06782	CADM2, IGSF4D, NECL3; cell adhesion molecule 2
chr16	67620029	67620380	352	67620303	22	8.32965	3.80209	4.43308	3_peak_959	chr16	67620231	67620908	UTR5	ENSMUSG00000064115	Cadm2	gi|225543375|ref|NP_848836.2|	2088	0	cell adhesion molecule 2 isoform 1 precursor [Mus musculus]	gi|225543374|ref|NM_178721.4|	9564	0	Mus musculus cell adhesion molecule 2 (Cadm2), transcript variant 1, mRNA	Q8BLQ9	790	0	Cell adhesion molecule 2	.	.	.	.	pfam08205	C2-set_2	CD80-like C2-set immunoglobulin domain. These domains belong to the immunoglobulin superfamily.	GO:0008037|cell recognition;GO:0007157|heterophilic cell-cell adhesion via plasma membrane cell adhesion molecules;GO:0007156|homophilic cell adhesion via plasma membrane adhesion molecules;	GO:0030424|axon;GO:0005913|cell-cell adherens junction;GO:0005887|integral component of plasma membrane;GO:0045202|synapse;	GO:0050839|cell adhesion molecule binding;GO:0042803|protein homodimerization activity;GO:0004872|receptor activity;GO:0005102|receptor binding;	K06782	CADM2, IGSF4D, NECL3; cell adhesion molecule 2
chr16	67620029	67620380	352	67620303	22	8.32965	3.80209	4.43308	3_peak_959	chr16	67620231	67620823	UTR5	ENSMUSG00000064115	Cadm2	gi|225543375|ref|NP_848836.2|	2088	0	cell adhesion molecule 2 isoform 1 precursor [Mus musculus]	gi|225543374|ref|NM_178721.4|	9564	0	Mus musculus cell adhesion molecule 2 (Cadm2), transcript variant 1, mRNA	Q8BLQ9	790	0	Cell adhesion molecule 2	.	.	.	.	pfam08205	C2-set_2	CD80-like C2-set immunoglobulin domain. These domains belong to the immunoglobulin superfamily.	GO:0008037|cell recognition;GO:0007157|heterophilic cell-cell adhesion via plasma membrane cell adhesion molecules;GO:0007156|homophilic cell adhesion via plasma membrane adhesion molecules;	GO:0030424|axon;GO:0005913|cell-cell adherens junction;GO:0005887|integral component of plasma membrane;GO:0045202|synapse;	GO:0050839|cell adhesion molecule binding;GO:0042803|protein homodimerization activity;GO:0004872|receptor activity;GO:0005102|receptor binding;	K06782	CADM2, IGSF4D, NECL3; cell adhesion molecule 2
chr16	67620029	67620380	352	67620303	22	8.32965	3.80209	4.43308	3_peak_959	chr16	66784887	67620170	Intron	ENSMUSG00000064115	Cadm2	gi|225543375|ref|NP_848836.2|	2088	0	cell adhesion molecule 2 isoform 1 precursor [Mus musculus]	gi|225543374|ref|NM_178721.4|	9564	0	Mus musculus cell adhesion molecule 2 (Cadm2), transcript variant 1, mRNA	Q8BLQ9	790	0	Cell adhesion molecule 2	.	.	.	.	pfam08205	C2-set_2	CD80-like C2-set immunoglobulin domain. These domains belong to the immunoglobulin superfamily.	GO:0008037|cell recognition;GO:0007157|heterophilic cell-cell adhesion via plasma membrane cell adhesion molecules;GO:0007156|homophilic cell adhesion via plasma membrane adhesion molecules;	GO:0030424|axon;GO:0005913|cell-cell adherens junction;GO:0005887|integral component of plasma membrane;GO:0045202|synapse;	GO:0050839|cell adhesion molecule binding;GO:0042803|protein homodimerization activity;GO:0004872|receptor activity;GO:0005102|receptor binding;	K06782	CADM2, IGSF4D, NECL3; cell adhesion molecule 2
chr16	67620029	67620380	352	67620303	22	8.32965	3.80209	4.43308	3_peak_959	chr16	66882882	67620170	Intron	ENSMUSG00000064115	Cadm2	gi|225543375|ref|NP_848836.2|	2088	0	cell adhesion molecule 2 isoform 1 precursor [Mus musculus]	gi|225543374|ref|NM_178721.4|	9564	0	Mus musculus cell adhesion molecule 2 (Cadm2), transcript variant 1, mRNA	Q8BLQ9	790	0	Cell adhesion molecule 2	.	.	.	.	pfam08205	C2-set_2	CD80-like C2-set immunoglobulin domain. These domains belong to the immunoglobulin superfamily.	GO:0008037|cell recognition;GO:0007157|heterophilic cell-cell adhesion via plasma membrane cell adhesion molecules;GO:0007156|homophilic cell adhesion via plasma membrane adhesion molecules;	GO:0030424|axon;GO:0005913|cell-cell adherens junction;GO:0005887|integral component of plasma membrane;GO:0045202|synapse;	GO:0050839|cell adhesion molecule binding;GO:0042803|protein homodimerization activity;GO:0004872|receptor activity;GO:0005102|receptor binding;	K06782	CADM2, IGSF4D, NECL3; cell adhesion molecule 2
chr16	67620029	67620380	352	67620303	22	8.32965	3.80209	4.43308	3_peak_959	chr16	66953300	67620170	Intron	ENSMUSG00000064115	Cadm2	gi|225543375|ref|NP_848836.2|	2088	0	cell adhesion molecule 2 isoform 1 precursor [Mus musculus]	gi|225543374|ref|NM_178721.4|	9564	0	Mus musculus cell adhesion molecule 2 (Cadm2), transcript variant 1, mRNA	Q8BLQ9	790	0	Cell adhesion molecule 2	.	.	.	.	pfam08205	C2-set_2	CD80-like C2-set immunoglobulin domain. These domains belong to the immunoglobulin superfamily.	GO:0008037|cell recognition;GO:0007157|heterophilic cell-cell adhesion via plasma membrane cell adhesion molecules;GO:0007156|homophilic cell adhesion via plasma membrane adhesion molecules;	GO:0030424|axon;GO:0005913|cell-cell adherens junction;GO:0005887|integral component of plasma membrane;GO:0045202|synapse;	GO:0050839|cell adhesion molecule binding;GO:0042803|protein homodimerization activity;GO:0004872|receptor activity;GO:0005102|receptor binding;	K06782	CADM2, IGSF4D, NECL3; cell adhesion molecule 2
chr3	88207808	88208291	484	88207963	54	5.76555	1.95533	2.40872	3_peak_1535a	chr3	88207354	88209634	Intron	ENSMUSG00000097156	Gm3764	gi|148683364|gb|EDL15311.1|	591	1e-74	mCG8840, partial [Mus musculus]	gi|644988004|tpe|HG978949.1|	2203	0	TPA: Mus musculus long non-coding RNA OTTMUST00000112770.1 (RP23-168E14.7 gene), lincRNA	.	.	.	.	.	.	.	.	pfam04654	DUF599	Protein of unknown function, DUF599. This family includes several uncharacterized proteins.	.	.	.	.	.
chr3	88207808	88208291	484	88207963	54	5.76555	1.95533	2.40872	3_peak_1535a	chr3	88207471	88209471	Upstream2k	ENSMUSG00000097156	Gm3764	gi|148683364|gb|EDL15311.1|	591	1e-74	mCG8840, partial [Mus musculus]	gi|644988004|tpe|HG978949.1|	2203	0	TPA: Mus musculus long non-coding RNA OTTMUST00000112770.1 (RP23-168E14.7 gene), lincRNA	.	.	.	.	.	.	.	.	pfam04654	DUF599	Protein of unknown function, DUF599. This family includes several uncharacterized proteins.	.	.	.	.	.
chr9	97238124	97238568	445	97238237	12	5.57706	3.68831	2.26894	3_peak_2671	-//-	-//-	-//-	--//--
chr4	33924334	33924666	333	33924444	17	7.03828	3.80381	3.37651	3_peak_1629	chr4	33924592	33925158	Exon	ENSMUSG00000044288	Cnr1	gi|6724315|ref|NP_031752.1|	2480	0	cannabinoid receptor 1 [Mus musculus]	gi|76096369|ref|NM_007726.3|	5807	0	Mus musculus cannabinoid receptor 1 (brain) (Cnr1), mRNA	P47746	959	0	Cannabinoid receptor 1	.	.	.	.	pfam00001	7tm_1	7 transmembrane receptor (rhodopsin family). This family contains, amongst other G-protein-coupled receptors (GCPRs), members of the opsin family, which have been considered to be typical members of the rhodopsin superfamily. They share several motifs, mainly the seven transmembrane helices, GCPRs of the rhodopsin superfamily. All opsins bind a chromophore, such as 11-cis-retinal. The function of…	GO:0007188|adenylate cyclase-modulating G-protein coupled receptor signaling pathway;GO:0007568|aging;GO:0007413|axonal fasciculation;GO:0042593|glucose homeostasis;GO:0060135|maternal process involved in female pregnancy;GO:0007613|memory;GO:0045759|negative regulation of action potential;GO:0045776|negative regulation of blood pressure;GO:0033602|negative regulation of dopamine secretion;GO:003…	GO:0030424|axon;GO:0030426|growth cone;GO:0016021|integral component of membrane;GO:0043231|intracellular membrane-bounded organelle;GO:0045121|membrane raft;GO:0005886|plasma membrane;	GO:0004949|cannabinoid receptor activity;GO:0008144|drug binding;	K04277	CNR1; cannabinoid receptor 1
chr4	33924334	33924666	333	33924444	17	7.03828	3.80381	3.37651	3_peak_1629	chr4	33924631	33925158	Exon	ENSMUSG00000044288	Cnr1	gi|6724315|ref|NP_031752.1|	2480	0	cannabinoid receptor 1 [Mus musculus]	gi|76096369|ref|NM_007726.3|	5807	0	Mus musculus cannabinoid receptor 1 (brain) (Cnr1), mRNA	P47746	959	0	Cannabinoid receptor 1	.	.	.	.	pfam00001	7tm_1	7 transmembrane receptor (rhodopsin family). This family contains, amongst other G-protein-coupled receptors (GCPRs), members of the opsin family, which have been considered to be typical members of the rhodopsin superfamily. They share several motifs, mainly the seven transmembrane helices, GCPRs of the rhodopsin superfamily. All opsins bind a chromophore, such as 11-cis-retinal. The function of…	GO:0007188|adenylate cyclase-modulating G-protein coupled receptor signaling pathway;GO:0007568|aging;GO:0007413|axonal fasciculation;GO:0042593|glucose homeostasis;GO:0060135|maternal process involved in female pregnancy;GO:0007613|memory;GO:0045759|negative regulation of action potential;GO:0045776|negative regulation of blood pressure;GO:0033602|negative regulation of dopamine secretion;GO:003…	GO:0030424|axon;GO:0030426|growth cone;GO:0016021|integral component of membrane;GO:0043231|intracellular membrane-bounded organelle;GO:0045121|membrane raft;GO:0005886|plasma membrane;	GO:0004949|cannabinoid receptor activity;GO:0008144|drug binding;	K04277	CNR1; cannabinoid receptor 1
chr4	33924334	33924666	333	33924444	17	7.03828	3.80381	3.37651	3_peak_1629	chr4	33922592	33924592	Upstream2k	ENSMUSG00000044288	Cnr1	gi|6724315|ref|NP_031752.1|	2480	0	cannabinoid receptor 1 [Mus musculus]	gi|76096369|ref|NM_007726.3|	5807	0	Mus musculus cannabinoid receptor 1 (brain) (Cnr1), mRNA	P47746	959	0	Cannabinoid receptor 1	.	.	.	.	pfam00001	7tm_1	7 transmembrane receptor (rhodopsin family). This family contains, amongst other G-protein-coupled receptors (GCPRs), members of the opsin family, which have been considered to be typical members of the rhodopsin superfamily. They share several motifs, mainly the seven transmembrane helices, GCPRs of the rhodopsin superfamily. All opsins bind a chromophore, such as 11-cis-retinal. The function of…	GO:0007188|adenylate cyclase-modulating G-protein coupled receptor signaling pathway;GO:0007568|aging;GO:0007413|axonal fasciculation;GO:0042593|glucose homeostasis;GO:0060135|maternal process involved in female pregnancy;GO:0007613|memory;GO:0045759|negative regulation of action potential;GO:0045776|negative regulation of blood pressure;GO:0033602|negative regulation of dopamine secretion;GO:003…	GO:0030424|axon;GO:0030426|growth cone;GO:0016021|integral component of membrane;GO:0043231|intracellular membrane-bounded organelle;GO:0045121|membrane raft;GO:0005886|plasma membrane;	GO:0004949|cannabinoid receptor activity;GO:0008144|drug binding;	K04277	CNR1; cannabinoid receptor 1
chr4	33924334	33924666	333	33924444	17	7.03828	3.80381	3.37651	3_peak_1629	chr4	33922631	33924631	Upstream2k	ENSMUSG00000044288	Cnr1	gi|6724315|ref|NP_031752.1|	2480	0	cannabinoid receptor 1 [Mus musculus]	gi|76096369|ref|NM_007726.3|	5807	0	Mus musculus cannabinoid receptor 1 (brain) (Cnr1), mRNA	P47746	959	0	Cannabinoid receptor 1	.	.	.	.	pfam00001	7tm_1	7 transmembrane receptor (rhodopsin family). This family contains, amongst other G-protein-coupled receptors (GCPRs), members of the opsin family, which have been considered to be typical members of the rhodopsin superfamily. They share several motifs, mainly the seven transmembrane helices, GCPRs of the rhodopsin superfamily. All opsins bind a chromophore, such as 11-cis-retinal. The function of…	GO:0007188|adenylate cyclase-modulating G-protein coupled receptor signaling pathway;GO:0007568|aging;GO:0007413|axonal fasciculation;GO:0042593|glucose homeostasis;GO:0060135|maternal process involved in female pregnancy;GO:0007613|memory;GO:0045759|negative regulation of action potential;GO:0045776|negative regulation of blood pressure;GO:0033602|negative regulation of dopamine secretion;GO:003…	GO:0030424|axon;GO:0030426|growth cone;GO:0016021|integral component of membrane;GO:0043231|intracellular membrane-bounded organelle;GO:0045121|membrane raft;GO:0005886|plasma membrane;	GO:0004949|cannabinoid receptor activity;GO:0008144|drug binding;	K04277	CNR1; cannabinoid receptor 1
chr4	33924334	33924666	333	33924444	17	7.03828	3.80381	3.37651	3_peak_1629	chr4	33924201	33926201	Upstream2k	ENSMUSG00000044288	Cnr1	gi|6724315|ref|NP_031752.1|	2480	0	cannabinoid receptor 1 [Mus musculus]	gi|76096369|ref|NM_007726.3|	5807	0	Mus musculus cannabinoid receptor 1 (brain) (Cnr1), mRNA	P47746	959	0	Cannabinoid receptor 1	.	.	.	.	pfam00001	7tm_1	7 transmembrane receptor (rhodopsin family). This family contains, amongst other G-protein-coupled receptors (GCPRs), members of the opsin family, which have been considered to be typical members of the rhodopsin superfamily. They share several motifs, mainly the seven transmembrane helices, GCPRs of the rhodopsin superfamily. All opsins bind a chromophore, such as 11-cis-retinal. The function of…	GO:0007188|adenylate cyclase-modulating G-protein coupled receptor signaling pathway;GO:0007568|aging;GO:0007413|axonal fasciculation;GO:0042593|glucose homeostasis;GO:0060135|maternal process involved in female pregnancy;GO:0007613|memory;GO:0045759|negative regulation of action potential;GO:0045776|negative regulation of blood pressure;GO:0033602|negative regulation of dopamine secretion;GO:003…	GO:0030424|axon;GO:0030426|growth cone;GO:0016021|integral component of membrane;GO:0043231|intracellular membrane-bounded organelle;GO:0045121|membrane raft;GO:0005886|plasma membrane;	GO:0004949|cannabinoid receptor activity;GO:0008144|drug binding;	K04277	CNR1; cannabinoid receptor 1
chr4	33924334	33924666	333	33924444	17	7.03828	3.80381	3.37651	3_peak_1629	chr4	33924631	33925158	UTR5	ENSMUSG00000044288	Cnr1	gi|6724315|ref|NP_031752.1|	2480	0	cannabinoid receptor 1 [Mus musculus]	gi|76096369|ref|NM_007726.3|	5807	0	Mus musculus cannabinoid receptor 1 (brain) (Cnr1), mRNA	P47746	959	0	Cannabinoid receptor 1	.	.	.	.	pfam00001	7tm_1	7 transmembrane receptor (rhodopsin family). This family contains, amongst other G-protein-coupled receptors (GCPRs), members of the opsin family, which have been considered to be typical members of the rhodopsin superfamily. They share several motifs, mainly the seven transmembrane helices, GCPRs of the rhodopsin superfamily. All opsins bind a chromophore, such as 11-cis-retinal. The function of…	GO:0007188|adenylate cyclase-modulating G-protein coupled receptor signaling pathway;GO:0007568|aging;GO:0007413|axonal fasciculation;GO:0042593|glucose homeostasis;GO:0060135|maternal process involved in female pregnancy;GO:0007613|memory;GO:0045759|negative regulation of action potential;GO:0045776|negative regulation of blood pressure;GO:0033602|negative regulation of dopamine secretion;GO:003…	GO:0030424|axon;GO:0030426|growth cone;GO:0016021|integral component of membrane;GO:0043231|intracellular membrane-bounded organelle;GO:0045121|membrane raft;GO:0005886|plasma membrane;	GO:0004949|cannabinoid receptor activity;GO:0008144|drug binding;	K04277	CNR1; cannabinoid receptor 1
chr7	113765956	113766834	879	113766386	28	11.5097	4.36406	7.1929	3_peak_2311	chr7	113765997	113766566	Exon	ENSMUSG00000038156	Spon1	gi|21704174|ref|NP_663559.1|	3971	0	spondin-1 precursor [Mus musculus]	gi|254911077|ref|NM_145584.2|	6161	0	Mus musculus spondin 1, (f-spondin) extracellular matrix protein (Spon1), mRNA	Q8VCC9	537	6e-168	Spondin-1	.	.	.	.	pfam06468	Spond_N	Spondin_N. This conserved region is found at the in the N-terminal half of several Spondin proteins. Spondins are involved in patterning axonal growth trajectory through either inhibiting or promoting adhesion of embryonic nerve cells.	GO:0007155|cell adhesion;	GO:0005615|extracellular space;GO:0005578|proteinaceous extracellular matrix;	GO:0046872|metal ion binding;	.	.
chr7	113765956	113766834	879	113766386	28	11.5097	4.36406	7.1929	3_peak_2311	chr7	113766173	113766566	Exon	ENSMUSG00000038156	Spon1	gi|21704174|ref|NP_663559.1|	3971	0	spondin-1 precursor [Mus musculus]	gi|254911077|ref|NM_145584.2|	6161	0	Mus musculus spondin 1, (f-spondin) extracellular matrix protein (Spon1), mRNA	Q8VCC9	537	6e-168	Spondin-1	.	.	.	.	pfam06468	Spond_N	Spondin_N. This conserved region is found at the in the N-terminal half of several Spondin proteins. Spondins are involved in patterning axonal growth trajectory through either inhibiting or promoting adhesion of embryonic nerve cells.	GO:0007155|cell adhesion;	GO:0005615|extracellular space;GO:0005578|proteinaceous extracellular matrix;	GO:0046872|metal ion binding;	.	.
chr7	113765956	113766834	879	113766386	28	11.5097	4.36406	7.1929	3_peak_2311	chr7	113763997	113765997	Upstream2k	ENSMUSG00000038156	Spon1	gi|21704174|ref|NP_663559.1|	3971	0	spondin-1 precursor [Mus musculus]	gi|254911077|ref|NM_145584.2|	6161	0	Mus musculus spondin 1, (f-spondin) extracellular matrix protein (Spon1), mRNA	Q8VCC9	537	6e-168	Spondin-1	.	.	.	.	pfam06468	Spond_N	Spondin_N. This conserved region is found at the in the N-terminal half of several Spondin proteins. Spondins are involved in patterning axonal growth trajectory through either inhibiting or promoting adhesion of embryonic nerve cells.	GO:0007155|cell adhesion;	GO:0005615|extracellular space;GO:0005578|proteinaceous extracellular matrix;	GO:0046872|metal ion binding;	.	.
chr7	113765956	113766834	879	113766386	28	11.5097	4.36406	7.1929	3_peak_2311	chr7	113764173	113766173	Upstream2k	ENSMUSG00000038156	Spon1	gi|21704174|ref|NP_663559.1|	3971	0	spondin-1 precursor [Mus musculus]	gi|254911077|ref|NM_145584.2|	6161	0	Mus musculus spondin 1, (f-spondin) extracellular matrix protein (Spon1), mRNA	Q8VCC9	537	6e-168	Spondin-1	.	.	.	.	pfam06468	Spond_N	Spondin_N. This conserved region is found at the in the N-terminal half of several Spondin proteins. Spondins are involved in patterning axonal growth trajectory through either inhibiting or promoting adhesion of embryonic nerve cells.	GO:0007155|cell adhesion;	GO:0005615|extracellular space;GO:0005578|proteinaceous extracellular matrix;	GO:0046872|metal ion binding;	.	.
chr7	113765956	113766834	879	113766386	28	11.5097	4.36406	7.1929	3_peak_2311	chr7	113765997	113766328	UTR5	ENSMUSG00000038156	Spon1	gi|21704174|ref|NP_663559.1|	3971	0	spondin-1 precursor [Mus musculus]	gi|254911077|ref|NM_145584.2|	6161	0	Mus musculus spondin 1, (f-spondin) extracellular matrix protein (Spon1), mRNA	Q8VCC9	537	6e-168	Spondin-1	.	.	.	.	pfam06468	Spond_N	Spondin_N. This conserved region is found at the in the N-terminal half of several Spondin proteins. Spondins are involved in patterning axonal growth trajectory through either inhibiting or promoting adhesion of embryonic nerve cells.	GO:0007155|cell adhesion;	GO:0005615|extracellular space;GO:0005578|proteinaceous extracellular matrix;	GO:0046872|metal ion binding;	.	.
chr7	113765956	113766834	879	113766386	28	11.5097	4.36406	7.1929	3_peak_2311	chr7	113766173	113766328	UTR5	ENSMUSG00000038156	Spon1	gi|21704174|ref|NP_663559.1|	3971	0	spondin-1 precursor [Mus musculus]	gi|254911077|ref|NM_145584.2|	6161	0	Mus musculus spondin 1, (f-spondin) extracellular matrix protein (Spon1), mRNA	Q8VCC9	537	6e-168	Spondin-1	.	.	.	.	pfam06468	Spond_N	Spondin_N. This conserved region is found at the in the N-terminal half of several Spondin proteins. Spondins are involved in patterning axonal growth trajectory through either inhibiting or promoting adhesion of embryonic nerve cells.	GO:0007155|cell adhesion;	GO:0005615|extracellular space;GO:0005578|proteinaceous extracellular matrix;	GO:0046872|metal ion binding;	.	.
chr7	113765956	113766834	879	113766386	28	11.5097	4.36406	7.1929	3_peak_2311	chr7	113766566	113788445	Intron	ENSMUSG00000038156	Spon1	gi|21704174|ref|NP_663559.1|	3971	0	spondin-1 precursor [Mus musculus]	gi|254911077|ref|NM_145584.2|	6161	0	Mus musculus spondin 1, (f-spondin) extracellular matrix protein (Spon1), mRNA	Q8VCC9	537	6e-168	Spondin-1	.	.	.	.	pfam06468	Spond_N	Spondin_N. This conserved region is found at the in the N-terminal half of several Spondin proteins. Spondins are involved in patterning axonal growth trajectory through either inhibiting or promoting adhesion of embryonic nerve cells.	GO:0007155|cell adhesion;	GO:0005615|extracellular space;GO:0005578|proteinaceous extracellular matrix;	GO:0046872|metal ion binding;	.	.
chr4	131303643	131304076	434	131303831	19	8.51396	4.24051	4.58914	3_peak_1750	-//-	-//-	-//-	--//--
chr7	45186078	45186641	564	45186186	46	6.51974	2.20261	2.97364	3_peak_2208	chr7	45185329	45186651	Intron	ENSMUSG00000038292	Ccdc155	gi|237512934|ref|NP_958762.2|	2664	0	protein KASH5 [Mus musculus]	gi|237512933|ref|NM_201374.2|	2210	0	Mus musculus coiled-coil domain containing 155 (Ccdc155), mRNA	Q80VJ8	1030	0	Protein KASH5	.	.	.	.	pfam14662	CCDC155	Coiled-coil region of CCDC155. This is a small family of eukaryotic proteins of unknown function.ThiS is the central coiled-coil region.	GO:0007015|actin filament organization;GO:0090220|chromosome localization to nuclear envelope involved in homologous chromosome segregation;GO:0000724|double-strand break repair via homologous recombination;GO:0048477|oogenesis;GO:0007283|spermatogenesis;GO:0051225|spindle assembly;GO:0051653|spindle localization;GO:0007129|synapsis;GO:0034397|telomere localization;	GO:0000781|chromosome, telomeric region;GO:0016021|integral component of membrane;GO:0000800|lateral element;GO:0034993|LINC complex;GO:0090619|meiotic spindle pole;GO:0005640|nuclear outer membrane;	GO:0070840|dynein complex binding;GO:0042802|identical protein binding;	.	.
chr7	45186078	45186641	564	45186186	46	6.51974	2.20261	2.97364	3_peak_2208	chr7	45184253	45189340	Intron	ENSMUSG00000038292	Ccdc155	gi|237512934|ref|NP_958762.2|	2664	0	protein KASH5 [Mus musculus]	gi|237512933|ref|NM_201374.2|	2210	0	Mus musculus coiled-coil domain containing 155 (Ccdc155), mRNA	Q80VJ8	1030	0	Protein KASH5	.	.	.	.	pfam14662	CCDC155	Coiled-coil region of CCDC155. This is a small family of eukaryotic proteins of unknown function.ThiS is the central coiled-coil region.	GO:0007015|actin filament organization;GO:0090220|chromosome localization to nuclear envelope involved in homologous chromosome segregation;GO:0000724|double-strand break repair via homologous recombination;GO:0048477|oogenesis;GO:0007283|spermatogenesis;GO:0051225|spindle assembly;GO:0051653|spindle localization;GO:0007129|synapsis;GO:0034397|telomere localization;	GO:0000781|chromosome, telomeric region;GO:0016021|integral component of membrane;GO:0000800|lateral element;GO:0034993|LINC complex;GO:0090619|meiotic spindle pole;GO:0005640|nuclear outer membrane;	GO:0070840|dynein complex binding;GO:0042802|identical protein binding;	.	.
chr9	105960588	105960994	407	105960960	15	6.88576	3.98926	3.25458	3_peak_2684	chr9	105960545	105960643	Exon	ENSMUSG00000091345	Col6a5	gi|816380041|sp|A6H584.4|CO6A5_MOUSE	7836	0	RecName: Full=Collagen alpha-5(VI) chain; AltName: Full=Collagen alpha-1(XXIX) chain; Flags: Precursor	gi|269315862|ref|NM_001167923.1|	9289	0	Mus musculus collagen, type VI, alpha 5 (Col6a5), mRNA	A6H584	3021	0	Collagen alpha-5(VI) chain	.	.	.	.	pfam00092	VWA	von Willebrand factor type A domain.	GO:0007155|cell adhesion;	GO:0005581|collagen trimer;GO:0005576|extracellular region;GO:0005578|proteinaceous extracellular matrix;	.	K06238	COL6A; collagen, type VI, alpha
chr9	105960588	105960994	407	105960960	15	6.88576	3.98926	3.25458	3_peak_2684	chr9	105960643	105962643	Upstream2k	ENSMUSG00000091345	Col6a5	gi|816380041|sp|A6H584.4|CO6A5_MOUSE	7836	0	RecName: Full=Collagen alpha-5(VI) chain; AltName: Full=Collagen alpha-1(XXIX) chain; Flags: Precursor	gi|269315862|ref|NM_001167923.1|	9289	0	Mus musculus collagen, type VI, alpha 5 (Col6a5), mRNA	A6H584	3021	0	Collagen alpha-5(VI) chain	.	.	.	.	pfam00092	VWA	von Willebrand factor type A domain.	GO:0007155|cell adhesion;	GO:0005581|collagen trimer;GO:0005576|extracellular region;GO:0005578|proteinaceous extracellular matrix;	.	K06238	COL6A; collagen, type VI, alpha
chr9	105960588	105960994	407	105960960	15	6.88576	3.98926	3.25458	3_peak_2684	chr9	105960643	105962643	Upstream2k	ENSMUSG00000091345	Col6a5	gi|816380041|sp|A6H584.4|CO6A5_MOUSE	7836	0	RecName: Full=Collagen alpha-5(VI) chain; AltName: Full=Collagen alpha-1(XXIX) chain; Flags: Precursor	gi|269315862|ref|NM_001167923.1|	9289	0	Mus musculus collagen, type VI, alpha 5 (Col6a5), mRNA	A6H584	3021	0	Collagen alpha-5(VI) chain	.	.	.	.	pfam00092	VWA	von Willebrand factor type A domain.	GO:0007155|cell adhesion;	GO:0005581|collagen trimer;GO:0005576|extracellular region;GO:0005578|proteinaceous extracellular matrix;	.	K06238	COL6A; collagen, type VI, alpha
chr9	105960588	105960994	407	105960960	15	6.88576	3.98926	3.25458	3_peak_2684	chr9	105960545	105960643	UTR5	ENSMUSG00000091345	Col6a5	gi|816380041|sp|A6H584.4|CO6A5_MOUSE	7836	0	RecName: Full=Collagen alpha-5(VI) chain; AltName: Full=Collagen alpha-1(XXIX) chain; Flags: Precursor	gi|269315862|ref|NM_001167923.1|	9289	0	Mus musculus collagen, type VI, alpha 5 (Col6a5), mRNA	A6H584	3021	0	Collagen alpha-5(VI) chain	.	.	.	.	pfam00092	VWA	von Willebrand factor type A domain.	GO:0007155|cell adhesion;	GO:0005581|collagen trimer;GO:0005576|extracellular region;GO:0005578|proteinaceous extracellular matrix;	.	K06238	COL6A; collagen, type VI, alpha
chr12	112880888	112881292	405	112881198	24	7.61723	3.35094	3.84507	3_peak_559	-//-	-//-	-//-	--//--
chr6	30732863	30733330	468	30732975	20	5.72725	2.95777	2.37996	3_peak_2052	chr6	30732714	30734714	Downstream2k	ENSMUSG00000051855	Mest	gi|356582503|ref|NP_001239221.1|	1797	0	mesoderm-specific transcript protein isoform 1 [Mus musculus]	gi|356582502|ref|NM_001252292.1|	2665	0	Mus musculus mesoderm specific transcript (Mest), transcript variant 1, mRNA	Q07646	664	0	Mesoderm-specific transcript protein	.	.	.	.	pfam12697	Abhydrolase_6	Alpha/beta hydrolase family. This family contains alpha/beta hydrolase enzymes of diverse specificity.	GO:0007498|mesoderm development;GO:0010883|regulation of lipid storage;	GO:0005783|endoplasmic reticulum;GO:0005789|endoplasmic reticulum membrane;GO:0016021|integral component of membrane;	GO:0016787|hydrolase activity;	.	.
chr6	30732863	30733330	468	30732975	20	5.72725	2.95777	2.37996	3_peak_2052	chr6	30733028	30735028	Downstream2k	ENSMUSG00000107825	Gm44296	.	.	.	.	gi|41016171|gb|AC146699.5|	596	0	Mus musculus chromosome 6, clone RP24-211G11, complete sequence	.	.	.	.	.	.	.	.	pfam15268	Dapper	Dapper. This is a family of signalling proteins. They act in a diverse range of signaling pathways and have a range of binding partners. They act as homo- and heterodimers.	.	.	.	.	.
chr6	30732863	30733330	468	30732975	20	5.72725	2.95777	2.37996	3_peak_2052	chr6	30731453	30733453	Upstream2k	ENSMUSG00000051855	Mest	gi|356582503|ref|NP_001239221.1|	1797	0	mesoderm-specific transcript protein isoform 1 [Mus musculus]	gi|356582502|ref|NM_001252292.1|	2665	0	Mus musculus mesoderm specific transcript (Mest), transcript variant 1, mRNA	Q07646	664	0	Mesoderm-specific transcript protein	.	.	.	.	pfam12697	Abhydrolase_6	Alpha/beta hydrolase family. This family contains alpha/beta hydrolase enzymes of diverse specificity.	GO:0007498|mesoderm development;GO:0010883|regulation of lipid storage;	GO:0005783|endoplasmic reticulum;GO:0005789|endoplasmic reticulum membrane;GO:0016021|integral component of membrane;	GO:0016787|hydrolase activity;	.	.
chr6	30732863	30733330	468	30732975	20	5.72725	2.95777	2.37996	3_peak_2052	chr6	30731505	30733505	Upstream2k	ENSMUSG00000051855	Mest	gi|356582503|ref|NP_001239221.1|	1797	0	mesoderm-specific transcript protein isoform 1 [Mus musculus]	gi|356582502|ref|NM_001252292.1|	2665	0	Mus musculus mesoderm specific transcript (Mest), transcript variant 1, mRNA	Q07646	664	0	Mesoderm-specific transcript protein	.	.	.	.	pfam12697	Abhydrolase_6	Alpha/beta hydrolase family. This family contains alpha/beta hydrolase enzymes of diverse specificity.	GO:0007498|mesoderm development;GO:0010883|regulation of lipid storage;	GO:0005783|endoplasmic reticulum;GO:0005789|endoplasmic reticulum membrane;GO:0016021|integral component of membrane;	GO:0016787|hydrolase activity;	.	.
chr6	30732863	30733330	468	30732975	20	5.72725	2.95777	2.37996	3_peak_2052	chr6	30732417	30734417	Upstream2k	ENSMUSG00000098260	Gm27522	.	.	.	.	gi|41016171|gb|AC146699.5|	230	8e-116	Mus musculus chromosome 6, clone RP24-211G11, complete sequence	.	.	.	.	.	.	.	.	pfam07793	DUF1631	Protein of unknown function (DUF1631). The members of this family are sequences derived from a group of hypothetical proteins expressed by certain bacterial species. The region concerned is approximately 440 amino acid residues in length.	.	.	.	.	.
chr6	30732863	30733330	468	30732975	20	5.72725	2.95777	2.37996	3_peak_2052	chr6	30723646	30740669	Intron	ENSMUSG00000051855	Mest	gi|356582503|ref|NP_001239221.1|	1797	0	mesoderm-specific transcript protein isoform 1 [Mus musculus]	gi|356582502|ref|NM_001252292.1|	2665	0	Mus musculus mesoderm specific transcript (Mest), transcript variant 1, mRNA	Q07646	664	0	Mesoderm-specific transcript protein	.	.	.	.	pfam12697	Abhydrolase_6	Alpha/beta hydrolase family. This family contains alpha/beta hydrolase enzymes of diverse specificity.	GO:0007498|mesoderm development;GO:0010883|regulation of lipid storage;	GO:0005783|endoplasmic reticulum;GO:0005789|endoplasmic reticulum membrane;GO:0016021|integral component of membrane;	GO:0016787|hydrolase activity;	.	.
chr6	30732863	30733330	468	30732975	20	5.72725	2.95777	2.37996	3_peak_2052	chr6	30732749	30740669	Intron	ENSMUSG00000051855	Mest	gi|356582503|ref|NP_001239221.1|	1797	0	mesoderm-specific transcript protein isoform 1 [Mus musculus]	gi|356582502|ref|NM_001252292.1|	2665	0	Mus musculus mesoderm specific transcript (Mest), transcript variant 1, mRNA	Q07646	664	0	Mesoderm-specific transcript protein	.	.	.	.	pfam12697	Abhydrolase_6	Alpha/beta hydrolase family. This family contains alpha/beta hydrolase enzymes of diverse specificity.	GO:0007498|mesoderm development;GO:0010883|regulation of lipid storage;	GO:0005783|endoplasmic reticulum;GO:0005789|endoplasmic reticulum membrane;GO:0016021|integral component of membrane;	GO:0016787|hydrolase activity;	.	.
chr4	21678382	21679811	1430	21679054	55	14.9407	3.42143	10.3068	3_peak_1618	chr4	21677664	21679664	Downstream2k	ENSMUSG00000040478	Prdm13	gi|124107612|ref|NP_001074240.1|	2813	0	PR domain zinc finger protein 13 [Mus musculus]	gi|17160940|gb|BC017632.1|	3245	0	Mus musculus PR domain containing 13, mRNA (cDNA clone IMAGE:4507465), containing frame-shift errors	E9PZZ1	376	3e-119	PR domain zinc finger protein 13	.	.	.	.	pfam00856	SET	SET domain. SET domains are protein lysine methyltransferase enzymes. SET domains appear to be protein-protein interaction domains. It has been demonstrated that SET domains mediate interactions with a family of proteins that display similarity with dual-specificity phosphatases (dsPTPases). A subset of SET domains have been called PR domains. These domains are divergent in sequence from other SE…	GO:0000122|negative regulation of transcription from RNA polymerase II promoter;GO:0022008|neurogenesis;GO:0006351|transcription, DNA-templated;	GO:0005634|nucleus;	GO:0003682|chromatin binding;GO:0003677|DNA binding;GO:0042054|histone methyltransferase activity;GO:0046872|metal ion binding;	.	.
chr4	21678382	21679811	1430	21679054	55	14.9407	3.42143	10.3068	3_peak_1618	chr4	21677746	21679746	Downstream2k	ENSMUSG00000040478	Prdm13	gi|124107612|ref|NP_001074240.1|	2813	0	PR domain zinc finger protein 13 [Mus musculus]	gi|17160940|gb|BC017632.1|	3245	0	Mus musculus PR domain containing 13, mRNA (cDNA clone IMAGE:4507465), containing frame-shift errors	E9PZZ1	376	3e-119	PR domain zinc finger protein 13	.	.	.	.	pfam00856	SET	SET domain. SET domains are protein lysine methyltransferase enzymes. SET domains appear to be protein-protein interaction domains. It has been demonstrated that SET domains mediate interactions with a family of proteins that display similarity with dual-specificity phosphatases (dsPTPases). A subset of SET domains have been called PR domains. These domains are divergent in sequence from other SE…	GO:0000122|negative regulation of transcription from RNA polymerase II promoter;GO:0022008|neurogenesis;GO:0006351|transcription, DNA-templated;	GO:0005634|nucleus;	GO:0003682|chromatin binding;GO:0003677|DNA binding;GO:0042054|histone methyltransferase activity;GO:0046872|metal ion binding;	.	.
chr4	21678382	21679811	1430	21679054	55	14.9407	3.42143	10.3068	3_peak_1618	chr4	21677479	21679947	Exon	ENSMUSG00000040478	Prdm13	gi|124107612|ref|NP_001074240.1|	2813	0	PR domain zinc finger protein 13 [Mus musculus]	gi|17160940|gb|BC017632.1|	3245	0	Mus musculus PR domain containing 13, mRNA (cDNA clone IMAGE:4507465), containing frame-shift errors	E9PZZ1	376	3e-119	PR domain zinc finger protein 13	.	.	.	.	pfam00856	SET	SET domain. SET domains are protein lysine methyltransferase enzymes. SET domains appear to be protein-protein interaction domains. It has been demonstrated that SET domains mediate interactions with a family of proteins that display similarity with dual-specificity phosphatases (dsPTPases). A subset of SET domains have been called PR domains. These domains are divergent in sequence from other SE…	GO:0000122|negative regulation of transcription from RNA polymerase II promoter;GO:0022008|neurogenesis;GO:0006351|transcription, DNA-templated;	GO:0005634|nucleus;	GO:0003682|chromatin binding;GO:0003677|DNA binding;GO:0042054|histone methyltransferase activity;GO:0046872|metal ion binding;	.	.
chr4	21678382	21679811	1430	21679054	55	14.9407	3.42143	10.3068	3_peak_1618	chr4	21677480	21679947	Exon	ENSMUSG00000040478	Prdm13	gi|124107612|ref|NP_001074240.1|	2813	0	PR domain zinc finger protein 13 [Mus musculus]	gi|17160940|gb|BC017632.1|	3245	0	Mus musculus PR domain containing 13, mRNA (cDNA clone IMAGE:4507465), containing frame-shift errors	E9PZZ1	376	3e-119	PR domain zinc finger protein 13	.	.	.	.	pfam00856	SET	SET domain. SET domains are protein lysine methyltransferase enzymes. SET domains appear to be protein-protein interaction domains. It has been demonstrated that SET domains mediate interactions with a family of proteins that display similarity with dual-specificity phosphatases (dsPTPases). A subset of SET domains have been called PR domains. These domains are divergent in sequence from other SE…	GO:0000122|negative regulation of transcription from RNA polymerase II promoter;GO:0022008|neurogenesis;GO:0006351|transcription, DNA-templated;	GO:0005634|nucleus;	GO:0003682|chromatin binding;GO:0003677|DNA binding;GO:0042054|histone methyltransferase activity;GO:0046872|metal ion binding;	.	.
chr4	21678382	21679811	1430	21679054	55	14.9407	3.42143	10.3068	3_peak_1618	chr4	21679664	21679947	Exon	ENSMUSG00000040478	Prdm13	gi|124107612|ref|NP_001074240.1|	2813	0	PR domain zinc finger protein 13 [Mus musculus]	gi|17160940|gb|BC017632.1|	3245	0	Mus musculus PR domain containing 13, mRNA (cDNA clone IMAGE:4507465), containing frame-shift errors	E9PZZ1	376	3e-119	PR domain zinc finger protein 13	.	.	.	.	pfam00856	SET	SET domain. SET domains are protein lysine methyltransferase enzymes. SET domains appear to be protein-protein interaction domains. It has been demonstrated that SET domains mediate interactions with a family of proteins that display similarity with dual-specificity phosphatases (dsPTPases). A subset of SET domains have been called PR domains. These domains are divergent in sequence from other SE…	GO:0000122|negative regulation of transcription from RNA polymerase II promoter;GO:0022008|neurogenesis;GO:0006351|transcription, DNA-templated;	GO:0005634|nucleus;	GO:0003682|chromatin binding;GO:0003677|DNA binding;GO:0042054|histone methyltransferase activity;GO:0046872|metal ion binding;	.	.
chr4	21678382	21679811	1430	21679054	55	14.9407	3.42143	10.3068	3_peak_1618	chr4	21679746	21679947	Exon	ENSMUSG00000040478	Prdm13	gi|124107612|ref|NP_001074240.1|	2813	0	PR domain zinc finger protein 13 [Mus musculus]	gi|17160940|gb|BC017632.1|	3245	0	Mus musculus PR domain containing 13, mRNA (cDNA clone IMAGE:4507465), containing frame-shift errors	E9PZZ1	376	3e-119	PR domain zinc finger protein 13	.	.	.	.	pfam00856	SET	SET domain. SET domains are protein lysine methyltransferase enzymes. SET domains appear to be protein-protein interaction domains. It has been demonstrated that SET domains mediate interactions with a family of proteins that display similarity with dual-specificity phosphatases (dsPTPases). A subset of SET domains have been called PR domains. These domains are divergent in sequence from other SE…	GO:0000122|negative regulation of transcription from RNA polymerase II promoter;GO:0022008|neurogenesis;GO:0006351|transcription, DNA-templated;	GO:0005634|nucleus;	GO:0003682|chromatin binding;GO:0003677|DNA binding;GO:0042054|histone methyltransferase activity;GO:0046872|metal ion binding;	.	.
chr16	94997558	94998027	470	94997680	21	6.02595	2.99926	2.59017	3_peak_978	chr16	94997186	94997696	Exon	ENSMUSG00000043301	Kcnj6	gi|635023465|ref|XP_007966108.1|	2208	0	PREDICTED: G protein-activated inward rectifier potassium channel 2 isoform X1 [Chlorocebus sabaeus]	gi|71051592|ref|NM_001025590.1|	3637	0	Mus musculus potassium inwardly-rectifying channel, subfamily J, member 6 (Kcnj6), transcript variant Girk2C, mRNA	P48051	644	0	G protein-activated inward rectifier potassium channel 2	.	.	.	.	pfam01007	IRK	Inward rectifier potassium channel.	GO:0010107|potassium ion import;GO:0006813|potassium ion transport;	GO:0005794|Golgi apparatus;GO:0005886|plasma membrane;GO:0008076|voltage-gated potassium channel complex;	GO:0015467|G-protein activated inward rectifier potassium channel activity;GO:0005242|inward rectifier potassium channel activity;	K05000	KCNJ6; potassium inwardly-rectifying channel subfamily J member 6
chr16	94997558	94998027	470	94997680	21	6.02595	2.99926	2.59017	3_peak_978	chr16	94997696	94999696	Upstream2k	ENSMUSG00000043301	Kcnj6	gi|635023465|ref|XP_007966108.1|	2208	0	PREDICTED: G protein-activated inward rectifier potassium channel 2 isoform X1 [Chlorocebus sabaeus]	gi|71051592|ref|NM_001025590.1|	3637	0	Mus musculus potassium inwardly-rectifying channel, subfamily J, member 6 (Kcnj6), transcript variant Girk2C, mRNA	P48051	644	0	G protein-activated inward rectifier potassium channel 2	.	.	.	.	pfam01007	IRK	Inward rectifier potassium channel.	GO:0010107|potassium ion import;GO:0006813|potassium ion transport;	GO:0005794|Golgi apparatus;GO:0005886|plasma membrane;GO:0008076|voltage-gated potassium channel complex;	GO:0015467|G-protein activated inward rectifier potassium channel activity;GO:0005242|inward rectifier potassium channel activity;	K05000	KCNJ6; potassium inwardly-rectifying channel subfamily J member 6
chr16	94997558	94998027	470	94997680	21	6.02595	2.99926	2.59017	3_peak_978	chr16	94997696	94999696	Upstream2k	ENSMUSG00000043301	Kcnj6	gi|635023465|ref|XP_007966108.1|	2208	0	PREDICTED: G protein-activated inward rectifier potassium channel 2 isoform X1 [Chlorocebus sabaeus]	gi|71051592|ref|NM_001025590.1|	3637	0	Mus musculus potassium inwardly-rectifying channel, subfamily J, member 6 (Kcnj6), transcript variant Girk2C, mRNA	P48051	644	0	G protein-activated inward rectifier potassium channel 2	.	.	.	.	pfam01007	IRK	Inward rectifier potassium channel.	GO:0010107|potassium ion import;GO:0006813|potassium ion transport;	GO:0005794|Golgi apparatus;GO:0005886|plasma membrane;GO:0008076|voltage-gated potassium channel complex;	GO:0015467|G-protein activated inward rectifier potassium channel activity;GO:0005242|inward rectifier potassium channel activity;	K05000	KCNJ6; potassium inwardly-rectifying channel subfamily J member 6
chr16	94997558	94998027	470	94997680	21	6.02595	2.99926	2.59017	3_peak_978	chr16	94997186	94997696	UTR5	ENSMUSG00000043301	Kcnj6	gi|635023465|ref|XP_007966108.1|	2208	0	PREDICTED: G protein-activated inward rectifier potassium channel 2 isoform X1 [Chlorocebus sabaeus]	gi|71051592|ref|NM_001025590.1|	3637	0	Mus musculus potassium inwardly-rectifying channel, subfamily J, member 6 (Kcnj6), transcript variant Girk2C, mRNA	P48051	644	0	G protein-activated inward rectifier potassium channel 2	.	.	.	.	pfam01007	IRK	Inward rectifier potassium channel.	GO:0010107|potassium ion import;GO:0006813|potassium ion transport;	GO:0005794|Golgi apparatus;GO:0005886|plasma membrane;GO:0008076|voltage-gated potassium channel complex;	GO:0015467|G-protein activated inward rectifier potassium channel activity;GO:0005242|inward rectifier potassium channel activity;	K05000	KCNJ6; potassium inwardly-rectifying channel subfamily J member 6
chr8	121085328	121086510	1183	121086287	68	15.1897	3.02676	10.5395	3_peak_2523	chr8	121084385	121085374	Exon	ENSMUSG00000042812	Foxf1	gi|564321593|ref|XP_001079002.3|	1513	0	PREDICTED: forkhead box protein F1 isoform X1 [Rattus norvegicus]	gi|402534549|ref|NM_010426.2|	2415	0	Mus musculus forkhead box F1 (Foxf1), mRNA	Q61080	582	0	Forkhead box protein F1	SPBC4C3.05	85.5	3e-16	COG5025	pfam00250	Fork_head	Fork head domain.	GO:0009887|organ morphogenesis;GO:0001568|blood vessel development;GO:0060446|branching involved in open tracheal system development;GO:0003214|cardiac left ventricle morphogenesis;GO:0071345|cellular response to cytokine stimulus;GO:0071407|cellular response to organic cyclic compound;GO:0014822|detection of wounding;GO:0007368|determination of left/right symmetry;GO:0048565|digestive tract deve…	GO:0005634|nucleus;	GO:0003677|DNA binding;GO:0000977|RNA polymerase II regulatory region sequence-specific DNA binding;GO:0003705|transcription factor activity, RNA polymerase II distal enhancer sequence-specific binding;GO:0044212|transcription regulatory region DNA binding;GO:0001228|transcriptional activator activity, RNA polymerase II transcription regulatory region sequence-specific binding;	K09399	FOXF; forkhead box protein F
chr8	121085328	121086510	1183	121086287	68	15.1897	3.02676	10.5395	3_peak_2523	chr8	121085374	121086718	Intron	ENSMUSG00000042812	Foxf1	gi|564321593|ref|XP_001079002.3|	1513	0	PREDICTED: forkhead box protein F1 isoform X1 [Rattus norvegicus]	gi|402534549|ref|NM_010426.2|	2415	0	Mus musculus forkhead box F1 (Foxf1), mRNA	Q61080	582	0	Forkhead box protein F1	SPBC4C3.05	85.5	3e-16	COG5025	pfam00250	Fork_head	Fork head domain.	GO:0009887|organ morphogenesis;GO:0001568|blood vessel development;GO:0060446|branching involved in open tracheal system development;GO:0003214|cardiac left ventricle morphogenesis;GO:0071345|cellular response to cytokine stimulus;GO:0071407|cellular response to organic cyclic compound;GO:0014822|detection of wounding;GO:0007368|determination of left/right symmetry;GO:0048565|digestive tract deve…	GO:0005634|nucleus;	GO:0003677|DNA binding;GO:0000977|RNA polymerase II regulatory region sequence-specific DNA binding;GO:0003705|transcription factor activity, RNA polymerase II distal enhancer sequence-specific binding;GO:0044212|transcription regulatory region DNA binding;GO:0001228|transcriptional activator activity, RNA polymerase II transcription regulatory region sequence-specific binding;	K09399	FOXF; forkhead box protein F
chr8	121085328	121086510	1183	121086287	68	15.1897	3.02676	10.5395	3_peak_2523	chr8	121084706	121086706	Upstream2k	ENSMUSG00000098560	Gm27530	gi|957827177|ref|XP_014663430.1|	180	2e-15	PREDICTED: forkhead box protein F1-like, partial [Priapulus caudatus]	gi|402534549|ref|NM_010426.2|	98	7e-43	Mus musculus forkhead box F1 (Foxf1), mRNA	O54743	73.9	3e-16	Forkhead box protein F2	SPBC16G5.15c	45.8	1e-06	COG5025	pfam00250	Fork_head	Fork head domain.	GO:0048596|embryonic camera-type eye morphogenesis;GO:0048566|embryonic digestive tract development;GO:0042249|establishment of planar polarity of embryonic epithelium;GO:0030198|extracellular matrix organization;GO:0048806|genitalia development;GO:0045892|negative regulation of transcription, DNA-templated;GO:0060021|palate development;GO:0045944|positive regulation of transcription from RNA pol…	GO:0005634|nucleus;GO:0005667|transcription factor complex;	GO:0003677|DNA binding;GO:0000977|RNA polymerase II regulatory region sequence-specific DNA binding;GO:0043565|sequence-specific DNA binding;GO:0003705|transcription factor activity, RNA polymerase II distal enhancer sequence-specific binding;GO:0003700|transcription factor activity, sequence-specific DNA binding;GO:0008134|transcription factor binding;GO:0001228|transcriptional activator activit…	K09399	FOXF; forkhead box protein F
chr8	121085328	121086510	1183	121086287	68	15.1897	3.02676	10.5395	3_peak_2523	chr8	119910939	124295357	Intron	ENSMUSG00000092329	Gm20388	gi|31418564|gb|AAH53063.1|	2903	0	Galnt2 protein [Mus musculus]	gi|31418563|gb|BC053063.1|	3950	0	Mus musculus UDP-N-acetyl-alpha-D-galactosamine:polypeptide N-acetylgalactosaminyltransferase 2, mRNA (cDNA clone MGC:62366 IMAGE:5702572), complete cds	Q6PB93	1108	0	Polypeptide N-acetylgalactosaminyltransferase 2	.	.	.	.	pfam00652	Ricin_B_lectin	Ricin-type beta-trefoil lectin domain.	GO:0002378|immunoglobulin biosynthetic process;GO:0016266|O-glycan processing;GO:0006493|protein O-linked glycosylation;GO:0018242|protein O-linked glycosylation via serine;GO:0018243|protein O-linked glycosylation via threonine;	GO:0070062|extracellular exosome;GO:0005794|Golgi apparatus;GO:0032580|Golgi cisterna membrane;GO:0005796|Golgi lumen;GO:0005795|Golgi stack;GO:0016021|integral component of membrane;GO:0016020|membrane;GO:0048471|perinuclear region of cytoplasm;	GO:0030246|carbohydrate binding;GO:0030145|manganese ion binding;GO:0004653|polypeptide N-acetylgalactosaminyltransferase activity;	K00710	GALNT; polypeptide N-acetylgalactosaminyltransferase [EC:2.4.1.41]
chr9	86879507	86880332	826	86879892	33	15.3233	5.12859	10.6599	3_peak_2637	chr9	86879421	86879581	Exon	ENSMUSG00000033419	Snap91	gi|354466442|ref|XP_003495683.1|	2977	0	PREDICTED: clathrin coat assembly protein AP180 isoform X2 [Cricetulus griseus]	gi|26006192|dbj|AB093255.1|	5267	0	Mus musculus mRNA for mKIAA0656 protein	O60641	236	6e-64	Clathrin coat assembly protein AP180	.	.	.	.	pfam07651	ANTH	ANTH domain. AP180 is an endocytotic accessory proteins that has been implicated in the formation of clathrin-coated pits. The domain is involved in phosphatidylinositol 4,5-bisphosphate binding and is a universal adaptor for nucleation of clathrin coats.	GO:0007268|synaptic transmission;GO:0048268|clathrin coat assembly;GO:0015031|protein transport;GO:2000369|regulation of clathrin-mediated endocytosis;	GO:0005905|coated pit;GO:0030136|clathrin-coated vesicle;GO:0005886|plasma membrane;	GO:0005545|1-phosphatidylinositol binding;GO:0019901|protein kinase binding;	.	.
chr9	86879507	86880332	826	86879892	33	15.3233	5.12859	10.6599	3_peak_2637	chr9	86880260	86880414	Exon	ENSMUSG00000033419	Snap91	gi|354466442|ref|XP_003495683.1|	2977	0	PREDICTED: clathrin coat assembly protein AP180 isoform X2 [Cricetulus griseus]	gi|26006192|dbj|AB093255.1|	5267	0	Mus musculus mRNA for mKIAA0656 protein	O60641	236	6e-64	Clathrin coat assembly protein AP180	.	.	.	.	pfam07651	ANTH	ANTH domain. AP180 is an endocytotic accessory proteins that has been implicated in the formation of clathrin-coated pits. The domain is involved in phosphatidylinositol 4,5-bisphosphate binding and is a universal adaptor for nucleation of clathrin coats.	GO:0007268|synaptic transmission;GO:0048268|clathrin coat assembly;GO:0015031|protein transport;GO:2000369|regulation of clathrin-mediated endocytosis;	GO:0005905|coated pit;GO:0030136|clathrin-coated vesicle;GO:0005886|plasma membrane;	GO:0005545|1-phosphatidylinositol binding;GO:0019901|protein kinase binding;	.	.
chr9	86879507	86880332	826	86879892	33	15.3233	5.12859	10.6599	3_peak_2637	chr9	86880260	86880439	Exon	ENSMUSG00000033419	Snap91	gi|354466442|ref|XP_003495683.1|	2977	0	PREDICTED: clathrin coat assembly protein AP180 isoform X2 [Cricetulus griseus]	gi|26006192|dbj|AB093255.1|	5267	0	Mus musculus mRNA for mKIAA0656 protein	O60641	236	6e-64	Clathrin coat assembly protein AP180	.	.	.	.	pfam07651	ANTH	ANTH domain. AP180 is an endocytotic accessory proteins that has been implicated in the formation of clathrin-coated pits. The domain is involved in phosphatidylinositol 4,5-bisphosphate binding and is a universal adaptor for nucleation of clathrin coats.	GO:0007268|synaptic transmission;GO:0048268|clathrin coat assembly;GO:0015031|protein transport;GO:2000369|regulation of clathrin-mediated endocytosis;	GO:0005905|coated pit;GO:0030136|clathrin-coated vesicle;GO:0005886|plasma membrane;	GO:0005545|1-phosphatidylinositol binding;GO:0019901|protein kinase binding;	.	.
chr9	86879507	86880332	826	86879892	33	15.3233	5.12859	10.6599	3_peak_2637	chr9	86880260	86880449	Exon	ENSMUSG00000033419	Snap91	gi|354466442|ref|XP_003495683.1|	2977	0	PREDICTED: clathrin coat assembly protein AP180 isoform X2 [Cricetulus griseus]	gi|26006192|dbj|AB093255.1|	5267	0	Mus musculus mRNA for mKIAA0656 protein	O60641	236	6e-64	Clathrin coat assembly protein AP180	.	.	.	.	pfam07651	ANTH	ANTH domain. AP180 is an endocytotic accessory proteins that has been implicated in the formation of clathrin-coated pits. The domain is involved in phosphatidylinositol 4,5-bisphosphate binding and is a universal adaptor for nucleation of clathrin coats.	GO:0007268|synaptic transmission;GO:0048268|clathrin coat assembly;GO:0015031|protein transport;GO:2000369|regulation of clathrin-mediated endocytosis;	GO:0005905|coated pit;GO:0030136|clathrin-coated vesicle;GO:0005886|plasma membrane;	GO:0005545|1-phosphatidylinositol binding;GO:0019901|protein kinase binding;	.	.
chr9	86879507	86880332	826	86879892	33	15.3233	5.12859	10.6599	3_peak_2637	chr9	86880320	86880397	Exon	ENSMUSG00000033419	Snap91	gi|354466442|ref|XP_003495683.1|	2977	0	PREDICTED: clathrin coat assembly protein AP180 isoform X2 [Cricetulus griseus]	gi|26006192|dbj|AB093255.1|	5267	0	Mus musculus mRNA for mKIAA0656 protein	O60641	236	6e-64	Clathrin coat assembly protein AP180	.	.	.	.	pfam07651	ANTH	ANTH domain. AP180 is an endocytotic accessory proteins that has been implicated in the formation of clathrin-coated pits. The domain is involved in phosphatidylinositol 4,5-bisphosphate binding and is a universal adaptor for nucleation of clathrin coats.	GO:0007268|synaptic transmission;GO:0048268|clathrin coat assembly;GO:0015031|protein transport;GO:2000369|regulation of clathrin-mediated endocytosis;	GO:0005905|coated pit;GO:0030136|clathrin-coated vesicle;GO:0005886|plasma membrane;	GO:0005545|1-phosphatidylinositol binding;GO:0019901|protein kinase binding;	.	.
chr9	86879507	86880332	826	86879892	33	15.3233	5.12859	10.6599	3_peak_2637	chr9	86879581	86880260	Intron	ENSMUSG00000033419	Snap91	gi|354466442|ref|XP_003495683.1|	2977	0	PREDICTED: clathrin coat assembly protein AP180 isoform X2 [Cricetulus griseus]	gi|26006192|dbj|AB093255.1|	5267	0	Mus musculus mRNA for mKIAA0656 protein	O60641	236	6e-64	Clathrin coat assembly protein AP180	.	.	.	.	pfam07651	ANTH	ANTH domain. AP180 is an endocytotic accessory proteins that has been implicated in the formation of clathrin-coated pits. The domain is involved in phosphatidylinositol 4,5-bisphosphate binding and is a universal adaptor for nucleation of clathrin coats.	GO:0007268|synaptic transmission;GO:0048268|clathrin coat assembly;GO:0015031|protein transport;GO:2000369|regulation of clathrin-mediated endocytosis;	GO:0005905|coated pit;GO:0030136|clathrin-coated vesicle;GO:0005886|plasma membrane;	GO:0005545|1-phosphatidylinositol binding;GO:0019901|protein kinase binding;	.	.
chr9	86879507	86880332	826	86879892	33	15.3233	5.12859	10.6599	3_peak_2637	chr9	86879581	86880320	Intron	ENSMUSG00000033419	Snap91	gi|354466442|ref|XP_003495683.1|	2977	0	PREDICTED: clathrin coat assembly protein AP180 isoform X2 [Cricetulus griseus]	gi|26006192|dbj|AB093255.1|	5267	0	Mus musculus mRNA for mKIAA0656 protein	O60641	236	6e-64	Clathrin coat assembly protein AP180	.	.	.	.	pfam07651	ANTH	ANTH domain. AP180 is an endocytotic accessory proteins that has been implicated in the formation of clathrin-coated pits. The domain is involved in phosphatidylinositol 4,5-bisphosphate binding and is a universal adaptor for nucleation of clathrin coats.	GO:0007268|synaptic transmission;GO:0048268|clathrin coat assembly;GO:0015031|protein transport;GO:2000369|regulation of clathrin-mediated endocytosis;	GO:0005905|coated pit;GO:0030136|clathrin-coated vesicle;GO:0005886|plasma membrane;	GO:0005545|1-phosphatidylinositol binding;GO:0019901|protein kinase binding;	.	.
chr9	86879507	86880332	826	86879892	33	15.3233	5.12859	10.6599	3_peak_2637	chr9	86879581	86880471	Intron	ENSMUSG00000033419	Snap91	gi|354466442|ref|XP_003495683.1|	2977	0	PREDICTED: clathrin coat assembly protein AP180 isoform X2 [Cricetulus griseus]	gi|26006192|dbj|AB093255.1|	5267	0	Mus musculus mRNA for mKIAA0656 protein	O60641	236	6e-64	Clathrin coat assembly protein AP180	.	.	.	.	pfam07651	ANTH	ANTH domain. AP180 is an endocytotic accessory proteins that has been implicated in the formation of clathrin-coated pits. The domain is involved in phosphatidylinositol 4,5-bisphosphate binding and is a universal adaptor for nucleation of clathrin coats.	GO:0007268|synaptic transmission;GO:0048268|clathrin coat assembly;GO:0015031|protein transport;GO:2000369|regulation of clathrin-mediated endocytosis;	GO:0005905|coated pit;GO:0030136|clathrin-coated vesicle;GO:0005886|plasma membrane;	GO:0005545|1-phosphatidylinositol binding;GO:0019901|protein kinase binding;	.	.
chr9	86879507	86880332	826	86879892	33	15.3233	5.12859	10.6599	3_peak_2637	chr9	86879551	86879581	UTR5	ENSMUSG00000033419	Snap91	gi|354466442|ref|XP_003495683.1|	2977	0	PREDICTED: clathrin coat assembly protein AP180 isoform X2 [Cricetulus griseus]	gi|26006192|dbj|AB093255.1|	5267	0	Mus musculus mRNA for mKIAA0656 protein	O60641	236	6e-64	Clathrin coat assembly protein AP180	.	.	.	.	pfam07651	ANTH	ANTH domain. AP180 is an endocytotic accessory proteins that has been implicated in the formation of clathrin-coated pits. The domain is involved in phosphatidylinositol 4,5-bisphosphate binding and is a universal adaptor for nucleation of clathrin coats.	GO:0007268|synaptic transmission;GO:0048268|clathrin coat assembly;GO:0015031|protein transport;GO:2000369|regulation of clathrin-mediated endocytosis;	GO:0005905|coated pit;GO:0030136|clathrin-coated vesicle;GO:0005886|plasma membrane;	GO:0005545|1-phosphatidylinositol binding;GO:0019901|protein kinase binding;	.	.
chr9	86879507	86880332	826	86879892	33	15.3233	5.12859	10.6599	3_peak_2637	chr9	86880260	86880449	UTR5	ENSMUSG00000033419	Snap91	gi|354466442|ref|XP_003495683.1|	2977	0	PREDICTED: clathrin coat assembly protein AP180 isoform X2 [Cricetulus griseus]	gi|26006192|dbj|AB093255.1|	5267	0	Mus musculus mRNA for mKIAA0656 protein	O60641	236	6e-64	Clathrin coat assembly protein AP180	.	.	.	.	pfam07651	ANTH	ANTH domain. AP180 is an endocytotic accessory proteins that has been implicated in the formation of clathrin-coated pits. The domain is involved in phosphatidylinositol 4,5-bisphosphate binding and is a universal adaptor for nucleation of clathrin coats.	GO:0007268|synaptic transmission;GO:0048268|clathrin coat assembly;GO:0015031|protein transport;GO:2000369|regulation of clathrin-mediated endocytosis;	GO:0005905|coated pit;GO:0030136|clathrin-coated vesicle;GO:0005886|plasma membrane;	GO:0005545|1-phosphatidylinositol binding;GO:0019901|protein kinase binding;	.	.
chr9	86879507	86880332	826	86879892	33	15.3233	5.12859	10.6599	3_peak_2637	chr9	86880260	86880439	UTR5	ENSMUSG00000033419	Snap91	gi|354466442|ref|XP_003495683.1|	2977	0	PREDICTED: clathrin coat assembly protein AP180 isoform X2 [Cricetulus griseus]	gi|26006192|dbj|AB093255.1|	5267	0	Mus musculus mRNA for mKIAA0656 protein	O60641	236	6e-64	Clathrin coat assembly protein AP180	.	.	.	.	pfam07651	ANTH	ANTH domain. AP180 is an endocytotic accessory proteins that has been implicated in the formation of clathrin-coated pits. The domain is involved in phosphatidylinositol 4,5-bisphosphate binding and is a universal adaptor for nucleation of clathrin coats.	GO:0007268|synaptic transmission;GO:0048268|clathrin coat assembly;GO:0015031|protein transport;GO:2000369|regulation of clathrin-mediated endocytosis;	GO:0005905|coated pit;GO:0030136|clathrin-coated vesicle;GO:0005886|plasma membrane;	GO:0005545|1-phosphatidylinositol binding;GO:0019901|protein kinase binding;	.	.
chr9	86879507	86880332	826	86879892	33	15.3233	5.12859	10.6599	3_peak_2637	chr9	86880260	86880414	UTR5	ENSMUSG00000033419	Snap91	gi|354466442|ref|XP_003495683.1|	2977	0	PREDICTED: clathrin coat assembly protein AP180 isoform X2 [Cricetulus griseus]	gi|26006192|dbj|AB093255.1|	5267	0	Mus musculus mRNA for mKIAA0656 protein	O60641	236	6e-64	Clathrin coat assembly protein AP180	.	.	.	.	pfam07651	ANTH	ANTH domain. AP180 is an endocytotic accessory proteins that has been implicated in the formation of clathrin-coated pits. The domain is involved in phosphatidylinositol 4,5-bisphosphate binding and is a universal adaptor for nucleation of clathrin coats.	GO:0007268|synaptic transmission;GO:0048268|clathrin coat assembly;GO:0015031|protein transport;GO:2000369|regulation of clathrin-mediated endocytosis;	GO:0005905|coated pit;GO:0030136|clathrin-coated vesicle;GO:0005886|plasma membrane;	GO:0005545|1-phosphatidylinositol binding;GO:0019901|protein kinase binding;	.	.
chr9	86879507	86880332	826	86879892	33	15.3233	5.12859	10.6599	3_peak_2637	chr9	86880320	86880397	UTR5	ENSMUSG00000033419	Snap91	gi|354466442|ref|XP_003495683.1|	2977	0	PREDICTED: clathrin coat assembly protein AP180 isoform X2 [Cricetulus griseus]	gi|26006192|dbj|AB093255.1|	5267	0	Mus musculus mRNA for mKIAA0656 protein	O60641	236	6e-64	Clathrin coat assembly protein AP180	.	.	.	.	pfam07651	ANTH	ANTH domain. AP180 is an endocytotic accessory proteins that has been implicated in the formation of clathrin-coated pits. The domain is involved in phosphatidylinositol 4,5-bisphosphate binding and is a universal adaptor for nucleation of clathrin coats.	GO:0007268|synaptic transmission;GO:0048268|clathrin coat assembly;GO:0015031|protein transport;GO:2000369|regulation of clathrin-mediated endocytosis;	GO:0005905|coated pit;GO:0030136|clathrin-coated vesicle;GO:0005886|plasma membrane;	GO:0005545|1-phosphatidylinositol binding;GO:0019901|protein kinase binding;	.	.
chrX	60896723	60897302	580	60896975	39	8.32123	2.74352	4.42619	3_peak_2717	chrX	60894881	60897713	Intron	ENSMUSG00000087565	Gm14662	.	.	.	.	gi|644985859|tpe|HG982408.1|	734	0	TPA: Mus musculus long non-coding RNA OTTMUST00000042795.1 (RP23-174O19.2 gene), antisense	.	.	.	.	.	.	.	.	pfam04621	ETS_PEA3_N	PEA3 subfamily ETS-domain transcription factor N terminal domain. The N terminus of the PEA3 transcription factors is implicated in transactivation and in inhibition of DNA binding. Transactivation is potentiated by activation of the Ras/MAP kinase and protein kinase A signalling cascades. The N terminal region contains conserved MAP kinase phosphorylation sites.	.	.	.	.	.
chr9	51176075	51176412	338	51176336	11	5.39507	3.71896	2.1365	3_peak_2585	-//-	-//-	-//-	--//--
chr9	49797852	49798935	1084	49798251	51	12.7958	3.18926	8.34748	3_peak_2580	chr9	49798677	49798925	Exon	ENSMUSG00000039542	Ncam1	gi|568958952|ref|XP_006510125.1|	4802	0	PREDICTED: neural cell adhesion molecule 1 isoform X8 [Mus musculus]	gi|568958951|ref|XM_006510062.1|	6556	0	PREDICTED: Mus musculus neural cell adhesion molecule 1 (Ncam1), transcript variant X8, mRNA	P13595	1800	0	Neural cell adhesion molecule 1	.	.	.	.	pfam07679	I-set	Immunoglobulin I-set domain.	GO:0007568|aging;GO:0031100|organ regeneration;GO:0007411|axon guidance;GO:0016338|calcium-independent cell-cell adhesion via plasma membrane cell-adhesion molecules;GO:0007155|cell adhesion;GO:0071241|cellular response to inorganic substance;GO:0071219|cellular response to molecule of bacterial origin;GO:0007611|learning or memory;GO:0033555|multicellular organismal response to stress;GO:0060548…	GO:0030426|growth cone;GO:0016021|integral component of membrane;GO:0043025|neuronal cell body;GO:0005886|plasma membrane;	GO:0008092|cytoskeletal protein binding;GO:0005104|fibroblast growth factor receptor binding;GO:0008201|heparin binding;GO:0030275|LRR domain binding;GO:0019902|phosphatase binding;	K06491	NCAM; neural cell adhesion molecule
chr9	49797852	49798935	1084	49798251	51	12.7958	3.18926	8.34748	3_peak_2580	chr9	49798677	49798922	Exon	ENSMUSG00000039542	Ncam1	gi|568958952|ref|XP_006510125.1|	4802	0	PREDICTED: neural cell adhesion molecule 1 isoform X8 [Mus musculus]	gi|568958951|ref|XM_006510062.1|	6556	0	PREDICTED: Mus musculus neural cell adhesion molecule 1 (Ncam1), transcript variant X8, mRNA	P13595	1800	0	Neural cell adhesion molecule 1	.	.	.	.	pfam07679	I-set	Immunoglobulin I-set domain.	GO:0007568|aging;GO:0031100|organ regeneration;GO:0007411|axon guidance;GO:0016338|calcium-independent cell-cell adhesion via plasma membrane cell-adhesion molecules;GO:0007155|cell adhesion;GO:0071241|cellular response to inorganic substance;GO:0071219|cellular response to molecule of bacterial origin;GO:0007611|learning or memory;GO:0033555|multicellular organismal response to stress;GO:0060548…	GO:0030426|growth cone;GO:0016021|integral component of membrane;GO:0043025|neuronal cell body;GO:0005886|plasma membrane;	GO:0008092|cytoskeletal protein binding;GO:0005104|fibroblast growth factor receptor binding;GO:0008201|heparin binding;GO:0030275|LRR domain binding;GO:0019902|phosphatase binding;	K06491	NCAM; neural cell adhesion molecule
chr9	49797852	49798935	1084	49798251	51	12.7958	3.18926	8.34748	3_peak_2580	chr9	49798677	49798890	Exon	ENSMUSG00000039542	Ncam1	gi|568958952|ref|XP_006510125.1|	4802	0	PREDICTED: neural cell adhesion molecule 1 isoform X8 [Mus musculus]	gi|568958951|ref|XM_006510062.1|	6556	0	PREDICTED: Mus musculus neural cell adhesion molecule 1 (Ncam1), transcript variant X8, mRNA	P13595	1800	0	Neural cell adhesion molecule 1	.	.	.	.	pfam07679	I-set	Immunoglobulin I-set domain.	GO:0007568|aging;GO:0031100|organ regeneration;GO:0007411|axon guidance;GO:0016338|calcium-independent cell-cell adhesion via plasma membrane cell-adhesion molecules;GO:0007155|cell adhesion;GO:0071241|cellular response to inorganic substance;GO:0071219|cellular response to molecule of bacterial origin;GO:0007611|learning or memory;GO:0033555|multicellular organismal response to stress;GO:0060548…	GO:0030426|growth cone;GO:0016021|integral component of membrane;GO:0043025|neuronal cell body;GO:0005886|plasma membrane;	GO:0008092|cytoskeletal protein binding;GO:0005104|fibroblast growth factor receptor binding;GO:0008201|heparin binding;GO:0030275|LRR domain binding;GO:0019902|phosphatase binding;	K06491	NCAM; neural cell adhesion molecule
chr9	49797852	49798935	1084	49798251	51	12.7958	3.18926	8.34748	3_peak_2580	chr9	49798677	49798872	Exon	ENSMUSG00000039542	Ncam1	gi|568958952|ref|XP_006510125.1|	4802	0	PREDICTED: neural cell adhesion molecule 1 isoform X8 [Mus musculus]	gi|568958951|ref|XM_006510062.1|	6556	0	PREDICTED: Mus musculus neural cell adhesion molecule 1 (Ncam1), transcript variant X8, mRNA	P13595	1800	0	Neural cell adhesion molecule 1	.	.	.	.	pfam07679	I-set	Immunoglobulin I-set domain.	GO:0007568|aging;GO:0031100|organ regeneration;GO:0007411|axon guidance;GO:0016338|calcium-independent cell-cell adhesion via plasma membrane cell-adhesion molecules;GO:0007155|cell adhesion;GO:0071241|cellular response to inorganic substance;GO:0071219|cellular response to molecule of bacterial origin;GO:0007611|learning or memory;GO:0033555|multicellular organismal response to stress;GO:0060548…	GO:0030426|growth cone;GO:0016021|integral component of membrane;GO:0043025|neuronal cell body;GO:0005886|plasma membrane;	GO:0008092|cytoskeletal protein binding;GO:0005104|fibroblast growth factor receptor binding;GO:0008201|heparin binding;GO:0030275|LRR domain binding;GO:0019902|phosphatase binding;	K06491	NCAM; neural cell adhesion molecule
chr9	49797852	49798935	1084	49798251	51	12.7958	3.18926	8.34748	3_peak_2580	chr9	49798677	49798758	Exon	ENSMUSG00000039542	Ncam1	gi|568958952|ref|XP_006510125.1|	4802	0	PREDICTED: neural cell adhesion molecule 1 isoform X8 [Mus musculus]	gi|568958951|ref|XM_006510062.1|	6556	0	PREDICTED: Mus musculus neural cell adhesion molecule 1 (Ncam1), transcript variant X8, mRNA	P13595	1800	0	Neural cell adhesion molecule 1	.	.	.	.	pfam07679	I-set	Immunoglobulin I-set domain.	GO:0007568|aging;GO:0031100|organ regeneration;GO:0007411|axon guidance;GO:0016338|calcium-independent cell-cell adhesion via plasma membrane cell-adhesion molecules;GO:0007155|cell adhesion;GO:0071241|cellular response to inorganic substance;GO:0071219|cellular response to molecule of bacterial origin;GO:0007611|learning or memory;GO:0033555|multicellular organismal response to stress;GO:0060548…	GO:0030426|growth cone;GO:0016021|integral component of membrane;GO:0043025|neuronal cell body;GO:0005886|plasma membrane;	GO:0008092|cytoskeletal protein binding;GO:0005104|fibroblast growth factor receptor binding;GO:0008201|heparin binding;GO:0030275|LRR domain binding;GO:0019902|phosphatase binding;	K06491	NCAM; neural cell adhesion molecule
chr9	49797852	49798935	1084	49798251	51	12.7958	3.18926	8.34748	3_peak_2580	chr9	49798925	49800925	Upstream2k	ENSMUSG00000039542	Ncam1	gi|568958952|ref|XP_006510125.1|	4802	0	PREDICTED: neural cell adhesion molecule 1 isoform X8 [Mus musculus]	gi|568958951|ref|XM_006510062.1|	6556	0	PREDICTED: Mus musculus neural cell adhesion molecule 1 (Ncam1), transcript variant X8, mRNA	P13595	1800	0	Neural cell adhesion molecule 1	.	.	.	.	pfam07679	I-set	Immunoglobulin I-set domain.	GO:0007568|aging;GO:0031100|organ regeneration;GO:0007411|axon guidance;GO:0016338|calcium-independent cell-cell adhesion via plasma membrane cell-adhesion molecules;GO:0007155|cell adhesion;GO:0071241|cellular response to inorganic substance;GO:0071219|cellular response to molecule of bacterial origin;GO:0007611|learning or memory;GO:0033555|multicellular organismal response to stress;GO:0060548…	GO:0030426|growth cone;GO:0016021|integral component of membrane;GO:0043025|neuronal cell body;GO:0005886|plasma membrane;	GO:0008092|cytoskeletal protein binding;GO:0005104|fibroblast growth factor receptor binding;GO:0008201|heparin binding;GO:0030275|LRR domain binding;GO:0019902|phosphatase binding;	K06491	NCAM; neural cell adhesion molecule
chr9	49797852	49798935	1084	49798251	51	12.7958	3.18926	8.34748	3_peak_2580	chr9	49798872	49800872	Upstream2k	ENSMUSG00000039542	Ncam1	gi|568958952|ref|XP_006510125.1|	4802	0	PREDICTED: neural cell adhesion molecule 1 isoform X8 [Mus musculus]	gi|568958951|ref|XM_006510062.1|	6556	0	PREDICTED: Mus musculus neural cell adhesion molecule 1 (Ncam1), transcript variant X8, mRNA	P13595	1800	0	Neural cell adhesion molecule 1	.	.	.	.	pfam07679	I-set	Immunoglobulin I-set domain.	GO:0007568|aging;GO:0031100|organ regeneration;GO:0007411|axon guidance;GO:0016338|calcium-independent cell-cell adhesion via plasma membrane cell-adhesion molecules;GO:0007155|cell adhesion;GO:0071241|cellular response to inorganic substance;GO:0071219|cellular response to molecule of bacterial origin;GO:0007611|learning or memory;GO:0033555|multicellular organismal response to stress;GO:0060548…	GO:0030426|growth cone;GO:0016021|integral component of membrane;GO:0043025|neuronal cell body;GO:0005886|plasma membrane;	GO:0008092|cytoskeletal protein binding;GO:0005104|fibroblast growth factor receptor binding;GO:0008201|heparin binding;GO:0030275|LRR domain binding;GO:0019902|phosphatase binding;	K06491	NCAM; neural cell adhesion molecule
chr9	49797852	49798935	1084	49798251	51	12.7958	3.18926	8.34748	3_peak_2580	chr9	49798890	49800890	Upstream2k	ENSMUSG00000039542	Ncam1	gi|568958952|ref|XP_006510125.1|	4802	0	PREDICTED: neural cell adhesion molecule 1 isoform X8 [Mus musculus]	gi|568958951|ref|XM_006510062.1|	6556	0	PREDICTED: Mus musculus neural cell adhesion molecule 1 (Ncam1), transcript variant X8, mRNA	P13595	1800	0	Neural cell adhesion molecule 1	.	.	.	.	pfam07679	I-set	Immunoglobulin I-set domain.	GO:0007568|aging;GO:0031100|organ regeneration;GO:0007411|axon guidance;GO:0016338|calcium-independent cell-cell adhesion via plasma membrane cell-adhesion molecules;GO:0007155|cell adhesion;GO:0071241|cellular response to inorganic substance;GO:0071219|cellular response to molecule of bacterial origin;GO:0007611|learning or memory;GO:0033555|multicellular organismal response to stress;GO:0060548…	GO:0030426|growth cone;GO:0016021|integral component of membrane;GO:0043025|neuronal cell body;GO:0005886|plasma membrane;	GO:0008092|cytoskeletal protein binding;GO:0005104|fibroblast growth factor receptor binding;GO:0008201|heparin binding;GO:0030275|LRR domain binding;GO:0019902|phosphatase binding;	K06491	NCAM; neural cell adhesion molecule
chr9	49797852	49798935	1084	49798251	51	12.7958	3.18926	8.34748	3_peak_2580	chr9	49798758	49800758	Upstream2k	ENSMUSG00000039542	Ncam1	gi|568958952|ref|XP_006510125.1|	4802	0	PREDICTED: neural cell adhesion molecule 1 isoform X8 [Mus musculus]	gi|568958951|ref|XM_006510062.1|	6556	0	PREDICTED: Mus musculus neural cell adhesion molecule 1 (Ncam1), transcript variant X8, mRNA	P13595	1800	0	Neural cell adhesion molecule 1	.	.	.	.	pfam07679	I-set	Immunoglobulin I-set domain.	GO:0007568|aging;GO:0031100|organ regeneration;GO:0007411|axon guidance;GO:0016338|calcium-independent cell-cell adhesion via plasma membrane cell-adhesion molecules;GO:0007155|cell adhesion;GO:0071241|cellular response to inorganic substance;GO:0071219|cellular response to molecule of bacterial origin;GO:0007611|learning or memory;GO:0033555|multicellular organismal response to stress;GO:0060548…	GO:0030426|growth cone;GO:0016021|integral component of membrane;GO:0043025|neuronal cell body;GO:0005886|plasma membrane;	GO:0008092|cytoskeletal protein binding;GO:0005104|fibroblast growth factor receptor binding;GO:0008201|heparin binding;GO:0030275|LRR domain binding;GO:0019902|phosphatase binding;	K06491	NCAM; neural cell adhesion molecule
chr9	49797852	49798935	1084	49798251	51	12.7958	3.18926	8.34748	3_peak_2580	chr9	49798922	49800922	Upstream2k	ENSMUSG00000039542	Ncam1	gi|568958952|ref|XP_006510125.1|	4802	0	PREDICTED: neural cell adhesion molecule 1 isoform X8 [Mus musculus]	gi|568958951|ref|XM_006510062.1|	6556	0	PREDICTED: Mus musculus neural cell adhesion molecule 1 (Ncam1), transcript variant X8, mRNA	P13595	1800	0	Neural cell adhesion molecule 1	.	.	.	.	pfam07679	I-set	Immunoglobulin I-set domain.	GO:0007568|aging;GO:0031100|organ regeneration;GO:0007411|axon guidance;GO:0016338|calcium-independent cell-cell adhesion via plasma membrane cell-adhesion molecules;GO:0007155|cell adhesion;GO:0071241|cellular response to inorganic substance;GO:0071219|cellular response to molecule of bacterial origin;GO:0007611|learning or memory;GO:0033555|multicellular organismal response to stress;GO:0060548…	GO:0030426|growth cone;GO:0016021|integral component of membrane;GO:0043025|neuronal cell body;GO:0005886|plasma membrane;	GO:0008092|cytoskeletal protein binding;GO:0005104|fibroblast growth factor receptor binding;GO:0008201|heparin binding;GO:0030275|LRR domain binding;GO:0019902|phosphatase binding;	K06491	NCAM; neural cell adhesion molecule
chr9	49797852	49798935	1084	49798251	51	12.7958	3.18926	8.34748	3_peak_2580	chr9	49798729	49798758	UTR5	ENSMUSG00000039542	Ncam1	gi|568958952|ref|XP_006510125.1|	4802	0	PREDICTED: neural cell adhesion molecule 1 isoform X8 [Mus musculus]	gi|568958951|ref|XM_006510062.1|	6556	0	PREDICTED: Mus musculus neural cell adhesion molecule 1 (Ncam1), transcript variant X8, mRNA	P13595	1800	0	Neural cell adhesion molecule 1	.	.	.	.	pfam07679	I-set	Immunoglobulin I-set domain.	GO:0007568|aging;GO:0031100|organ regeneration;GO:0007411|axon guidance;GO:0016338|calcium-independent cell-cell adhesion via plasma membrane cell-adhesion molecules;GO:0007155|cell adhesion;GO:0071241|cellular response to inorganic substance;GO:0071219|cellular response to molecule of bacterial origin;GO:0007611|learning or memory;GO:0033555|multicellular organismal response to stress;GO:0060548…	GO:0030426|growth cone;GO:0016021|integral component of membrane;GO:0043025|neuronal cell body;GO:0005886|plasma membrane;	GO:0008092|cytoskeletal protein binding;GO:0005104|fibroblast growth factor receptor binding;GO:0008201|heparin binding;GO:0030275|LRR domain binding;GO:0019902|phosphatase binding;	K06491	NCAM; neural cell adhesion molecule
chr9	49797852	49798935	1084	49798251	51	12.7958	3.18926	8.34748	3_peak_2580	chr9	49798729	49798872	UTR5	ENSMUSG00000039542	Ncam1	gi|568958952|ref|XP_006510125.1|	4802	0	PREDICTED: neural cell adhesion molecule 1 isoform X8 [Mus musculus]	gi|568958951|ref|XM_006510062.1|	6556	0	PREDICTED: Mus musculus neural cell adhesion molecule 1 (Ncam1), transcript variant X8, mRNA	P13595	1800	0	Neural cell adhesion molecule 1	.	.	.	.	pfam07679	I-set	Immunoglobulin I-set domain.	GO:0007568|aging;GO:0031100|organ regeneration;GO:0007411|axon guidance;GO:0016338|calcium-independent cell-cell adhesion via plasma membrane cell-adhesion molecules;GO:0007155|cell adhesion;GO:0071241|cellular response to inorganic substance;GO:0071219|cellular response to molecule of bacterial origin;GO:0007611|learning or memory;GO:0033555|multicellular organismal response to stress;GO:0060548…	GO:0030426|growth cone;GO:0016021|integral component of membrane;GO:0043025|neuronal cell body;GO:0005886|plasma membrane;	GO:0008092|cytoskeletal protein binding;GO:0005104|fibroblast growth factor receptor binding;GO:0008201|heparin binding;GO:0030275|LRR domain binding;GO:0019902|phosphatase binding;	K06491	NCAM; neural cell adhesion molecule
chr9	49797852	49798935	1084	49798251	51	12.7958	3.18926	8.34748	3_peak_2580	chr9	49798729	49798890	UTR5	ENSMUSG00000039542	Ncam1	gi|568958952|ref|XP_006510125.1|	4802	0	PREDICTED: neural cell adhesion molecule 1 isoform X8 [Mus musculus]	gi|568958951|ref|XM_006510062.1|	6556	0	PREDICTED: Mus musculus neural cell adhesion molecule 1 (Ncam1), transcript variant X8, mRNA	P13595	1800	0	Neural cell adhesion molecule 1	.	.	.	.	pfam07679	I-set	Immunoglobulin I-set domain.	GO:0007568|aging;GO:0031100|organ regeneration;GO:0007411|axon guidance;GO:0016338|calcium-independent cell-cell adhesion via plasma membrane cell-adhesion molecules;GO:0007155|cell adhesion;GO:0071241|cellular response to inorganic substance;GO:0071219|cellular response to molecule of bacterial origin;GO:0007611|learning or memory;GO:0033555|multicellular organismal response to stress;GO:0060548…	GO:0030426|growth cone;GO:0016021|integral component of membrane;GO:0043025|neuronal cell body;GO:0005886|plasma membrane;	GO:0008092|cytoskeletal protein binding;GO:0005104|fibroblast growth factor receptor binding;GO:0008201|heparin binding;GO:0030275|LRR domain binding;GO:0019902|phosphatase binding;	K06491	NCAM; neural cell adhesion molecule
chr9	49797852	49798935	1084	49798251	51	12.7958	3.18926	8.34748	3_peak_2580	chr9	49798729	49798925	UTR5	ENSMUSG00000039542	Ncam1	gi|568958952|ref|XP_006510125.1|	4802	0	PREDICTED: neural cell adhesion molecule 1 isoform X8 [Mus musculus]	gi|568958951|ref|XM_006510062.1|	6556	0	PREDICTED: Mus musculus neural cell adhesion molecule 1 (Ncam1), transcript variant X8, mRNA	P13595	1800	0	Neural cell adhesion molecule 1	.	.	.	.	pfam07679	I-set	Immunoglobulin I-set domain.	GO:0007568|aging;GO:0031100|organ regeneration;GO:0007411|axon guidance;GO:0016338|calcium-independent cell-cell adhesion via plasma membrane cell-adhesion molecules;GO:0007155|cell adhesion;GO:0071241|cellular response to inorganic substance;GO:0071219|cellular response to molecule of bacterial origin;GO:0007611|learning or memory;GO:0033555|multicellular organismal response to stress;GO:0060548…	GO:0030426|growth cone;GO:0016021|integral component of membrane;GO:0043025|neuronal cell body;GO:0005886|plasma membrane;	GO:0008092|cytoskeletal protein binding;GO:0005104|fibroblast growth factor receptor binding;GO:0008201|heparin binding;GO:0030275|LRR domain binding;GO:0019902|phosphatase binding;	K06491	NCAM; neural cell adhesion molecule
chr9	49797852	49798935	1084	49798251	51	12.7958	3.18926	8.34748	3_peak_2580	chr9	49569900	49798677	Intron	ENSMUSG00000039542	Ncam1	gi|568958952|ref|XP_006510125.1|	4802	0	PREDICTED: neural cell adhesion molecule 1 isoform X8 [Mus musculus]	gi|568958951|ref|XM_006510062.1|	6556	0	PREDICTED: Mus musculus neural cell adhesion molecule 1 (Ncam1), transcript variant X8, mRNA	P13595	1800	0	Neural cell adhesion molecule 1	.	.	.	.	pfam07679	I-set	Immunoglobulin I-set domain.	GO:0007568|aging;GO:0031100|organ regeneration;GO:0007411|axon guidance;GO:0016338|calcium-independent cell-cell adhesion via plasma membrane cell-adhesion molecules;GO:0007155|cell adhesion;GO:0071241|cellular response to inorganic substance;GO:0071219|cellular response to molecule of bacterial origin;GO:0007611|learning or memory;GO:0033555|multicellular organismal response to stress;GO:0060548…	GO:0030426|growth cone;GO:0016021|integral component of membrane;GO:0043025|neuronal cell body;GO:0005886|plasma membrane;	GO:0008092|cytoskeletal protein binding;GO:0005104|fibroblast growth factor receptor binding;GO:0008201|heparin binding;GO:0030275|LRR domain binding;GO:0019902|phosphatase binding;	K06491	NCAM; neural cell adhesion molecule
chr9	49797852	49798935	1084	49798251	51	12.7958	3.18926	8.34748	3_peak_2580	chr9	49642258	49798677	Intron	ENSMUSG00000039542	Ncam1	gi|568958952|ref|XP_006510125.1|	4802	0	PREDICTED: neural cell adhesion molecule 1 isoform X8 [Mus musculus]	gi|568958951|ref|XM_006510062.1|	6556	0	PREDICTED: Mus musculus neural cell adhesion molecule 1 (Ncam1), transcript variant X8, mRNA	P13595	1800	0	Neural cell adhesion molecule 1	.	.	.	.	pfam07679	I-set	Immunoglobulin I-set domain.	GO:0007568|aging;GO:0031100|organ regeneration;GO:0007411|axon guidance;GO:0016338|calcium-independent cell-cell adhesion via plasma membrane cell-adhesion molecules;GO:0007155|cell adhesion;GO:0071241|cellular response to inorganic substance;GO:0071219|cellular response to molecule of bacterial origin;GO:0007611|learning or memory;GO:0033555|multicellular organismal response to stress;GO:0060548…	GO:0030426|growth cone;GO:0016021|integral component of membrane;GO:0043025|neuronal cell body;GO:0005886|plasma membrane;	GO:0008092|cytoskeletal protein binding;GO:0005104|fibroblast growth factor receptor binding;GO:0008201|heparin binding;GO:0030275|LRR domain binding;GO:0019902|phosphatase binding;	K06491	NCAM; neural cell adhesion molecule
chr9	42909402	42909748	347	42909519	16	5.25827	3.08186	2.03572	3_peak_2569	chr9	42818974	42944326	Intron	ENSMUSG00000032017	Grik4	gi|304766513|ref|NP_780690.2|	5005	0	glutamate receptor ionotropic, kainate 4 precursor [Mus musculus]	gi|26099348|dbj|AK080582.1|	3560	0	Mus musculus 7 days neonate cerebellum cDNA, RIKEN full-length enriched library, clone:A730099P12 product:GLUTAMATE RECEPTOR, IONOTROPIC KAINATE 4 PRECURSOR (GLUTAMATE RECEPTOR KA-1) (KA1) homolog [Rattus norvegicus], full insert sequence	Q8BMF5	1930	0	Glutamate receptor ionotropic, kainate 4	TM0593	55.8	3e-07	COG0834	pfam00060	Lig_chan	Ligand-gated ion channel. This family includes the four transmembrane regions of the ionotropic glutamate receptors and NMDA receptors.	.	GO:0030054|cell junction;GO:0032983|kainate selective glutamate receptor complex;GO:0016020|membrane;GO:0045211|postsynaptic membrane;GO:0042734|presynaptic membrane;GO:0045202|synapse;	GO:0005234|extracellular-glutamate-gated ion channel activity;GO:0004970|ionotropic glutamate receptor activity;	K05204	GRIK4; glutamate receptor, ionotropic kainate 4
chr2	147524480	147524962	483	147524727	10	6.24326	4.39055	2.75792	3_peak_1434	-//-	-//-	-//-	--//--
chr5	101753408	101754023	616	101753755	49	19.0004	4.60927	14.1542	3_peak_1920	-//-	-//-	-//-	--//--
chr9	91364217	91365115	899	91364632	65	15.6147	3.17468	10.9287	3_peak_2649	chr9	91364035	91365341	Exon	ENSMUSG00000032368	Zic1	gi|675738990|ref|XP_002807704.2|	1828	0	PREDICTED: LOW QUALITY PROTEIN: zinc finger protein ZIC 1 [Callithrix jacchus]	gi|568961260|ref|XM_006511061.1|	5181	0	PREDICTED: Mus musculus zinc finger protein of the cerebellum 1 (Zic1), transcript variant X1, mRNA	P46684	702	0	Zinc finger protein ZIC 1	.	.	.	.	pfam13465	zf-H2C2_2	Zinc-finger double domain.	GO:0007628|adult walking behavior;GO:0007420|brain development;GO:0030154|cell differentiation;GO:0007417|central nervous system development;GO:0042472|inner ear morphogenesis;GO:0007389|pattern specification process;GO:0042307|positive regulation of protein import into nucleus;GO:0045944|positive regulation of transcription from RNA polymerase II promoter;GO:0045893|positive regulation of transc…	GO:0005737|cytoplasm;GO:0005654|nucleoplasm;GO:0005634|nucleus;	GO:0046872|metal ion binding;GO:0000978|RNA polymerase II core promoter proximal region sequence-specific DNA binding;GO:0000977|RNA polymerase II regulatory region sequence-specific DNA binding;GO:0003700|transcription factor activity, sequence-specific DNA binding;GO:0001077|transcriptional activator activity, RNA polymerase II core promoter proximal region sequence-specific binding;	K09224	ZIC1; zinc finger protein ZIC 1
chr9	91364217	91365115	899	91364632	65	15.6147	3.17468	10.9287	3_peak_2649	chr9	91364035	91365768	Exon	ENSMUSG00000032368	Zic1	gi|675738990|ref|XP_002807704.2|	1828	0	PREDICTED: LOW QUALITY PROTEIN: zinc finger protein ZIC 1 [Callithrix jacchus]	gi|568961260|ref|XM_006511061.1|	5181	0	PREDICTED: Mus musculus zinc finger protein of the cerebellum 1 (Zic1), transcript variant X1, mRNA	P46684	702	0	Zinc finger protein ZIC 1	.	.	.	.	pfam13465	zf-H2C2_2	Zinc-finger double domain.	GO:0007628|adult walking behavior;GO:0007420|brain development;GO:0030154|cell differentiation;GO:0007417|central nervous system development;GO:0042472|inner ear morphogenesis;GO:0007389|pattern specification process;GO:0042307|positive regulation of protein import into nucleus;GO:0045944|positive regulation of transcription from RNA polymerase II promoter;GO:0045893|positive regulation of transc…	GO:0005737|cytoplasm;GO:0005654|nucleoplasm;GO:0005634|nucleus;	GO:0046872|metal ion binding;GO:0000978|RNA polymerase II core promoter proximal region sequence-specific DNA binding;GO:0000977|RNA polymerase II regulatory region sequence-specific DNA binding;GO:0003700|transcription factor activity, sequence-specific DNA binding;GO:0001077|transcriptional activator activity, RNA polymerase II core promoter proximal region sequence-specific binding;	K09224	ZIC1; zinc finger protein ZIC 1
chr9	91364217	91365115	899	91364632	65	15.6147	3.17468	10.9287	3_peak_2649	chr9	91362518	91372607	Intron	ENSMUSG00000036972	Zic4	gi|1480005|dbj|BAA11240.1|	1803	0	Zic4 protein [Mus musculus]	gi|755530058|ref|XM_011242727.1|	3891	0	PREDICTED: Mus musculus zinc finger protein of the cerebellum 4 (Zic4), transcript variant X13, mRNA	Q61467	673	0	Zinc finger protein ZIC 4	SPAC144.02	68.2	9e-12	COG5048	pfam13465	zf-H2C2_2	Zinc-finger double domain.	.	GO:0005634|nucleus;	GO:0003677|DNA binding;GO:0046872|metal ion binding;	K09225	ZIC4; zinc finger protein ZIC 4
chr9	91364217	91365115	899	91364632	65	15.6147	3.17468	10.9287	3_peak_2649	chr9	91363054	91365054	Upstream2k	ENSMUSG00000032368	Zic1	gi|675738990|ref|XP_002807704.2|	1828	0	PREDICTED: LOW QUALITY PROTEIN: zinc finger protein ZIC 1 [Callithrix jacchus]	gi|568961260|ref|XM_006511061.1|	5181	0	PREDICTED: Mus musculus zinc finger protein of the cerebellum 1 (Zic1), transcript variant X1, mRNA	P46684	702	0	Zinc finger protein ZIC 1	.	.	.	.	pfam13465	zf-H2C2_2	Zinc-finger double domain.	GO:0007628|adult walking behavior;GO:0007420|brain development;GO:0030154|cell differentiation;GO:0007417|central nervous system development;GO:0042472|inner ear morphogenesis;GO:0007389|pattern specification process;GO:0042307|positive regulation of protein import into nucleus;GO:0045944|positive regulation of transcription from RNA polymerase II promoter;GO:0045893|positive regulation of transc…	GO:0005737|cytoplasm;GO:0005654|nucleoplasm;GO:0005634|nucleus;	GO:0046872|metal ion binding;GO:0000978|RNA polymerase II core promoter proximal region sequence-specific DNA binding;GO:0000977|RNA polymerase II regulatory region sequence-specific DNA binding;GO:0003700|transcription factor activity, sequence-specific DNA binding;GO:0001077|transcriptional activator activity, RNA polymerase II core promoter proximal region sequence-specific binding;	K09224	ZIC1; zinc finger protein ZIC 1
chr9	91364217	91365115	899	91364632	65	15.6147	3.17468	10.9287	3_peak_2649	chr9	91365017	91365341	UTR5	ENSMUSG00000032368	Zic1	gi|675738990|ref|XP_002807704.2|	1828	0	PREDICTED: LOW QUALITY PROTEIN: zinc finger protein ZIC 1 [Callithrix jacchus]	gi|568961260|ref|XM_006511061.1|	5181	0	PREDICTED: Mus musculus zinc finger protein of the cerebellum 1 (Zic1), transcript variant X1, mRNA	P46684	702	0	Zinc finger protein ZIC 1	.	.	.	.	pfam13465	zf-H2C2_2	Zinc-finger double domain.	GO:0007628|adult walking behavior;GO:0007420|brain development;GO:0030154|cell differentiation;GO:0007417|central nervous system development;GO:0042472|inner ear morphogenesis;GO:0007389|pattern specification process;GO:0042307|positive regulation of protein import into nucleus;GO:0045944|positive regulation of transcription from RNA polymerase II promoter;GO:0045893|positive regulation of transc…	GO:0005737|cytoplasm;GO:0005654|nucleoplasm;GO:0005634|nucleus;	GO:0046872|metal ion binding;GO:0000978|RNA polymerase II core promoter proximal region sequence-specific DNA binding;GO:0000977|RNA polymerase II regulatory region sequence-specific DNA binding;GO:0003700|transcription factor activity, sequence-specific DNA binding;GO:0001077|transcriptional activator activity, RNA polymerase II core promoter proximal region sequence-specific binding;	K09224	ZIC1; zinc finger protein ZIC 1
chr9	91364217	91365115	899	91364632	65	15.6147	3.17468	10.9287	3_peak_2649	chr9	91365017	91365768	UTR5	ENSMUSG00000032368	Zic1	gi|675738990|ref|XP_002807704.2|	1828	0	PREDICTED: LOW QUALITY PROTEIN: zinc finger protein ZIC 1 [Callithrix jacchus]	gi|568961260|ref|XM_006511061.1|	5181	0	PREDICTED: Mus musculus zinc finger protein of the cerebellum 1 (Zic1), transcript variant X1, mRNA	P46684	702	0	Zinc finger protein ZIC 1	.	.	.	.	pfam13465	zf-H2C2_2	Zinc-finger double domain.	GO:0007628|adult walking behavior;GO:0007420|brain development;GO:0030154|cell differentiation;GO:0007417|central nervous system development;GO:0042472|inner ear morphogenesis;GO:0007389|pattern specification process;GO:0042307|positive regulation of protein import into nucleus;GO:0045944|positive regulation of transcription from RNA polymerase II promoter;GO:0045893|positive regulation of transc…	GO:0005737|cytoplasm;GO:0005654|nucleoplasm;GO:0005634|nucleus;	GO:0046872|metal ion binding;GO:0000978|RNA polymerase II core promoter proximal region sequence-specific DNA binding;GO:0000977|RNA polymerase II regulatory region sequence-specific DNA binding;GO:0003700|transcription factor activity, sequence-specific DNA binding;GO:0001077|transcriptional activator activity, RNA polymerase II core promoter proximal region sequence-specific binding;	K09224	ZIC1; zinc finger protein ZIC 1
chr11	96005142	96005960	819	96005582	64	18.4869	3.65928	13.6605	3_peak_393	chr11	96004332	96006332	Downstream2k	ENSMUSG00000103376	Gm37179	.	.	.	.	gi|26094163|dbj|AK050857.1|	823	0	Mus musculus 9 days embryo whole body cDNA, RIKEN full-length enriched library, clone:D030026J23 product:unclassifiable, full insert sequence	.	.	.	.	.	.	.	.	pfam05110	AF-4	AF-4 proto-oncoprotein. This family consists of AF4 (Proto-oncogene AF4) and FMR2 (Fragile X E mental retardation syndrome) nuclear proteins. These proteins have been linked to human diseases such as acute lymphoblastic leukaemia and mental retardation. The family also contains a Drosophila AF4 protein homologue Lilliputian which contains an AT-hook domain. Lilliputian represents a novel pair-rul…	.	.	.	.	.
chr11	96005142	96005960	819	96005582	64	18.4869	3.65928	13.6605	3_peak_393	chr11	96005458	96005940	Exon	ENSMUSG00000013415	Igf2bp1	gi|6753518|ref|NP_034081.1|	2971	0	insulin-like growth factor 2 mRNA-binding protein 1 [Mus musculus]	gi|169234738|ref|NM_009951.4|	8378	0	Mus musculus insulin-like growth factor 2 mRNA binding protein 1 (Igf2bp1), mRNA	O42254	79.7	7e-15	Insulin-like growth factor 2 mRNA-binding protein 1	.	.	.	.	pfam00013	KH_1	KH domain. KH motifs bind RNA in vitro. Autoantibodies to Nova, a KH domain protein, cause paraneoplastic opsoclonus ataxia.	GO:0070934|CRD-mediated mRNA stabilization;GO:0051028|mRNA transport;GO:0017148|negative regulation of translation;GO:0097150|neuronal stem cell population maintenance;GO:0022013|pallium cell proliferation in forebrain;GO:0010610|regulation of mRNA stability involved in response to stress;	GO:0030424|axon;GO:0070937|CRD-mediated mRNA stability complex;GO:0005737|cytoplasm;GO:0010494|cytoplasmic stress granule;GO:0043197|dendritic spine;GO:0030175|filopodium;GO:0030426|growth cone;GO:0030529|ribonucleoprotein complex;GO:0030027|lamellipodium;GO:0005634|nucleus;GO:0048471|perinuclear region of cytoplasm;	GO:0003730|mRNA 3'-UTR binding;GO:0048027|mRNA 5'-UTR binding;GO:0003729|mRNA binding;GO:0000166|nucleotide binding;GO:0044822|poly(A) RNA binding;GO:0045182|translation regulator activity;	K17391	IGF2BP1; insulin-like growth factor 2 mRNA-binding protein 1
chr11	96005142	96005960	819	96005582	64	18.4869	3.65928	13.6605	3_peak_393	chr11	96005888	96005931	Exon	ENSMUSG00000099928	Gm29202	.	.	.	.	gi|644990253|tpe|HG981188.1|	422	0	TPA: Mus musculus long non-coding RNA OTTMUST00000119322.1 (RP23-235J5.13 gene), antisense	.	.	.	.	.	.	.	.	pfam15362	Enamelin	Enamelin. ENAMELIN is involved in the mineralisation and structural organisation of enamel. It is necessary for the extension of enamel during the secretory stage of dental enamel formation. The proteins are expressed in teeth, particularly in odontoblasts, ameloblasts and cementoblasts.	.	.	.	.	.
chr11	96005142	96005960	819	96005582	64	18.4869	3.65928	13.6605	3_peak_393	chr11	96004283	96005458	Intron	ENSMUSG00000013415	Igf2bp1	gi|6753518|ref|NP_034081.1|	2971	0	insulin-like growth factor 2 mRNA-binding protein 1 [Mus musculus]	gi|169234738|ref|NM_009951.4|	8378	0	Mus musculus insulin-like growth factor 2 mRNA binding protein 1 (Igf2bp1), mRNA	O42254	79.7	7e-15	Insulin-like growth factor 2 mRNA-binding protein 1	.	.	.	.	pfam00013	KH_1	KH domain. KH motifs bind RNA in vitro. Autoantibodies to Nova, a KH domain protein, cause paraneoplastic opsoclonus ataxia.	GO:0070934|CRD-mediated mRNA stabilization;GO:0051028|mRNA transport;GO:0017148|negative regulation of translation;GO:0097150|neuronal stem cell population maintenance;GO:0022013|pallium cell proliferation in forebrain;GO:0010610|regulation of mRNA stability involved in response to stress;	GO:0030424|axon;GO:0070937|CRD-mediated mRNA stability complex;GO:0005737|cytoplasm;GO:0010494|cytoplasmic stress granule;GO:0043197|dendritic spine;GO:0030175|filopodium;GO:0030426|growth cone;GO:0030529|ribonucleoprotein complex;GO:0030027|lamellipodium;GO:0005634|nucleus;GO:0048471|perinuclear region of cytoplasm;	GO:0003730|mRNA 3'-UTR binding;GO:0048027|mRNA 5'-UTR binding;GO:0003729|mRNA binding;GO:0000166|nucleotide binding;GO:0044822|poly(A) RNA binding;GO:0045182|translation regulator activity;	K17391	IGF2BP1; insulin-like growth factor 2 mRNA-binding protein 1
chr11	96005142	96005960	819	96005582	64	18.4869	3.65928	13.6605	3_peak_393	chr11	96005931	96006914	Intron	ENSMUSG00000099928	Gm29202	.	.	.	.	gi|644990253|tpe|HG981188.1|	422	0	TPA: Mus musculus long non-coding RNA OTTMUST00000119322.1 (RP23-235J5.13 gene), antisense	.	.	.	.	.	.	.	.	pfam15362	Enamelin	Enamelin. ENAMELIN is involved in the mineralisation and structural organisation of enamel. It is necessary for the extension of enamel during the secretory stage of dental enamel formation. The proteins are expressed in teeth, particularly in odontoblasts, ameloblasts and cementoblasts.	.	.	.	.	.
chr11	96005142	96005960	819	96005582	64	18.4869	3.65928	13.6605	3_peak_393	chr11	96005940	96007940	Upstream2k	ENSMUSG00000013415	Igf2bp1	gi|6753518|ref|NP_034081.1|	2971	0	insulin-like growth factor 2 mRNA-binding protein 1 [Mus musculus]	gi|169234738|ref|NM_009951.4|	8378	0	Mus musculus insulin-like growth factor 2 mRNA binding protein 1 (Igf2bp1), mRNA	O42254	79.7	7e-15	Insulin-like growth factor 2 mRNA-binding protein 1	.	.	.	.	pfam00013	KH_1	KH domain. KH motifs bind RNA in vitro. Autoantibodies to Nova, a KH domain protein, cause paraneoplastic opsoclonus ataxia.	GO:0070934|CRD-mediated mRNA stabilization;GO:0051028|mRNA transport;GO:0017148|negative regulation of translation;GO:0097150|neuronal stem cell population maintenance;GO:0022013|pallium cell proliferation in forebrain;GO:0010610|regulation of mRNA stability involved in response to stress;	GO:0030424|axon;GO:0070937|CRD-mediated mRNA stability complex;GO:0005737|cytoplasm;GO:0010494|cytoplasmic stress granule;GO:0043197|dendritic spine;GO:0030175|filopodium;GO:0030426|growth cone;GO:0030529|ribonucleoprotein complex;GO:0030027|lamellipodium;GO:0005634|nucleus;GO:0048471|perinuclear region of cytoplasm;	GO:0003730|mRNA 3'-UTR binding;GO:0048027|mRNA 5'-UTR binding;GO:0003729|mRNA binding;GO:0000166|nucleotide binding;GO:0044822|poly(A) RNA binding;GO:0045182|translation regulator activity;	K17391	IGF2BP1; insulin-like growth factor 2 mRNA-binding protein 1
chr11	96005142	96005960	819	96005582	64	18.4869	3.65928	13.6605	3_peak_393	chr11	96003888	96005888	Upstream2k	ENSMUSG00000099928	Gm29202	.	.	.	.	gi|644990253|tpe|HG981188.1|	422	0	TPA: Mus musculus long non-coding RNA OTTMUST00000119322.1 (RP23-235J5.13 gene), antisense	.	.	.	.	.	.	.	.	pfam15362	Enamelin	Enamelin. ENAMELIN is involved in the mineralisation and structural organisation of enamel. It is necessary for the extension of enamel during the secretory stage of dental enamel formation. The proteins are expressed in teeth, particularly in odontoblasts, ameloblasts and cementoblasts.	.	.	.	.	.
chr11	96005142	96005960	819	96005582	64	18.4869	3.65928	13.6605	3_peak_393	chr11	96005633	96005940	UTR5	ENSMUSG00000013415	Igf2bp1	gi|6753518|ref|NP_034081.1|	2971	0	insulin-like growth factor 2 mRNA-binding protein 1 [Mus musculus]	gi|169234738|ref|NM_009951.4|	8378	0	Mus musculus insulin-like growth factor 2 mRNA binding protein 1 (Igf2bp1), mRNA	O42254	79.7	7e-15	Insulin-like growth factor 2 mRNA-binding protein 1	.	.	.	.	pfam00013	KH_1	KH domain. KH motifs bind RNA in vitro. Autoantibodies to Nova, a KH domain protein, cause paraneoplastic opsoclonus ataxia.	GO:0070934|CRD-mediated mRNA stabilization;GO:0051028|mRNA transport;GO:0017148|negative regulation of translation;GO:0097150|neuronal stem cell population maintenance;GO:0022013|pallium cell proliferation in forebrain;GO:0010610|regulation of mRNA stability involved in response to stress;	GO:0030424|axon;GO:0070937|CRD-mediated mRNA stability complex;GO:0005737|cytoplasm;GO:0010494|cytoplasmic stress granule;GO:0043197|dendritic spine;GO:0030175|filopodium;GO:0030426|growth cone;GO:0030529|ribonucleoprotein complex;GO:0030027|lamellipodium;GO:0005634|nucleus;GO:0048471|perinuclear region of cytoplasm;	GO:0003730|mRNA 3'-UTR binding;GO:0048027|mRNA 5'-UTR binding;GO:0003729|mRNA binding;GO:0000166|nucleotide binding;GO:0044822|poly(A) RNA binding;GO:0045182|translation regulator activity;	K17391	IGF2BP1; insulin-like growth factor 2 mRNA-binding protein 1
chr1	174502423	174503023	601	174502704	20	8.32117	4.02437	4.42616	3_peak_158	chr1	174501824	174503591	Exon	ENSMUSG00000028354	Fmn2	gi|160707879|ref|NP_062318.2|	3560	0	formin-2 [Mus musculus]	gi|160707878|ref|NM_019445.2|	6442	0	Mus musculus formin 2 (Fmn2), mRNA	Q9JL04	193	6e-54	Formin-2	.	.	.	.	pfam02181	FH2	Formin Homology 2 Domain.	GO:0051017|actin filament bundle assembly;GO:0045010|actin nucleation;GO:0006974|cellular response to DNA damage stimulus;GO:0071456|cellular response to hypoxia;GO:0051295|establishment of meiotic spindle localization;GO:0070649|formin-nucleated actin cable assembly;GO:0051758|homologous chromosome movement towards spindle pole involved in homologous chromosome segregation;GO:0046907|intracellul…	GO:0005884|actin filament;GO:0005938|cell cortex;GO:0030659|cytoplasmic vesicle membrane;GO:0005829|cytosol;GO:0005783|endoplasmic reticulum;GO:0005789|endoplasmic reticulum membrane;GO:0005902|microvillus;GO:0005730|nucleolus;GO:0005886|plasma membrane;GO:0005819|spindle;	GO:0003779|actin binding;	K02184	FMN2; formin 2
chr13	116192568	116192925	358	116192854	10	6.6095	4.62198	3.04472	3_peak_683	-//-	-//-	-//-	--//--
chr12	33967241	33968019	779	33967658	70	26.2865	4.68823	21.2082	3_peak_484	-//-	-//-	-//-	--//--
chr19	44756753	44757435	683	44756890	56	6.28585	2.00741	2.7921	3_peak_1224	chr19	44756044	44757436	Exon	ENSMUSG00000004231	Pax2	gi|569006552|ref|XP_006526815.1|	1992	0	PREDICTED: paired box protein Pax-2 isoform X4 [Mus musculus]	gi|755562862|ref|XM_006526754.2|	3079	0	PREDICTED: Mus musculus paired box 2 (Pax2), transcript variant X8, mRNA	P32114	769	0	Paired box protein Pax-2	.	.	.	.	pfam00292	PAX	'Paired box' domain.	GO:0007568|aging;GO:0007409|axonogenesis;GO:0048854|brain morphogenesis;GO:0001658|branching involved in ureteric bud morphogenesis;GO:0043010|camera-type eye development;GO:0001709|cell fate determination;GO:0071364|cellular response to epidermal growth factor stimulus;GO:0071333|cellular response to glucose stimulus;GO:0070301|cellular response to hydrogen peroxide;GO:0071300|cellular response …	GO:0034451|centriolar satellite;GO:0005794|Golgi apparatus;GO:0005764|lysosome;GO:0005815|microtubule organizing center;GO:0005730|nucleolus;GO:0005634|nucleus;GO:0043234|protein complex;GO:0032993|protein-DNA complex;	GO:0000987|core promoter proximal region sequence-specific DNA binding;GO:0003677|DNA binding;GO:0016175|superoxide-generating NADPH oxidase activity;GO:0008134|transcription factor binding;GO:0044212|transcription regulatory region DNA binding;	K15608	PAX2; paired box protein 2
chr19	44756753	44757435	683	44756890	56	6.28585	2.00741	2.7921	3_peak_1224	chr19	44757393	44757436	Exon	ENSMUSG00000004231	Pax2	gi|569006552|ref|XP_006526815.1|	1992	0	PREDICTED: paired box protein Pax-2 isoform X4 [Mus musculus]	gi|755562862|ref|XM_006526754.2|	3079	0	PREDICTED: Mus musculus paired box 2 (Pax2), transcript variant X8, mRNA	P32114	769	0	Paired box protein Pax-2	.	.	.	.	pfam00292	PAX	'Paired box' domain.	GO:0007568|aging;GO:0007409|axonogenesis;GO:0048854|brain morphogenesis;GO:0001658|branching involved in ureteric bud morphogenesis;GO:0043010|camera-type eye development;GO:0001709|cell fate determination;GO:0071364|cellular response to epidermal growth factor stimulus;GO:0071333|cellular response to glucose stimulus;GO:0070301|cellular response to hydrogen peroxide;GO:0071300|cellular response …	GO:0034451|centriolar satellite;GO:0005794|Golgi apparatus;GO:0005764|lysosome;GO:0005815|microtubule organizing center;GO:0005730|nucleolus;GO:0005634|nucleus;GO:0043234|protein complex;GO:0032993|protein-DNA complex;	GO:0000987|core promoter proximal region sequence-specific DNA binding;GO:0003677|DNA binding;GO:0016175|superoxide-generating NADPH oxidase activity;GO:0008134|transcription factor binding;GO:0044212|transcription regulatory region DNA binding;	K15608	PAX2; paired box protein 2
chr19	44756753	44757435	683	44756890	56	6.28585	2.00741	2.7921	3_peak_1224	chr19	44755393	44757393	Upstream2k	ENSMUSG00000004231	Pax2	gi|569006552|ref|XP_006526815.1|	1992	0	PREDICTED: paired box protein Pax-2 isoform X4 [Mus musculus]	gi|755562862|ref|XM_006526754.2|	3079	0	PREDICTED: Mus musculus paired box 2 (Pax2), transcript variant X8, mRNA	P32114	769	0	Paired box protein Pax-2	.	.	.	.	pfam00292	PAX	'Paired box' domain.	GO:0007568|aging;GO:0007409|axonogenesis;GO:0048854|brain morphogenesis;GO:0001658|branching involved in ureteric bud morphogenesis;GO:0043010|camera-type eye development;GO:0001709|cell fate determination;GO:0071364|cellular response to epidermal growth factor stimulus;GO:0071333|cellular response to glucose stimulus;GO:0070301|cellular response to hydrogen peroxide;GO:0071300|cellular response …	GO:0034451|centriolar satellite;GO:0005794|Golgi apparatus;GO:0005764|lysosome;GO:0005815|microtubule organizing center;GO:0005730|nucleolus;GO:0005634|nucleus;GO:0043234|protein complex;GO:0032993|protein-DNA complex;	GO:0000987|core promoter proximal region sequence-specific DNA binding;GO:0003677|DNA binding;GO:0016175|superoxide-generating NADPH oxidase activity;GO:0008134|transcription factor binding;GO:0044212|transcription regulatory region DNA binding;	K15608	PAX2; paired box protein 2
chr19	44756753	44757435	683	44756890	56	6.28585	2.00741	2.7921	3_peak_1224	chr19	44756044	44757393	UTR5	ENSMUSG00000004231	Pax2	gi|569006552|ref|XP_006526815.1|	1992	0	PREDICTED: paired box protein Pax-2 isoform X4 [Mus musculus]	gi|755562862|ref|XM_006526754.2|	3079	0	PREDICTED: Mus musculus paired box 2 (Pax2), transcript variant X8, mRNA	P32114	769	0	Paired box protein Pax-2	.	.	.	.	pfam00292	PAX	'Paired box' domain.	GO:0007568|aging;GO:0007409|axonogenesis;GO:0048854|brain morphogenesis;GO:0001658|branching involved in ureteric bud morphogenesis;GO:0043010|camera-type eye development;GO:0001709|cell fate determination;GO:0071364|cellular response to epidermal growth factor stimulus;GO:0071333|cellular response to glucose stimulus;GO:0070301|cellular response to hydrogen peroxide;GO:0071300|cellular response …	GO:0034451|centriolar satellite;GO:0005794|Golgi apparatus;GO:0005764|lysosome;GO:0005815|microtubule organizing center;GO:0005730|nucleolus;GO:0005634|nucleus;GO:0043234|protein complex;GO:0032993|protein-DNA complex;	GO:0000987|core promoter proximal region sequence-specific DNA binding;GO:0003677|DNA binding;GO:0016175|superoxide-generating NADPH oxidase activity;GO:0008134|transcription factor binding;GO:0044212|transcription regulatory region DNA binding;	K15608	PAX2; paired box protein 2
chr19	6428698	6429139	442	6428889	35	9.37021	3.16757	5.31921	3_peak_1155	chr19	6427804	6428778	Exon	ENSMUSG00000033768	Nrxn2	gi|524919394|ref|XP_005063980.1|	8075	0	PREDICTED: neurexin-2-beta isoform X3 [Mesocricetus auratus]	gi|327365333|ref|NM_001205234.1|	6660	0	Mus musculus neurexin II (Nrxn2), transcript variant 1, mRNA	Q28142	150	2e-41	Neurexin-1-beta	.	.	.	.	pfam02210	Laminin_G_2	Laminin G domain. This family includes the Thrombospondin N-terminal-like domain, a Laminin G subfamily.	GO:0007155|cell adhesion;GO:0007268|synaptic transmission;GO:0097116|gephyrin clustering involved in postsynaptic density assembly;GO:0097118|neuroligin clustering involved in postsynaptic membrane assembly;GO:0007269|neurotransmitter secretion;GO:0097119|postsynaptic density protein 95 clustering;GO:0097104|postsynaptic membrane assembly;GO:0007165|signal transduction;GO:0007416|synapse assembly;	GO:0016021|integral component of membrane;GO:0005886|plasma membrane;GO:0098793|presynapse;	GO:0005246|calcium channel regulator activity;GO:0050839|cell adhesion molecule binding;GO:0046872|metal ion binding;GO:0097109|neuroligin family protein binding;GO:0004888|transmembrane signaling receptor activity;	K07377	NRXN; neurexin
chr19	6428698	6429139	442	6428889	35	9.37021	3.16757	5.31921	3_peak_1155	chr19	6427936	6428778	Exon	ENSMUSG00000033768	Nrxn2	gi|524919394|ref|XP_005063980.1|	8075	0	PREDICTED: neurexin-2-beta isoform X3 [Mesocricetus auratus]	gi|327365333|ref|NM_001205234.1|	6660	0	Mus musculus neurexin II (Nrxn2), transcript variant 1, mRNA	Q28142	150	2e-41	Neurexin-1-beta	.	.	.	.	pfam02210	Laminin_G_2	Laminin G domain. This family includes the Thrombospondin N-terminal-like domain, a Laminin G subfamily.	GO:0007155|cell adhesion;GO:0007268|synaptic transmission;GO:0097116|gephyrin clustering involved in postsynaptic density assembly;GO:0097118|neuroligin clustering involved in postsynaptic membrane assembly;GO:0007269|neurotransmitter secretion;GO:0097119|postsynaptic density protein 95 clustering;GO:0097104|postsynaptic membrane assembly;GO:0007165|signal transduction;GO:0007416|synapse assembly;	GO:0016021|integral component of membrane;GO:0005886|plasma membrane;GO:0098793|presynapse;	GO:0005246|calcium channel regulator activity;GO:0050839|cell adhesion molecule binding;GO:0046872|metal ion binding;GO:0097109|neuroligin family protein binding;GO:0004888|transmembrane signaling receptor activity;	K07377	NRXN; neurexin
chr19	6428698	6429139	442	6428889	35	9.37021	3.16757	5.31921	3_peak_1155	chr19	6428645	6428778	Exon	ENSMUSG00000033768	Nrxn2	gi|524919394|ref|XP_005063980.1|	8075	0	PREDICTED: neurexin-2-beta isoform X3 [Mesocricetus auratus]	gi|327365333|ref|NM_001205234.1|	6660	0	Mus musculus neurexin II (Nrxn2), transcript variant 1, mRNA	Q28142	150	2e-41	Neurexin-1-beta	.	.	.	.	pfam02210	Laminin_G_2	Laminin G domain. This family includes the Thrombospondin N-terminal-like domain, a Laminin G subfamily.	GO:0007155|cell adhesion;GO:0007268|synaptic transmission;GO:0097116|gephyrin clustering involved in postsynaptic density assembly;GO:0097118|neuroligin clustering involved in postsynaptic membrane assembly;GO:0007269|neurotransmitter secretion;GO:0097119|postsynaptic density protein 95 clustering;GO:0097104|postsynaptic membrane assembly;GO:0007165|signal transduction;GO:0007416|synapse assembly;	GO:0016021|integral component of membrane;GO:0005886|plasma membrane;GO:0098793|presynapse;	GO:0005246|calcium channel regulator activity;GO:0050839|cell adhesion molecule binding;GO:0046872|metal ion binding;GO:0097109|neuroligin family protein binding;GO:0004888|transmembrane signaling receptor activity;	K07377	NRXN; neurexin
chr19	6428698	6429139	442	6428889	35	9.37021	3.16757	5.31921	3_peak_1155	chr19	6428766	6428778	Exon	ENSMUSG00000033768	Nrxn2	gi|524919394|ref|XP_005063980.1|	8075	0	PREDICTED: neurexin-2-beta isoform X3 [Mesocricetus auratus]	gi|327365333|ref|NM_001205234.1|	6660	0	Mus musculus neurexin II (Nrxn2), transcript variant 1, mRNA	Q28142	150	2e-41	Neurexin-1-beta	.	.	.	.	pfam02210	Laminin_G_2	Laminin G domain. This family includes the Thrombospondin N-terminal-like domain, a Laminin G subfamily.	GO:0007155|cell adhesion;GO:0007268|synaptic transmission;GO:0097116|gephyrin clustering involved in postsynaptic density assembly;GO:0097118|neuroligin clustering involved in postsynaptic membrane assembly;GO:0007269|neurotransmitter secretion;GO:0097119|postsynaptic density protein 95 clustering;GO:0097104|postsynaptic membrane assembly;GO:0007165|signal transduction;GO:0007416|synapse assembly;	GO:0016021|integral component of membrane;GO:0005886|plasma membrane;GO:0098793|presynapse;	GO:0005246|calcium channel regulator activity;GO:0050839|cell adhesion molecule binding;GO:0046872|metal ion binding;GO:0097109|neuroligin family protein binding;GO:0004888|transmembrane signaling receptor activity;	K07377	NRXN; neurexin
chr19	6428698	6429139	442	6428889	35	9.37021	3.16757	5.31921	3_peak_1155	chr19	6426766	6428766	Upstream2k	ENSMUSG00000033768	Nrxn2	gi|524919394|ref|XP_005063980.1|	8075	0	PREDICTED: neurexin-2-beta isoform X3 [Mesocricetus auratus]	gi|327365333|ref|NM_001205234.1|	6660	0	Mus musculus neurexin II (Nrxn2), transcript variant 1, mRNA	Q28142	150	2e-41	Neurexin-1-beta	.	.	.	.	pfam02210	Laminin_G_2	Laminin G domain. This family includes the Thrombospondin N-terminal-like domain, a Laminin G subfamily.	GO:0007155|cell adhesion;GO:0007268|synaptic transmission;GO:0097116|gephyrin clustering involved in postsynaptic density assembly;GO:0097118|neuroligin clustering involved in postsynaptic membrane assembly;GO:0007269|neurotransmitter secretion;GO:0097119|postsynaptic density protein 95 clustering;GO:0097104|postsynaptic membrane assembly;GO:0007165|signal transduction;GO:0007416|synapse assembly;	GO:0016021|integral component of membrane;GO:0005886|plasma membrane;GO:0098793|presynapse;	GO:0005246|calcium channel regulator activity;GO:0050839|cell adhesion molecule binding;GO:0046872|metal ion binding;GO:0097109|neuroligin family protein binding;GO:0004888|transmembrane signaling receptor activity;	K07377	NRXN; neurexin
chr19	6428698	6429139	442	6428889	35	9.37021	3.16757	5.31921	3_peak_1155	chr19	6428778	6443630	Intron	ENSMUSG00000033768	Nrxn2	gi|524919394|ref|XP_005063980.1|	8075	0	PREDICTED: neurexin-2-beta isoform X3 [Mesocricetus auratus]	gi|327365333|ref|NM_001205234.1|	6660	0	Mus musculus neurexin II (Nrxn2), transcript variant 1, mRNA	Q28142	150	2e-41	Neurexin-1-beta	.	.	.	.	pfam02210	Laminin_G_2	Laminin G domain. This family includes the Thrombospondin N-terminal-like domain, a Laminin G subfamily.	GO:0007155|cell adhesion;GO:0007268|synaptic transmission;GO:0097116|gephyrin clustering involved in postsynaptic density assembly;GO:0097118|neuroligin clustering involved in postsynaptic membrane assembly;GO:0007269|neurotransmitter secretion;GO:0097119|postsynaptic density protein 95 clustering;GO:0097104|postsynaptic membrane assembly;GO:0007165|signal transduction;GO:0007416|synapse assembly;	GO:0016021|integral component of membrane;GO:0005886|plasma membrane;GO:0098793|presynapse;	GO:0005246|calcium channel regulator activity;GO:0050839|cell adhesion molecule binding;GO:0046872|metal ion binding;GO:0097109|neuroligin family protein binding;GO:0004888|transmembrane signaling receptor activity;	K07377	NRXN; neurexin
chr7	89590229	89590559	331	89590356	18	5.47616	3.00829	2.19534	3_peak_2278	-//-	-//-	-//-	--//--
chr4	63826801	63827371	571	63827180	17	6.3472	3.48084	2.83873	3_peak_1671	-//-	-//-	-//-	--//--
chr5	73650833	73651789	957	73651268	32	11.5282	3.97989	7.20922	3_peak_1895	chr5	73651378	73651672	Exon	ENSMUSG00000029155	Spata18	gi|226442916|ref|NP_848474.2|	2609	0	mitochondria-eating protein [Mus musculus]	gi|226442915|ref|NM_178387.3|	1949	0	Mus musculus spermatogenesis associated 18 (Spata18), mRNA	Q0P557	1009	0	Mitochondria-eating protein	.	.	.	.	pfam07964	Red1	Rec10 / Red1. Rec10 / Red1 is involved in meiotic recombination and chromosome segregation during homologous chromosome formation. This protein localizes to the synaptonemal complex in S. cerevisiae and the analogous structures (linear elements) in S. pombe. This family is currently only found in fungi.	GO:0030154|cell differentiation;GO:0006974|cellular response to DNA damage stimulus;GO:0035694|mitochondrial protein catabolic process;GO:0035695|mitophagy by induced vacuole formation;GO:0007275|multicellular organismal development;GO:0007283|spermatogenesis;	GO:0005737|cytoplasm;GO:0043231|intracellular membrane-bounded organelle;GO:0005741|mitochondrial outer membrane;	.	.	.
chr5	73650833	73651789	957	73651268	32	11.5282	3.97989	7.20922	3_peak_1895	chr5	73651381	73651672	Exon	ENSMUSG00000029155	Spata18	gi|226442916|ref|NP_848474.2|	2609	0	mitochondria-eating protein [Mus musculus]	gi|226442915|ref|NM_178387.3|	1949	0	Mus musculus spermatogenesis associated 18 (Spata18), mRNA	Q0P557	1009	0	Mitochondria-eating protein	.	.	.	.	pfam07964	Red1	Rec10 / Red1. Rec10 / Red1 is involved in meiotic recombination and chromosome segregation during homologous chromosome formation. This protein localizes to the synaptonemal complex in S. cerevisiae and the analogous structures (linear elements) in S. pombe. This family is currently only found in fungi.	GO:0030154|cell differentiation;GO:0006974|cellular response to DNA damage stimulus;GO:0035694|mitochondrial protein catabolic process;GO:0035695|mitophagy by induced vacuole formation;GO:0007275|multicellular organismal development;GO:0007283|spermatogenesis;	GO:0005737|cytoplasm;GO:0043231|intracellular membrane-bounded organelle;GO:0005741|mitochondrial outer membrane;	.	.	.
chr5	73650833	73651789	957	73651268	32	11.5282	3.97989	7.20922	3_peak_1895	chr5	73651672	73657494	Intron	ENSMUSG00000029155	Spata18	gi|226442916|ref|NP_848474.2|	2609	0	mitochondria-eating protein [Mus musculus]	gi|226442915|ref|NM_178387.3|	1949	0	Mus musculus spermatogenesis associated 18 (Spata18), mRNA	Q0P557	1009	0	Mitochondria-eating protein	.	.	.	.	pfam07964	Red1	Rec10 / Red1. Rec10 / Red1 is involved in meiotic recombination and chromosome segregation during homologous chromosome formation. This protein localizes to the synaptonemal complex in S. cerevisiae and the analogous structures (linear elements) in S. pombe. This family is currently only found in fungi.	GO:0030154|cell differentiation;GO:0006974|cellular response to DNA damage stimulus;GO:0035694|mitochondrial protein catabolic process;GO:0035695|mitophagy by induced vacuole formation;GO:0007275|multicellular organismal development;GO:0007283|spermatogenesis;	GO:0005737|cytoplasm;GO:0043231|intracellular membrane-bounded organelle;GO:0005741|mitochondrial outer membrane;	.	.	.
chr5	73650833	73651789	957	73651268	32	11.5282	3.97989	7.20922	3_peak_1895	chr5	73649378	73651378	Upstream2k	ENSMUSG00000029155	Spata18	gi|226442916|ref|NP_848474.2|	2609	0	mitochondria-eating protein [Mus musculus]	gi|226442915|ref|NM_178387.3|	1949	0	Mus musculus spermatogenesis associated 18 (Spata18), mRNA	Q0P557	1009	0	Mitochondria-eating protein	.	.	.	.	pfam07964	Red1	Rec10 / Red1. Rec10 / Red1 is involved in meiotic recombination and chromosome segregation during homologous chromosome formation. This protein localizes to the synaptonemal complex in S. cerevisiae and the analogous structures (linear elements) in S. pombe. This family is currently only found in fungi.	GO:0030154|cell differentiation;GO:0006974|cellular response to DNA damage stimulus;GO:0035694|mitochondrial protein catabolic process;GO:0035695|mitophagy by induced vacuole formation;GO:0007275|multicellular organismal development;GO:0007283|spermatogenesis;	GO:0005737|cytoplasm;GO:0043231|intracellular membrane-bounded organelle;GO:0005741|mitochondrial outer membrane;	.	.	.
chr5	73650833	73651789	957	73651268	32	11.5282	3.97989	7.20922	3_peak_1895	chr5	73649381	73651381	Upstream2k	ENSMUSG00000029155	Spata18	gi|226442916|ref|NP_848474.2|	2609	0	mitochondria-eating protein [Mus musculus]	gi|226442915|ref|NM_178387.3|	1949	0	Mus musculus spermatogenesis associated 18 (Spata18), mRNA	Q0P557	1009	0	Mitochondria-eating protein	.	.	.	.	pfam07964	Red1	Rec10 / Red1. Rec10 / Red1 is involved in meiotic recombination and chromosome segregation during homologous chromosome formation. This protein localizes to the synaptonemal complex in S. cerevisiae and the analogous structures (linear elements) in S. pombe. This family is currently only found in fungi.	GO:0030154|cell differentiation;GO:0006974|cellular response to DNA damage stimulus;GO:0035694|mitochondrial protein catabolic process;GO:0035695|mitophagy by induced vacuole formation;GO:0007275|multicellular organismal development;GO:0007283|spermatogenesis;	GO:0005737|cytoplasm;GO:0043231|intracellular membrane-bounded organelle;GO:0005741|mitochondrial outer membrane;	.	.	.
chr5	73650833	73651789	957	73651268	32	11.5282	3.97989	7.20922	3_peak_1895	chr5	73651378	73651585	UTR5	ENSMUSG00000029155	Spata18	gi|226442916|ref|NP_848474.2|	2609	0	mitochondria-eating protein [Mus musculus]	gi|226442915|ref|NM_178387.3|	1949	0	Mus musculus spermatogenesis associated 18 (Spata18), mRNA	Q0P557	1009	0	Mitochondria-eating protein	.	.	.	.	pfam07964	Red1	Rec10 / Red1. Rec10 / Red1 is involved in meiotic recombination and chromosome segregation during homologous chromosome formation. This protein localizes to the synaptonemal complex in S. cerevisiae and the analogous structures (linear elements) in S. pombe. This family is currently only found in fungi.	GO:0030154|cell differentiation;GO:0006974|cellular response to DNA damage stimulus;GO:0035694|mitochondrial protein catabolic process;GO:0035695|mitophagy by induced vacuole formation;GO:0007275|multicellular organismal development;GO:0007283|spermatogenesis;	GO:0005737|cytoplasm;GO:0043231|intracellular membrane-bounded organelle;GO:0005741|mitochondrial outer membrane;	.	.	.
chr5	73650833	73651789	957	73651268	32	11.5282	3.97989	7.20922	3_peak_1895	chr5	73651381	73651585	UTR5	ENSMUSG00000029155	Spata18	gi|226442916|ref|NP_848474.2|	2609	0	mitochondria-eating protein [Mus musculus]	gi|226442915|ref|NM_178387.3|	1949	0	Mus musculus spermatogenesis associated 18 (Spata18), mRNA	Q0P557	1009	0	Mitochondria-eating protein	.	.	.	.	pfam07964	Red1	Rec10 / Red1. Rec10 / Red1 is involved in meiotic recombination and chromosome segregation during homologous chromosome formation. This protein localizes to the synaptonemal complex in S. cerevisiae and the analogous structures (linear elements) in S. pombe. This family is currently only found in fungi.	GO:0030154|cell differentiation;GO:0006974|cellular response to DNA damage stimulus;GO:0035694|mitochondrial protein catabolic process;GO:0035695|mitophagy by induced vacuole formation;GO:0007275|multicellular organismal development;GO:0007283|spermatogenesis;	GO:0005737|cytoplasm;GO:0043231|intracellular membrane-bounded organelle;GO:0005741|mitochondrial outer membrane;	.	.	.
chr17	42025070	42025478	409	42025184	11	6.02577	4.09728	2.59017	3_peak_1027	-//-	-//-	-//-	--//--
chr4	149586979	149587737	759	149587511	34	10.8282	3.61883	6.58904	3_peak_1813	chr4	149587247	149587338	Exon	ENSMUSG00000039953	Clstn1	gi|12746426|ref|NP_075538.1|	4702	0	calsyntenin-1 isoform 1 precursor [Mus musculus]	gi|597436870|ref|NM_001290989.1|	4459	0	Mus musculus calsyntenin 1 (Clstn1), transcript variant 2, mRNA	Q9EPL2	516	5e-175	Calsyntenin-1	.	.	.	.	pfam13385	Laminin_G_3	Concanavalin A-like lectin/glucanases superfamily. This domain belongs to the Concanavalin A-like lectin/glucanases superfamily.	GO:0006874|cellular calcium ion homeostasis;GO:0007268|synaptic transmission;GO:0007156|homophilic cell adhesion via plasma membrane adhesion molecules;GO:0051965|positive regulation of synapse assembly;GO:0050806|positive regulation of synaptic transmission;GO:0001558|regulation of cell growth;	GO:0030054|cell junction;GO:0042995|cell projection;GO:0009986|cell surface;GO:0005789|endoplasmic reticulum membrane;GO:0070062|extracellular exosome;GO:0005576|extracellular region;GO:0000139|Golgi membrane;GO:0016021|integral component of membrane;GO:0005634|nucleus;GO:0014069|postsynaptic density;GO:0045211|postsynaptic membrane;	GO:0001540|beta-amyloid binding;GO:0005509|calcium ion binding;GO:0019894|kinesin binding;GO:0042988|X11-like protein binding;	.	.
chr4	149586979	149587737	759	149587511	34	10.8282	3.61883	6.58904	3_peak_1813	chr4	149586772	149614049	Intron	ENSMUSG00000039953	Clstn1	gi|12746426|ref|NP_075538.1|	4702	0	calsyntenin-1 isoform 1 precursor [Mus musculus]	gi|597436870|ref|NM_001290989.1|	4459	0	Mus musculus calsyntenin 1 (Clstn1), transcript variant 2, mRNA	Q9EPL2	516	5e-175	Calsyntenin-1	.	.	.	.	pfam13385	Laminin_G_3	Concanavalin A-like lectin/glucanases superfamily. This domain belongs to the Concanavalin A-like lectin/glucanases superfamily.	GO:0006874|cellular calcium ion homeostasis;GO:0007268|synaptic transmission;GO:0007156|homophilic cell adhesion via plasma membrane adhesion molecules;GO:0051965|positive regulation of synapse assembly;GO:0050806|positive regulation of synaptic transmission;GO:0001558|regulation of cell growth;	GO:0030054|cell junction;GO:0042995|cell projection;GO:0009986|cell surface;GO:0005789|endoplasmic reticulum membrane;GO:0070062|extracellular exosome;GO:0005576|extracellular region;GO:0000139|Golgi membrane;GO:0016021|integral component of membrane;GO:0005634|nucleus;GO:0014069|postsynaptic density;GO:0045211|postsynaptic membrane;	GO:0001540|beta-amyloid binding;GO:0005509|calcium ion binding;GO:0019894|kinesin binding;GO:0042988|X11-like protein binding;	.	.
chr4	149586979	149587737	759	149587511	34	10.8282	3.61883	6.58904	3_peak_1813	chr4	149587338	149614049	Intron	ENSMUSG00000039953	Clstn1	gi|12746426|ref|NP_075538.1|	4702	0	calsyntenin-1 isoform 1 precursor [Mus musculus]	gi|597436870|ref|NM_001290989.1|	4459	0	Mus musculus calsyntenin 1 (Clstn1), transcript variant 2, mRNA	Q9EPL2	516	5e-175	Calsyntenin-1	.	.	.	.	pfam13385	Laminin_G_3	Concanavalin A-like lectin/glucanases superfamily. This domain belongs to the Concanavalin A-like lectin/glucanases superfamily.	GO:0006874|cellular calcium ion homeostasis;GO:0007268|synaptic transmission;GO:0007156|homophilic cell adhesion via plasma membrane adhesion molecules;GO:0051965|positive regulation of synapse assembly;GO:0050806|positive regulation of synaptic transmission;GO:0001558|regulation of cell growth;	GO:0030054|cell junction;GO:0042995|cell projection;GO:0009986|cell surface;GO:0005789|endoplasmic reticulum membrane;GO:0070062|extracellular exosome;GO:0005576|extracellular region;GO:0000139|Golgi membrane;GO:0016021|integral component of membrane;GO:0005634|nucleus;GO:0014069|postsynaptic density;GO:0045211|postsynaptic membrane;	GO:0001540|beta-amyloid binding;GO:0005509|calcium ion binding;GO:0019894|kinesin binding;GO:0042988|X11-like protein binding;	.	.
chr4	149586979	149587737	759	149587511	34	10.8282	3.61883	6.58904	3_peak_1813	chr4	149585247	149587247	Upstream2k	ENSMUSG00000039953	Clstn1	gi|12746426|ref|NP_075538.1|	4702	0	calsyntenin-1 isoform 1 precursor [Mus musculus]	gi|597436870|ref|NM_001290989.1|	4459	0	Mus musculus calsyntenin 1 (Clstn1), transcript variant 2, mRNA	Q9EPL2	516	5e-175	Calsyntenin-1	.	.	.	.	pfam13385	Laminin_G_3	Concanavalin A-like lectin/glucanases superfamily. This domain belongs to the Concanavalin A-like lectin/glucanases superfamily.	GO:0006874|cellular calcium ion homeostasis;GO:0007268|synaptic transmission;GO:0007156|homophilic cell adhesion via plasma membrane adhesion molecules;GO:0051965|positive regulation of synapse assembly;GO:0050806|positive regulation of synaptic transmission;GO:0001558|regulation of cell growth;	GO:0030054|cell junction;GO:0042995|cell projection;GO:0009986|cell surface;GO:0005789|endoplasmic reticulum membrane;GO:0070062|extracellular exosome;GO:0005576|extracellular region;GO:0000139|Golgi membrane;GO:0016021|integral component of membrane;GO:0005634|nucleus;GO:0014069|postsynaptic density;GO:0045211|postsynaptic membrane;	GO:0001540|beta-amyloid binding;GO:0005509|calcium ion binding;GO:0019894|kinesin binding;GO:0042988|X11-like protein binding;	.	.
chr1	56977367	56978266	900	56977847	37	8.61864	2.88911	4.67805	3_peak_46b	chr1	56976802	56978640	Exon	ENSMUSG00000104310	Gm4081	.	.	.	.	gi|49258240|gb|AC101777.8|	1838	0	Mus musculus chromosome 1, clone RP24-123J3, complete sequence	.	.	.	.	.	.	.	.	pfam15356	SPR1	Psoriasis susceptibility locus 2. SPR1 is psoriasis susceptibility locus 2 protein family.	.	.	.	.	.
chr1	56977367	56978266	900	56977847	37	8.61864	2.88911	4.67805	3_peak_46b	chr1	56974321	56978420	Intron	ENSMUSG00000038331	Satb2	gi|829923130|ref|XP_012594554.1|	3378	0	PREDICTED: DNA-binding protein SATB2 isoform X1 [Microcebus murinus]	gi|37360203|dbj|AK129270.1|	6264	0	Mus musculus mRNA for mKIAA1034 protein	Q8VI24	243	2e-65	DNA-binding protein SATB2	.	.	.	.	pfam02376	CUT	CUT domain. The CUT domain is a DNA-binding motif which can bind independently or in cooperation with the homeodomain, often found downstream of the CUT domain. Multiple copies of the CUT domain can exist in one protein.	GO:0051216|cartilage development;GO:0071310|cellular response to organic substance;GO:0016569|covalent chromatin modification;GO:0006338|chromatin remodeling;GO:0021902|commitment of neuronal cell to specific neuron type in forebrain;GO:0009880|embryonic pattern specification;GO:0048704|embryonic skeletal system morphogenesis;GO:0000122|negative regulation of transcription from RNA polymerase II …	GO:0005737|cytoplasm;GO:0000118|histone deacetylase complex;GO:0000790|nuclear chromatin;GO:0016363|nuclear matrix;GO:0005654|nucleoplasm;GO:0005634|nucleus;GO:0005667|transcription factor complex;	GO:0003682|chromatin binding;GO:0003677|DNA binding;GO:0043565|sequence-specific DNA binding;	.	.
[truncated: 10,563 more rows]

## Sheet: intergenic 791
chr	start	end	length	summit	pileup	#NAME?	fold_enrichment	#NAME?	name	Chr	Start	End	Element	Gene	GeneName	NR:Seq-id	NR:Score	NR:Evalue	NR:Description	NT:Seq-id	NT:Score	NT:Evalue	NT:Description	Uniprot:UniProtKB-AC	Uniprot:Score	Uniprot:Evalue	Uniprot:Description	COG:gene	COG:Score	COG:Eval	COG:num	Pfam:pfam_ID	Pfam:pfam_Name	Pfam:pfam_Description	GO:biological_process	GO:cellular_component	GO:molecular_function	KEGG:KO	KEGG:Description
[truncated: 791 more rows]

[truncated: 6 more sheets: up2k 2146, down2k 723, exon 2786, intron 3281, UTR3 208, UTR5 980]
