# Supplementary figures and images for: LncRNA Snhg3 aggravates hepatic steatosis via PPARγ signaling
Source: eLife journal article supplement (doi:10.7554/elife.96988), 2024-05-13

Figure suppl. 2C

1.

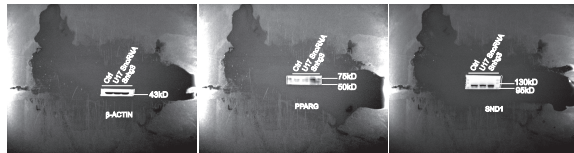

2.

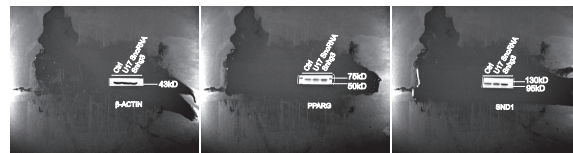

3.

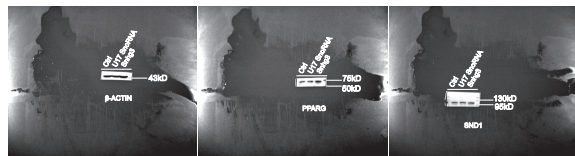

4.

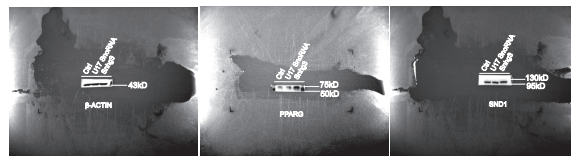

Supplement: fig7-figsupp1-data1 [file elife-96988-fig7-figsupp1-data1-v1.zip]
